# Supplementary material for: Iodonium based regioselective double nucleophilic alkene functionalization of a hydrofluoroolefin scaffold
Source: Royal Society of Chemistry journal article supplement (doi:10.1039/d3cc04985j), 2023-12-12

Supporting Information for

# Iodonium based regioselective double nucleophilic alkene functionalization of hydrofluoroolefin scaffold

by

János T. Csenki<sup>1</sup>, Zoltán Novák<sup>1\*</sup>

<sup>1</sup>MTA-ELTE “Lendület” Catalysis and Organic Synthesis Research Group, Eötvös Loránd University, Institute of Chemistry, Pázmány Péter stny. 1/A, H-1117 Budapest, Hungary

**Corresponding Author**

\* Zoltán Novák [novakz@ttk.elte.hu](mailto:novakz@ttk.elte.hu)

## Table of contents

|                                                                                                              |           |
|--------------------------------------------------------------------------------------------------------------|-----------|
| <b>1. General conditions</b> .....                                                                           | <b>4</b>  |
| <b>2. Optimization of the reaction conditions</b> .....                                                      | <b>5</b>  |
| 2.1 Examination of the reaction conditions of the alkene difunctionalization .....                           | 5         |
| 2.2 Further examination of the reaction conditions in the case of aliphatic amine.....                       | 6         |
| <b>3. Synthesis of starting materials</b> .....                                                              | <b>7</b>  |
| 3-Chloro-1,1,1,2-tetrafluoro-2-iodopropane (2) .....                                                         | 7         |
| (2-chloro-2,3,3,3-tetrafluoropropyl)(4-fluorophenyl)iodonium trifluoromethanesulfonate (3).....              | 7         |
| 3-(( <i>tert</i> -Butyldimethylsilyl)oxy)benzoic acid.....                                                   | 8         |
| 2-(2-Nitrophenoxy)ethan-1-ol .....                                                                           | 8         |
| 2-(2-Nitrophenoxy)ethyl 3-(( <i>tert</i> -butyldimethylsilyl)oxy)benzoate.....                               | 8         |
| 2-(2-Aminophenoxy)ethyl 3-hydroxybenzoate.....                                                               | 9         |
| <b>4. HCl elimination from the fluoroalkyl(aryl)iodonium salt</b> .....                                      | <b>10</b> |
| ( <i>Z</i> )-(4-Fluorophenyl)(2,3,3,3-tetrafluoroprop-1-en-1-yl)iodonium trifluoromethanesulfonate (4) ..... | 10        |
| <b>5. Reactions of phenols and anilines using the alkenyliodonium salt</b> .....                             | <b>11</b> |
| Ethyl 4-((1,1,1,2-tetrafluoro-3-(phenylamino)propan-2-yl)oxy)benzoate (8) .....                              | 11        |
| Ethyl 4-((3-((4-acetylphenyl)amino)-1,1,1,2-tetrafluoropropan-2-yl)oxy)benzoate (9) .....                    | 11        |
| Ethyl 4-((3-((4-chlorophenyl)amino)-1,1,1,2-tetrafluoropropan-2-yl)oxy)benzoate (10).....                    | 12        |
| Ethyl 4-((1,1,1,2-tetrafluoro-3-( <i>p</i> -tolylamino)propan-2-yl)oxy)benzoate (11) .....                   | 12        |
| Ethyl 4-((3-((3-acetylphenyl)amino)-1,1,1,2-tetrafluoropropan-2-yl)oxy)benzoate (13) .....                   | 13        |
| Ethyl 4-((3-((3-bromophenyl)amino)-1,1,1,2-tetrafluoropropan-2-yl)oxy)benzoate (14) .....                    | 13        |
| Ethyl 4-((1,1,1,2-tetrafluoro-3-((3-methoxyphenyl)amino)propan-2-yl)oxy)benzoate (15).....                   | 13        |
| Ethyl 4-((3-((2-acetylphenyl)amino)-1,1,1,2-tetrafluoropropan-2-yl)oxy)benzoate (16) .....                   | 14        |
| Ethyl 4-((1,1,1,2-tetrafluoro-3-((2-iodophenyl)amino)propan-2-yl)oxy)benzoate (17).....                      | 14        |
| Ethyl 4-((1,1,1,2-tetrafluoro-3-((2-methoxyphenyl)amino)propan-2-yl)oxy)benzoate (18).....                   | 15        |
| Ethyl 4-((1,1,1,2-tetrafluoro-3-( <i>o</i> -tolylamino)propan-2-yl)oxy)benzoate (19) .....                   | 15        |
| Ethyl 4-((1,1,1,2-tetrafluoro-3-(naphthalen-2-ylamino)propan-2-yl)oxy)benzoate (20).....                     | 16        |
| <i>N</i> -(2,3,3,3-tetrafluoro-2-phenoxypropyl)aniline (21) .....                                            | 16        |
| 4-Iodo- <i>N</i> -(2,3,3,3-tetrafluoro-2-phenoxypropyl)aniline (22).....                                     | 16        |
| <i>N</i> -(2,3,3,3-Tetrafluoro-2-(4-iodophenoxy)propyl)aniline (23).....                                     | 17        |
| 1-(4-((2,3,3,3-Tetrafluoro-2-( <i>p</i> -tolyl)oxy)propyl)amino)phenyl)ethan-1-one (24) .....                | 17        |
| 1-(4-((2-([1,1'-Biphenyl]-2-yloxy)-2,3,3,3-tetrafluoropropyl)amino)phenyl)ethan-1-one (25).....              | 17        |
| <i>N</i> -(2-(2-Bromo-4-chlorophenoxy)-2,3,3,3-tetrafluoropropyl)-3-iodoaniline (26) .....                   | 18        |
| 2-Bromo- <i>N</i> -(2,3,3,3-tetrafluoro-2-(2-iodophenoxy)propyl)aniline (27) .....                           | 18        |
| 2-Fluoro- <i>N</i> -(2,3,3,3-tetrafluoro-2-(naphthalen-2-yloxy)propyl)aniline (28).....                      | 19        |
| 2-Methyl- <i>N</i> -(2,3,3,3-tetrafluoro-2-(naphthalen-1-yloxy)propyl)aniline (29).....                      | 19        |
| 4-((1,1,1,2-Tetrafluoro-3-(methyl(phenyl)amino)propan-2-yl)oxy)benzaldehyde (30).....                        | 19        |
| <i>N</i> -Methyl- <i>N</i> -(2,3,3,3-tetrafluoro-2-(2-nitrophenoxy)propyl)aniline (31) .....                 | 20        |
| <i>N</i> -(2-(2-Chlorophenoxy)-2,3,3,3-tetrafluoropropyl)- <i>N</i> -methylaniline (32).....                 | 20        |

|                                                                                                                                    |           |
|------------------------------------------------------------------------------------------------------------------------------------|-----------|
| Ethyl 4-((1,1,1,2-tetrafluoro-3-(methyl(phenyl)amino)propan-2-yl)oxy)benzoate (33).....                                            | 21        |
| Ethyl 4-((3-(ethyl(phenyl)amino)-1,1,1,2-tetrafluoropropan-2-yl)oxy)benzoate (34).....                                             | 21        |
| Ethyl 4-((1,1,1,2-tetrafluoro-3-(indolin-1-yl)propan-2-yl)oxy)benzoate (35).....                                                   | 21        |
| Ethyl 4-((3-(3,4-dihydroisoquinolin-2(1 <i>H</i> )-yl)-1,1,1,2-tetrafluoropropan-2-yl)oxy)benzoate (36).....                       | 22        |
| Ethyl 4-((3-(benzylamino)-1,1,1,2-tetrafluoropropan-2-yl)oxy)benzoate (37).....                                                    | 22        |
| Ethyl 4-((3-((5-carbamoyl-1-methyl-3-propyl-1 <i>H</i> -pyrazol-4-yl)amino)-1,1,1,2-tetrafluoropropan-2-yl)oxy)benzoate (38).....  | 23        |
| Ethyl 4-((1,1,1,2-tetrafluoro-3-(3-phenyl-1 <i>H</i> -pyrazol-1-yl)propan-2-yl)oxy)benzoate (39).....                              | 23        |
| <i>N</i> -(2-((2-Bromopyridin-3-yl)oxy)-2,3,3,3-tetrafluoropropyl)-4-iodoaniline (40).....                                         | 24        |
| 1-(3-((2,3,3,3-Tetrafluoro-2-((1,1,1,3,3,3-hexafluoropropan-2-yl)oxy)propyl)amino)phenyl)ethan-1-one (41).....                     | 24        |
| Ethyl 4-((3-bromo-1,1,1,2-tetrafluoropropan-2-yl)oxy)benzoate (42).....                                                            | 24        |
| Ethyl 4-((1,1,1,2-tetrafluoro-3-thiocyanatopropan-2-yl)oxy)benzoate (43).....                                                      | 25        |
| 2-(4-(Ethoxycarbonyl)phenoxy)-2,3,3,3-tetrafluoropropyl 4-nitrobenzoate (44).....                                                  | 25        |
| 3-(2-(4-(Ethoxycarbonyl)phenoxy)-2,3,3,3-tetrafluoropropoxy)-1-oxo-1 <i>H</i> -isoindole 2-oxide (45).....                         | 26        |
| Ethyl 4-((3-(2,4-dinitrophenoxy)-1,1,1,2-tetrafluoropropan-2-yl)oxy)benzoate (46).....                                             | 26        |
| Ethyl 4-((1,1,1,2-tetrafluoro-3-(perchlorophenoxy)propan-2-yl)oxy)benzoate (47).....                                               | 27        |
| 2,2'-((2,3,3,3-Tetrafluoropropane-1,2-diyl)bis(oxy))bis(1,3,5-trichlorobenzene) (48).....                                          | 27        |
| 4,4'-((2,3,3,3-Tetrafluoropropane-1,2-diyl)bis(oxy))bis(3-nitro-1-(trifluoromethyl)benzene) (49).....                              | 28        |
| 3-Fluoro-3-(trifluoromethyl)-2,7,10-trioxa-5-aza-1(1,3),6(1,2)-dibenzenacycloundecaphan-11-one (50).....                           | 28        |
| <b>6. Reactions of phenols with aliphatic amines.....</b>                                                                          | <b>29</b> |
| Ethyl 4-((3-(butylamino)-1,1,1,2-tetrafluoropropan-2-yl)oxy)benzoate (52).....                                                     | 29        |
| Ethyl 4-((3-(3-azabicyclo[3.2.2]nonan-3-yl)-1,1,1,2-tetrafluoropropan-2-yl)oxy)benzoate (53).....                                  | 29        |
| Ethyl 4-((1,1,1,2-tetrafluoro-3-morpholinopropan-2-yl)oxy)benzoate (54).....                                                       | 30        |
| 1-(2-(4-(Ethoxycarbonyl)phenoxy)-2,3,3,3-tetrafluoropropyl)piperidin-1-ium chloride (55).....                                      | 30        |
| 1-(2-(4-(Ethoxycarbonyl)phenoxy)-2,3,3,3-tetrafluoropropyl)-4-(pyridin-1-ium-2-yl)piperazine-1,4-diium trichloride (56).....       | 31        |
| Ethyl 4-((1,1,1,2-tetrafluoro-3-(methyl(naphthalen-1-ylmethyl)amino)propan-2-yl)oxy)benzoate (57).....                             | 31        |
| <i>tert</i> -Butyl 3-((2-(4-(ethoxycarbonyl)phenoxy)-2,3,3,3-tetrafluoropropyl)(phenethyl)amino)azetidene -1-carboxylate (58)..... | 32        |
| <b>7. Unsuccessful attempts and selectivity.....</b>                                                                               | <b>32</b> |
| 7.1 Reaction of amine and iodonium salt.....                                                                                       | 32        |
| 7.2 Heterodisubstitution.....                                                                                                      | 33        |
| 7.3 Homodisubstitution.....                                                                                                        | 34        |
| <b>8. Proposed mechanism.....</b>                                                                                                  | <b>35</b> |
| <b>9. References.....</b>                                                                                                          | <b>35</b> |
| <b>10. NMR spectra.....</b>                                                                                                        | <b>35</b> |

## 1. General conditions

Unless otherwise indicated, starting materials were obtained from commercial suppliers, and were used without further purification. Analytical thin-layer chromatography (TLC) was performed on Merck DC pre-coated TLC plates with 0.25 mm Kieselgel 60 F<sub>254</sub>. Visualization was performed with a 254 nm UV lamp and KMnO<sub>4</sub> stain.

All melting points were measured on Büchi 501 apparatus.

The <sup>1</sup>H, <sup>13</sup>C and <sup>19</sup>F NMR spectra were recorded on Bruker Avance-400 and Bruker Avance-500 MHz spectrometer in CDCl<sub>3</sub>, CD<sub>3</sub>CN, DMSO-d<sub>6</sub>. Chemical shifts are expressed in parts per million (δ) using residual solvent protons as internal standards (CDCl<sub>3</sub>: δ 7.26 for <sup>1</sup>H, δ 77.16 for <sup>13</sup>C, CD<sub>3</sub>CN: δ 1.94 for <sup>1</sup>H, δ 1.32 for <sup>13</sup>C, DMSO-d<sub>6</sub>: δ 2.50 for <sup>1</sup>H, δ 39.52 for <sup>13</sup>C). Coupling constants (J) are reported in Hertz (Hz). Splitting patterns are designated as s (singlet), bs (broad singlet), d (doublet), t (triplet), q (quartet), dq (doublet quartet), qd (quartet doublet), m (multiplet).

Conversions determined by gas chromatography. This, and low-resolution mass spectrometry was obtained on an Agilent 6890N Gas Chromatograph (30 m x 0.25 mm column with 0.25 μm HP-5MS coating, He carrier gas) and Agilent 5973 Mass Spectrometer (Ion source: EI+, 70eV, 230°C interface 300°C). GC-MS conversion was calculated from the chromatogram using the integral of the peak belonging to the starting material (ISM) and the integral of the peak belonging to the products (IP):

$$conversion(\%) = \frac{IP_y}{\sum_{x=1}^n IP_x + ISM} \cdot 100$$

IR spectra were obtained on a Mettler Toledo ReactIR™ 15, AgX DiComp probe, 6 mm x 1.5 m Fiber (Silver Halide), MCT detector.

High-resolution mass spectra were acquired on an Agilent 6230 time-of-flight mass spectrometer equipped with a Jet Stream electrospray ion source in positive ion mode. Injections of 0.1-0.3 μl were directed to the mass spectrometer at a flow rate 0.5 ml/min (70% acetonitrile-water mixture, 0.1 % formic acid), using an Agilent 1260 Infinity HPLC system. Jet Stream parameters: drying gas (N<sub>2</sub>) flow and temperature: 10.0 l/min and 325 °C, respectively; nebulizer gas (N<sub>2</sub>) pressure: 10 psi; capillary voltage: 4000V; sheath gas flow and temperature: 325°C and 7.5 l/min; TOFMS parameters: fragmentor voltage: 120 V; skimmer potential: 120 V; OCT 1 RF Vpp:750 V. Full-scan mass spectra were acquired over the m/z range 100-2500 at an acquisition rate of 250 ms/spectrum and processed by Agilent MassHunter B.03.01 software.

## 2. Optimization of the reaction conditions

### 2.1 Examination of the reaction conditions of the alkene difunctionalization

Na<sub>2</sub>CO<sub>3</sub>, ethyl 4-hydroxybenzoate (16.6 mg, 0.10 mmol), 1-(3-Aminophenyl)ethan-1-one and MeCN (1 mL) were measured into a screw cap vial. (Z)-(4-fluorophenyl)(2,3,3,3-tetrafluoroprop-1-en-1-yl)iodonium trifluoromethanesulfonate was added in one portion to the stirred reaction mixture after 5 minutes. The mixture was stirred for further 1 hour at RT, then analyzed by NMR spectroscopy using 1-chloro-2-(trifluoromethyl)benzene as internal standard.

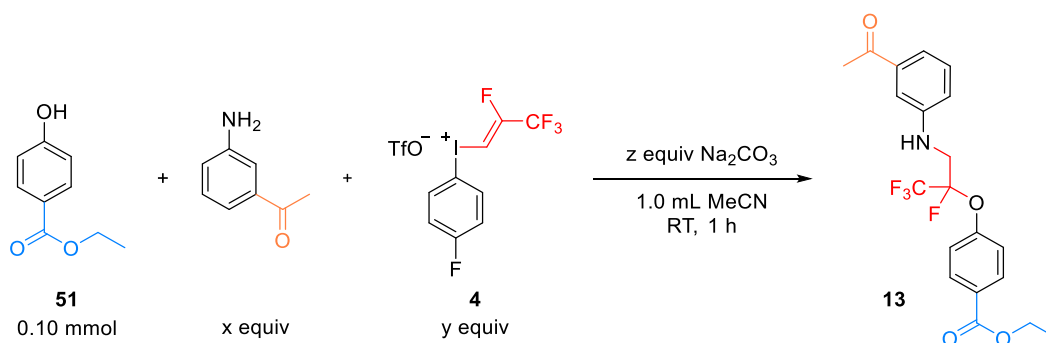

| Entry | x   | z   | y   | <sup>19</sup> F NMR yield <sup>a</sup> |
|-------|-----|-----|-----|----------------------------------------|
| 1     | 1.0 | 2.0 | 1.2 | 71%                                    |
| 2     | 2.0 | 2.0 | 1.2 | 78%                                    |
| 3     | 3.0 | 2.0 | 1.2 | 76%                                    |
| 4     | 2.0 | 0.0 | 1.2 | 0%                                     |
| 5     | 2.0 | 0.5 | 1.2 | 72%                                    |
| 6     | 2.0 | 1.0 | 1.2 | 78%                                    |
| 7     | 2.0 | 3.0 | 1.2 | 72%                                    |
| 8     | 2.0 | 1.0 | 1.0 | 68%                                    |
| 9     | 2.0 | 1.0 | 1.5 | 72%                                    |

<sup>a</sup>The yields were measured by NMR spectroscopy using 1-chloro-2-(trifluoromethyl)benzene as internal standard.

## 2.2 Further examination of the reaction conditions in the case of aliphatic amine

Na<sub>2</sub>CO<sub>3</sub>, ethyl 4-hydroxybenzoate (16.6 mg, 0.10 mmol), MeCN (1 mL) and piperidine were measured into a screw cap vial. (Z)-(4-fluorophenyl)(2,3,3,3-tetrafluoroprop-1-en-1-yl)iodonium trifluoromethanesulfonate was added in one portion to the stirred reaction mixture after 5 minutes. The mixture was stirred for further 1 hour at the given temperature, then analyzed by NMR spectroscopy using 1-chloro-2-(trifluoromethyl)benzene as internal standard.

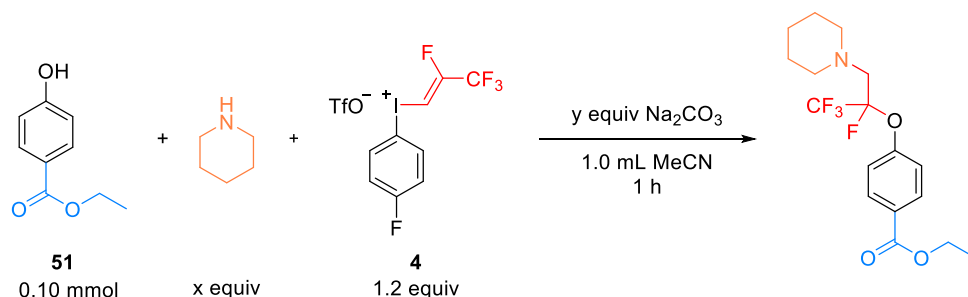

| Entry | T      | y   | x  | NMR yield <sup>a</sup> |
|-------|--------|-----|----|------------------------|
| 1     | RT     | 1   | 2  | 29%                    |
| 2     | 0 °C   | 1   | 2  | 32%                    |
| 3     | -20 °C | 1   | 2  | 31%                    |
| 4     | RT     | 0   | 2  | 7%                     |
| 5     | RT     | 0.1 | 2  | 7%                     |
| 6     | RT     | 2   | 2  | 37%                    |
| 7     | RT     | 1   | 1  | 12%                    |
| 8     | RT     | 1   | 10 | 3%                     |

<sup>a</sup>The yields were measured by NMR spectroscopy using 1-chloro-2-(trifluoromethyl)benzene as internal standard.

Na<sub>2</sub>CO<sub>3</sub> (10.6 mg, 0.1 mmol), ethyl 4-hydroxybenzoate (16.6 mg, 0.10 mmol), MeCN (1 mL) were measured into a screw cap vial. (Z)-(4-fluorophenyl)(2,3,3,3-tetrafluoroprop-1-en-1-yl)iodonium trifluoromethanesulfonate was added in one portion to the stirred reaction mixture after 5 minutes at the given temperature. After the given time (*t* min), the piperidine (20 μL, 17 mg, 0.20 mmol) was added to the reaction mixture and stirred for further 1 hour at the given temperature, then analyzed by NMR spectroscopy using 1-chloro-2-(trifluoromethyl)benzene as internal standard.

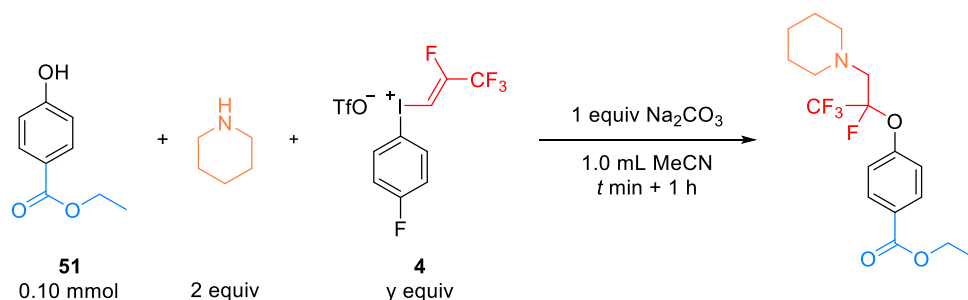

| Entry | T      | t /min | NMR yield <sup>a</sup> |
|-------|--------|--------|------------------------|
| 9     | RT     | 15     | 37%                    |
| 10    | 0 °C   | 15     | 46%                    |
| 11    | -20 °C | 15     | 50%                    |
| 12    | -40 °C | 15     | 34%                    |
| 13    | -20 °C | 60     | 58%                    |
| 14    | -20 °C | 180    | 45%                    |

<sup>a</sup>The yields were measured by NMR spectroscopy using 1-chloro-2-(trifluoromethyl)benzene as internal standard.

### 3. Synthesis of starting materials

#### 3-Chloro-1,1,1,2-tetrafluoro-2-iodopropane (2)

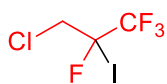

A 250 mL pressure flask was tared with the Teflon bottlecap and stirring bar. The flask was evacuated and refilled with HFO gas three times. 2,3,3,3-Tetrafluoroprop-1-ene (HFO-1234yf) gas was condensed and filled the flask about half (155.52 g, 1.364 mol) using liquid nitrogen bath then closed with the bottlecap. After the flask warmed up to room temperature the weight was measured and the required ICl amount was calculated. The flask was cooled down again using liquid nitrogen bath and the ICl (56.7 mL, 183.8 g, 1.132 mol) was added. The pressure flask was heated up to 50 °C using an oil bath for 3 hours. The reaction mixture cooled down until the next day to room temperature. The flask was cooled down again using liquid nitrogen bath then the bottlecap has been removed and the mixture was allowed to warm to room temperature. The dark oil was washed three times with 1:1 mixture of saturated NaHCO<sub>3</sub> and Na<sub>2</sub>SO<sub>3</sub> (using no organic solvent). The organic phase was washed twice with 50 mL cc. NaCl and dried by pushing through a plug of MgSO<sub>4</sub> using positive pressure. The product was stored in a dark vial on copper shavings and refrigerated.<sup>[3-4]</sup>

The addition reaction produces 5-7% regioisomer.

Yield: 217.5 g (0.787 mol, 70%) colorless oil. <sup>1</sup>H NMR (400 MHz, DMSO-*d*<sub>6</sub>) δ 4.55 (dd, *J* = 19.0, 13.5 Hz, 1H), 4.39 (dd, *J* = 19.5, 13.5 Hz, 1H). <sup>19</sup>F NMR (376 MHz, DMSO-*d*<sub>6</sub>) δ -74.7 (d, *J* = 11.8 Hz), -139.0 (q, *J* = 11.8 Hz). <sup>13</sup>C NMR (101 MHz, DMSO-*d*<sub>6</sub>) δ 121.5 (qd, *J* = 283.2, 29.2 Hz), 78.1 (dq, *J* = 255.6, 34.4 Hz), 48.4 (d, *J* = 22.1 Hz). MS (EI, 70 eV): *m/z* (%): 278 (13), 276 (41, [M<sup>+</sup>]), 177 (10), 162 (12), 151 (32), 149 (100), 148 (12), 127 (33), 113 (9), 95 (15), 69 (41). Spectral data is in accordance with data given in literature.<sup>[3-4]</sup>

#### (2-chloro-2,3,3,3-tetrafluoropropyl)(4-fluorophenyl)iodonium trifluoromethanesulfonate (3)

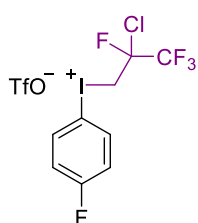

A screwed cap vial with a stirrer bar was evacuated and refilled with argon three times. Trifluoroacetic anhydride (49.42 g, 32.7 mL, 235 mmol) and catalytic amount of trifluoroacetic acid (0.75 g, 0.5 mL, 7 mmol) was added through syringe. The mixture was cooled to -10 °C, then hydrogen-peroxide (50 w/w% in water) (3.74 g, 3.2 mL, 55 mmol) was added dropwise within two minutes. 3-Chloro-1,1,1,2-tetrafluoro-2-iodopropane (13.82 g, 6.5 mL, 50 mmol) was added dropwise through syringe. The resulting reaction mixture was stirred for 16 hours at 35 °C. After that, the mixture was cooled to -20 °C, then freshly distilled dichloromethane (32.5 mL) was added to the mixture. Fluorobenzene (5.05 g, 5.0 mL, 52.5 mmol) was added dropwise to the reaction mixture, followed by the addition of trifluoromethanesulfonic acid (7.50 g, 4.5 mL, 50 mmol). The reaction mixture was kept between 0 °C and 4 °C for 16 hours. After that, all volatiles were removed under reduced pressure at 0 °C protected from light. The dark oil was shaken with cold (-20 °C) diethyl ether, getting white precipitate. The suspension was kept at -20 °C for 2 hours, then the white precipitate was filtered and washed with cold diethyl ether three times.<sup>[4]</sup>

Yield: 12.317 g (24 mmol, 47%) white solid. **Mp.** 129-130 °C. **MS** (EI, 70 eV): *m/z* (%): Compound decomposes in injector. <sup>1</sup>H NMR (400 MHz, Acetonitrile-*d*<sub>3</sub>) δ 8.22 (dd, *J* = 8.9, 4.8 Hz, 2H), 7.33 (t, *J* = 8.8 Hz, 2H), 5.09 (dd, *J* = 13.1, 8.7 Hz, 1H), 4.93 (dd, *J* = 28.1, 13.2 Hz, 1H). <sup>19</sup>F NMR (376 MHz, Acetonitrile-*d*<sub>3</sub>) δ -79.3, -80.9 (d, *J* = 6.2 Hz), -104.9, -118.3 (q, *J* = 6.2 Hz). <sup>13</sup>C NMR (101 MHz, Acetonitrile-*d*<sub>3</sub>) δ 166.6 (d, *J* = 254.8 Hz), 141.4 (d, *J* = 9.6 Hz), 121.7 (q, *J* = 320.0 Hz), 120.8 (d, *J* = 23.6

Hz), 119.9 (qd,  $J = 285.4, 31.2$  Hz), 104.7 (dq,  $J = 254.7, 38.4$  Hz), 103.8 (d,  $J = 3.3$  Hz), 41.7 (d,  $J = 21.9$  Hz). IR (solid, ATR) 1581, 1484, 1275, 1231, 1182, 1163, 1126, 1022, 1003, 929, 832, 813  $\text{cm}^{-1}$ . HRMS (ESI)  $[\text{M} - \text{OTf}]^+$  calculated for  $\text{C}_9\text{H}_6\text{ClF}_5\text{I}^+$ : 370.9123, found: 370.9120. Spectral data is in accordance with data given in literature.<sup>[4]</sup>

### 3-((*tert*-Butyldimethylsilyl)oxy)benzoic acid

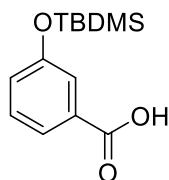

A solution of 3-hydroxybenzoic acid (2.76 g, 20.0 mmol), *tert*-butyldimethylsilyl chloride (6.70 g, 44.4 mmol) and imidazole (3.03 g, 44.4 mmol) in dry *N,N*-dimethylformamide (28 mL) was stirred at ambient temperature for 16h. Acetone (140 mL) was added to the reaction mixture, filtered and the filtrate was evaporated. The residue was taken up in ethyl-acetate (130 mL), washed with water (3x80 mL) and dried over  $\text{MgSO}_4$ , then filtrated. The solvent was removed under reduced pressure. The crude product, *tert*-butyldimethylsilyl 3-((*tert*-butyldimethylsilyl)oxy)benzoate, was treated with a mixture of acetic acid (42 mL), tetrahydrofuran (14 mL), water (14 mL) and stirred at ambient temperature for 2 h. Ethyl-acetate (140 mL) and water (100 mL) were added and the organic phase was extracted, washed with cc.  $\text{NaHCO}_3$  solution (4x80 mL) and dried over  $\text{MgSO}_4$ , then filtrated. The solvent was evaporated under reduced pressure to Celite and the crude product was purified by column chromatography using dichloromethane-methanol as eluent.<sup>[5]</sup>

Yield: 4.37 g (17.3 mmol, 87%) white solid.  $R_f = 0.74$  in dichloromethane: methanol 10:1.  $^1\text{H NMR}$  (400 MHz, Chloroform-*d*)  $\delta$  9.67 (bs, 1H), 7.73 (d,  $J = 7.7$  Hz, 1H), 7.58 (t,  $J = 2.2$  Hz, 1H), 7.34 (t,  $J = 7.9$  Hz, 1H), 7.09 (dd,  $J = 8.0, 1.4$  Hz, 1H), 1.01 (s, 9H), 0.23 (s, 6H).  $^{13}\text{C NMR}$  (101 MHz, Chloroform-*d*)  $\delta$  172.2, 155.9, 130.8, 129.7, 125.9, 123.4, 121.6, 25.8, 18.4, -4.3. Spectral data is in accordance with data given in literature.<sup>[5]</sup>

### 2-(2-Nitrophenoxy)ethan-1-ol

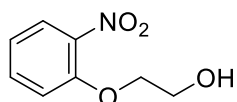

To a solution of 2-nitrophenol (1.11 g, 8 mmol) in acetone was added anhydrous  $\text{K}_2\text{CO}_3$  (2.21 g, 16 mmol), NaI (80 mg, 0.53 mmol). 2-Bromoethanol (5.00 g, 40 mmol) was added to the reaction mixture and stirred under reflux for 7 h. After cooling to ambient temperature, the solid was filtered, washed with acetone and the filtrate was evaporated. The residue was dissolved in dichloromethane, washed with 1M NaOH solution and cc. NaCl solution, dried over  $\text{Na}_2\text{SO}_4$ , then filtrated and evaporated.<sup>[6]</sup>

Yield: 1.37 g (7.46 mmol, 93%) brown oil.  $^1\text{H NMR}$  (400 MHz, Chloroform-*d*)  $\delta$  7.86 (dd,  $J = 8.1, 1.8$  Hz, 1H), 7.54 (td,  $J = 8.1, 7.5, 1.9$  Hz, 1H), 7.10 (d,  $J = 8.5$  Hz, 1H), 7.05 (t,  $J = 8.2$  Hz, 1H), 4.23 (t,  $J = 4.4$  Hz, 2H), 3.98 (dt,  $J = 6.6, 4.3$  Hz, 2H), 2.59 (t,  $J = 6.6$  Hz, 1H).  $^{13}\text{C NMR}$  (101 MHz, Chloroform-*d*)  $\delta$  152.4, 140.0, 134.5, 125.9, 121.1, 115.3, 71.5, 61.1. Spectral data is in accordance with data given in literature.<sup>[6]</sup>

### 2-(2-Nitrophenoxy)ethyl 3-((*tert*-butyldimethylsilyl)oxy)benzoate

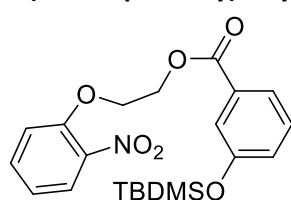

3-((*tert*-Butyldimethylsilyl)oxy)benzoic acid (1.67 g, 6.6 mmol) was dissolved in toluene (16 mL) then thionyl-chloride (2.9 mL, 4.71 g, 39.6 mmol) and 4 drops of *N,N*-dimethylformamide were added to the solution and heated at 80  $^\circ\text{C}$  for 3 h. The solvent was evaporated under



vacuum to give 3-((tert-butyldimethylsilyl)oxy)benzoyl chloride. The crude product was used in the next step without further purification.<sup>[7]</sup>

The previously isolated product was dissolved in freshly distilled THF (20 mL) under nitrogen atmosphere then 2-(2-nitrophenoxy)ethan-1-ol (6 mmol in 10 mL THF) and triethyl-amine (0.92 mL, 0.67 g, 6.6 mmol) were added to the reaction mixture and stirred overnight at ambient temperature. cc. NaHCO<sub>3</sub> was added, and the organic phase was separated. The remaining aqueous phase was extracted three times using ethyl-acetate. The organic phase was dried over Na<sub>2</sub>SO<sub>4</sub>, then filtrated. The solvent was evaporated under reduced pressure to Celite and the crude product was purified by column chromatography using hexane-ethyl acetate as eluent.<sup>[8]</sup>

Yield: 1.31 g (3.13 mmol, 52%) white solid. **Mp.** 72-74 °C. **R<sub>f</sub>**= 0.33 in hexane: ethyl-acetate 4:1. **MS** (EI, 70 eV): m/z (%): 362 (8), 361 (23), 360 (100), 316 (17), 239 (12), 235 (11), 223 (16), 196 (44), 195 (13), 193 (22), 179 (10), 151 (27), 150 (11), 136 (10), 135 (21), 121 (8), 120 (7), 92 (17), 91 (13), 78 (13), 75 (14), 73 (16). **<sup>1</sup>H NMR** (400 MHz, Chloroform-*d*) δ 7.83 (dd, *J* = 8.3, 1.6 Hz, 1H), 7.64 (d, *J* = 7.7 Hz, 1H), 7.56 – 7.47 (m, 2H), 7.29 (t, *J* = 8.1 Hz, 1H), 7.13 (d, *J* = 8.4 Hz, 1H), 7.08 – 7.02 (m, 2H), 4.70 (d, *J* = 4.6 Hz, 2H), 4.44 (t, *J* = 4.8 Hz, 2H), 0.98 (s, 9H), 0.20 (s, 6H). **<sup>13</sup>C NMR** (101 MHz, Chloroform-*d*) δ 166.4, 155.9, 152.0, 140.6, 134.1, 131.1, 129.6, 125.8, 125.3, 122.9, 121.3, 121.2, 115.3, 68.0, 62.8, 25.8, 18.3, -4.3. **IR** (film, ATR) 2955, 2937, 2859, 1723, 1607, 1585, 1525, 1488, 1439, 1410, 1354, 1279, 1257, 1219, 1167, 1100, 1078, 1055, 1003, 962, 932, 888, 839, 809, 783, 757, 746, 671 cm<sup>-1</sup>. **HRMS** (EI) [M-C<sub>4</sub>H<sub>9</sub>]<sup>+</sup> calculated for C<sub>17</sub>H<sub>18</sub>NO<sub>6</sub>Si<sup>+</sup>: 360.09034, found: 360.08809.

## 2-(2-Aminophenoxy)ethyl 3-hydroxybenzoate

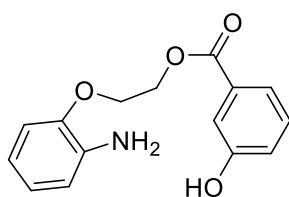

2-(2-nitrophenoxy)ethyl 3-((tert-butyldimethylsilyl)oxy)benzoate (1.14 g, 2.74 mmol) and iron powder (0.61 g, 11 mmol) were suspended in ethanol (10 mL) then cc. HCl (2 mL) was added dropwise within 30 min using Syringe Pump then the reaction mixture was stirred further 60 min at 80 °C. The pH of the reaction mixture was adjusted to 7 using NaOH and extracted three times with ethyl-acetate. The organic phase was dried over Na<sub>2</sub>SO<sub>4</sub>, filtered and evaporated. The crude product, mixture of 2-(2-aminophenoxy)ethyl 3-hydroxybenzoate and 2-(2-aminophenoxy)ethyl 3-((tert-butyldimethylsilyl)oxy)benzoate, was used in the next step without further purification.<sup>[9]</sup>

The previously isolated product (1.02 g) was dissolved in THF (7.5 mL) and cooled to 0°C. Tetra-*n*-butylammonium fluoride (TBAF) (2.6 mL, 1M in THF, 2.62 mmol) was added to the reaction mixture then stirred further 2 h at ambient temperature. The solvent was evaporated under reduced pressure to Celite and the crude product was purified by column chromatography using dichloromethane-methanol as eluent.<sup>[10]</sup>

Yield: 0.726 g (2.65 mmol, 97%) brown solid. **Mp.** 107-108 °C. **R<sub>f</sub>**= 0.71 in dichloromethane: methanol 4:1. **MS** (EI, 70 eV): m/z (%): Compound is not measurable using GC-MS. **<sup>1</sup>H NMR** (400 MHz, DMSO-*d*<sub>6</sub>) δ 9.85 (s, 1H), 7.44 – 7.37 (m, 2H), 7.32 (t, *J* = 7.9 Hz, 1H), 7.04 (d, *J* = 7.8 Hz, 1H), 6.84 (d, *J* = 7.8 Hz, 1H), 6.70 (t, *J* = 7.4 Hz, 1H), 6.64 (d, *J* = 6.4 Hz, 1H), 6.51 (t, *J* = 6.8 Hz, 1H), 4.67 (s, 2H), 4.59 (t, *J* = 4.6 Hz, 2H), 4.26 (t, *J* = 4.6 Hz, 2H). **<sup>13</sup>C NMR** (101 MHz, DMSO-*d*<sub>6</sub>) δ 165.9, 157.5, 145.2, 138.1, 130.9, 129.9, 121.6, 120.5, 120.0, 116.3, 115.7, 114.2, 112.6, 66.6, 63.5. **IR** (film, ATR) 1712, 1600, 1589, 1507, 1454, 1372, 1290, 1264, 1212, 1104, 1078, 999, 951, 929, 884, 805, 750, 682 cm<sup>-1</sup>. **HRMS** (EI) [M]<sup>+</sup> calculated for C<sub>15</sub>H<sub>15</sub>NO<sub>4</sub><sup>+</sup>: 273.10011, found: 273.09928.

#### 4. HCl elimination from the fluoroalkyl(aryl)iodonium salt

##### (Z)-(4-Fluorophenyl)(2,3,3,3-tetrafluoroprop-1-en-1-yl)iodonium trifluoromethanesulfonate (4)

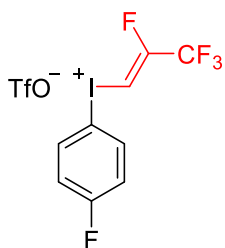

Preparation using NaH: A 50 mL round bottom flask was evacuated and refilled with argon three times while it was heated. The (2-chloro-2,3,3,3-tetrafluoropropyl)(4-fluorophenyl)iodonium trifluoromethanesulfonate (2602.8 mg, 5 mmol) was added to the flask and solved in freshly distilled acetonitrile (33 mL). The mixture was cooled to 0 °C, then 60 w/w% NaH (220 mg, 5.50 mmol) was added in one portion. It was stirred at 0 °C for 3 hours then allowed to warm to ambient temperature. The reaction mixture was filtered throw Celite and washed with acetonitrile. The filtrate was concentrated under vacuum then diethyl ether was added to the semi crystal residue. The white precipitate was filtered and washed with cold diethyl ether three times.<sup>[1-2]</sup> Yield: 1.7421 g (3.60 mmol, 72%) white solid. (The product contains unknown quantity of chloride salt, which is disturbing during its subsequent use.)

Preparation using Ag<sub>2</sub>O: The (2-chloro-2,3,3,3-tetrafluoropropyl)(4-fluorophenyl)iodonium trifluoromethanesulfonate (11.609 g, 22,3 mmol) was added to a 100 mL round bottom flask and solved in freshly distilled acetonitrile (85 mL). The mixture was stirred at ambient temerature until all the iodonium salt was dissolved, then Ag<sub>2</sub>O (3.101 g, 13.4 mmol, 1.2 equiv Ag<sup>+</sup>) was added in one portion. It was stirred for 2 hours (the brown Ag<sub>2</sub>O turns into white AgCl) then the reaction mixture was filtered throw Celite and washed with freshly distilled acetonitrile. The filtrate was concentrated under vacuum then diethyl ether was added to the residue. The white precipitate was filtered and washed with cold diethyl ether three times. Yield: 9.076 g (18.7 mmol, 84%) white solid.

**Mp.** 99-105 °C. **MS** (EI, 70 eV): m/z (%): Compound decomposes in injector. **<sup>1</sup>H NMR** (400 MHz, Acetonitrile-*d*<sub>3</sub>) δ 8.14 (dd, *J* = 8.9, 4.9 Hz, 2H), 7.55 (d, *J* = 33.7 Hz, 1H), 7.30 (t, *J* = 8.6 Hz, 2H). **<sup>19</sup>F NMR** (376 MHz, Acetonitrile-*d*<sub>3</sub>) δ -72.4 (d, *J* = 10.4 Hz), -79.3, -102.1 (q, *J* = 10.5 Hz), -106.2. **<sup>13</sup>C NMR** (101 MHz, Acetonitrile-*d*<sub>3</sub>) δ 166.0 (d, *J* = 253.7 Hz), 153.3 (dq, *J* = 273.7, 41.8 Hz), 139.9 (d, *J* = 9.4 Hz), 121.7 (q, *J* = 319.8 Hz), 120.7 (d, *J* = 23.6 Hz), 117.1 (qd, *J* = 274.6, 42.7 Hz), 109.6 (d, *J* = 3.0 Hz), 91.9 (dd, *J* = 15.6, 3.6 Hz). **IR** (solid, ATR) 1581, 1484, 1342, 1272, 1249, 1231, 1167, 1044, 1026, 835, 768, 716 cm<sup>-1</sup>. **HRMS** (ESI) [M - OTf]<sup>+</sup> calculated for C<sub>9</sub>H<sub>5</sub>F<sub>5</sub>I<sup>+</sup>: 334.9351, found: 334.9352.

## 5. Reactions of phenols and anilines using the alkenyliodonium salt

### Method A

Na<sub>2</sub>CO<sub>3</sub>, phenol derivative (0.3 mmol), “second” nucleophile (0.6 mmol) and MeCN (3.0 mL) were measured into a screw cap vial. The mixture was stirred at ambient temperature for 5 minutes and (Z)-(4-fluorophenyl)(2,3,3,3-tetrafluoroprop-1-en-1-yl)iodonium trifluoromethanesulfonate (174.3 mg, 0.36 mmol) was added in one portion. The mixture was stirred at ambient temperature for 1 hour. The solvent was evaporated under reduced pressure to Celite and the crude product was purified by column chromatography using hexanes-ethyl acetate as eluent.

### Ethyl 4-((1,1,1,2-tetrafluoro-3-(phenylamino)propan-2-yl)oxy)benzoate (8)

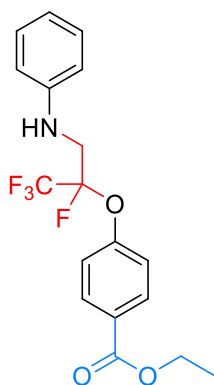

Method A. Using ethyl 4-hydroxybenzoate (49.9 mg, 0.3 mmol), Na<sub>2</sub>CO<sub>3</sub> (31.8 mg, 0.3 mmol), aniline (55  $\mu$ L, 55.9 mg, 0.6 mmol) and iodonium salt (174.3 mg, 0.36 mmol) in MeCN (3.0 mL).

Yield: 75.6 mg (0.20 mmol, 68%) yellow oil.  $R_f$  = 0.57 in hexane : ethyl acetate 4:1.

**MS** (EI, 70 eV):  $m/z$  (%): 371 (7, [M<sup>+</sup>]), 236 (2), 151 (3), 121 (6), 107 (8), 106 (100), 104 (7), 77 (10), 65 (5). **<sup>1</sup>H NMR** (400 MHz, Chloroform-*d*)  $\delta$  7.93 (d,  $J$  = 8.5 Hz, 2H), 7.13 (d,  $J$  = 8.5 Hz, 2H), 7.07 (t,  $J$  = 7.8 Hz, 2H), 6.67 (t,  $J$  = 7.4 Hz, 1H), 6.49 (d,  $J$  = 7.9 Hz, 2H), 4.27 (q,  $J$  = 7.1 Hz, 2H), 3.79 – 3.61 (m, 3H), 1.29 (t,  $J$  = 7.2 Hz, 3H). **<sup>19</sup>F NMR** (376 MHz, Chloroform-*d*)  $\delta$  -80.2 (d,  $J$  = 2.7 Hz), -125.7 (q,  $J$  = 2.8 Hz). **<sup>13</sup>C NMR** (101 MHz, Chloroform-*d*)  $\delta$  165.8, 155.4, 146.6, 131.4, 129.4, 128.2, 121.8

(d,  $J$  = 2.5 Hz), 120.6 (qd,  $J$  = 288.1, 37.8 Hz), 118.9, 113.3, 108.9 (dq,  $J$  = 241.5, 33.3 Hz), 61.3, 45.1 (d,  $J$  = 28.4 Hz), 14.4. **IR** (film, ATR) 1712, 1604, 1503, 1369, 1275, 1208, 1193, 1171, 1093, 1018, 943, 910, 861, 779, 750, 694 cm<sup>-1</sup>. **HRMS** (EI) [M]<sup>+</sup> calculated for C<sub>18</sub>H<sub>17</sub>F<sub>4</sub>NO<sub>3</sub><sup>+</sup>: 371.11446, found: 371.11237.

### Ethyl 4-((3-((4-acetylphenyl)amino)-1,1,1,2-tetrafluoropropan-2-yl)oxy)benzoate (9)

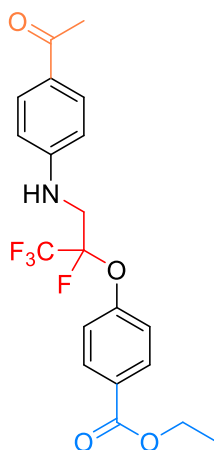

Method A. Using ethyl 4-hydroxybenzoate (49.9 mg, 0.3 mmol), Na<sub>2</sub>CO<sub>3</sub> (31.8 mg, 0.3 mmol), 1-(4-aminophenyl)ethan-1-one (81.1 mg, 0.6 mmol) and iodonium salt (174.3 mg, 0.36 mmol) in MeCN (3.0 mL).

Yield: 87.5 mg (0.21 mmol, 71%) yellow oil.  $R_f$  = 0.24 in hexane : ethyl acetate 2:1.

**MS** (EI, 70 eV):  $m/z$  (%): 413 (11, [M<sup>+</sup>]), 398 (2), 368 (2), 232 (2), 177 (7), 149 (10), 148 (100), 121 (6), 119 (4), 105 (8), 91 (3), 77 (3), 76 (3). **<sup>1</sup>H NMR** (400 MHz, Chloroform-*d*)  $\delta$  7.99 (d,  $J$  = 8.5 Hz, 2H), 7.79 (d,  $J$  = 8.5 Hz, 2H), 7.18 (d,  $J$  = 8.3 Hz, 2H), 6.59 (d,  $J$  = 8.5 Hz, 2H), 4.61 (s, 1H), 4.34 (q,  $J$  = 7.2 Hz, 2H), 3.96 – 3.79 (m, 2H), 2.47 (s, 3H), 1.36 (t,  $J$  = 7.2 Hz, 3H). **<sup>19</sup>F NMR** (376 MHz, Chloroform-*d*)  $\delta$  -80.0 (d,  $J$  = 2.7 Hz), -126.2 (q,  $J$  = 2.9 Hz). **<sup>13</sup>C NMR** (101 MHz, Chloroform-*d*)  $\delta$  196.6, 165.7, 155.3, 150.8, 131.4, 130.7, 128.3, 128.1, 121.7 (d,  $J$  = 2.5 Hz), 120.4 (qd,  $J$  = 288.2, 38.1 Hz), 112.0, 108.5 (dq,  $J$  = 242.0, 33.4 Hz), 61.3, 44.3 (d,  $J$  = 27.8 Hz),

26.1, 14.3. **IR** (film, ATR) 1715, 1663, 1600, 1536, 1503, 1421, 1361, 1331, 1309, 1275, 1208, 1171, 1096, 1018, 958, 865, 828, 779, 705 cm<sup>-1</sup>. **HRMS** (EI) [M]<sup>+</sup> calculated for C<sub>20</sub>H<sub>19</sub>F<sub>4</sub>NO<sub>4</sub><sup>+</sup>: 413.12502, found: 413.12278.

### Ethyl 4-((3-((4-chlorophenyl)amino)-1,1,1,2-tetrafluoropropan-2-yl)oxy)benzoate (10)

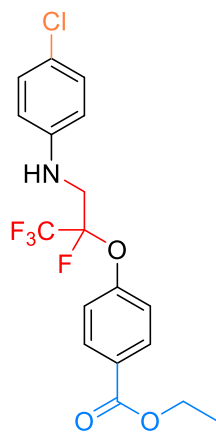

Method A. Using ethyl 4-hydroxybenzoate (49.9 mg, 0.3 mmol), Na<sub>2</sub>CO<sub>3</sub> (31.8 mg, 0.3 mmol), 4-chloroaniline (76.5 mg, 0.6 mmol) and iodonium salt (174.3 mg, 0.36 mmol) in MeCN (3.0 mL).

Yield: 92.8 mg (0.23 mmol, 76%) yellow oil. R<sub>f</sub> = 0.56 in hexane : ethyl acetate 4:1.

**MS** (EI, 70 eV): m/z (%): 407 (3), 405 (8, [M<sup>+</sup>]), 360 (2), 151 (5), 142 (32), 141 (8), 140 (100), 121 (8), 104 (9). **<sup>1</sup>H NMR** (400 MHz, Chloroform-*d*) δ 8.02 (d, *J* = 8.4 Hz, 2H), 7.21 (d, *J* = 8.4 Hz, 2H), 7.11 (d, *J* = 8.8 Hz, 2H), 6.52 (d, *J* = 8.5 Hz, 2H), 4.37 (q, *J* = 7.2 Hz, 2H), 3.89 (s, 1H), 3.84 – 3.69 (m, 2H), 1.39 (t, *J* = 7.2 Hz, 3H). **<sup>19</sup>F NMR** (376 MHz, Chloroform-*d*) δ -80.1 (d, *J* = 2.7 Hz), -125.8 (q, *J* = 2.6 Hz). **<sup>13</sup>C NMR** (101 MHz, Chloroform-*d*) δ 165.7, 155.4, 145.2, 131.4, 129.2, 128.3, 123.5, 121.8 (d, *J* = 2.7 Hz), 120.5 (qd, *J* = 287.9, 37.8 Hz), 114.4, 108.7 (dq, *J* = 241.2, 33.1 Hz), 61.3,

45.2 (d, *J* = 28.1 Hz), 14.4. **IR** (film, ATR) 1712, 1604, 1503, 1413, 1369, 1279, 1208, 1197, 1171, 1096, 1018, 865, 817, 779, 705 cm<sup>-1</sup>. **HRMS** (EI) [M]<sup>+</sup> calculated for C<sub>18</sub>H<sub>16</sub>ClF<sub>4</sub>NO<sub>3</sub><sup>+</sup>: 405.07548, found: 405.07313.

### Ethyl 4-((1,1,1,2-tetrafluoro-3-(*p*-tolylamino)propan-2-yl)oxy)benzoate (11)

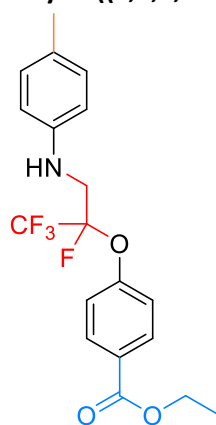

Method A. Using ethyl 4-hydroxybenzoate (49.9 mg, 0.3 mmol), Na<sub>2</sub>CO<sub>3</sub> (31.8 mg, 0.3 mmol), *p*-toluidine (64.3 mg, 0.6 mmol) and iodonium salt (174.3 mg, 0.36 mmol) in MeCN (3.0 mL).

Yield: 29.6 mg (0.08 mmol, 26%) yellow oil. R<sub>f</sub> = 0.63 in hexane : ethyl acetate 4:1.

**MS** (EI, 70 eV): m/z (%): 385 (8, [M<sup>+</sup>]), 340 (2), 151 (2), 121 (14), 120 (100), 104 (6), 91 (13). **<sup>1</sup>H NMR** (400 MHz, Chloroform-*d*) δ 8.03 (d, *J* = 8.7 Hz, 2H), 7.23 (d, *J* = 8.5 Hz, 2H), 6.98 (d, *J* = 8.2 Hz, 2H), 6.51 (d, *J* = 8.4 Hz, 2H), 4.38 (q, *J* = 7.1 Hz, 2H), 3.86 – 3.70 (m, 2H), 3.68 (bs, 1H), 2.24 (s, 3H), 1.40 (t, *J* = 7.1 Hz, 3H). **<sup>19</sup>F NMR** (376 MHz, Chloroform-*d*) δ -80.2 (d, *J* = 3.0 Hz), -125.6 (q, *J* = 3.0 Hz). **<sup>13</sup>C NMR** (101 MHz, Chloroform-*d*) δ 165.8, 155.5, 144.3, 131.4, 129.9, 128.2, 128.2, 121.9 (d, *J* = 2.5 Hz), 120.6 (qd, *J* = 288.2, 37.4 Hz), 113.5, 108.9 (dq, *J* = 240.9, 33.2 Hz), 61.3,

45.4 (d, *J* = 28.4 Hz), 20.5, 14.4. **IR** (film, ATR) 1712, 1604, 1525, 1507, 1413, 1369, 1275, 1208, 1193, 1171, 1093, 1048, 1018, 943, 914, 861, 809, 779, 705 cm<sup>-1</sup>. **IR** (film, ATR) 1712, 1604, 1525, 1507, 1413, 1369, 1275, 1208, 1193, 1171, 1093, 1048, 1018, 943, 914, 861, 809, 779, 705 cm<sup>-1</sup>. **HRMS** (EI) [M]<sup>+</sup> calculated for C<sub>19</sub>H<sub>19</sub>F<sub>4</sub>NO<sub>3</sub><sup>+</sup>: 385.13011, found: 385.12798.

### Ethyl 4-((3-((3-acetylphenyl)amino)-1,1,1,2-tetrafluoropropan-2-yl)oxy)benzoate (13)

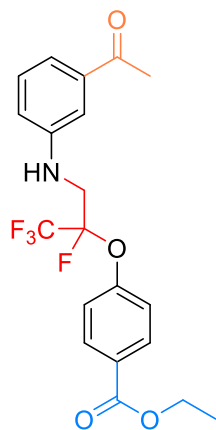

Method A. Using ethyl 4-hydroxybenzoate (49.9 mg, 0.3 mmol), Na<sub>2</sub>CO<sub>3</sub> (31.8 mg, 0.3 mmol), 1-(3-aminophenyl)ethan-1-one (81.1 mg, 0.6 mmol) and iodonium salt (174.3 mg, 0.36 mmol) in MeCN (3.0 mL).

Yield: 99.5 mg (0.24 mmol, 80%) yellow solid. **Mp.** 46-50 °C. **R<sub>f</sub>** = 0.31 in hexane : ethyl acetate 4:1. **MS** (EI, 70 eV): *m/z* (%): 413 (8, [M<sup>+</sup>]), 368 (2), 177 (3), 149 (11), 148 (100), 121 (7), 91 (4). **<sup>1</sup>H NMR** (400 MHz, Chloroform-*d*) δ 7.99 (d, *J* = 8.5 Hz, 2H), 7.27 (dd, *J* = 28.3, 7.9 Hz, 2H), 7.23 – 7.15 (m, 3H), 6.79 (dd, *J* = 7.9, 1.5 Hz, 1H), 4.35 (q, *J* = 7.1 Hz, 2H), 4.13 (bs, 1H), 3.90 – 3.76 (m, 2H), 2.52 (s, 3H), 1.36 (t, *J* = 7.2 Hz, 3H). **<sup>19</sup>F NMR** (376 MHz, Chloroform-*d*) δ -80.1 (d, *J* = 2.7 Hz), -125.6 (q, *J* = 2.8 Hz). **<sup>13</sup>C NMR** (101 MHz, Chloroform-*d*) δ 198.3, 165.7, 155.3, 146.9, 138.2, 131.4, 129.5, 128.2, 121.7 (d, *J* = 2.5 Hz), 120.5 (qd, *J* = 288.3, 37.8 Hz), 119.2,

117.8, 112.0, 108.7 (dq, *J* = 241.4, 33.2 Hz), 61.2, 44.8 (d, *J* = 28.5 Hz), 26.7, 14.3. **IR** (film, ATR) 1715, 1682, 1604, 1525, 1503, 1477, 1443, 1417, 1361, 1328, 1275, 1197, 1171, 1093, 1018, 973, 951, 917, 861, 779, 735, 705, 686 cm<sup>-1</sup>. **HRMS** (EI) [M]<sup>+</sup> calculated for C<sub>20</sub>H<sub>19</sub>F<sub>4</sub>NO<sub>4</sub><sup>+</sup>: 413.12502, found: 413.12336.

### Ethyl 4-((3-((3-bromophenyl)amino)-1,1,1,2-tetrafluoropropan-2-yl)oxy)benzoate (14)

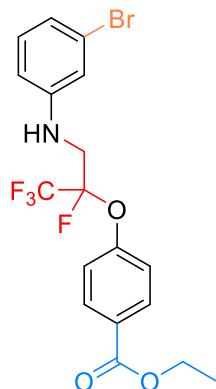

Method A. Using ethyl 4-hydroxybenzoate (49.9 mg, 0.3 mmol), Na<sub>2</sub>CO<sub>3</sub> (31.8 mg, 0.3 mmol), 3-bromoaniline (65 μL, 103.2 mg, 0.6 mmol) and iodonium salt (174.3 mg, 0.36 mmol) in MeCN (3.0 mL).

Yield: 103.3 mg (0.23 mmol, 76%) yellow oil. **R<sub>f</sub>** = 0.51 in hexane : ethyl acetate 4:1. **MS** (EI, 70 eV): *m/z* (%): 451 (2), 449 (2, [M<sup>+</sup>]), 406 (2), 404 (2), 187 (8), 186 (94), 185 (10), 184 (100), 151 (8), 136 (4), 121 (15), 106 (12), 105 (22), 104 (21), 91 (6), 76 (12). **<sup>1</sup>H NMR** (400 MHz, Chloroform-*d*) δ 8.03 (d, *J* = 8.4 Hz, 2H), 7.21 (d, *J* = 8.3 Hz, 2H), 7.00 (t, *J* = 8.0 Hz, 1H), 6.89 – 6.82 (m, 1H), 6.70 (t, *J* = 2.2 Hz, 1H), 6.51 (dd, *J* = 8.1, 2.6 Hz, 1H), 4.37 (q, *J* = 7.1 Hz, 2H), 3.96 (s, 1H), 3.85 – 3.69 (m, 2H), 1.39 (t, *J* = 7.1 Hz, 3H). **<sup>19</sup>F NMR** (376 MHz, Chloroform-*d*) δ -80.1 (d, *J* = 2.7 Hz), -

125.5 (q, *J* = 2.8 Hz). **<sup>13</sup>C NMR** (101 MHz, Chloroform-*d*) δ 165.7, 155.3, 147.9, 131.5, 130.6, 128.3, 123.3, 121.7 (d, *J* = 2.5 Hz), 121.7, 120.5 (qd, *J* = 288.3, 38.1 Hz), 116.0, 111.9, 108.7 (dq, *J* = 241.3, 33.1 Hz), 61.3, 44.7 (d, *J* = 28.5 Hz), 14.4. **IR** (film, ATR) 1708, 1596, 1503, 1480, 1369, 1324, 1275, 1193, 1171, 1093, 1018, 988, 947, 917, 861, 843, 761, 705, 679 cm<sup>-1</sup>. **HRMS** (EI) [M]<sup>+</sup> calculated for C<sub>18</sub>H<sub>16</sub>BrF<sub>4</sub>NO<sub>3</sub><sup>+</sup>: 449.02497, found: 449.02366.

### Ethyl 4-((1,1,1,2-tetrafluoro-3-((3-methoxyphenyl)amino)propan-2-yl)oxy)benzoate (15)

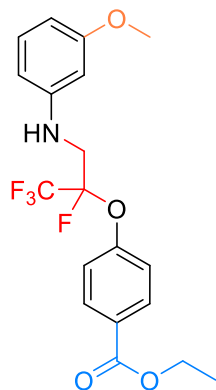

Method A. Using ethyl 4-hydroxybenzoate (49.9 mg, 0.3 mmol), Na<sub>2</sub>CO<sub>3</sub> (31.8 mg, 0.3 mmol), 3-methoxyaniline (67 μL, 73.9 mg, 0.6 mmol) and iodonium salt (174.3 mg, 0.36 mmol) in MeCN (3.0 mL).

Yield: 89.0 mg (0.22 mmol, 74%) yellow oil. **R<sub>f</sub>** = 0.42 in hexane : ethyl acetate 4:1. **MS** (EI, 70 eV): *m/z* (%): 401 (9, [M<sup>+</sup>]), 356 (2), 151 (4), 137 (9), 136 (100), 121 (8), 108 (5), 104 (6), 92 (5), 77 (5). **<sup>1</sup>H NMR** (400 MHz, Chloroform-*d*) δ 8.03 (d, *J* = 8.7 Hz, 2H), 7.23 (d, *J* = 8.4 Hz, 2H), 7.08 (t, *J* = 8.1 Hz, 1H), 6.34 (dd, *J* = 8.2, 2.4 Hz, 1H), 6.22 (dd, *J* = 8.1, 2.3 Hz, 1H), 6.15 (t, *J* = 2.4 Hz, 1H), 4.38 (q, *J* = 7.1 Hz, 2H), 3.88 – 3.69 (m, 6H), 1.40 (t, *J* = 7.2 Hz, 3H). **<sup>19</sup>F NMR** (376 MHz, Chloroform-*d*) δ -80.2 (d, *J* = 2.9 Hz), -125.7 (q, *J* = 2.8 Hz). **<sup>13</sup>C NMR** (101 MHz, Chloroform-*d*) δ 165.8, 160.9,

155.4, 148.0, 131.4, 130.2, 128.2, 121.8 (d,  $J = 2.5$  Hz), 120.6 (qd,  $J = 287.7, 37.6$  Hz), 108.8 (dq,  $J = 241.2, 33.1$  Hz), 106.2, 103.9, 99.5, 61.2, 55.1, 45.0 (d,  $J = 28.4$  Hz), 14.4. **IR** (film, ATR) 1715, 1604, 1521, 1503, 1466, 1369, 1279, 1212, 1167, 1096, 1048, 1018, 861, 832, 761, 709, 686  $\text{cm}^{-1}$ . **HRMS** (EI)  $[\text{M}]^+$  calculated for  $\text{C}_{19}\text{H}_{19}\text{F}_4\text{NO}_4^+$ : 401.12502, found: 401.12458.

#### Ethyl 4-((3-((2-acetylphenyl)amino)-1,1,1,2-tetrafluoropropan-2-yl)oxy)benzoate (16)

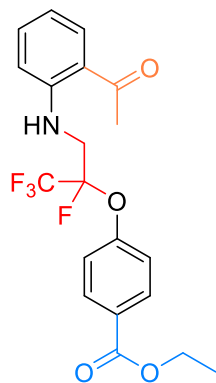

Method A. Using ethyl 4-hydroxybenzoate (49.9 mg, 0.3 mmol),  $\text{Na}_2\text{CO}_3$  (31.8 mg, 0.3 mmol), 1-(2-aminophenyl)ethan-1-one (36  $\mu\text{L}$ , 40.5 mg, 0.3 mmol, 1 equiv in this case, due to purification problems) and iodonium salt (174.3 mg, 0.36 mmol) in MeCN (3.0 mL).

Yield: 79.0 mg (0.19 mmol, 64%) yellow oil.  $R_f = 0.50$  in hexane : ethyl acetate 4:1. **MS** (EI, 70 eV):  $m/z$  (%): 413 (9,  $[\text{M}^+]$ ), 368 (3), 247 (6), 149 (11), 148 (100), 130 (41), 121 (11), 106 (17), 104 (11), 103 (11), 92 (10), 77 (15).  **$^1\text{H NMR}$**  (400 MHz, Chloroform- $d$ )  $\delta$  9.17 (t,  $J = 5.9$  Hz, 1H), 7.90 (d,  $J = 8.9$  Hz, 2H), 7.65 (dd,  $J = 8.0, 1.7$  Hz, 1H), 7.23 (t,  $J = 7.7$  Hz, 1H), 7.18 (d,  $J = 8.1$  Hz, 2H), 6.61 – 6.49 (m, 2H), 4.26 (q,  $J = 7.1$  Hz, 2H), 3.87 – 3.65 (m, 2H), 2.49 (s, 3H), 1.28 (t,  $J = 7.2$  Hz, 3H).  **$^{19}\text{F NMR}$**

(376 MHz, Chloroform- $d$ )  $\delta$  -80.7 (d,  $J = 2.8$  Hz), -123.9 (q,  $J = 3.0$  Hz).  **$^{13}\text{C NMR}$**  (101 MHz, Chloroform- $d$ )  $\delta$  201.3, 165.8, 155.2, 149.8, 135.1, 132.8, 131.4, 128.2, 121.9 (d,  $J = 2.5$  Hz), 120.5 (qd,  $J = 287.7, 36.7$  Hz), 118.6, 115.7, 111.4, 108.7 (dq,  $J = 240.5, 33.5$  Hz), 61.2, 43.1 (d,  $J = 31.1$  Hz), 28.0, 14.4. **IR** (film, ATR) 1719, 1645, 1607, 1581, 1525, 1507, 1462, 1432, 1365, 1328, 1275, 1238, 1212, 1167, 1096, 1044, 1022, 955, 865, 750, 709  $\text{cm}^{-1}$ . **HRMS** (EI)  $[\text{M}]^+$  calculated for  $\text{C}_{20}\text{H}_{19}\text{F}_4\text{NO}_4^+$ : 413.12502, found: 413.12277.

#### Ethyl 4-((1,1,1,2-tetrafluoro-3-((2-iodophenyl)amino)propan-2-yl)oxy)benzoate (17)

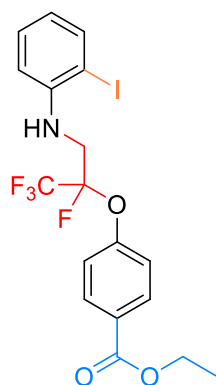

Method A. Using ethyl 4-hydroxybenzoate (49.9 mg, 0.3 mmol),  $\text{Na}_2\text{CO}_3$  (31.8 mg, 0.3 mmol), 2-iodoaniline (131.4 mg, 0.6 mmol) and iodonium salt (174.3 mg, 0.36 mmol) in MeCN (3.0 mL).

Yield: 99.5 mg (0.20 mmol, 67%) orange oil.  $R_f = 0.39$  in hexane : dichloromethane 4:1. **MS** (EI, 70 eV):  $m/z$  (%): 497 (13,  $[\text{M}^+]$ ), 452 (2), 371 (1), 233 (9), 232 (100), 136 (4), 121 (8), 106 (11), 105 (25), 104 (25), 91 (7), 78 (7), 77 (9), 76 (8).  **$^1\text{H NMR}$**  (400 MHz, Chloroform- $d$ )  $\delta$  7.93 (d,  $J = 8.9$  Hz, 2H), 7.55 (dd,  $J = 7.8, 1.6$  Hz, 1H), 7.17 (d,  $J = 8.0$  Hz, 2H), 7.07 (t,  $J = 7.2$  Hz, 1H), 6.45 – 6.36 (m, 2H), 4.31 (s, 1H), 4.27 (q,  $J = 7.2$  Hz, 2H), 3.72 (dd,  $J = 10.5, 6.4$  Hz, 2H), 1.29 (t,  $J = 7.2$  Hz, 3H).  **$^{19}\text{F NMR}$**  (376 MHz, Chloroform- $d$ )  $\delta$  -80.4 (d,  $J = 3.1$  Hz), -124.7 (q,  $J = 3.0$  Hz).  **$^{13}\text{C NMR}$**  (101 MHz, Chloroform- $d$ )  $\delta$  165.7, 155.2, 145.7, 139.3, 131.5, 129.5, 128.4, 121.9 (d,  $J = 2.4$  Hz), 120.5 (qd,  $J = 287.9, 37.1$  Hz), 120.2, 110.8, 108.6 (dq,  $J = 240.9, 33.4$  Hz), 85.8, 61.3, 44.7 (d,  $J = 30.2$  Hz), 14.4. **IR** (film, ATR) 1715, 1592, 1503, 1454, 1369, 1320, 1309, 1275, 1242, 1193, 1167, 1093, 1048, 1007, 943, 861, 779, 742, 705  $\text{cm}^{-1}$ . **HRMS** (EI)  $[\text{M}]^+$  calculated for  $\text{C}_{18}\text{H}_{16}\text{F}_4\text{INO}_3^+$ : 497.01110, found: 497.00907.

### Ethyl 4-((1,1,1,2-tetrafluoro-3-((2-methoxyphenyl)amino)propan-2-yl)oxy)benzoate (18)

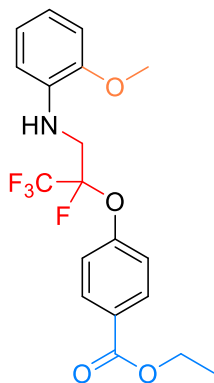

Method A. Using ethyl 4-hydroxybenzoate (49.9 mg, 0.3 mmol), Na<sub>2</sub>CO<sub>3</sub> (31.8 mg, 0.3 mmol), 2-methoxyaniline (68  $\mu$ L, 73.9 mg, 0.6 mmol) and iodonium salt (174.3 mg, 0.36 mmol) in MeCN (3.0 mL).

Yield: 83.6 mg (0.21 mmol, 69%) yellow oil.  $R_f$  = 0.58 in hexane : ethyl acetate 4:1.

**MS** (EI, 70 eV):  $m/z$  (%): 401 (15, [M<sup>+</sup>]), 356 (2), 235 (1), 151 (4), 137 (8), 136 (100), 121 (32), 120 (22), 104 (8), 92 (9), 77 (6), 65 (7). **<sup>1</sup>H NMR** (400 MHz, Chloroform-*d*)  $\delta$  7.92 (d,  $J$  = 8.8 Hz, 2H), 7.14 (d,  $J$  = 8.6 Hz, 2H), 6.72 (td,  $J$  = 7.5, 1.6 Hz, 1H), 6.67 (dd,  $J$  = 8.0, 1.6 Hz, 1H), 6.61 (td,  $J$  = 7.6, 1.6 Hz, 1H), 6.44 (d,  $J$  = 7.7 Hz, 1H), 4.39 (s, 1H), 4.27 (q,  $J$  = 7.1 Hz, 2H), 3.70 (d,  $J$  = 17.5 Hz, 5H), 1.29 (t,  $J$  = 7.2 Hz, 3H). **<sup>19</sup>F NMR** (376 MHz, Chloroform-*d*)  $\delta$  -80.5 (d,  $J$  = 2.9 Hz), -125.2 (q,  $J$  = 2.9 Hz).

**<sup>13</sup>C NMR** (101 MHz, Chloroform-*d*)  $\delta$  165.8, 155.4, 147.0, 136.6, 131.4, 128.1, 121.9 (d,  $J$  = 2.6 Hz), 121.2, 120.6 (qd,  $J$  = 287.9, 37.4 Hz), 118.0, 110.2, 109.9, 109.0 (dq,  $J$  = 240.9, 33.3 Hz), 61.2, 55.6, 44.7 (d,  $J$  = 29.1 Hz), 14.4. **IR** (film, ATR) 1715, 1604, 1521, 1507, 1462, 1275, 1249, 1219, 1193, 1171, 1093, 1048, 1018, 943, 861, 779, 735, 709 cm<sup>-1</sup>. **HRMS** (EI) [M]<sup>+</sup> calculated for C<sub>19</sub>H<sub>19</sub>F<sub>4</sub>NO<sub>4</sub><sup>+</sup>: 401.12502, found: 401.12287.

### Ethyl 4-((1,1,1,2-tetrafluoro-3-(*o*-tolylamino)propan-2-yl)oxy)benzoate (19)

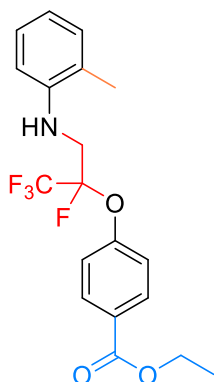

Method A. Using ethyl 4-hydroxybenzoate (49.9 mg, 0.3 mmol), Na<sub>2</sub>CO<sub>3</sub> (31.8 mg, 0.3 mmol), *o*-toluidine (64  $\mu$ L, 64.3 mg, 0.6 mmol) and iodonium salt (174.3 mg, 0.36 mmol) in MeCN (3.0 mL).

Yield: 82.5 mg (0.21 mmol, 71%) yellow oil.  $R_f$  = 0.63 in hexane : ethyl acetate 4:1.

**MS** (EI, 70 eV):  $m/z$  (%): 385 (9, [M<sup>+</sup>]), 340 (2), 151 (3), 121 (13), 120 (100), 118 (7), 104 (7), 92 (5), 91 (15), 77 (4), 65 (5). **<sup>1</sup>H NMR** (400 MHz, Chloroform-*d*)  $\delta$  7.93 (d,  $J$  = 8.8 Hz, 2H), 7.14 (d,  $J$  = 7.8 Hz, 2H), 7.02 – 6.93 (m, 2H), 6.61 (t,  $J$  = 7.4 Hz, 1H), 6.44 (d,  $J$  = 8.1 Hz, 1H), 4.27 (q,  $J$  = 7.1 Hz, 3H), 3.73 (d,  $J$  = 11.2 Hz, 2H), 3.57 (s, 1H), 2.01 (s, 3H), 1.29 (t,  $J$  = 7.2 Hz, 3H). **<sup>19</sup>F NMR** (376 MHz, Chloroform-*d*)  $\delta$  -80.5 (d,  $J$  = 2.8 Hz), -125.0 (q,  $J$  = 2.8 Hz). **<sup>13</sup>C NMR** (101 MHz, Chloroform-*d*)  $\delta$  165.7,

155.4, 144.5, 131.5, 130.5, 128.3, 127.2, 122.6, 121.8 (d,  $J$  = 2.4 Hz), 120.6 (qd,  $J$  = 287.8, 37.2 Hz), 118.5, 110.1, 108.9 (dq,  $J$  = 241.0, 33.2 Hz), 61.3, 44.6 (d,  $J$  = 29.2 Hz), 17.3, 14.4. **IR** (film, ATR) 1715, 1607, 1521, 1503, 1480, 1454, 1369, 1275, 1208, 1193, 1167, 1093, 1048, 1018, 943, 861, 776, 746, 709 cm<sup>-1</sup>. **HRMS** (EI) [M]<sup>+</sup> calculated for C<sub>19</sub>H<sub>19</sub>F<sub>4</sub>NO<sub>3</sub><sup>+</sup>: 385.13011, found: 385.12918.



### Ethyl 4-((1,1,1,2-tetrafluoro-3-(naphthalen-2-ylamino)propan-2-yl)oxy)benzoate (20)

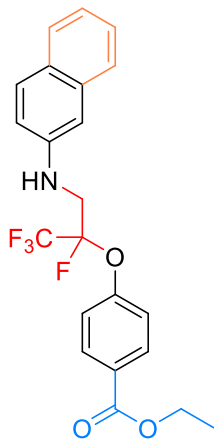

Method A. Using ethyl 4-hydroxybenzoate (49.9 mg, 0.3 mmol), Na<sub>2</sub>CO<sub>3</sub> (31.8 mg, 0.3 mmol), naphthalen-2-amine (85.9 mg, 0.6 mmol) and iodonium salt (174.3 mg, 0.36 mmol) in MeCN (3.0 mL).

Yield: 92.0 mg (0.22 mmol, 73%) red/brown solid. **Mp.** 79-82 °C. **R<sub>f</sub>**= 0.48 in hexane : ethyl acetate 4:1. **MS** (EI, 70 eV): m/z (%): 421 (13, [M<sup>+</sup>]), 157 (12), 156 (100), 151 (4), 129 (8) 128 (11), 127 (14), 121 (5), 115 (11), 104 (6), 76 (3). **<sup>1</sup>H NMR** (400 MHz, Chloroform-*d*) δ 7.89 (d, *J* = 8.5 Hz, 2H), 7.55 (d, *J* = 8.2 Hz, 1H), 7.50 (d, *J* = 8.8 Hz, 1H), 7.45 (d, *J* = 8.3 Hz, 1H), 7.25 (t, *J* = 7.6 Hz, 1H), 7.14 – 7.05 (m, 3H), 6.72 (dd, *J* = 8.8, 2.5 Hz, 1H), 6.63 (d, *J* = 2.6 Hz, 1H), 4.23 (q, *J* = 7.1 Hz, 2H), 3.90 (bs, 1H), 3.84 – 3.69 (m, 2H), 1.25 (t, *J* = 7.2 Hz, 3H). **<sup>19</sup>F NMR** (376 MHz, Chloroform-*d*) δ -80.2 (d, *J* = 2.8 Hz), -125.2 (q, *J* = 2.7 Hz). **<sup>13</sup>C NMR** (101 MHz, Chloroform-*d*) δ 165.7, 155.4, 144.2, 134.9, 131.4, 129.3, 128.2, 128.2, 127.7, 126.6, 126.2, 122.8, 121.8 (d, *J* = 2.5 Hz), 120.6 (qd, *J* = 287.6, 37.5 Hz), 117.6, 108.9 (dq, *J* = 241.1, 33.3 Hz), 105.6, 61.2, 44.9 (d, *J* = 29.0 Hz), 14.4. **IR** (film, ATR) 1712, 1633, 1604, 1529, 1503, 1369, 1275, 1208, 1193, 1171, 1093, 1018, 958, 861, 832, 809, 779, 746, 705 cm<sup>-1</sup>. **HRMS** (EI) [M]<sup>+</sup> calculated for C<sub>22</sub>H<sub>19</sub>F<sub>4</sub>NO<sub>3</sub><sup>+</sup>: 421.13011, found: 421.12765.

### *N*-(2,3,3,3-tetrafluoro-2-phenoxypropyl)aniline (21)

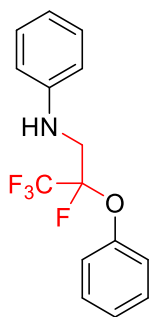

Method A. Using phenol (28.2 mg, 0.3 mmol), Na<sub>2</sub>CO<sub>3</sub> (31.8 mg, 0.3 mmol), aniline (55 μL, 55.9 mg, 0.6 mmol) and iodonium salt (174.3 mg, 0.36 mmol) in MeCN (3.0 mL).

Yield: 58.3 mg (0.19 mmol, 65%) yellow oil. **R<sub>f</sub>**= 0.49 in hexane : ethyl acetate 10:1. **MS** (EI, 70 eV): m/z (%): 299 (10, [M<sup>+</sup>]), 166 (2), 136 (2), 107 (8), 106 (100), 104 (4), 79 (6), 77 (28), 65 (11). **<sup>1</sup>H NMR** (400 MHz, Chloroform-*d*) δ 7.23 (t, *J* = 7.8 Hz, 2H), 7.15 – 7.02 (m, 5H), 6.66 (t, *J* = 7.4 Hz, 1H), 6.48 (d, *J* = 7.9 Hz, 2H), 3.81 – 3.56 (m, 3H). **<sup>19</sup>F NMR** (376 MHz, Chloroform-*d*) δ -80.3 (d, *J* = 2.8 Hz), -124.7 (q, *J* = 2.8 Hz). **<sup>13</sup>C NMR** (101 MHz, Chloroform-*d*) δ 151.7, 146.8, 129.8, 129.4, 126.1, 122.3 (d, *J* = 2.1 Hz), 120.7 (qd, *J* = 287.9, 37.7 Hz), 118.8, 113.3, 108.7 (dq, *J* = 239.1, 32.9 Hz), 44.9 (d, *J* = 29.6 Hz). **IR** (film, ATR) 1604, 1514, 1492, 1443, 1387, 1320, 1257, 1193, 1171, 1096, 1070, 1026, 943, 910, 873, 779, 750, 690 cm<sup>-1</sup>. **HRMS** (EI) [M]<sup>+</sup> calculated for C<sub>15</sub>H<sub>13</sub>F<sub>4</sub>NO<sup>+</sup>: 299.09333, found: 299.09194.

### 4-Iodo-*N*-(2,3,3,3-tetrafluoro-2-phenoxypropyl)aniline (22)

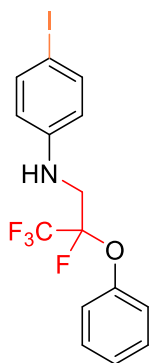

Method A. Using phenol (28.2 mg, 0.3 mmol) Na<sub>2</sub>CO<sub>3</sub> (31.8 mg, 0.3 mmol), 4-iodoaniline (131.4 mg, 0.6 mmol) and iodonium salt (174.3 mg, 0.36 mmol) in MeCN (3.0 mL).

Yield: 65.9 mg (0.15 mmol, 52%) orange/brown oil. **R<sub>f</sub>**= 0.47 in hexane : ethyl acetate 10:1. **MS** (EI, 70 eV): m/z (%): 425 (23, [M<sup>+</sup>]), 131 (1), 298 (2), 272 (2), 233 (8), 232 (100), 136 (3), 106 (8), 105 (51), 104 (14) 91 (11), 78 (8), 77 (29), 76 (12), 65 (10). **<sup>1</sup>H NMR** (400 MHz, Chloroform-*d*) δ 7.32 (d, *J* = 8.8 Hz, 2H), 7.24 (t, *J* = 7.9 Hz, 2H), 7.16 – 7.11 (m, 1H), 7.07 (d, *J* = 8.4 Hz, 2H), 6.26 (d, *J* = 8.8 Hz, 2H), 3.78 – 3.54 (m, 3H). **<sup>19</sup>F NMR** (376 MHz, Chloroform-*d*) δ -80.3 (d, *J* = 3.1 Hz), -124.8 (q, *J* = 2.8 Hz). **<sup>13</sup>C NMR** (101 MHz, Chloroform-*d*) δ 151.6, 146.4, 138.0, 129.8, 126.2, 122.2 (d, *J* = 2.1 Hz), 120.6 (dd, *J* = 287.5, 37.9 Hz), 115.4, 108.5 (dq, *J* = 239.5, 33.1 Hz), 79.6, 44.7 (d, *J* = 29.3 Hz). **IR** (film, ATR) 1592, 1507, 1492, 1387, 1320, 1294, 1253, 1197, 1100, 1026, 1003, 943, 910, 809, 783, 753, 694 cm<sup>-1</sup>. **HRMS** (EI) [M]<sup>+</sup> calculated for C<sub>15</sub>H<sub>12</sub>F<sub>4</sub>INO<sup>+</sup>: 424.98997, found: 424.98755.



### N-(2,3,3,3-Tetrafluoro-2-(4-iodophenoxy)propyl)aniline (23)

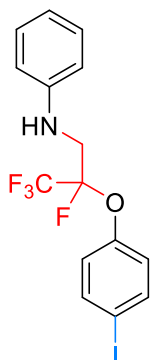

Method A. Using 4-iodophenol (66.0 mg, 0.3 mmol), Na<sub>2</sub>CO<sub>3</sub> (31.8 mg, 0.3 mmol), aniline (55  $\mu$ L, 55.9 mg, 0.6 mmol) and iodonium salt (174.3 mg, 0.36 mmol) in MeCN (3.0 mL).

Yield: 87.2 mg (0.21 mmol, 68%) yellow solid. **Mp.** 43-46 °C. **R<sub>f</sub>** = 0.55 in hexane : ethyl acetate 10:1. **MS** (EI, 70 eV): *m/z* (%): 425 (7, [M<sup>+</sup>]), 219 (1), 203 (6), 191 (2), 136 (2), 107 (8), 106 (100), 92 (4), 77 (14), 65 (7). **<sup>1</sup>H NMR** (400 MHz, Chloroform-*d*)  $\delta$  7.65 (d, *J* = 8.8 Hz, 2H), 7.21 (t, *J* = 8.0 Hz, 2H), 6.96 (d, *J* = 8.2 Hz, 2H), 6.81 (t, *J* = 7.3 Hz, 1H), 6.62 (d, *J* = 7.9 Hz, 2H), 3.88 – 3.71 (m, 3H). **<sup>19</sup>F NMR** (376 MHz, Chloroform-*d*)  $\delta$  -80.0 (d, *J* = 3.0 Hz), -125.7 (q, *J* = 2.9 Hz). **<sup>13</sup>C NMR** (101 MHz, Chloroform-*d*)  $\delta$  151.6, 146.6, 138.8,

129.4, 124.4 (d, *J* = 2.1 Hz), 120.6 (qd, *J* = 288.1, 37.8 Hz), 118.9, 113.3, 108.7 (dq, *J* = 239.9, 33.1 Hz), 90.1, 45.0 (d, *J* = 28.9 Hz). **IR** (film, ATR) 1604, 1514, 1480, 1443, 1391, 1320, 1257, 1193, 1175, 1096, 1074, 1055, 1007, 943, 910, 873, 835, 750, 716, 690 cm<sup>-1</sup>. **HRMS** (EI) [M]<sup>+</sup> calculated for C<sub>15</sub>H<sub>12</sub>F<sub>4</sub>INO<sup>+</sup>: 424.98997, found: 424.98730.

### 1-(4-((2,3,3,3-Tetrafluoro-2-(*p*-tolylloxy)propyl)amino)phenyl)ethan-1-one (24)

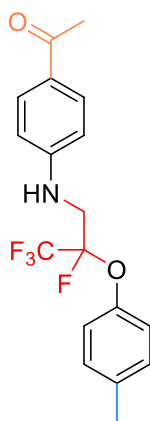

Method A. Using *p*-cresol (31  $\mu$ L, 32.4 mg, 0.3 mmol), Na<sub>2</sub>CO<sub>3</sub> (31.8 mg, 0.3 mmol), 1-(4-aminophenyl)ethan-1-one (81.1 mg, 0.6 mmol) and iodonium salt (174.3 mg, 0.36 mmol) in MeCN (3.0 mL).

Yield: 55.9 mg (0.16 mmol, 52%) yellow solid. **Mp.** 96-99 °C. **R<sub>f</sub>** = 0.51 in hexane : ethyl acetate 2:1. **MS** (EI, 70 eV): *m/z* (%): 355 (14, [M<sup>+</sup>]), 340 (1), 232 (2), 170 (2), 149 (9), 148 (100), 132 (3), 119 (8), 107 (5), 106 (5), 105 (10), 91 (12), 79 (5), 77 (10), 65 (5). **<sup>1</sup>H NMR** (400 MHz, Chloroform-*d*)  $\delta$  7.81 (d, *J* = 8.7 Hz, 2H), 7.12 (d, *J* = 8.2 Hz, 2H), 7.04 (d, *J* = 7.6 Hz, 2H), 6.57 (d, *J* = 8.7 Hz, 2H), 4.39 (s, 1H), 3.90 – 3.72 (m, 2H), 2.49 (s, 3H), 2.32 (s, 3H). **<sup>19</sup>F NMR** (376 MHz, Chloroform-*d*)  $\delta$  -80.3 (d, *J* = 2.7 Hz), -125.0 (q, *J* = 3.0 Hz). **<sup>13</sup>C NMR** (101 MHz, Chloroform-*d*)  $\delta$  196.5, 150.9, 149.2, 136.0, 130.8, 130.3, 128.0, 121.9 (d, *J* = 2.1 Hz), 120.6 (qd, *J* = 287.8, 38.3 Hz), 112.0, 108.3 (dq, *J* = 239.6, 33.0 Hz),

44.1 (d, *J* = 29.4 Hz), 26.1, 20.9. **IR** (film, ATR) 1659, 1600, 1536, 1507, 1424, 1361, 1331, 1275, 1178, 1156, 1100, 1070, 1022, 958, 828 cm<sup>-1</sup>. **HRMS** (EI) [M]<sup>+</sup> calculated for C<sub>18</sub>H<sub>17</sub>F<sub>4</sub>NO<sub>2</sub><sup>+</sup>: 355.11954, found: 355.11801.

### 1-(4-((2-([1,1'-Biphenyl]-2-yloxy)-2,3,3,3-tetrafluoropropyl)amino)phenyl)ethan-1-one (25)

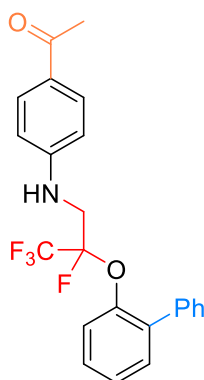

Method A. Using [1,1'-biphenyl]-2-ol (51.1 mg, 0.3 mmol), Na<sub>2</sub>CO<sub>3</sub> (31.8 mg, 0.3 mmol), 1-(4-aminophenyl)ethan-1-one (81.1 mg, 0.6 mmol) and iodonium salt (174.3 mg, 0.36 mmol) in MeCN (3.0 mL).

Yield: 65.6 mg (0.16 mmol, 52%) yellow solid. **Mp.** 89-92 °C. **R<sub>f</sub>** = 0.56 in hexane : ethyl acetate 2:1. **MS** (EI, 70 eV): *m/z* (%): 417 (12, [M<sup>+</sup>]), 201 (3), 169 (6), 152 (10), 149 (10), 48 (100), 141 (6), 119 (9), 115 (7), 105 (8), 91 (6). **<sup>1</sup>H NMR** (400 MHz, Chloroform-*d*)  $\delta$  7.73 (d, *J* = 8.7 Hz, 2H), 7.55 – 7.30 (m, 9H), 6.17 (d, *J* = 8.8 Hz, 2H), 3.62 – 3.49 (m, 2H), 3.46 – 3.33 (m, 1H), 2.47 (s, 3H). **<sup>19</sup>F NMR** (376 MHz, Chloroform-*d*)  $\delta$  -81.0 (d, *J* = 2.9 Hz), -121.1 (q, *J* = 3.1 Hz). **<sup>13</sup>C NMR** (101 MHz, Chloroform-*d*)  $\delta$  196.4, 150.3, 148.1 (d, *J* = 1.7 Hz), 137.0, 135.2 (d, *J* = 1.8 Hz),

131.5, 130.6, 129.8, 129.0, 128.6, 128.1, 127.8, 126.8, 123.3 (d,  $J = 2.4$  Hz), 120.3 (qd,  $J = 287.2$ , 35.6 Hz), 111.7, 108.6 (dq,  $J = 239.9$ , 33.6 Hz), 42.9 (d,  $J = 33.8$  Hz), 26.1. **IR** (film, ATR) 1663, 1600, 1533, 1477, 1432, 1361, 1335, 1272, 1182, 1163, 1093, 1070, 1048, 1011, 955, 906, 824, 776, 761, 738, 701  $\text{cm}^{-1}$ . **HRMS** (EI)  $[M]^+$  calculated for  $\text{C}_{23}\text{H}_{19}\text{F}_4\text{NO}_2^+$ : 417.13519, found: 417.13291.

#### ***N*-(2-(2-Bromo-4-chlorophenoxy)-2,3,3,3-tetrafluoropropyl)-3-iodoaniline (26)**

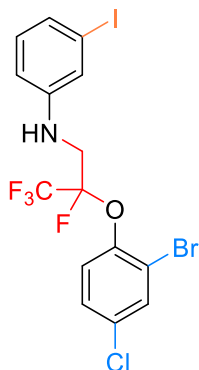

Method A. Using 2-bromo-4-chlorophenol (62.2 mg, 0.3 mmol),  $\text{Na}_2\text{CO}_3$  (31.8 mg, 0.3 mmol), 3-iodoaniline (72  $\mu\text{L}$ , 131.4 mg, 0.6 mmol) and iodonium salt (174.3 mg, 0.36 mmol) in MeCN (3.0 mL).

Yield: 132.1 mg (0.25 mmol, 82%) yellow oil.  $R_f = 0.52$  in hexane : ethyl acetate 10:1.

**MS** (EI, 70 eV):  $m/z$  (%): 541 (2), 539 (9), 537 (6,  $[M^+]$ ), 458 (2), 331 (1), 233 (8), 232 (100), 191 (4), 179 (3), 136 (5), 135 (4), 105 (25), 104 (12), 91 (9), 76 (10).  **$^1\text{H}$  NMR** (400 MHz, Chloroform-*d*)  $\delta$  7.45 (t,  $J = 1.5$  Hz, 1H), 7.16 (t,  $J = 1.5$  Hz, 2H), 6.96 (d,  $J = 7.8$  Hz, 1H), 6.80 – 6.69 (m, 2H), 6.39 (dd,  $J = 8.2$ , 2.5 Hz, 1H), 3.77 – 3.63 (m, 3H).

**$^{19}\text{F}$  NMR** (376 MHz, Chloroform-*d*)  $\delta$  -80.6 (d,  $J = 3.3$  Hz), -123.0 (q,  $J = 3.0$  Hz).

**$^{13}\text{C}$  NMR** (101 MHz, Chloroform-*d*)  $\delta$  147.8 (d,  $J = 1.9$  Hz), 147.4, 133.5, 132.0, 130.8, 128.9, 127.8, 123.7 (d,  $J = 3.2$  Hz), 121.6, 120.3 (qd,  $J = 287.3$ , 36.6 Hz), 116.8 (d,  $J = 2.9$  Hz), 112.5, 109.2 (dq,  $J = 242.2$ , 33.9 Hz), 95.2, 44.0 (d,  $J = 29.1$  Hz). **IR** (film, ATR) 1592, 1510, 1469, 1421, 1384, 1324, 1253, 1231, 1193, 1167, 1141, 1089, 1048, 1022, 984, 947, 917, 869, 847, 824, 764, 742, 682, 660  $\text{cm}^{-1}$ . **HRMS** (EI)  $[M]^+$  calculated for  $\text{C}_{15}\text{H}_{10}\text{BrClF}_4\text{INO}^+$ : 536.86151, found: 536.86097.

#### **2-Bromo-*N*-(2,3,3,3-tetrafluoro-2-(2-iodophenoxy)propyl)aniline (27)**

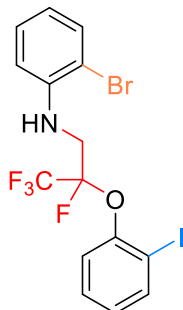

Method A. Using ethyl 2-iodophenol (66.0 mg, 0.3 mmol),  $\text{Na}_2\text{CO}_3$  (31.8 mg, 0.3 mmol), 2-bromoaniline (103.2 mg, 0.6 mmol) and iodonium salt (174.3 mg, 0.36 mmol) in MeCN (3.0 mL).

Yield: 104.5 mg (0.21 mmol, 69%) yellow solid **Mp.** 54-57  $^\circ\text{C}$ .  $R_f = 0.59$  in hexane : ethyl acetate 10:1. **MS** (EI, 70 eV):  $m/z$  (%): 505 (8), 503 (9,  $[M^+]$ ), 378 (4), 376 (4), 358 (3), 356 (2), 203 (12), 186 (96), 184 (100), 157 (4), 155 (4), 136 (6), 135 (12), 109 (5), 105 (24), 104 (15), 92 (15), 91 (18), 78 (99, 77 (28), 76 (24).  **$^1\text{H}$  NMR** (400 MHz, Chloroform-*d*)  $\delta$  7.83 (d,  $J = 8.6$  Hz, 1H), 7.41 (dd,  $J = 7.9$ , 1.6 Hz, 1H), 7.36 – 7.30 (m, 2H), 7.14 (td,  $J = 8.0$ , 1.6 Hz, 1H), 6.99 – 6.90 (m, 1H), 6.62 (td,  $J = 7.6$ , 1.5 Hz, 1H), 6.55 (d,  $J = 8.2$  Hz, 1H), 4.51 (t,  $J = 6.5$  Hz, 1H), 4.05 – 3.80 (m, 2H).

**$^{19}\text{F}$  NMR** (376 MHz, Chloroform-*d*)  $\delta$  -80.6 (d,  $J = 2.8$  Hz), -122.3 (q,  $J = 2.7$  Hz).  **$^{13}\text{C}$  NMR** (101 MHz, Chloroform-*d*)  $\delta$  151.9 (d,  $J = 2.3$  Hz), 143.4, 140.3, 132.7, 129.8, 128.5, 127.4, 122.1 (d,  $J = 3.3$  Hz), 120.4 (qd,  $J = 287.6$ , 36.3 Hz), 119.1, 111.3 (d,  $J = 1.6$  Hz), 110.2, 109.0 (dq,  $J = 242.1$ , 33.6 Hz), 90.3 (d,  $J = 3.1$  Hz), 44.3 (d,  $J = 28.5$  Hz). **IR** (film, ATR) 1600, 1518, 1466, 1439, 1387, 1324, 1283, 1264, 1223, 1197, 1171, 1096, 1044, 1022, 943, 910, 858, 835, 772, 742  $\text{cm}^{-1}$ . **HRMS** (EI)  $[M]^+$  calculated for  $\text{C}_{15}\text{H}_{11}\text{BrF}_4\text{INO}^+$ : 502.90048, found: 502.89846.

### 2-Fluoro-*N*-(2,3,3,3-tetrafluoro-2-(naphthalen-2-yloxy)propyl)aniline (28)

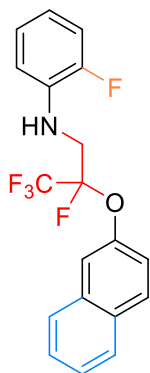

Method A. Using naphthalen-2-ol (43.3 mg, 0.3 mmol), Na<sub>2</sub>CO<sub>3</sub> (31.8 mg, 0.3 mmol), 2-fluoroaniline (58 μL, 66.7 mg, 0.6 mmol) and iodonium salt (174.3 mg, 0.36 mmol) in MeCN (3.0 mL).

Yield: 71.3 mg (0.19 mmol, 65%) yellow oil. *R*<sub>f</sub> = 0.42 in hexane : ethyl acetate 10:1. **MS** (EI, 70 eV): *m/z* (%): 367 (13, [M<sup>+</sup>]), 250 (1), 223 (6), 184 (1), 144 (2), 127 (15), 125 (8), 124 (100), 115 (12), 83 (8), 77 (28). **<sup>1</sup>H NMR** (400 MHz, Chloroform-*d*) δ 7.85 (t, *J* = 8.3 Hz, 2H), 7.81 (d, *J* = 7.5 Hz, 1H), 7.68 (s, 1H), 7.52 (pd, *J* = 7.0, 1.6 Hz, 2H), 7.37 (d, *J* = 9.4 Hz, 1H), 7.05 – 6.92 (m, 2H), 6.73 – 6.61 (m, 2H), 4.19 (s, 1H), 3.96 – 3.78 (m, 2H). **<sup>19</sup>F NMR** (376 MHz, Chloroform-*d*) δ -80.3 (d, *J* = 2.9 Hz), -124.3 (q, *J* = 2.9 Hz), -136.4.

**<sup>13</sup>C NMR** (101 MHz, Chloroform-*d*) δ 151.8 (d, *J* = 238.7 Hz), 149.2, 135.2 (d, *J* = 11.2 Hz),

133.9, 131.6, 130.0, 127.9, 127.8, 127.0, 126.1, 124.6 (d, *J* = 3.6 Hz), 121.6 (d, *J* = 2.3 Hz), 120.8 (qd, *J* = 287.9, 37.6 Hz), 119.2 (d, *J* = 2.3 Hz), 118.2 (d, *J* = 7.0 Hz), 114.9 (d, *J* = 18.6 Hz), 112.6 (d, *J* = 2.9 Hz), 108.9 (dq, *J* = 239.3, 33.1 Hz), 44.5 (d, *J* = 30.1 Hz). **IR** (film, ATR) 1622, 1600, 1525, 1514, 1480, 1458, 1387, 1331, 1298, 1246, 1212, 1175, 1122, 1093, 1033, 966, 917, 888, 861, 817, 738, 690 cm<sup>-1</sup>. **HRMS** (EI) [M]<sup>+</sup> calculated for C<sub>19</sub>H<sub>14</sub>F<sub>5</sub>NO<sup>+</sup>: 367.09956, found: 367.09813.

### 2-Methyl-*N*-(2,3,3,3-tetrafluoro-2-(naphthalen-1-yloxy)propyl)aniline (29)

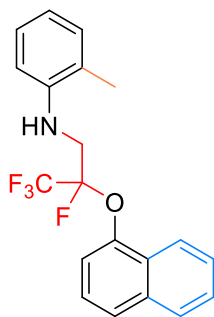

Method A. Using naphthalen-1-ol (43.3 mg, 0.3 mmol), Na<sub>2</sub>CO<sub>3</sub> (31.8 mg, 0.3 mmol), *o*-toluidine (64 μL, 64.3 mg, 0.6 mmol) and iodonium salt (174.3 mg, 0.36 mmol) in MeCN (3.0 mL).

Yield: 69.6 mg (0.19 mmol, 64%) yellow oil. *R*<sub>f</sub> = 0.65 in hexane : ethyl acetate 10:1.

**MS** (EI, 70 eV): *m/z* (%): 363 (15, [M<sup>+</sup>]), 246 (1), 219 (2), 128 (4), 127 (12), 121 (8), 120 (100), 118 (9), 115 (23), 91 (22), 77 (13), 65 (8). **<sup>1</sup>H NMR** (400 MHz, Chloroform-*d*) δ 8.26 (d, *J* = 7.9 Hz, 1H), 7.93 – 7.89 (m, 1H), 7.77 (d, *J* = 7.6 Hz, 1H), 7.61 (qt, *J* = 6.8, 3.5 Hz, 2H), 7.52 – 7.41 (m, 2H), 7.08 (t, *J* = 7.6 Hz, 1H), 7.01 (d, *J* = 7.3 Hz,

1H), 6.70 (t, *J* = 7.4 Hz, 1H), 6.50 (d, *J* = 8.1 Hz, 1H), 4.03 – 3.84 (m, 2H), 3.46 (s, 1H), 1.90 (s, 3H). **<sup>19</sup>F NMR** (376 MHz, Chloroform-*d*) δ -81.1 (d, *J* = 2.4 Hz), -120.5 (q, *J* = 3.0 Hz). **<sup>13</sup>C NMR** (101 MHz, Chloroform-*d*) δ 147.4 (d, *J* = 2.0 Hz), 144.4, 134.9, 130.4, 128.1, 127.5 (d, *J* = 2.1 Hz), 127.1, 127.1, 127.0, 126.0, 125.6, 122.6, 121.5, 121.0 (qd, *J* = 287.1, 36.3 Hz), 118.3, 117.1 (d, *J* = 2.7 Hz), 109.9, 109.5 (dq, *J* = 239.1, 33.4 Hz), 43.6 (d, *J* = 31.8 Hz), 17.1. **IR** (film, ATR) 1607, 1592, 1521, 1480, 1454, 1395, 1320, 1260, 1231, 1186, 1104, 1048, 1014, 865, 802, 776, 746, 712, 690 cm<sup>-1</sup>. **HRMS** (EI) [M]<sup>+</sup> calculated for C<sub>20</sub>H<sub>17</sub>F<sub>4</sub>NO<sup>+</sup>: 363.12463, found: 363.12385.

### 4-((1,1,1,2-Tetrafluoro-3-(methyl(phenyl)amino)propan-2-yl)oxy)benzaldehyde (30)

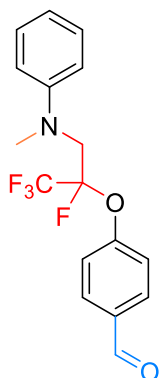

Method A. Using 4-hydroxybenzaldehyde (36.6 mg, 0.3 mmol), Na<sub>2</sub>CO<sub>3</sub> (31.8 mg, 0.3 mmol), *N*-methylaniline (65 μL, 64.3 mg, 0.6 mmol) and iodonium salt (174.3 mg, 0.36 mmol) in MeCN (3.0 mL).

Yield: 58.3 mg (0.17 mmol, 57%) brown oil. *R*<sub>f</sub> = 0.53 in hexane : ethyl acetate 4:1. **MS** (EI, 70 eV): *m/z* (%): 341 (4, [M<sup>+</sup>]), 120 (1), 200 (1), 121 (2), 131 (1), 121 (9), 120 (100), 105 (10), 104 (12), 91 (4), 77 (18). **<sup>1</sup>H NMR** (400 MHz, Chloroform-*d*) δ 9.84 (s, 1H), 7.71 (d, *J* = 8.5 Hz, 2H), 7.20 – 7.09 (m, 4H), 6.76 – 6.64 (m, 3H), 3.94 – 3.81 (m, 2H), 2.94 (s, 3H). **<sup>19</sup>F NMR** (376 MHz, Chloroform-*d*) δ -79.9 (d, *J* = 2.7 Hz), -126.9 (q, *J* = 2.9 Hz).

**<sup>13</sup>C NMR** (101 MHz, Chloroform-*d*) δ 190.9, 157.1, 149.2, 133.7, 131.3, 129.2, 122.3 (d,

$J = 2.9$  Hz), 120.6 (qd,  $J = 289.2, 39.0$  Hz), 118.1, 112.9, 109.9 (dq,  $J = 244.6, 32.5$  Hz), 54.5 (d,  $J = 22.7$  Hz), 40.1 (d,  $J = 1.4$  Hz). **IR** (film, ATR) 1700, 1600, 1503, 1451, 1428, 1372, 1328, 1301, 1268, 1208, 1193, 1163, 1089, 1014, 996, 970, 917, 843, 750, 723, 694  $\text{cm}^{-1}$ . **HRMS** (EI)  $[M]^+$  calculated for  $\text{C}_{17}\text{H}_{15}\text{F}_4\text{NO}_2^+$ : 341.10389, found: 341.10240.

### ***N*-Methyl-*N*-(2,3,3,3-tetrafluoro-2-(2-nitrophenoxy)propyl)aniline (31)**

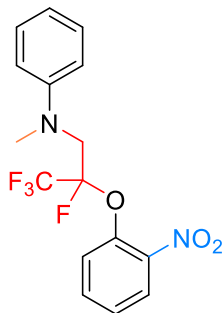

Method A. Using 2-nitrophenol (41.4 mg, 0.3 mmol),  $\text{Na}_2\text{CO}_3$  (31.8 mg, 0.3 mmol), *N*-methylaniline (65  $\mu\text{L}$ , 64.3 mg, 0.6 mmol) and iodonium salt (174.3 mg, 0.36 mmol) in MeCN (3.0 mL).

Yield: 63.6 mg (0.18 mmol, 59%) yellow solid. **Mp.** 58-61  $^\circ\text{C}$ .  $R_f = 0.491$  in hexane : ethyl acetate 4:1. **MS** (EI, 70 eV):  $m/z$  (%): 358 (5,  $[M^+]$ ), 219 (1), 180 (1), 121 (9), 120 (100), 105 (7), 104 (8), 91 (4), 77 (15).  **$^1\text{H}$  NMR** (400 MHz, Chloroform-*d*)  $\delta$  7.91 (dd,  $J = 8.2, 1.8$  Hz, 1H), 7.59 (td,  $J = 8.4, 8.0, 1.7$  Hz, 1H), 7.51 (dt,  $J = 8.0, 1.5$  Hz, 1H), 7.39 – 7.29 (m, 3H), 6.91 – 6.83 (m, 3H), 4.19 (dd,  $J = 16.2, 12.8$  Hz, 1H),

4.09 (dd,  $J = 20.4, 16.2$  Hz, 1H), 3.10 (s, 3H).  **$^{19}\text{F}$  NMR** (376 MHz, Chloroform-*d*)  $\delta$  -80.2 (d,  $J = 2.6$  Hz), -124.8 (q,  $J = 2.8$  Hz).  **$^{13}\text{C}$  NMR** (101 MHz, Chloroform-*d*)  $\delta$  149.1, 145.0, 143.0, 133.8, 129.2, 125.9, 125.5, 124.2 (d,  $J = 3.9$  Hz), 120.3 (qd,  $J = 288.9, 38.5$  Hz), 118.1, 112.9 (d,  $J = 1.4$  Hz), 110.6 (dq,  $J = 246.5, 33.1$  Hz), 54.1 (d,  $J = 21.8$  Hz), 40.2 (d,  $J = 1.5$  Hz). **IR** (film, ATR) 1600, 1533, 1507, 1484, 1451, 1428, 1354, 1268, 1197, 1156, 1085, 1033, 996, 970, 861, 828, 779, 750, 694, 664  $\text{cm}^{-1}$ . **HRMS** (EI)  $[M]^+$  calculated for  $\text{C}_{16}\text{H}_{14}\text{F}_4\text{N}_2\text{O}_3^+$ : 358.09406, found: 358.09211.

### ***N*-(2-(2-Chlorophenoxy)-2,3,3,3-tetrafluoropropyl)-*N*-methylaniline (32)**

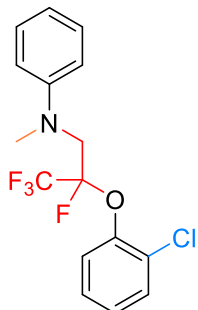

Method A. Using 2-chlorophenol (38.6 mg, 0.3 mmol),  $\text{Na}_2\text{CO}_3$  (31.8 mg, 0.3 mmol), *N*-methylaniline (65  $\mu\text{L}$ , 64.3 mg, 0.6 mmol) and iodonium salt (174.3 mg, 0.36 mmol) in MeCN (3.0 mL).

Yield: 61.6 mg (0.18 mmol, 59%) yellow solid. **Mp.** 33-35  $^\circ\text{C}$ .  $R_f = 0.64$  in hexane : ethyl acetate 10:1. **MS** (EI, 70 eV):  $m/z$  (%): 349 (1), 347 (4,  $[M^+]$ ), 218 (1), 200 (1), 180 (1), 150 (1), 121 (8), 120 (100), 111 (6), 105 (8), 104 (10), 77 (18).  **$^1\text{H}$  NMR** (400 MHz, Chloroform-*d*)  $\delta$  7.31 (dd,  $J = 8.0, 1.8$  Hz, 1H), 7.24 (dt,  $J = 8.2, 2.0$  Hz, 1H), 7.17 – 7.09 (m, 3H), 7.03 (td,  $J = 7.7, 1.6$  Hz, 1H), 6.74 – 6.64 (m, 3H), 3.96 (t,  $J = 15.8$  Hz,

1H), 3.80 (t,  $J = 16.7$  Hz, 1H), 2.93 (s, 3H).  **$^{19}\text{F}$  NMR** (376 MHz, Chloroform-*d*)  $\delta$  -80.2 (d,  $J = 2.6$  Hz), -124.6 (q,  $J = 2.7$  Hz).  **$^{13}\text{C}$  NMR** (101 MHz, Chloroform-*d*)  $\delta$  149.3, 148.3, 130.8, 129.2, 127.8, 127.2 (d,  $J = 2.2$  Hz), 126.6, 123.8 (d,  $J = 3.2$  Hz), 120.7 (qd,  $J = 288.8, 39.1$  Hz), 117.9, 112.8 (d,  $J = 1.6$  Hz), 110.1 (dq,  $J = 244.6, 33.0$  Hz), 54.1 (d,  $J = 22.9$  Hz), 40.1. **IR** (film, ATR) 1600, 1507, 1477, 1447, 1372, 1331, 1264, 1193, 1152, 1130, 1089, 1059, 1033, 996, 970, 839, 776, 750, 712, 690  $\text{cm}^{-1}$ . **HRMS** (EI)  $[M]^+$  calculated for  $\text{C}_{16}\text{H}_{14}\text{ClF}_4\text{NO}^+$ : 347.07000, found: 347.06849.

### Ethyl 4-((1,1,1,2-tetrafluoro-3-(methyl(phenyl)amino)propan-2-yl)oxy)benzoate (33)

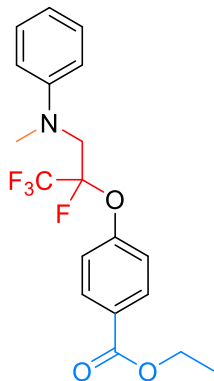

Method A. Using ethyl 4-hydroxybenzoate (49.9 mg, 0.3 mmol), Na<sub>2</sub>CO<sub>3</sub> (31.8 mg, 0.3 mmol), *N*-methylaniline (65 μL, 64.3 mg, 0.6 mmol) and iodonium salt (174.3 mg, 0.36 mmol) in MeCN (3.0 mL).

Yield: 90.4 mg (0.23 mmol, 78%) yellow oil. *R*<sub>f</sub> = 0.69 in hexane : ethyl acetate 4:1.

**MS** (EI, 70 eV): *m/z* (%): 385 (3, [M<sup>+</sup>]), 340 (1), 220 (2), 151 (3), 121 (10), 120 (100), 105 (5), 104 (8), 77 (8). **<sup>1</sup>H NMR** (400 MHz, Chloroform-*d*) δ 7.89 (d, *J* = 8.7 Hz, 2H), 7.15 (t, *J* = 7.8 Hz, 2H), 7.07 (d, *J* = 8.0 Hz, 2H), 6.73 – 6.67 (m, 3H), 4.26 (q, *J* = 7.1 Hz, 2H), 3.96 – 3.75 (m, 2H), 2.93 (s, 3H), 1.28 (t, *J* = 7.2 Hz, 3H). **<sup>19</sup>F NMR** (376 MHz, Chloroform-*d*) δ -79.8 (d, *J* = 2.6 Hz), -126.7 (q, *J* = 2.6 Hz). **<sup>13</sup>C NMR** (101 MHz, Chloroform-*d*) δ 165.8, 155.8, 149.3, 131.2, 129.2, 127.8, 121.7 (d, *J* = 2.9 Hz),

120.7 (qd, *J* = 289.4, 39.3 Hz), 118.0, 112.9, 109.7 (dq, *J* = 243.9, 32.4 Hz), 61.2, 54.5 (d, *J* = 23.0 Hz), 40.0 (d, *J* = 1.5 Hz), 14.4. **IR** (film, ATR) 1719, 1600, 1507, 1369, 1328, 1305, 1275, 1193, 1167, 1152, 1126, 1089, 1018, 996, 970, 861, 832, 779, 750, 694 cm<sup>-1</sup>. **HRMS** (EI) [M]<sup>+</sup> calculated for C<sub>19</sub>H<sub>19</sub>F<sub>4</sub>NO<sub>3</sub><sup>+</sup>: 385.13011, found: 385.12938.

### Ethyl 4-((3-(ethyl(phenyl)amino)-1,1,1,2-tetrafluoropropan-2-yl)oxy)benzoate (34)

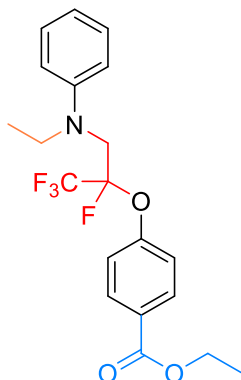

Method A. Using ethyl 4-hydroxybenzoate (49.9 mg, 0.3 mmol), Na<sub>2</sub>CO<sub>3</sub> (31.8 mg, 0.3 mmol), *N*-ethylaniline (76 μL, 72.7 mg, 0.6 mmol) and iodonium salt (174.3 mg, 0.36 mmol) in MeCN (3.0 mL).

Yield: 86.4 mg (0.22 mmol, 72%) yellow oil. *R*<sub>f</sub> = 0.73 in hexane : ethyl acetate 4:1. **MS** (EI, 70 eV): *m/z* (%): 399 (3, [M<sup>+</sup>]), 234 (3), 151 (4), 135 (10), 134 (100), 106 (18), 105 (5), 104 (11), 77 (10). **<sup>1</sup>H NMR** (400 MHz, Chloroform-*d*) δ 7.92 – 7.82 (m, 2H), 7.15 (t, *J* = 8.0 Hz, 2H), 7.07 (d, *J* = 7.6 Hz, 2H), 6.73 (d, *J* = 8.2 Hz, 2H), 6.68 (t, *J* = 7.3 Hz, 1H), 4.27 (q, *J* = 7.1 Hz, 2H), 3.93 – 3.76 (m, 2H), 3.39 (q, *J* = 7.1 Hz, 2H), 1.28 (t, *J* = 7.2 Hz, 3H), 1.06 (t, *J* = 7.0 Hz, 3H). **<sup>19</sup>F NMR** (376 MHz, Chloroform-*d*) δ -79.6 (d, *J* = 2.6 Hz), -127.0 (q, *J* = 2.6 Hz). **<sup>13</sup>C NMR** (101 MHz, Chloroform-*d*) δ 165.9, 156.0, 147.9, 131.2, 129.3, 127.8, 121.7 (d, *J* = 2.7 Hz), 120.8 (qd, *J* = 289.9, 39.8 Hz), 117.8, 113.4 (d, *J* = 1.4 Hz), 109.7 (dq, *J* = 243.7, 32.3 Hz), 61.2, 52.5 (d, *J* = 22.5 Hz), 46.2, 14.4, 11.3. **IR** (film, ATR) 1719, 1600, 1503, 1275, 1193, 1167, 1093, 1018, 999, 861, 779, 746, 694 cm<sup>-1</sup>.

**HRMS** (EI) [M]<sup>+</sup> calculated for C<sub>20</sub>H<sub>21</sub>F<sub>4</sub>NO<sub>3</sub><sup>+</sup>: 399.14576, found: 399.14424.

### Ethyl 4-((1,1,1,2-tetrafluoro-3-(indolin-1-yl)propan-2-yl)oxy)benzoate (35)

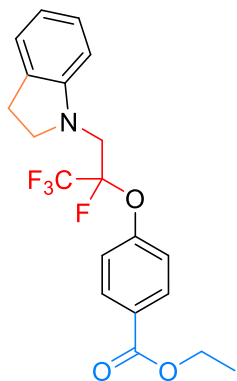

Method A. Using ethyl 4-hydroxybenzoate (49.9 mg, 0.3 mmol), Na<sub>2</sub>CO<sub>3</sub> (31.8 mg, 0.3 mmol), indoline (67 μL, 71.5 mg, 0.6 mmol) and iodonium salt (174.3 mg, 0.36 mmol) in MeCN (3.0 mL).

Yield: 73.9 mg (0.11 mmol, 37%) red oil. *R*<sub>f</sub> = 0.62 in hexane : ethyl acetate 4:1.

**MS** (EI, 70 eV): *m/z* (%): 397 (10, [M<sup>+</sup>]), 352 (2), 232 (4), 151 (3), 133 (11), 132 (100), 130 (11), 117 (16), 104 (8), 91 (9), 77 (6). **<sup>1</sup>H NMR** (400 MHz, Chloroform-*d*) δ 7.93 (d, *J* = 8.9 Hz, 2H), 7.16 (d, *J* = 8.1 Hz, 2H), 6.97 (t, *J* = 8.1 Hz, 2H), 6.62 (t, *J* = 7.4 Hz, 1H), 6.36 (d, *J* = 7.8 Hz, 1H), 4.28 (q, *J* = 7.1 Hz, 2H), 3.76 – 3.50 (m, 2H), 3.46 – 3.31 (m, 2H), 2.89 (t, *J* = 8.5 Hz, 2H), 1.30 (t, *J* = 7.2 Hz, 3H). **<sup>19</sup>F NMR** (376 MHz, Chloroform-*d*) δ -79.9 (d, *J* = 2.6 Hz), -124.7 (q, *J* = 3.0 Hz). **<sup>13</sup>C NMR** (101 MHz, Chloroform-*d*) δ 165.9, 155.9, 151.6, 131.3, 129.1, 127.9, 127.5, 124.7, 121.7 (d, *J* = 2.7 Hz),

120.8 (qd, *J* = 289.9, 39.8 Hz), 117.8, 113.4 (d, *J* = 1.4 Hz), 109.7 (dq, *J* = 243.7, 32.3 Hz), 61.2, 52.5 (d, *J* = 22.5 Hz), 46.2, 14.4, 11.3.

120.6 (qd,  $J = 288.7, 38.7$  Hz), 118.7, 109.4 (dq,  $J = 241.8, 32.4$  Hz), 106.8, 61.2, 55.5, 52.6 (d,  $J = 26.8$  Hz), 28.9, 14.4. **IR** (film, ATR) 1719, 1600, 1503, 1275, 1193, 1167, 1093, 1018, 999, 861, 779, 746, 694  $\text{cm}^{-1}$ . **HRMS** (EI)  $[\text{M}-2\text{H}]^+$  calculated for  $\text{C}_{20}\text{H}_{17}\text{F}_4\text{NO}_3^+$ : 395.11446, found: 395.11362.

#### Ethyl 4-((3-(3,4-dihydroisoquinolin-2(1H)-yl)-1,1,1,2-tetrafluoropropan-2-yl)oxy)benzoate (36)

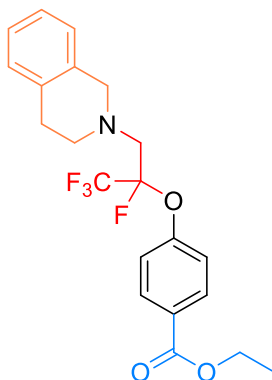

Method A. Using ethyl 4-hydroxybenzoate (49.9 mg, 0.3 mmol),  $\text{Na}_2\text{CO}_3$  (31.8 mg, 0.3 mmol), 1,2,3,4-tetrahydroisoquinoline (75  $\mu\text{L}$ , 79.9 mg, 0.6 mmol) and iodonium salt (174.3 mg, 0.36 mmol) in MeCN (3.0 mL).

Yield: 55.0 mg (0.13 mmol, 45%) yellow oil.  $R_f = 0.59$  in hexane : ethyl acetate 4:1. **MS** (EI, 70 eV):  $m/z$  (%): 411 (0,  $[\text{M}^+]$ ), 366 (1), 262 (1), 246 (2), 183 (2), 147 (12), 146 (100), 131 (5), 130 (5), 117 (7), 115 (4), 105 (4), 104 (11), 103 (5), 91 (3), 78 (4).  **$^1\text{H}$  NMR** (400 MHz, Chloroform- $d$ )  $\delta$  7.92 (d,  $J = 8.8$  Hz, 2H), 7.16 (d,  $J = 8.4$  Hz, 2H), 7.08 – 6.93 (m, 2H), 6.87 – 6.82 (m, 1H), 4.28 (q,  $J = 7.1$  Hz, 2H), 3.64 (s, 2H), 3.07 (p,  $J = 14.7$  Hz, 2H), 2.81 – 2.66 (m, 4H), 1.30 (t,  $J = 7.2$  Hz, 3H).  **$^{19}\text{F}$  NMR** (376 MHz, Chloroform- $d$ )  $\delta$  -80.4 (d,  $J = 2.6$  Hz), -122.5 (q,  $J = 2.1$  Hz).  **$^{13}\text{C}$  NMR** (101 MHz, Chloroform- $d$ )  $\delta$  165.9, 156.1, 134.4, 134.0, 131.3, 128.8, 127.7, 126.5, 126.3, 125.8, 121.7 (d,  $J = 2.7$  Hz), 120.6 (qd,  $J = 287.6, 37.1$  Hz), 109.8 (dq,  $J = 240.5, 32.7$  Hz), 61.2, 57.4 (d,  $J = 26.3$  Hz), 56.7 (d,  $J = 1.5$  Hz), 52.0, 28.9, 14.4. **IR** (film, ATR) 1715, 1604, 1503, 1466, 1451, 1369, 1275, 1197, 1171, 1089, 1018, 940, 861, 779, 746, 709, 682, 668  $\text{cm}^{-1}$ . **HRMS** (EI)  $[\text{M}-\text{H}]^+$  calculated for  $\text{C}_{21}\text{H}_{20}\text{F}_4\text{NO}_3^+$ : 410.13793, found: 410.13699.

#### Ethyl 4-((3-(benzylamino)-1,1,1,2-tetrafluoropropan-2-yl)oxy)benzoate (37)

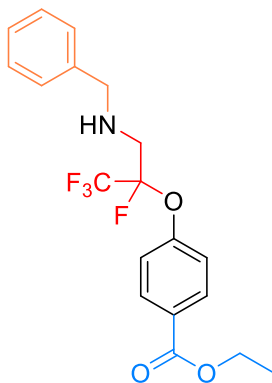

Method A. Using ethyl 4-hydroxybenzoate (49.9 mg, 0.3 mmol),  $\text{Na}_2\text{CO}_3$  (31.8 mg, 0.3 mmol), phenylmethanamine (66  $\mu\text{L}$ , 64.3 mg, 0.6 mmol) and iodonium salt (174.3 mg, 0.36 mmol) in MeCN (3.0 mL).

Yield: 39.5 mg (0.10 mmol, 34%) yellow oil.  $R_f = 0.55$  in hexane : ethyl acetate 4:1. **MS** (EI, 70 eV):  $m/z$  (%): 166 (18), 138 (25), 122 (10), 121 (100), 93 (33), 65 (25), 63 (10).  **$^1\text{H}$  NMR** (400 MHz, Chloroform- $d$ )  $\delta$  7.94 (d,  $J = 8.7$  Hz, 2H), 7.23 – 7.08 (m, 7H), 4.30 (q,  $J = 7.1$  Hz, 2H), 3.72 – 3.62 (m, 2H), 3.18 – 3.03 (m, 2H), 1.54 (bs, 1H), 1.32 (t,  $J = 7.1$  Hz, 3H).  **$^{19}\text{F}$  NMR** (376 MHz, Chloroform- $d$ )  $\delta$  -80.5 (d,  $J = 2.8$  Hz), -122.9 (q,  $J = 3.0$  Hz).  **$^{13}\text{C}$  NMR** (101 MHz, Chloroform- $d$ )  $\delta$  165.9, 155.7, 139.3, 131.3, 128.6, 128.1, 127.9, 127.4, 121.8 (d,  $J = 2.6$  Hz), 120.6 (qd,  $J = 287.4, 37.2$  Hz), 109.5 (dq,  $J = 238.3, 33.0$  Hz), 61.2, 53.7, 48.5 (d,  $J = 28.8$  Hz), 14.4. **IR** (film, ATR) 1715, 1604, 1503, 1454, 1369, 1275, 1193, 1171, 1100, 1059, 1018, 973, 929, 861, 828, 779, 738, 697, 656  $\text{cm}^{-1}$ . **HRMS** (EI)  $[\text{M}-\text{H}]^+$  calculated for  $\text{C}_{19}\text{H}_{18}\text{F}_4\text{NO}_3^+$ : 384.12228, found: 384.12222.



### Ethyl 4-((3-((5-carbamoyl-1-methyl-3-propyl-1H-pyrazol-4-yl)amino)-1,1,1,2-tetrafluoropropan-2-yl)oxy)benzoate (38)

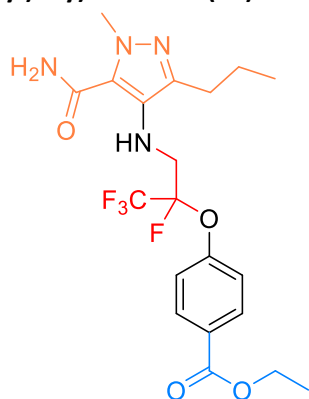

Method A. Using ethyl 4-hydroxybenzoate (49.9 mg, 0.3 mmol), Na<sub>2</sub>CO<sub>3</sub> (31.8 mg, 0.3 mmol), 4-amino-1-methyl-3-propyl-1H-pyrazole-5-carboxamide (109.3 mg, 0.6 mmol) and iodonium salt (174.3 mg, 0.36 mmol) in MeCN (3.0 mL).

Yield: 83.3 mg (0.17 mmol, 58%) pink solid. **Mp.** 97-99 °C. **R<sub>f</sub>**= 0.30 in hexane : ethyl acetate 1:1. **MS** (EI, 70 eV): m/z (%): 460 (14, [M<sup>+</sup>]), 196 (11), 195 (100), 193 (9), 179 (9), 178 (77), 177 (8), 121 (8), 109 (7), 92 (7). **<sup>1</sup>H NMR** (400 MHz, Chloroform-*d*) δ 8.11 (bs, 1H), 8.03 (d, *J* = 8.5 Hz, 2H), 7.23 (d, *J* = 8.4 Hz, 2H), 5.94 (bs, 1H), 4.34 (q, *J* = 7.1 Hz, 2H), 4.06 (s, 3H), 3.62 – 3.34 (m, 2H), 2.97 (t, *J* = 7.4 Hz, 1H), 2.32 (t, *J* = 7.6 Hz, 2H), 1.54 (h, *J* = 7.5 Hz, 2H), 1.35 (t, *J* = 7.2 Hz, 3H), 0.86 (t, *J* = 7.4 Hz, 3H). **<sup>19</sup>F NMR** (376 MHz, Chloroform-*d*) δ -79.8 (d, *J* = 1.7 Hz), -125.5. **<sup>13</sup>C NMR** (101 MHz, Chloroform-*d*) δ 165.5, 161.2, 155.2, 146.6, 131.6, 128.7, 128.5, 126.5, 121.3 (d, *J* = 2.9 Hz), 120.4 (qd, *J* = 288.1, 38.1 Hz), 108.3 (dq, *J* = 240.4, 34.0 Hz), 61.3, 50.9 (d, *J* = 27.0 Hz), 40.1, 27.6, 22.5, 14.3, 14.0. **IR** (film, ATR) 1715, 1678, 1604, 1503, 1462, 1417, 1369, 1275, 1197, 1171, 1100, 1044, 1018, 962, 865, 776, 738, 705 cm<sup>-1</sup>. **HRMS** (ESI) [M+H]<sup>+</sup> calculated for C<sub>20</sub>H<sub>25</sub>F<sub>4</sub>N<sub>4</sub>O<sub>4</sub><sup>+</sup>: 461.1806, found: 461.1808.

### Ethyl 4-((1,1,1,2-tetrafluoro-3-(3-phenyl-1H-pyrazol-1-yl)propan-2-yl)oxy)benzoate (39)

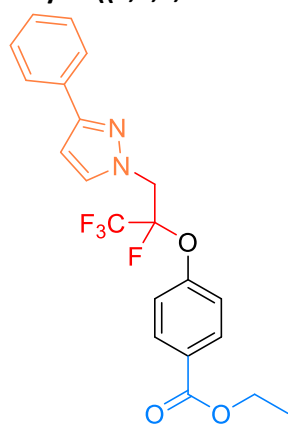

Method A. Using ethyl 4-hydroxybenzoate (49.9 mg, 0.3 mmol), Na<sub>2</sub>CO<sub>3</sub> (31.8 mg, 0.3 mmol), 3-phenyl-1H-pyrazole (86.5 mg, 0.6 mmol) and iodonium salt (174.3 mg, 0.36 mmol) in MeCN (3.0 mL).

Yield: 54.5 mg (0.13 mmol, 43%) yellow oil. **R<sub>f</sub>**= 0.51 in hexane : ethyl acetate 4:1. **MS** (EI, 70 eV): m/z (%): 422 (5, [M<sup>+</sup>]), 377 (8), 354 (5), 353 (22), 325 (4), 307 (11), 306 (64), 305 (100), 277 (13), 257 (8), 157 (46), 151 (7), 130 (17), 128 (12), 115 (12), 104 (21), 103 (14), 92 (7), 89 (10), 77 (42), 76 (13), 65 (8). **<sup>1</sup>H NMR** (400 MHz, Chloroform-*d*) δ 8.01 (d, *J* = 8.8 Hz, 2H), 7.77 (d, *J* = 7.1 Hz, 2H), 7.49 (d, *J* = 2.5 Hz, 1H), 7.40 (t, *J* = 7.6 Hz, 2H), 7.32 (dt, *J* = 7.5, 1.4 Hz, 1H), 7.18 (d, *J* = 8.5 Hz, 2H), 6.60 (d, *J* = 2.5 Hz, 1H), 4.85 (dd, *J* = 15.3, 10.0 Hz, 1H), 4.76 (t, *J* = 15.2 Hz, 1H), 4.35 (q, *J* = 7.2 Hz, 2H), 1.38 (t, *J* = 7.2

Hz, 3H). **<sup>19</sup>F NMR** (376 MHz, Chloroform-*d*) δ -80.2 (d, *J* = 2.7 Hz), -125.2 (q, *J* = 2.9 Hz). **<sup>13</sup>C NMR** (101 MHz, Chloroform-*d*) δ 165.7, 155.1, 152.5, 133.0, 132.5, 131.3, 128.7, 128.3, 128.1, 125.9, 121.9 (d, *J* = 2.5 Hz), 120.1 (qd, *J* = 288.6, 37.5 Hz), 107.2 (dq, *J* = 243.0, 34.0 Hz), 104.4, 61.2, 52.3 (d, *J* = 28.3 Hz), 14.4. **IR** (film, ATR) 1715, 1604, 1503, 1458, 1413, 1365, 1275, 1205, 1167, 1096, 1018, 921, 861, 753, 694 cm<sup>-1</sup>. **HRMS** (ESI) [M+H]<sup>+</sup> calculated for C<sub>21</sub>H<sub>19</sub>F<sub>4</sub>N<sub>2</sub>O<sub>3</sub><sup>+</sup>: 423.1326, found: 423.1333.

#### **N-(2-((2-Bromopyridin-3-yl)oxy)-2,3,3,3-tetrafluoropropyl)-4-iodoaniline (40)**

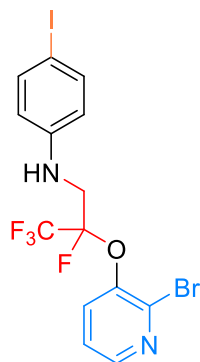

Method A. Using 2-bromopyridin-3-ol (52.2 mg, 0.3 mmol), Na<sub>2</sub>CO<sub>3</sub> (31.8 mg, 0.3 mmol), 4-iodoaniline (131.4 mg, 0.6 mmol) and iodonium salt (174.3 mg, 0.36 mmol) in MeCN (3.0 mL).

Yield: 117.7 mg (0.23 mmol, 78%) brown oil. *R*<sub>f</sub> = 0.58 in hexane : ethyl acetate 2:1.

**MS** (EI, 70 eV): *m/z* (%): 506 (11), 504 (11, [M<sup>+</sup>]), 425 (1), 423 (1), 231 (2), 297 (2), 233 (7), 232 (100), 181 (3), 156 (4), 135 (4), 109 (4), 106 (9), 105 (39), 104 (11), 91 (10), 78 (8), 77 (8), 76 (10). **<sup>1</sup>H NMR** (400 MHz, Chloroform-*d*) δ 8.20 (dd, *J* = 4.6, 1.9 Hz, 1H), 7.58 (dt, *J* = 8.3, 2.0 Hz, 1H), 7.39 (d, *J* = 8.6 Hz, 2H), 7.22 (dd, *J* = 8.2, 4.6 Hz, 1H), 6.36 (d, *J* = 8.4 Hz, 2H), 3.97 (s, 1H), 3.82 (d, *J* = 12.6 Hz, 2H). **<sup>19</sup>F NMR** (376 MHz,

Chloroform-*d*) δ -80.3 (d, *J* = 2.8 Hz), -124.6 (q, *J* = 2.9 Hz). **<sup>13</sup>C NMR** (101 MHz, Chloroform-*d*) δ 146.8, 146.5, 145.9, 137.9, 136.2 (d, *J* = 2.4 Hz), 130.6 (d, *J* = 3.3 Hz), 123.6, 120.2 (qd, *J* = 287.6, 36.5 Hz), 115.3, 109.3 (dq, *J* = 244.0, 34.1 Hz), 79.9, 44.6 (d, *J* = 27.2 Hz). **IR** (film, ATR) 1592, 1566, 1507, 1484, 1447, 1410, 1320, 1246, 1197, 1163, 1093, 1067, 1052, 1018, 943, 914, 809, 768, 738, 720, 694, 668 cm<sup>-1</sup>. **HRMS** (EI) [M]<sup>+</sup> calculated for C<sub>14</sub>H<sub>10</sub>BrF<sub>4</sub>IN<sub>2</sub>O<sup>+</sup>: 503.89573, found: 503.89239.

#### **1-(3-((2,3,3,3-Tetrafluoro-2-((1,1,1,3,3,3-hexafluoropropan-2-yl)oxy)propyl)amino)phenyl)ethan-1-one (41)**

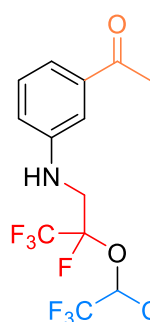

Method A. Using 1,1,1,3,3,3-hexafluoropropan-2-ol (31 μL, 50.4 mg, 0.3 mmol), Na<sub>2</sub>CO<sub>3</sub> (31.8 mg, 0.3 mmol), 1-(3-aminophenyl)ethan-1-one (81.1 mg, 0.6 mmol) and iodonium salt (174.3 mg, 0.36 mmol) in MeCN (3.0 mL).

Yield: 40.7 mg (0.10 mmol, 33%) yellow solid. **Mp.** 65-67 °C. *R*<sub>f</sub> = 0.68 in hexane : ethyl acetate 2:1. **MS** (EI, 70 eV): *m/z* (%): 415 (14, [M<sup>+</sup>]), 396 (2), 376 (2), 267 (1), 151 (2), 149 (9), 148 (100), 106 (9), 105 (10), 104 (10), 91 (12), 77 (7), 76 (7), 69 (10). **<sup>1</sup>H NMR** (400 MHz, Chloroform-*d*) δ 7.41 – 7.33 (m, 1H), 7.32 – 7.26 (m, 2H), 6.88 (dd, *J* = 8.1, 2.7 Hz, 1H), 5.00 (hept, *J* = 5.1 Hz, 1H), 4.09 (s, 1H), 3.98 – 3.68 (m, 2H), 2.57 (s, 3H).

**<sup>19</sup>F NMR** (376 MHz, Chloroform-*d*) δ -73.3 (qq, *J* = 9.1, 4.6 Hz), -73.6 (p, *J* = 9.8 Hz), -81.6 (dp, *J* = 6.8, 2.7 Hz), -136.8 (q, *J* = 10.2 Hz). **<sup>13</sup>C NMR** (101 MHz, Chloroform-*d*) δ 198.4, 146.8, 138.3, 129.7, 120.4 (q, *J* = 282.1 Hz), 120.2 (qd, *J* = 288.1, 38.1 Hz), 119.7, 118.1, 112.3, 108.0 (dq, *J* = 246.6, 33.9 Hz), 70.6 (pd, *J* = 34.5, 6.3 Hz), 45.3 (d, *J* = 21.6 Hz), 26.7. **IR** (film, ATR) 1678, 1607, 1592, 1521, 1492, 1436, 1361, 1331, 1294, 1197, 1178, 1145, 1108, 1011, 977, 940, 899, 880, 783, 738, 723, 686 cm<sup>-1</sup>. **HRMS** (ESI) [M+H]<sup>+</sup> calculated for C<sub>14</sub>H<sub>12</sub>F<sub>4</sub>NO<sub>2</sub><sup>+</sup>: 416.0703, found: 416.0700.

#### **Ethyl 4-((3-bromo-1,1,1,2-tetrafluoropropan-2-yl)oxy)benzoate (42)**

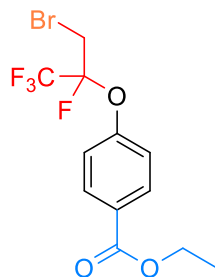

Method A. Using ethyl 4-hydroxybenzoate (49.9 mg, 0.3 mmol), Na<sub>2</sub>CO<sub>3</sub> (63.6 mg, 0.6 mmol), NaBr (61.7 mg, 0.6 mmol) and iodonium salt (174.3 mg, 0.36 mmol) in MeCN (3.0 mL).

Yield: 85.9 mg (0.24 mmol, 80%) colorless oil. *R*<sub>f</sub> = 0.66 in hexane : ethyl acetate 4:1. **MS** (EI, 70 eV): *m/z* (%): 360 (22), 358 (19, [M<sup>+</sup>]), 332 (46), 330 (45), 316 (14), 315 (100), 314 (14), 313 (97), 235 (9), 233 (16), 165 (11), 138 (17), 137 (20), 121 (76), 120 (22), 109 (27), 93 (27), 92 (56), 81 (19), 76 (19), 69 (14), 65 (33), 64 (36), 63 (38), 62 (12). **<sup>1</sup>H NMR** (400 MHz, Chloroform-*d*) δ 7.98 (d, *J* = 8.8 Hz, 2H), 7.21 (d, *J* = 8.8 Hz, 2H), 4.30 (q, *J* = 7.1 Hz, 2H), 3.70 – 3.53 (m, 2H), 1.31 (t, *J* = 7.2 Hz, 3H). **<sup>19</sup>F NMR** (376 MHz, Chloroform-*d*)

δ -79.7 (d, *J* = 2.4 Hz), -116.4 (q, *J* = 2.2 Hz). **<sup>13</sup>C NMR** (101 MHz, Chloroform-*d*) δ 165.7, 154.6, 131.4,



128.6, 122.1 (d,  $J = 2.5$  Hz), 119.9 (qd,  $J = 288.1, 36.9$  Hz), 107.2 (dq,  $J = 239.7, 34.3$  Hz), 61.3, 25.3 (d,  $J = 34.6$  Hz), 14.4. **IR** (film, ATR) 1719, 1607, 1507, 1417, 1369, 1324, 1279, 1212, 1190, 1104, 1063, 1040, 1022, 865, 783, 764, 701  $\text{cm}^{-1}$ . **HRMS** (EI)  $[M]^+$  calculated for  $\text{C}_{12}\text{H}_{11}\text{BrF}_4\text{O}_3^+$ : 357.98277, found: 357.98200.

#### Ethyl 4-((1,1,1,2-tetrafluoro-3-thiocyanatopropan-2-yl)oxy)benzoate (43)

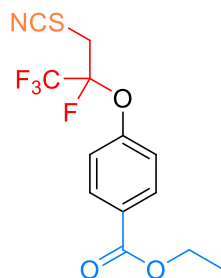

Method A. Using ethyl 4-hydroxybenzoate (49.9 mg, 0.3 mmol),  $\text{Na}_2\text{CO}_3$  (31.8 mg, 0.3 mmol), sodium thiocyanate (48.6 mg, 0.6 mmol) and iodonium salt (174.3 mg, 0.36 mmol) in MeCN (3.0 mL).

Yield: 50.4 mg (0.15 mmol, 50%) yellow oil.  $R_f = 0.43$  in hexane : ethyl acetate 4:1.

**MS** (EI, 70 eV):  $m/z$  (%): 337 (13,  $[M^+]$ ), 310 (6), 309 (40), 293 (14), 292 (100), 233 (8), 138 (10), 122 (10), 121 (46), 120 (42), 109 (17), 93 (15), 92 (39), 91 (9), 76 (14), 69 (7), 65 (13), 64 (19), 63 (15).  **$^1\text{H NMR}$**  (400 MHz, Chloroform- $d$ )  $\delta$  8.00 (d,  $J = 8.8$  Hz, 2H), 7.18 (d,  $J = 8.7$  Hz, 2H), 4.31 (q,  $J = 7.1$  Hz, 2H), 3.60 – 3.43 (m, 2H), 1.32 (t,  $J = 7.1$  Hz, 3H).  **$^{19}\text{F NMR}$**  (376 MHz, Chloroform- $d$ )  $\delta$  -79.1 (d,  $J = 2.8$  Hz), -122.0 (q,  $J = 3.0$  Hz).  **$^{13}\text{C NMR}$**  (101 MHz, Chloroform- $d$ )  $\delta$  165.6, 154.7, 131.6, 128.9, 121.9 (d,  $J = 2.5$  Hz), 120.0 (qd,  $J = 289.5, 39.6$  Hz), 110.3, 107.3 (dq,  $J = 243.0, 34.8$  Hz), 61.4, 35.5 (d,  $J = 27.4$  Hz), 14.4. **IR** (film, ATR) 1715, 1637, 1604, 1503, 1413, 1369, 1335, 1275, 1197, 1171, 1096, 1078, 1052, 1011, 861, 820, 768, 742, 697  $\text{cm}^{-1}$ . **HRMS** (EI)  $[M]^+$  calculated for  $\text{C}_{13}\text{H}_{11}\text{F}_4\text{NO}_3\text{S}^+$ : 337.03958, found: 337.03895.

#### 2-(4-(Ethoxycarbonyl)phenoxy)-2,3,3,3-tetrafluoropropyl 4-nitrobenzoate (44)

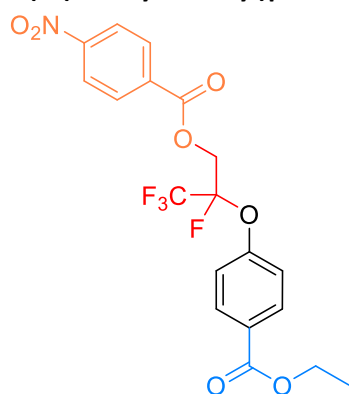

Method A. Using ethyl 4-hydroxybenzoate (49.9 mg, 0.3 mmol),  $\text{Na}_2\text{CO}_3$  (95.4 mg, 0.9 mmol), 4-nitrobenzoic acid (100.3 mg, 0.6 mmol) and iodonium salt (174.3 mg, 0.36 mmol) in MeCN (3.0 mL).

Yield: 81.6 mg (0.18 mmol, 61%) yellow oil.  $R_f = 0.54$  in hexane : ethyl acetate 4:1. **MS** (EI, 70 eV):  $m/z$  (%): 445 (9,  $[M^+]$ ), 417 (10), 401 (10), 400 (20), 281 (10), 280 (100), 264 (5), 251 (9), 234 (14), 222 (6), 150 (39), 134 (9), 121 (19), 120 (25), 104 (42), 93 (11), 92 (30), 76 (26), 75 (10), 65 (8).  **$^1\text{H NMR}$**  (400 MHz, Chloroform- $d$ )  $\delta$  8.22 (d,  $J = 8.9$  Hz, 1H), 8.05 (d,  $J = 8.9$  Hz, 2H), 7.95 (d,  $J = 8.8$  Hz, 2H), 7.16 (d,  $J = 8.4$  Hz, 2H), 4.72 (dd,  $J = 13.0, 6.2$  Hz, 1H), 4.62 (t,  $J = 11.5$  Hz, 1H), 4.28 (q,  $J = 7.1$

Hz, 2H), 1.30 (t,  $J = 7.2$  Hz, 3H).  **$^{19}\text{F NMR}$**  (376 MHz, Chloroform- $d$ )  $\delta$  -81.6 (d,  $J = 2.8$  Hz), -125.5 (q,  $J = 3.0$  Hz).  **$^{13}\text{C NMR}$**  (101 MHz, Chloroform- $d$ )  $\delta$  165.5, 163.1, 154.7 (d,  $J = 1.4$  Hz), 151.1, 133.8, 131.7, 131.1, 128.8, 123.9, 121.7 (d,  $J = 2.4$  Hz), 120.0 (qd,  $J = 286.8, 34.8$  Hz), 107.0 (dq,  $J = 239.8, 35.1$  Hz), 61.4, 60.1 (d,  $J = 37.8$  Hz), 14.4. **IR** (film, ATR) 1742, 1719, 1607, 1533, 1507, 1369, 1350, 1275, 1216, 1100, 1070, 1018, 873, 858, 783, 720  $\text{cm}^{-1}$ . **HRMS** (EI)  $[M]^+$  calculated for  $\text{C}_{19}\text{H}_{15}\text{F}_4\text{NO}_7^+$ : 445.07846, found: 445.07732.

### 3-(2-(4-(Ethoxycarbonyl)phenoxy)-2,3,3,3-tetrafluoropropoxy)-1-oxo-1*H*-isoindole 2-oxide (45)

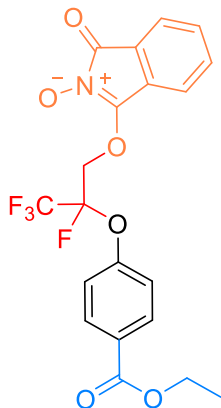

Method A. Using ethyl 4-hydroxybenzoate (49.9 mg, 0.3 mmol), Na<sub>2</sub>CO<sub>3</sub> (63.6 mg, 0.6 mmol), 2-hydroxyisoindoline-1,3-dione (48.9 mg, 0.3 mmol) and iodonium salt (174.3 mg, 0.36 mmol) in MeCN (3.0 mL).

Yield: 51.0 mg (0.12 mmol, 39%) white solid. **Mp.** 108-112 °C. **R<sub>f</sub>**= 0.31 in hexane : ethyl acetate 4:1. **MS** (EI, 70 eV): m/z (%): Compound is not measurable using GC-MS. **<sup>1</sup>H NMR** (400 MHz, Chloroform-*d*) δ 8.21 (d, *J* = 7.6 Hz, 1H), 8.14 (d, *J* = 8.6 Hz, 1H), 7.71 (td, *J* = 7.5, 1.6 Hz, 1H), 7.67 (td, *J* = 7.6, 1.7 Hz, 1H), 7.52 (d, *J* = 7.0 Hz, 1H), 7.31 (d, *J* = 8.6 Hz, 2H), 4.95 (s, 1H), 4.90 (s, 1H), 4.39 (q, *J* = 7.2 Hz, 2H), 1.40 (t, *J* = 7.2 Hz, 3H). **<sup>19</sup>F NMR** (376 MHz, Chloroform-*d*) δ -85.7 (d, *J* = 2.8 Hz), -114.7 (q, *J* = 3.3 Hz). **<sup>13</sup>C NMR** (101 MHz, Chloroform-*d*) δ 178.5, 165.9, 164.0, 154.3, 133.5, 133.5, 131.4, 131.4, 130.8, 128.8, 128.5, 128.4, 121.7, 118.6 (qd, *J* = 281.5, 44.3 Hz), 107.4 (dq, *J* = 271.6, 41.2 Hz), 61.3, 58.4 (d, *J* = 24.3 Hz), 14.4. **IR** (film, ATR) 1712, 1645, 1604, 1581, 1507, 1369, 1309, 1268, 1197, 1163, 1108, 1081, 1059, 1018, 895, 880, 858, 764, 753, 738, 712, 697, 656 cm<sup>-1</sup>. **HRMS** (ESI) [M+NH<sub>4</sub>]<sup>+</sup> calculated for C<sub>20</sub>H<sub>19</sub>F<sub>4</sub>N<sub>2</sub>O<sub>6</sub><sup>+</sup>: 459.1174, found: 459.1179.

### Ethyl 4-((3-(2,4-dinitrophenoxy)-1,1,1,2-tetrafluoropropan-2-yl)oxy)benzoate (46)

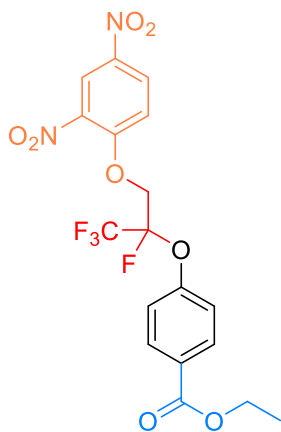

Method A. Using ethyl 4-hydroxybenzoate (49.9 mg, 0.3 mmol), Na<sub>2</sub>CO<sub>3</sub> (95.4 mg, 0.9 mmol), 2,4-dinitrophenol (110.5 mg, 0.6 mmol) and iodonium salt (174.3 mg, 0.36 mmol) in MeCN (3.0 mL).

Yield: 101.0 mg (0.22 mmol, 73%) yellow solid. **Mp.** 72-80 °C. **R<sub>f</sub>**= 0.48 in hexane : ethyl acetate 2:1. **MS** (EI, 70 eV): m/z (%): 462 (14, [M<sup>+</sup>]), 434 (44), 418 (14), 417 (100), 402 (13), 401 (27), 371 (15), 355 (8), 269 (11), 253 (10), 249 (25), 208 (10), 207 (24), 205 (16), 168 (18), 139 (14), 138 (33), 121 (58), 120 (79), 110 (21), 109 (32), 93 (40), 92 (82). **<sup>1</sup>H NMR** (400 MHz, Chloroform-*d*) δ 8.63 (d, *J* = 2.8 Hz, 1H), 8.31 (dd, *J* = 9.2, 2.8 Hz, 1H), 7.92 (d, *J* = 8.8 Hz, 2H), 7.21 (d, *J* = 8.3 Hz, 2H), 7.03 (d, *J* = 9.3 Hz, 1H), 4.54 (dd, *J* = 11.3, 3.9 Hz, 1H), 4.44 (dd, *J* = 11.3, 6.3 Hz, 1H), 4.25 (q, *J* = 7.1 Hz, 2H), 1.28 (t, *J* = 7.2 Hz, 3H). **<sup>19</sup>F NMR** (376 MHz, Chloroform-*d*) δ -81.2 (d, *J* = 3.4 Hz), -124.3 (q, *J* = 3.4 Hz). **<sup>13</sup>C NMR** (101 MHz, Chloroform-*d*) δ 165.5, 154.3, 141.5, 139.4, 131.6, 129.1, 129.0, 122.1 (d, *J* = 2.2 Hz), 122.0, 119.7 (qd, *J* = 287.0, 34.2 Hz), 114.5, 106.7 (dq, *J* = 237.1, 35.3 Hz), 65.0 (d, *J* = 42.4 Hz), 61.4, 14.3. **IR** (film, ATR) 1715, 1607, 1536, 1503, 1462, 1417, 1346, 1279, 1249, 1208, 1182, 1108, 1074, 1044, 1018, 955, 925, 869, 835, 791, 768, 742, 716 cm<sup>-1</sup>. **HRMS** (EI) [M]<sup>+</sup> calculated for C<sub>18</sub>H<sub>14</sub>F<sub>4</sub>N<sub>2</sub>O<sub>8</sub><sup>+</sup>: 462.06863, found: 462.06808.

### Ethyl 4-((1,1,1,2-tetrafluoro-3-(perchlorophenoxy)propan-2-yl)oxy)benzoate (47)

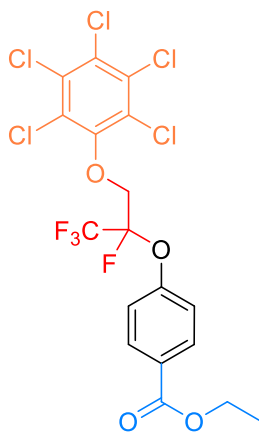

Method A. Using ethyl 4-hydroxybenzoate (49.9 mg, 0.3 mmol), Na<sub>2</sub>CO<sub>3</sub> (95.4 mg, 0.9 mmol), 2,3,4,5,6-pentachlorophenol (159.8 mg, 0.6 mmol) and iodonium salt (174.3 mg, 0.36 mmol) in MeCN (3.0 mL).

Yield: 123.5 mg (0.23 mmol, 76%) yellow oil. **R<sub>f</sub>** = 0.71 in hexane : ethyl acetate 4:1. **MS** (EI, 70 eV): *m/z* (%): 550 (1), 548 (4), 546 (14), 544 (17), 542 (11, [M<sup>+</sup>]), 520 (2), 518 (7), 516 (10), 514 (6), 503 (6), 501 (18), 499 (29), 497 (18), 267 (10), 265 (15), 263 (11), 251 (11), 249 (11), 239 (21), 237 (32), 235 (22), 233 (14), 207 (24), 187 (17), 167 (16), 165 (26), 149 (13), 137 (14), 121 (36), 120 (100), 109 (41), 93 (20), 92 (58). **<sup>1</sup>H NMR** (400 MHz, Chloroform-*d*) δ 7.97 (d, *J* = 8.8 Hz, 2H), 7.23 (d, *J* = 8.3 Hz, 2H), 4.43 (t, *J* = 10.1 Hz, 1H), 4.29 (q, *J* = 7.1 Hz, 2H), 4.22 (dd, *J* = 10.6, 5.2 Hz, 1H), 1.32 (t, *J* = 7.2 Hz, 3H). **<sup>19</sup>F NMR** (376

MHz, Chloroform-*d*) δ -80.9 (d, *J* = 3.3 Hz), -124.9 (q, *J* = 3.4 Hz). **<sup>13</sup>C NMR** (101 MHz, Chloroform-*d*) δ 165.7, 155.2 (d, *J* = 1.5 Hz), 149.4, 132.3, 131.5, 130.8, 128.3, 128.1, 121.5 (d, *J* = 2.7 Hz), 120.0 (qd, *J* = 286.5, 35.0 Hz), 106.8 (dq, *J* = 238.9, 35.4 Hz), 67.2 (d, *J* = 37.8 Hz), 61.3, 14.4. **IR** (film, ATR) 1715, 1641, 1607, 1507, 1410, 1357, 1305, 1275, 1249, 1208, 1178, 1137, 1100, 1048, 1018, 966, 943, 917, 861, 798, 761, 735, 712, 682 cm<sup>-1</sup>. **HRMS** (EI) [M]<sup>+</sup> calculated for C<sub>18</sub>H<sub>11</sub>Cl<sub>5</sub>F<sub>4</sub>O<sub>4</sub><sup>+</sup>: 541.90361, found: 541.90039.

### 2,2'-((2,3,3,3-Tetrafluoropropane-1,2-diyl)bis(oxy))bis(1,3,5-trichlorobenzene) (48)

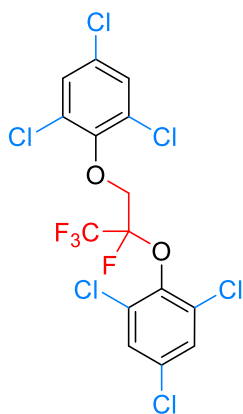

Method A. Using 2,4,6-trichlorophenol (118.5 mg, 0.6 mmol), Na<sub>2</sub>CO<sub>3</sub> (63.6 mg, 0.6 mmol) and iodonium salt (145.2 mg, 0.30 mmol) in MeCN (3.0 mL).

Yield: 107.7 mg (0.21 mmol, 71%) white solid. **Mp.** 89-92 °C. **R<sub>f</sub>** = 0.73 in hexane : ethyl acetate 10:1. **MS** (EI, 70 eV): *m/z* (%): 510 (9), 508 (13), 506 (14), 504 (7, [M<sup>+</sup>]), 313 (8), 311 (25), 309 (30), 276 (6), 274 (8), 231 (4), 229 (8), 227 (10), 211 (10), 201 (7), 200 (22), 199 (33), 198 (70), 197 (100), 196 (78), 194 (99), 181 (13), 179 (14), 171 (29), 169 (90), 167 (91), 145 (11), 143 (15), 111 (10), 109 (40), 107 (34), 99 (20), 97 (67), 96 (12), 86 (11), 83 (14), 74 (16). **<sup>1</sup>H NMR** (400 MHz, Chloroform-*d*) δ 7.28 (s, 2H), 7.17 (s, 2H), 4.40 (dd, *J* = 14.4, 10.9 Hz, 1H), 4.30 (t, *J* = 11.0 Hz, 1H). **<sup>19</sup>F NMR** (376 MHz, Chloroform-*d*) δ -80.8, -120.2. **<sup>13</sup>C NMR** (101 MHz, Chloroform-*d*) δ 148.7, 144.3, 132.4, 131.3 (d, *J* = 1.8 Hz), 131.1,

129.9, 129.5, 129.2, 120.1 (qd, *J* = 287.3, 36.4 Hz), 107.9 (dq, *J* = 248.8, 35.7 Hz), 68.7 (d, *J* = 27.1 Hz). **IR** (film, ATR) 1574, 1559, 1443, 1387, 1339, 1246, 1219, 1197, 1178, 1141, 1108, 1093, 1044, 1003, 947, 925, 858, 817, 802, 776, 727, 709, 694, 660 cm<sup>-1</sup>. **HRMS** (EI) [M]<sup>+</sup> calculated for C<sub>15</sub>H<sub>6</sub>Cl<sub>6</sub>F<sub>4</sub>O<sub>2</sub><sup>+</sup>: 503.84351, found: 503.84371.

#### 4,4'-((2,3,3,3-Tetrafluoropropane-1,2-diyl)bis(oxy))bis(3-nitro-1-(trifluoromethyl)benzene) (49)

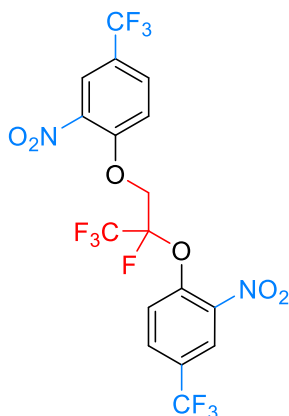

Method A. Using 2-nitro-4-(trifluoromethyl)phenol (84.4  $\mu$ L, 124.3 mg, 0.6 mmol),  $\text{Na}_2\text{CO}_3$  (63.6 mg, 0.6 mmol) and iodonium salt (145.2 mg, 0.30 mmol) in MeCN (3.0 mL).

Yield: 132.2 mg (0.25 mmol, 84%) yellow solid. **Mp.** 85-87  $^\circ\text{C}$ .  $R_f$  = 0.26 in hexane : ethyl acetate 10:1. **MS** (EI, 70 eV):  $m/z$  (%): 526 (2,  $[\text{M}^+]$ ), 507 (11), 436 (1), 320 (18), 319 (11), 290 (6), 207 (89), 204 (9), 191 (43), 190 (70), 177 (22), 174 (22), 163 (17), 162 (28), 160 (41), 148 (22), 147 (81), 146 (50), 141 (17), 132 (51), 127 (23), 126 (100), 125 (11), 120 (18), 113 (21), 107 (23), 101 (13), 95 (15), 81 (10), 75 (27).  **$^1\text{H NMR}$**  (400 MHz, Chloroform- $d$ )  $\delta$  8.13 (s, 1H), 8.05 (s, 1H), 7.90 (d,  $J$  = 7.8 Hz, 1H), 7.82 (d,  $J$  = 7.7 Hz, 1H), 7.68 (d,  $J$  = 8.4 Hz, 1H), 7.21 (d,  $J$  = 8.8 Hz, 1H), 4.84 (dd,  $J$  = 15.7, 11.4 Hz, 1H),

4.71 (dd,  $J$  = 11.3, 7.9 Hz, 1H).  **$^{19}\text{F NMR}$**  (376 MHz, Chloroform- $d$ )  $\delta$  -62.5, -63.0, -81.5 (d,  $J$  = 2.8 Hz), -128.2 (q,  $J$  = 2.8 Hz).  **$^{13}\text{C NMR}$**  (101 MHz, Chloroform- $d$ )  $\delta$  152.3, 146.7, 142.9, 139.9, 131.3 (q,  $J$  = 3.5 Hz), 129.4 (q,  $J$  = 34.9 Hz), 125.7, 125.6, 125.4 (q,  $J$  = 34.8 Hz), 123.7 (q,  $J$  = 3.8 Hz), 123.4 (q,  $J$  = 3.8 Hz), 122.8 (q,  $J$  = 272.1 Hz), 122.5 (q,  $J$  = 272.8 Hz), 119.5 (qd,  $J$  = 287.2, 33.4 Hz), 115.3, 107.7 (dq,  $J$  = 248.8, 35.5 Hz), 66.8 (d,  $J$  = 27.9 Hz). **IR** (film, ATR) 1630, 1544, 1507, 1357, 1324, 1290, 1272, 1238, 1178, 1130, 1093, 1074, 1052, 1014, 955, 899, 847, 820, 682  $\text{cm}^{-1}$ . **HRMS** (EI)  $[\text{M}]^+$  calculated for  $\text{C}_{17}\text{H}_8\text{F}_{10}\text{N}_2\text{O}_6^+$ : 526.02227, found: 526.02225.

#### 3-Fluoro-3-(trifluoromethyl)-2,7,10-trioxa-5-aza-1(1,3),6(1,2)-dibenzenacycloundecaphan-11-one (50)

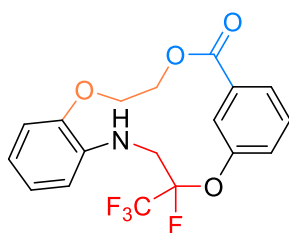

Method A. Using 2-(2-aminophenoxy)ethyl 3-hydroxybenzoate (82.0 mg, 0.3 mmol),  $\text{Na}_2\text{CO}_3$  (31.8 mg, 0.3 mmol) and iodonium salt (174.3 mg, 0.36 mmol) in MeCN (15.0 mL).

Yield: 44.8 mg (0.12 mmol, 39%) white solid. **Mp.** 165-168  $^\circ\text{C}$ .  $R_f$  = 0.37 in hexane : ethyl acetate 4:1. **MS** (EI, 70 eV):  $m/z$  (%): 386 (11), 385 (52,  $[\text{M}^+]$ ), 316 (16), 296 (17), 269 (11), 198 (16), 197 (100), 196 (26), 195 (20), 177 (17), 168 (10), 162 (36), 151 (14), 148 (29), 221 (22), 120 (61), 118 (15), 105 (11), 104 (52), 93 (26), 92 (45), 91 (13), 90 (19), 78 (13), 77 (21), 76 (50), 65 (17), 64 (17), 63 (11).  **$^1\text{H NMR}$**  (400 MHz, DMSO- $d_6$ )  $\delta$  8.54 (s, 1H), 7.78 (d,  $J$  = 7.6 Hz, 1H), 7.56 (t,  $J$  = 7.9 Hz, 1H), 7.41 (dd,  $J$  = 8.3, 2.7 Hz, 1H), 7.02 (d,  $J$  = 8.0 Hz, 1H), 6.86 (t,  $J$  = 7.7 Hz, 1H), 6.68 – 6.57 (m, 2H), 5.42 (t,  $J$  = 6.9 Hz, 1H), 4.70 – 4.52 (m, 2H), 4.45 (dt,  $J$  = 11.8, 3.6 Hz, 1H), 4.18 – 4.02 (m, 2H), 3.80 (td,  $J$  = 16.4, 6.8 Hz, 1H).  **$^{19}\text{F NMR}$**  (376 MHz, DMSO- $d_6$ )  $\delta$  -83.8 (d,  $J$  = 4.2 Hz), -125.6 (q,  $J$  = 4.3 Hz).  **$^{13}\text{C NMR}$**  (101 MHz, DMSO- $d_6$ )  $\delta$  164.9, 151.0, 145.8, 137.4, 131.2, 130.6, 125.2, 124.6, 122.4, 121.4 (d,  $J$  = 2.7 Hz), 120.5 (dd,  $J$  = 286.7, 33.7 Hz), 116.8, 115.4, 109.5, 108.8 (dd,  $J$  = 247.8, 32.5 Hz), 68.3, 63.1, 42.1 (d,  $J$  = 22.2 Hz). **IR** (film, ATR) 1730, 1637, 1604, 1518, 1492, 1451, 1272, 1257, 1216, 1149, 1100, 1078, 1048, 1026, 910, 809, 742  $\text{cm}^{-1}$ . **HRMS** (ESI)  $[\text{M}+\text{H}]^+$  calculated for  $\text{C}_{18}\text{H}_{16}\text{F}_4\text{NO}_4^+$ : 386.10100, found: 526.02225.

## 6. Reactions of phenols with aliphatic amines

### Method B (incorporating aliphatic amines as nucleophile)

Na<sub>2</sub>CO<sub>3</sub> (31.8 mg, 0.3 mmol), phenol (0.3 mmol) and MeCN (3.0 mL) were measured into a screw cap vial. The mixture was stirred at -20°C for 5 minutes and (Z)-(4-fluorophenyl)(2,3,3,3-tetrafluoroprop-1-en-1-yl)iodonium trifluoromethanesulfonate (174.3 mg, 0.36 mmol) was added in one portion. The mixture was stirred at -20°C for 60 minutes then the amine derivative (0.6 mmol) was added. The mixture was stirred at -20°C for further 60 minutes then warmed up to ambient temperature. The solvent was evaporated under reduced pressure to Celite and the crude product was purified by column chromatography using hexanes-ethyl acetate as eluent.

### Ethyl 4-((3-(butylamino)-1,1,1,2-tetrafluoropropan-2-yl)oxy)benzoate (52)

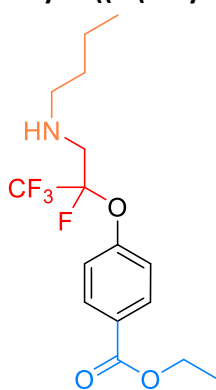

Method B. Using ethyl 4-hydroxybenzoate (49.9 mg, 0.3 mmol), Na<sub>2</sub>CO<sub>3</sub> (31.8 mg, 0.3 mmol), butan-1-amine (59  $\mu$ L, 43.9 mg, 0.6 mmol) and iodonium salt (174.3 mg, 0.36 mmol) in MeCN (3.0 mL).

Yield: 68.1 mg (0.19 mmol, 65%) yellow oil.  $R_f$  = 0.63 in hexane : ethyl acetate 4:1.

**MS** (EI, 70 eV):  $m/z$  (%): 351 (<1, [M<sup>+</sup>]), 308 (8), 306 (8), 259 (3), 231 (2), 216 (3), 215 (4), 187 (27), 167 (4), 159 (6), 132 (14), 124 (9), 121 (29), 109 (9), 104 (9), 87 (20), 86 (100), 76 (10), 65 (11), 57 (10). **<sup>1</sup>H NMR** (400 MHz, Chloroform-*d*)  $\delta$  7.96 (d,  $J$  = 8.7 Hz, 2H), 7.17 (d,  $J$  = 8.3 Hz, 2H), 4.29 (q,  $J$  = 7.1 Hz, 2H), 3.24 – 3.01 (m, 2H), 2.57 – 2.36 (m, 2H), 1.36 – 1.11 (m, 8H), 0.79 (t,  $J$  = 7.3 Hz, 3H). **<sup>19</sup>F NMR** (376 MHz, Chloroform-*d*)  $\delta$  -80.5 (d,  $J$  = 2.8 Hz), -123.5 (q,  $J$  = 2.7 Hz).

**<sup>13</sup>C NMR** (101 MHz, Chloroform-*d*)  $\delta$  165.9, 155.7, 131.3, 127.9, 121.9 (d,  $J$  = 2.5 Hz), 120.6 (dd,  $J$  = 287.5, 37.3 Hz), 109.4 (dq,  $J$  = 239.0, 33.1 Hz), 61.2, 49.7, 49.4 (d,  $J$  = 28.0 Hz), 32.1, 20.2, 14.4, 14.0. **IR** (film, ATR) 1719, 1607, 1507, 1466, 1413, 1369, 1275, 1223, 1193, 1171, 1085, 1018, 929, 865, 779, 768, 709, 682 cm<sup>-1</sup>. **HRMS** (ESI) [M+H]<sup>+</sup> calculated for C<sub>16</sub>H<sub>22</sub>F<sub>4</sub>NO<sub>3</sub><sup>+</sup>: 352.1530, found: 352.1533.

### Ethyl 4-((3-(3-azabicyclo[3.2.2]nonan-3-yl)-1,1,1,2-tetrafluoropropan-2-yl)oxy)benzoate (53)

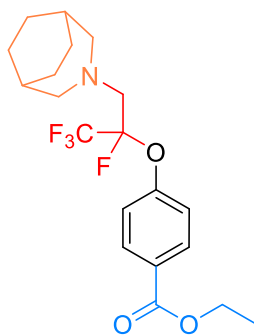

Method B. Using ethyl 4-hydroxybenzoate (49.9 mg, 0.3 mmol), Na<sub>2</sub>CO<sub>3</sub> (31.8 mg, 0.3 mmol), 3-azabicyclo[3.2.2]nonane (53.9 mg, 0.6 mmol) and iodonium salt (174.3 mg, 0.36 mmol) in MeCN (3.0 mL).

Yield: 53.9 mg (0.13 mmol, 45%) white solid. **Mp.** 56-59 °C.  $R_f$  = 0.75 in hexane : ethyl acetate 4:1. **MS** (EI, 70 eV):  $m/z$  (%): 403 (<1, [M<sup>+</sup>]), 358 (2), 322 (1), 238 (2), 151 (1), 139 (11), 138 (100), 67 (5), 58 (14). **<sup>1</sup>H NMR** (400 MHz, Chloroform-*d*)  $\delta$  8.02 (d,  $J$  = 8.7 Hz, 2H), 7.22 (d,  $J$  = 8.4 Hz, 2H), 4.37 (q,  $J$  = 7.1 Hz, 2H), 3.13 – 2.92 (m, 2H), 2.75 – 2.60 (m, 4H), 1.80 (s, 2H), 1.76 – 1.64 (m, 4H), 1.57 – 1.48 (m, 4H), 1.39 (t,  $J$  = 7.1 Hz, 3H). **<sup>19</sup>F NMR** (376 MHz, Chloroform-*d*)  $\delta$  -80.2 (d,  $J$  = 2.7 Hz), -122.9 (q,  $J$  = 2.5 Hz).

**<sup>13</sup>C NMR** (101 MHz, Chloroform-*d*)  $\delta$  166.0, 156.1, 131.3, 127.5, 121.4 (d,  $J$  = 2.9 Hz), 120.7 (qd,  $J$  = 287.9, 37.3 Hz), 110.1 (dq,  $J$  = 241.8, 32.5 Hz), 64.5 (d,  $J$  = 1.6 Hz), 61.2, 58.0 (d,  $J$  = 26.3 Hz), 30.7, 25.6, 25.5, 14.4. **IR** (film, ATR) 1723, 1607, 1507, 1462, 1417, 1369, 1305, 1275, 1227, 1201, 1171, 1108, 1089, 1052, 1022, 984, 858, 779, 709 cm<sup>-1</sup>. **HRMS** (EI) [M+H]<sup>+</sup> calculated for C<sub>20</sub>H<sub>24</sub>F<sub>4</sub>NO<sub>3</sub><sup>+</sup>: 402.16923, found: 402.16679.

#### Ethyl 4-((1,1,1,2-tetrafluoro-3-morpholinopropan-2-yl)oxy)benzoate (54)

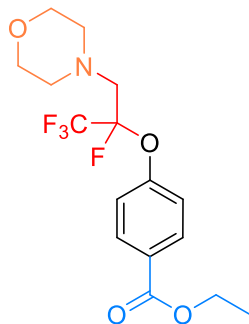

Method B. Using ethyl 4-hydroxybenzoate (49.9 mg, 0.3 mmol), Na<sub>2</sub>CO<sub>3</sub> (31.8 mg, 0.3 mmol), morpholine (53 μL, 52.3 mg, 0.6 mmol) and iodonium salt (174.3 mg, 0.36 mmol) in MeCN (3.0 mL).

Yield: 70.3 mg (0.19 mmol, 64%) yellow oil. *R*<sub>f</sub> = 0.30 in hexane : ethyl acetate 4:1. **MS** (EI, 70 eV): *m/z* (%): 365 (<1, [M<sup>+</sup>]), 320 (3), 262 (1), 238 (1), 210 (1), 200 (7), 151 (5), 121 (3), 104 (9), 101 (18), 100 (100), 92 (5), 76 (5), 72 (5), 70 (10), 56 (11). **<sup>1</sup>H NMR** (400 MHz, Chloroform-*d*) δ 8.01 (d, *J* = 8.7 Hz, 2H), 7.21 (d, *J* = 8.3 Hz, 2H), 4.35 (q, *J* = 7.1 Hz, 2H), 3.55 (d, *J* = 3.3 Hz, 4H), 3.06 – 2.73 (m, 2H), 2.47 (t, *J* = 4.6 Hz, 4H), 1.37 (t, *J* = 7.1 Hz, 3H). **<sup>19</sup>F NMR** (376 MHz, Chloroform-*d*) δ -80.8 (d, *J* = 2.7 Hz), -122.0 (q, *J* = 2.2 Hz). **<sup>13</sup>C NMR** (101 MHz, Chloroform-*d*) δ 165.8, 156.1, 131.2, 127.7, 121.6 (d, *J* = 2.8 Hz), 120.5 (qd, *J* = 287.5, 36.7 Hz), 109.6 (dq, *J* = 241.1, 32.8 Hz), 67.0, 61.2, 58.2 (d, *J* = 26.2 Hz), 54.5, 14.4. **IR** (film, ATR) 1719, 1604, 1507, 1454, 1413, 1369, 1275, 1223, 1197, 1171, 1115, 1085, 1037, 1014, 940, 861, 779, 761, 709 cm<sup>-1</sup>. **HRMS** (EI) [M-2H]<sup>+</sup> calculated for C<sub>16</sub>H<sub>17</sub>F<sub>4</sub>NO<sub>4</sub><sup>+</sup>: 363.10937, found: 363.10913.

#### 1-(2-(4-(Ethoxycarbonyl)phenoxy)-2,3,3,3-tetrafluoropropyl)piperidin-1-ium chloride (55)

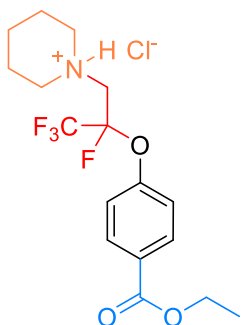

Method B. Using ethyl 4-hydroxybenzoate (49.9 mg, 0.3 mmol), Na<sub>2</sub>CO<sub>3</sub> (31.8 mg, 0.3 mmol), piperidine (59 μL, 51.1 mg, 0.6 mmol) and iodonium salt (174.3 mg, 0.36 mmol) in MeCN (3.0 mL). The product was strongly contaminated after column chromatography. The product was dissolved in dichloromethane and washed with 2M HCl solution. The organic phase was dried over Na<sub>2</sub>SO<sub>4</sub> then filtrated and evaporated. The solid residue was washed three times using pentane. The chloride salt of the pure product was isolated.

Yield: 46.7 mg (0.12 mmol, 39%) brown solid. **Mp.** 210-215 °C sublimate and decomposed. *R*<sub>f</sub> = 0.71 in hexane : ethyl acetate 4:1 for the free amine. **MS** (EI, 70 eV): *m/z* (%): 363 (<1, [M<sup>+</sup>]), 362 (1), 334 (1), 319 (1), 318 (4), 215 (2), 198 (9), 151 (6), 128 (2), 121 (3), 104 (11), 99 (30), 98 (100), 96 (9), 83 (8), 70 (13), 69 (11), 65 (6), 55 (14). **<sup>1</sup>H NMR** (400 MHz, Chloroform-*d*) δ 12.92 (s, 1H), 7.98 (d, *J* = 8.0 Hz, 2H), 7.30 (d, *J* = 8.2 Hz, 2H), 4.30 (q, *J* = 7.1 Hz, 2H), 3.81 – 3.54 (m, 4H), 3.28 (s, 2H), 2.38 (s, 1H), 2.29 (s, 1H), 1.83 (s, 3H), 1.46 (s, 1H), 1.32 (t, *J* = 7.1 Hz, 3H). **<sup>19</sup>F NMR** (376 MHz, Chloroform-*d*) δ -78.0, -119.1. **<sup>13</sup>C NMR** (101 MHz, Chloroform-*d*) δ 165.4, 154.6, 131.4, 128.9, 121.7, 119.3 (dq, *J* = 291.7, 41.7 Hz), 107.4 (qd, *J* = 243.9, 35.0 Hz), 61.3, 56.0 (d, *J* = 21.8 Hz), 54.8 (d, *J* = 14.7 Hz), 22.7, 21.6, 14.3. **IR** (film, ATR) 1719, 1604, 1507, 1458, 1413, 1369, 1279, 1205, 1175, 1104, 1089, 1052, 1022, 1003, 966, 955, 932, 861, 779, 761, 701 cm<sup>-1</sup>. **HRMS** (ESI) [M+H]<sup>+</sup> calculated for C<sub>17</sub>H<sub>22</sub>F<sub>4</sub>NO<sub>3</sub><sup>+</sup>: 364.15303, found: 364.1528.



**1-(2-(4-(Ethoxycarbonyl)phenoxy)-2,3,3,3-tetrafluoropropyl)-4-(pyridin-1-ium-2-yl)piperazine-1,4-diiium trichloride (56)**

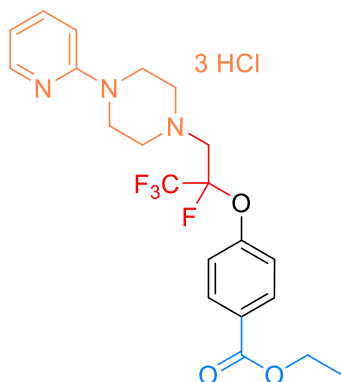

Method B. Using ethyl 4-hydroxybenzoate (49.9 mg, 0.3 mmol), Na<sub>2</sub>CO<sub>3</sub> (31.8 mg, 0.3 mmol), 1-(pyridin-2-yl)piperazine (91 μL, 97.9 mg, 0.6 mmol) and iodonium salt (174.3 mg, 0.36 mmol) in MeCN (3.0 mL). After column chromatography, the product was dissolved in dichloromethane and washed with 2M HCl solution. The organic phase was dried over Na<sub>2</sub>SO<sub>4</sub> then filtrated and evaporated. The chloride salt of the pure product was isolated.

Yield: 104.7 mg (0.19 mmol, 63%) brown oil. *R*<sub>f</sub> = 0.38 in hexane : ethyl acetate 4:1 for the free amine. **MS** (EI, 70 eV): *m/z* (%): 441 (1, [M<sup>+</sup>]), 421 (2), 396 (2), 276 (4), 270 (4), 258 (3), 176 (9), 164 (12), 147 (11), 133 (11), 121 (30), 120 (14), 119 (18), 108 (12), 107 (100), 95 (10), 94 (15), 79 (20), 78 (17). **<sup>1</sup>H NMR** (400 MHz, Chloroform-*d*) δ 8.08 (d, *J* = 4.8 Hz, 1H), 7.96 (d, *J* = 8.3 Hz, 2H), 7.79 (t, *J* = 8.0 Hz, 1H), 7.15 (d, *J* = 8.3 Hz, 2H), 6.93 (d, *J* = 9.0 Hz, 1H), 6.79 (t, *J* = 6.5 Hz, 1H), 5.24 (s, 3H), 4.29 (q, *J* = 7.1 Hz, 2H), 3.73 – 3.70 (m, 4H), 2.99 (p, *J* = 14.7 Hz, 2H), 2.69 (s, 4H), 1.32 (t, *J* = 7.1 Hz, 3H). **<sup>19</sup>F NMR** (376 MHz, Chloroform-*d*) δ -80.3, -122.5. **<sup>13</sup>C NMR** (101 MHz, Chloroform-*d*) δ 165.6, 155.7, 152.2, 143.6, 138.5, 131.2, 127.7, 121.4 (d, *J* = 2.6 Hz), 120.2 (qd, *J* = 288.2, 36.9 Hz), 112.6, 111.3, 109.2 (dq, *J* = 241.3, 33.0 Hz), 61.1, 57.3 (d, *J* = 26.2 Hz), 53.5, 53.0, 47.0, 14.2. **IR** (film, ATR) 1715, 1637, 1604, 1540, 1503, 1466, 1439, 1369, 1309, 1275, 1193, 1171, 1085, 1052, 1018, 996, 936, 861, 764, 709 cm<sup>-1</sup>. **HRMS** (EI) [M]<sup>+</sup> calculated for C<sub>21</sub>H<sub>23</sub>F<sub>4</sub>N<sub>3</sub>O<sub>3</sub><sup>+</sup>: 441.16755, found: 441.16573.

**Ethyl 4-((1,1,1,2-tetrafluoro-3-(methyl(naphthalen-1-ylmethyl)amino)propan-2-yl)oxy)benzoate (57)**

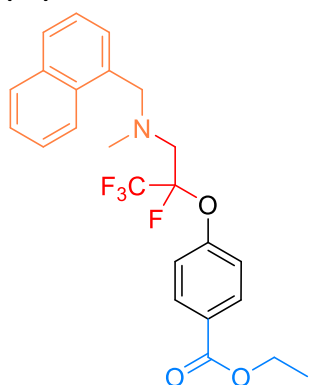

Method B. Using ethyl 4-hydroxybenzoate (49.9 mg, 0.3 mmol), Na<sub>2</sub>CO<sub>3</sub> (31.8 mg, 0.3 mmol), *N*-methyl-1-(naphthalen-1-yl)methanamine (99 μL, 102.7 mg, 0.6 mmol) and iodonium salt (174.3 mg, 0.36 mmol) in MeCN (3.0 mL).

Yield: 84.0 mg (0.19 mmol, 62%) yellow oil. *R*<sub>f</sub> = 0.57 in hexane : ethyl acetate 4:1. **MS** (EI, 70 eV): *m/z* (%): 449 (<1, [M<sup>+</sup>]), 404 (2), 262 (1), 244 (1), 215 (1), 185 (17), 184 (100), 168 (6), 142 (37), 141 (100), 139 (10), 115 (50), 104 (10), 76 (7), 65 (6). **<sup>1</sup>H NMR** (400 MHz, Chloroform-*d*) δ 8.32 – 8.25 (m, 1H), 8.02 (d, *J* = 8.9 Hz, 2H), 7.89 – 7.76 (m, 2H), 7.49 (dd, *J* = 6.6, 3.1 Hz, 2H), 7.44 – 7.37 (m, 2H), 7.21 (d, *J* = 7.9 Hz, 2H), 4.39 (q, *J* = 7.1 Hz, 2H), 4.07 (s, 2H), 3.32 – 3.10 (m, 2H), 2.36 (s, 3H), 1.41 (t, *J* = 7.2 Hz, 3H). **<sup>19</sup>F NMR** (376 MHz, Chloroform-*d*) δ -79.9 (d, *J* = 2.0 Hz), -123.4 (q, *J* = 2.1 Hz). **<sup>13</sup>C NMR** (101 MHz, Chloroform-*d*) δ 165.9, 155.9, 134.0, 133.9, 132.4, 131.3, 128.5, 128.4, 127.6, 127.5, 125.9, 125.8, 125.2, 124.7, 121.6 (d, *J* = 2.7 Hz), 120.6 (qd, *J* = 288.5, 38.1 Hz), 110.0 (dq, *J* = 241.3, 32.3 Hz), 61.8, 61.2, 57.6 (d, *J* = 25.1 Hz), 43.6 (d, *J* = 1.9 Hz), 14.4. **IR** (film, ATR) 1715, 1604, 1507, 1462, 1413, 1369, 1275, 1193, 1167, 1085, 1055, 1018, 973, 858, 794, 776, 735, 709 cm<sup>-1</sup>. **HRMS** (EI) [M-C<sub>2</sub>H<sub>5</sub>O]<sup>+</sup> calculated for C<sub>22</sub>H<sub>18</sub>F<sub>4</sub>NO<sub>2</sub><sup>+</sup>: 404.12737, found: 404.12493.

***tert*-Butyl 3-((2-(4-(ethoxycarbonyl)phenoxy)-2,3,3,3-tetrafluoropropyl)(phenethyl)amino)azetidine-1-carboxylate (58)**

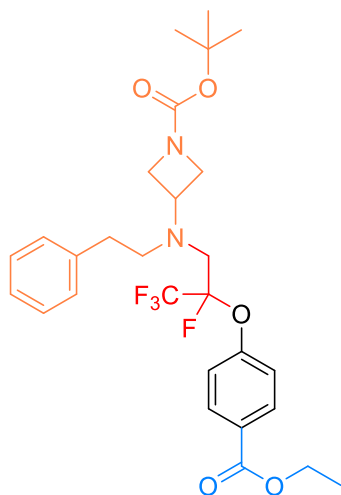

Method B. Using ethyl 4-hydroxybenzoate (49.9 mg, 0.3 mmol), Na<sub>2</sub>CO<sub>3</sub> (31.8 mg, 0.3 mmol), *tert*-butyl 3-(phenethylamino)azetidine-1-carboxylate (131.9 mg, 0.48 mmol) and iodonium salt (174.3 mg, 0.36 mmol) in MeCN (3.0 mL).

Yield: 58.7 mg (0.11 mmol, 35%) yellow oil. *R*<sub>f</sub> = 0.36 in hexane : ethyl acetate 4:1. **MS** (EI, 70 eV): *m/z* (%): Compound is not measurable using GC-MS. **<sup>1</sup>H NMR** (400 MHz, Chloroform-*d*) δ 7.95 (d, *J* = 8.7 Hz, 2H), 7.22 – 7.17 (m, 2H), 7.15 – 7.09 (m, 3H), 7.08 – 7.00 (m, 2H), 4.29 (q, *J* = 7.1 Hz, 2H), 3.88 (q, *J* = 7.9 Hz, 2H), 3.82 – 3.68 (m, 3H), 3.29 – 3.12 (m, 2H), 3.00 – 2.85 (m, 2H), 2.72 – 2.60 (m, 2H), 1.35 (s, 9H), 1.31 (t, *J* = 7.2 Hz, 3H). **<sup>19</sup>F NMR** (376 MHz, Chloroform-*d*) δ -80.5 (d, *J* = 2.8 Hz), -122.9 (q, *J* = 2.9 Hz). **<sup>13</sup>C NMR** (101 MHz, Chloroform-*d*) δ 165.9, 155.6, 139.2, 131.3, 128.6, 128.0, 127.9, 127.4, 121.8 (d, *J* = 2.6 Hz), 120.6 (qd, *J* =

287.4, 37.1 Hz), 109.5 (dq, *J* = 238.7, 33.3 Hz), 61.2, 53.6, 48.4 (d, *J* = 28.9 Hz), 14.4. **IR** (film, ATR) 1700, 1604, 1503, 1480, 1410, 1391, 1369, 1275, 1193, 1167, 1126, 1089, 1018, 929, 861, 776, 753, 701 cm<sup>-1</sup>. **HRMS** (ESI) [M+H]<sup>+</sup> calculated for C<sub>28</sub>H<sub>35</sub>F<sub>4</sub>N<sub>2</sub>O<sub>5</sub><sup>+</sup>: 555.2477, found: 555.2478.

## 7. Unsuccessful attempts and selectivity

### 7.1 Reaction of amine and iodonium salt

4-iodoaniline (43.8 mg, 0.2 mmol), Na<sub>2</sub>CO<sub>3</sub> (21.2 mg, 1 equiv, 0.2 mmol), and (*Z*)-(4-fluorophenyl)(2,3,3,3-tetrafluoroprop-1-en-1-yl)iodonium trifluoromethanesulfonate (96.8 mg, 1 equiv, 0.2 mmol) were measured into a screw cap vial and dissolved in MeCN (2 mL). The mixture was stirred at ambient temperature for 1 hour then analyzed by GC-MS and <sup>19</sup>F NMR. No reaction occurred. Based on the GC-MS measurement, the aniline derivative remained in the reaction mixture. Based on <sup>19</sup>F NMR measurement, the iodonium salt was decomposed.

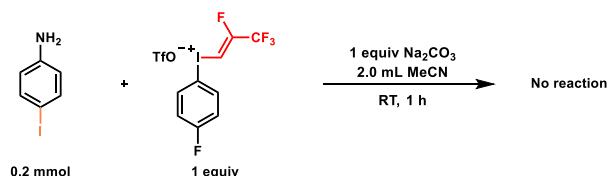



## 7.2 Heterodisubstitution

Phenol derivative (0.05 mmol), Na<sub>2</sub>CO<sub>3</sub> (1 equiv, 0.05 mmol), "second" nucleophile (2 equiv, 0.1 mmol) and MeCN (0.5 mL) were measured into a screw cap vial. The mixture was stirred at ambient temperature for 5 minutes and (Z)-(4-fluorophenyl)(2,3,3,3-tetrafluoroprop-1-en-1-yl)iodonium trifluoromethanesulfonate (1.2 equiv, 0.06 mmol) was added in one portion. The mixture was stirred at ambient temperature for 1 hour then analyzed by GC-MS and TLC.

In the following cases, the desired products formed in low conversions or not detected at all. The product formed in low amount in the cases of heteroaromatic compounds despite the high GC-MS conversions (ionization problems).

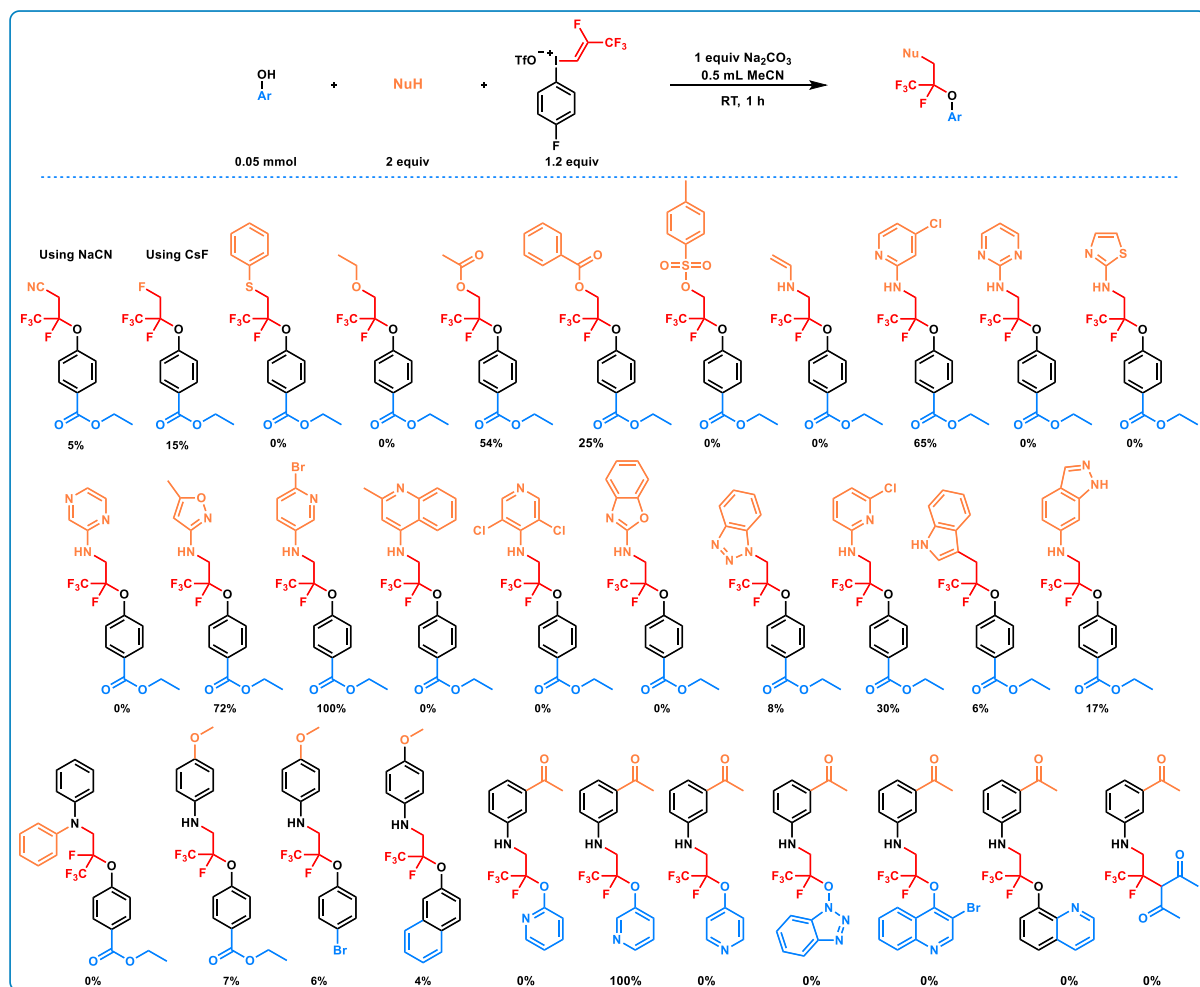

In the following cases, homodifunctionalized products were identified by GC-MS.

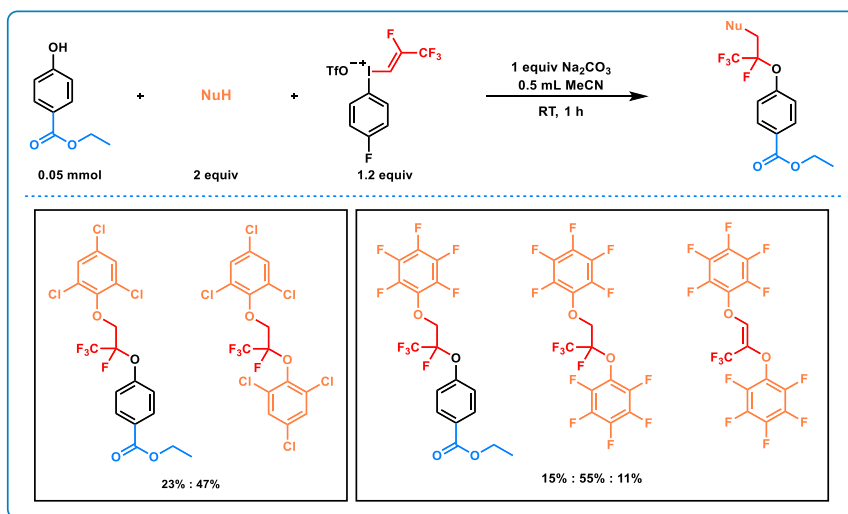

### 7.3 Homodisubstitution

Phenol derivative (2 equiv, 0.1 mmol),  $Na_2CO_3$  (2 equiv, 0.1 mmol) and MeCN (0.5 mL) were measured into a screw cap vial. The mixture was stirred at ambient temperature for 5 minutes and (Z)-(4-fluorophenyl)(2,3,3,3-tetrafluoroprop-1-en-1-yl)iodonium trifluoromethanesulfonate (1 equiv, 0.05 mmol) was added in one portion. The mixture was stirred at ambient temperature for 1 hour then analyzed by GC-MS and TLC.

In the following cases, several side products were identified by GC-MS and the ratio of the two products is shown.

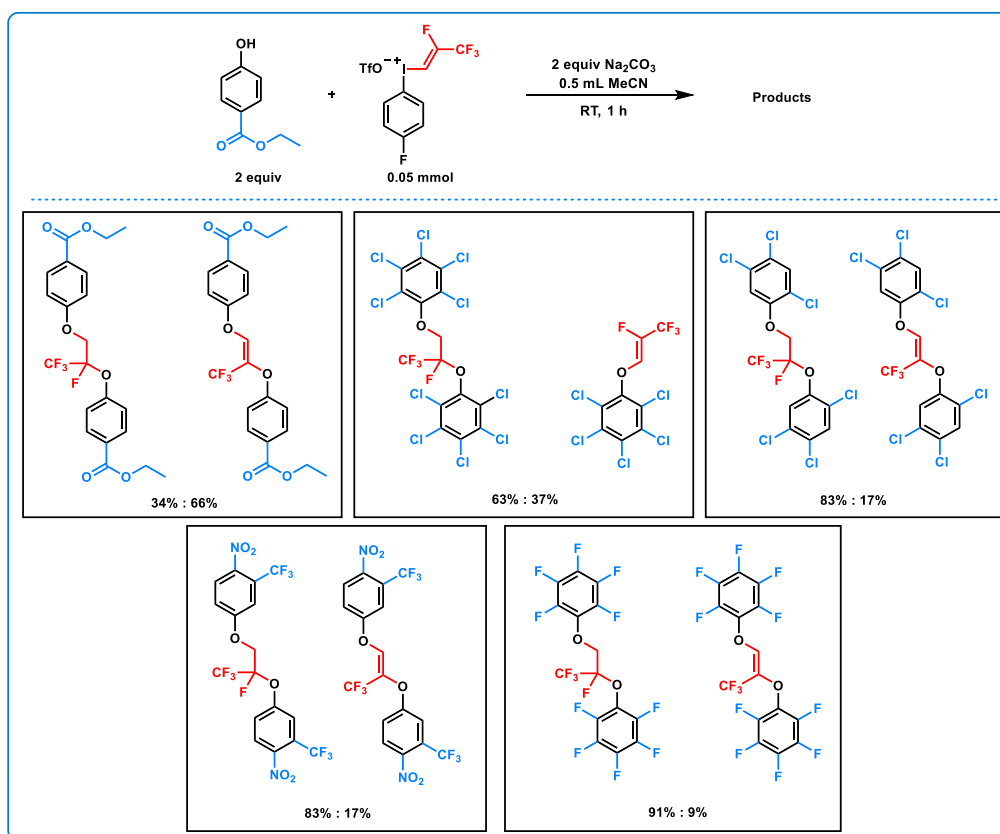

## 8. Proposed mechanism

Reasonable pathways for the formation of identified products and side products

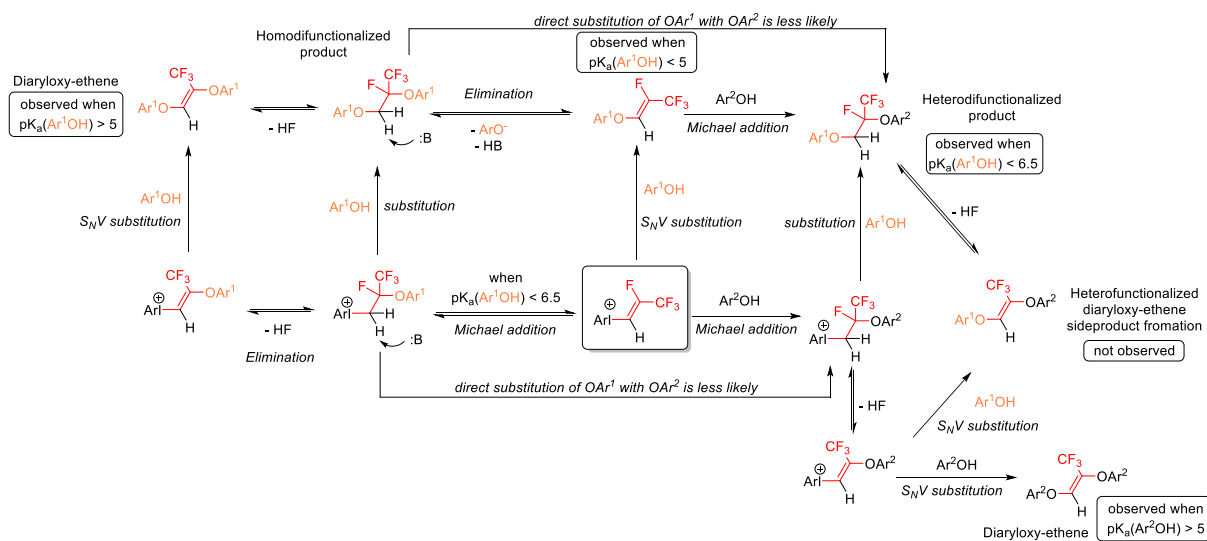

## 9. References

- [1] Umemoto, T.; Gotoh, Y., Synthesis, Properties, and Reactivity of (1*H*,1*H*-Perfluoroalkyl)- and (1*H*-Perfluoro-1-alkenyl)aryliodonium Triflates and Their Analogs. *Bulletin of the Chemical Society of Japan* **1987**, *60* (9), 3307-3313.
- [2] Tóth, B. L.; Sályi, G.; Domján, A.; Egyed, O.; Bényei, A.; Gonda, Z.; Novák, Z., Z-Selective Fluoroalkenylation of (Hetero)Aromatic Systems by Iodonium Reagents in Palladium-Catalyzed Directed C–H Activation. *Advanced Synthesis & Catalysis* **2022**, *364* (2), 348-354.
- [3] Varga, B.; Tóth, B. L.; Béke, F.; Csenki, J. T.; Kotschy, A.; Novák, Z., Synthesis and Photochemical Application of Hydrofluoroolefin (HFO) Based Fluoroalkyl Building Block. *Organic Letters* **2021**, *23* (12), 4925-4929.
- [4] Csenki, J. T.; Tóth, B. L.; Béke, F.; Varga, B.; P. Fehér, P.; Stirling, A.; Czégény, Z.; Bényei, A.; Novák, Z., Synthesis of Hydrofluoroolefin-Based Iodonium Reagent via Dyotropic Rearrangement and Its Utilization in Fluoroalkylation. *Angewandte Chemie International Edition* **2022**, *61* (37), e202208420.
- [5] Jung, M. E.; Koch, P., Mild, selective deprotection of PMB ethers with triflic acid/1,3-dimethoxybenzene. *Tetrahedron Letters* **2011**, *52* (46), 6051-6054.
- [6] Papageorgiou, G.; Corrie, J. E. T. Synthesis and Photolytic Assessment of Nitroindolinyl-Caged Calcium Ion Chelators *Molecules* [Online], 2022.
- [7] Misal Castro, L. C.; Obata, A.; Aihara, Y.; Chatani, N., Chelation-Assisted Nickel-Catalyzed Oxidative Annulation via Double C–H Activation/Alkyne Insertion Reaction. *Chemistry – A European Journal* **2016**, *22* (4), 1362-1367.
- [8] Turrado, C.; Puig, T.; García-Cárceles, J.; Artola, M.; Benhamú, B.; Ortega-Gutiérrez, S.; Relat, J.; Oliveras, G.; Blancafort, A.; Haro, D.; Marrero, P. F.; Colomer, R.; López-Rodríguez, M. L., New Synthetic Inhibitors of Fatty Acid Synthase with Anticancer Activity. *Journal of Medicinal Chemistry* **2012**, *55* (11), 5013-5023.
- [9] Béchamp, A., Bechamp reduction. *Annales de Chimie et de Physique* **1854**, *42*, 186.
- [10] Zhang, W.-W.; Gao, T.-T.; Xu, L.-J.; Li, B.-J., Macrolactonization of Alkynyl Alcohol through Rh(I)/Yb(III) Catalysis. *Organic Letters* **2018**, *20* (20), 6534-6538.

## 10. NMR spectra

$^1\text{H}$  NMR (400 MHz,  $\text{DMSO-}d_6$ )  $\delta$  4.55 (dd,  $J = 19.0, 13.5$  Hz, 1H), 4.39 (dd,  $J = 19.5, 13.5$  Hz, 1H).

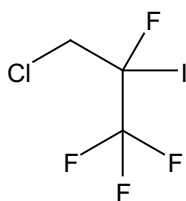

**(2)**

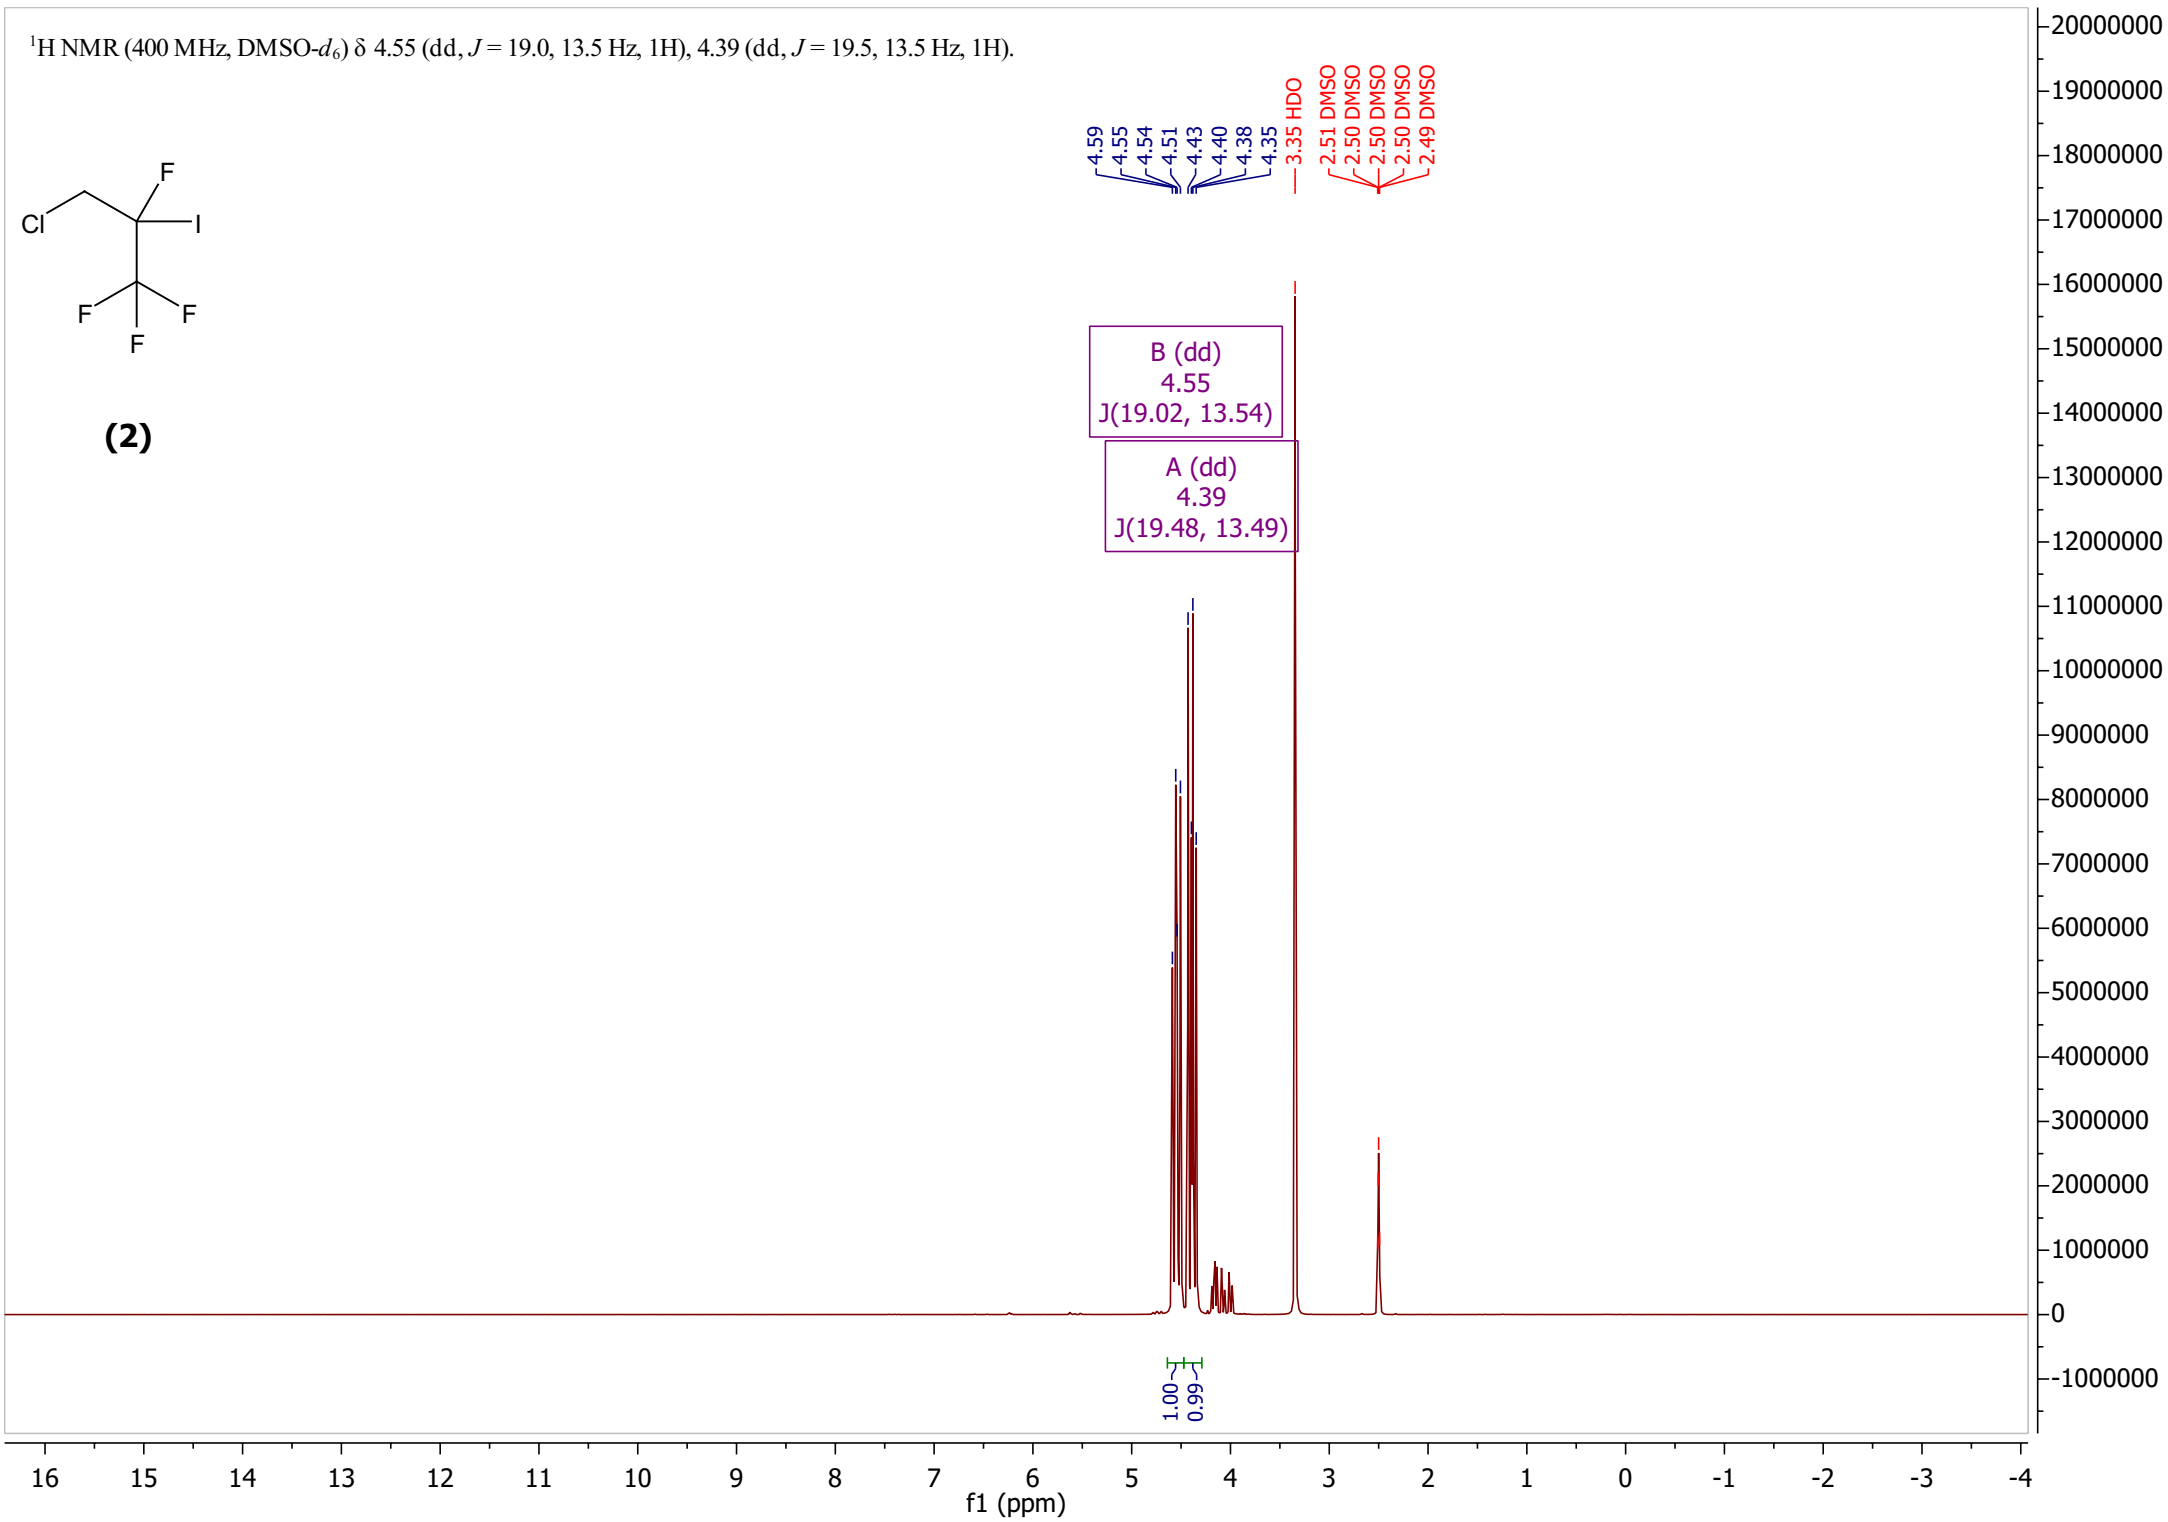

$^{19}\text{F}$  NMR (376 MHz,  $\text{DMSO-}d_6$ )  $\delta$  -74.7 (d,  $J = 11.8$  Hz), -139.0 (q,  $J = 11.8$  Hz).



(2)

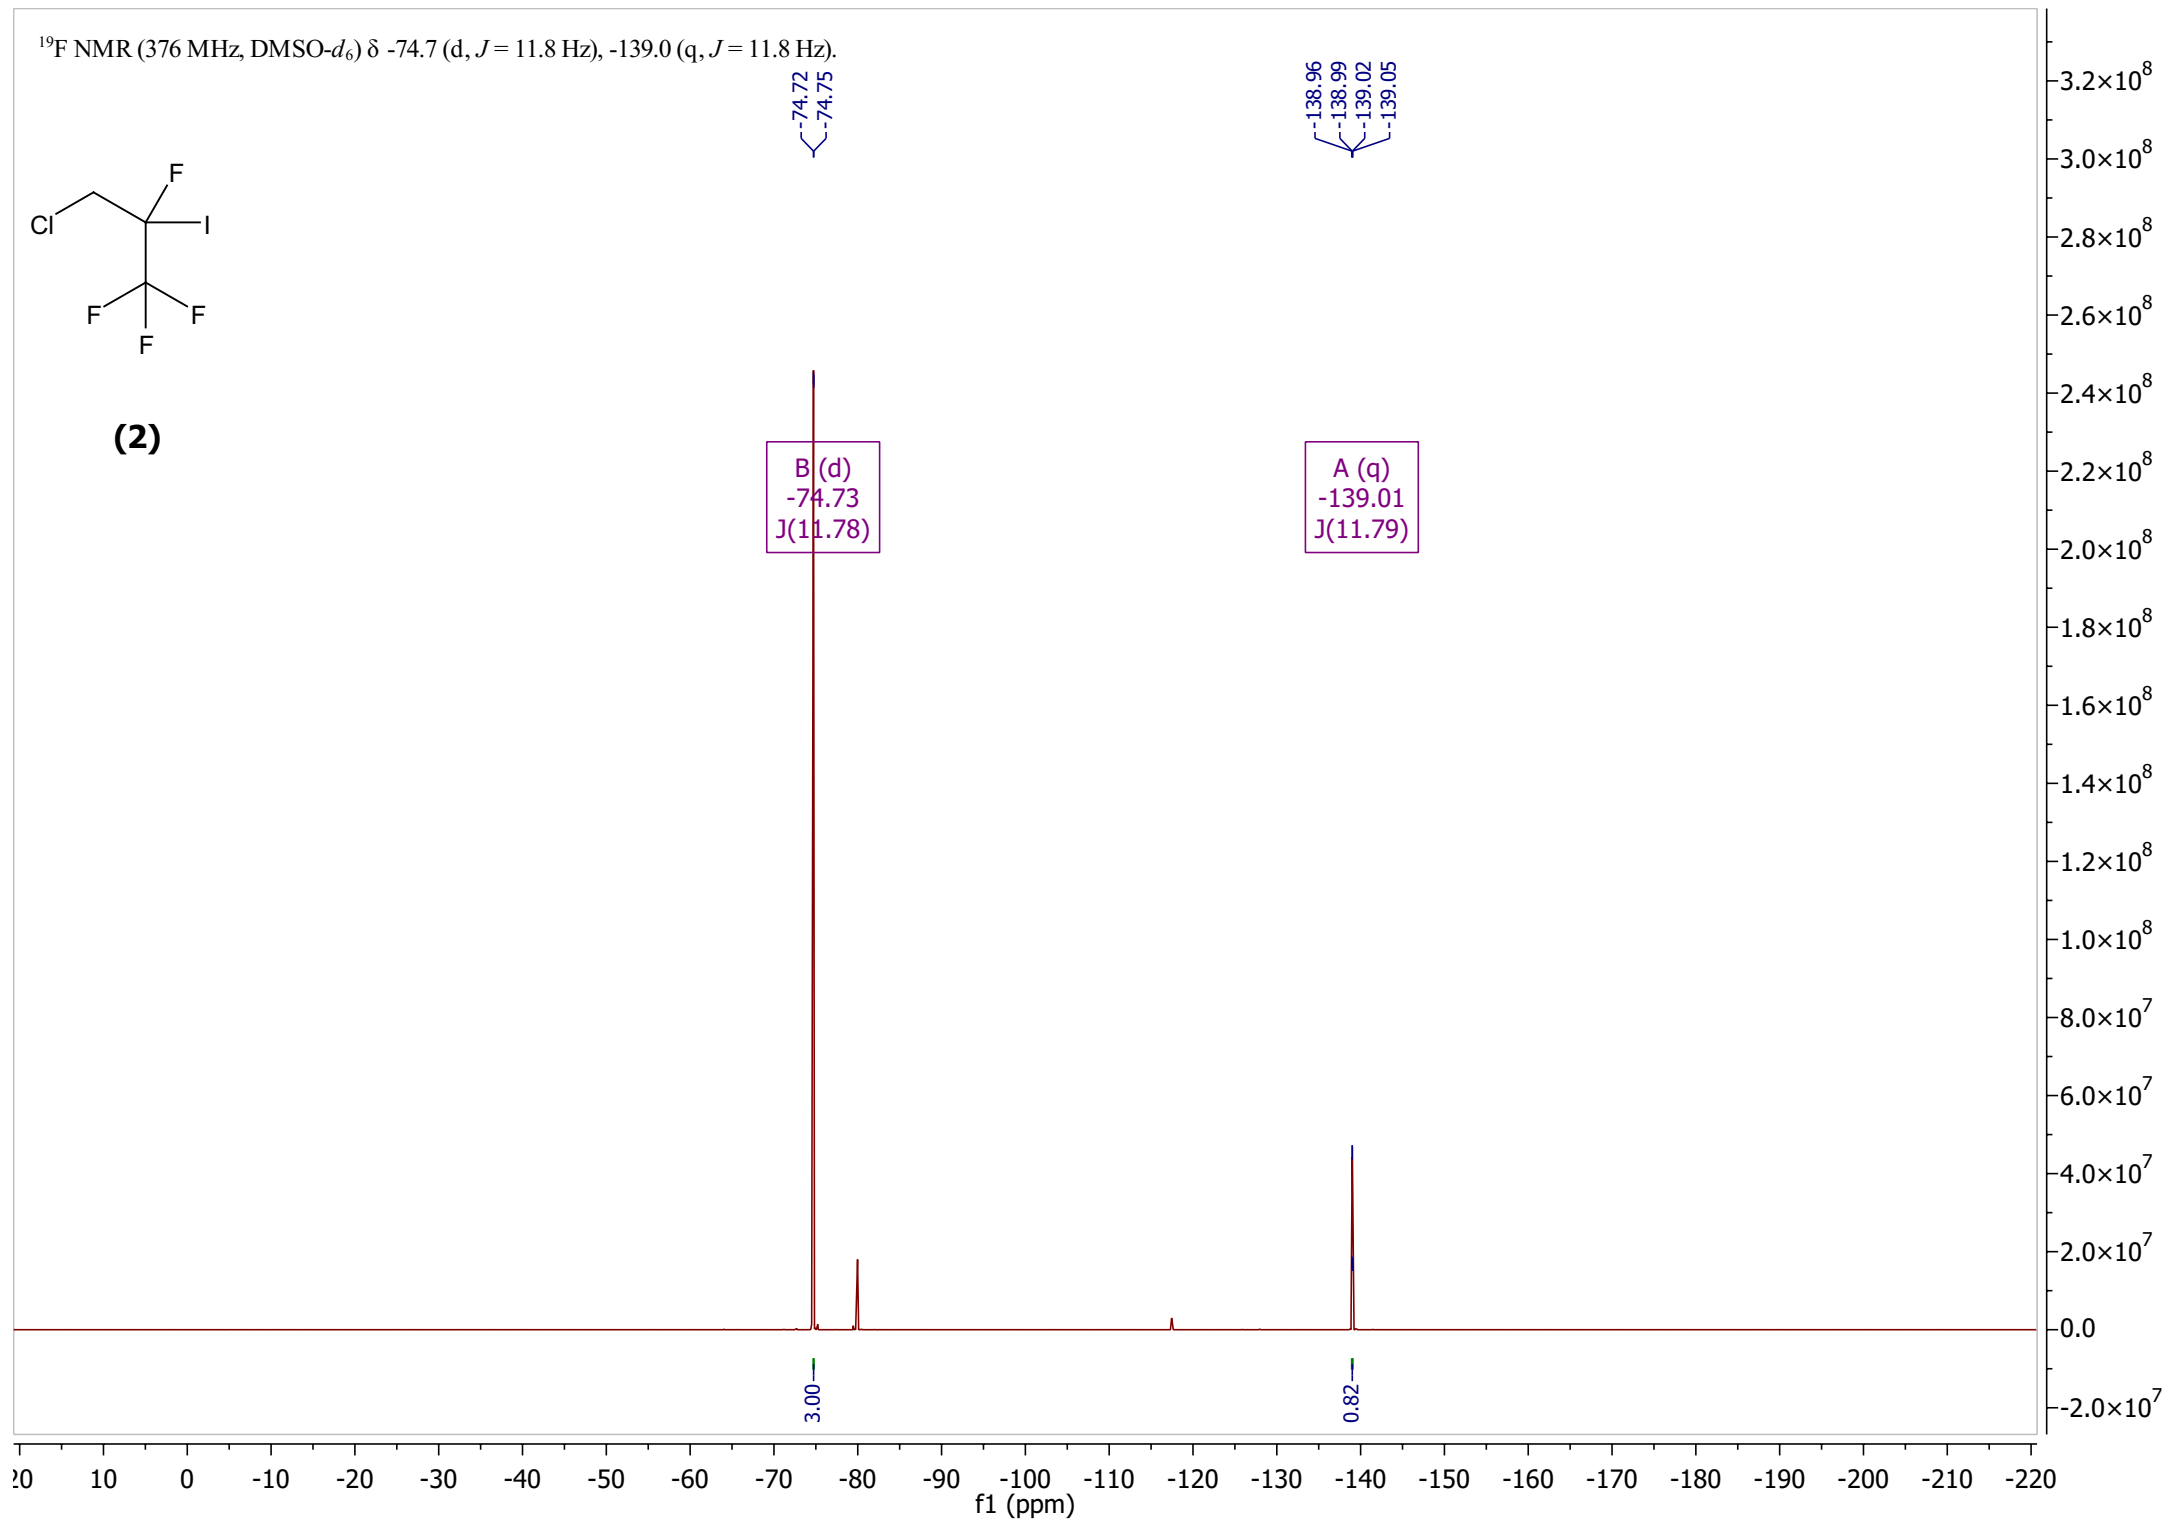

$^{13}\text{C}$  NMR (101 MHz,  $\text{DMSO-}d_6$ )  $\delta$  121.5 (qd,  $J = 283.2, 29.2$  Hz), 78.1 (dq,  $J = 255.6, 34.4$  Hz), 48.4 (d,  $J = 22.1$  Hz).

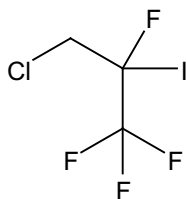

**(2)**

125.84  
125.55  
123.03  
122.74  
120.21  
119.92  
117.40  
117.11

79.90  
79.56  
79.22  
78.88  
77.36  
77.02  
76.68  
76.34

48.49  
48.27  
40.15 DMSO  
39.99 DMSO  
39.94 DMSO  
39.78 DMSO  
39.73 DMSO  
39.52 DMSO  
39.31 DMSO  
39.10 DMSO  
38.90 DMSO

B (qd)  
121.48  
J(283.16, 29.24)

A (dq)  
78.12  
J(255.62, 34.36)

C (d)  
48.38  
J(22.10)

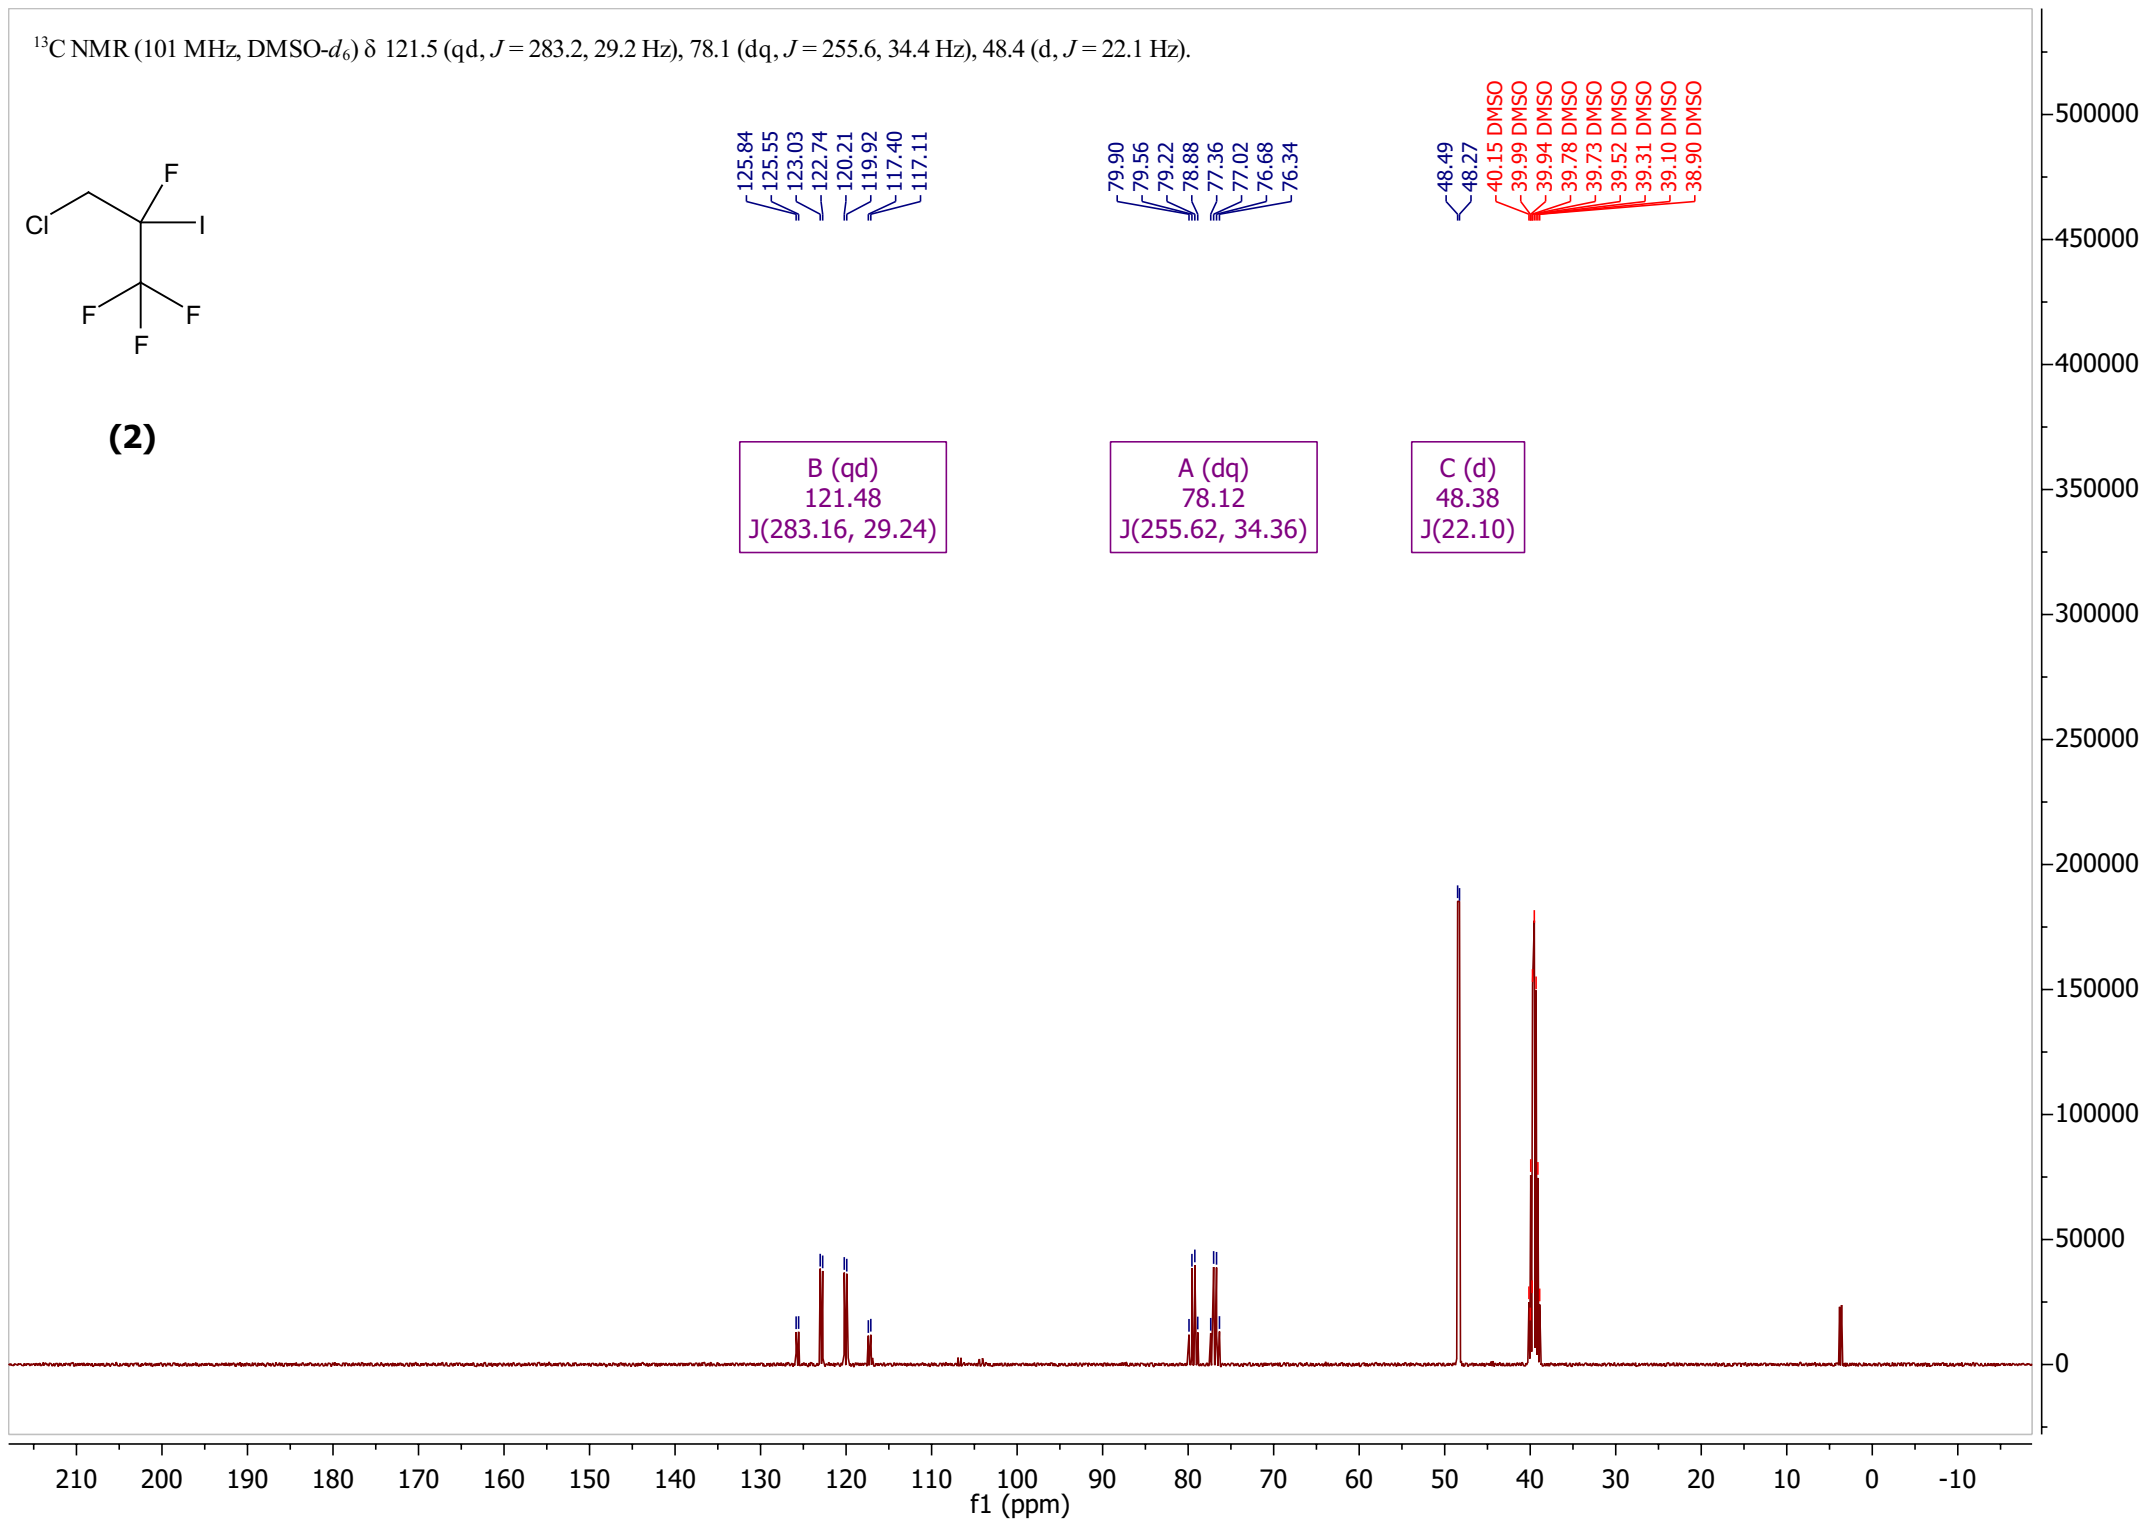

$^1\text{H}$  NMR (400 MHz, Acetonitrile- $d_3$ )  $\delta$  8.22 (dd,  $J = 8.9, 4.8$  Hz, 2H), 7.33 (t,  $J = 8.8$  Hz, 2H), 5.09 (dd,  $J = 13.1, 8.7$  Hz, 1H), 4.93 (dd,  $J = 28.1, 13.2$  Hz, 1H).

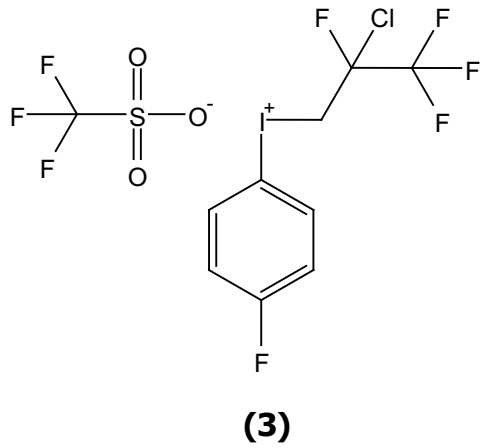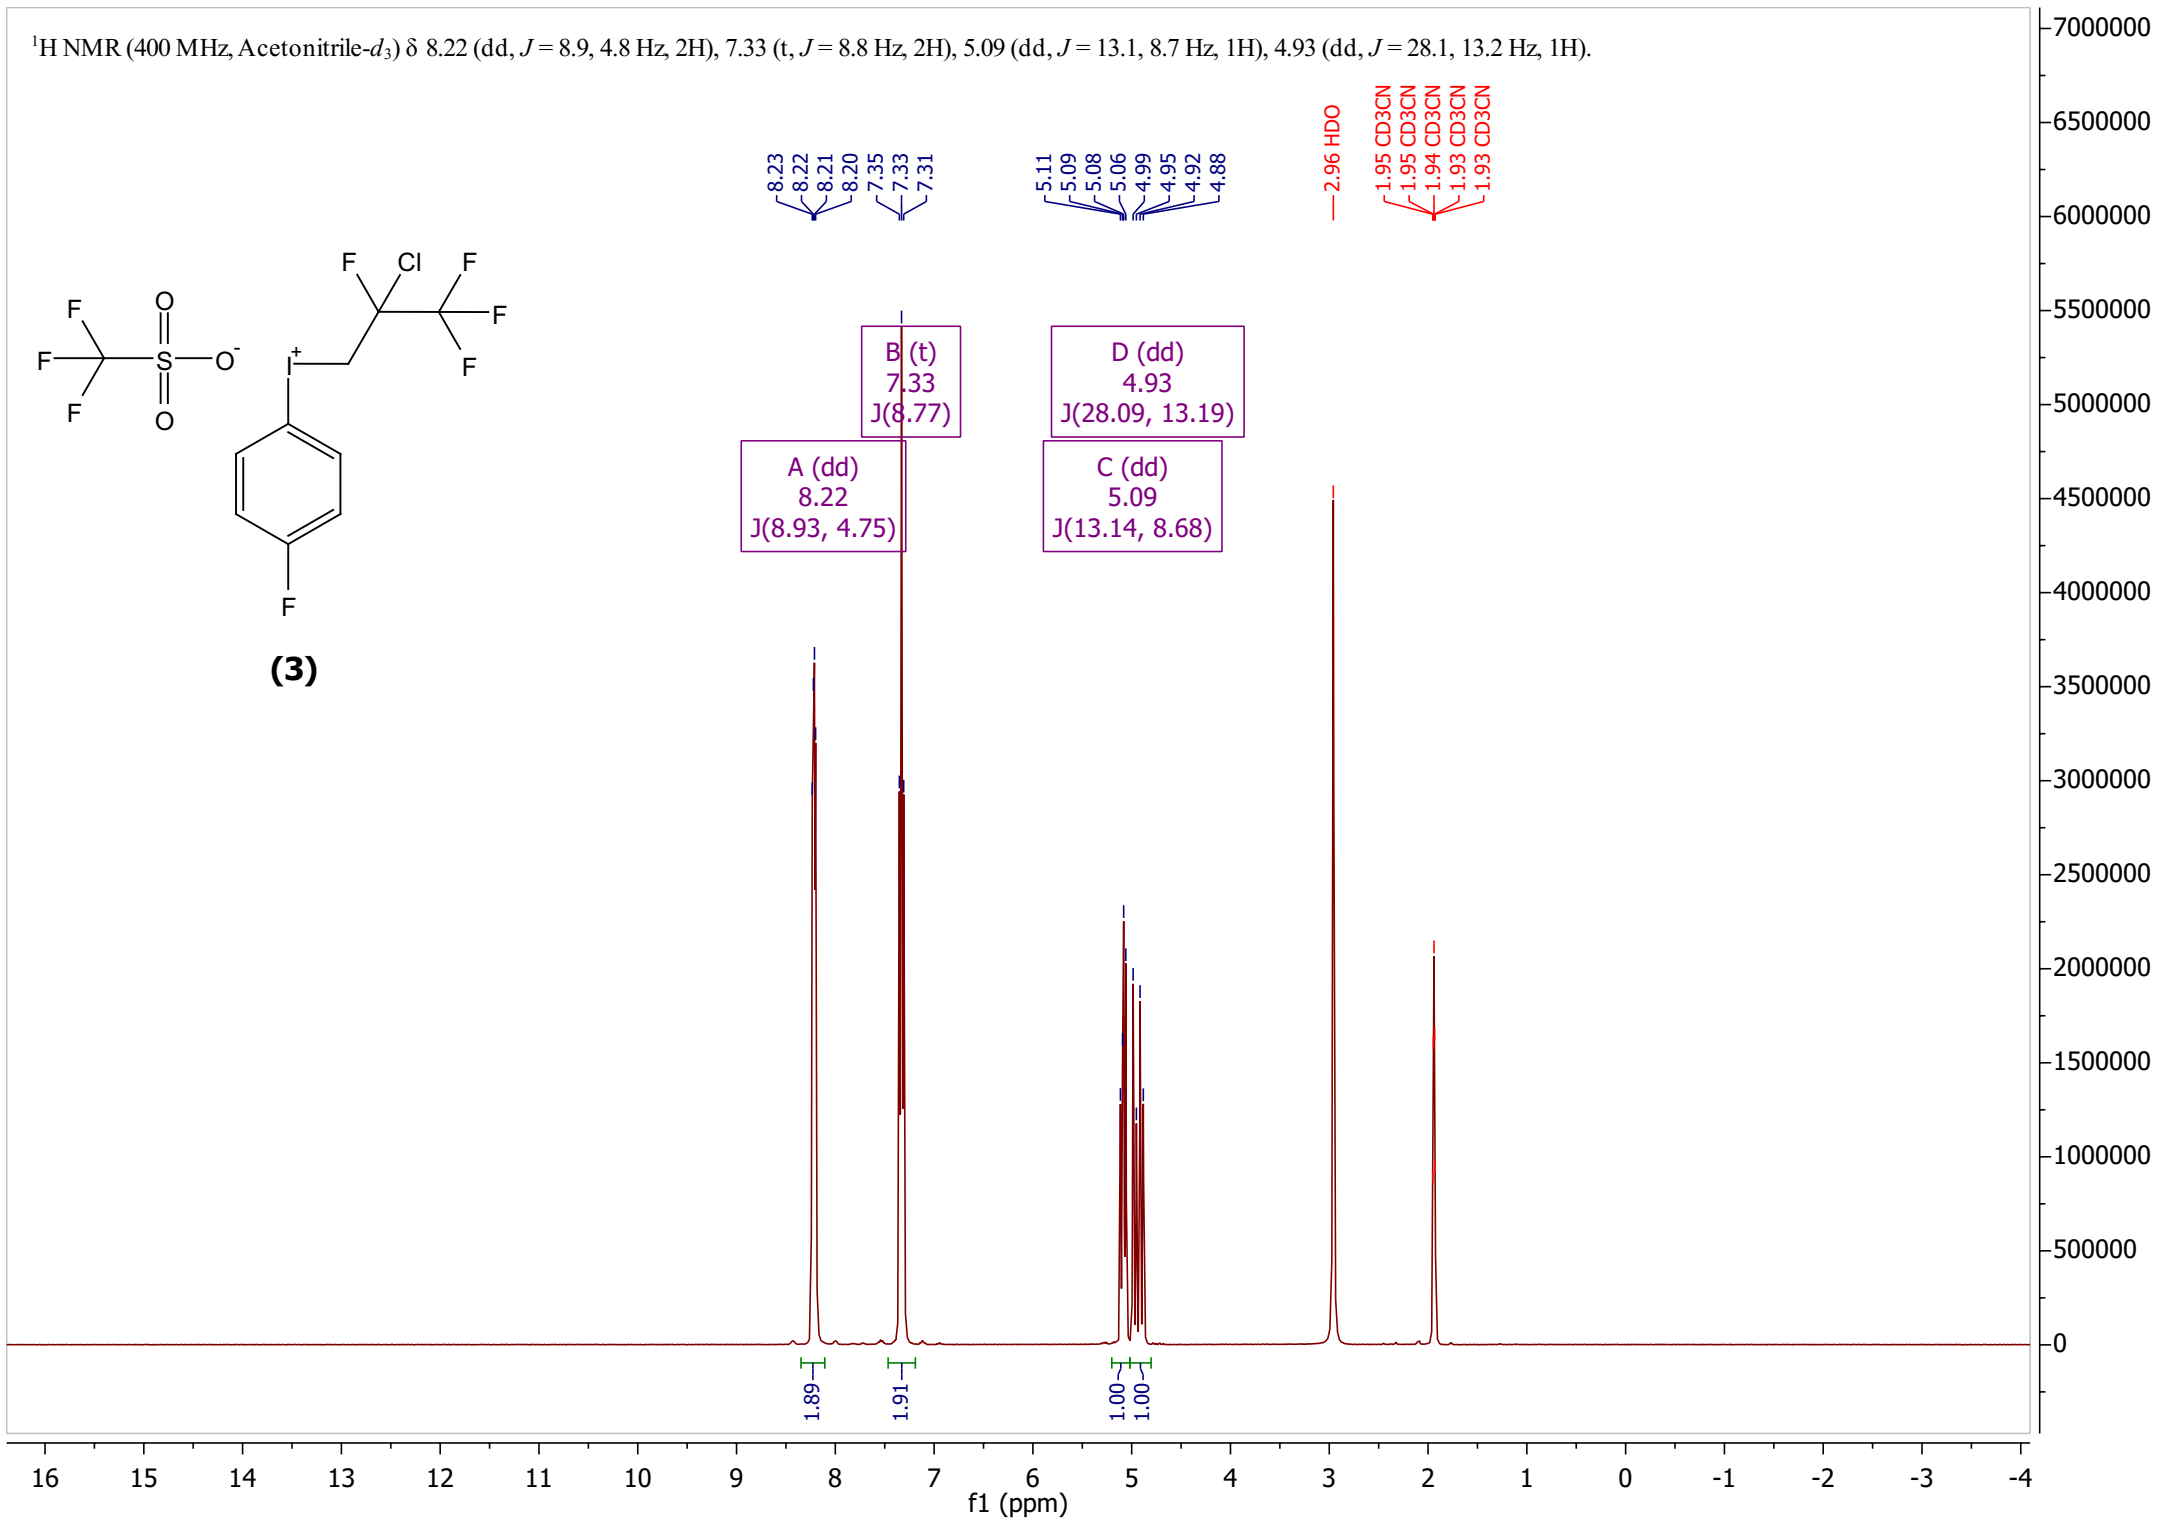

$^{19}\text{F}$  NMR (376 MHz, Acetonitrile- $d_3$ )  $\delta$  -79.3, -80.9 (d,  $J = 6.2$  Hz), -104.9, -118.3 (q,  $J = 6.2$  Hz).

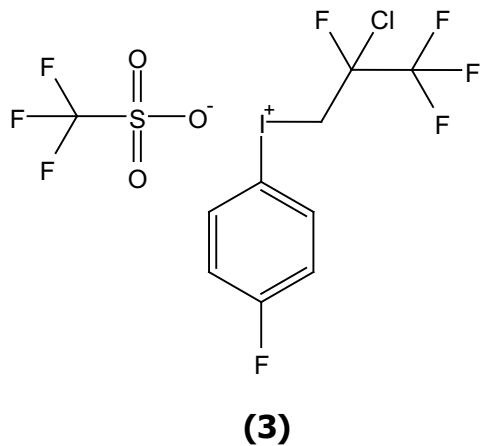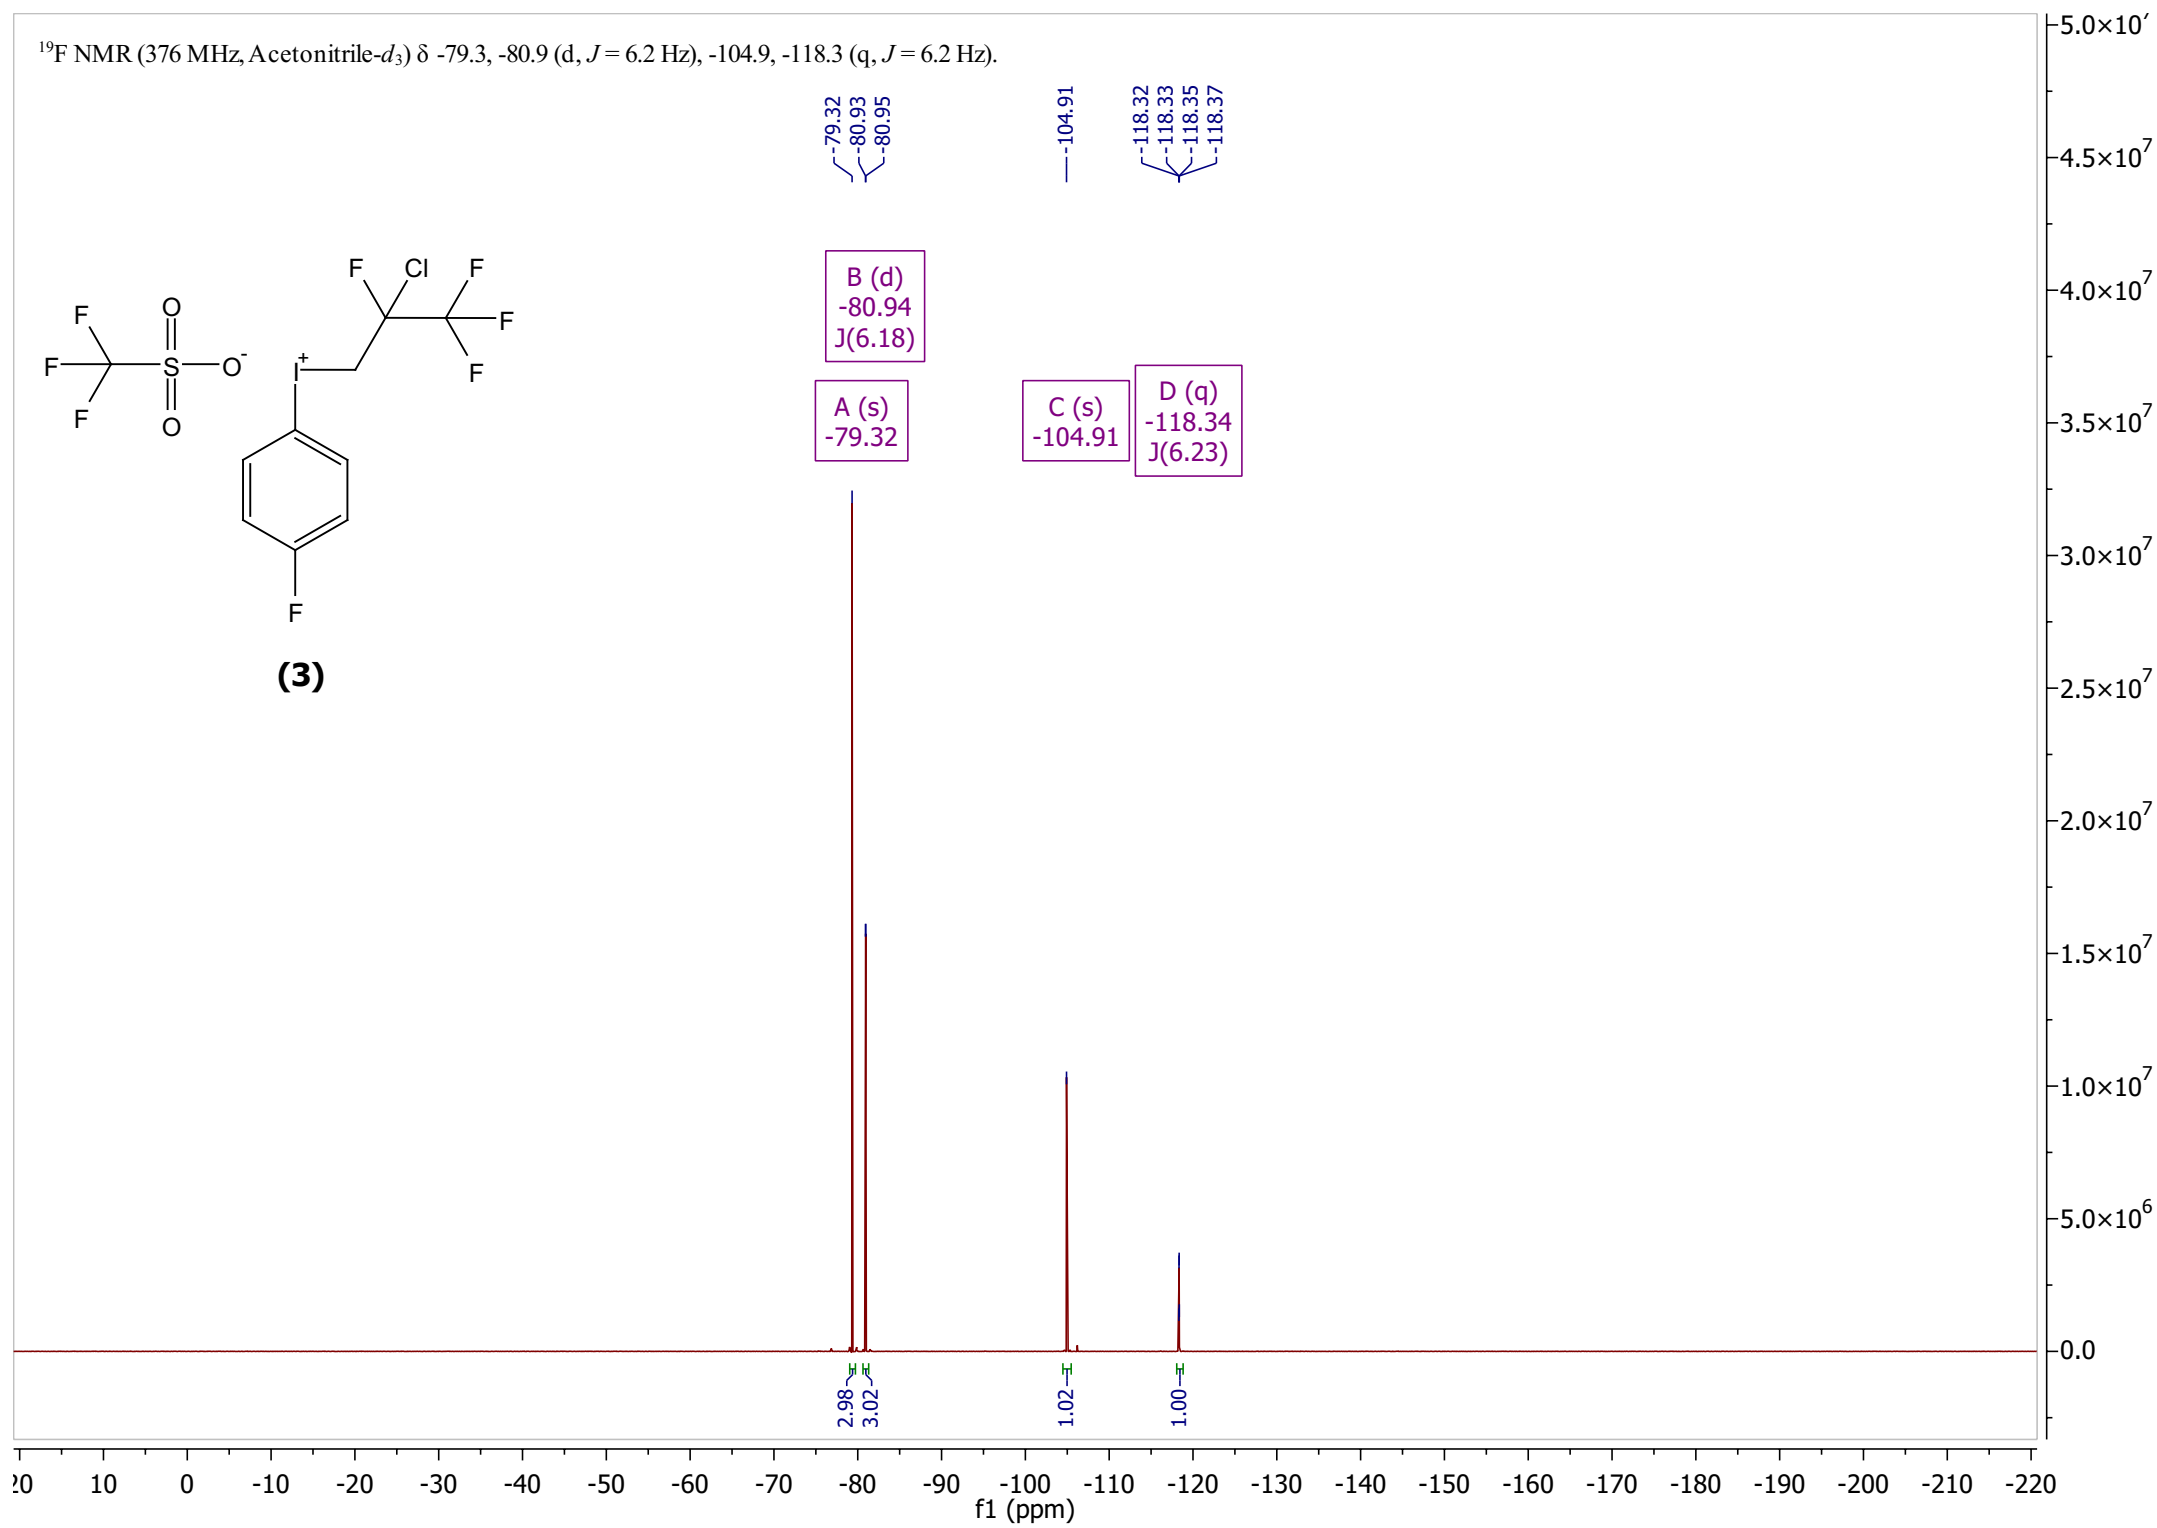



$^{13}\text{C}$  NMR (101 MHz, Acetonitrile- $d_3$ )  $\delta$  166.6 (d,  $J = 254.8$  Hz), 141.4 (d,  $J = 9.6$  Hz), 121.7 (q,  $J = 320.0$  Hz), 120.8 (d,  $J = 23.6$  Hz), 119.9 (qd,  $J = 285.4, 31.2$  Hz), 104.7 (dq,  $J = 254.7, 38.4$  Hz), 103.8 (d,  $J = 3.3$  Hz), 41.7 (d,  $J = 21.9$  Hz).

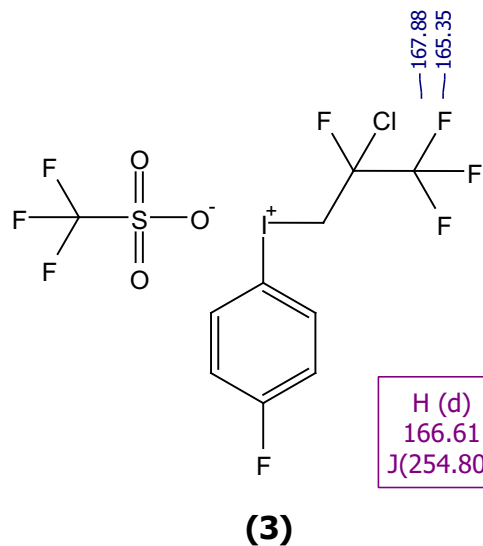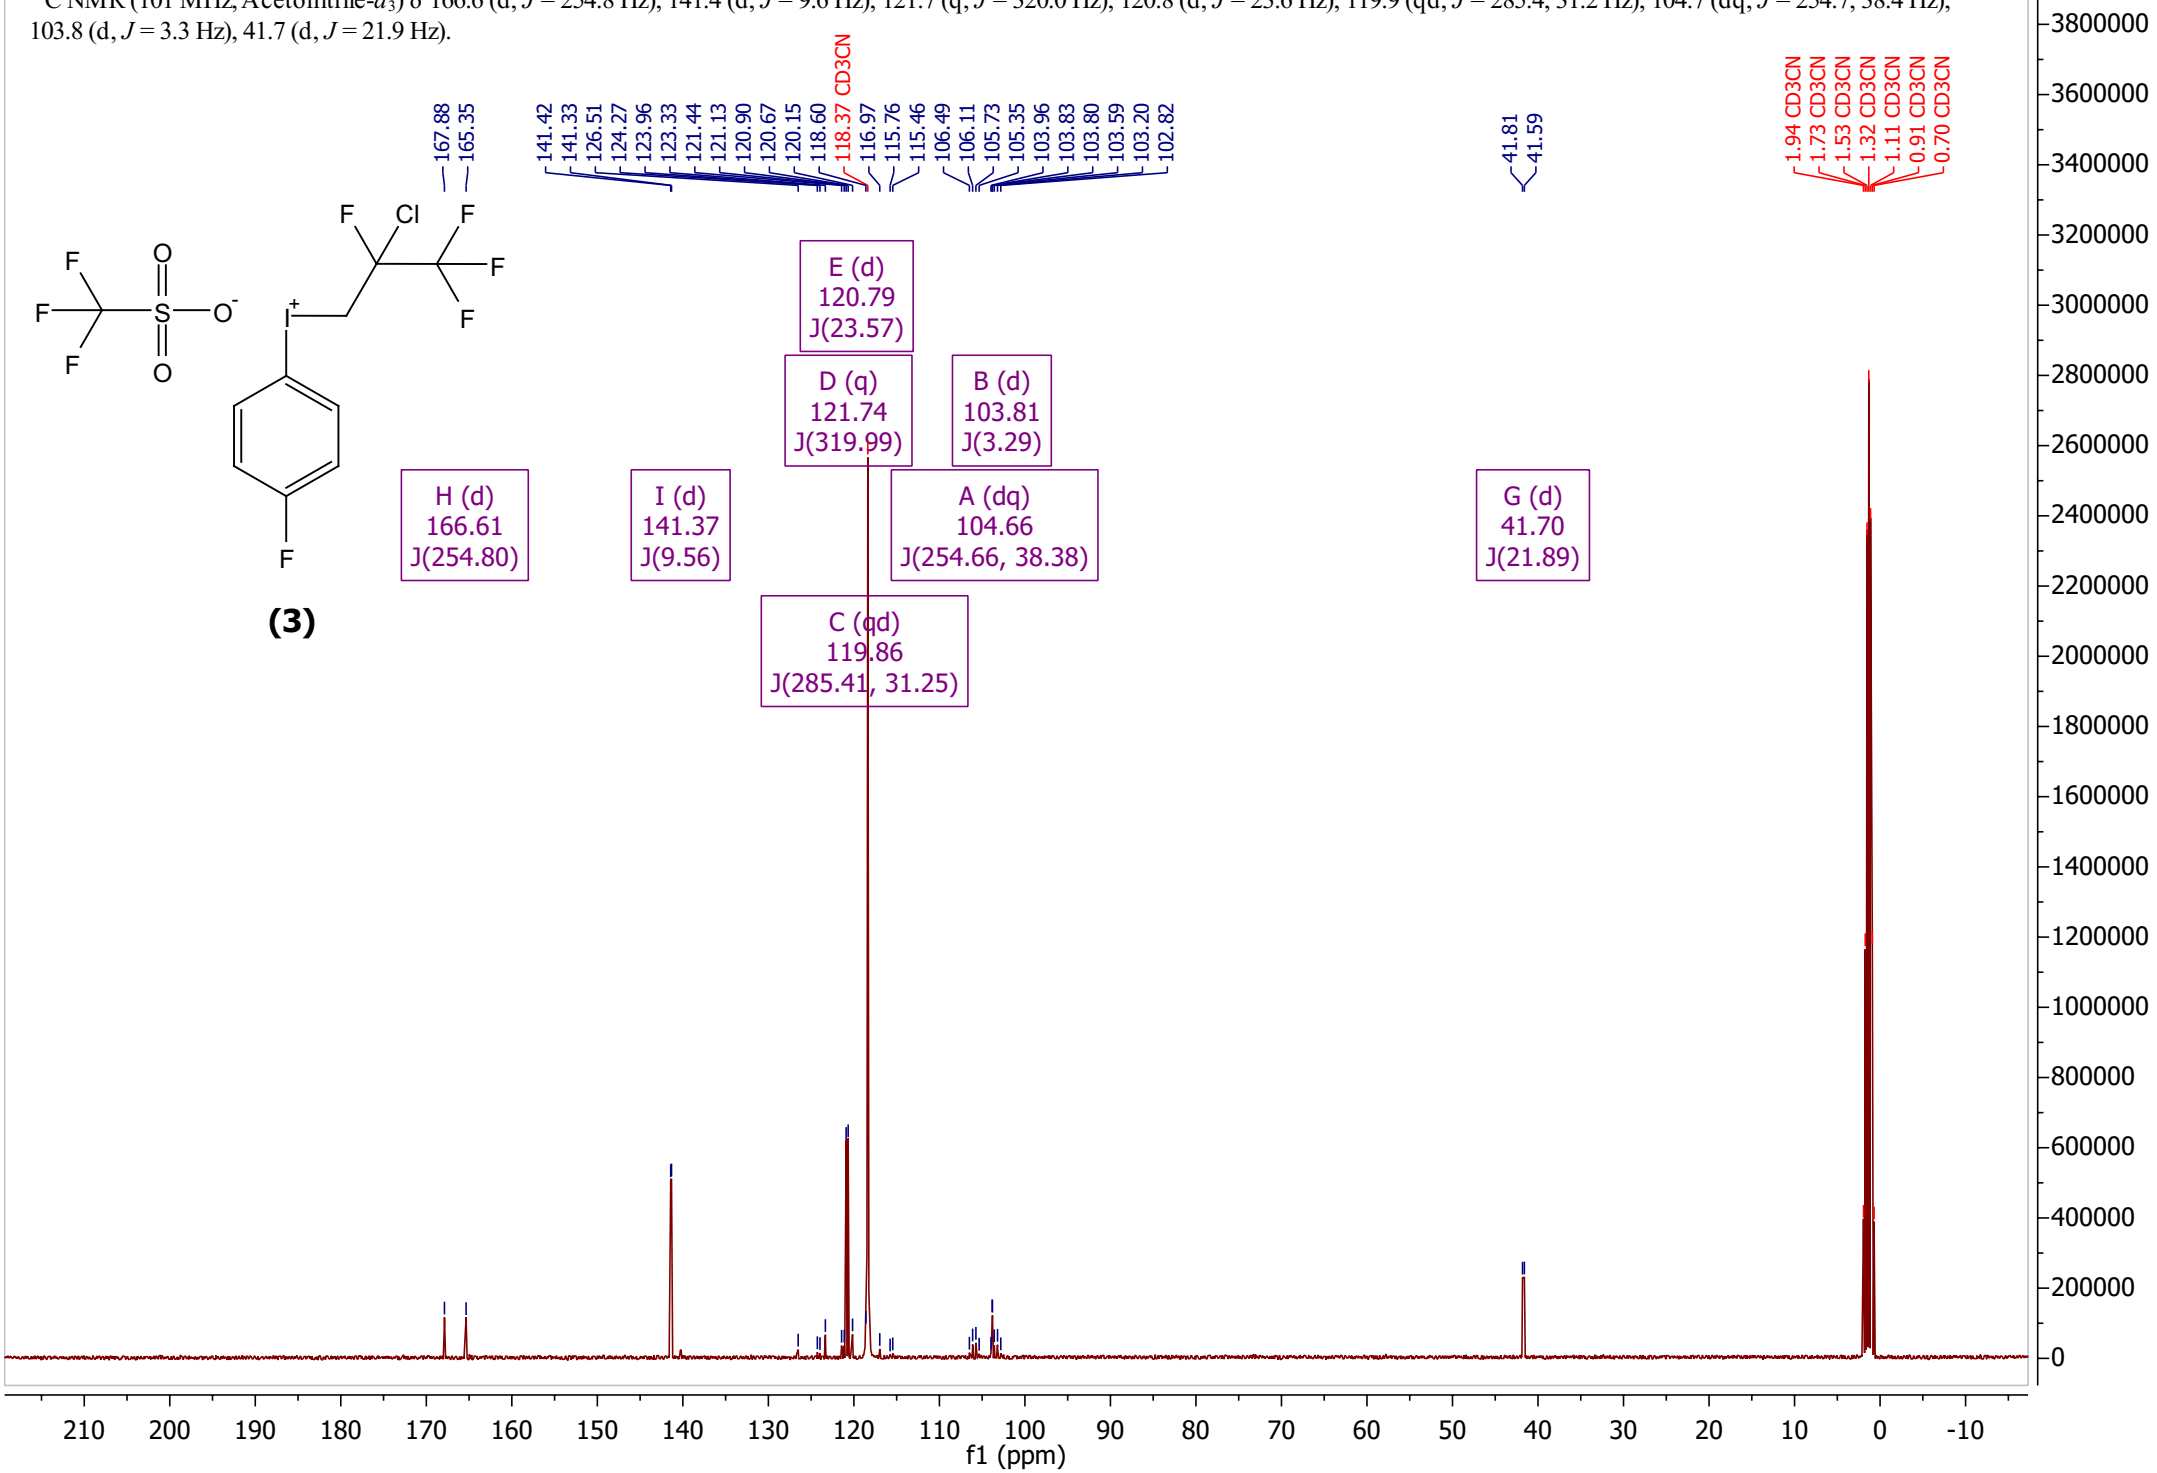

$^1\text{H}$  NMR (400 MHz, Chloroform-*d*)  $\delta$  9.67 (bs, 1H), 7.73 (d,  $J = 7.7$  Hz, 1H), 7.58 (t,  $J = 2.2$  Hz, 1H), 7.34 (t,  $J = 7.9$  Hz, 1H), 7.09 (dd,  $J = 8.0, 1.4$  Hz, 1H), 1.01 (s, 9H), 0.23 (s, 6H).

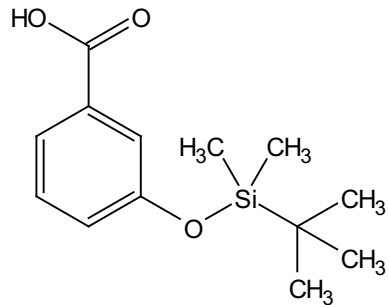

9.67  
7.74  
7.72  
7.58  
7.58  
7.57  
7.36  
7.34  
7.32  
7.26 CDCl3  
7.10  
7.08  
7.08

G (s)  
9.67

A (d)  
7.73  
J(7.67)

B (t)  
7.58  
J(2.24)

C (t)  
7.34  
J(7.93)

D (dd)  
7.09  
J(7.95, 1.41)

F (s)  
1.01

E (s)  
0.23

1.05

1.00  
0.99  
1.02  
1.00

9.00

5.97

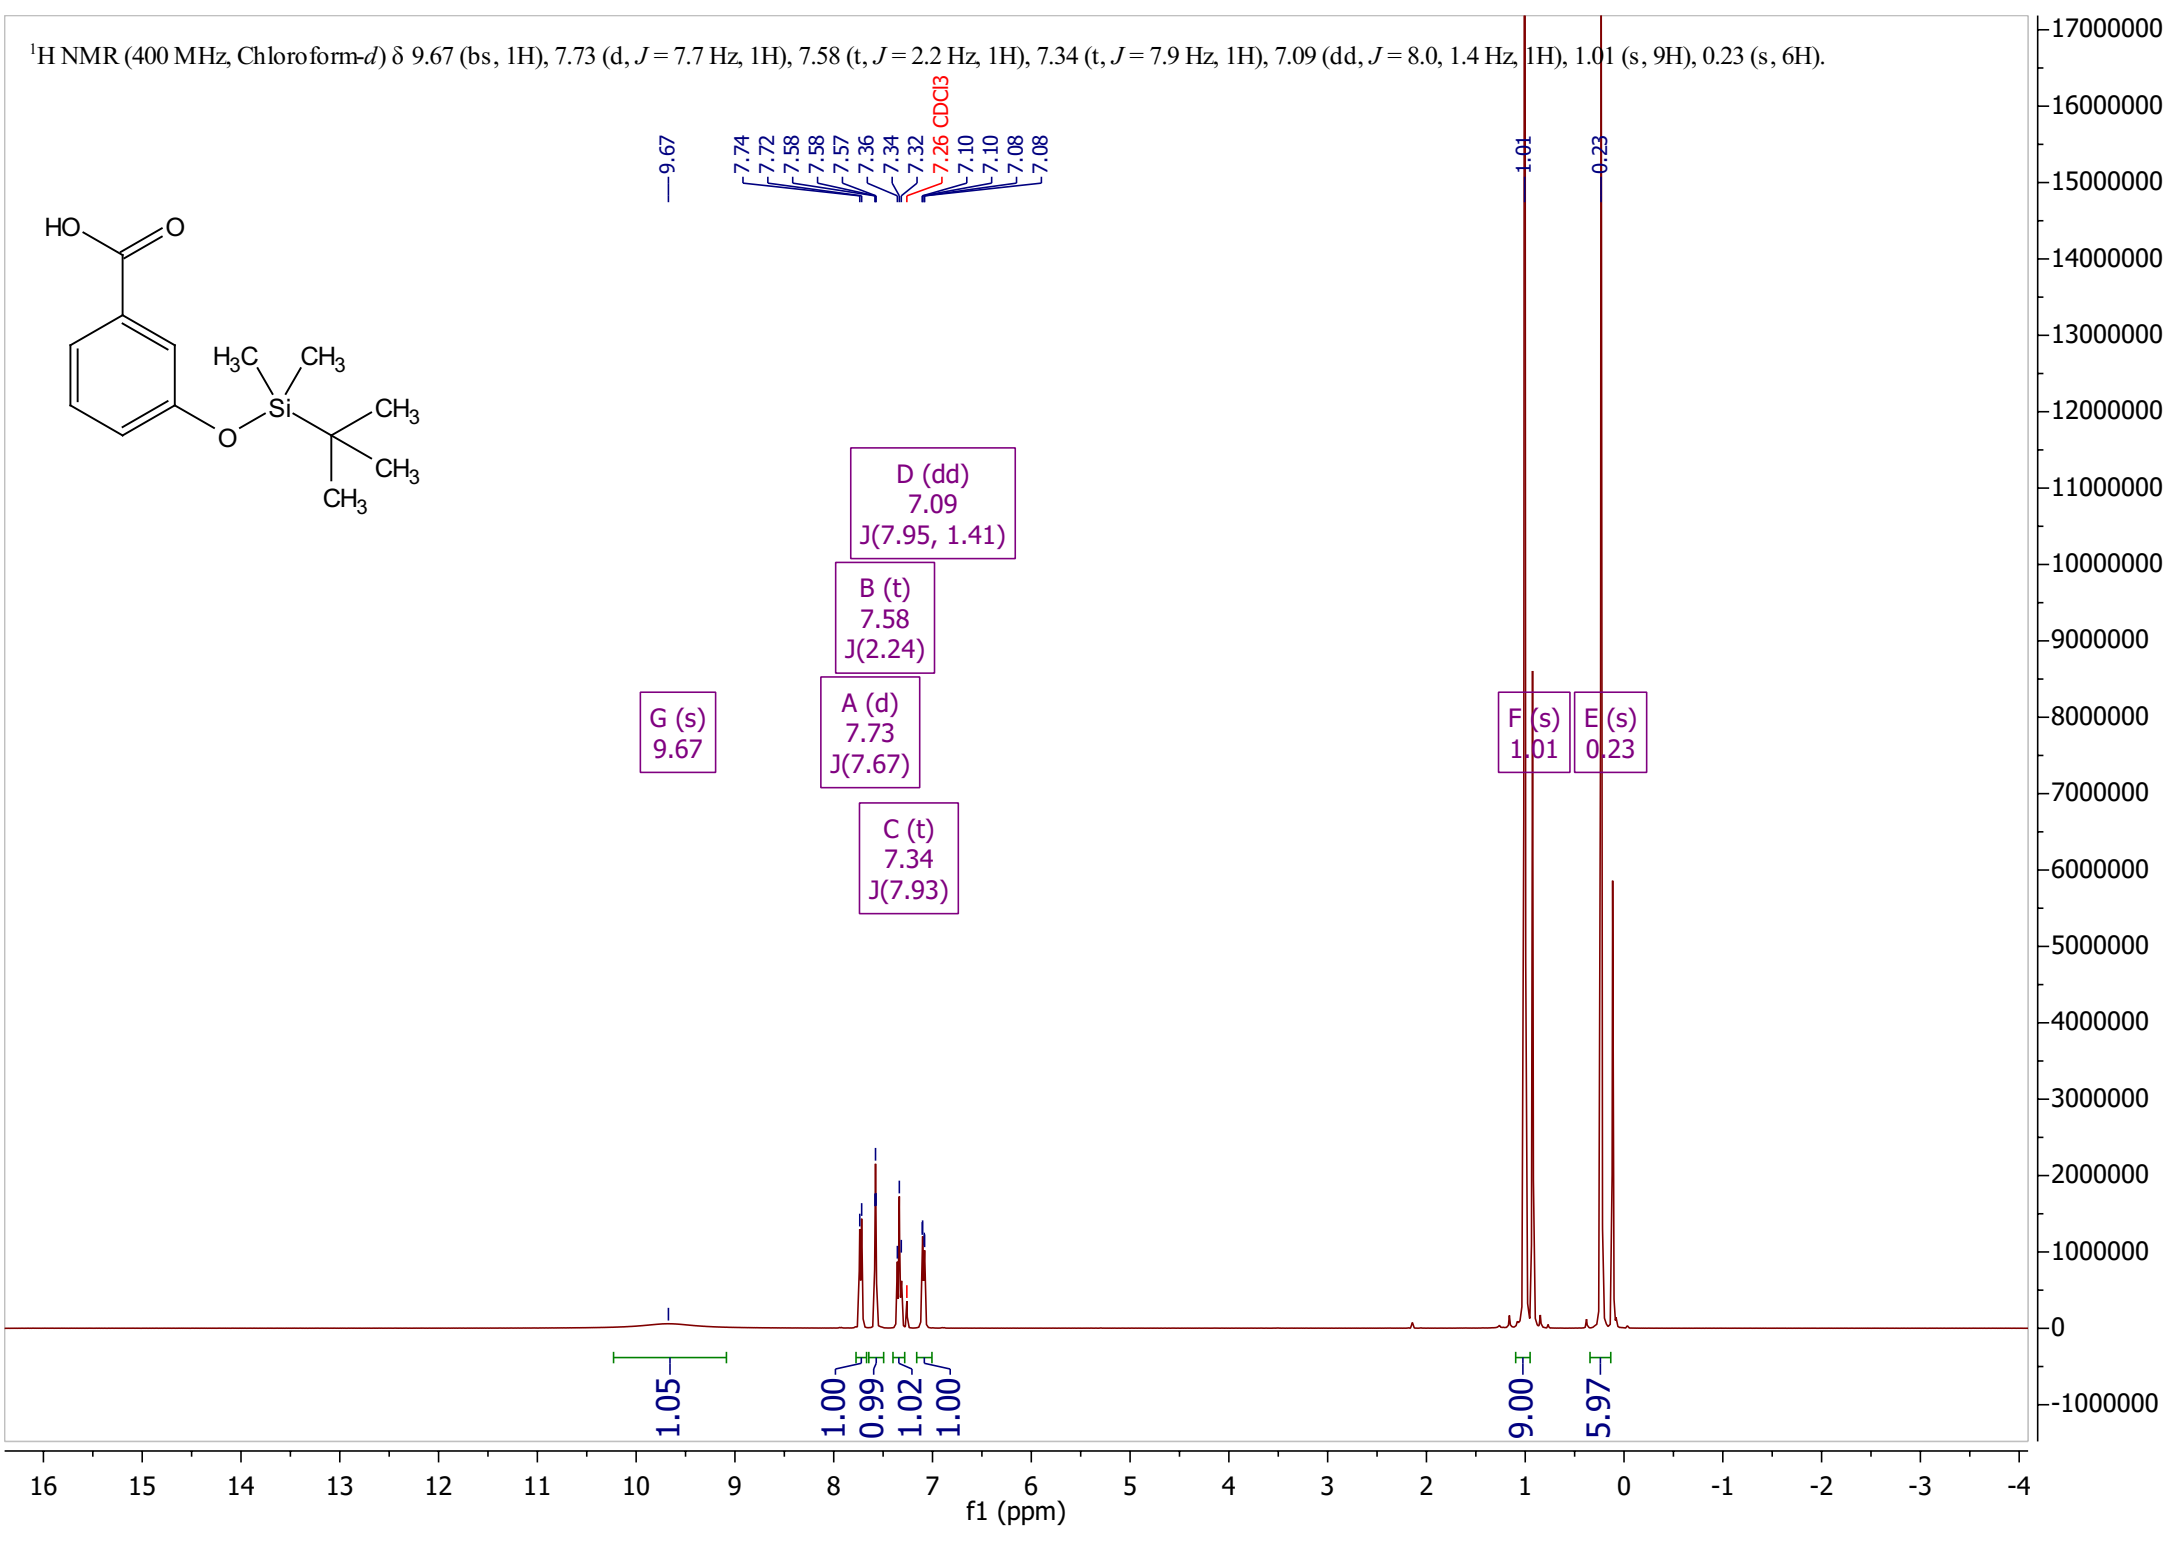

$^{13}\text{C}$  NMR (101 MHz, Chloroform-*d*)  $\delta$  172.2, 155.9, 130.8, 129.7, 125.9, 123.4, 121.6, 25.8, 18.4, -4.3.

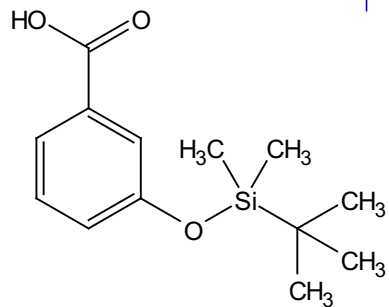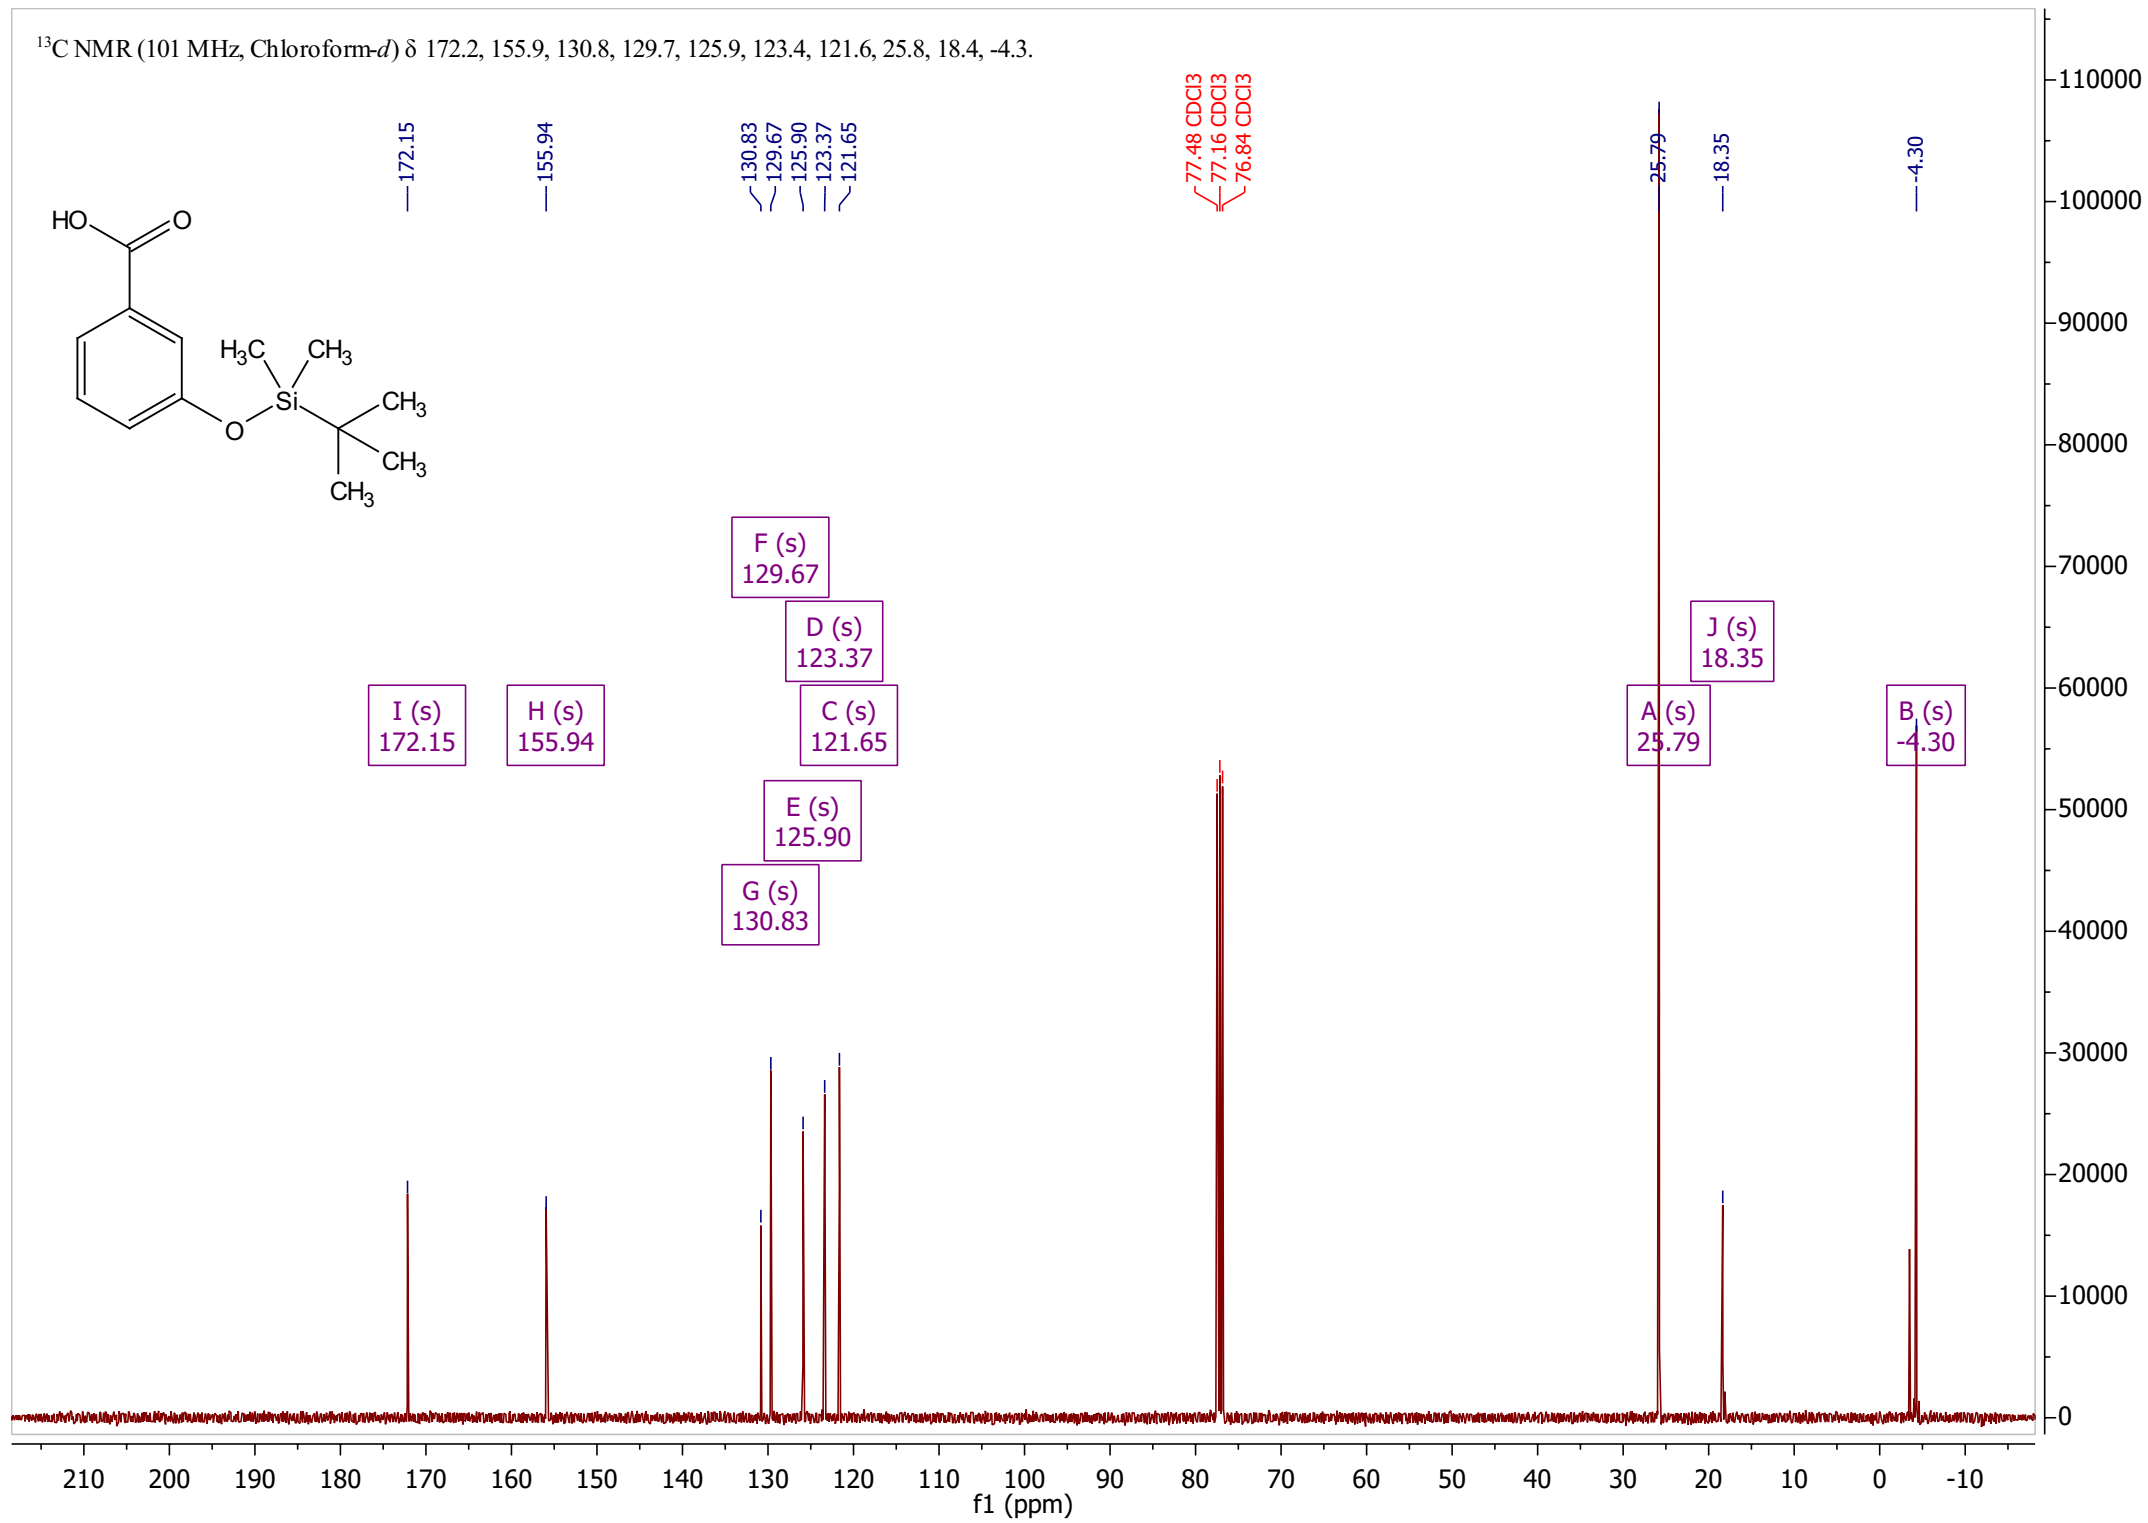

$^1\text{H}$  NMR (400 MHz, Chloroform-*d*)  $\delta$  7.86 (dd,  $J = 8.1, 1.8$  Hz, 1H), 7.54 (td,  $J = 8.1, 7.5, 1.9$  Hz, 1H), 7.10 (d,  $J = 8.5$  Hz, 1H), 7.05 (t,  $J = 8.2$  Hz, 1H), 4.23 (t,  $J = 4.4$  Hz, 2H), 3.98 (dt,  $J = 6.6, 4.3$  Hz, 2H), 2.59 (t,  $J = 6.6$  Hz, 1H).

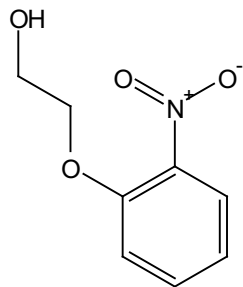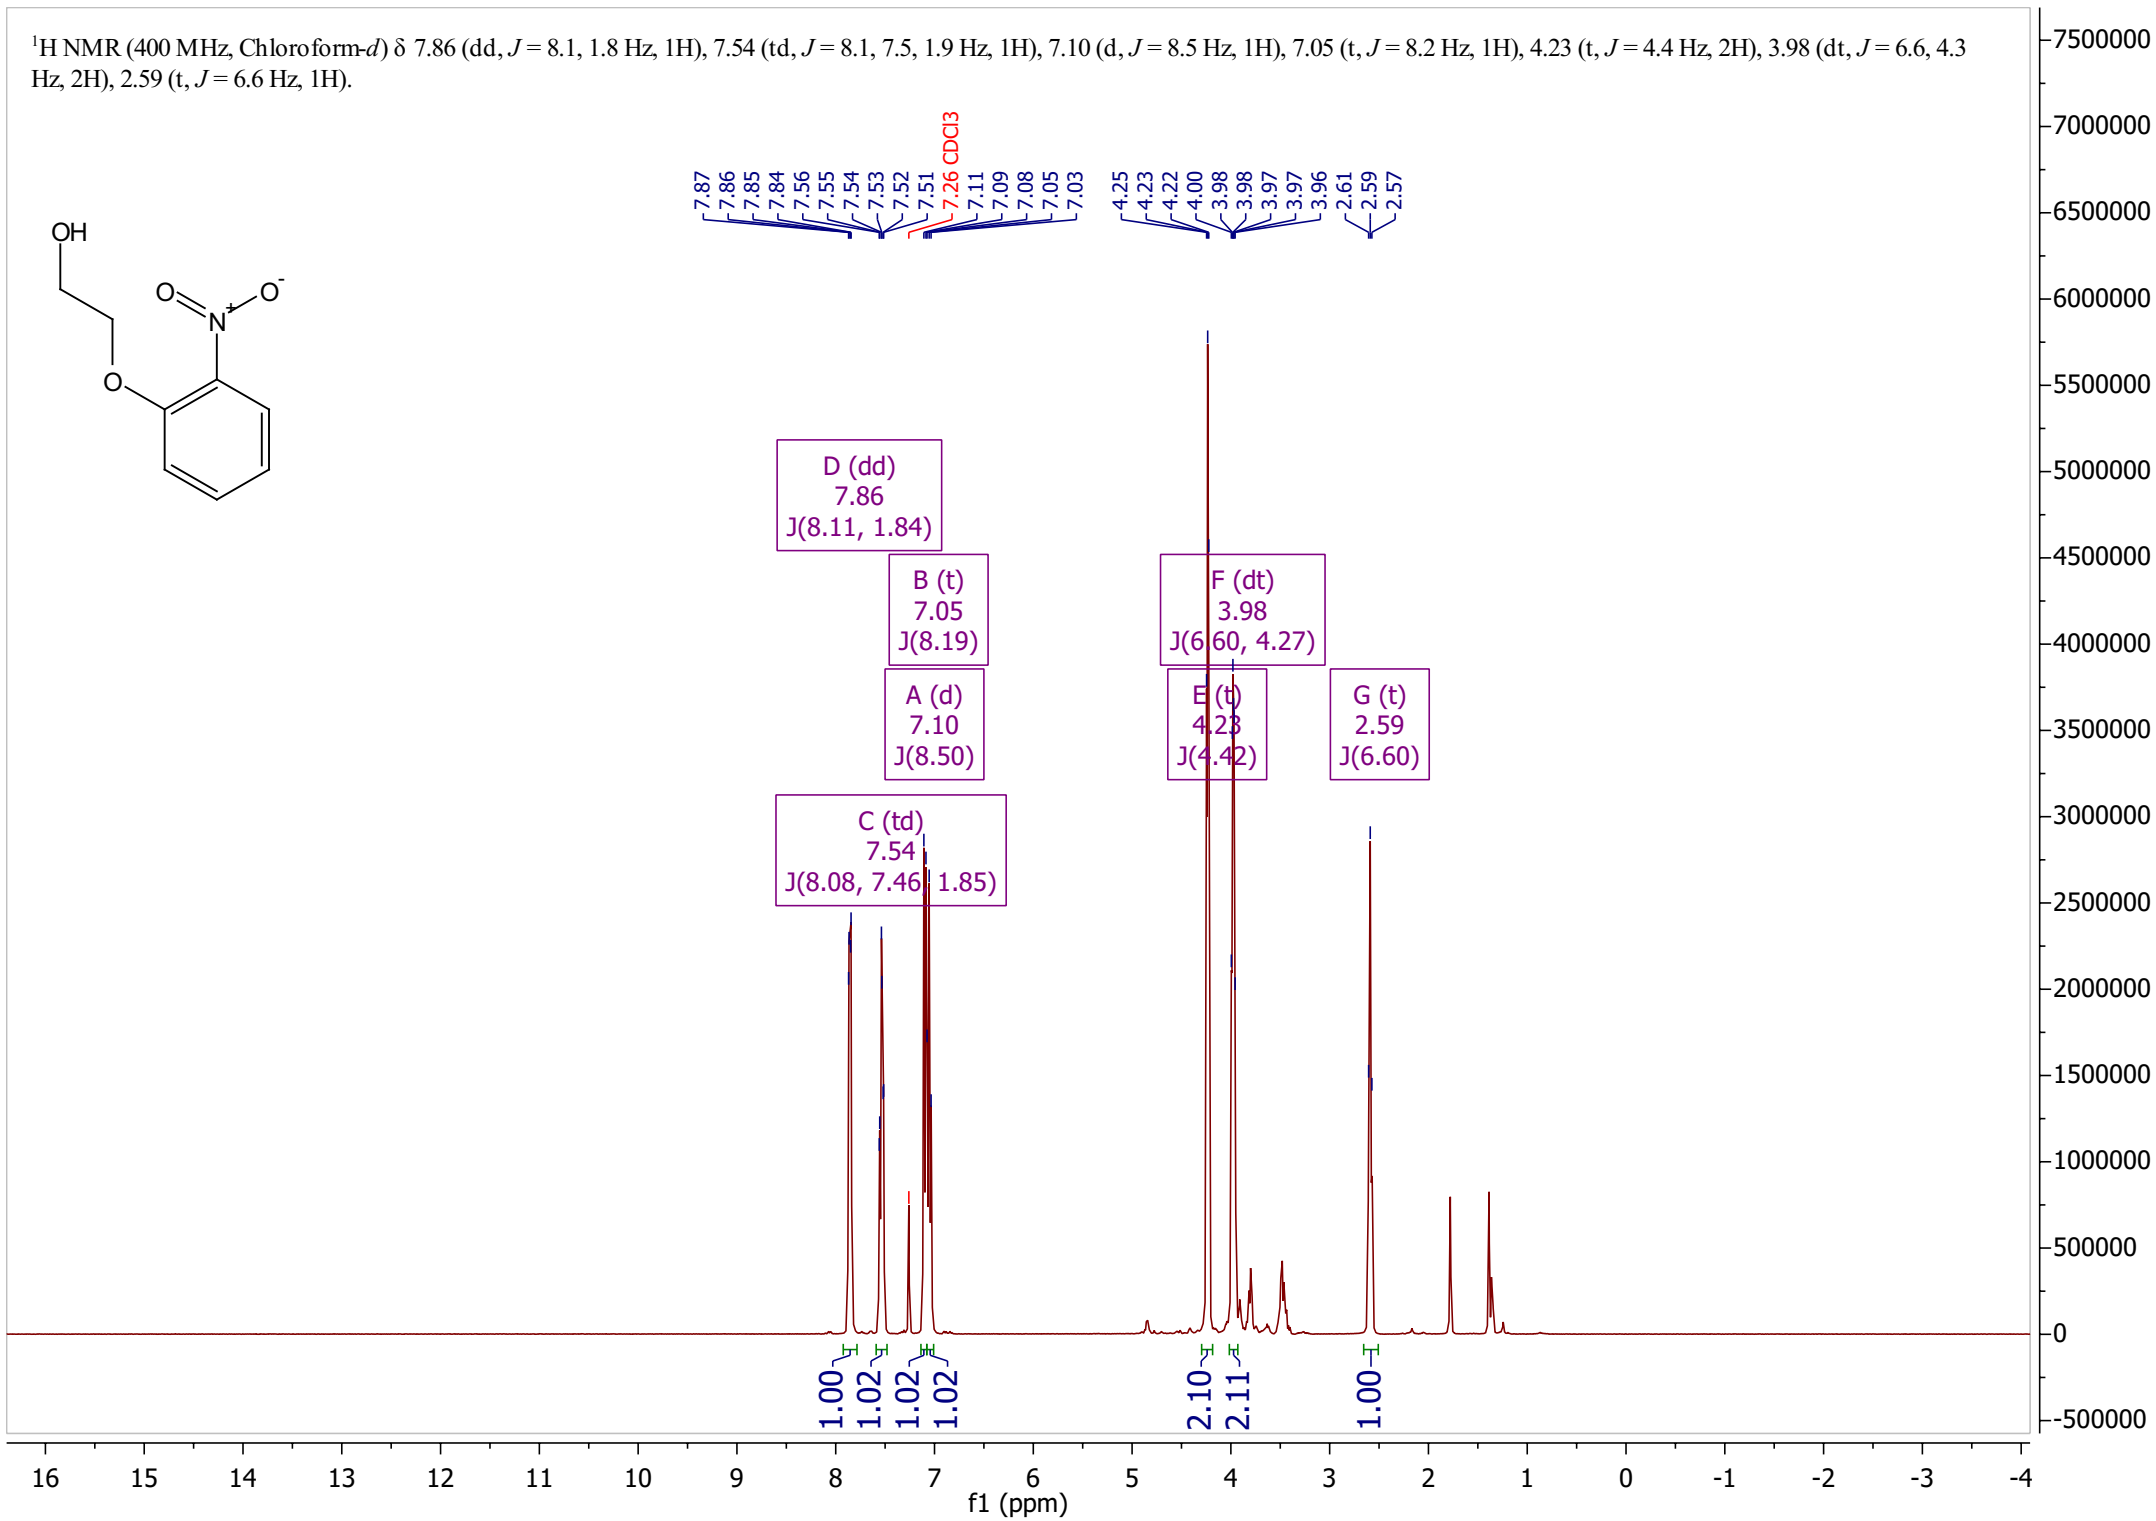

$^{13}\text{C}$  NMR (101 MHz, Chloroform-*d*)  $\delta$  152.4, 140.0, 134.5, 125.9, 121.1, 115.3, 71.5, 61.1.



152.38  
140.05  
134.52  
125.95  
121.06  
115.30

77.48 CDCl3  
77.16 CDCl3  
76.84 CDCl3  
71.46

61.07

G (s) 152.38  
H (s) 140.05  
F (s) 134.52  
D (s) 121.06  
E (s) 125.95  
C (s) 115.30  
A (s) 71.46  
B (s) 61.07

210 200 190 180 170 160 150 140 130 120 110 100 90 80 70 60 50 40 30 20 10 0 -10  
f1 (ppm)

80000  
75000  
70000  
65000  
60000  
55000  
50000  
45000  
40000  
35000  
30000  
25000  
20000  
15000  
10000  
5000  
0

<sup>1</sup>H NMR (400 MHz, Chloroform-*d*) δ 7.83 (dd, *J* = 8.3, 1.6 Hz, 1H), 7.64 (d, *J* = 7.7 Hz, 1H), 7.56 – 7.47 (m, 2H), 7.29 (t, *J* = 8.1 Hz, 1H), 7.13 (d, *J* = 8.4 Hz, 1H), 7.08 – 7.02 (m, 2H), 4.70 (d, *J* = 4.6 Hz, 2H), 4.44 (t, *J* = 4.8 Hz, 2H), 0.98 (s, 9H), 0.20 (s, 6H).

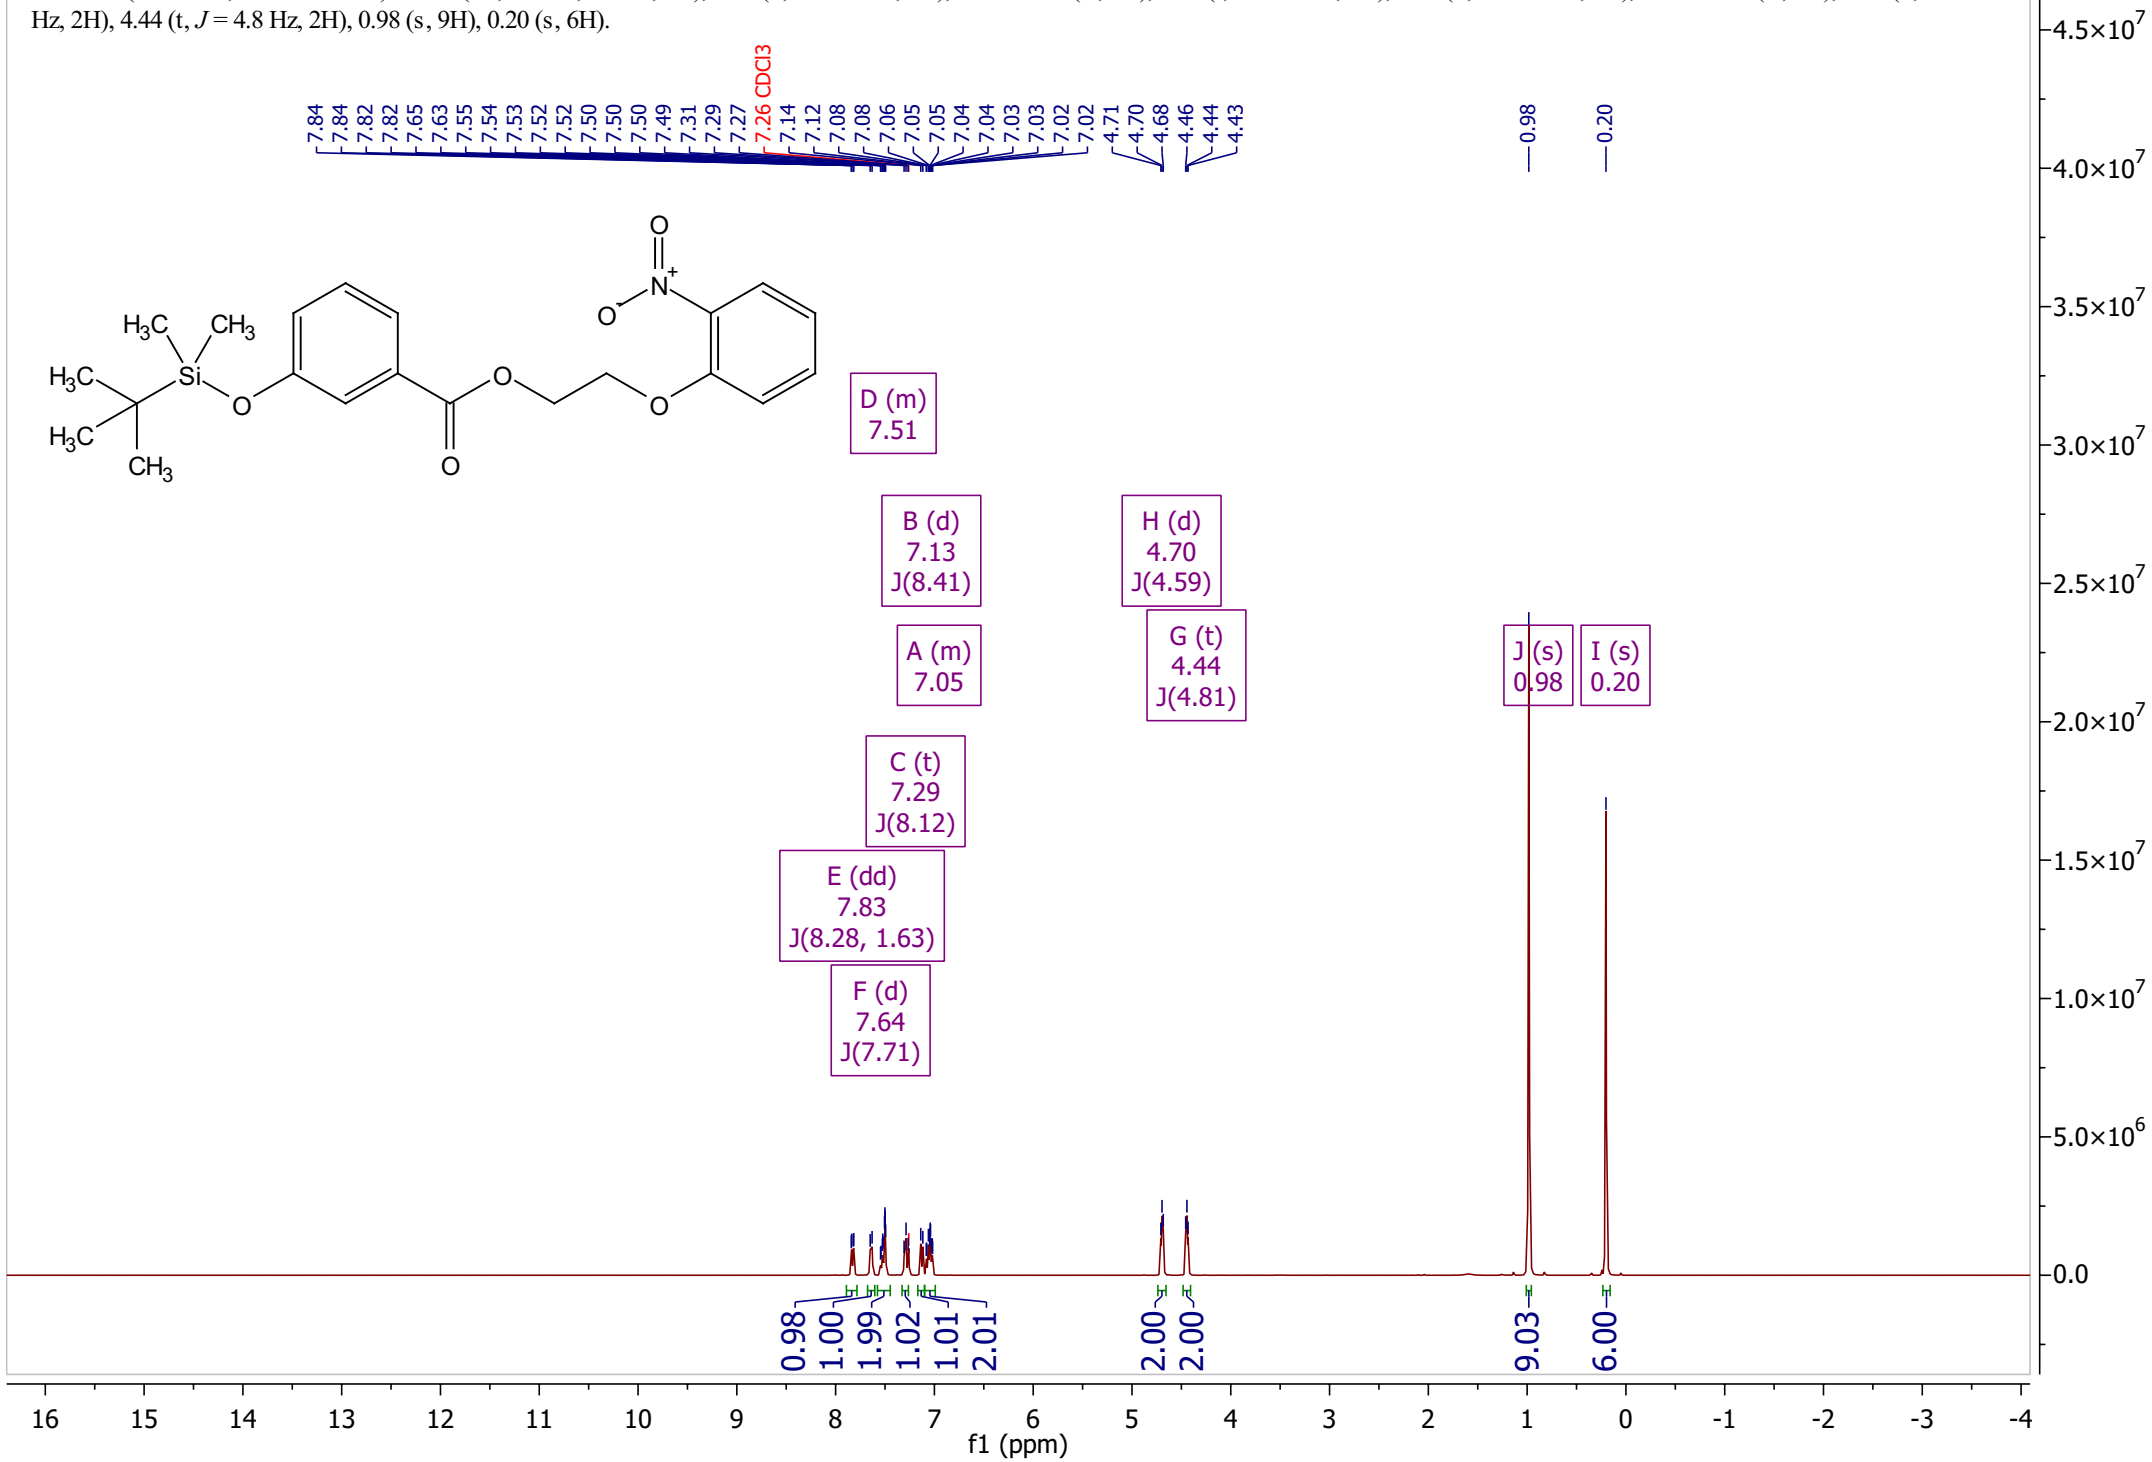

$^{13}\text{C}$  NMR (101 MHz, Chloroform-*d*)  $\delta$  166.4, 155.9, 152.0, 140.6, 134.1, 131.1, 129.6, 125.8, 125.3, 122.9, 121.3, 121.2, 115.3, 68.0, 62.8, 25.8, 18.3, -4.3.

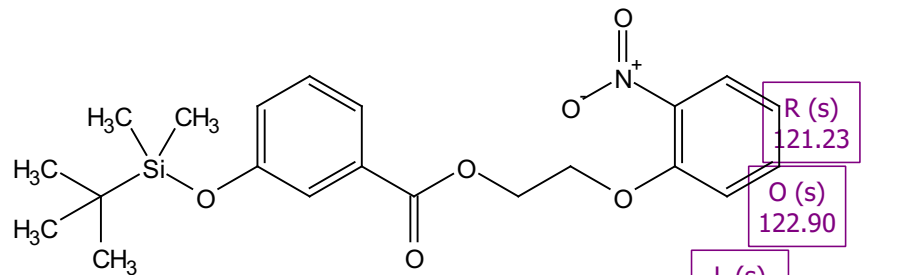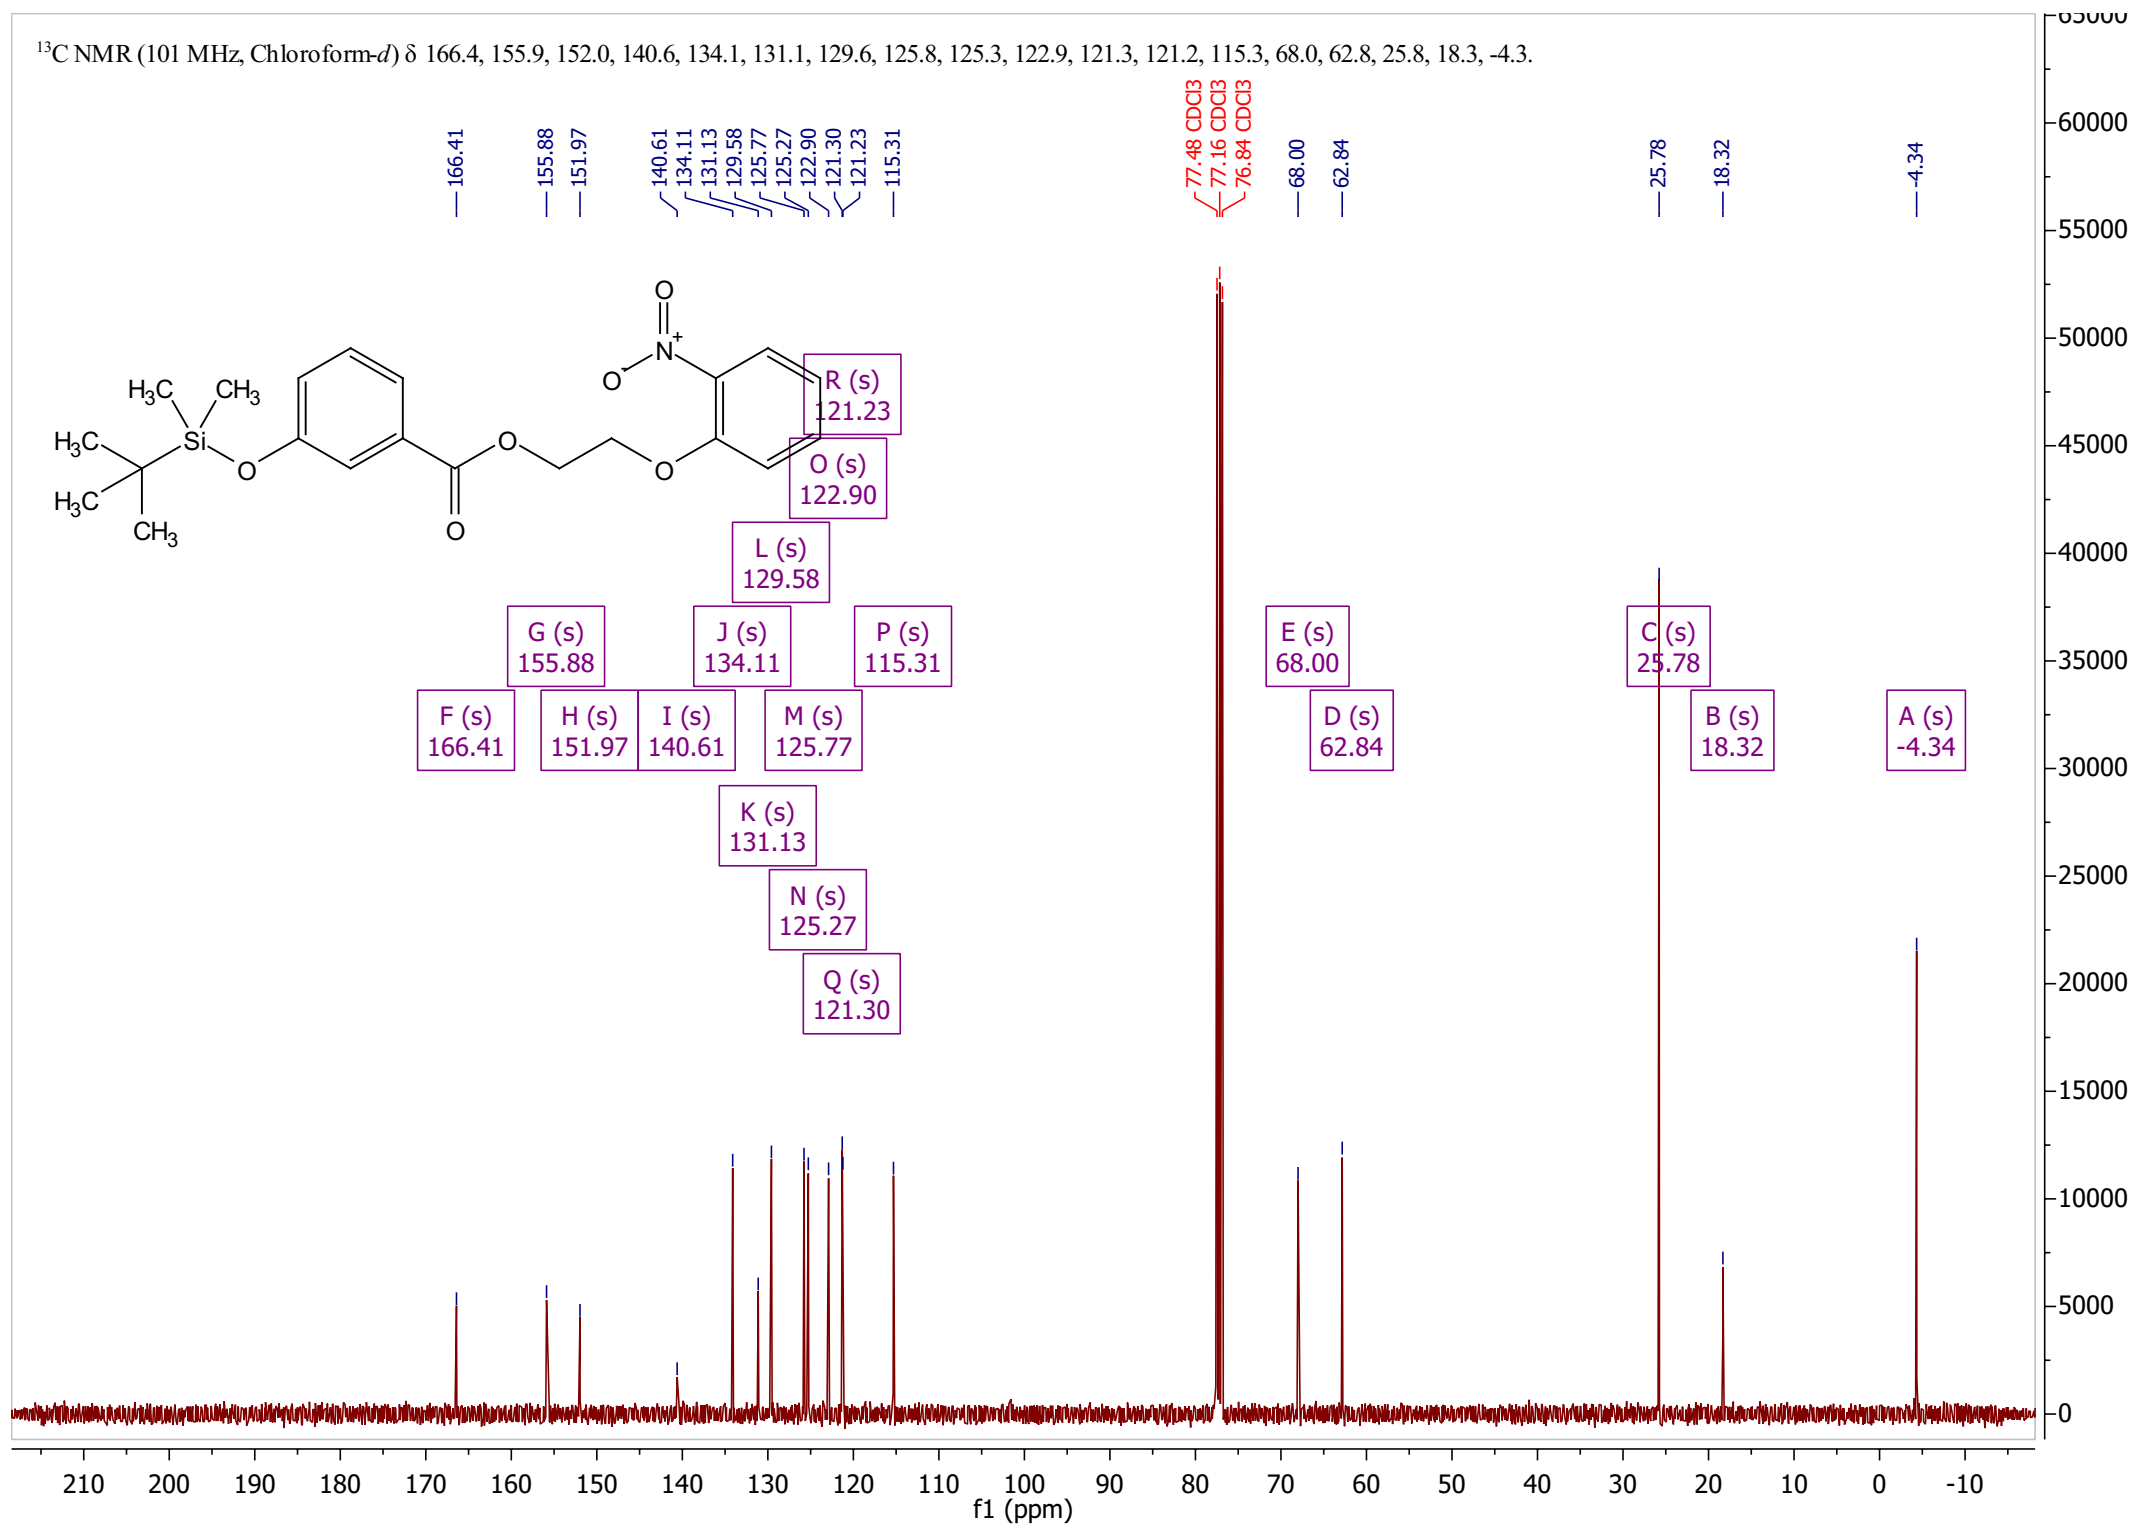

$^1\text{H}$  NMR (400 MHz,  $\text{DMSO-}d_6$ )  $\delta$  9.85 (s, 1H), 7.44 – 7.37 (m, 2H), 7.32 (t,  $J = 7.9$  Hz, 1H), 7.04 (d,  $J = 7.8$  Hz, 1H), 6.84 (d,  $J = 7.8$  Hz, 1H), 6.70 (t,  $J = 7.4$  Hz, 1H), 6.64 (d,  $J = 6.4$  Hz, 1H), 6.51 (t,  $J = 6.8$  Hz, 1H), 4.67 (s, 2H), 4.59 (t,  $J = 4.6$  Hz, 2H), 4.26 (t,  $J = 4.6$  Hz, 2H).

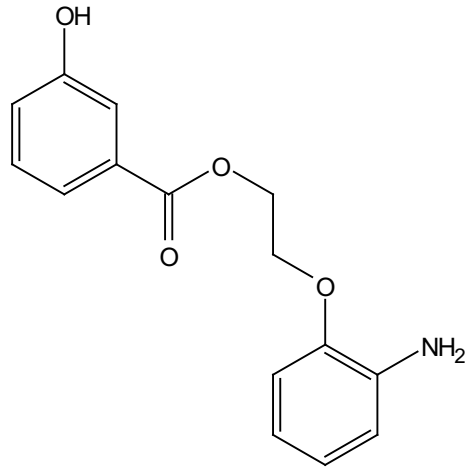

9.85  
7.43  
7.41  
7.40  
7.39  
7.33  
7.32  
7.30  
7.05  
7.03  
6.85  
6.83  
6.72  
6.70  
6.68  
6.65  
6.63  
6.53  
6.51  
6.50  
4.67  
4.60  
4.59  
4.58  
4.27  
4.26  
4.24  
3.40 HDO  
2.51 DMSO  
2.50 DMSO  
2.50 DMSO

K (s)  
9.85

E (m)  
7.41

D (t)  
7.32  
J(7.90)

F (d)  
7.04  
J(7.79)

G (d)  
6.84  
J(7.82)

I (d)  
6.64  
J(6.35)

H (t)  
6.70  
J(7.36)

J (t)  
6.51  
J(6.83)

C (s)  
4.67

A (t)  
4.26  
J(4.61)

B (t)  
4.59  
J(4.58)

1.01

2.02  
1.04  
1.03  
1.02  
1.01  
1.00  
1.01

3.99  
2.00

16 15 14 13 12 11 10 9 8 7 6 5 4 3 2 1 0 -1 -2 -3 -4  
f1 (ppm)

23000000  
22000000  
21000000  
20000000  
19000000  
18000000  
17000000  
16000000  
15000000  
14000000  
13000000  
12000000  
11000000  
10000000  
9000000  
8000000  
7000000  
6000000  
5000000  
4000000  
3000000  
2000000  
1000000  
0  
-1000000



$^{13}\text{C}$  NMR (101 MHz, DMSO- $d_6$ )  $\delta$  165.9, 157.5, 145.2, 138.1, 130.9, 129.9, 121.6, 120.5, 120.0, 116.3, 115.7, 114.2, 112.6, 66.6, 63.5.

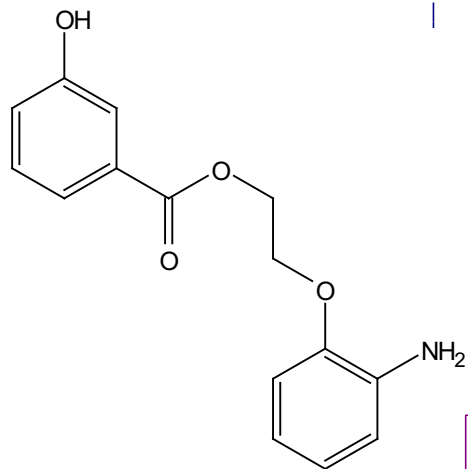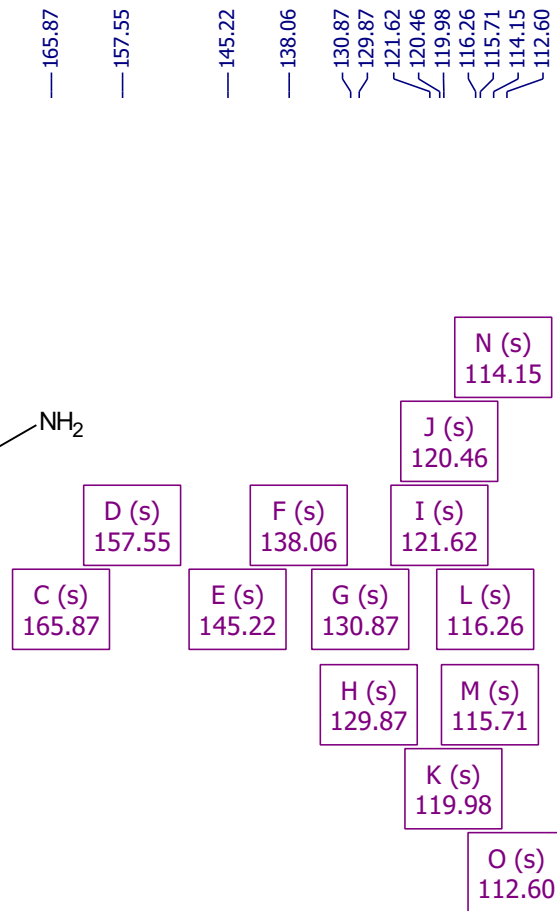

40.15 DMSO  
39.99 DMSO  
39.94 DMSO  
39.78 DMSO  
39.73 DMSO  
39.52 DMSO  
39.31 DMSO  
39.10 DMSO  
38.90 DMSO

210 200 190 180 170 160 150 140 130 120 110 100 90 80 70 60 50 40 30 20 10 0 -10  
f1 (ppm)

$^1\text{H}$  NMR (400 MHz, Acetonitrile- $d_3$ )  $\delta$  8.14 (dd,  $J = 8.9, 4.9$  Hz, 2H), 7.55 (d,  $J = 33.7$  Hz, 1H), 7.30 (t,  $J = 8.6$  Hz, 2H).

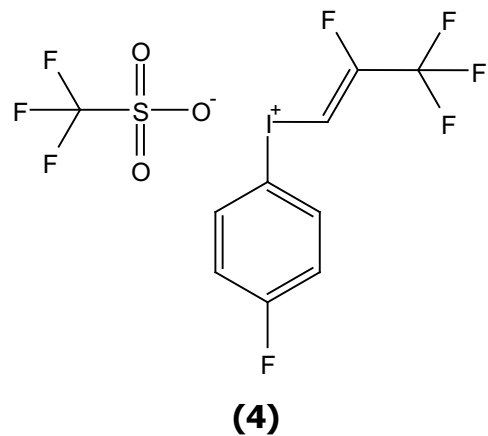

8.16  
8.15  
8.14  
8.12  
7.59  
7.50  
7.32  
7.30  
7.28

2.53 HDO  
1.95 CD $_3$ CN  
1.95 CD $_3$ CN  
1.94 CD $_3$ CN  
1.93 CD $_3$ CN  
1.93 CD $_3$ CN

B (dd)  
8.14  
J(8.86, 4.91)

A (d)  
7.55  
J(33.75)

C (t)  
7.30  
J(8.65)

2.00  
0.91  
2.02

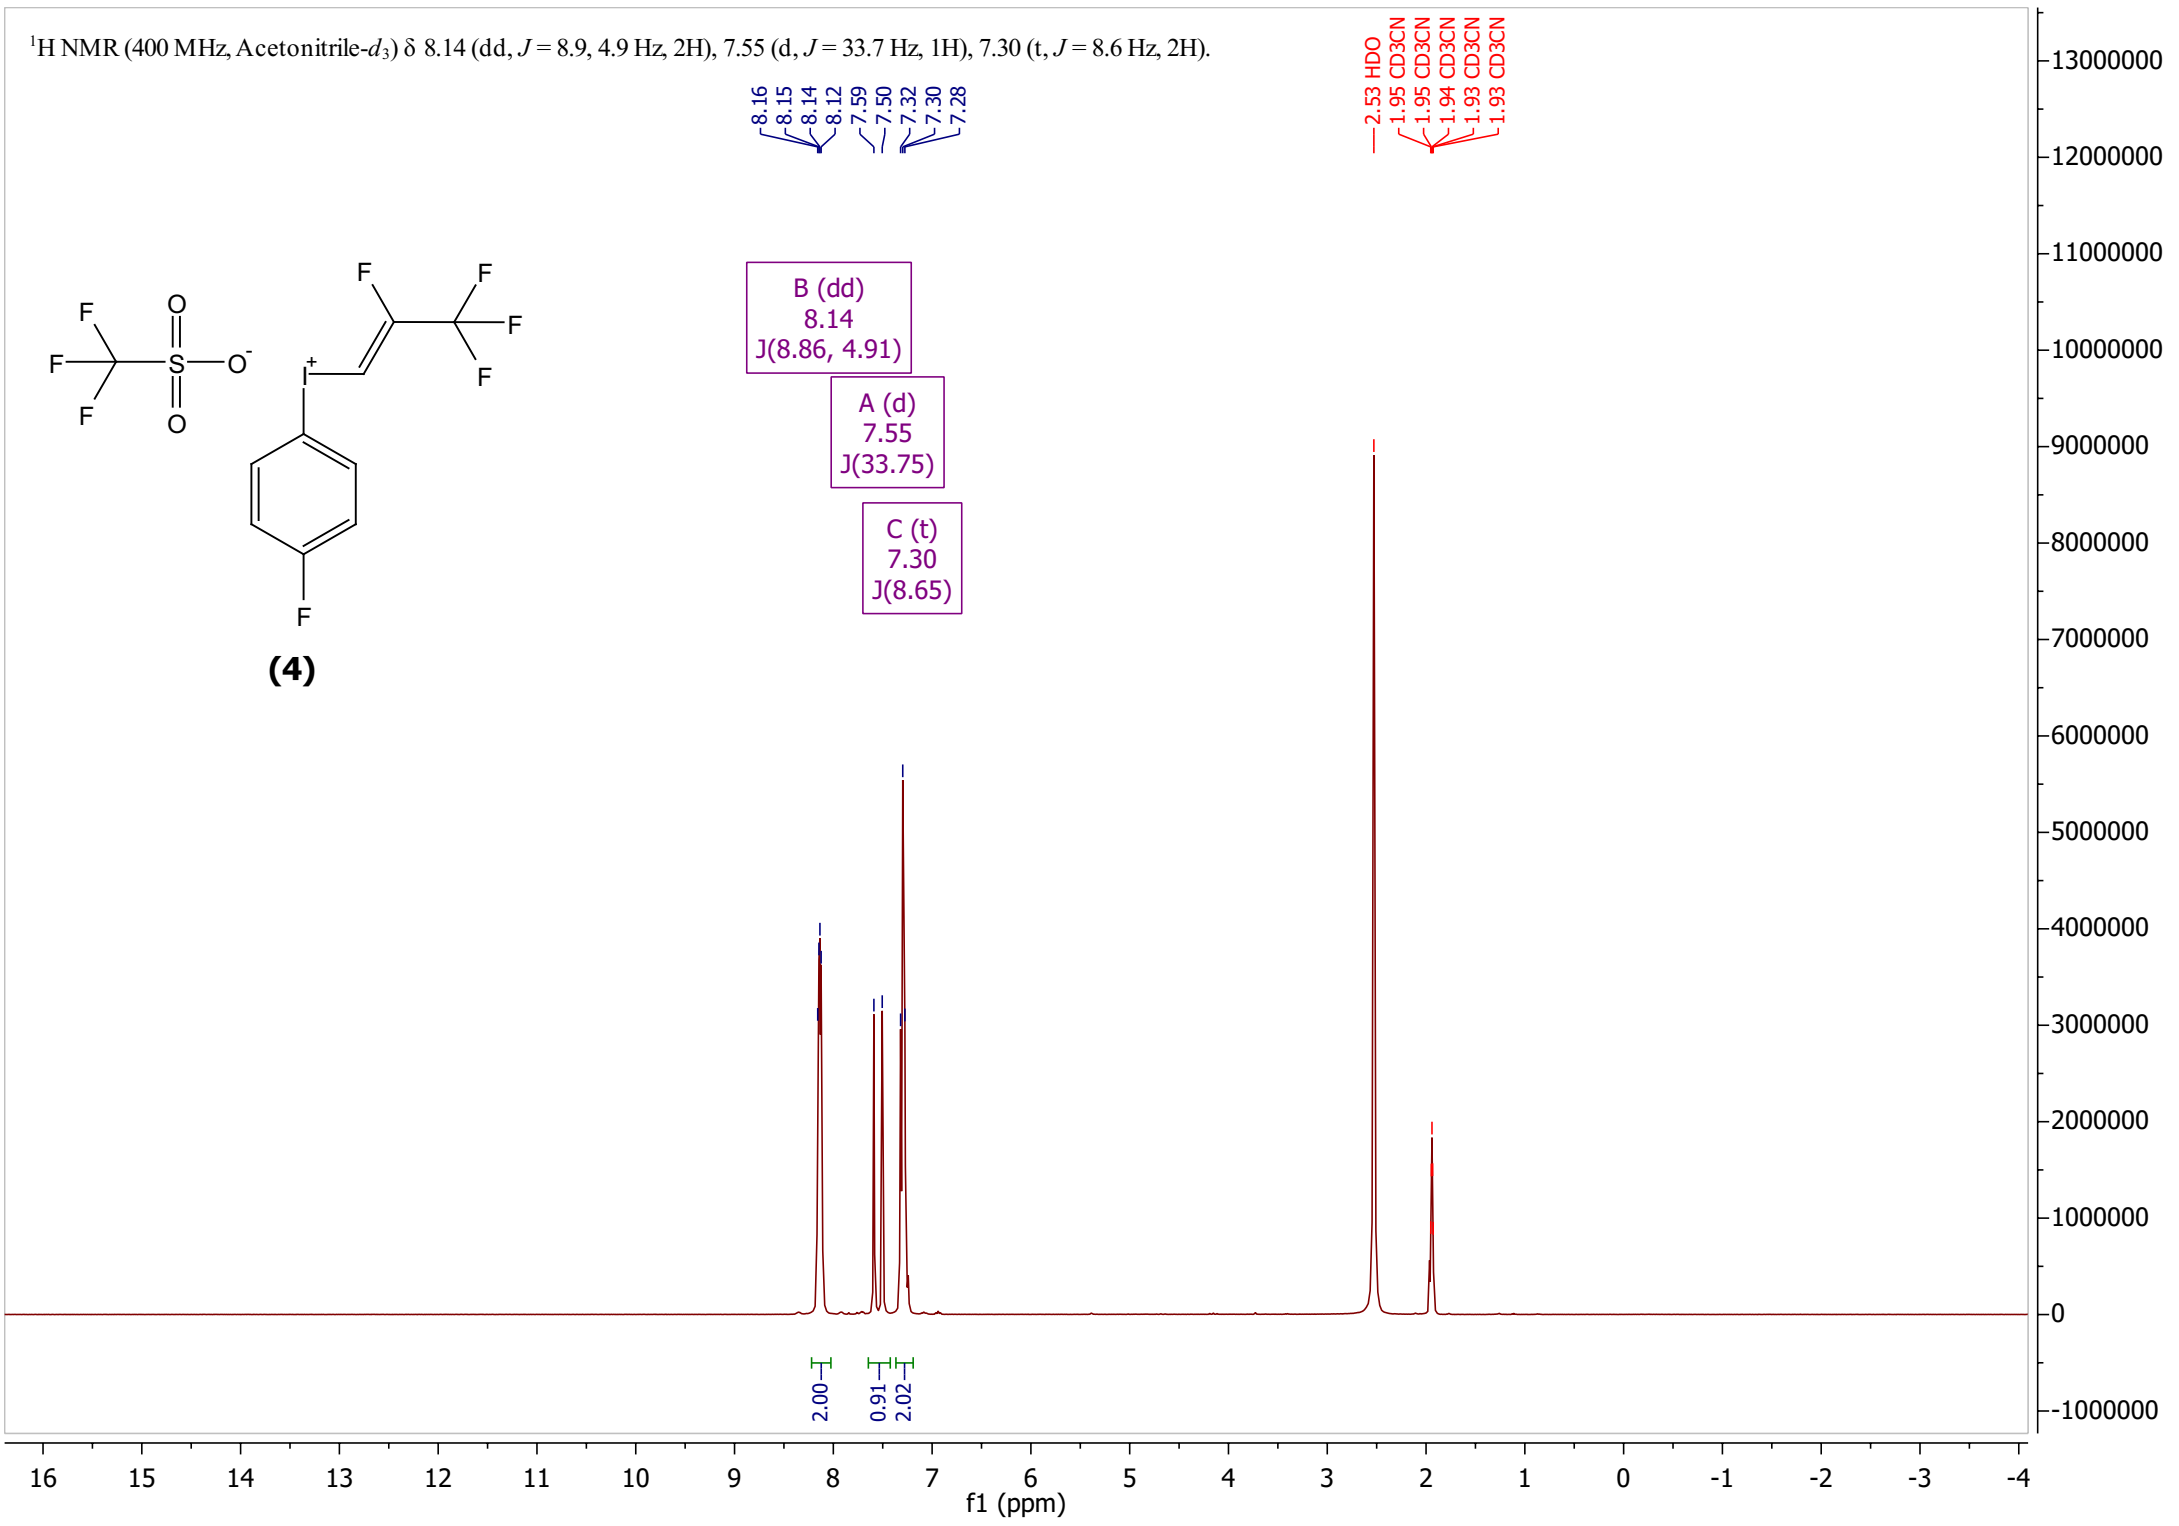

$^{19}\text{F}$  NMR (376 MHz, Acetonitrile- $d_3$ )  $\delta$  -72.4 (d,  $J = 10.4$  Hz), -79.3, -102.1 (q,  $J = 10.5$  Hz), -106.2.

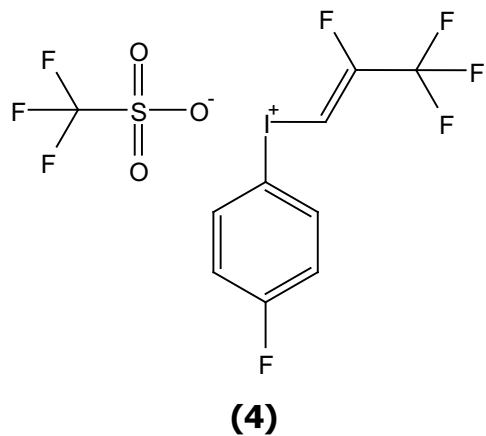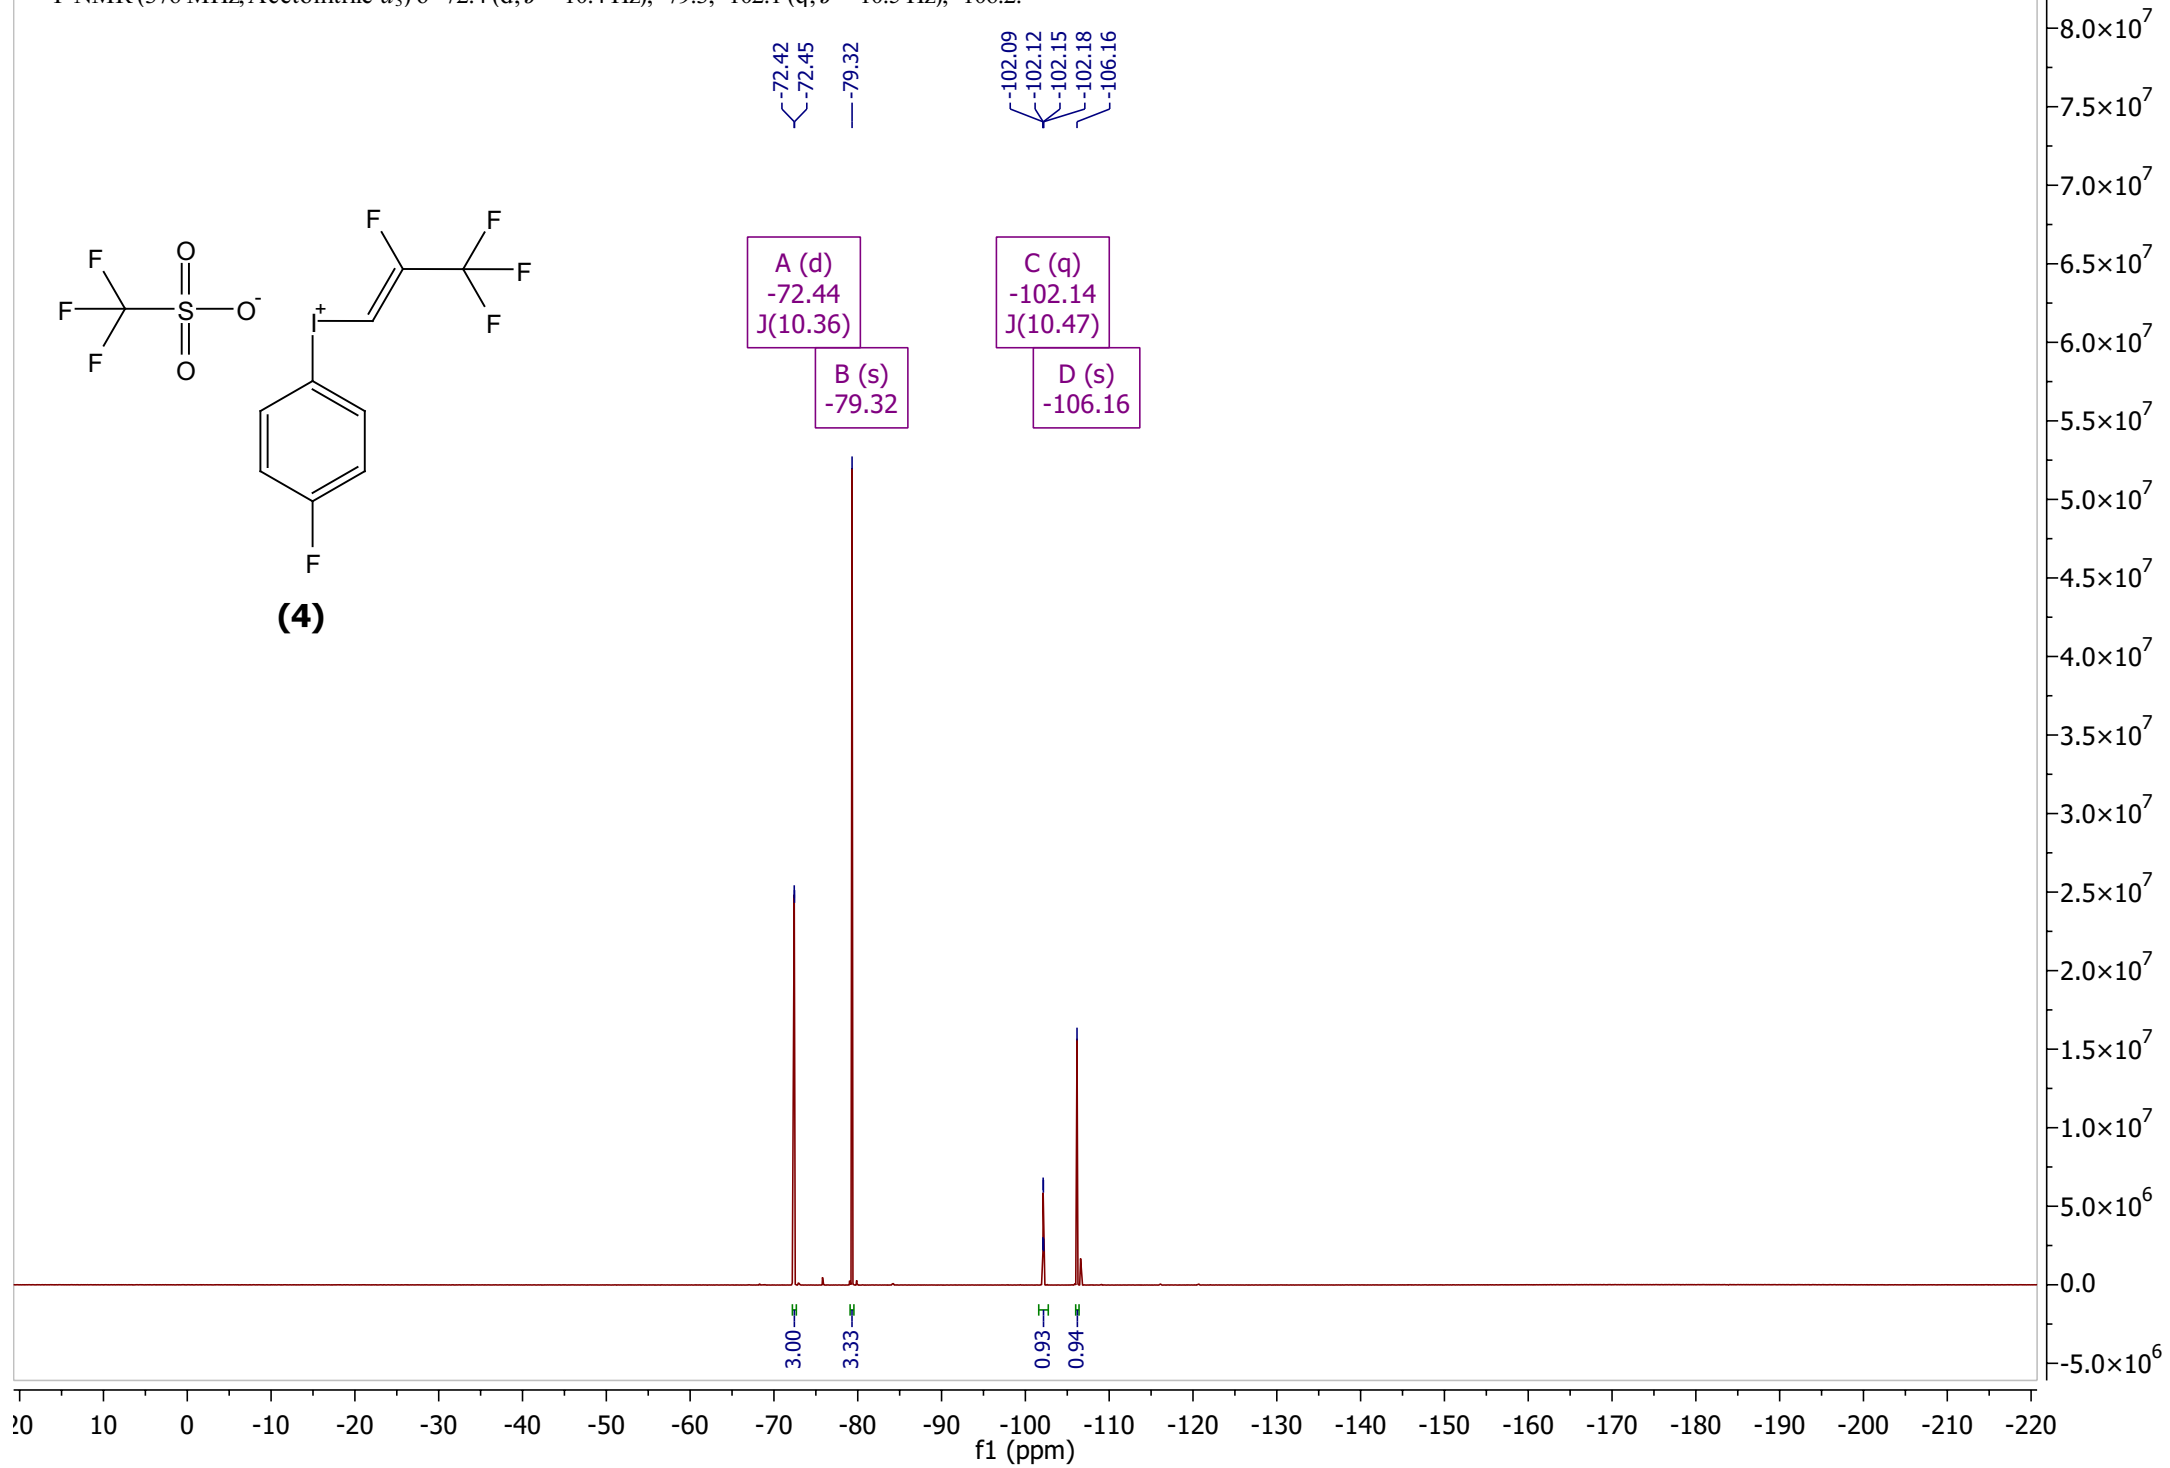

$^{13}\text{C}$  NMR (101 MHz, Acetonitrile- $d_3$ )  $\delta$  166.0 (d,  $J = 253.7$  Hz), 153.3 (dq,  $J = 273.7, 41.8$  Hz), 139.9 (d,  $J = 9.4$  Hz), 121.7 (q,  $J = 319.8$  Hz), 120.7 (d,  $J = 23.6$  Hz), 117.1 (qd,  $J = 274.6, 42.7$  Hz), 109.6 (d,  $J = 3.0$  Hz), 91.9 (dd,  $J = 15.6, 3.6$  Hz).

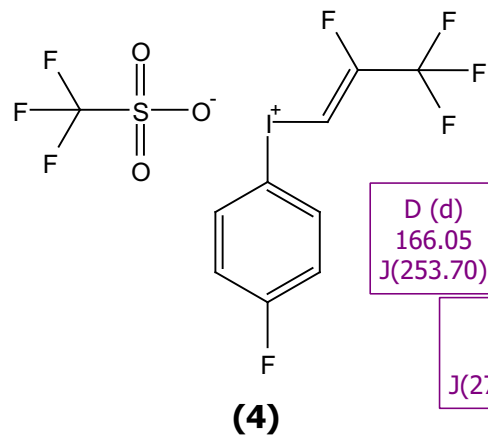

167.31  
164.78  
155.26  
154.84  
154.43  
154.02  
152.54  
152.12  
151.71  
151.30  
139.93  
139.84  
126.48  
123.30  
121.57  
121.15  
120.80  
120.56  
120.12  
118.84  
118.45 CD3CN  
116.94  
116.11  
115.69  
113.38  
112.96  
109.61  
109.58  
92.02  
91.98  
91.86  
91.83

1.94 CD3CN  
1.73 CD3CN  
1.53 CD3CN  
1.32 CD3CN  
1.11 CD3CN  
0.91 CD3CN  
0.70 CD3CN

D (d)  
166.05  
J(253.70)

B (dq)  
153.28  
J(273.67, 41.77)

C (d)  
139.88  
J(9.41)

E (d)  
120.68  
J(23.58)

A (q)  
121.71  
J(319.80)

H (qd)  
117.10  
J(274.60, 42.65)

F (dd)  
91.92  
J(15.59, 3.60)

G (d)  
109.60  
J(3.05)

210 200 190 180 170 160 150 140 130 120 110 100 90 80 70 60 50 40 30 20 10 0 -10  
f1 (ppm)

1900000  
1800000  
1700000  
1600000  
1500000  
1400000  
1300000  
1200000  
1100000  
1000000  
900000  
800000  
700000  
600000  
500000  
400000  
300000  
200000  
100000  
0  
-100000

$^1\text{H}$  NMR (400 MHz, Chloroform-*d*)  $\delta$  7.93 (d,  $J = 8.5$  Hz, 2H), 7.13 (d,  $J = 8.5$  Hz, 2H), 7.07 (t,  $J = 7.8$  Hz, 2H), 6.67 (t,  $J = 7.4$  Hz, 1H), 6.49 (d,  $J = 7.9$  Hz, 2H), 4.27 (q,  $J = 7.1$  Hz, 2H), 3.79–3.61 (m, 3H), 1.29 (t,  $J = 7.2$  Hz, 3H).

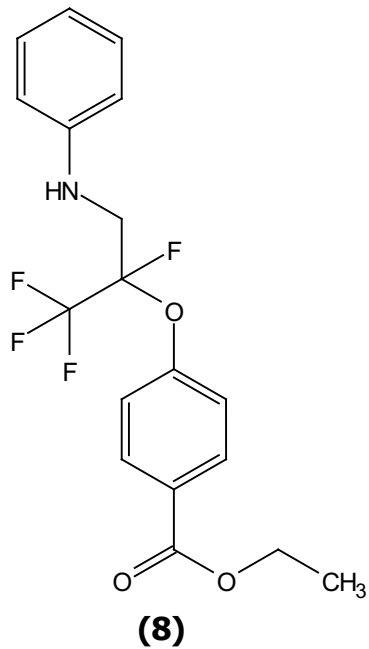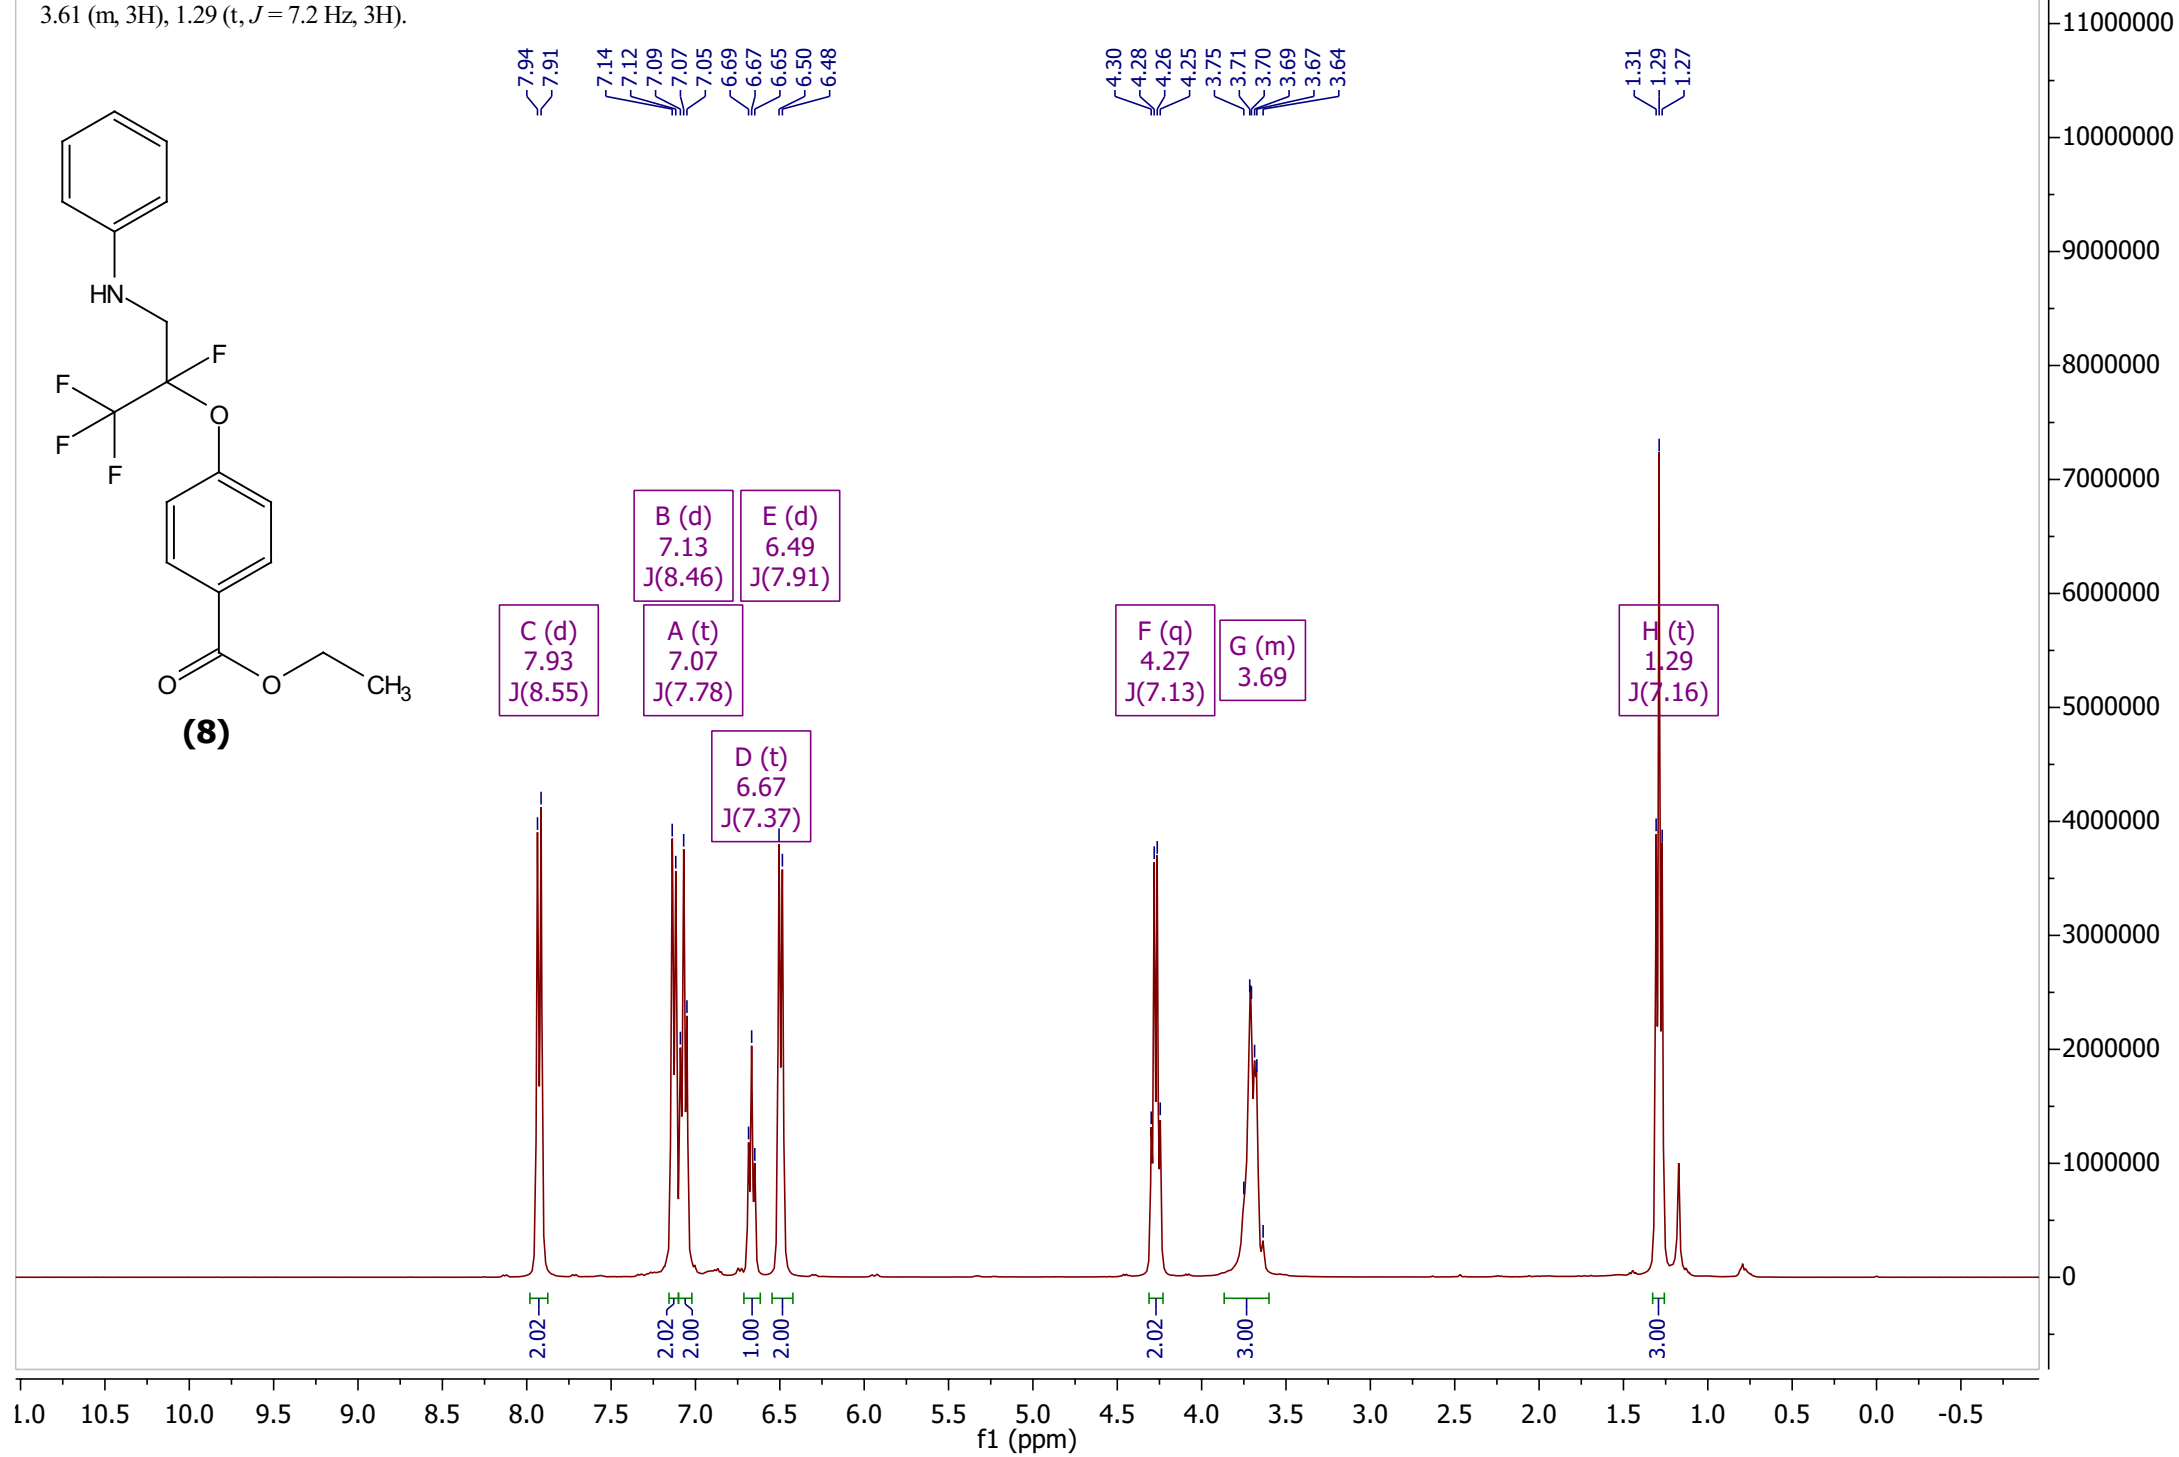

$^{19}\text{F}$  NMR (376 MHz, Chloroform-*d*)  $\delta$  -80.2 (d,  $J = 2.7$  Hz), -125.7 (q,  $J = 2.8$  Hz).

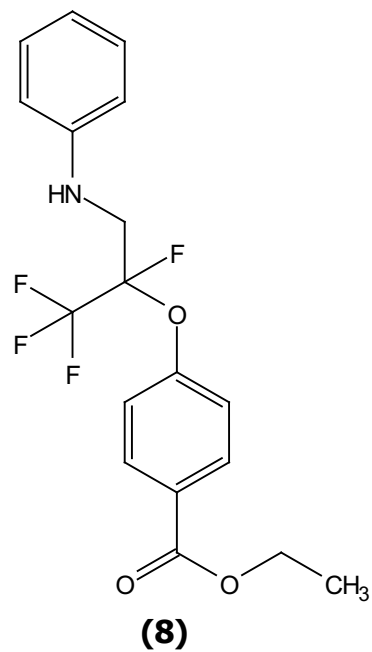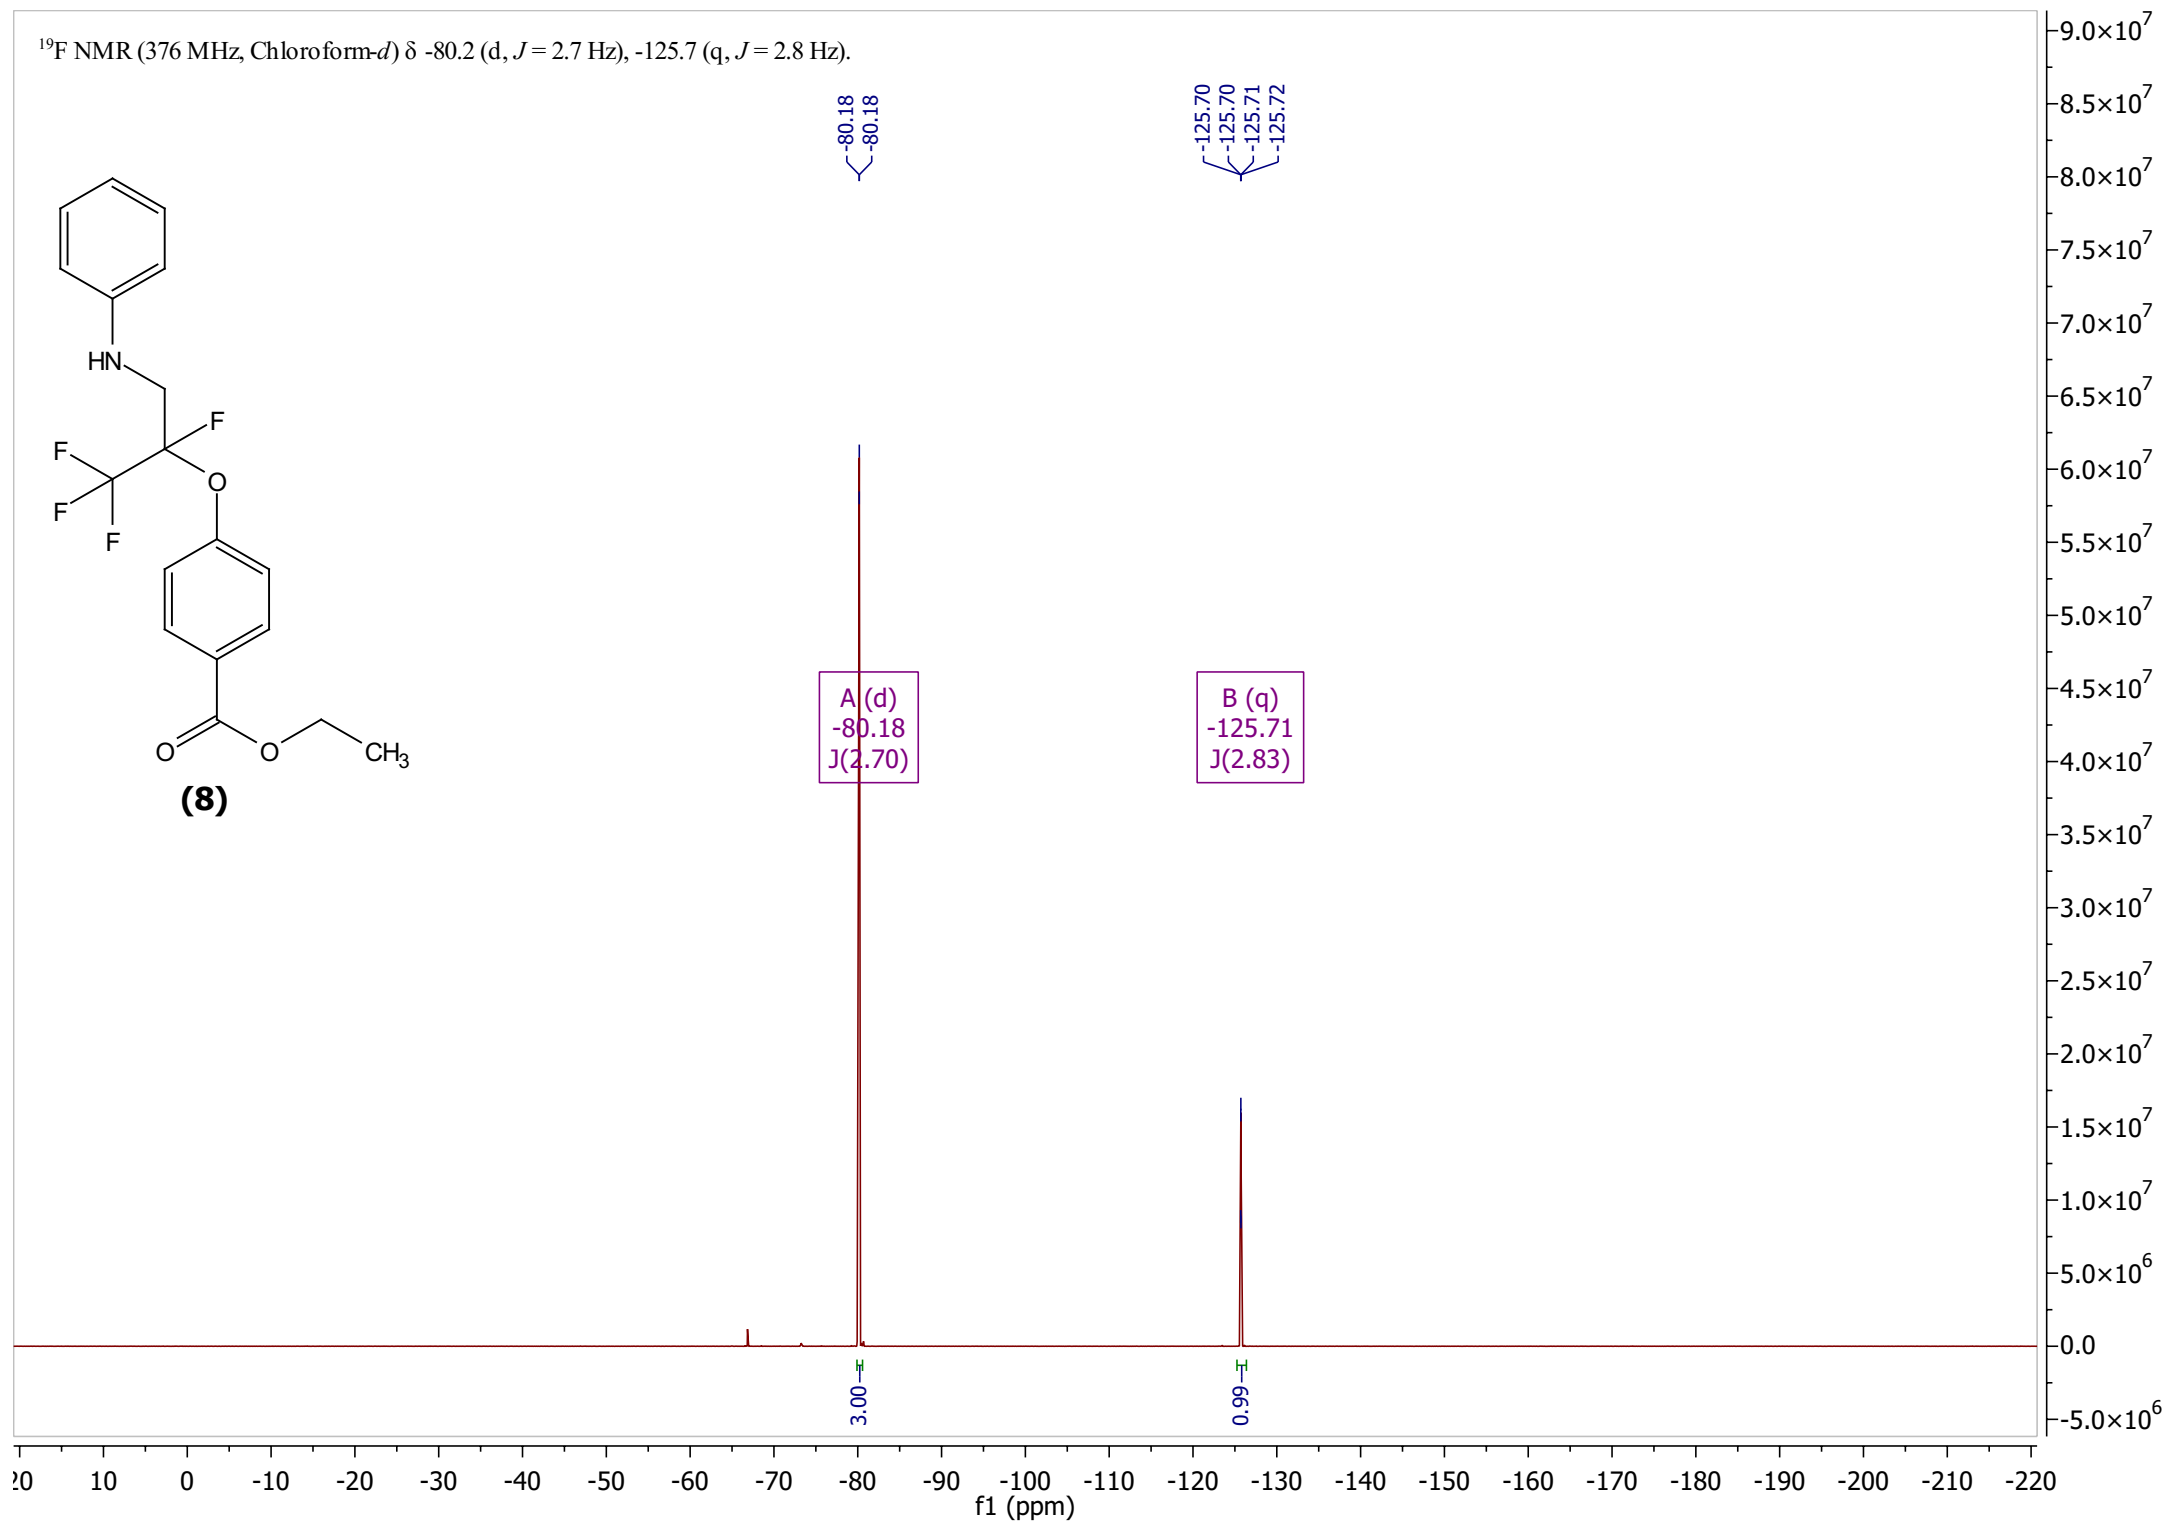

$^{13}\text{C}$  NMR (101 MHz, Chloroform- $d$ )  $\delta$  165.8, 155.4, 146.6, 131.4, 129.4, 128.2, 121.8 (d,  $J = 2.5$  Hz), 120.6 (qd,  $J = 288.1, 37.8$  Hz), 118.9, 113.3, 108.9 (dq,  $J = 241.5, 33.3$  Hz), 61.3, 45.1 (d,  $J = 28.4$  Hz), 14.4.

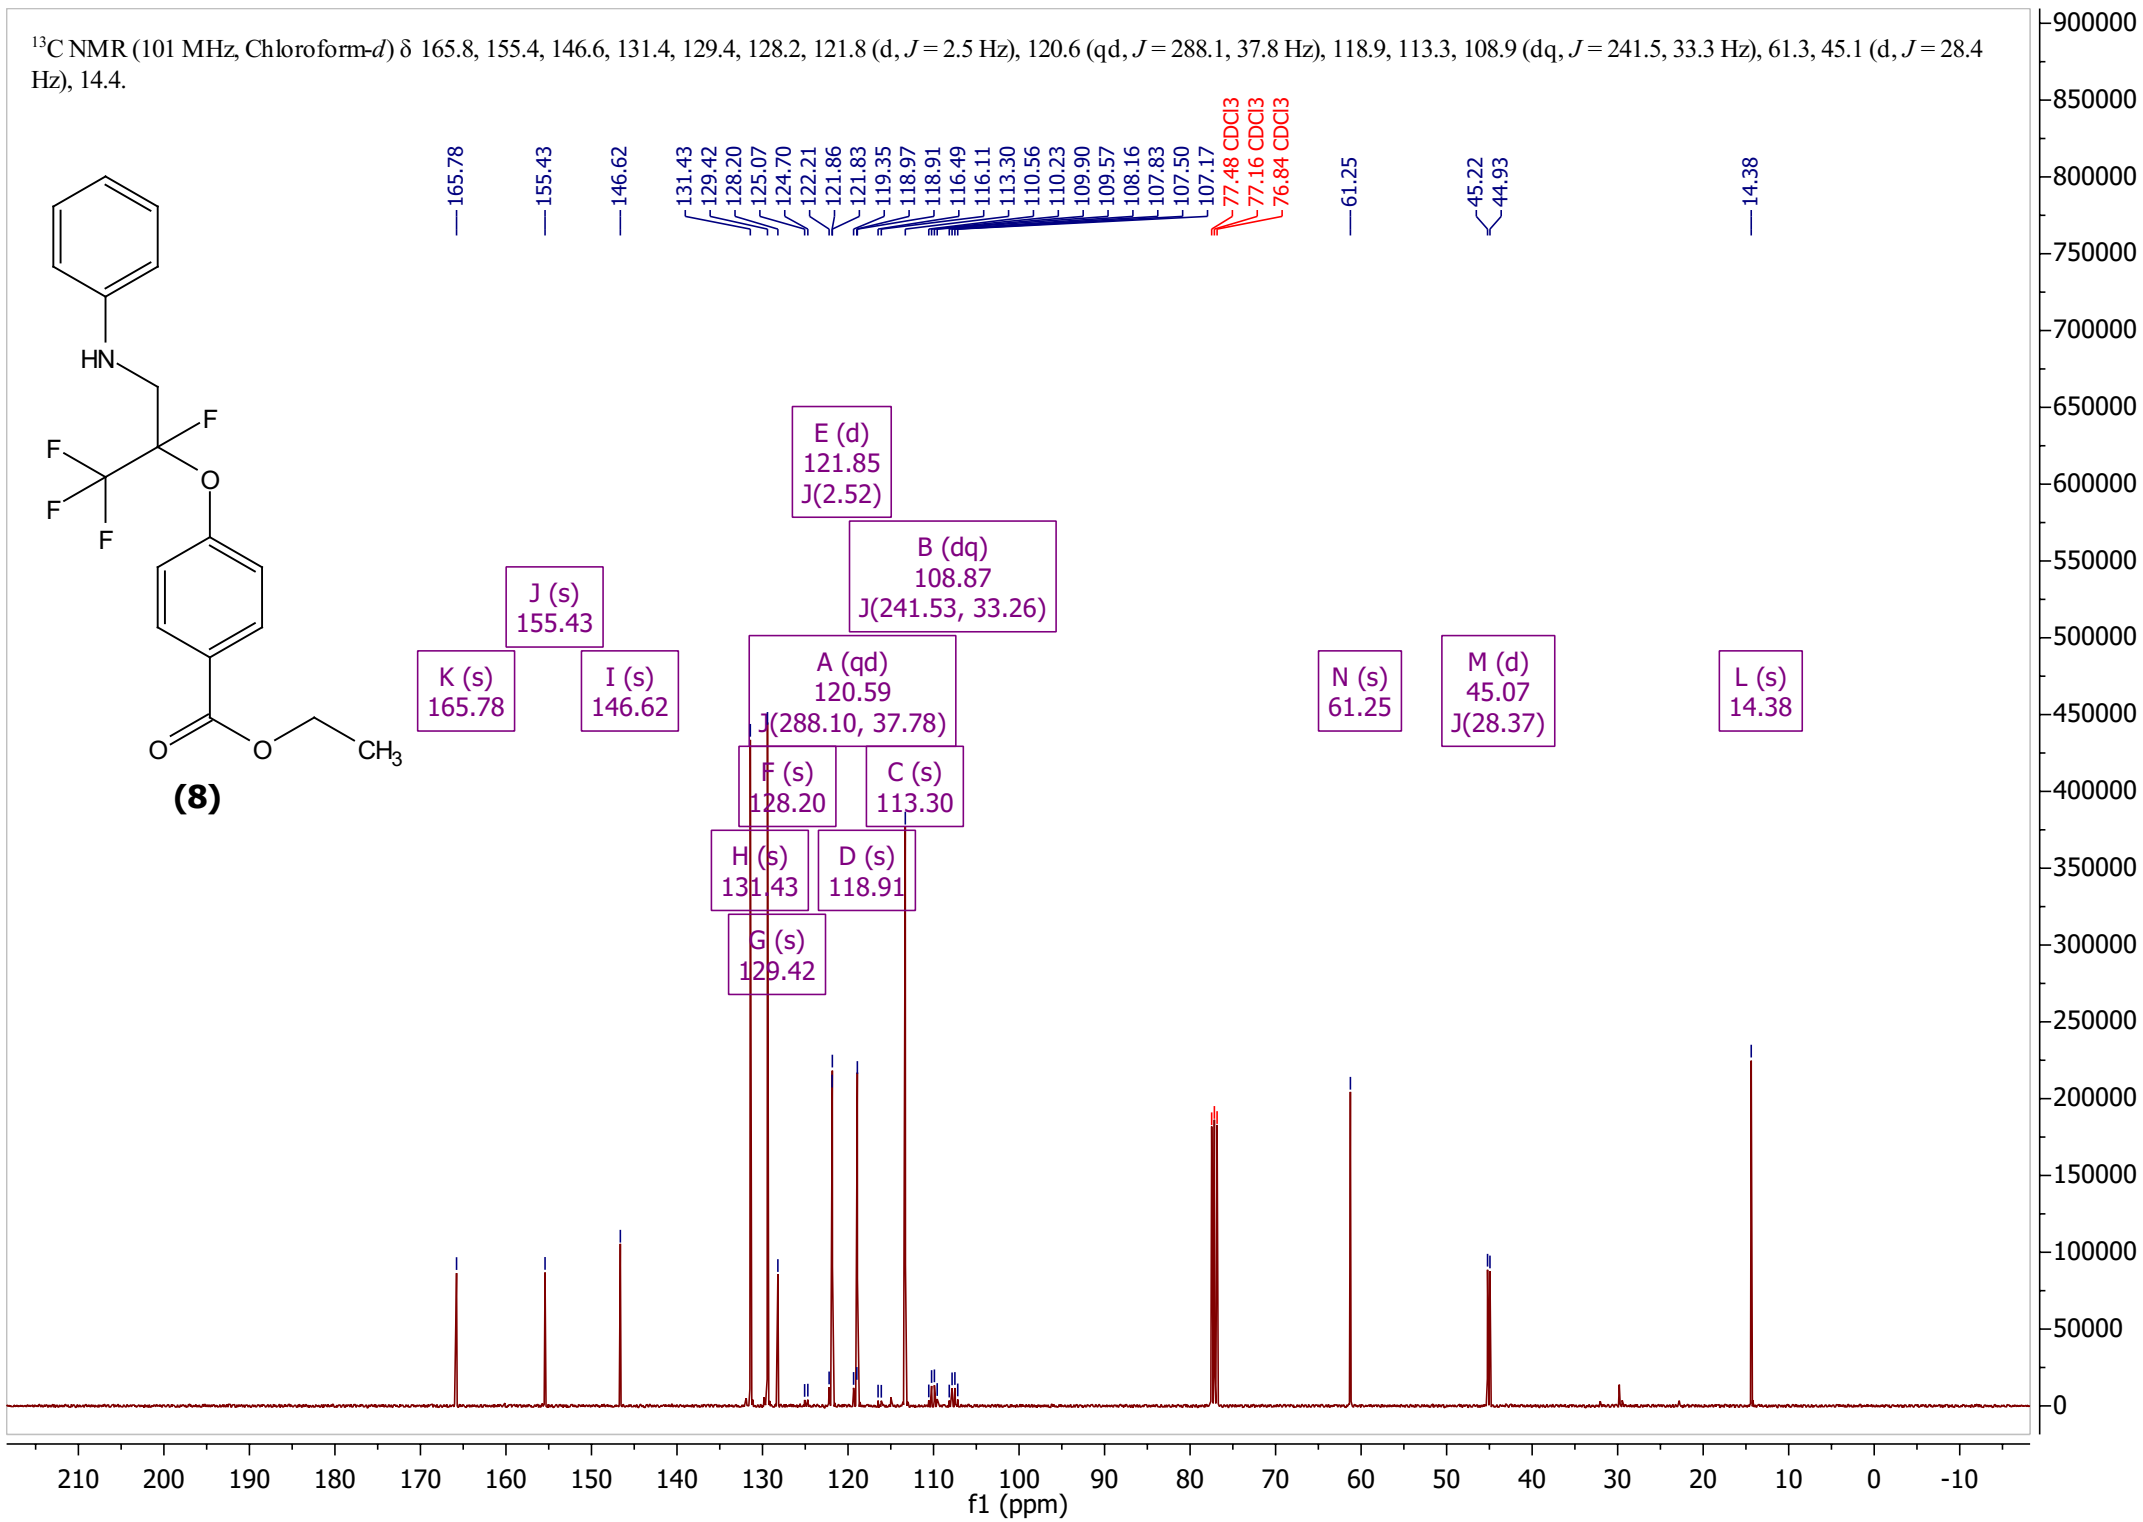

$^1\text{H}$  NMR (400 MHz, Chloroform- $d$ )  $\delta$  7.99 (d,  $J = 8.5$  Hz, 2H), 7.79 (d,  $J = 8.5$  Hz, 2H), 7.18 (d,  $J = 8.3$  Hz, 2H), 6.59 (d,  $J = 8.5$  Hz, 2H), 4.61 (s, 1H), 4.34 (q,  $J = 7.2$  Hz, 2H), 3.96 – 3.79 (m, 2H), 2.47 (s, 3H), 1.36 (t,  $J = 7.2$  Hz, 3H).

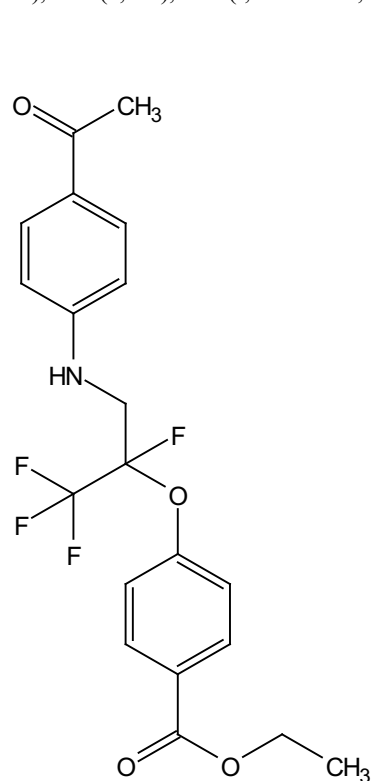

**(9)**

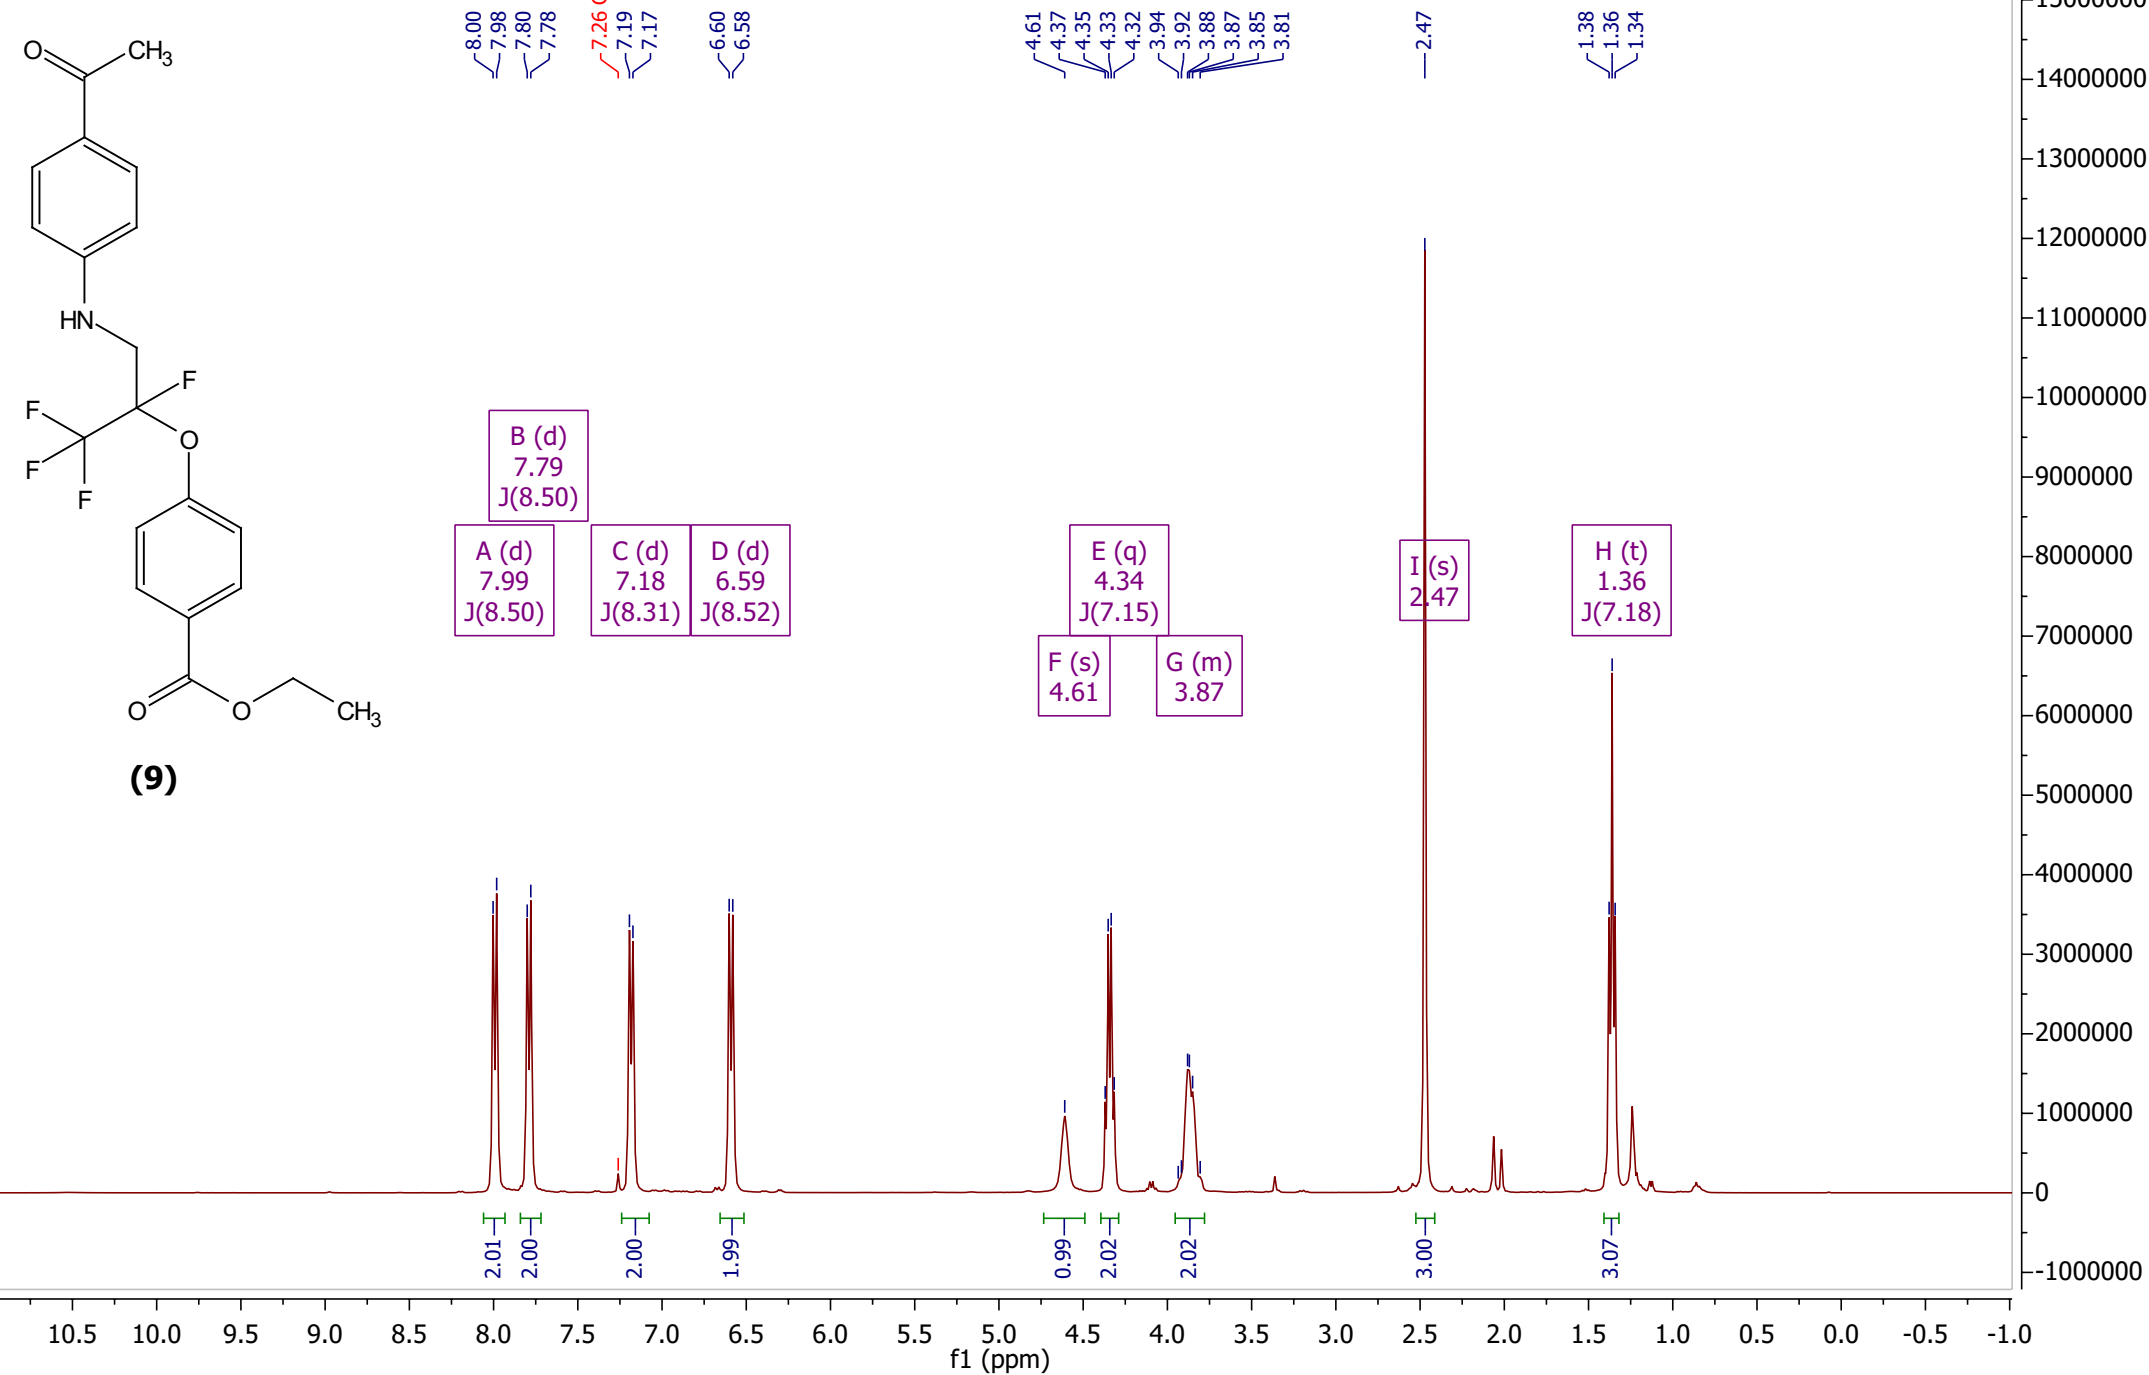



$^{19}\text{F}$  NMR (376 MHz, Chloroform-*d*)  $\delta$  -80.0 (d,  $J = 2.7$  Hz), -126.2 (q,  $J = 2.9$  Hz).

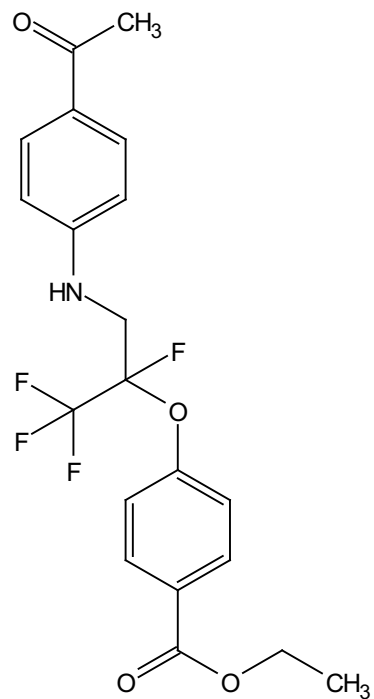

**(9)**

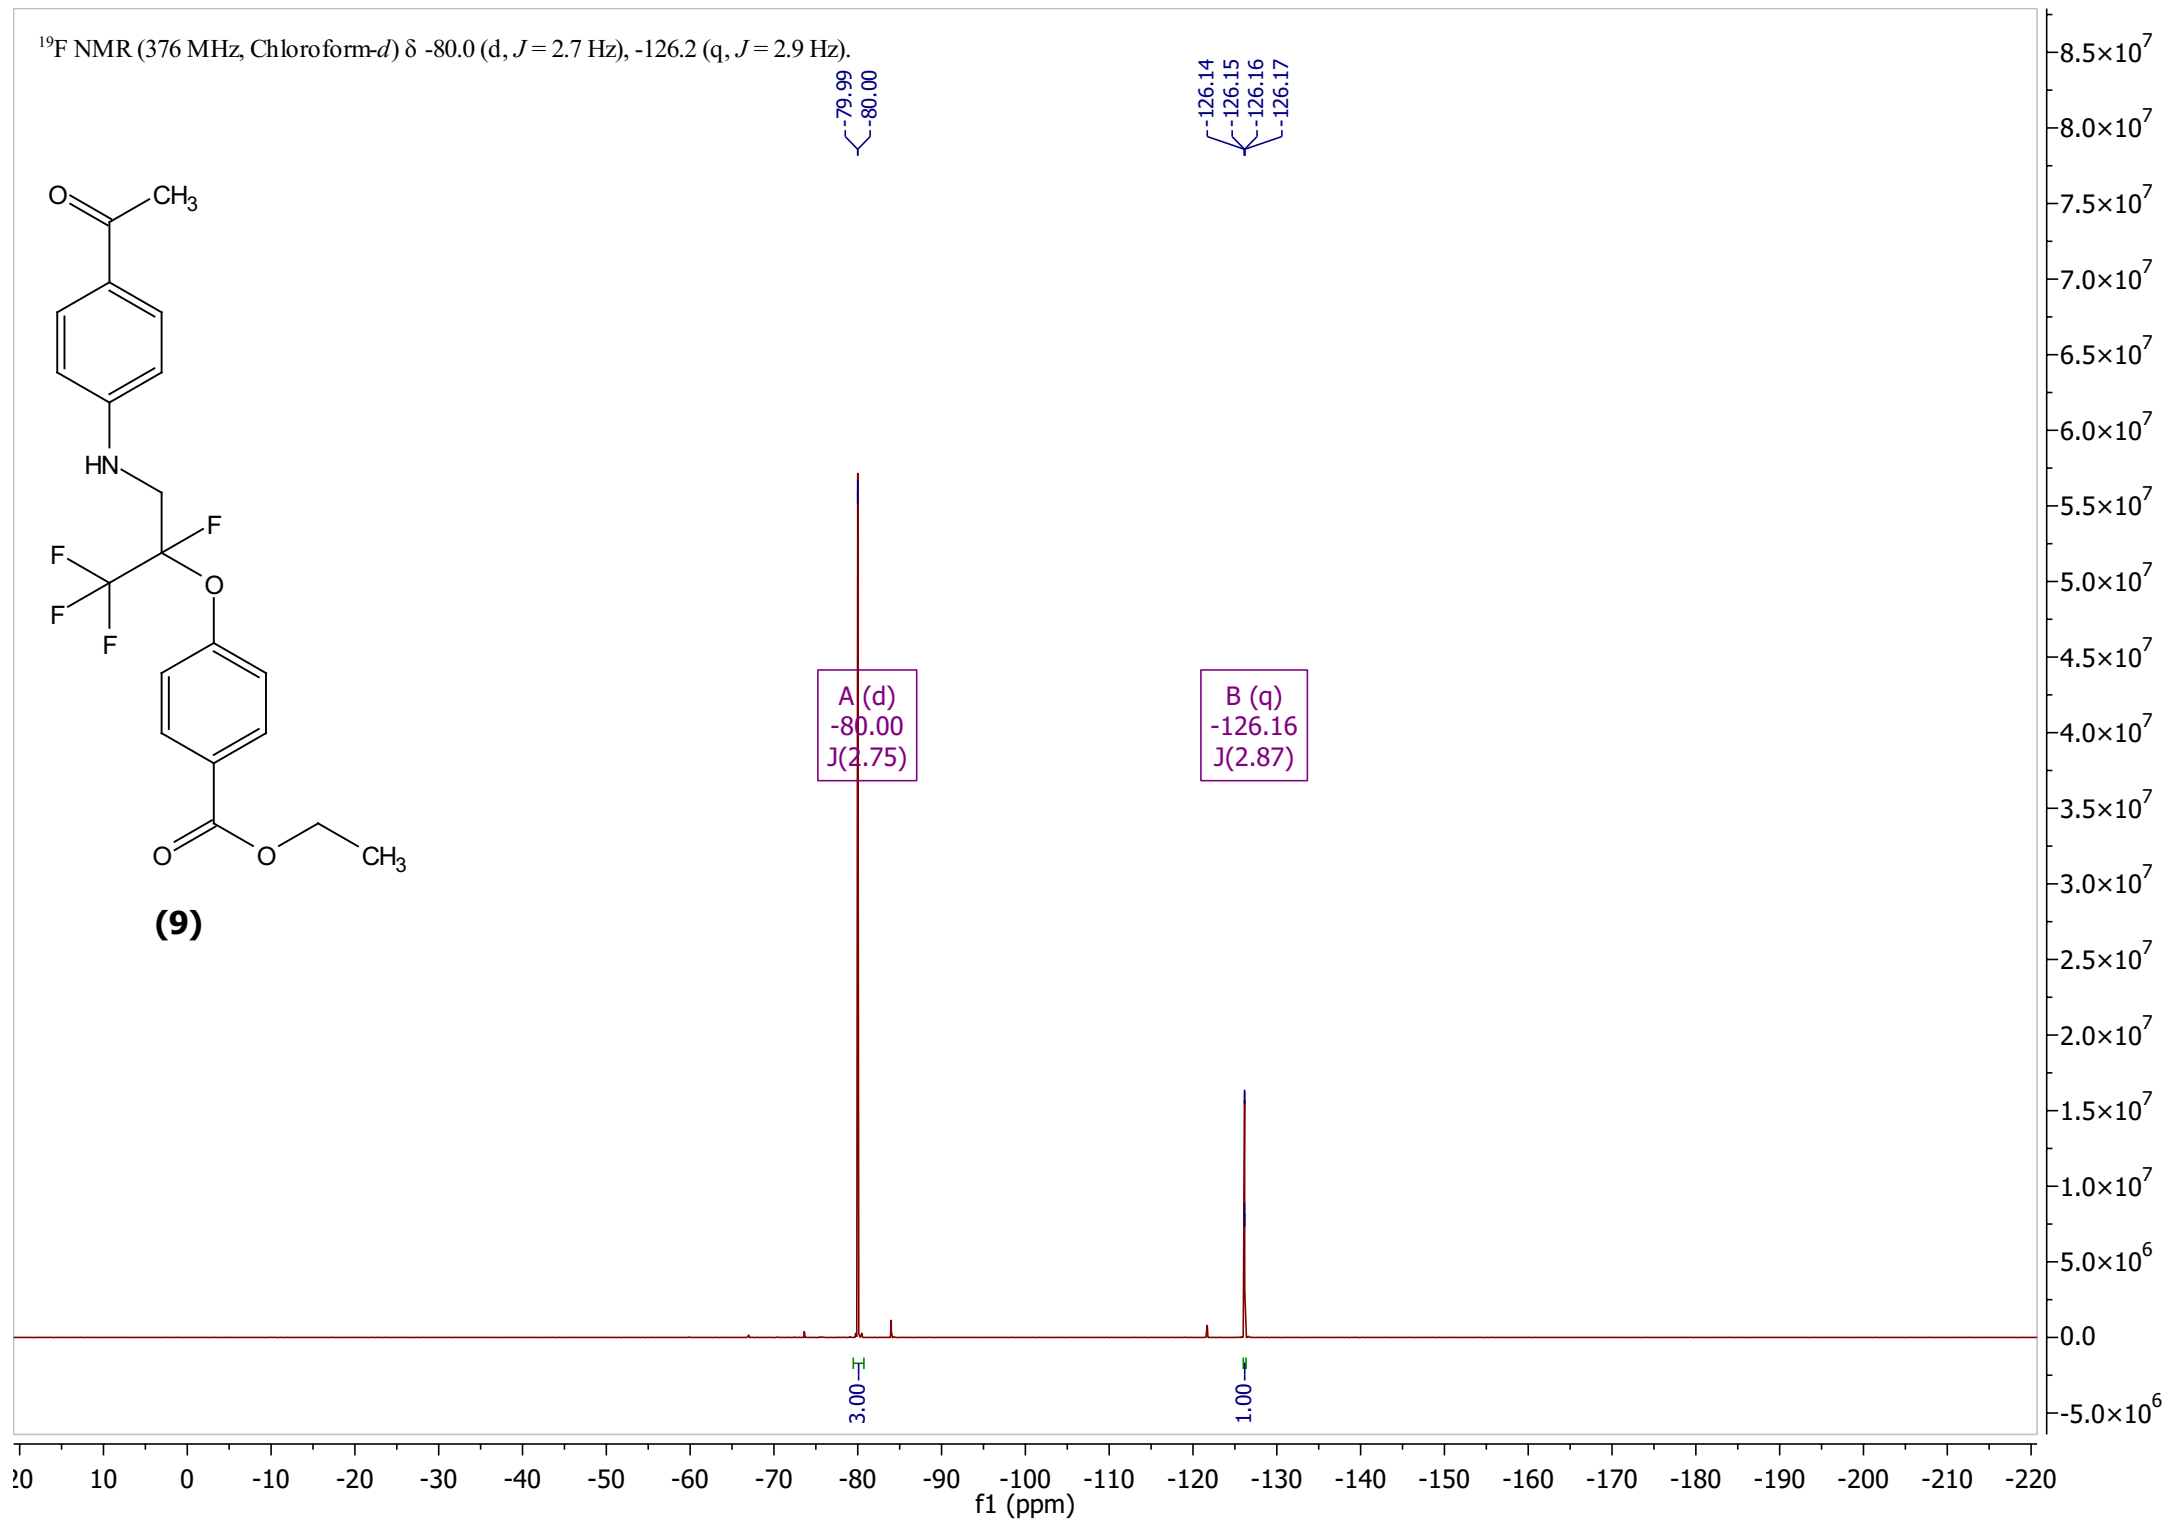

$^{13}\text{C}$  NMR (101 MHz, Chloroform-*d*)  $\delta$  196.6, 165.7, 155.3, 150.8, 131.4, 130.7, 128.3, 128.1, 121.7 (d,  $J = 2.5$  Hz), 120.4 (qd,  $J = 288.2, 38.1$  Hz), 112.0, 108.5 (dq,  $J = 242.0, 33.4$  Hz), 61.3, 44.3 (d,  $J = 27.8$  Hz), 26.1, 14.3.

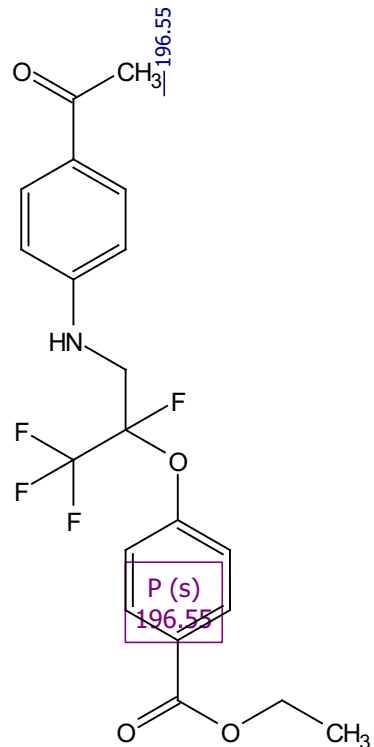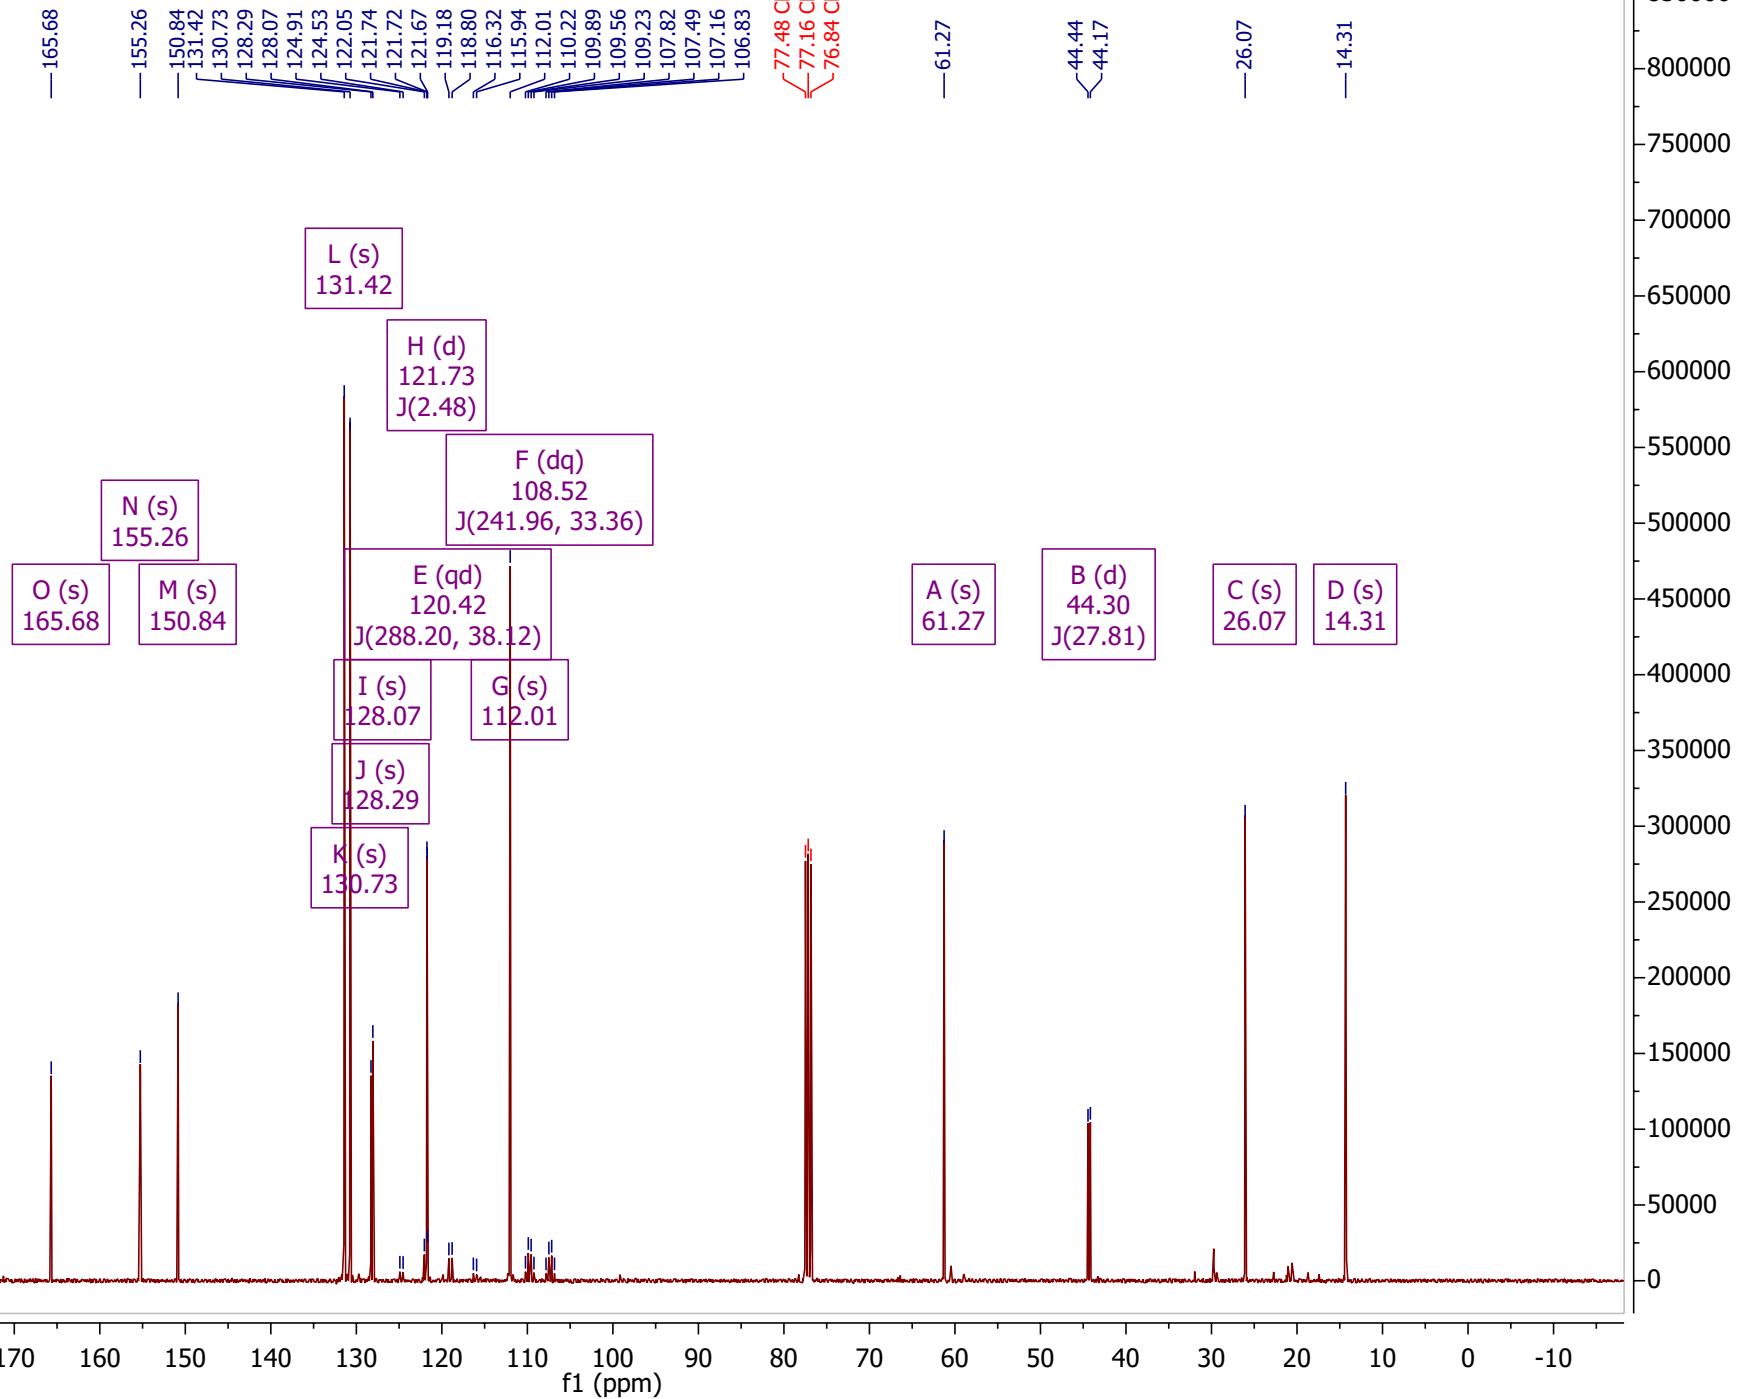

$^1\text{H}$  NMR (400 MHz, Chloroform-*d*)  $\delta$  8.02 (d,  $J = 8.4$  Hz, 2H), 7.21 (d,  $J = 8.4$  Hz, 2H), 7.11 (d,  $J = 8.8$  Hz, 2H), 6.52 (d,  $J = 8.5$  Hz, 2H), 4.37 (q,  $J = 7.2$  Hz, 2H), 3.89 (s, 1H), 3.84 – 3.69 (m, 2H), 1.39 (t,  $J = 7.2$  Hz, 3H).

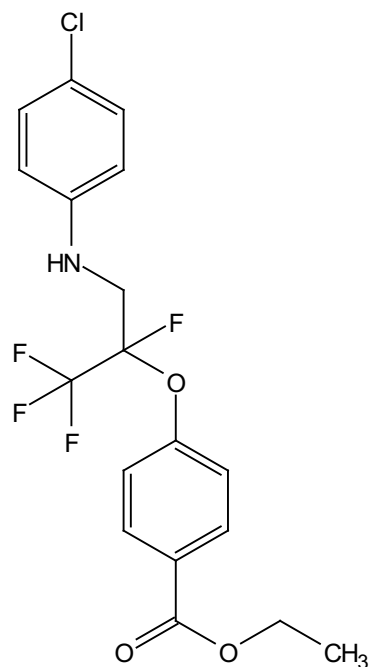

**(10)**

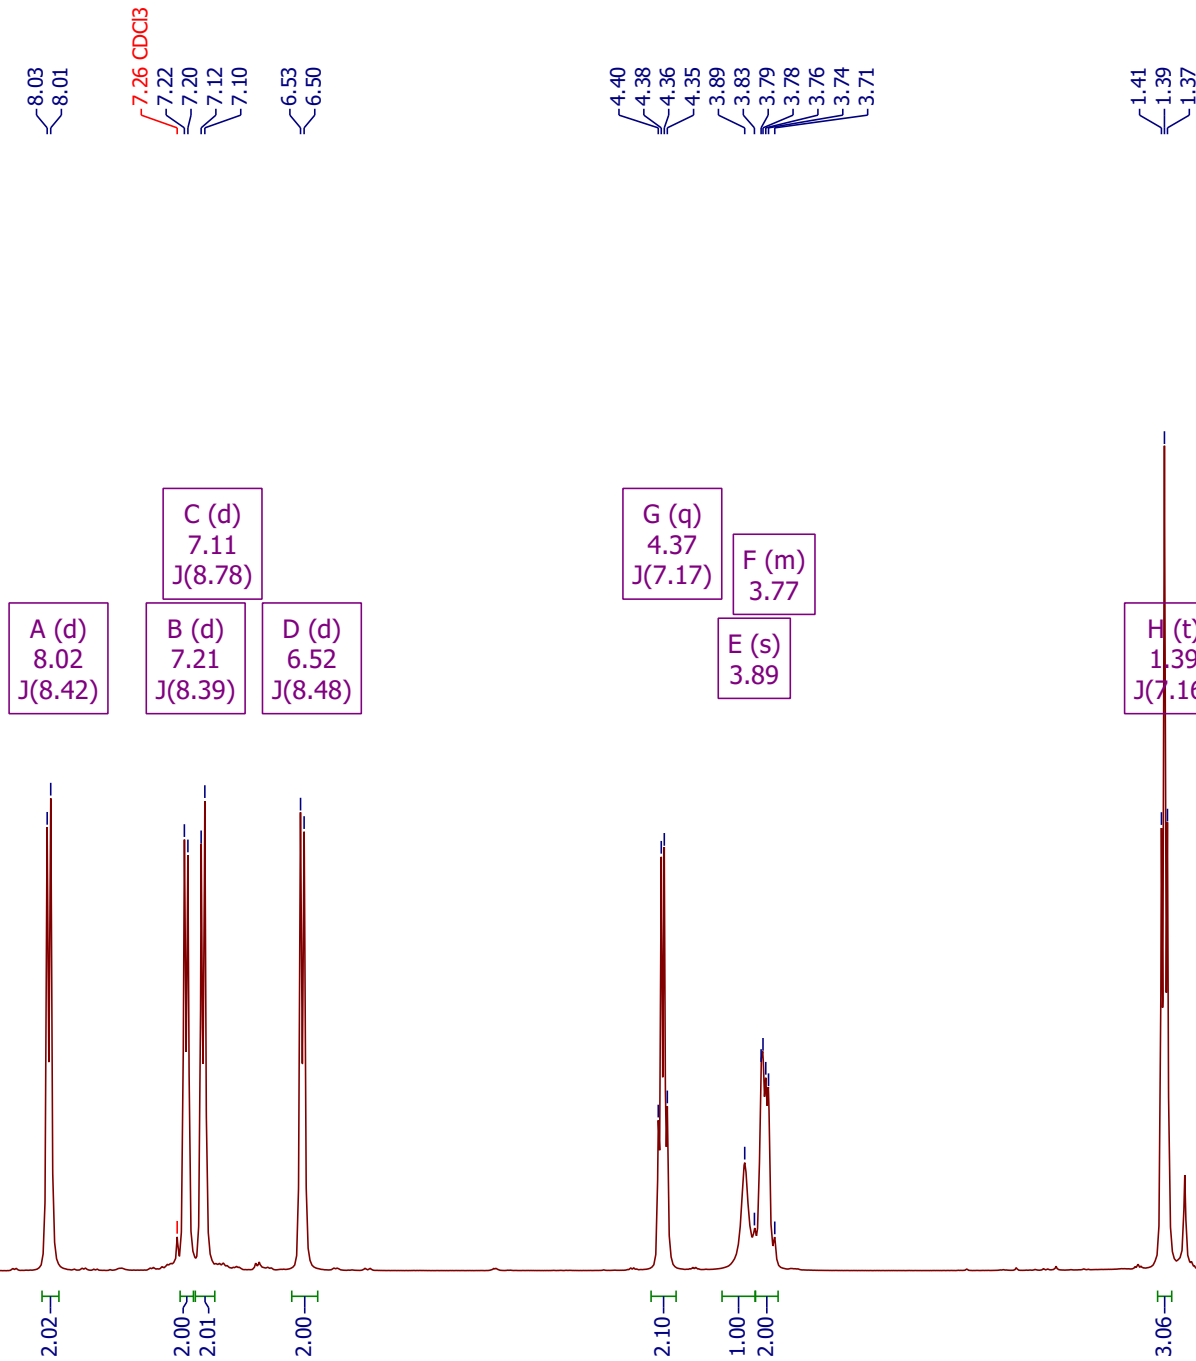

10.5 10.0 9.5 9.0 8.5 8.0 7.5 7.0 6.5 6.0 5.5 5.0 4.5 4.0 3.5 3.0 2.5 2.0 1.5 1.0 0.5 0.0 -0.5 -1.0  
f1 (ppm)

$^{19}\text{F}$  NMR (376 MHz, Chloroform-*d*)  $\delta$  -80.1 (d,  $J = 2.7$  Hz), -125.8 (q,  $J = 2.6$  Hz).

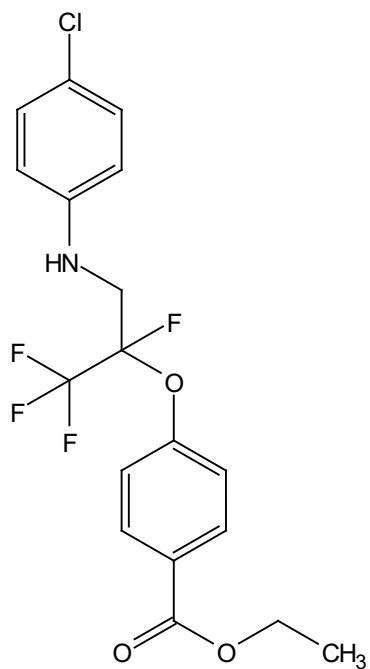

**(10)**

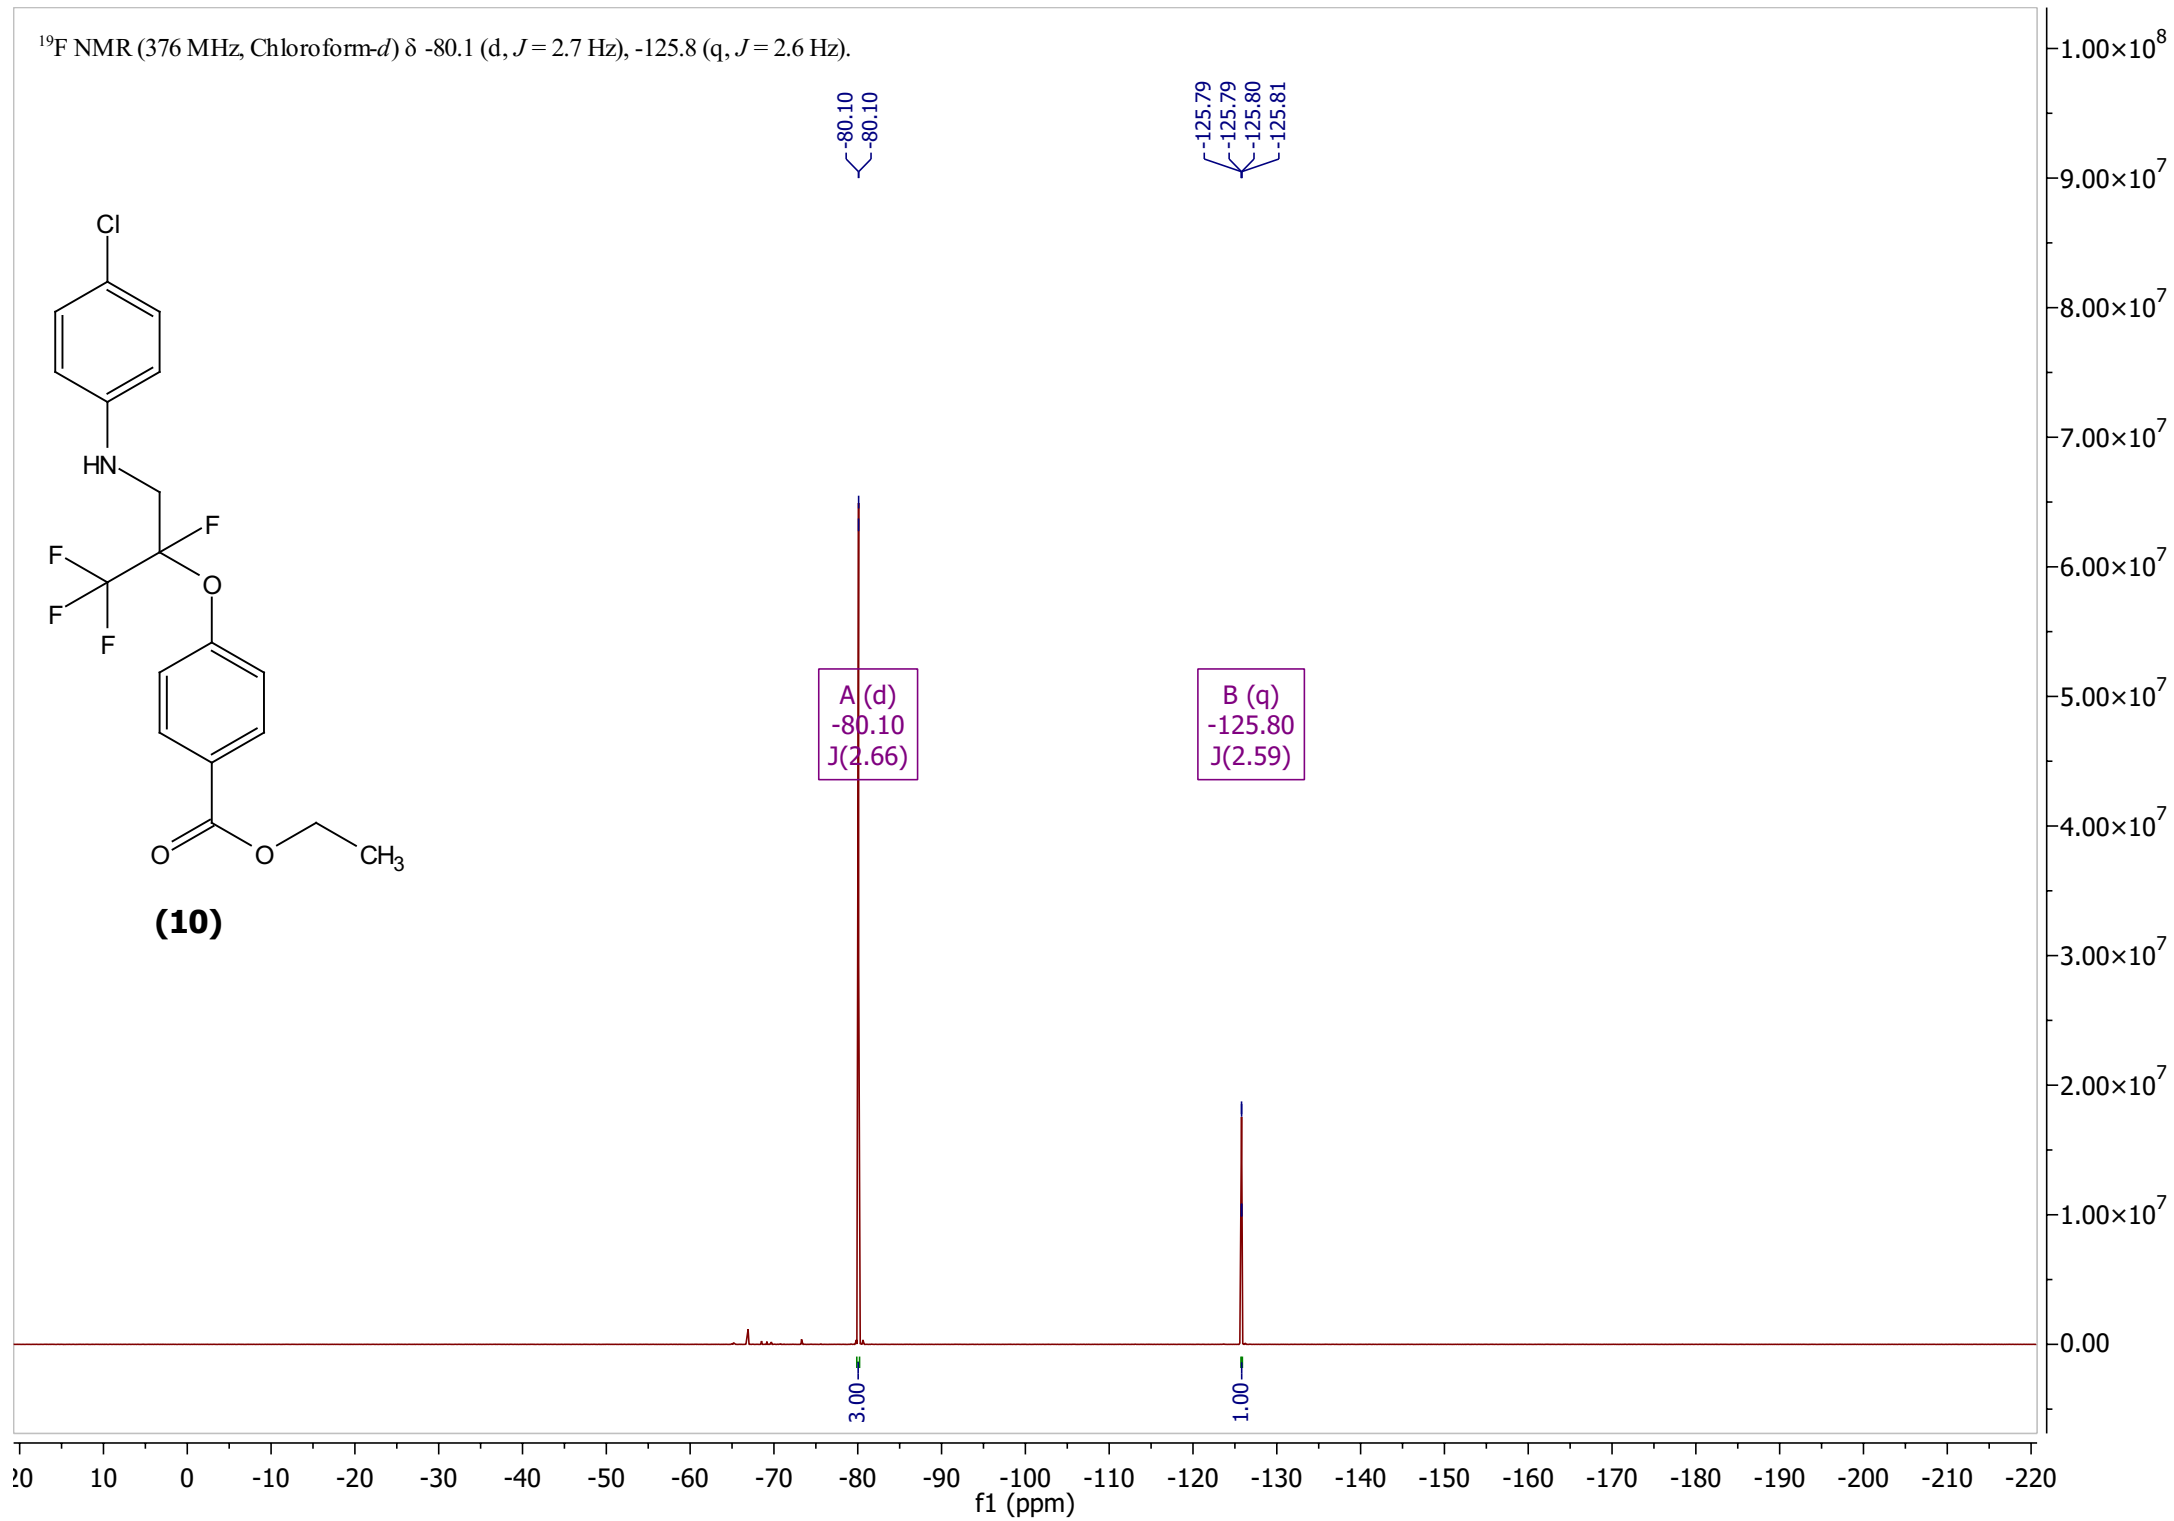

$^{13}\text{C}$  NMR (101 MHz, Chloroform- $d$ )  $\delta$  165.7, 155.4, 145.2, 131.4, 129.2, 128.3, 123.5, 121.8 (d,  $J = 2.7$  Hz), 120.5 (qd,  $J = 287.9, 37.8$  Hz), 114.4, 108.7 (dq,  $J = 241.2, 33.1$  Hz), 61.3, 45.2 (d,  $J = 28.1$  Hz), 14.4.



**(10)**

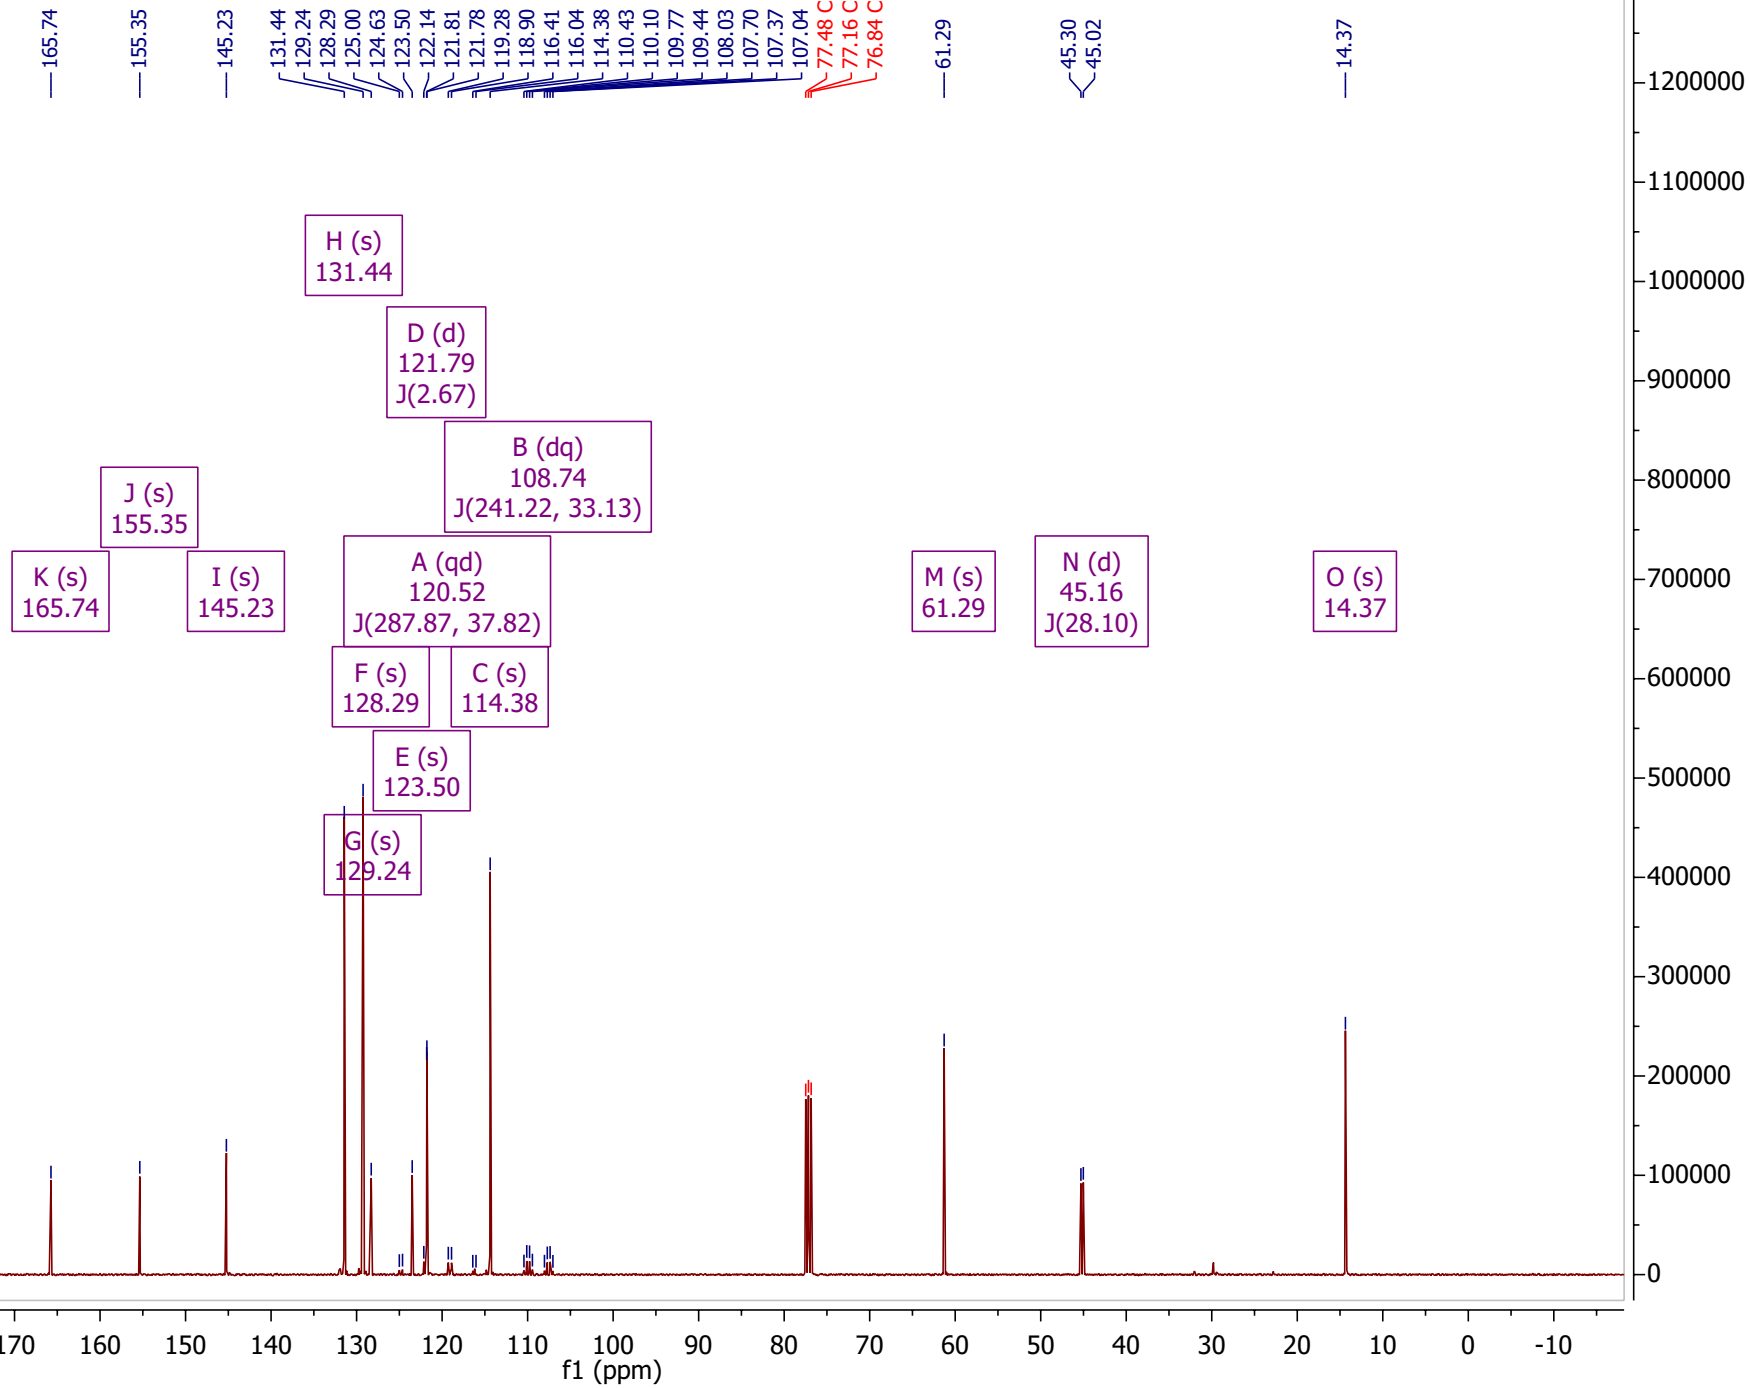

$^1\text{H}$  NMR (400 MHz, Chloroform-*d*)  $\delta$  8.03 (d,  $J = 8.7$  Hz, 2H), 7.23 (d,  $J = 8.5$  Hz, 2H), 6.98 (d,  $J = 8.2$  Hz, 2H), 6.51 (d,  $J = 8.4$  Hz, 2H), 4.38 (q,  $J = 7.1$  Hz, 2H), 3.86 – 3.70 (m, 2H), 3.68 (bs, 1H), 2.24 (s, 3H), 1.40 (t,  $J = 7.1$  Hz, 3H).

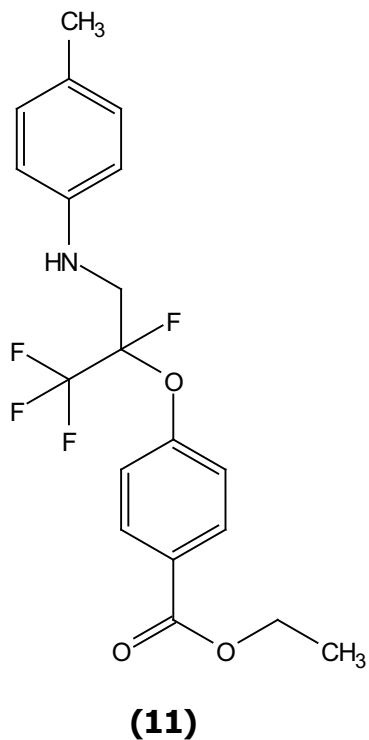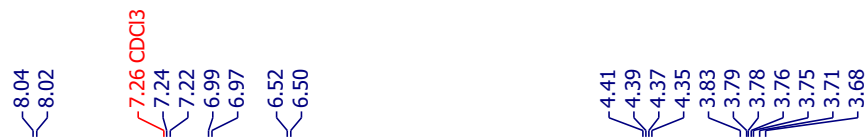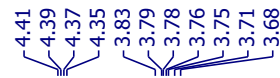

2.24

1.42  
1.40  
1.38

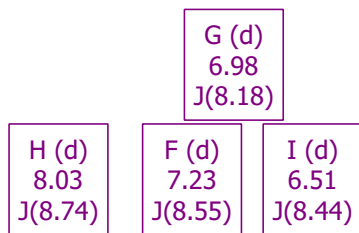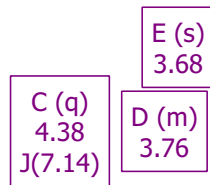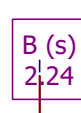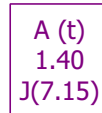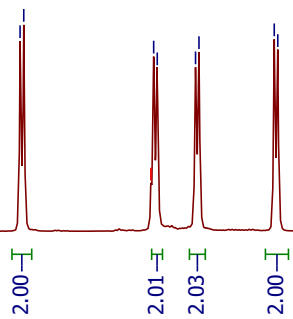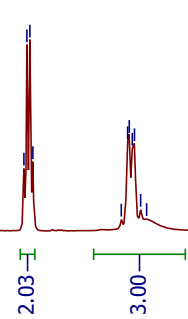

3.00

3.05

10.5 10.0 9.5 9.0 8.5 8.0 7.5 7.0 6.5 6.0 5.5 5.0 4.5 4.0 3.5 3.0 2.5 2.0 1.5 1.0 0.5 0.0 -0.5 -1.0  
f1 (ppm)

22000000  
21000000  
20000000  
19000000  
18000000  
17000000  
16000000  
15000000  
14000000  
13000000  
12000000  
11000000  
10000000  
9000000  
8000000  
7000000  
6000000  
5000000  
4000000  
3000000  
2000000  
1000000  
0  
-1000000

$^{19}\text{F}$  NMR (376 MHz, Chloroform-*d*)  $\delta$  -80.2 (d,  $J = 3.0$  Hz), -125.6 (q,  $J = 3.0$  Hz).

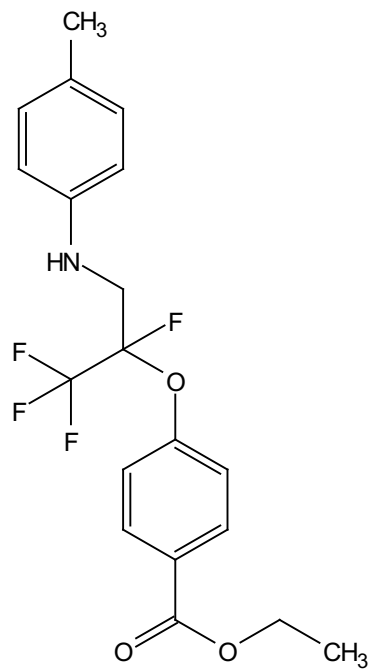

**(11)**

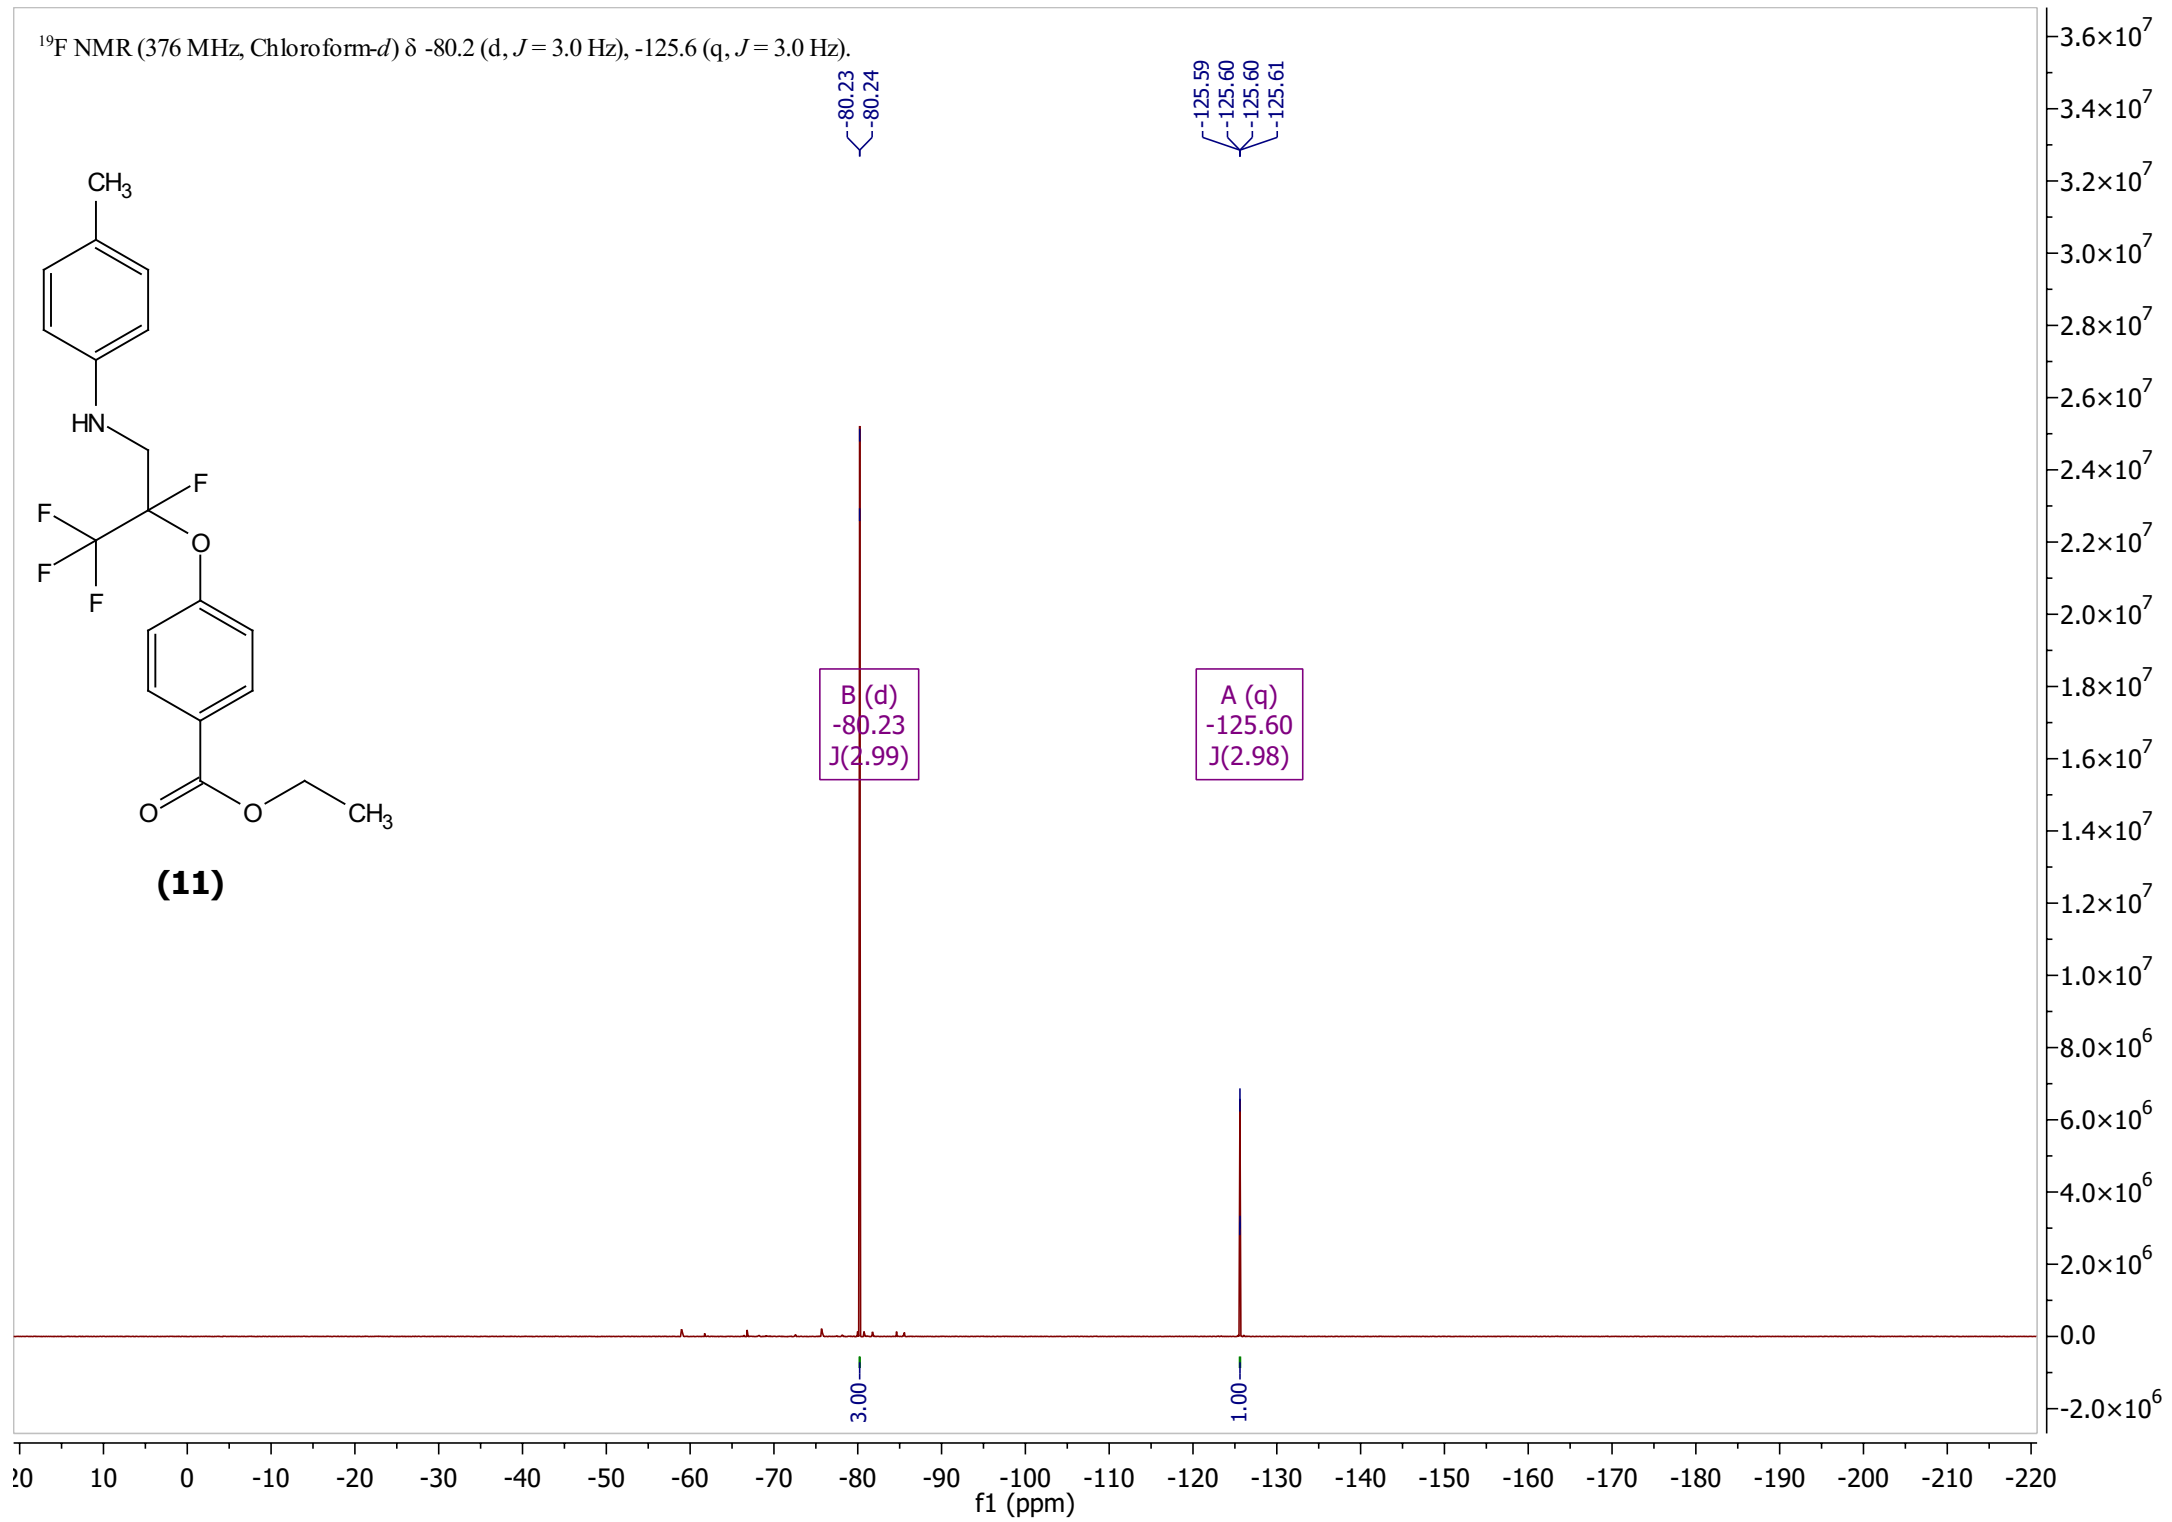

<sup>13</sup>C NMR (101 MHz, Chloroform-*d*) δ 165.8, 155.5, 144.3, 131.4, 129.9, 128.2, 128.2, 121.9 (d, *J* = 2.5 Hz), 120.6 (qd, *J* = 288.2, 37.4 Hz), 113.5, 108.9 (dq, *J* = 240.9, 33.2 Hz), 61.3, 45.4 (d, *J* = 28.4 Hz), 20.5, 14.4.

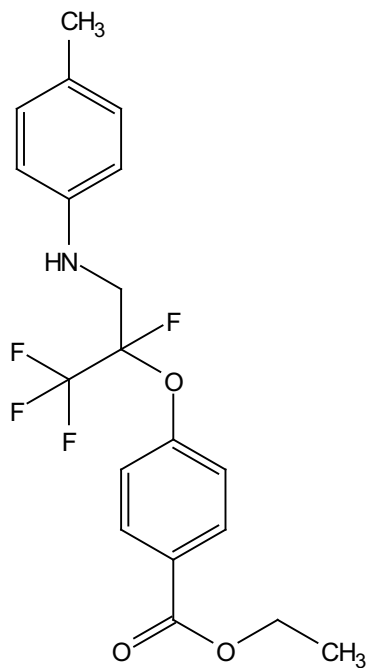

**(11)**

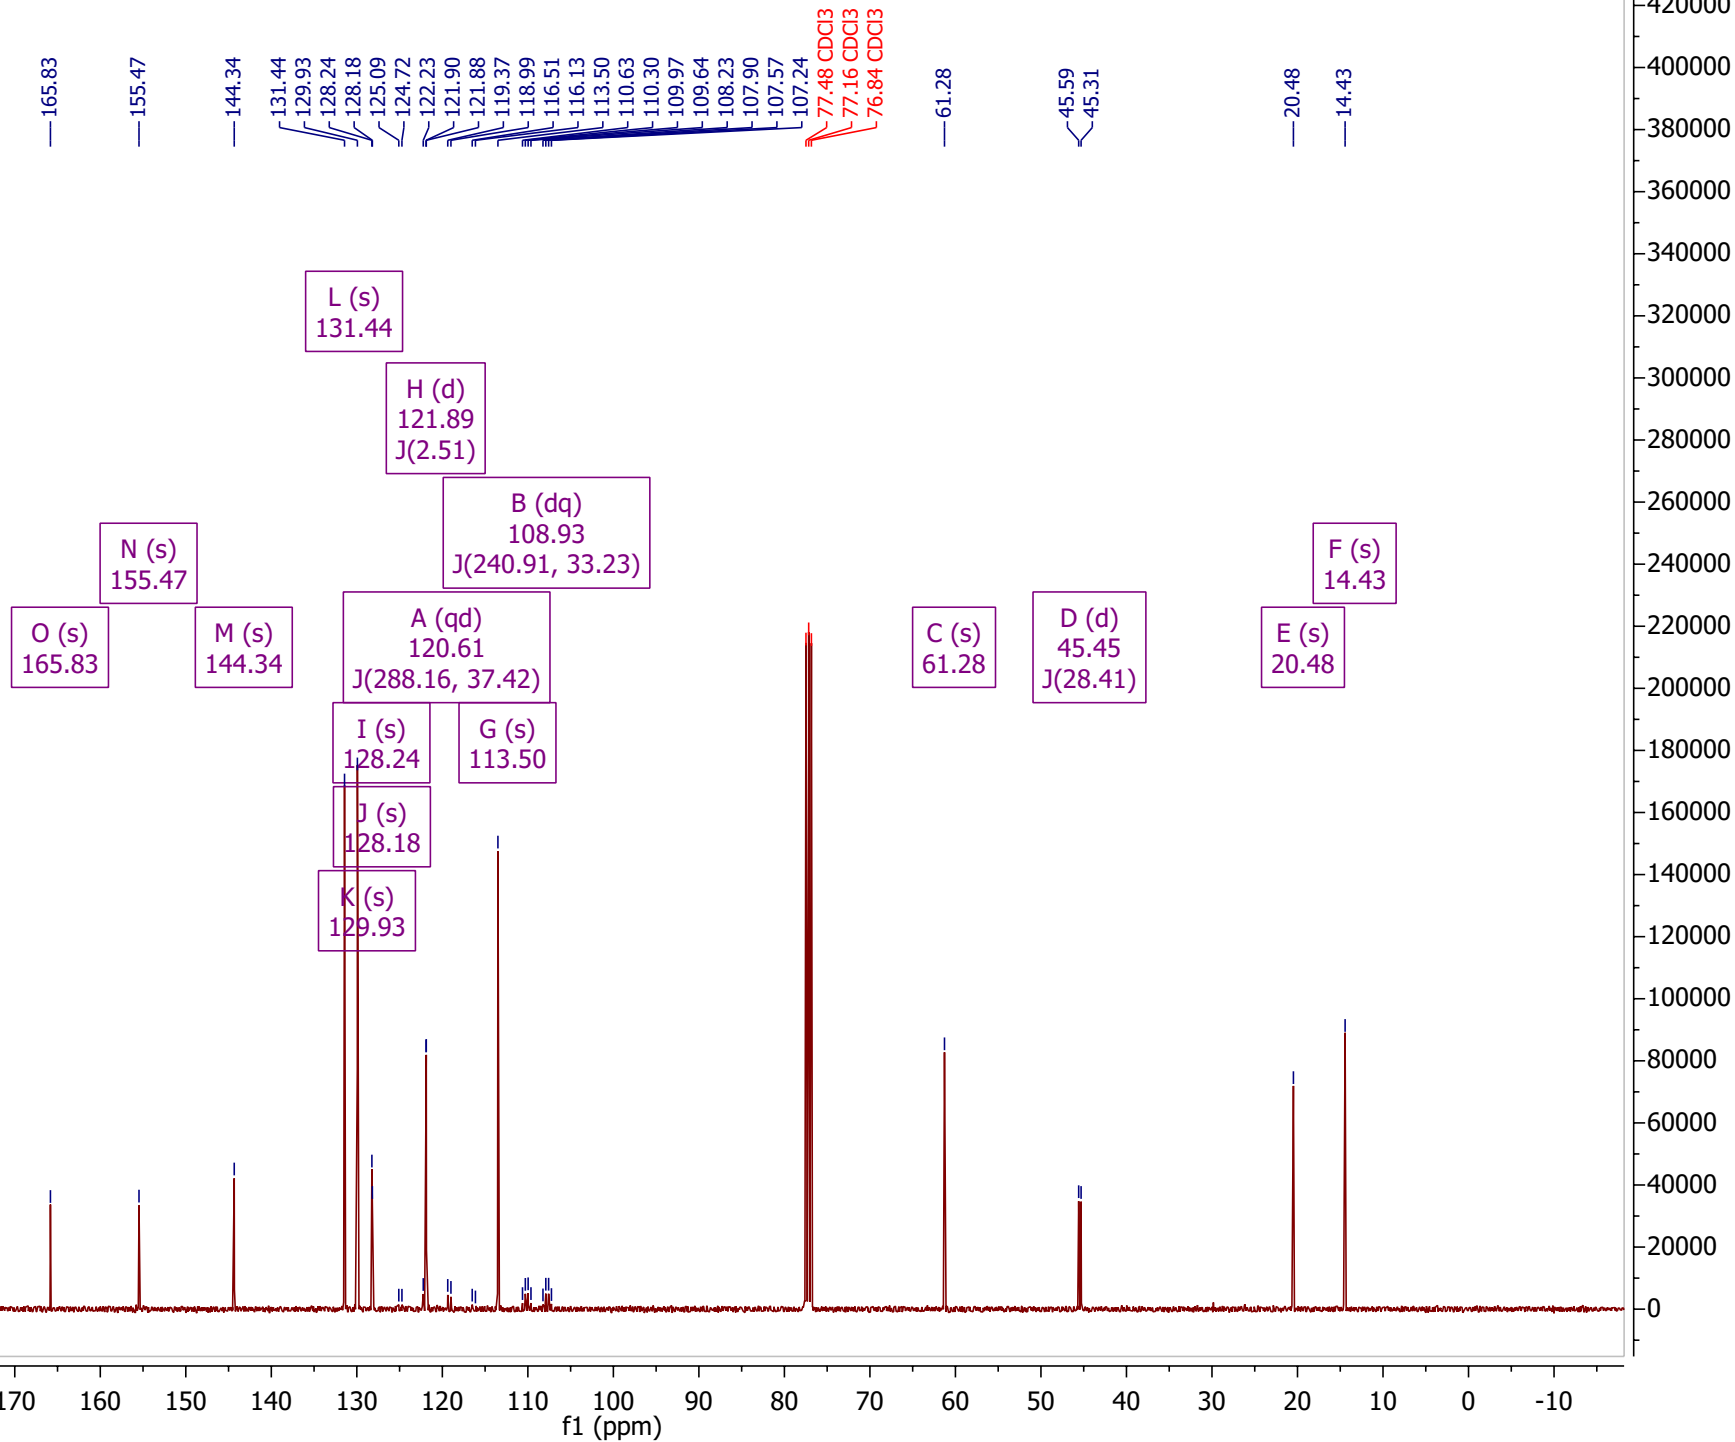



$^1\text{H}$  NMR (400 MHz, Chloroform- $d$ )  $\delta$  7.99 (d,  $J$  = 8.5 Hz, 2H), 7.27 (dd,  $J$  = 28.3, 7.9 Hz, 2H), 7.23 – 7.15 (m, 3H), 6.79 (dd,  $J$  = 7.9, 1.5 Hz, 1H), 4.35 (q,  $J$  = 7.1 Hz, 2H), 4.13 (bs, 1H), 3.90 – 3.76 (m, 2H), 2.52 (s, 3H), 1.36 (t,  $J$  = 7.2 Hz, 3H).

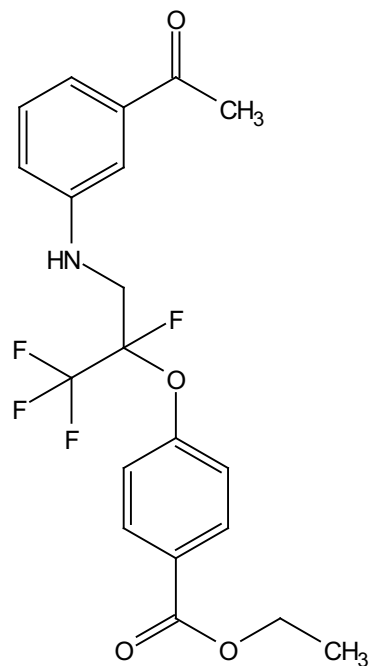

**(13)**

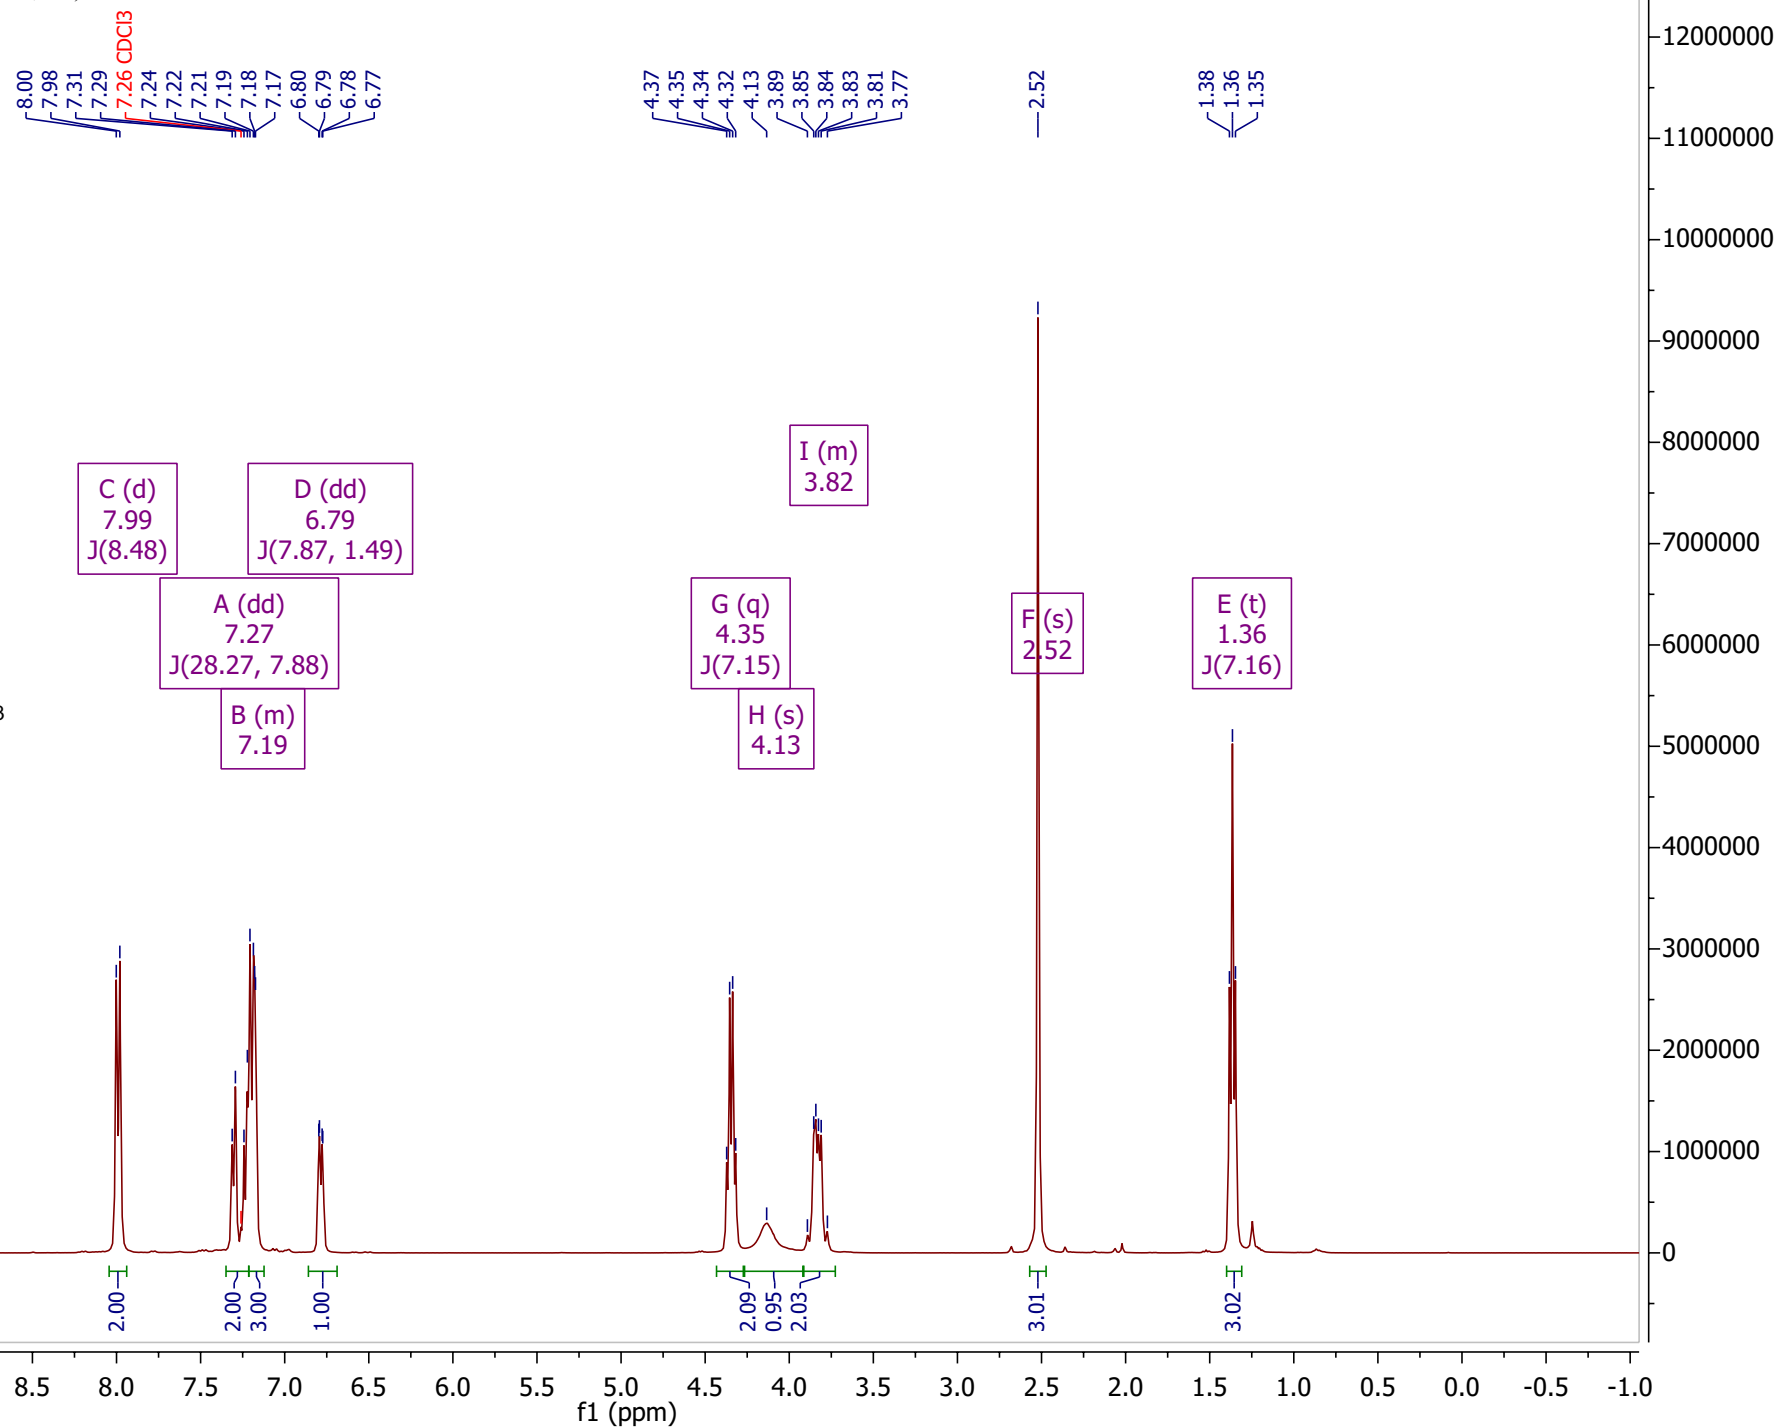

$^{19}\text{F}$  NMR (376 MHz, Chloroform-*d*)  $\delta$  -80.1 (d,  $J = 2.7$  Hz), -125.6 (q,  $J = 2.8$  Hz).

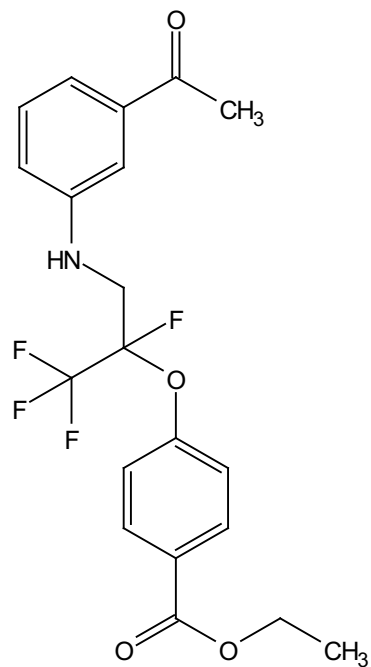

**(13)**

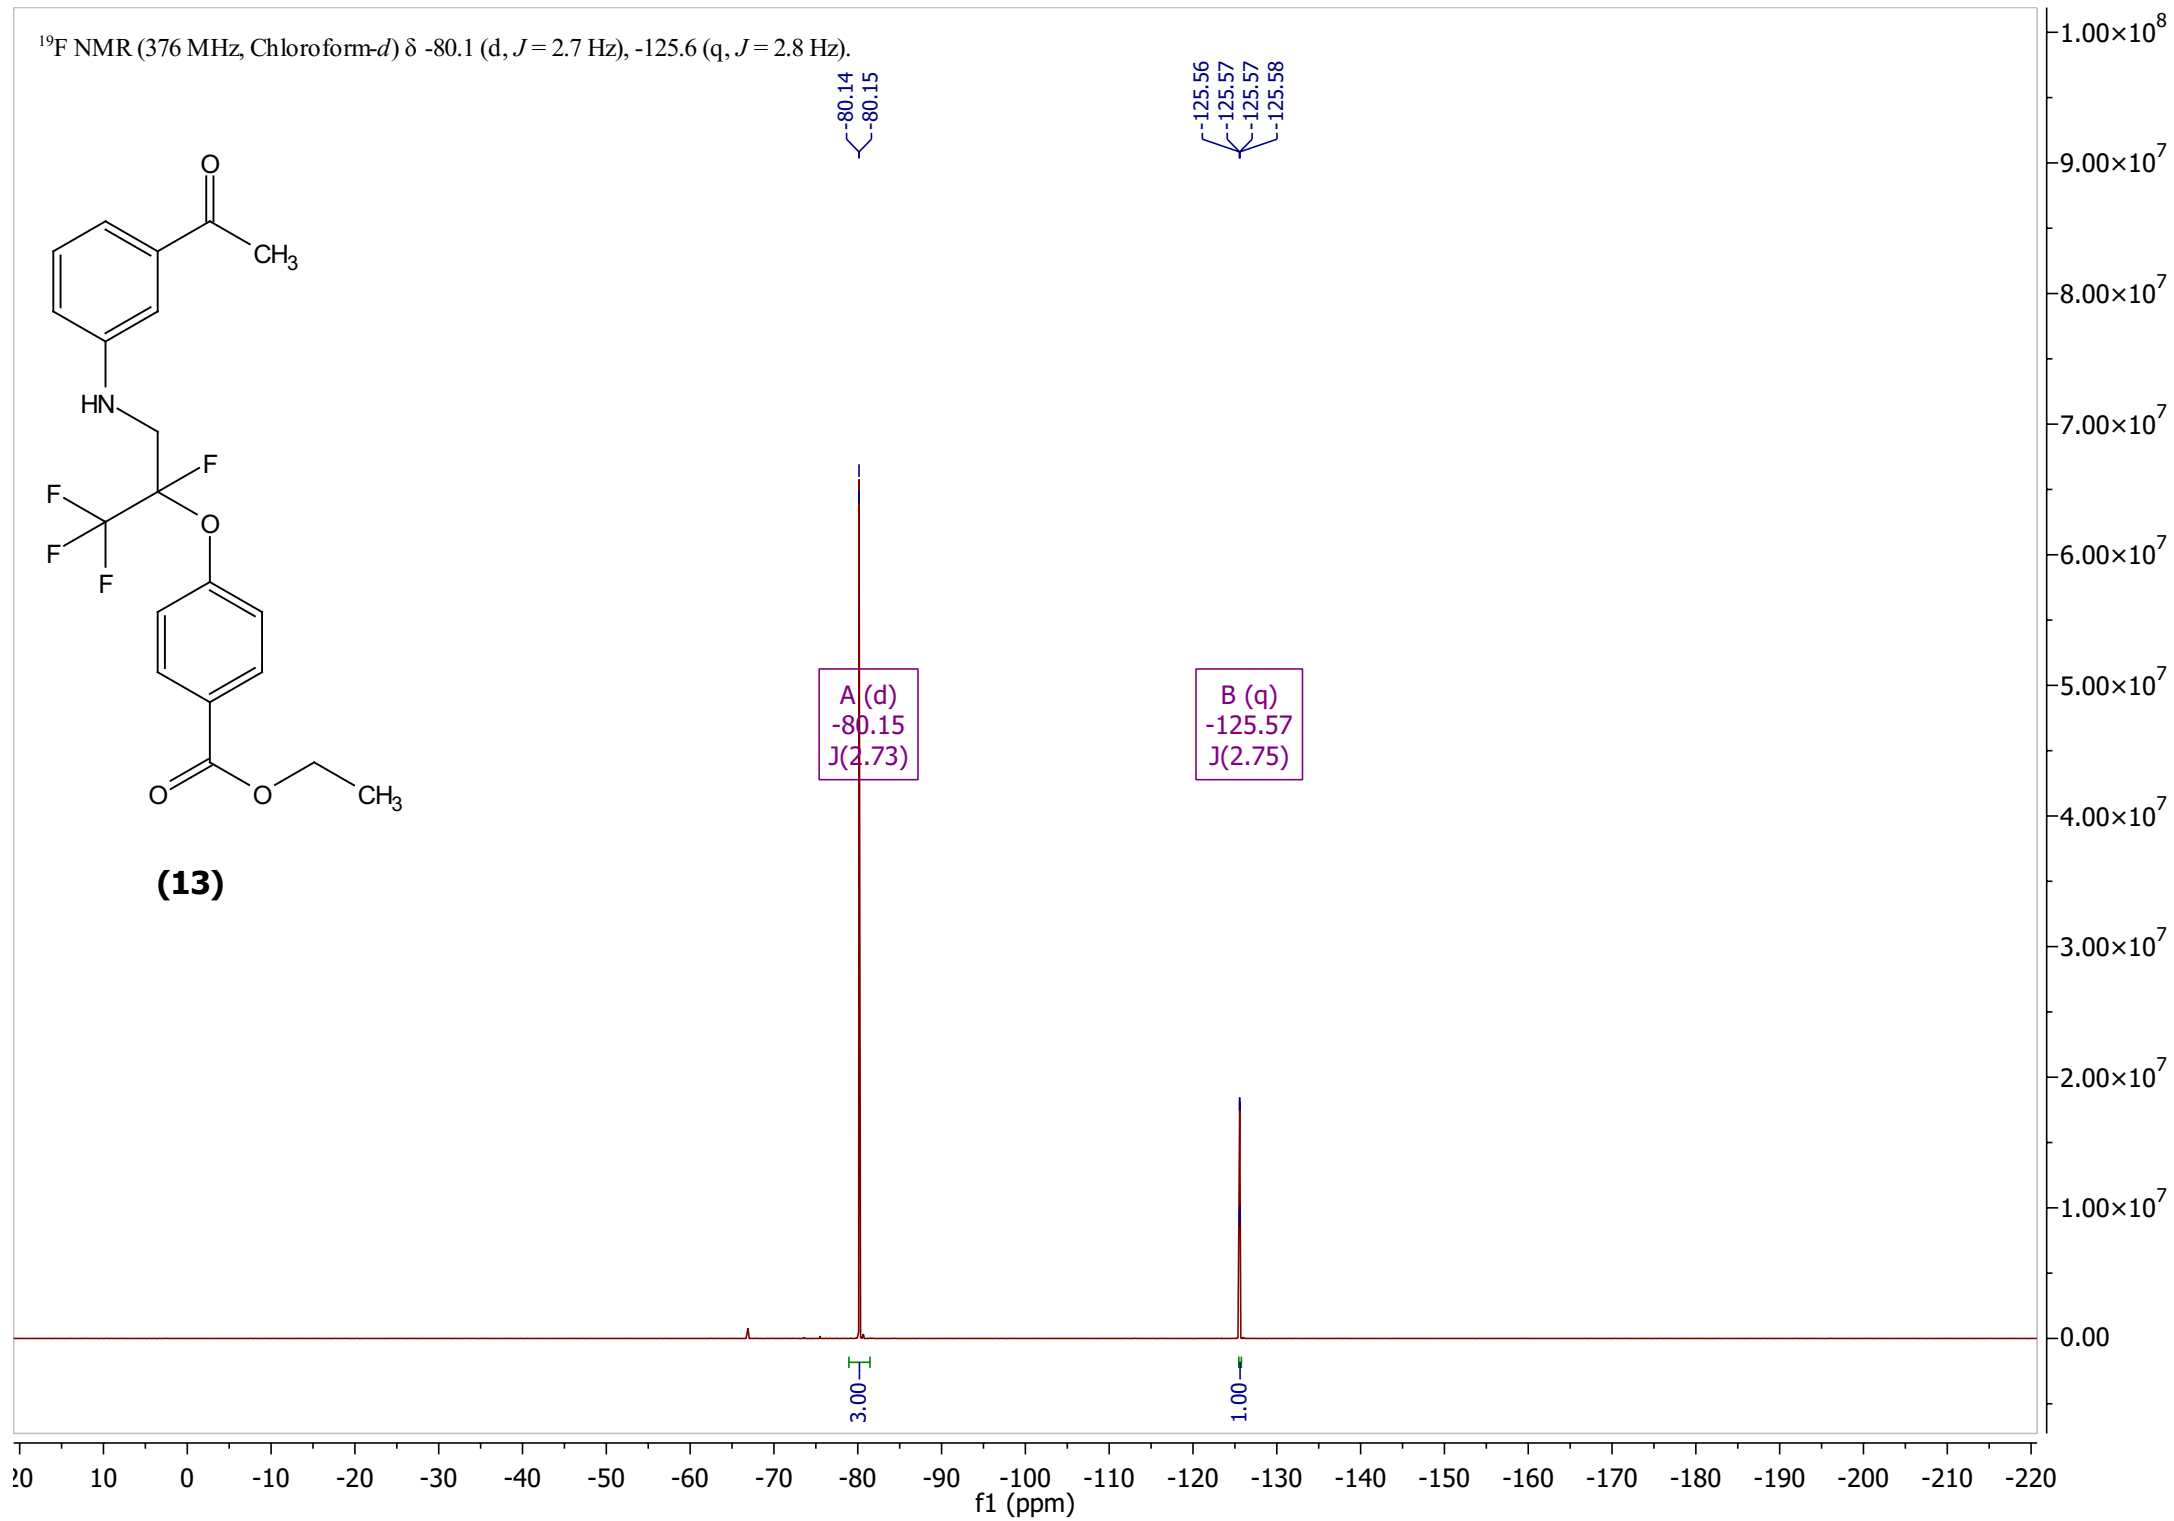

<sup>13</sup>C NMR (101 MHz, Chloroform-*d*) δ 198.3, 165.7, 155.3, 146.9, 138.2, 131.4, 129.5, 128.2, 121.7 (d, *J* = 2.5 Hz), 120.5 (qd, *J* = 288.3, 37.8 Hz), 119.2, 117.8, 112.0, 108.7 (dq, *J* = 241.4, 33.2 Hz), 61.2, 44.8 (d, *J* = 28.5 Hz), 26.7, 14.3.

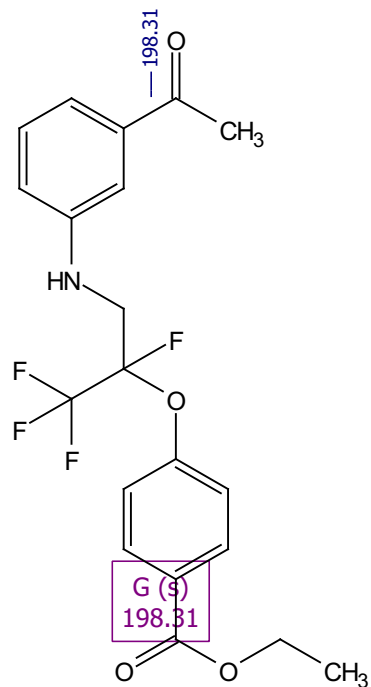

**(13)**

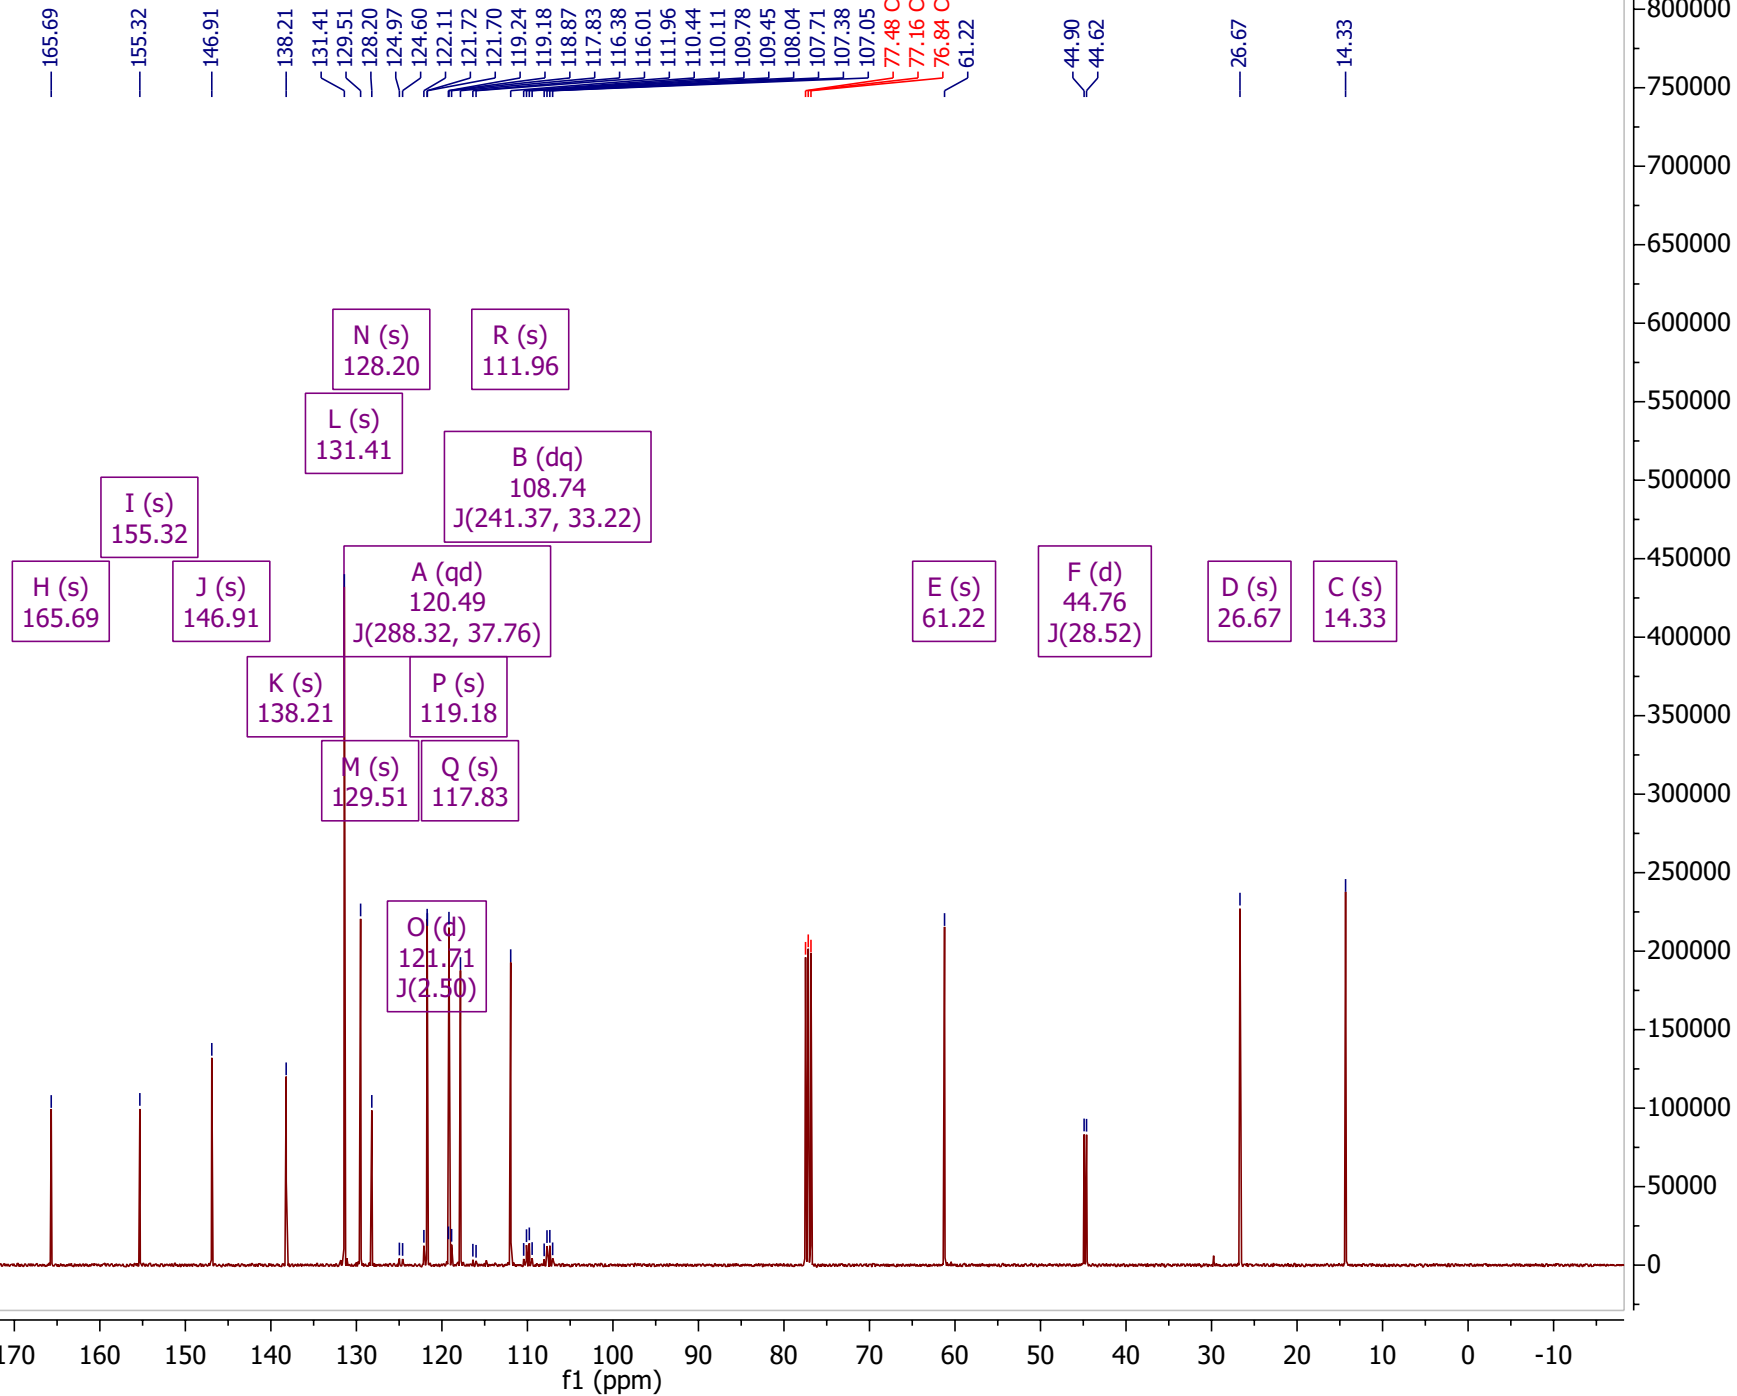

$^1\text{H}$  NMR (400 MHz, Chloroform-*d*)  $\delta$  8.03 (d,  $J = 8.4$  Hz, 2H), 7.21 (d,  $J = 8.3$  Hz, 2H), 7.00 (t,  $J = 8.0$  Hz, 1H), 6.89 – 6.82 (m, 1H), 6.70 (t,  $J = 2.2$  Hz, 1H), 6.51 (dd,  $J = 8.1, 2.6$  Hz, 1H), 4.37 (q,  $J = 7.1$  Hz, 2H), 3.96 (s, 1H), 3.85 – 3.69 (m, 2H), 1.39 (t,  $J = 7.1$  Hz, 3H).

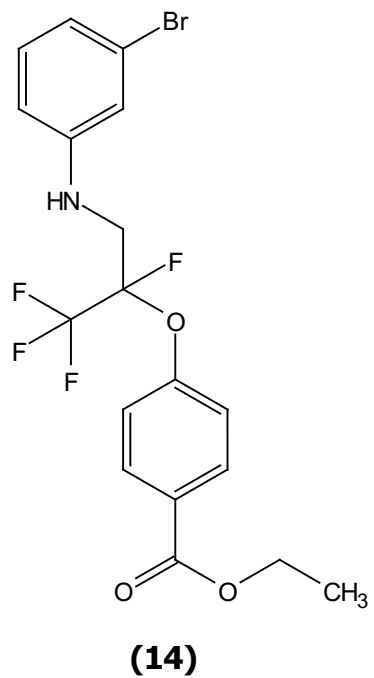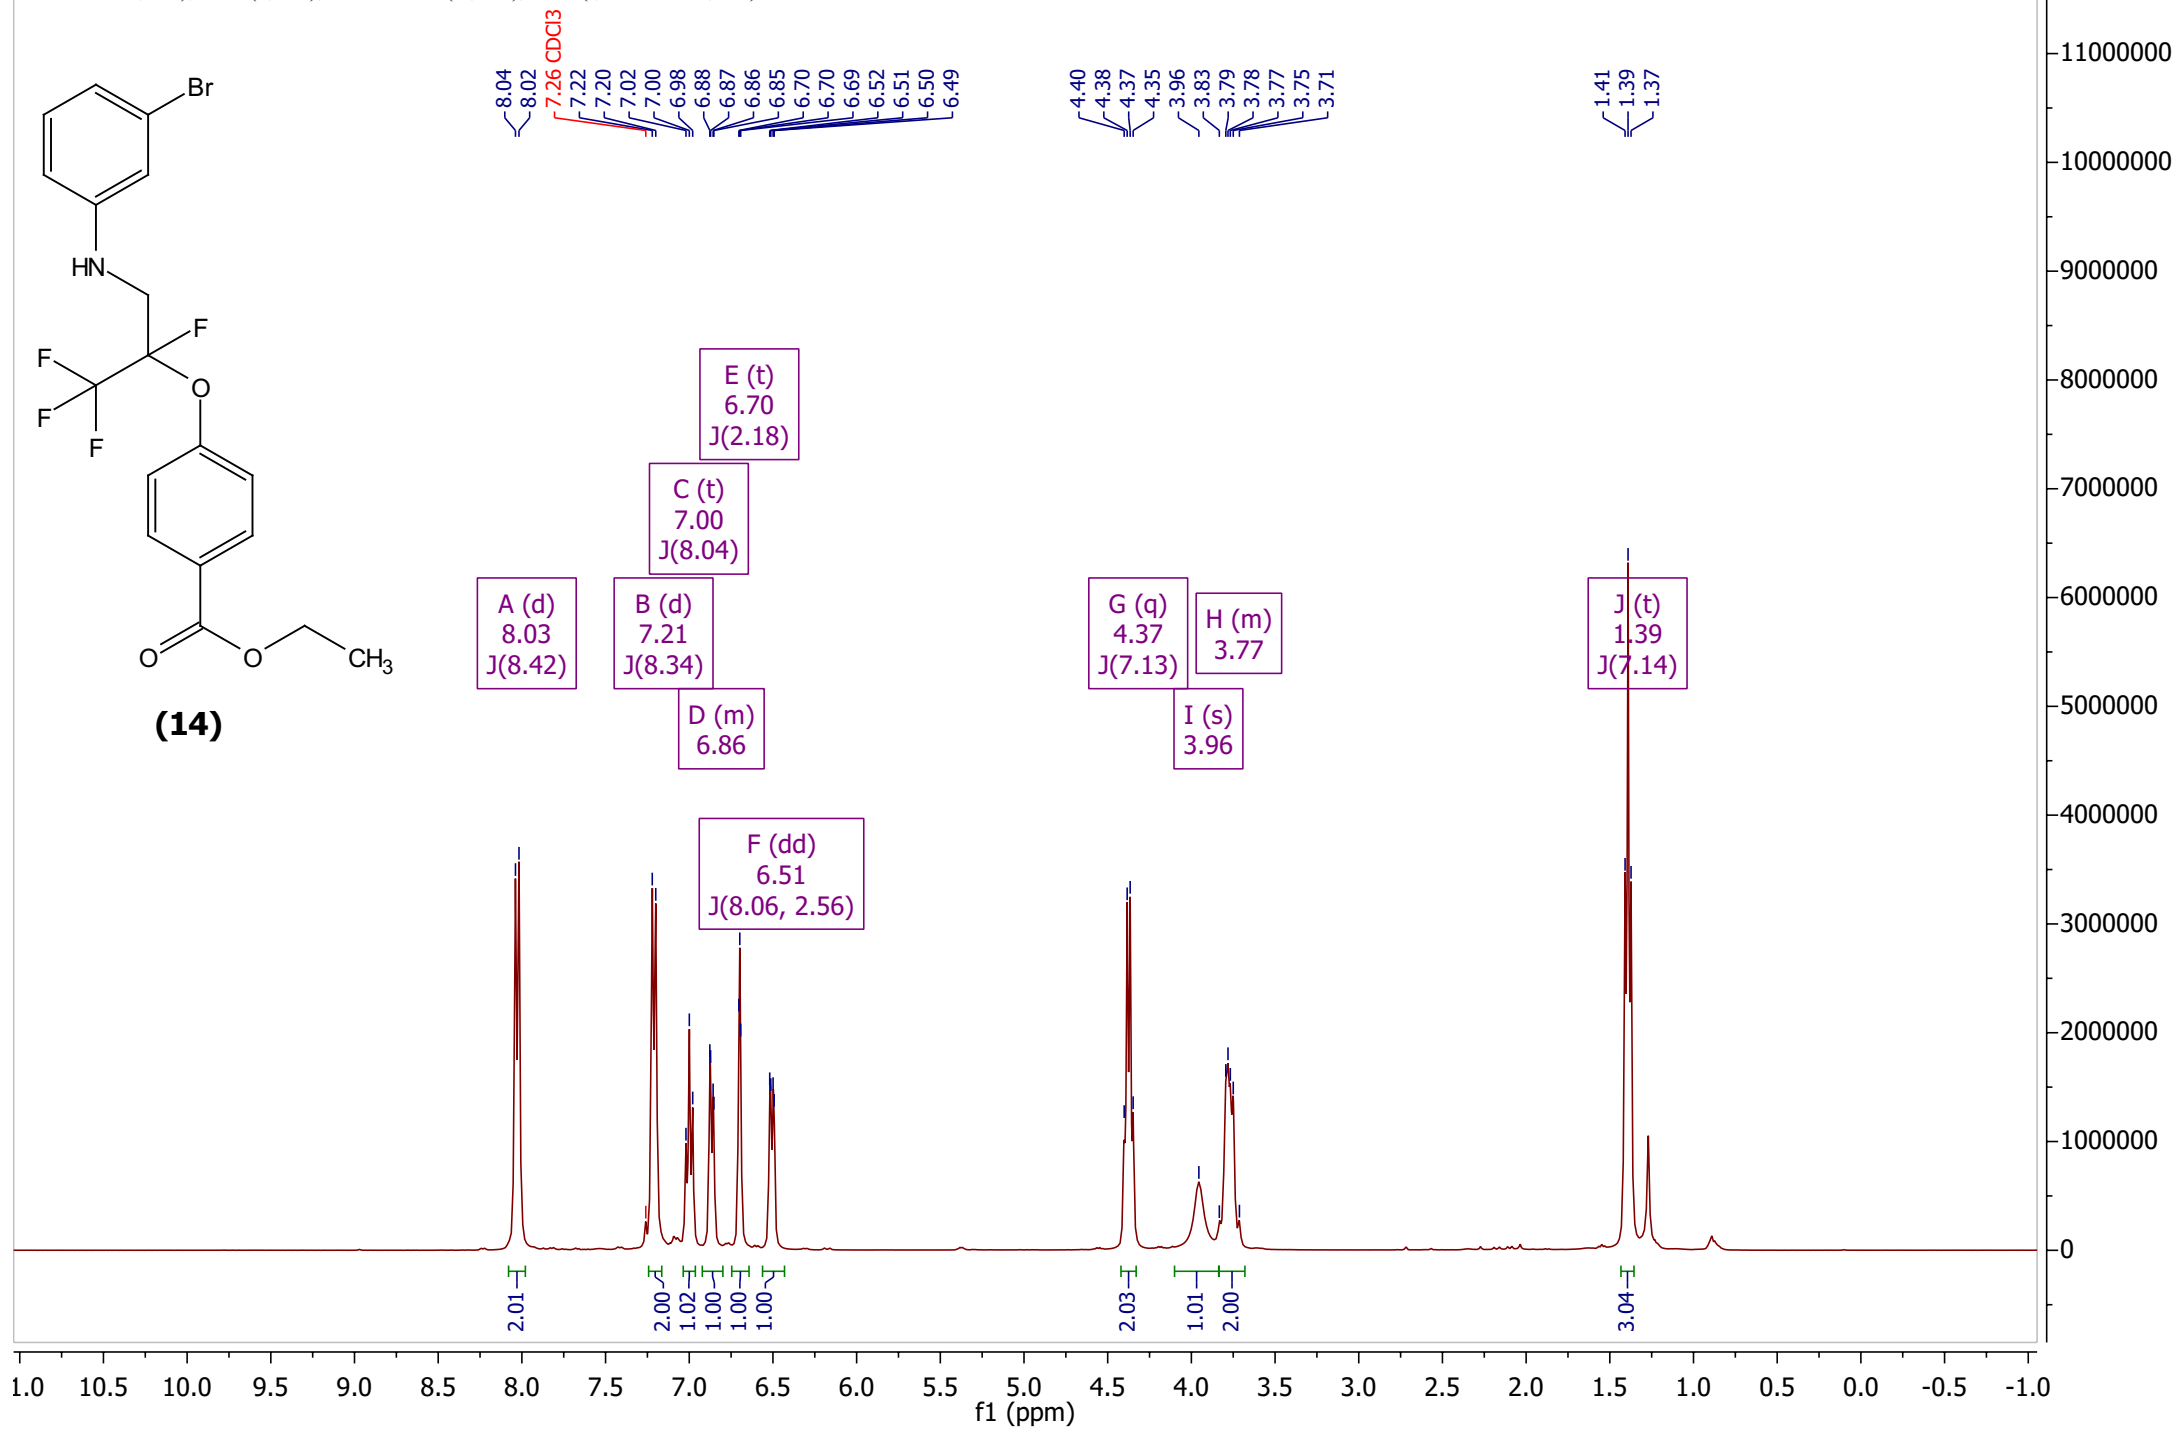

$^{19}\text{F}$  NMR (376 MHz, Chloroform-*d*)  $\delta$  -80.1 (d,  $J = 2.7$  Hz), -125.5 (q,  $J = 2.8$  Hz).

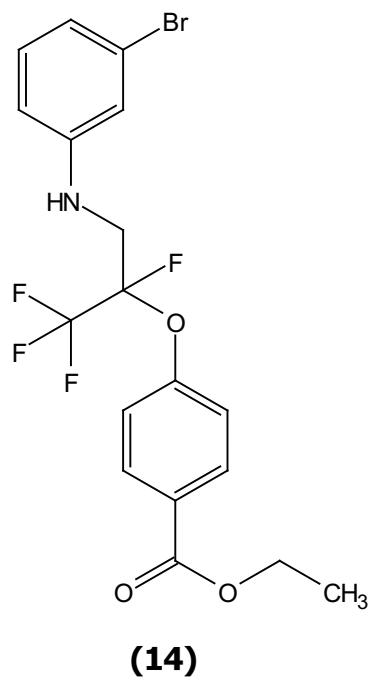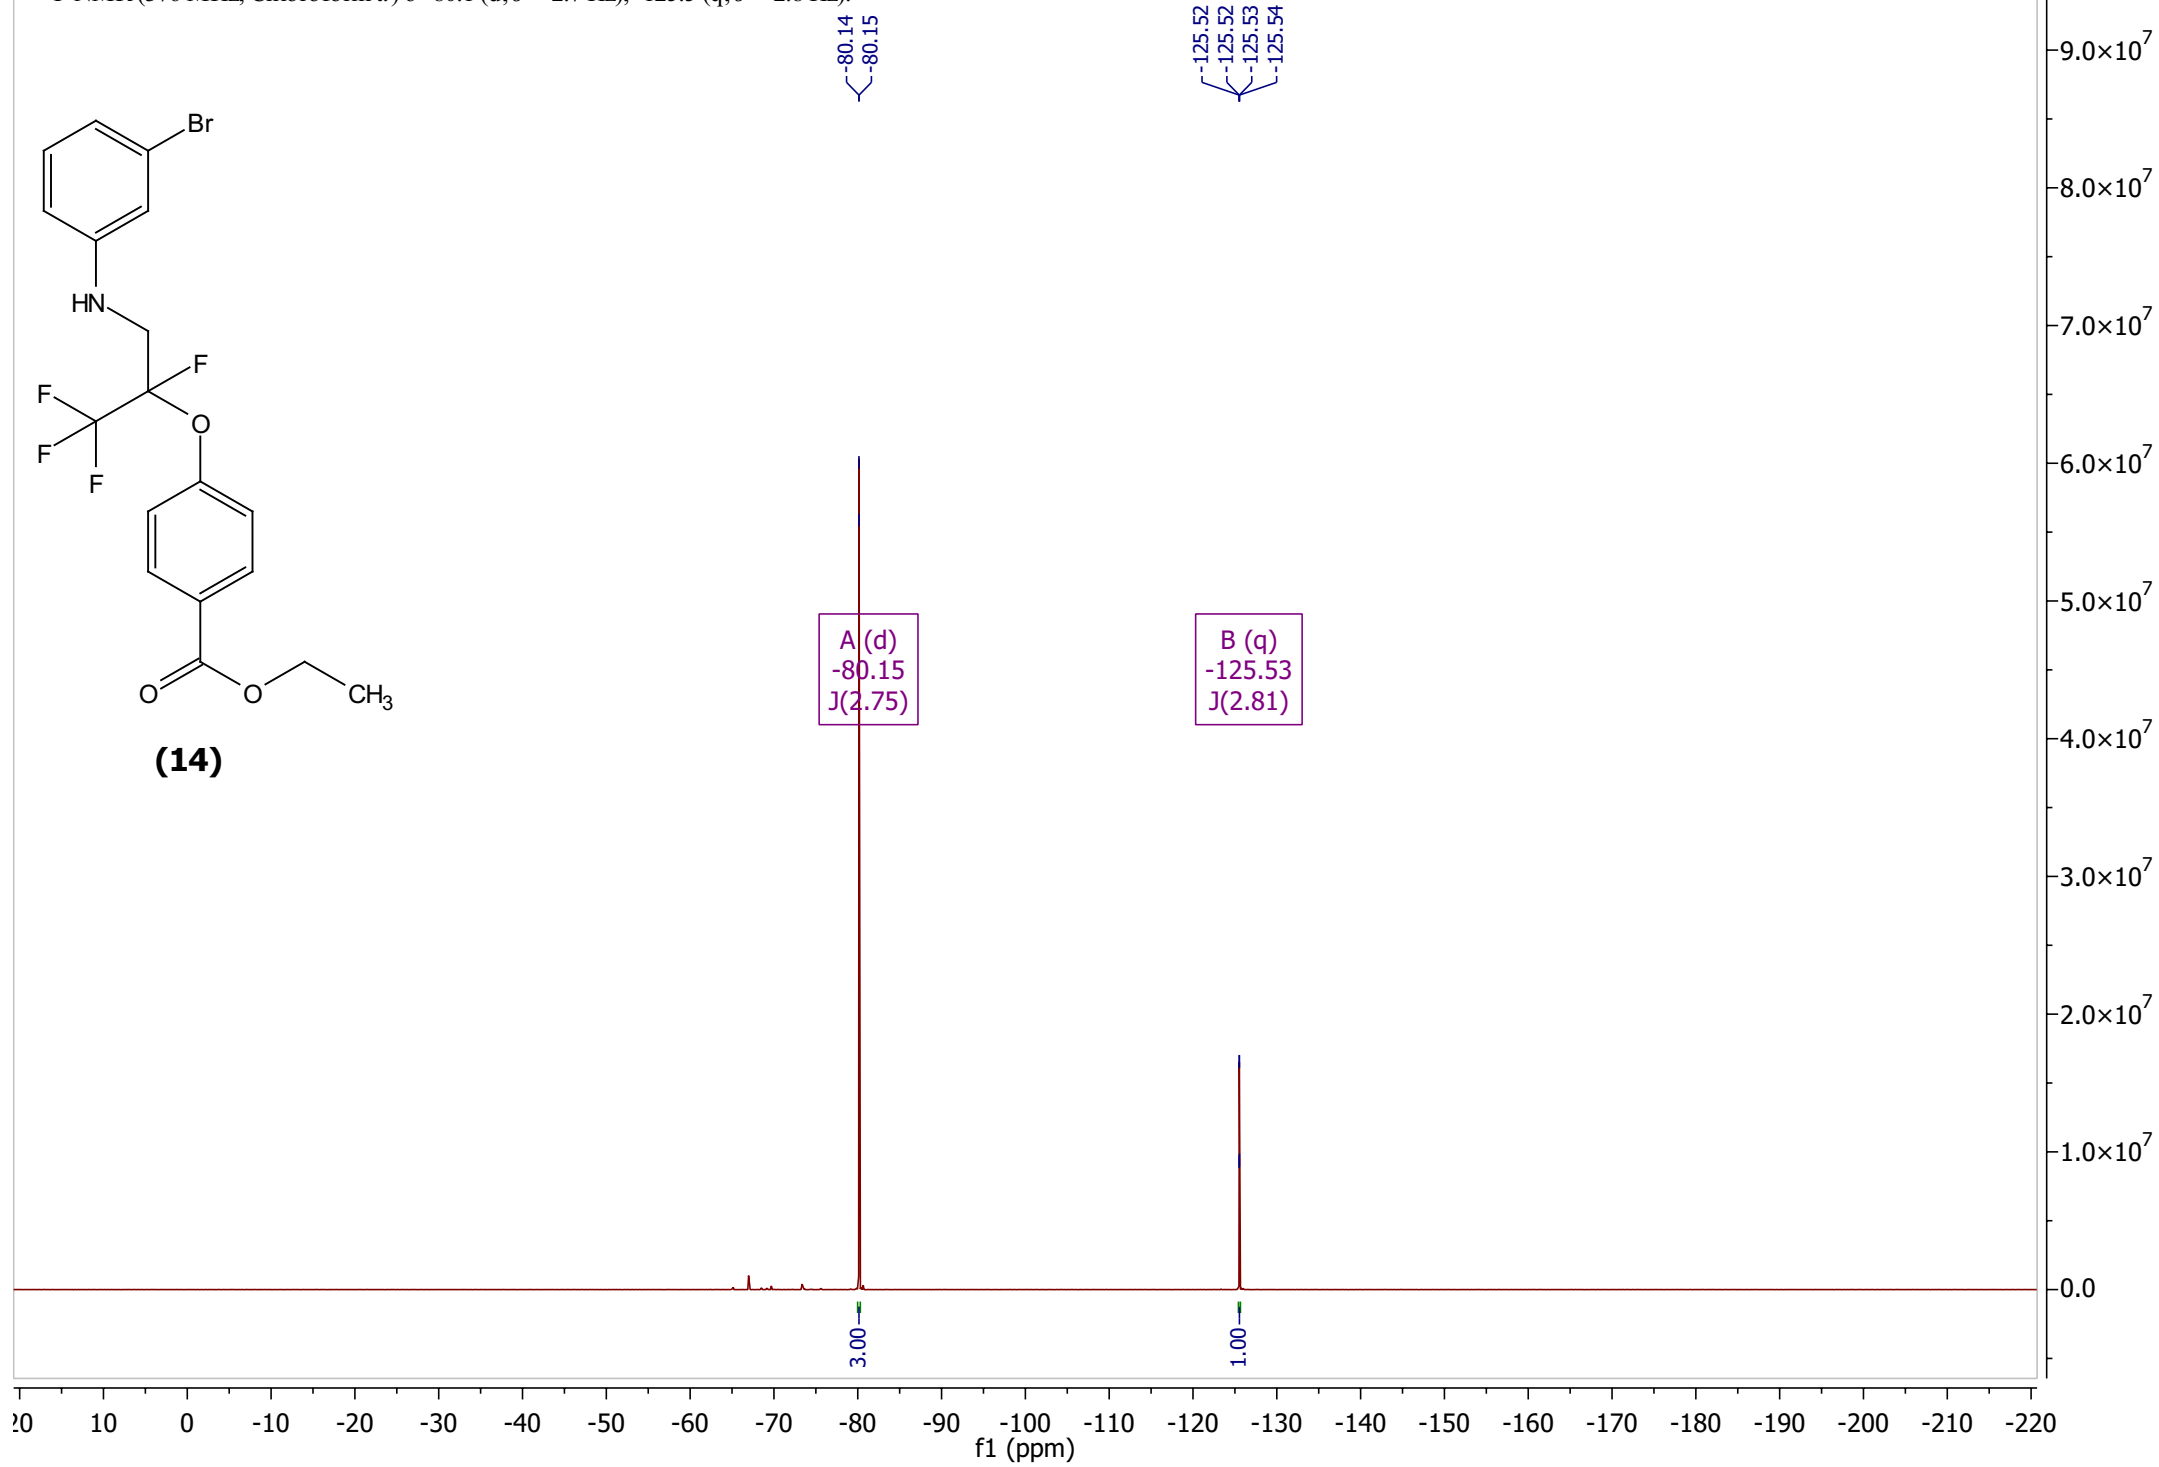

$^{13}\text{C}$  NMR (101 MHz, Chloroform-*d*)  $\delta$  165.7, 155.3, 147.9, 131.5, 130.6, 128.3, 123.3, 121.7 (d,  $J = 2.5$  Hz), 121.7, 120.5 (qd,  $J = 288.3, 38.1$  Hz), 116.0, 111.9, 108.7 (dq,  $J = 241.3, 33.1$  Hz), 61.3, 44.7 (d,  $J = 28.5$  Hz), 14.4.

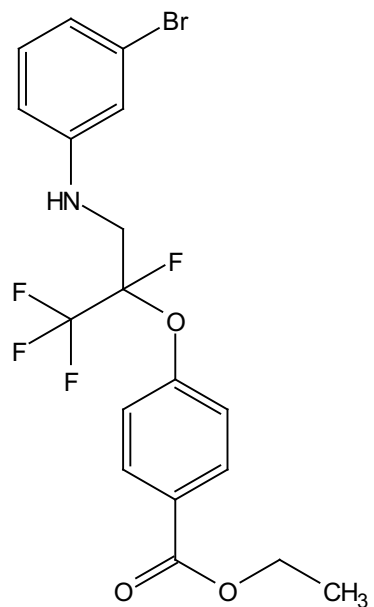

**(14)**

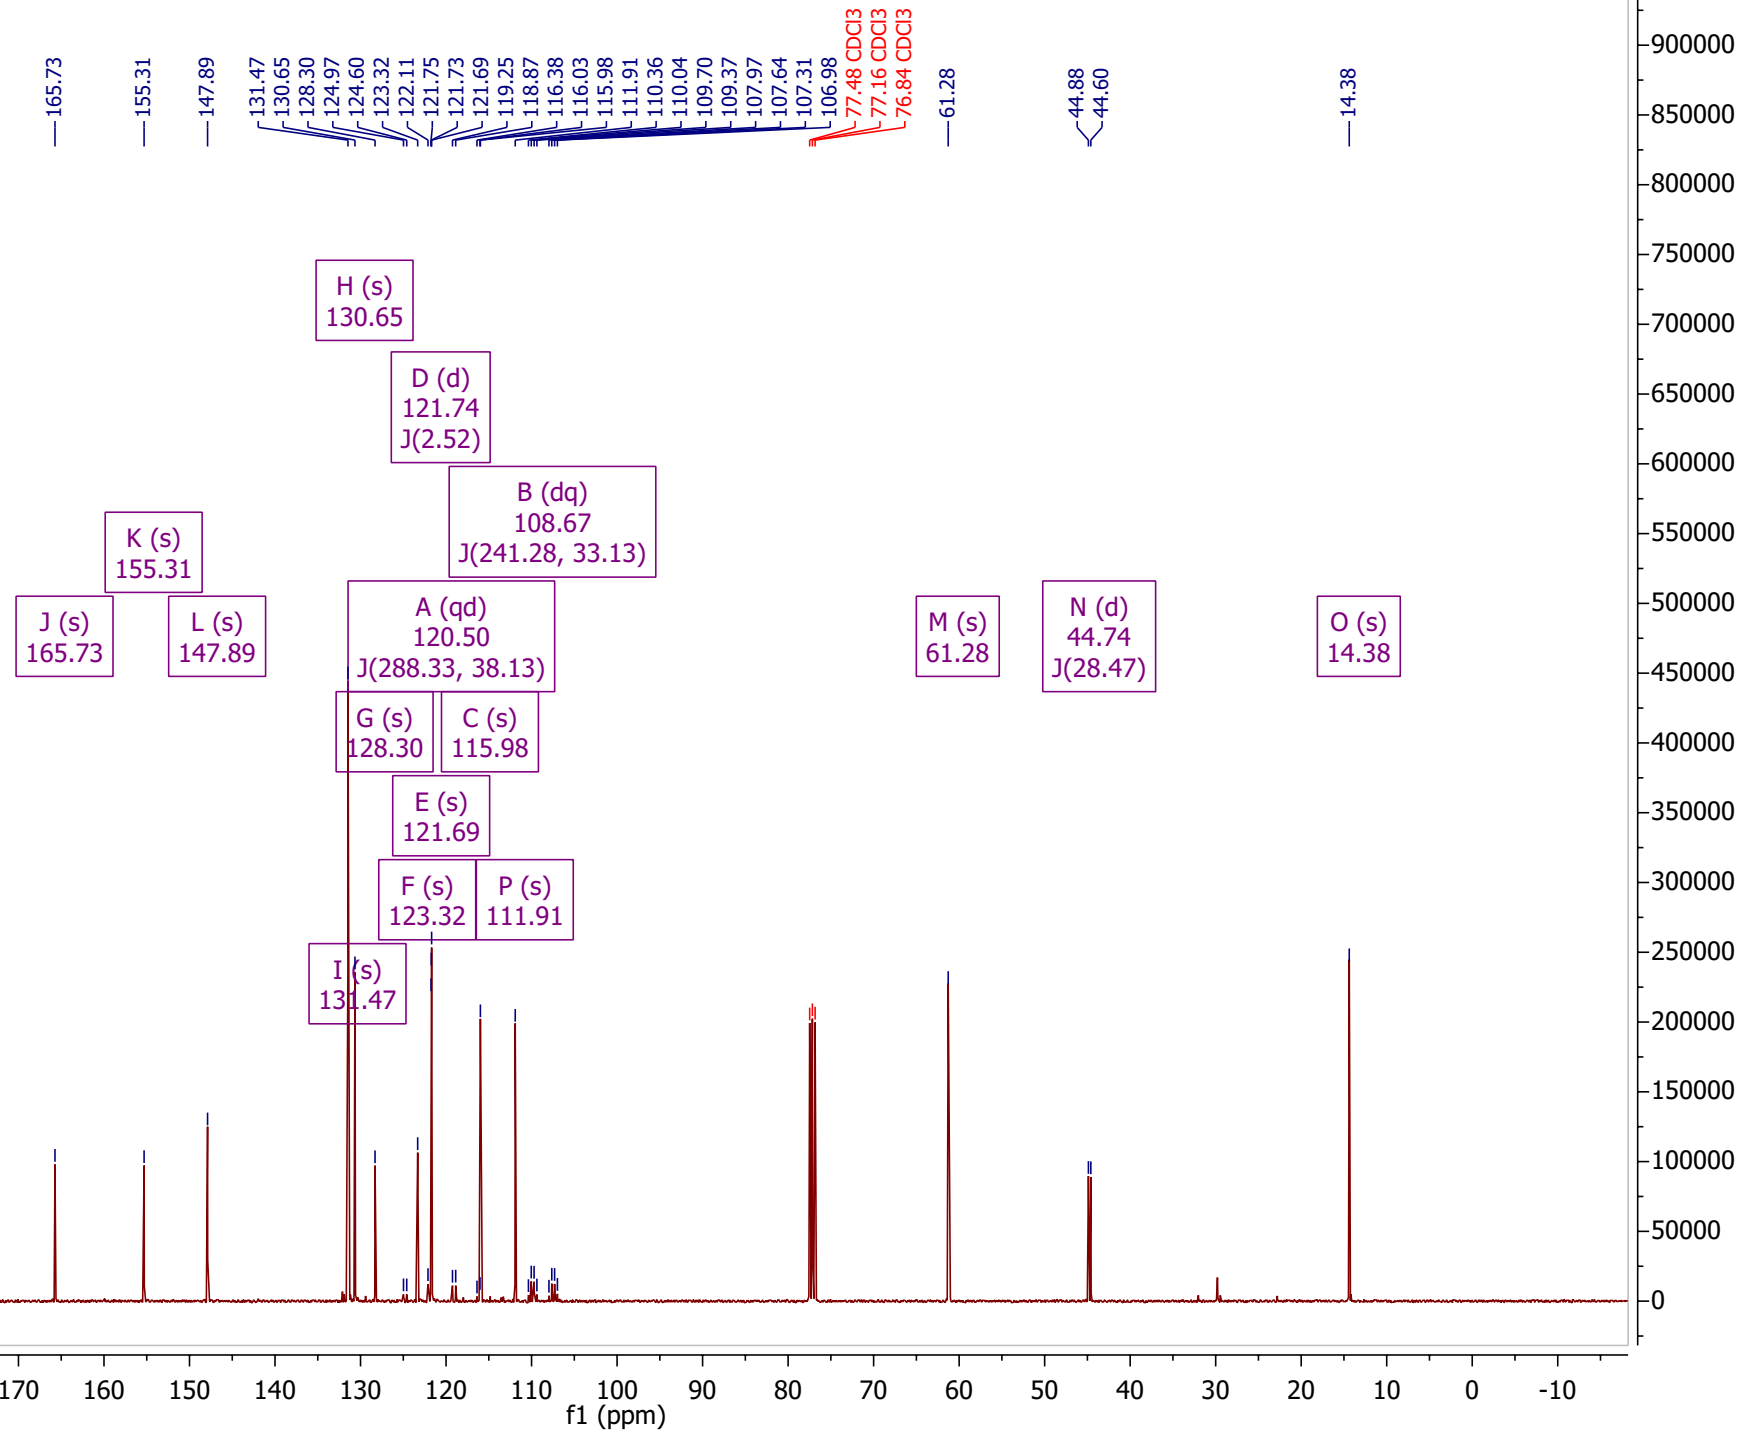

$^1\text{H}$  NMR (400 MHz, Chloroform-*d*)  $\delta$  8.03 (d,  $J = 8.7$  Hz, 2H), 7.23 (d,  $J = 8.4$  Hz, 2H), 7.08 (t,  $J = 8.1$  Hz, 1H), 6.34 (dd,  $J = 8.2, 2.4$  Hz, 1H), 6.22 (dd,  $J = 8.1, 2.3$  Hz, 1H), 6.15 (t,  $J = 2.4$  Hz, 1H), 4.38 (q,  $J = 7.1$  Hz, 2H), 3.88 – 3.69 (m, 6H), 1.40 (t,  $J = 7.2$  Hz, 3H).

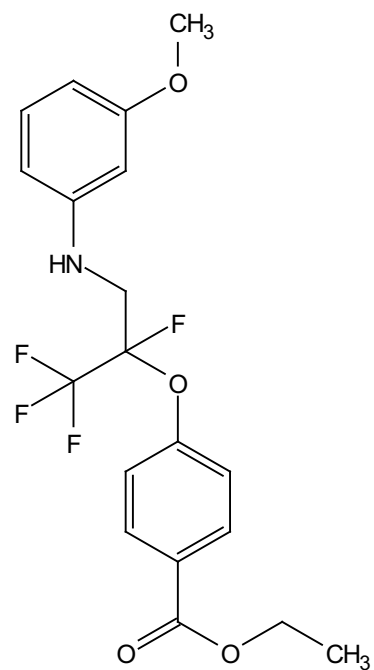

**(15)**

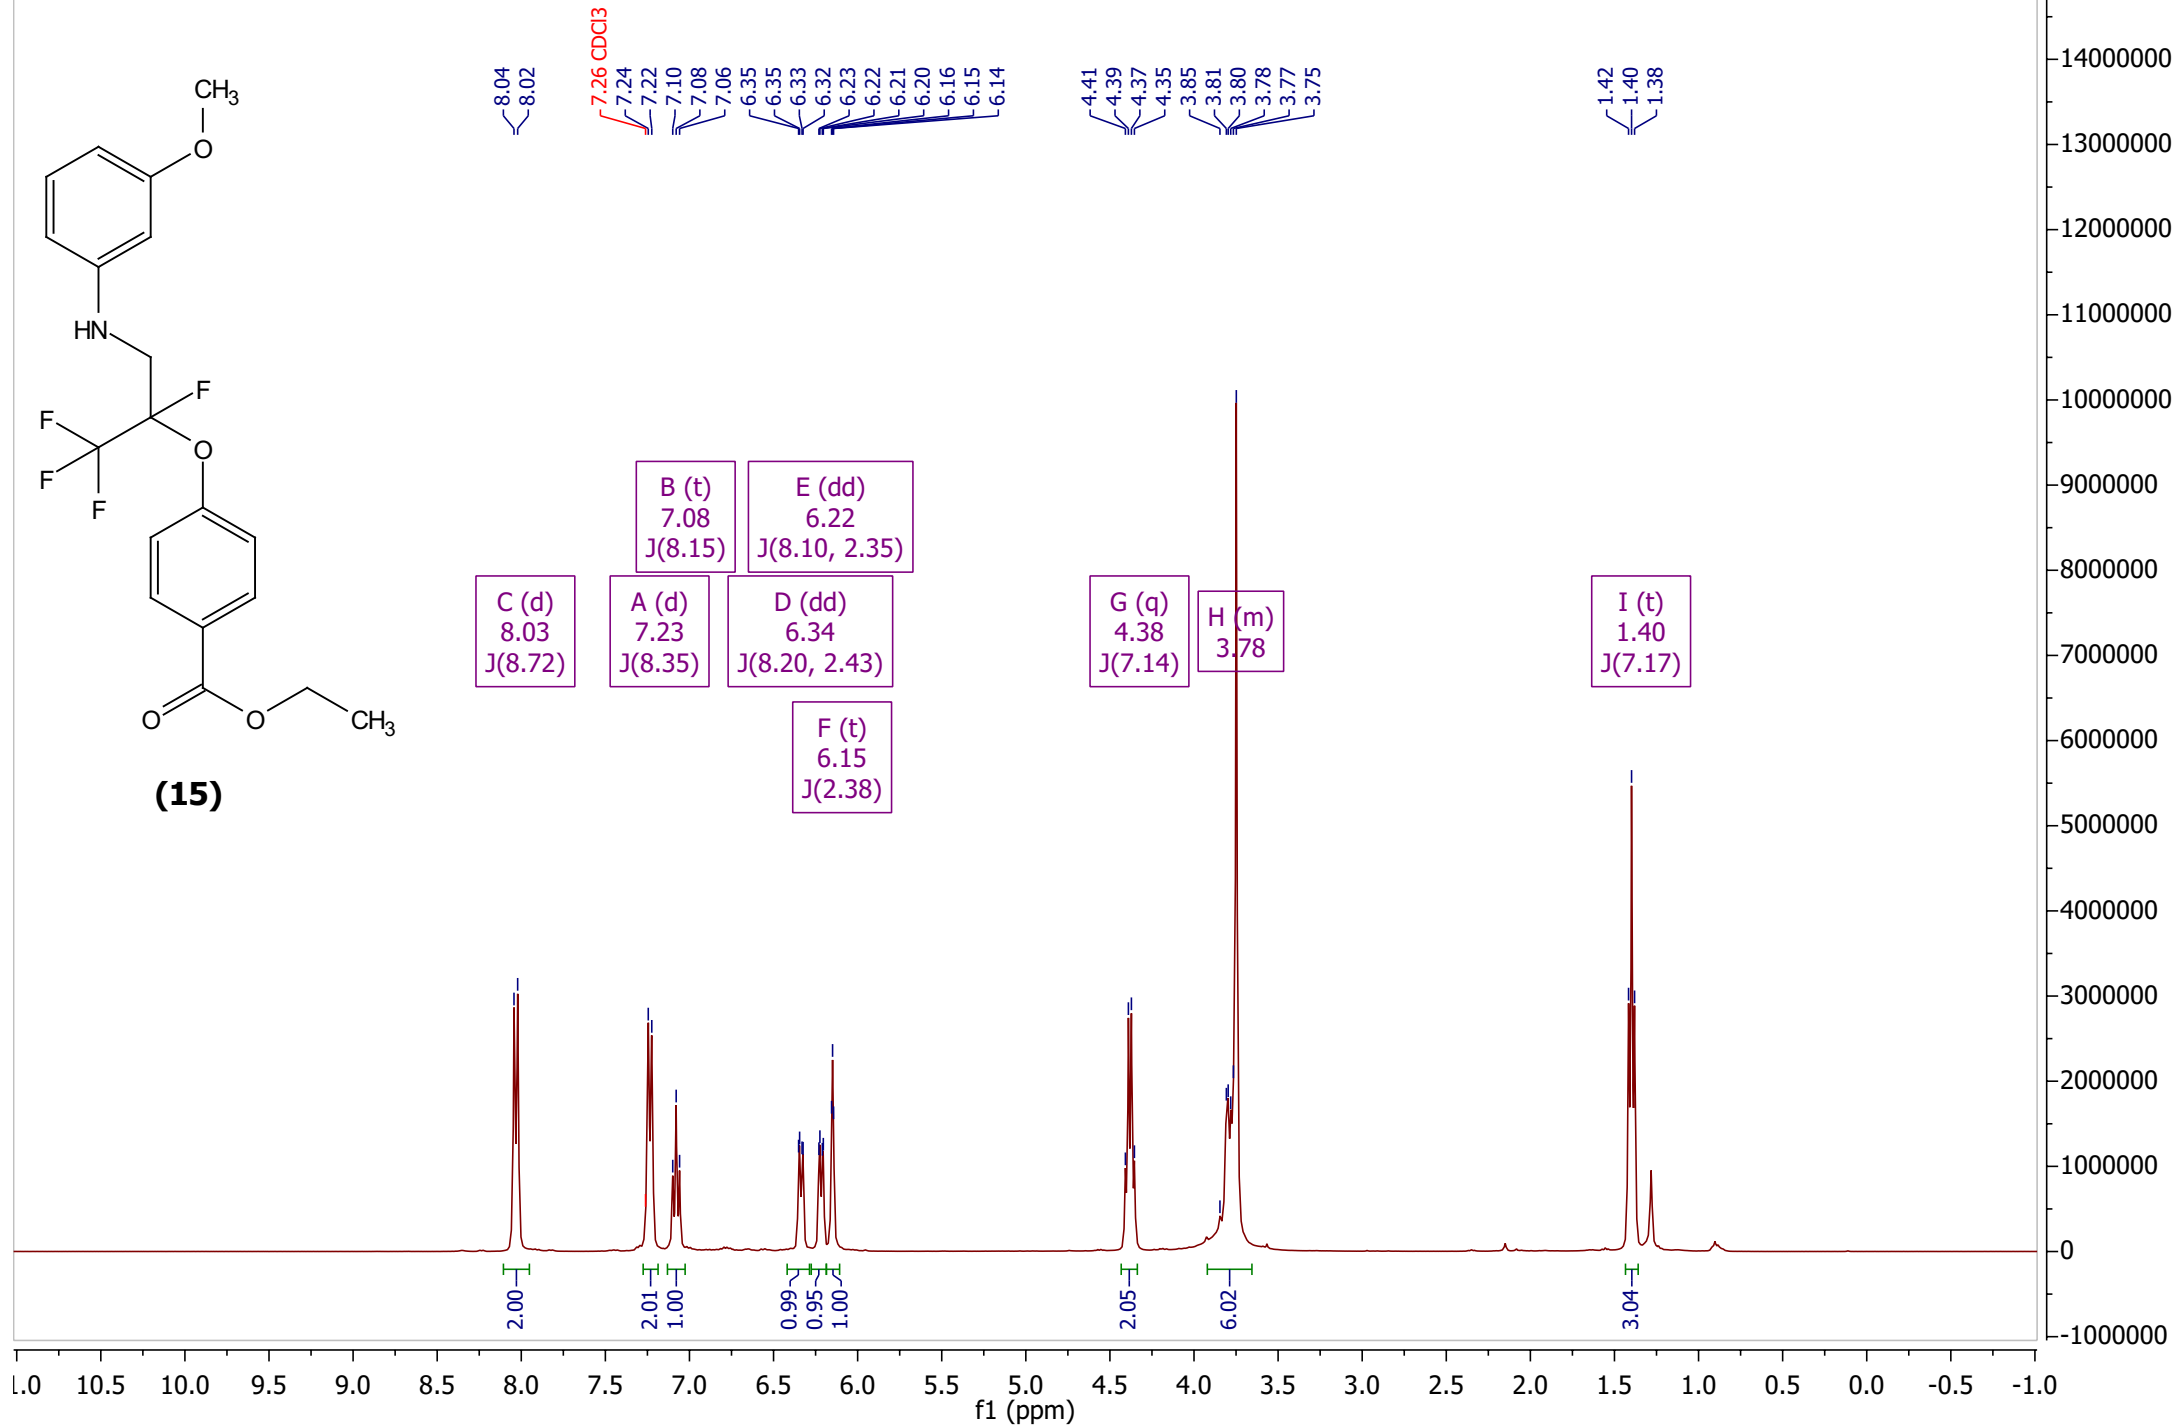

$^{19}\text{F}$  NMR (376 MHz, Chloroform-*d*)  $\delta$  -80.2 (d,  $J = 2.9$  Hz), -125.7 (q,  $J = 2.8$  Hz).

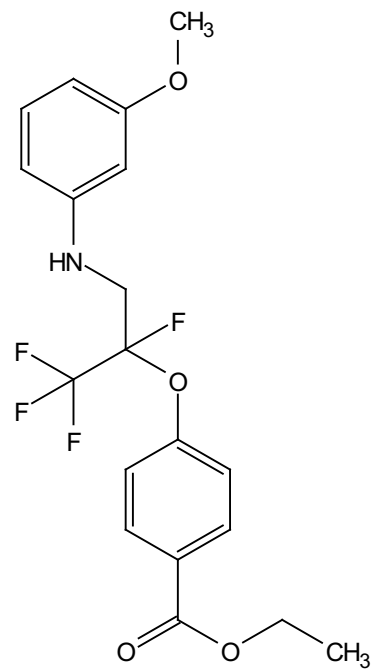

**(15)**

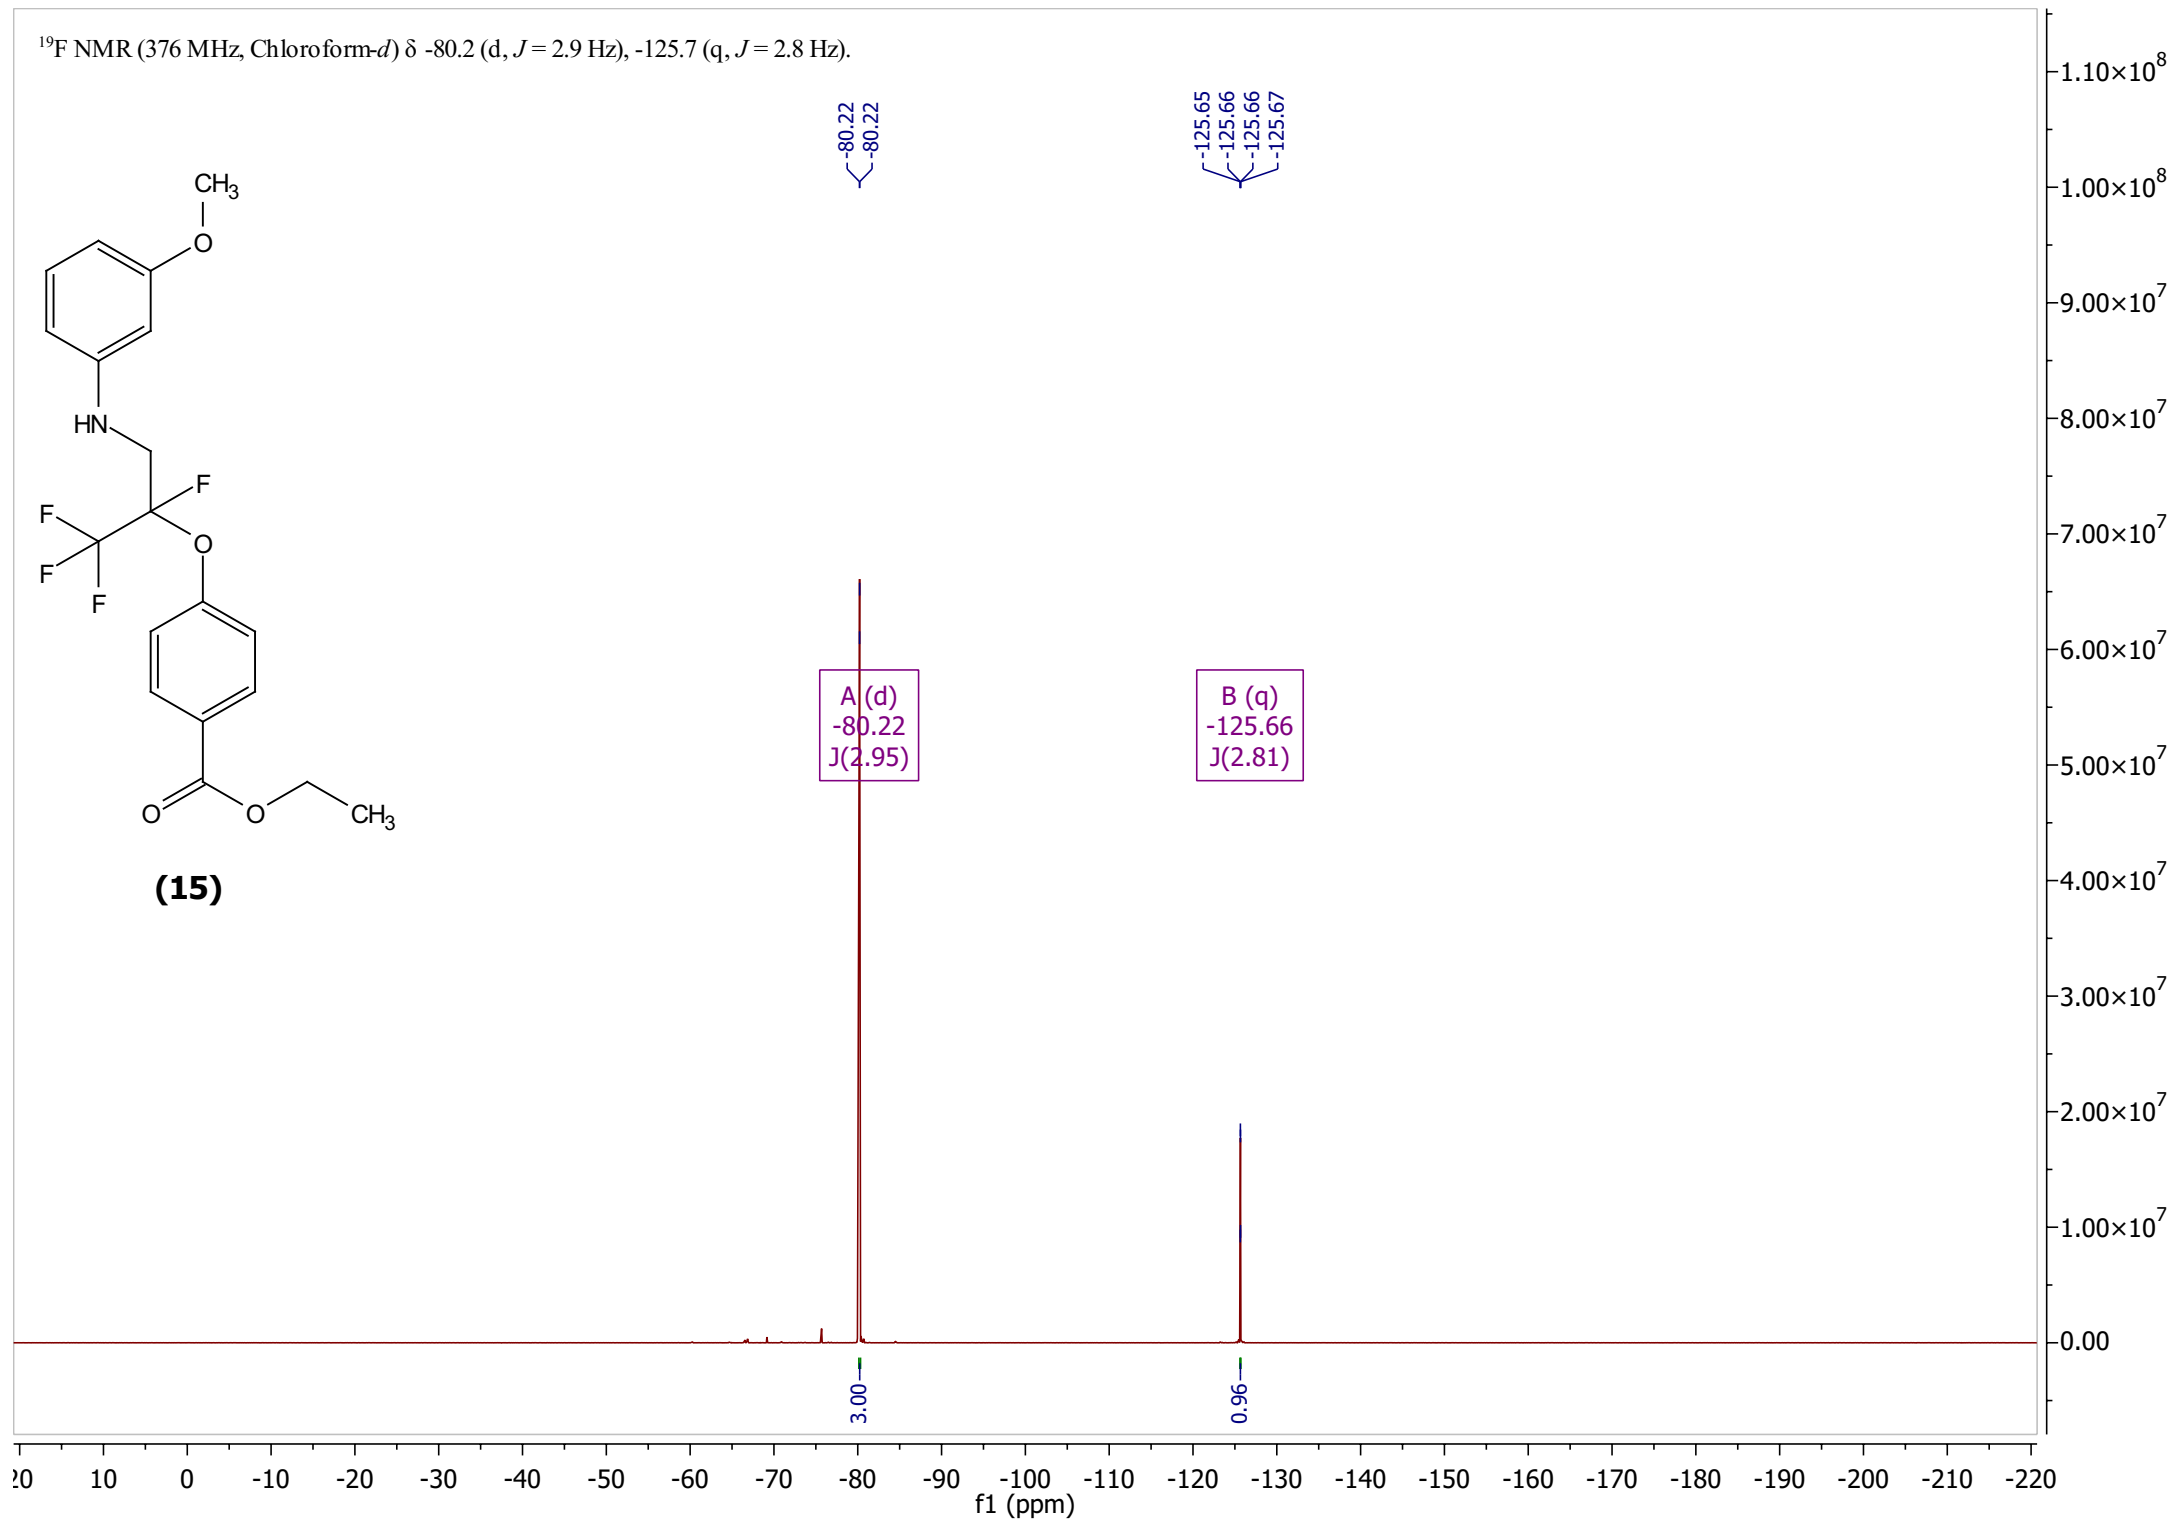



$^{13}\text{C}$  NMR (101 MHz, Chloroform-*d*)  $\delta$  165.8, 160.9, 155.4, 148.0, 131.4, 130.2, 128.2, 121.8 (d,  $J = 2.5$  Hz), 120.6 (qd,  $J = 287.7, 37.6$  Hz), 108.8 (dq,  $J = 241.2, 33.1$  Hz), 106.2, 103.9, 99.5, 61.2, 55.1, 45.0 (d,  $J = 28.4$  Hz), 14.4.

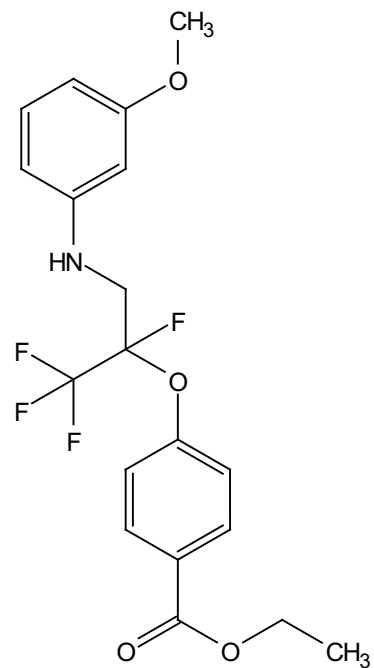

**(15)**

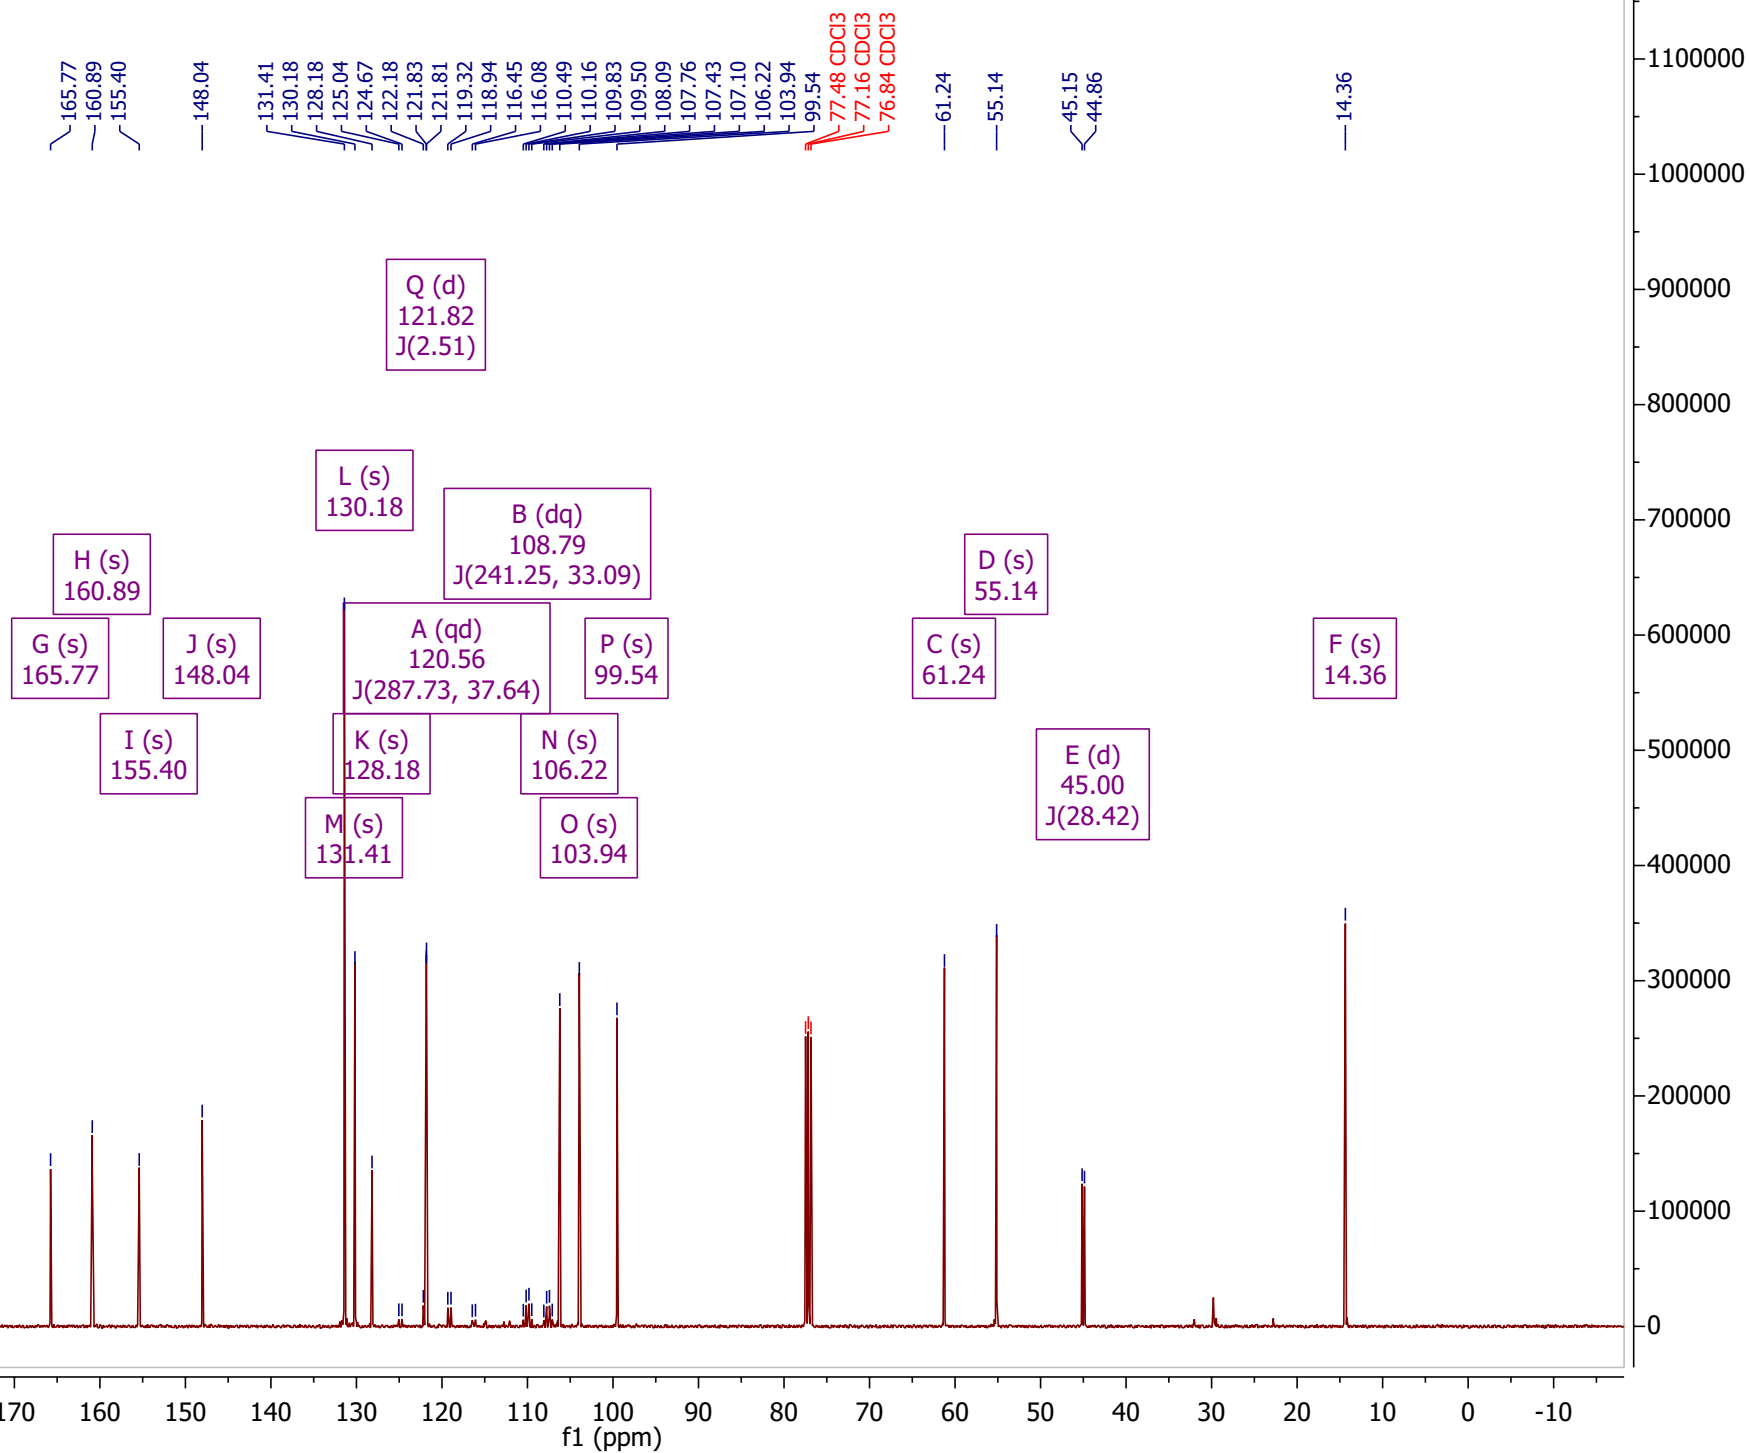

$^1\text{H}$  NMR (400 MHz, Chloroform-*d*)  $\delta$  9.17 (t,  $J = 5.9$  Hz, 1H), 7.90 (d,  $J = 8.9$  Hz, 2H), 7.65 (dd,  $J = 8.0, 1.7$  Hz, 1H), 7.23 (t,  $J = 7.7$  Hz, 1H), 7.18 (d,  $J = 8.1$  Hz, 2H), 6.61 – 6.49 (m, 2H), 4.26 (q,  $J = 7.1$  Hz, 2H), 3.87 – 3.65 (m, 2H), 2.49 (s, 3H), 1.28 (t,  $J = 7.2$  Hz, 3H).

9.18  
9.17  
9.15

7.92  
7.89  
7.66  
7.66  
7.64

7.25  
7.23  
7.21  
7.19  
7.16

6.59  
6.57  
6.54  
6.52

4.29  
4.27  
4.25  
4.23

3.83  
3.82  
3.81  
3.80

3.78  
3.77  
3.76  
3.75  
3.74  
3.72  
3.70  
3.69

2.49  
1.30  
1.28  
1.26

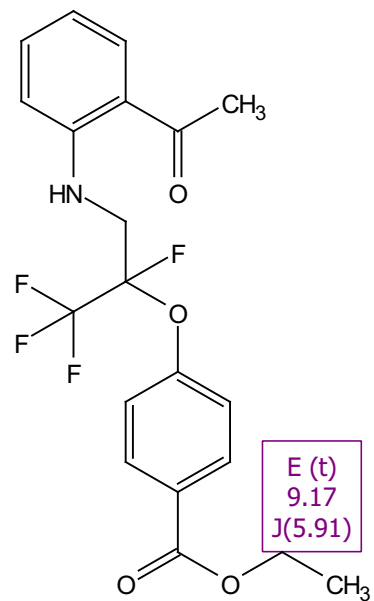

**(16)**

E (t)  
9.17  
J(5.91)

G (dd)  
7.65  
J(8.03, 1.66)

F (d)  
7.90  
J(8.92)

H (t)  
7.23  
J(7.69)

J (m)  
6.55

I (d)  
7.18  
J(8.09)

C (q)  
4.26  
J(7.14)

D (m)  
3.76

B (s)  
2.49

A (t)  
1.28  
J(7.16)

0.97

1.97

0.99

0.99

2.02

2.05

2.00

1.99

3.00

3.00

1.0 10.5 10.0 9.5 9.0 8.5 8.0 7.5 7.0 6.5 6.0 5.5 5.0 4.5 4.0 3.5 3.0 2.5 2.0 1.5 1.0 0.5 0.0 -0.5 -1.0  
f1 (ppm)

17000000  
16000000  
15000000  
14000000  
13000000  
12000000  
11000000  
10000000  
9000000  
8000000  
7000000  
6000000  
5000000  
4000000  
3000000  
2000000  
1000000  
0  
-1000000

$^{19}\text{F}$  NMR (376 MHz, Chloroform-*d*)  $\delta$  -80.7 (d,  $J = 2.8$  Hz), -123.9 (q,  $J = 3.0$  Hz).

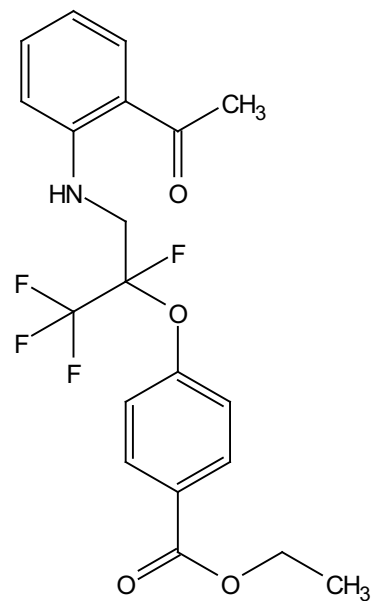

**(16)**

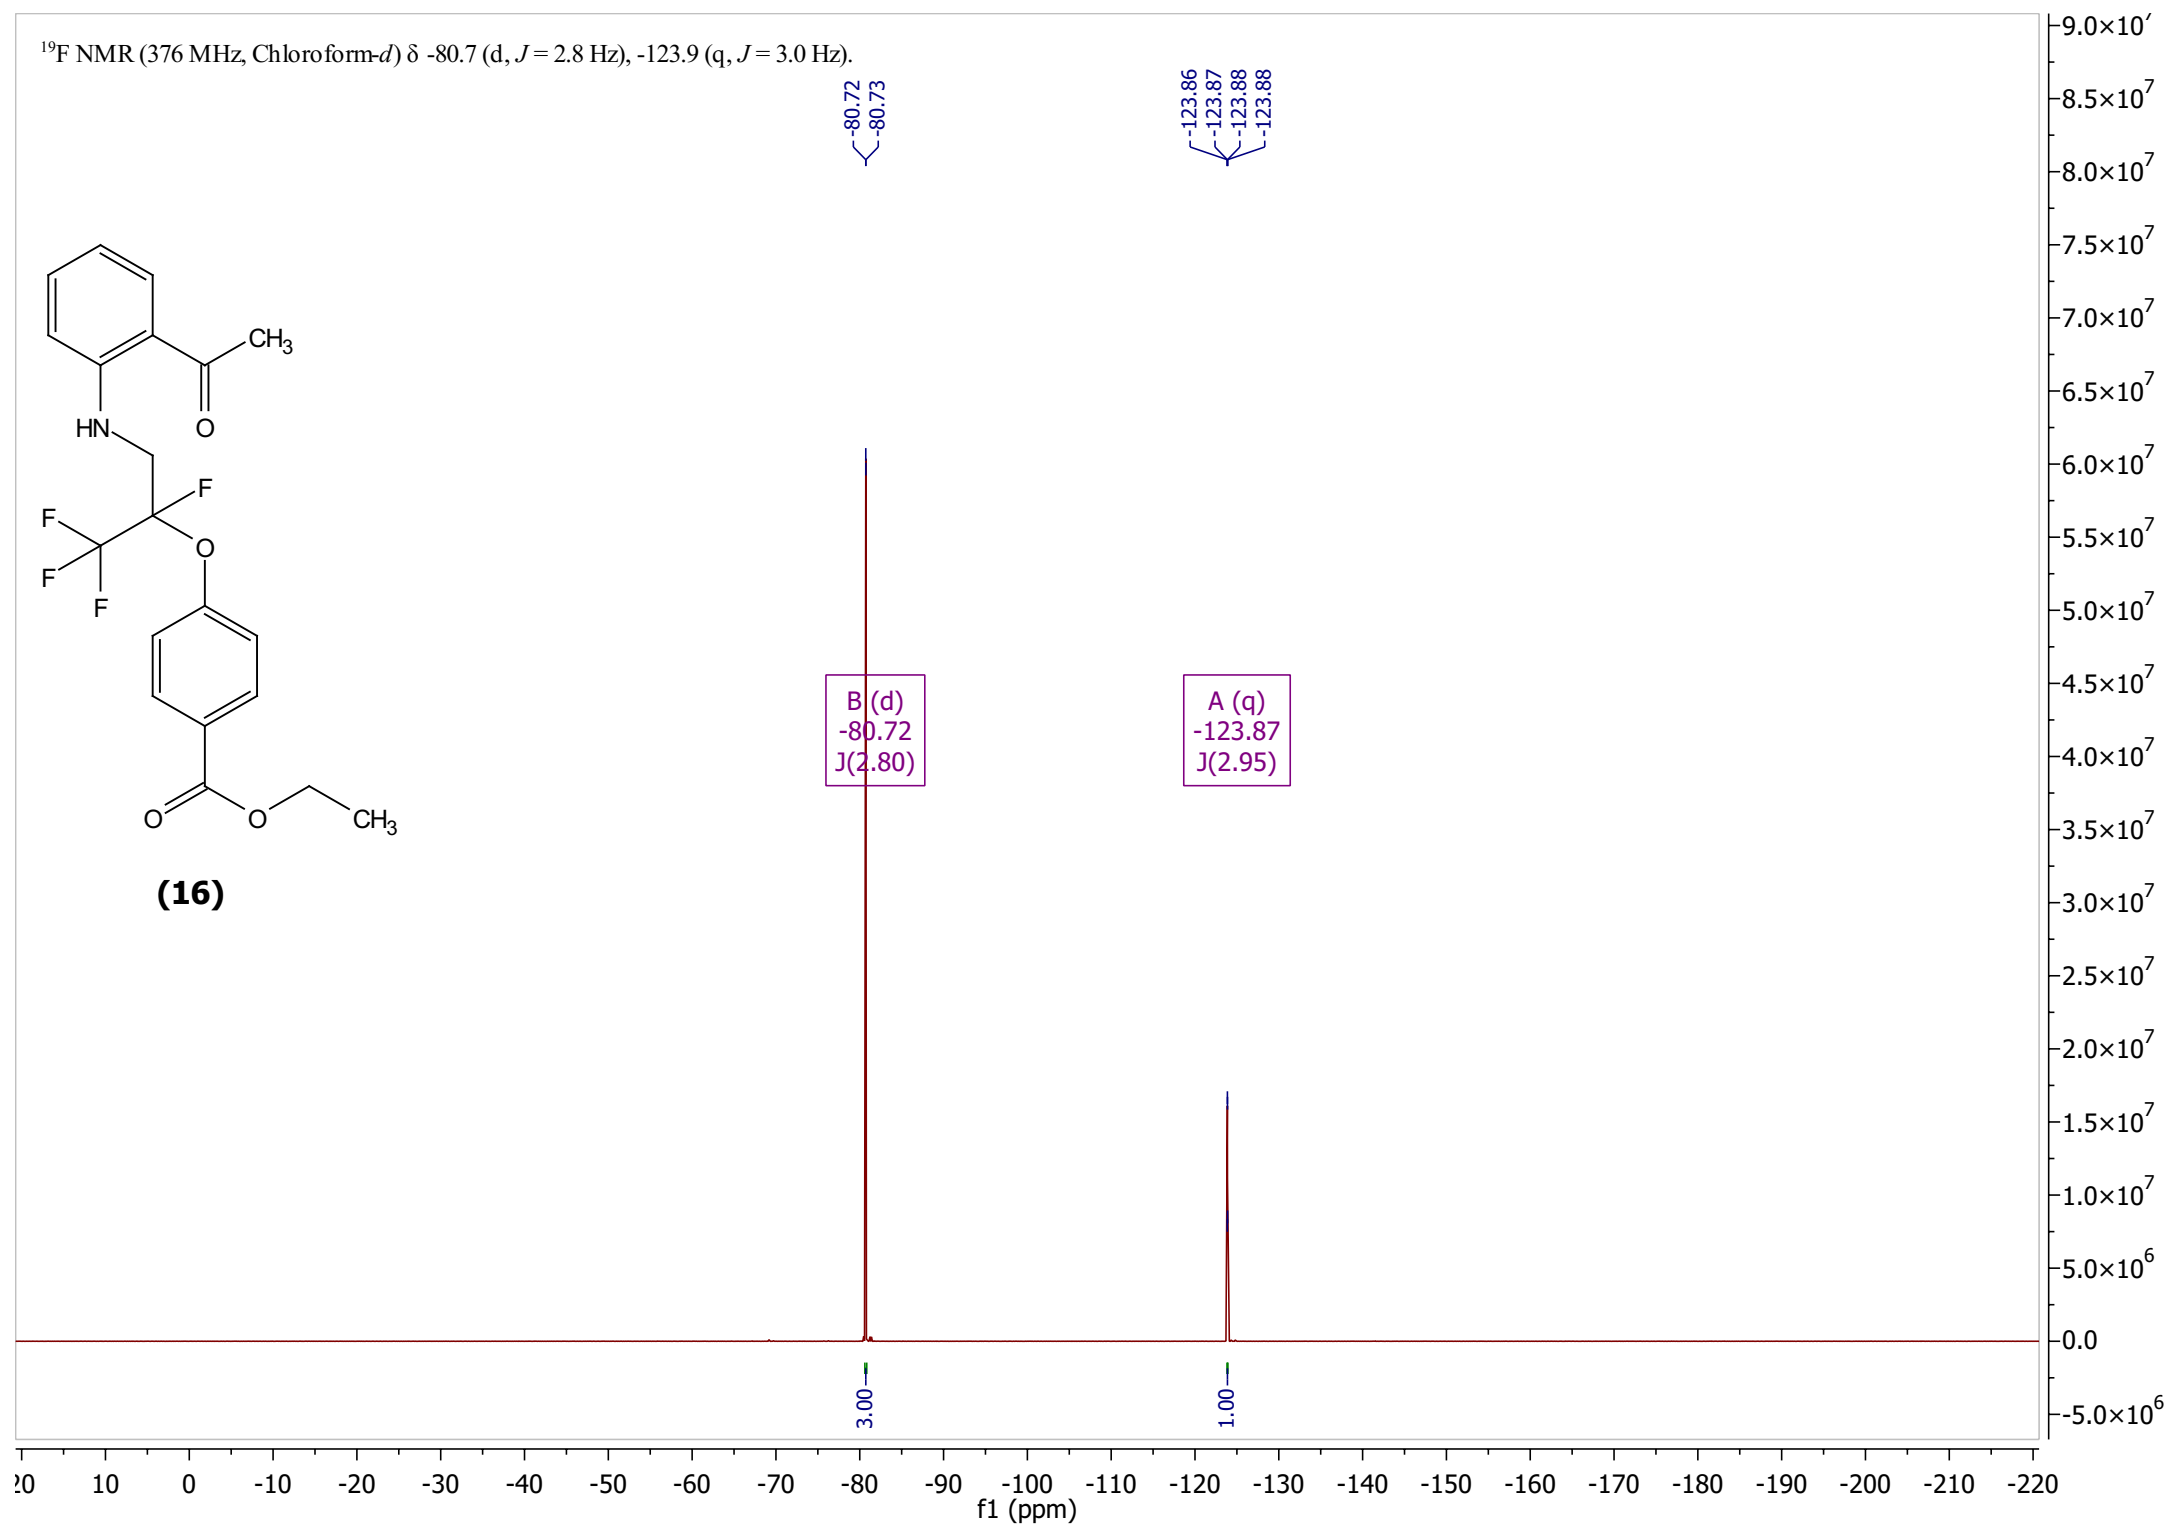

$^{13}\text{C}$  NMR (101 MHz, Chloroform-*d*)  $\delta$  201.3, 165.8, 155.2, 149.8, 135.1, 132.8, 131.4, 128.2, 121.9 (d,  $J = 2.5$  Hz), 120.5 (qd,  $J = 287.7, 36.7$  Hz), 118.6, 115.7, 111.4, 108.7 (dq,  $J = 240.5, 33.5$  Hz), 61.2, 43.1 (d,  $J = 31.1$  Hz), 28.0, 14.4.

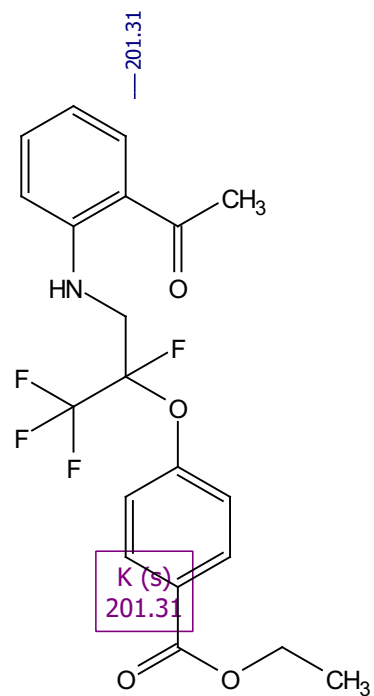

(16)

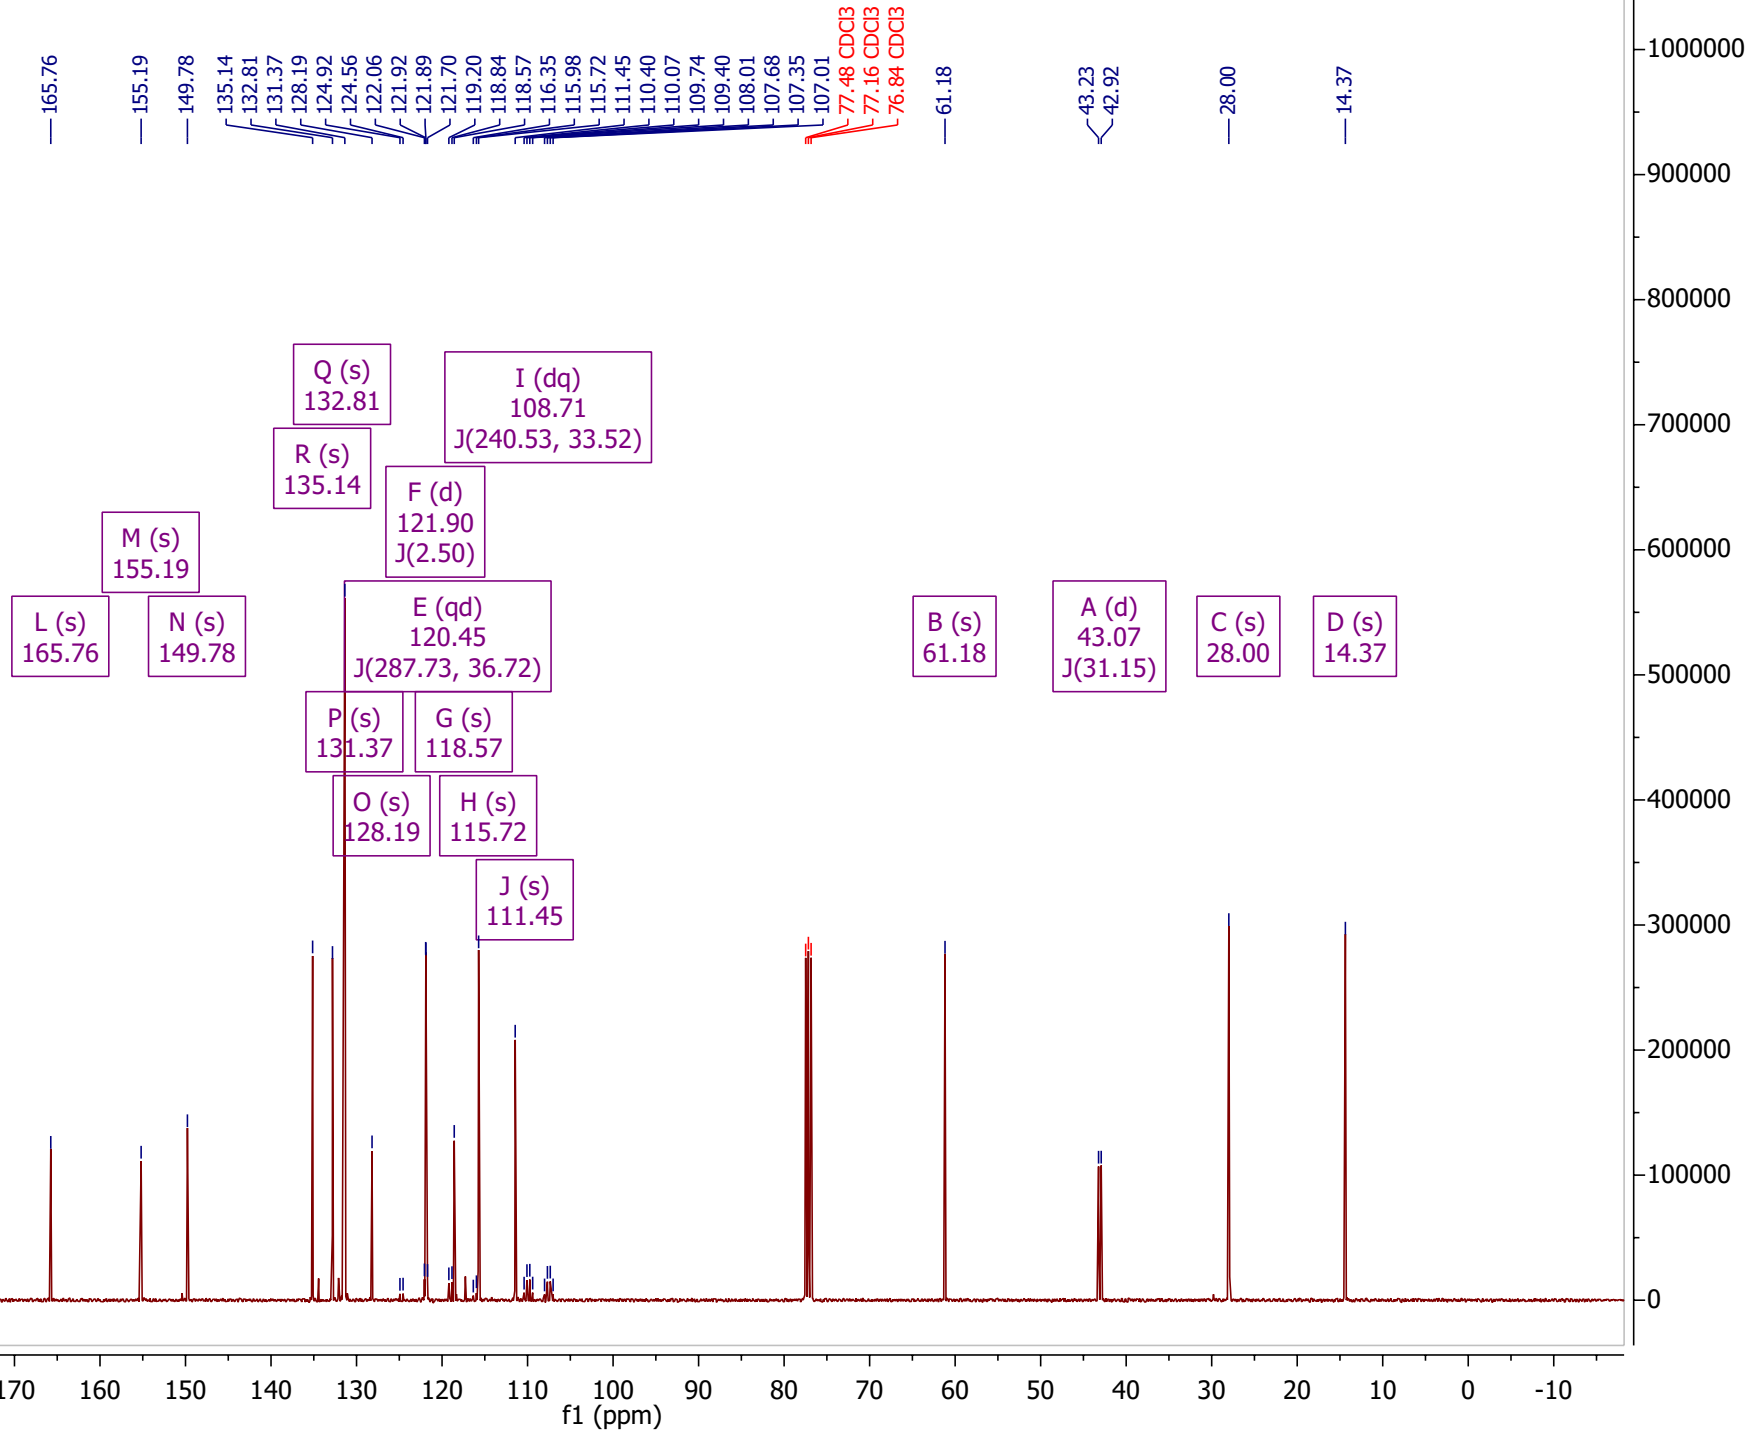

<sup>1</sup>H NMR (400 MHz, Chloroform-*d*) δ 7.93 (d, *J* = 8.9 Hz, 2H), 7.55 (dd, *J* = 7.8, 1.6 Hz, 1H), 7.17 (d, *J* = 8.0 Hz, 2H), 7.07 (t, *J* = 7.2 Hz, 1H), 6.45 – 6.36 (m, 2H), 4.31 (s, 1H), 4.27 (q, *J* = 7.2 Hz, 2H), 3.72 (dd, *J* = 10.5, 6.4 Hz, 2H), 1.29 (t, *J* = 7.2 Hz, 3H).

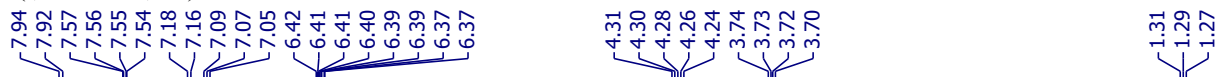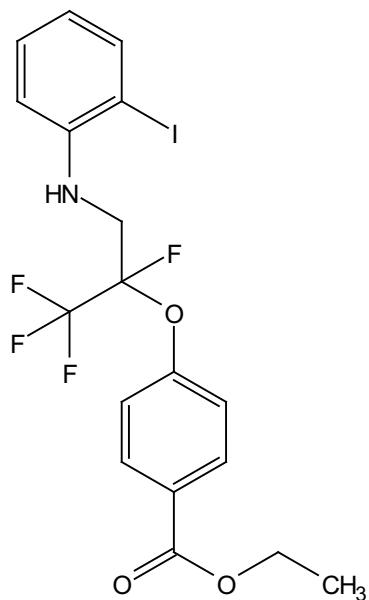

**(17)**

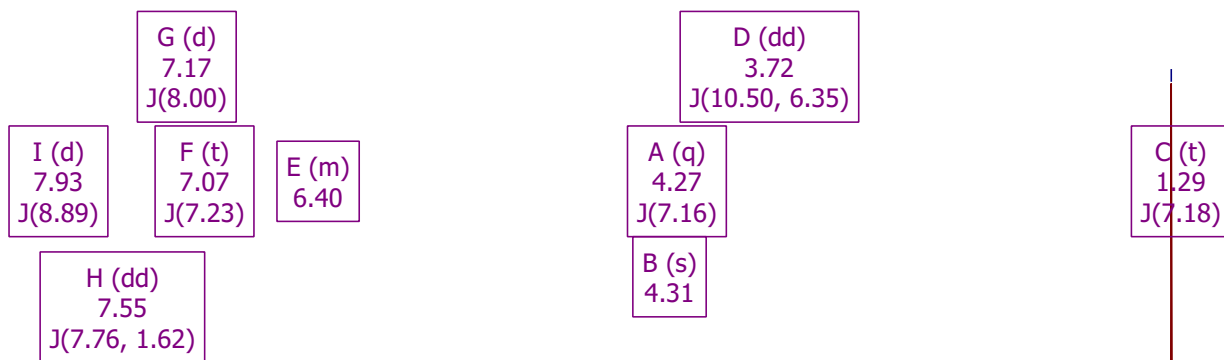

f1 (ppm)

$^{19}\text{F}$  NMR (376 MHz, Chloroform-*d*)  $\delta$  -80.4 (d,  $J = 3.1$  Hz), -124.7 (q,  $J = 3.0$  Hz).

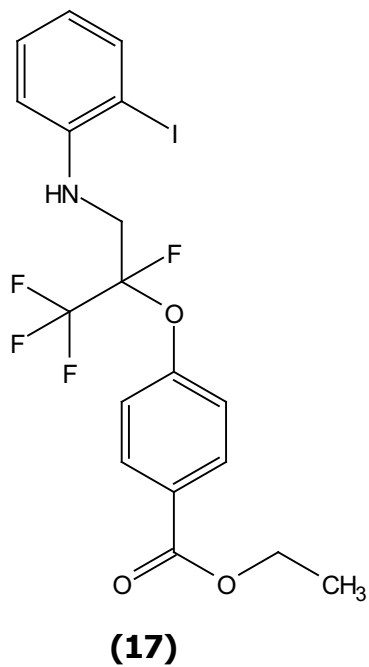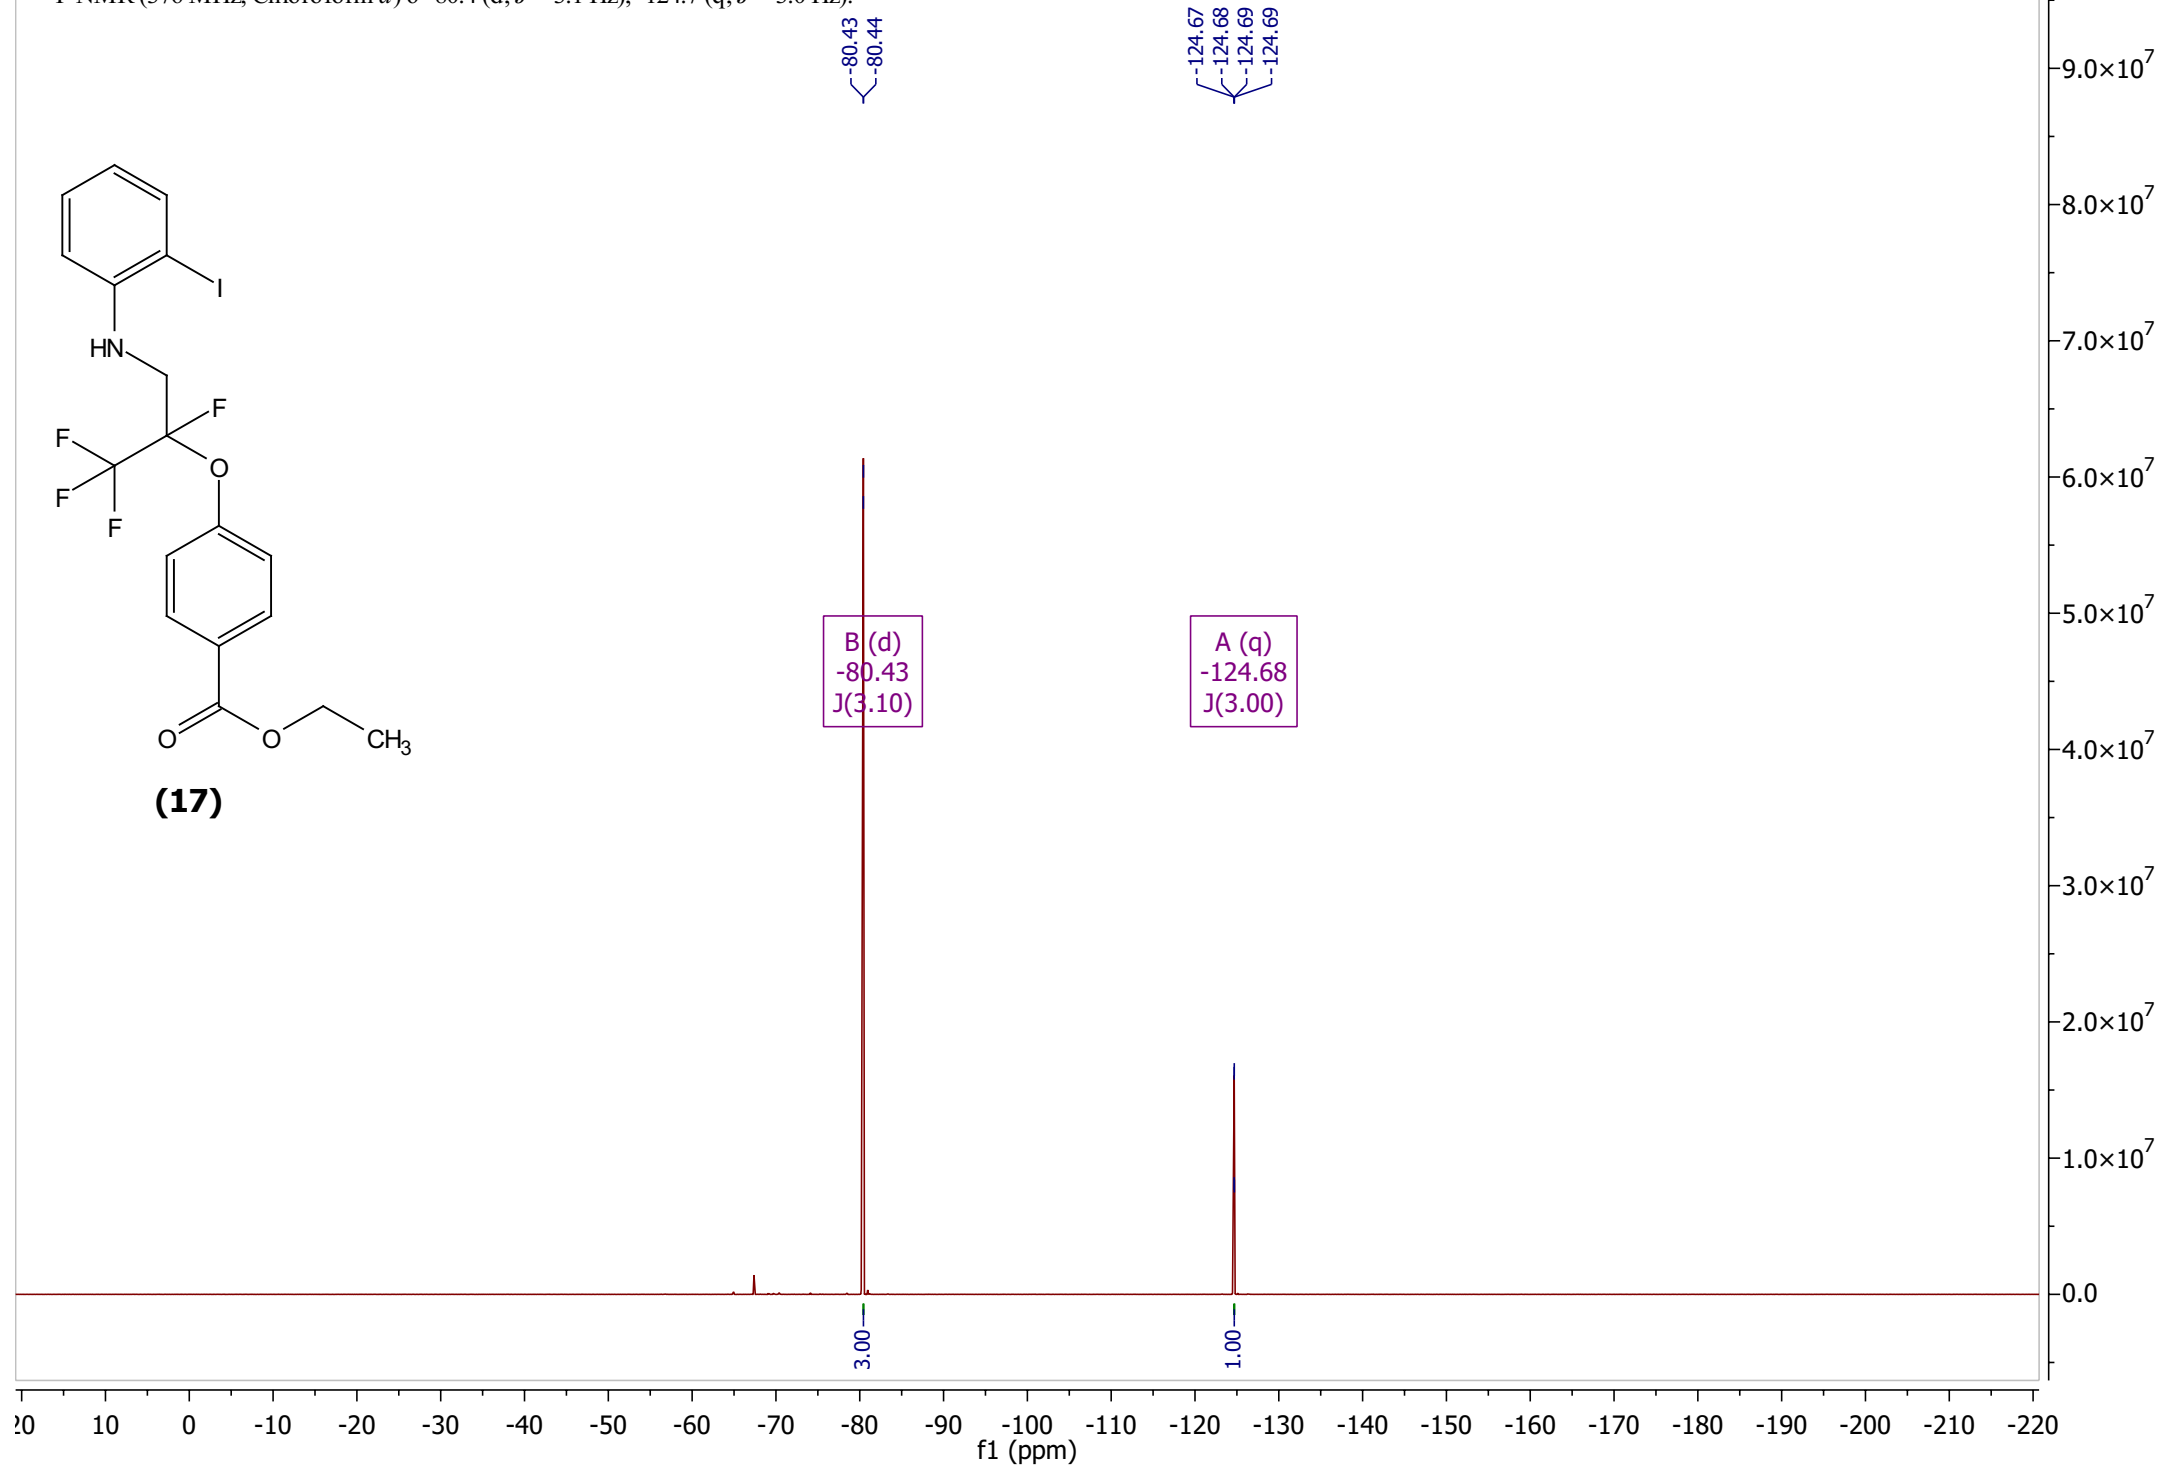

$^{13}\text{C}$  NMR (101 MHz, Chloroform-*d*)  $\delta$  165.7, 155.2, 145.7, 139.3, 131.5, 129.5, 128.4, 121.9 (d,  $J = 2.4$  Hz), 120.5 (qd,  $J = 287.9, 37.1$  Hz), 120.2, 110.8, 108.6 (dq,  $J = 240.9, 33.4$  Hz), 85.8, 61.3, 44.7 (d,  $J = 30.2$  Hz), 14.4.

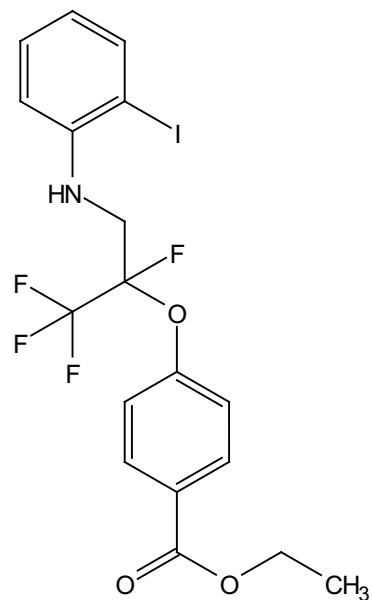

**(17)**

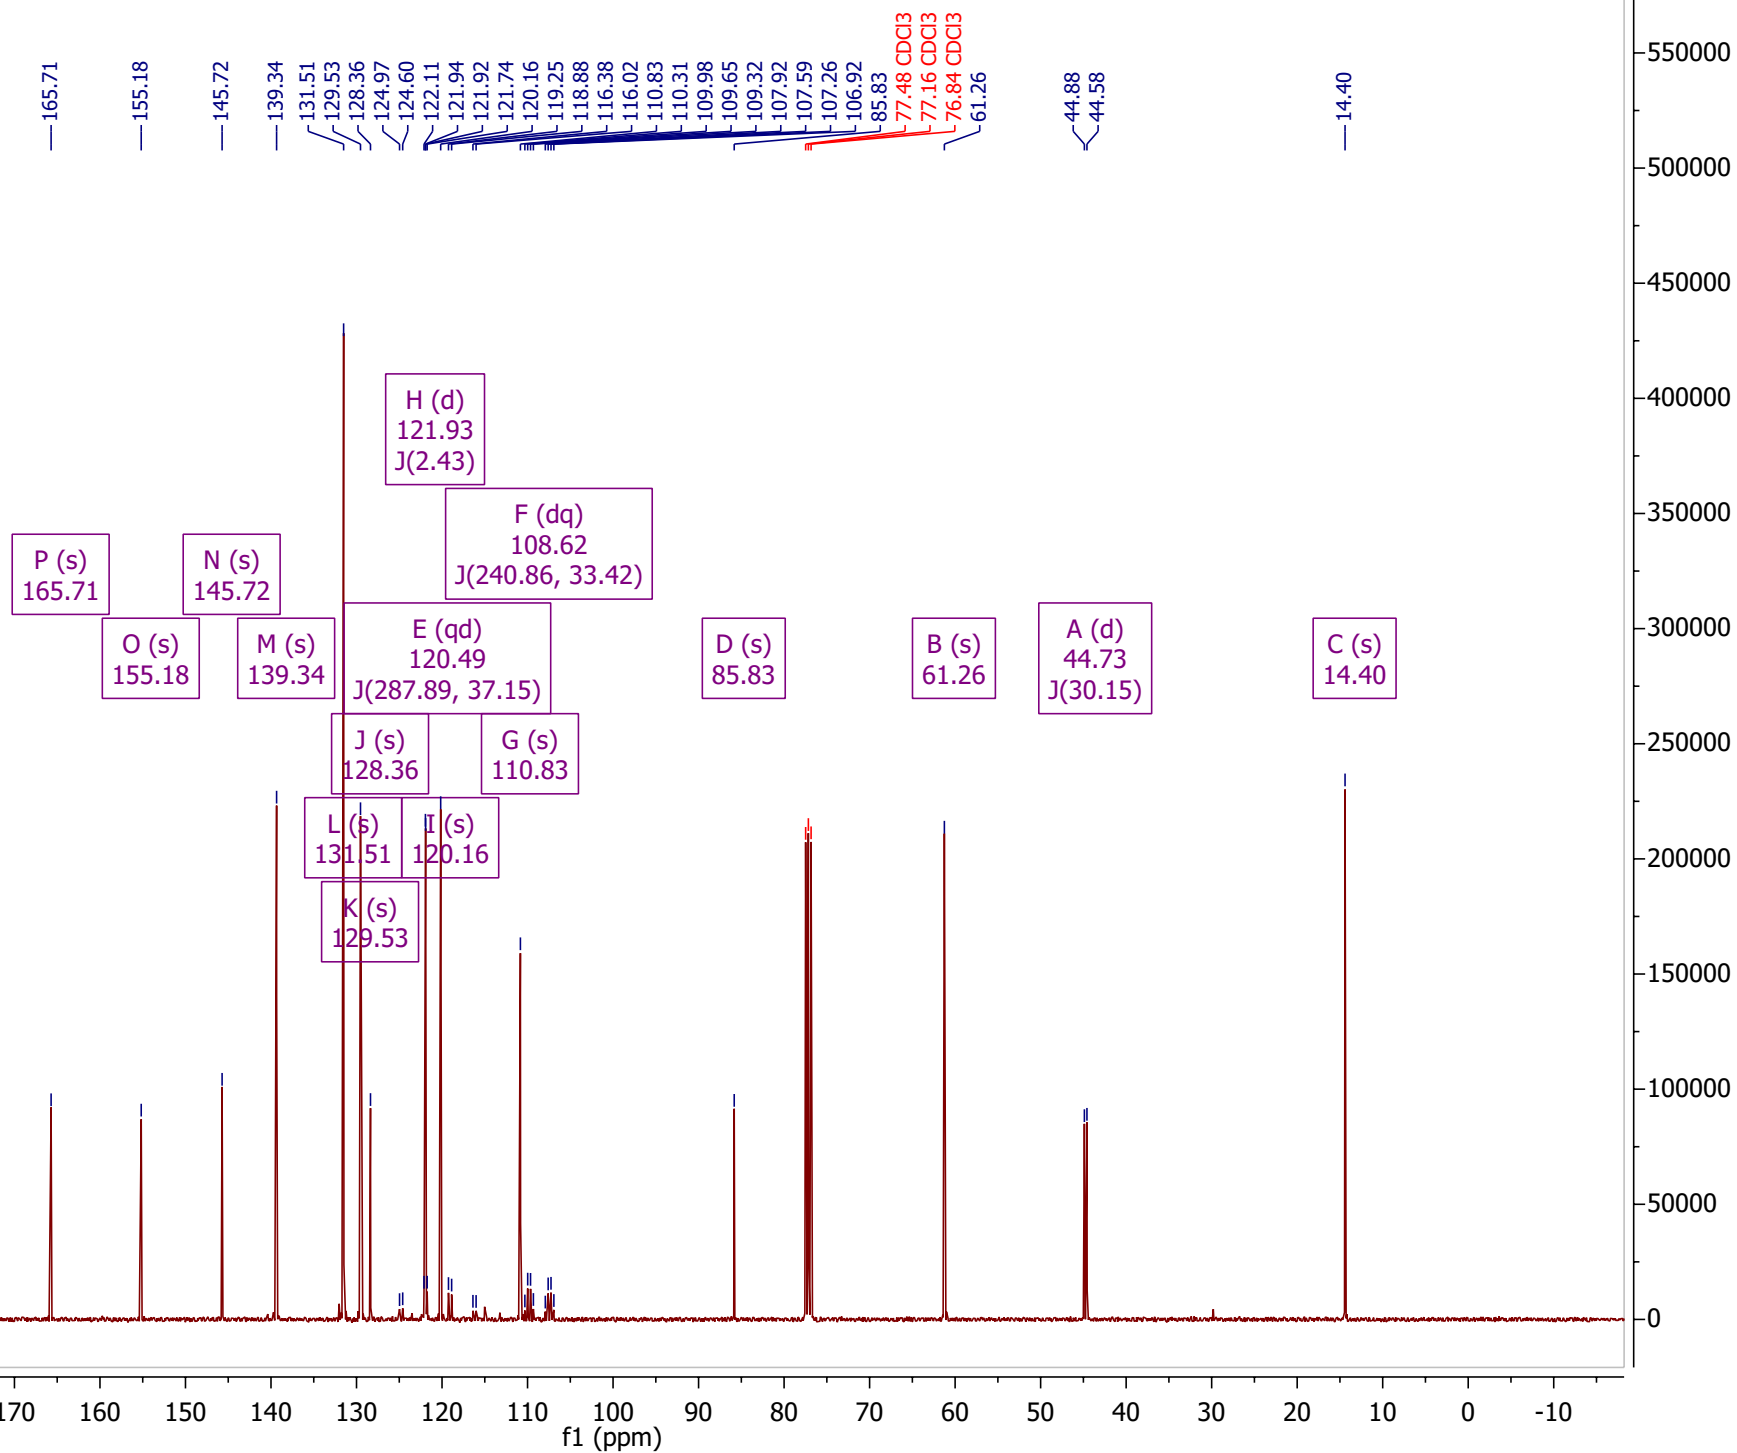

$^1\text{H}$  NMR (400 MHz, Chloroform-*d*)  $\delta$  7.92 (d,  $J = 8.8$  Hz, 2H), 7.14 (d,  $J = 8.6$  Hz, 2H), 6.72 (td,  $J = 7.5, 1.6$  Hz, 1H), 6.67 (dd,  $J = 8.0, 1.6$  Hz, 1H), 6.61 (td,  $J = 7.6, 1.6$  Hz, 1H), 6.44 (d,  $J = 7.7$  Hz, 1H), 4.39 (s, 1H), 4.27 (q,  $J = 7.1$  Hz, 2H), 3.70 (d,  $J = 17.5$  Hz, 5H), 1.29 (t,  $J = 7.2$  Hz, 3H).

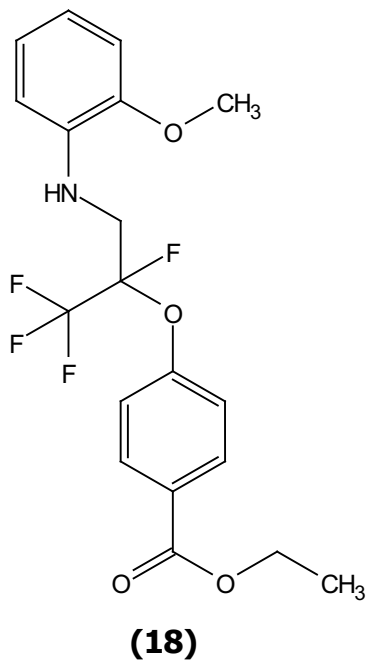

7.93  
7.91  
7.15  
7.13  
7.14  
6.74  
6.74  
6.73  
6.72  
6.71  
6.70  
6.68  
6.66  
6.66  
6.63  
6.62  
6.61  
6.59  
6.59  
6.45  
6.43  
4.39  
4.30  
4.28  
4.26  
4.24  
3.72  
3.70  
3.68  
1.30  
1.29  
1.27

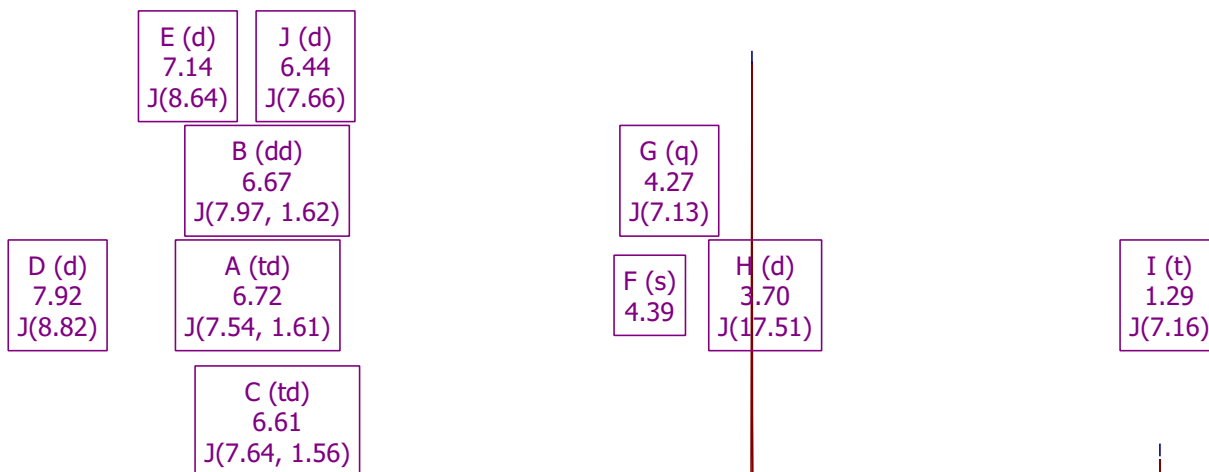

2.00  
2.04  
1.00  
1.00  
1.00  
1.00  
0.97  
2.05  
5.02  
3.03

10.5 10.0 9.5 9.0 8.5 8.0 7.5 7.0 6.5 6.0 5.5 5.0 4.5 4.0 3.5 3.0 2.5 2.0 1.5 1.0 0.5 0.0 -0.5 -1.0  
f1 (ppm)



$^{19}\text{F}$  NMR (376 MHz, Chloroform-*d*)  $\delta$  -80.5 (d,  $J = 2.9$  Hz), -125.2 (q,  $J = 2.9$  Hz).

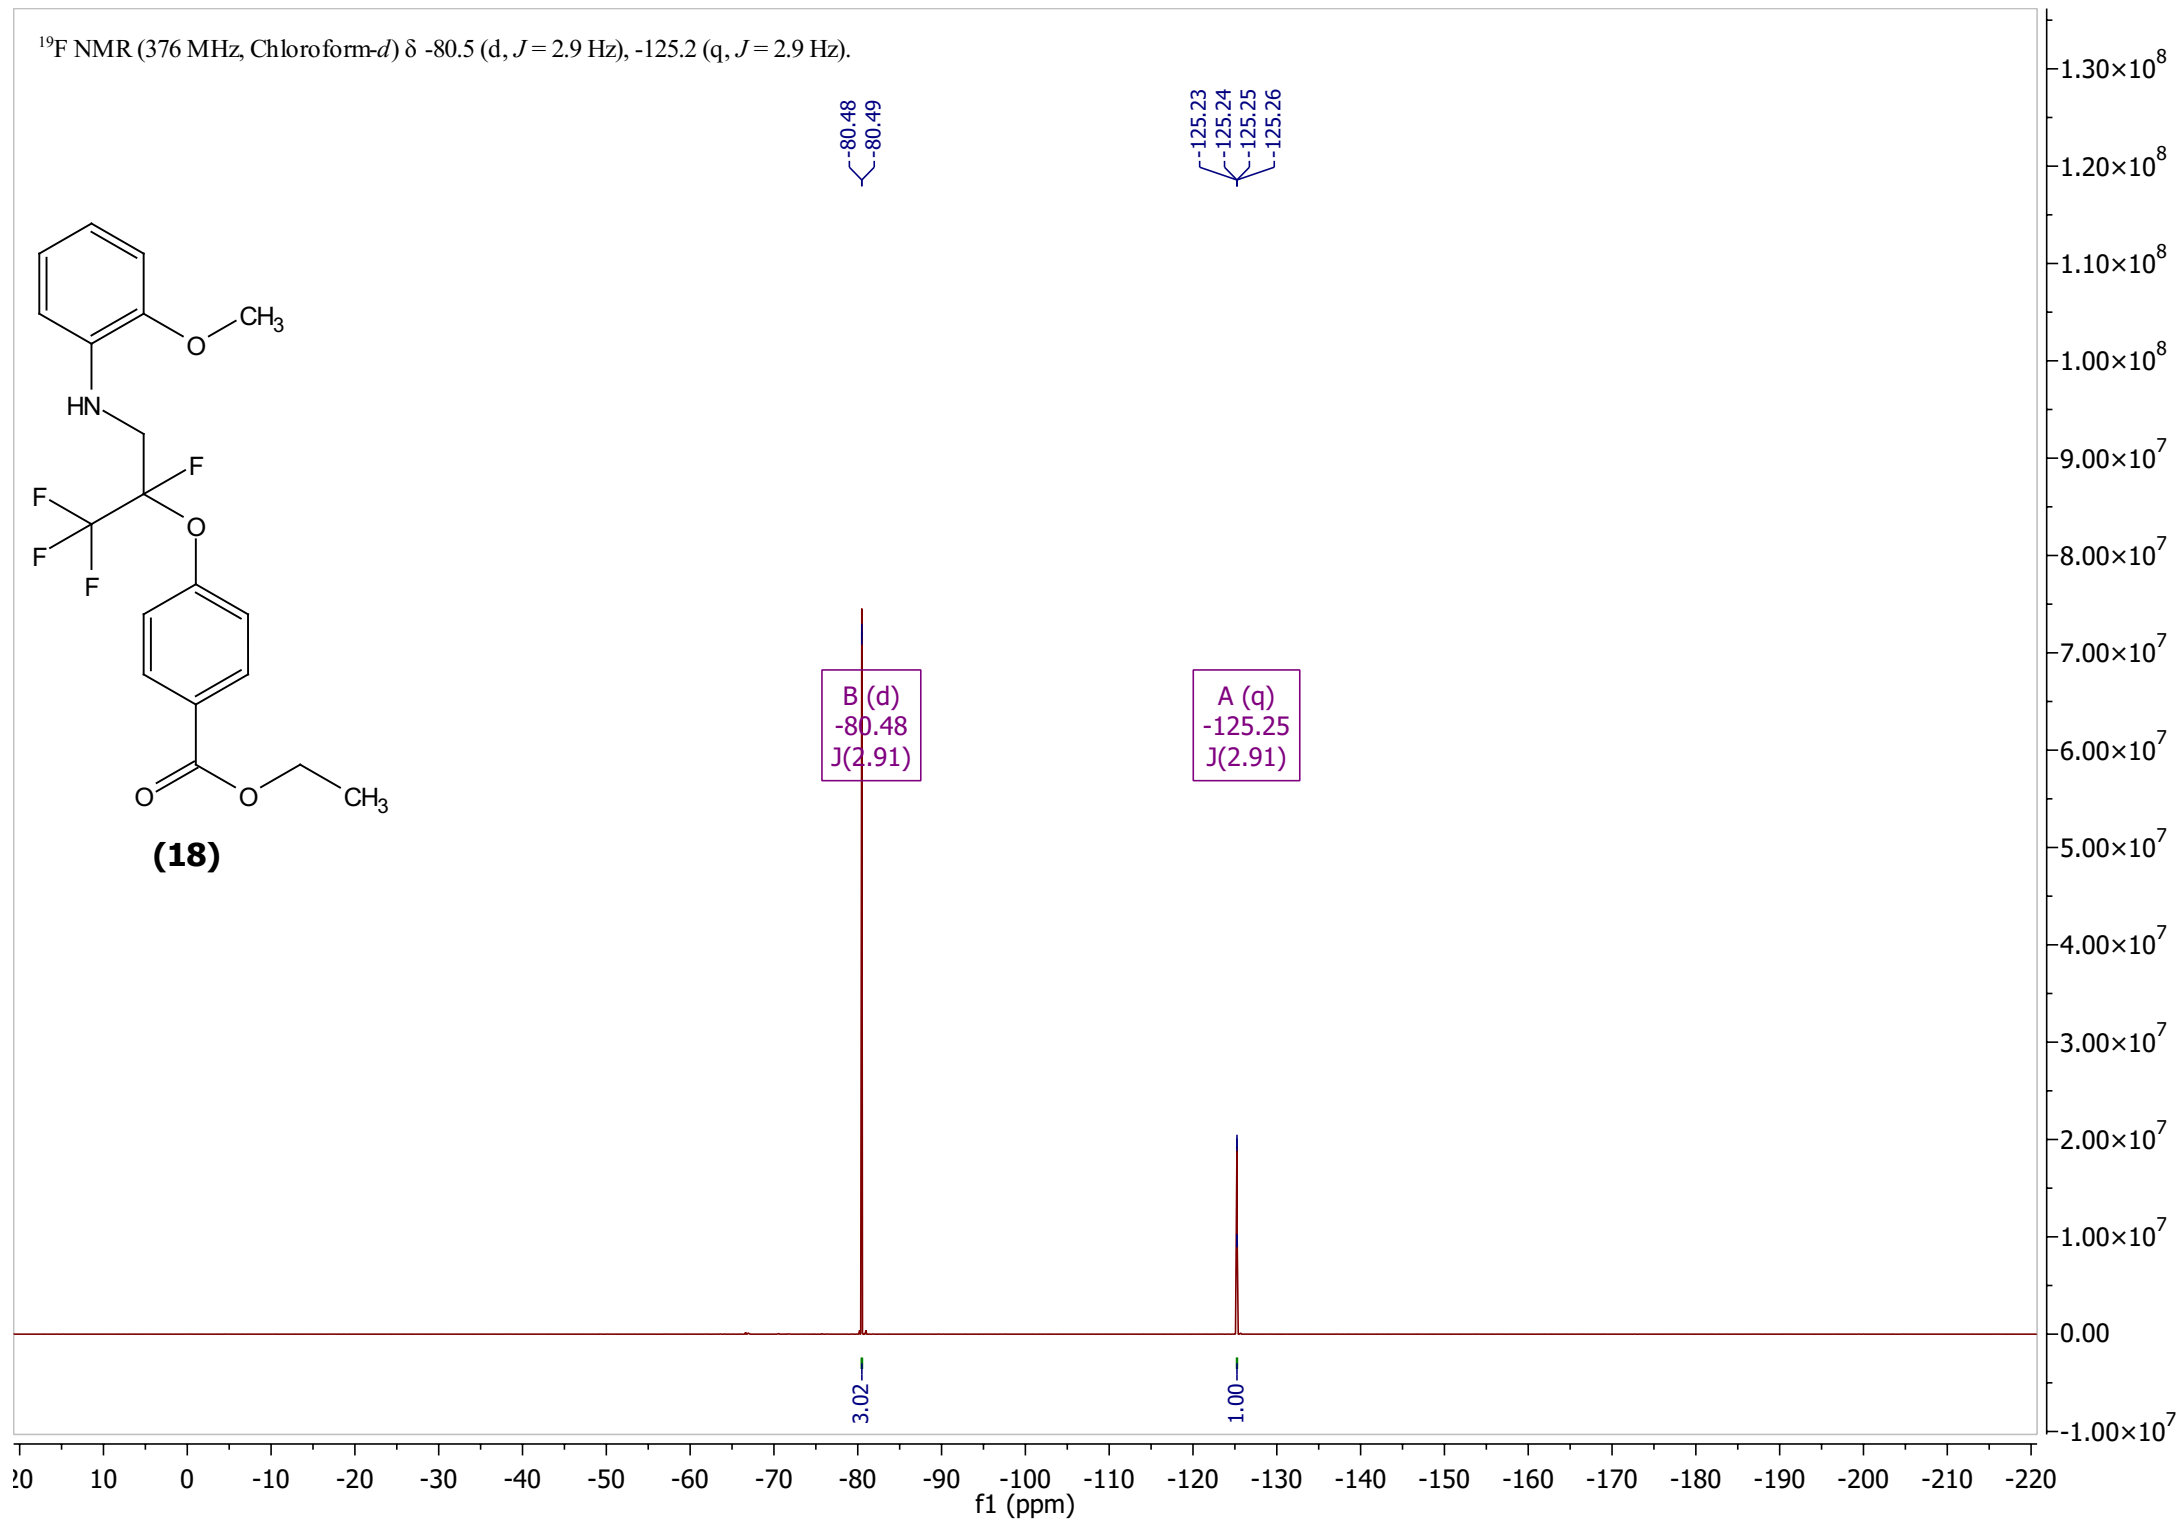

$^{13}\text{C}$  NMR (101 MHz, Chloroform-*d*)  $\delta$  165.8, 155.4, 147.0, 136.6, 131.4, 128.1, 121.9 (d,  $J = 2.6$  Hz), 121.2, 120.6 (qd,  $J = 287.9, 37.4$  Hz), 118.0, 110.2, 109.9, 109.0 (dq,  $J = 240.9, 33.3$  Hz), 61.2, 55.6, 44.7 (d,  $J = 29.1$  Hz), 14.4.

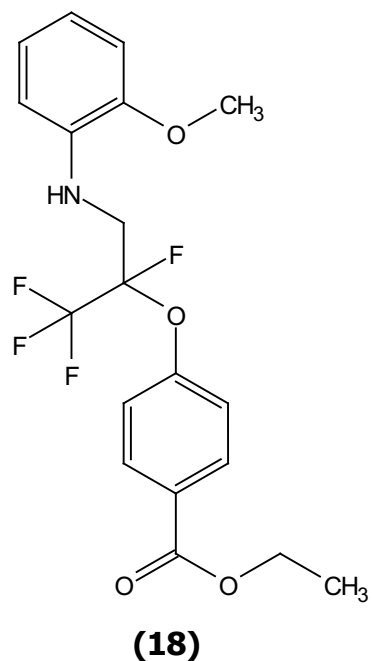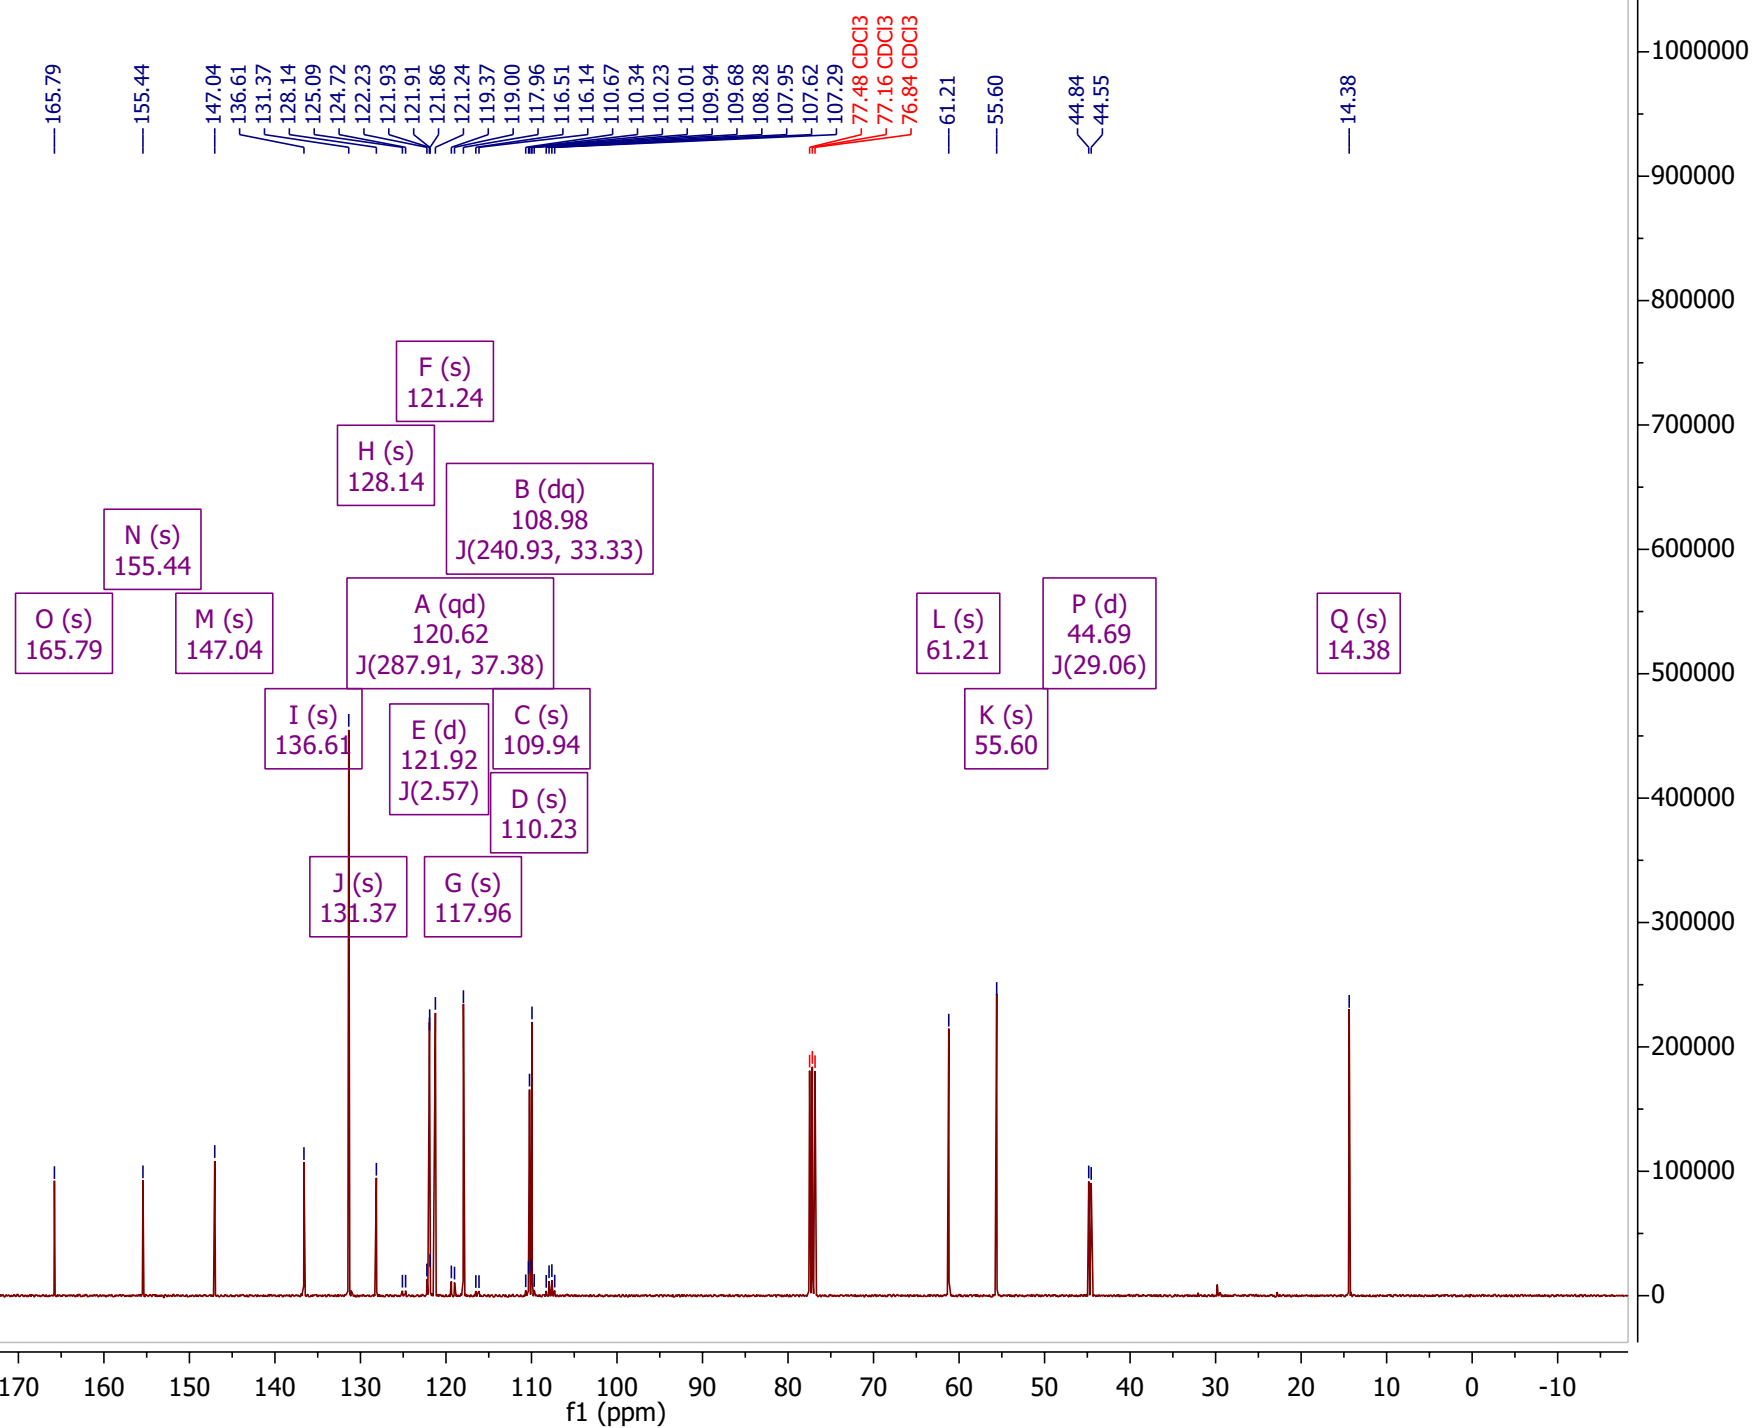

$^1\text{H}$  NMR (400 MHz, Chloroform-*d*)  $\delta$  7.93 (d,  $J$  = 8.8 Hz, 2H), 7.14 (d,  $J$  = 7.8 Hz, 2H), 7.02 – 6.93 (m, 2H), 6.61 (t,  $J$  = 7.4 Hz, 1H), 6.44 (d,  $J$  = 8.1 Hz, 1H), 4.27 (q,  $J$  = 7.1 Hz, 3H), 3.73 (d,  $J$  = 11.2 Hz, 2H), 3.57 (s, 1H), 2.01 (s, 3H), 1.29 (t,  $J$  = 7.2 Hz, 3H).

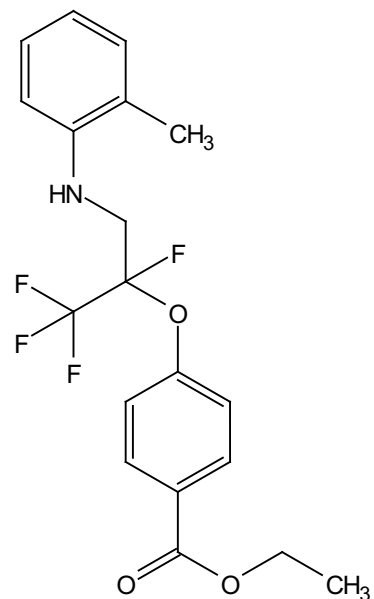

**(19)**

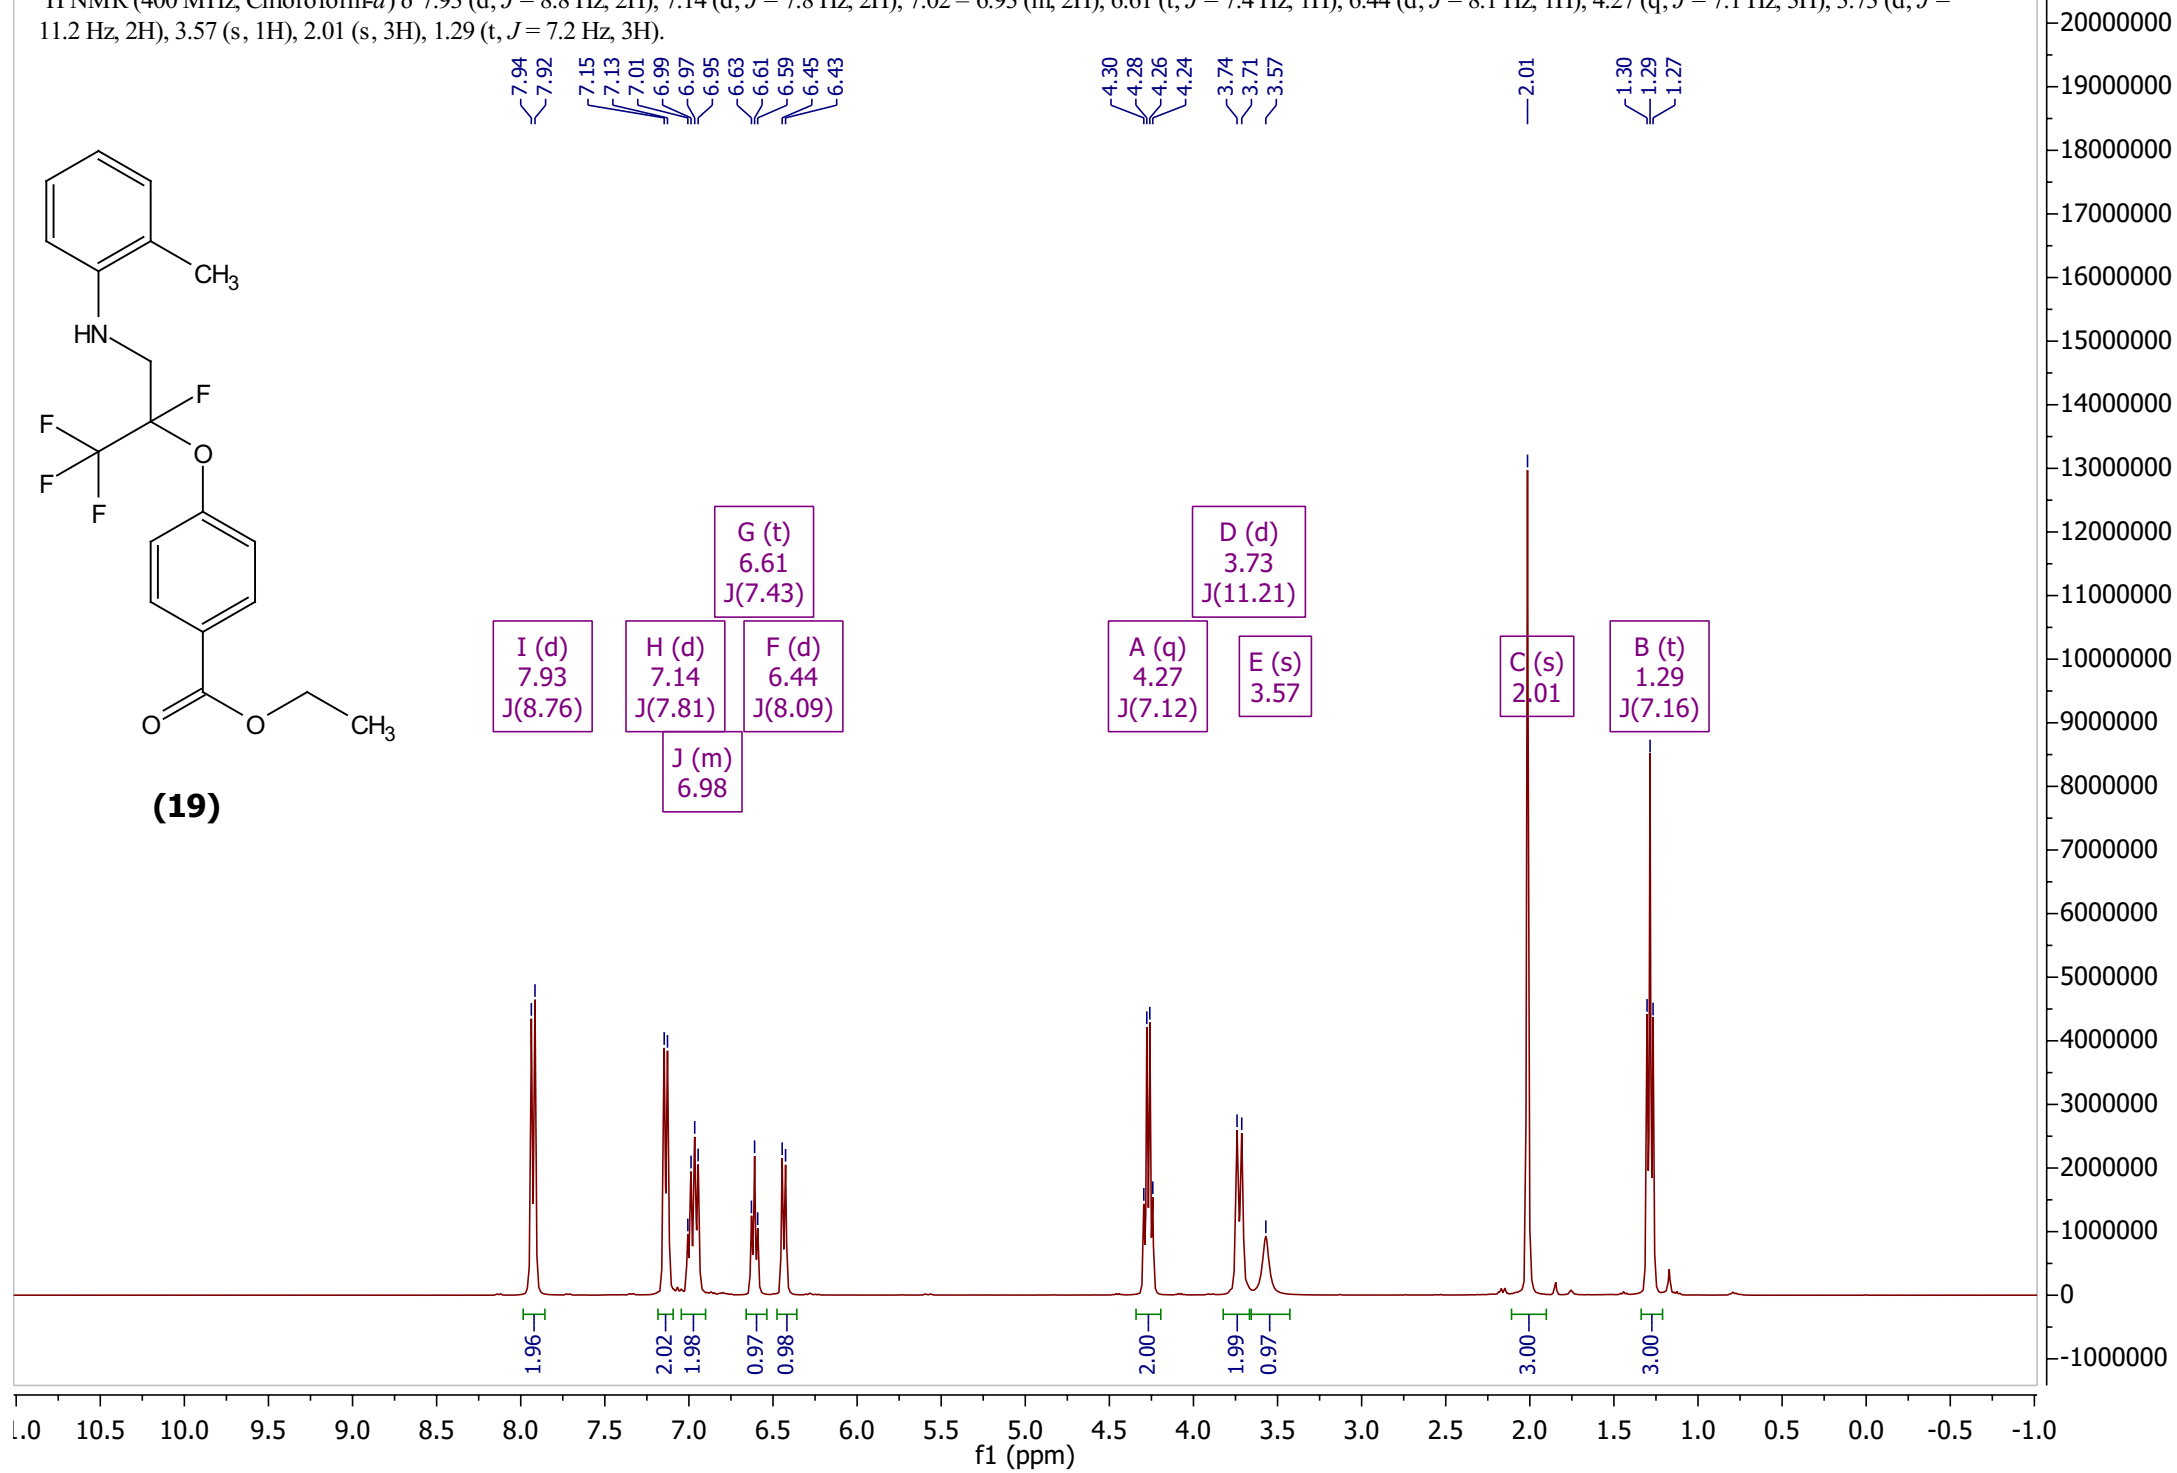

$^{19}\text{F}$  NMR (376 MHz, Chloroform-*d*)  $\delta$  -80.5 (d,  $J = 2.8$  Hz), -125.0 (q,  $J = 2.8$  Hz).

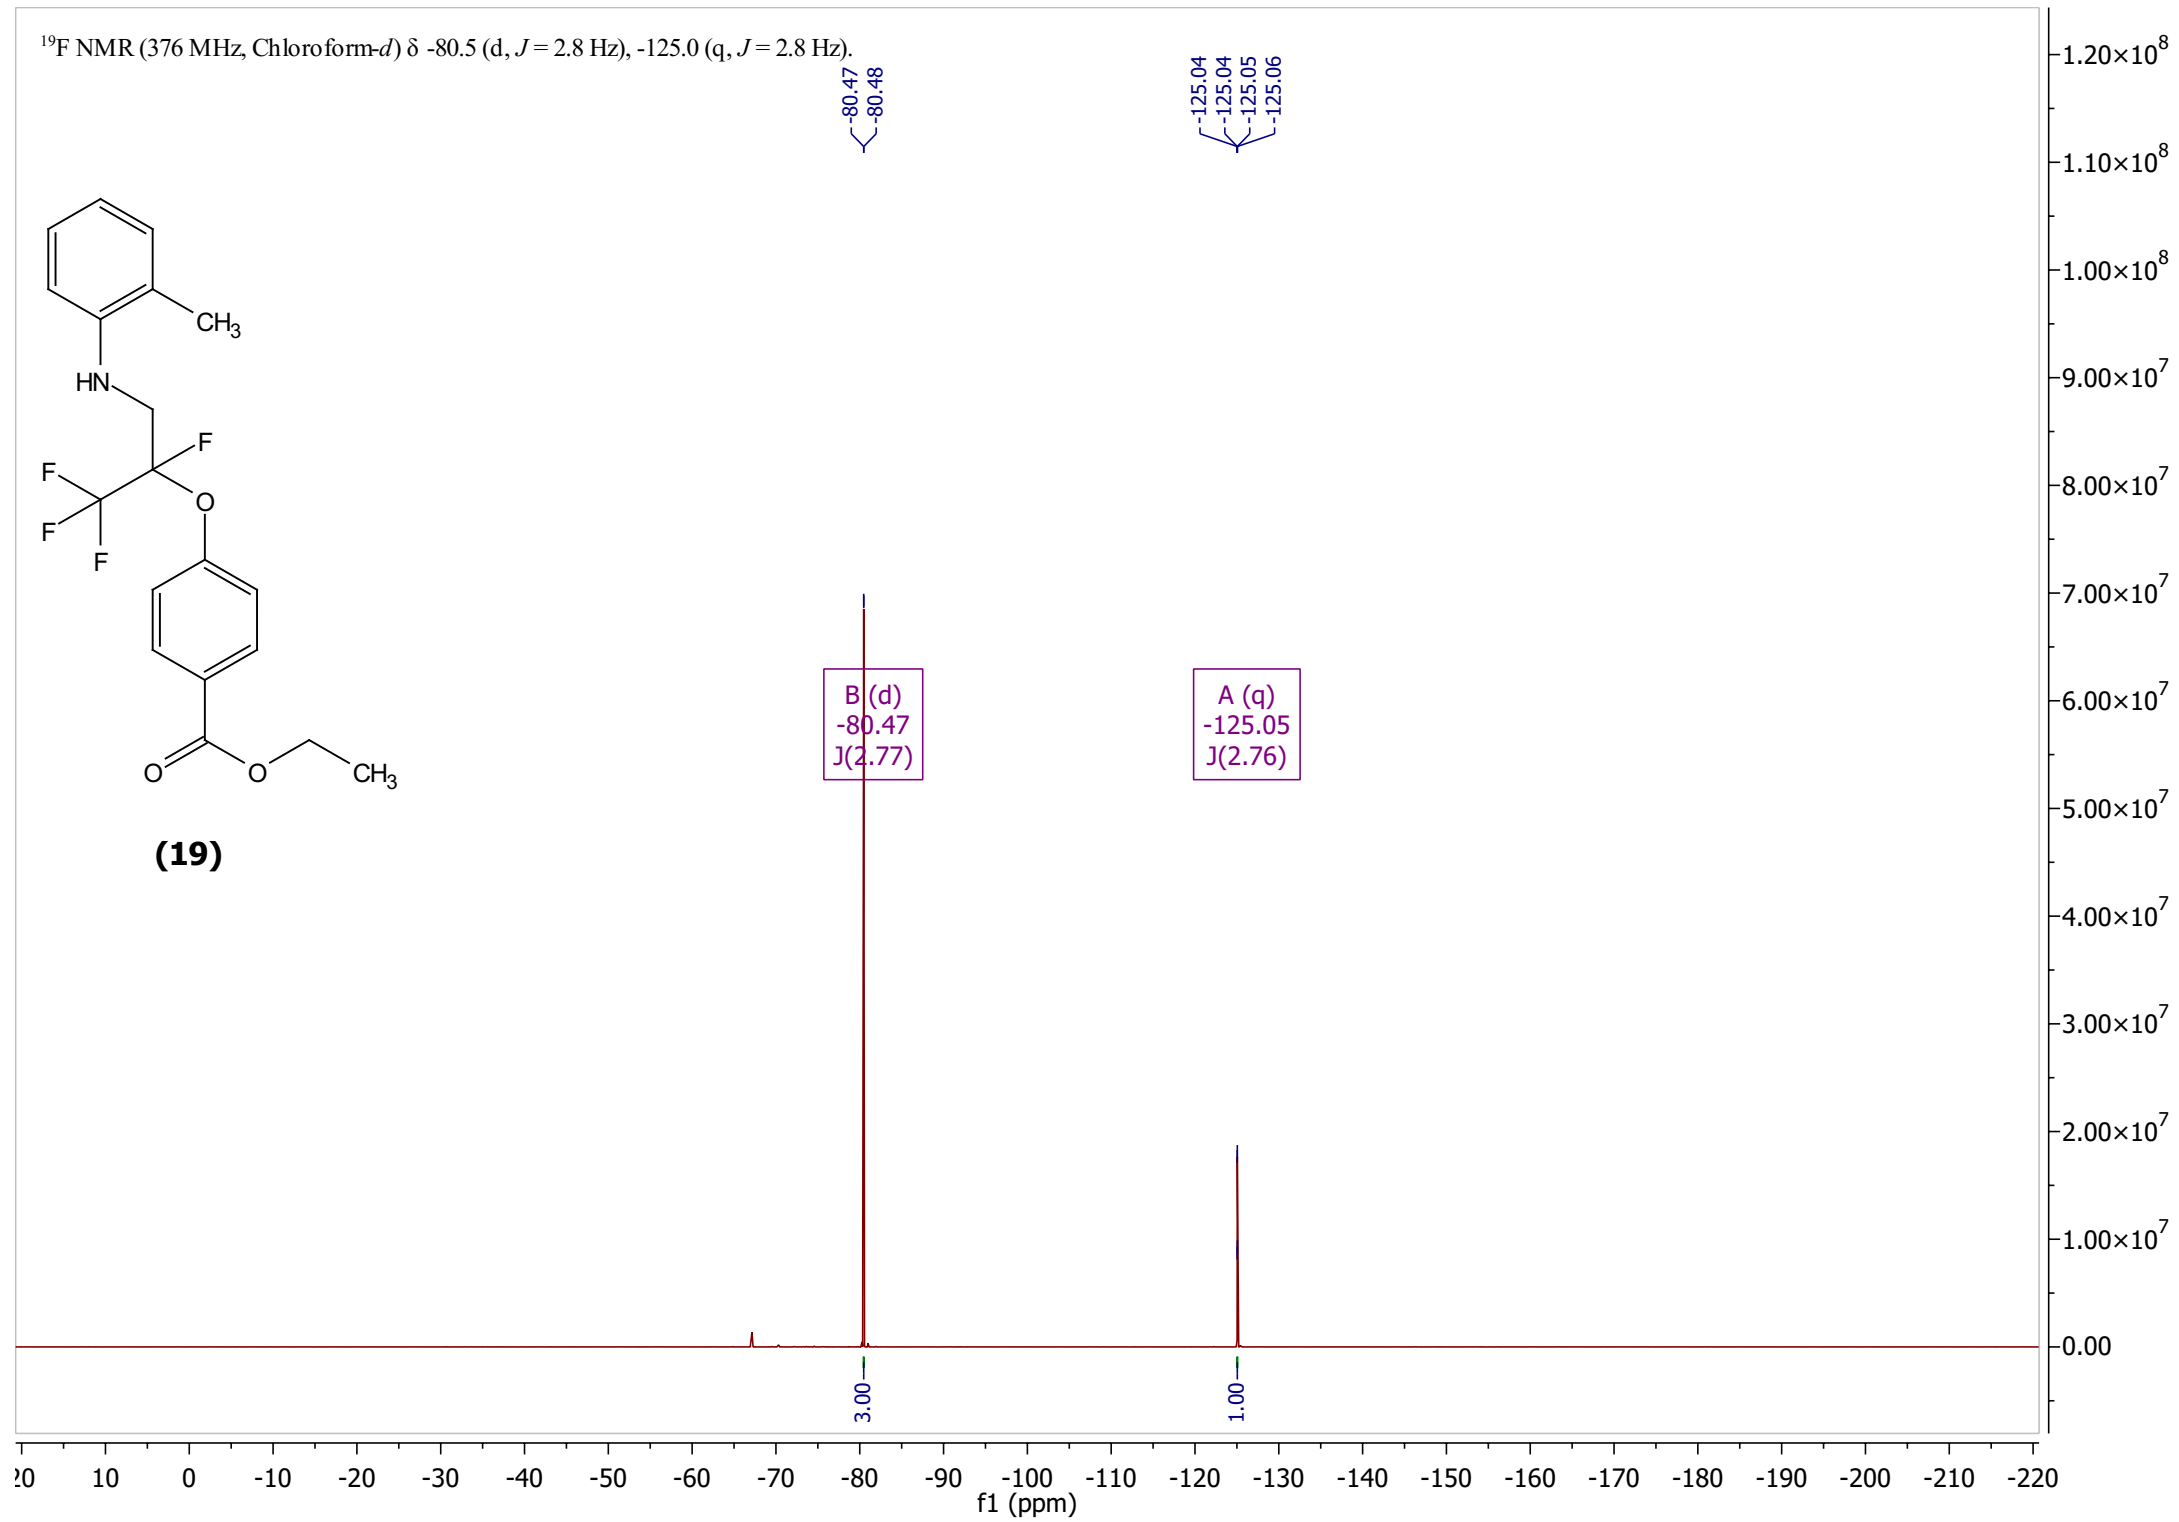

$^{13}\text{C}$  NMR (101 MHz, Chloroform-*d*)  $\delta$  165.7, 155.4, 144.5, 131.5, 130.5, 128.3, 127.2, 122.6, 121.8 (d,  $J = 2.4$  Hz), 120.6 (qd,  $J = 287.8, 37.2$  Hz), 118.5, 110.1, 108.9 (dq,  $J = 241.0, 33.2$  Hz), 61.3, 44.6 (d,  $J = 29.2$  Hz), 17.3, 14.4.

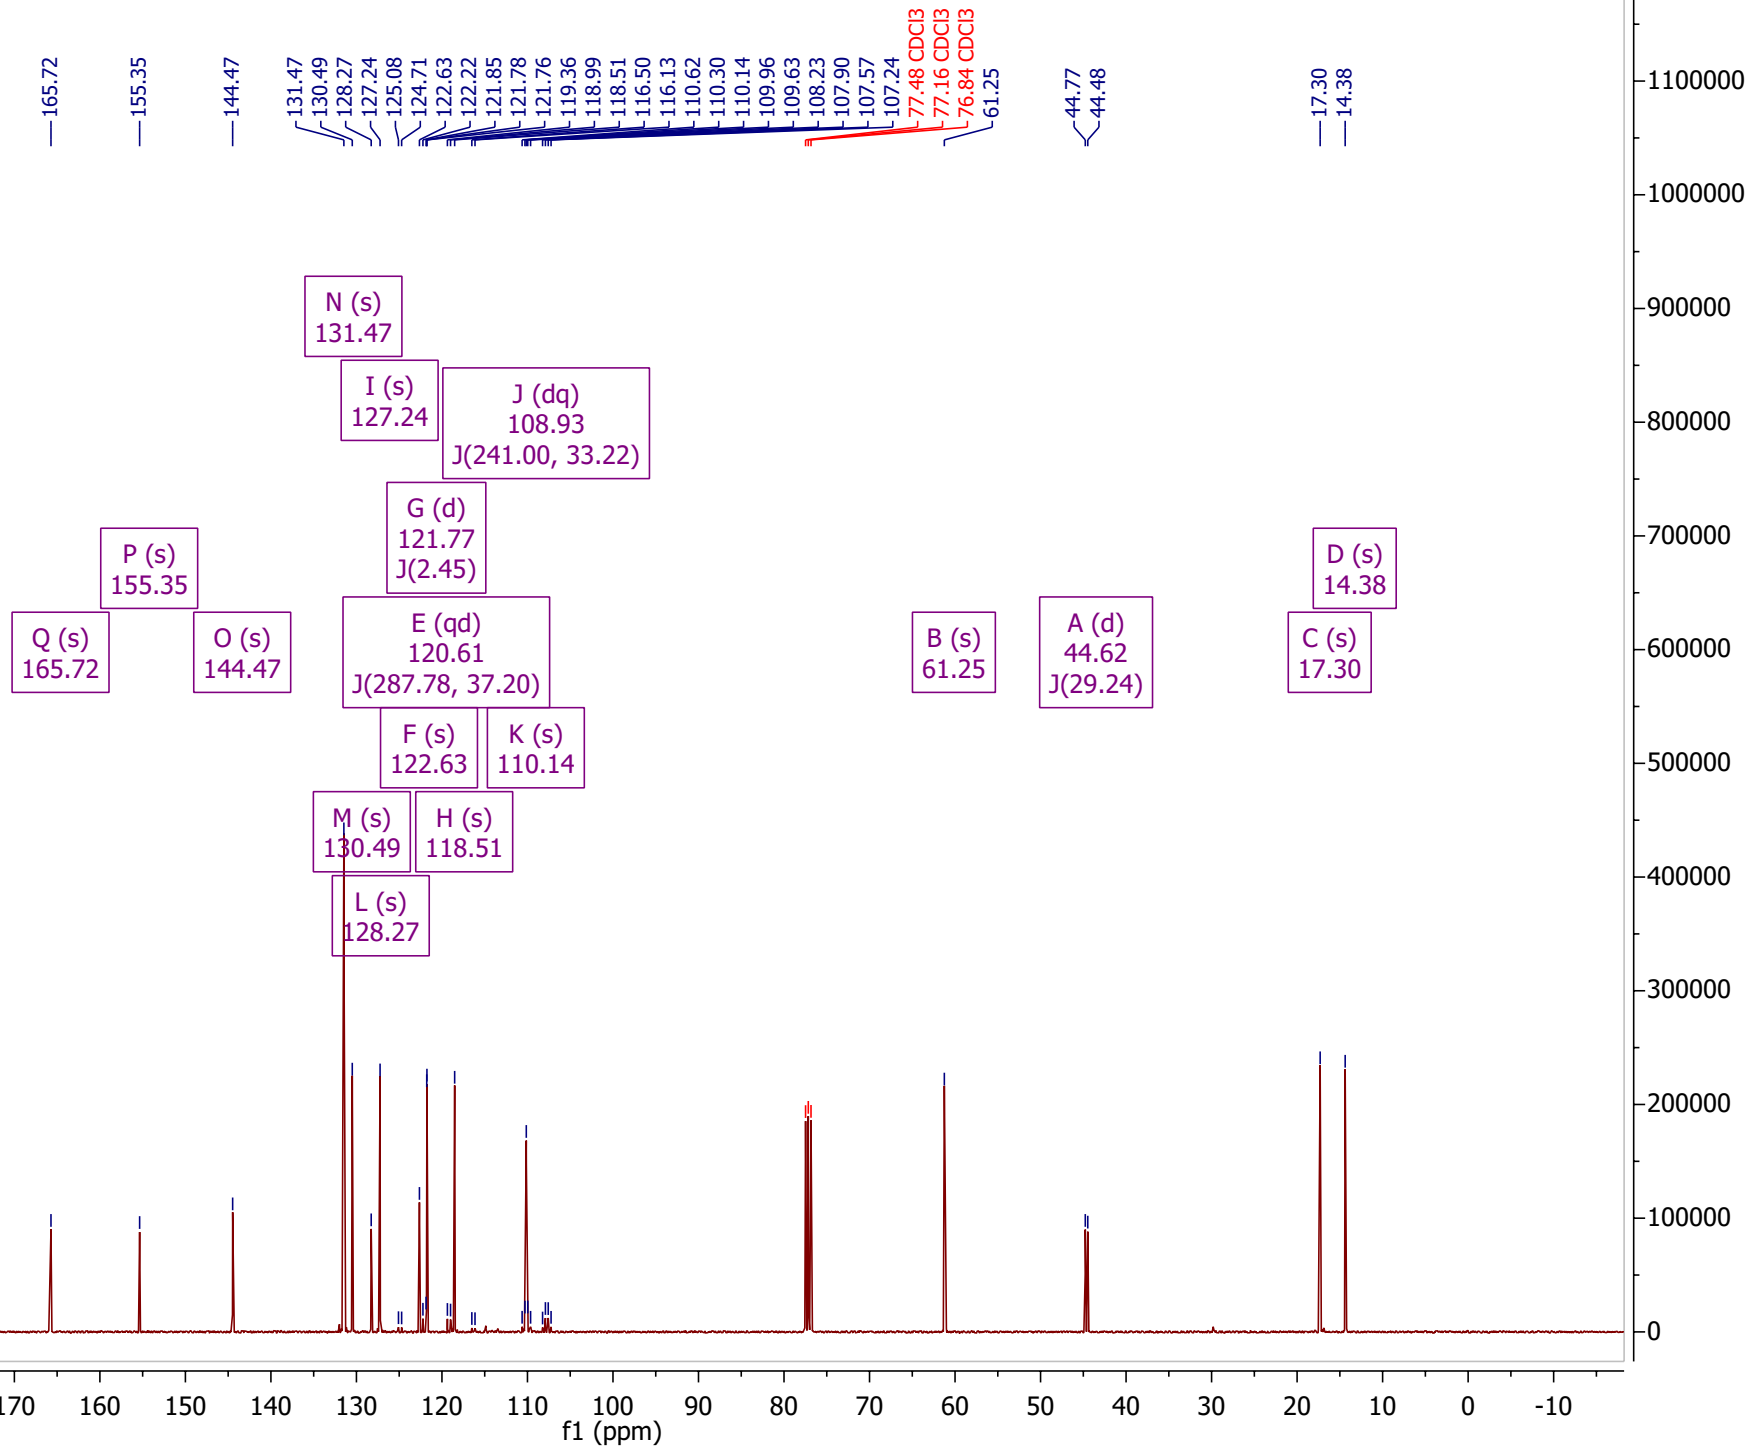

$^1\text{H}$  NMR (400 MHz, Chloroform-*d*)  $\delta$  7.89 (d,  $J = 8.5$  Hz, 2H), 7.55 (d,  $J = 8.2$  Hz, 1H), 7.50 (d,  $J = 8.8$  Hz, 1H), 7.45 (d,  $J = 8.3$  Hz, 1H), 7.25 (t,  $J = 7.6$  Hz, 1H), 7.14 – 7.05 (m, 3H), 6.72 (dd,  $J = 8.8, 2.5$  Hz, 1H), 6.63 (d,  $J = 2.6$  Hz, 1H), 4.23 (q,  $J = 7.1$  Hz, 2H), 3.90 (bs, 1H), 3.84 – 3.69 (m, 2H), 1.25 (t,  $J = 7.2$  Hz, 3H).

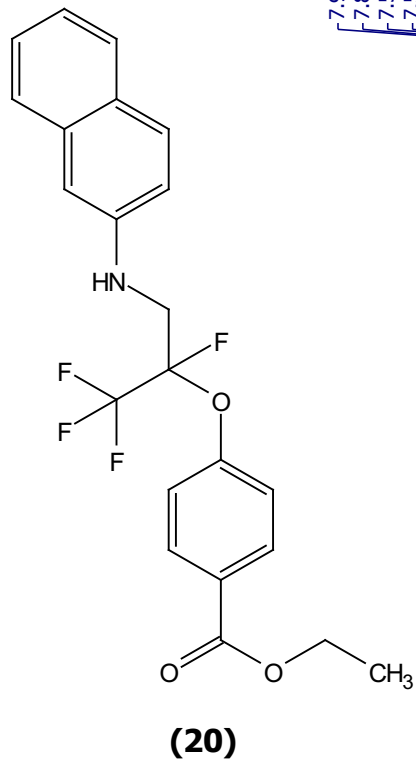

7.90  
7.88  
7.56  
7.54  
7.51  
7.49  
7.46  
7.44  
7.27  
7.25  
7.23  
7.13  
7.11  
7.09  
6.74  
6.73  
6.72  
6.71  
6.63  
6.63

4.26  
4.24  
4.22  
4.21  
3.90  
3.83  
3.79  
3.77  
3.74  
3.71

1.27  
1.25  
1.23

H (d)  
7.89  
J(8.45)

D (t)  
7.25  
J(7.56)

B (d)  
7.50  
J(8.81)

F (d)  
6.63  
J(2.61)

A (d)  
7.55  
J(8.17)

E (dd)  
6.72  
J(8.76, 2.46)

C (d)  
7.45  
J(8.27)

G (m)  
7.12

K (m)  
3.76

I (q)  
4.23  
J(7.14)

J (s)  
3.90

L (t)  
1.25  
J(7.17)

2.00  
1.00  
1.01  
1.03  
1.04  
3.04

2.05  
3.01

3.03

10.5 10.0 9.5 9.0 8.5 8.0 7.5 7.0 6.5 6.0 5.5 5.0 4.5 4.0 3.5 3.0 2.5 2.0 1.5 1.0 0.5 0.0 -0.5 -1.0  
f1 (ppm)

11000000  
10000000  
9000000  
8000000  
7000000  
6000000  
5000000  
4000000  
3000000  
2000000  
1000000  
0

$^{19}\text{F}$  NMR (376 MHz, Chloroform-*d*)  $\delta$  -80.2 (d,  $J = 2.8$  Hz), -125.2 (q,  $J = 2.7$  Hz).

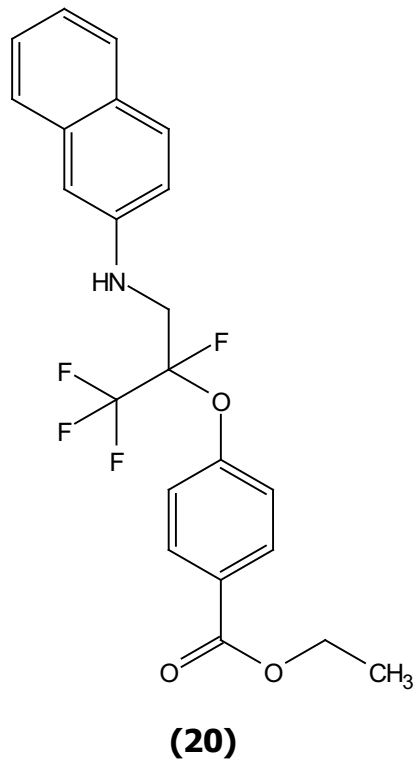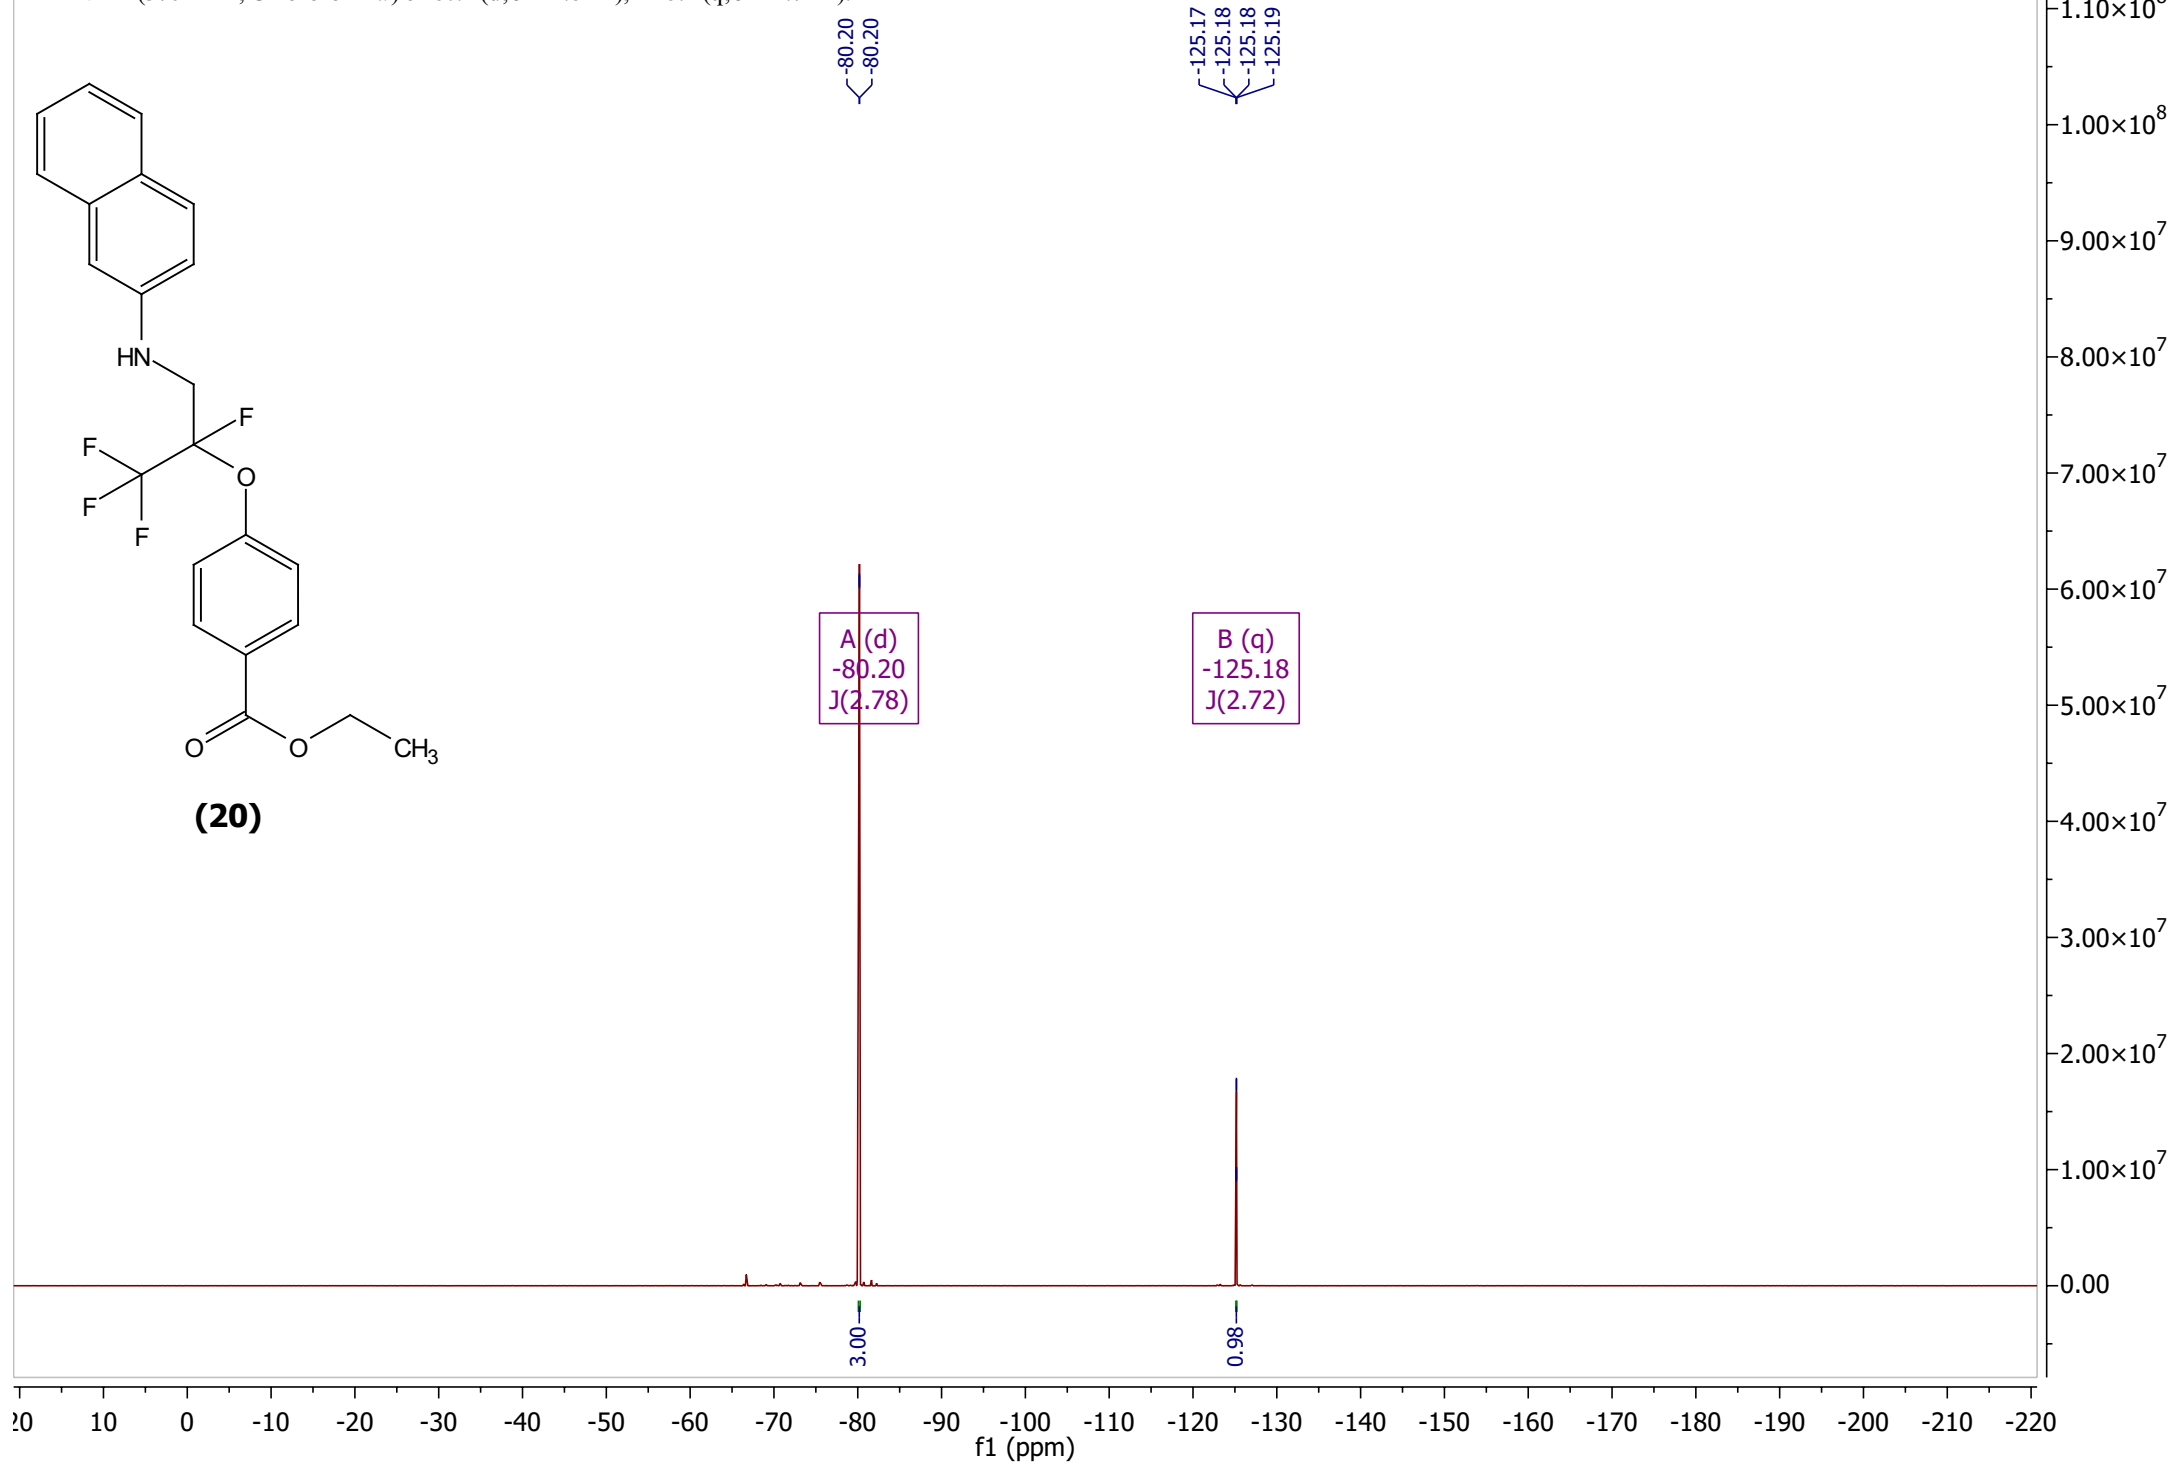

$^{13}\text{C}$  NMR (101 MHz, Chloroform-*d*)  $\delta$  165.7, 155.4, 144.2, 134.9, 131.4, 129.3, 128.2, 128.2, 127.7, 126.6, 126.2, 122.8, 121.8 (d,  $J = 2.5$  Hz), 120.6 (qd,  $J = 287.6, 37.5$  Hz), 117.6, 108.9 (dq,  $J = 241.1, 33.3$  Hz), 105.6, 61.2, 44.9 (d,  $J = 29.0$  Hz), 14.4.

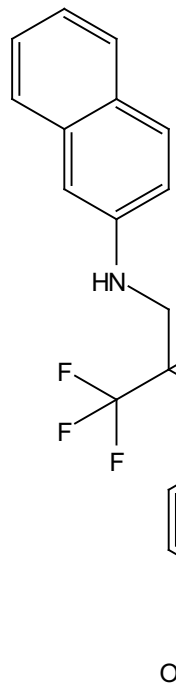

**(20)**

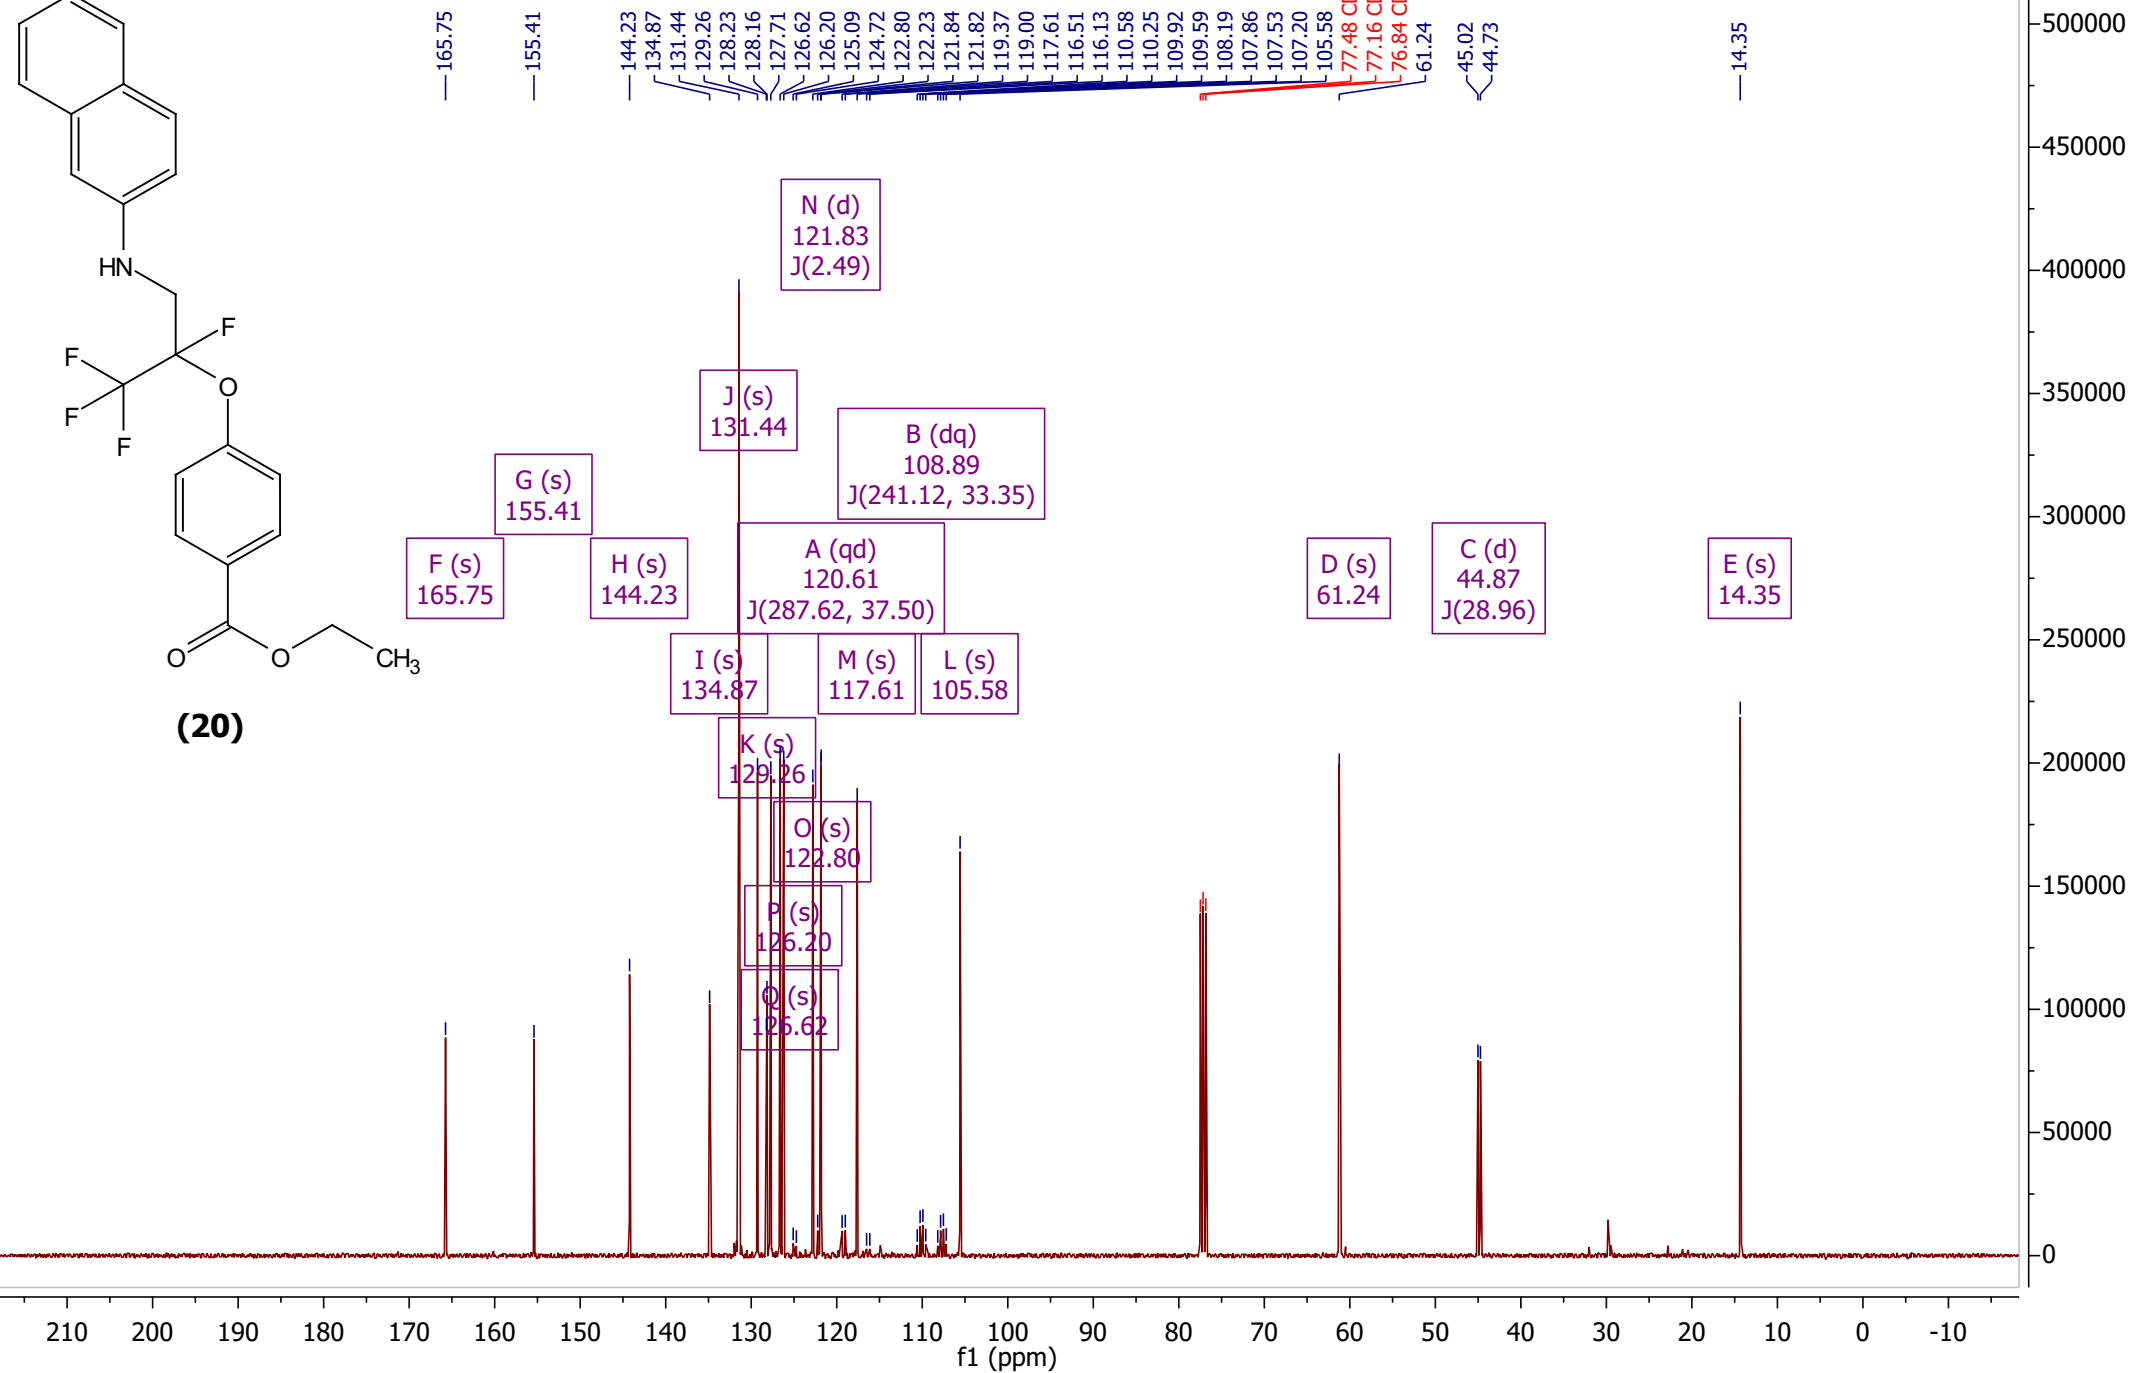



$^1\text{H NMR}$  (400 MHz, Chloroform-*d*)  $\delta$  7.23 (t,  $J = 7.8$  Hz, 2H), 7.15 – 7.02 (m, 5H), 6.66 (t,  $J = 7.4$  Hz, 1H), 6.48 (d,  $J = 7.9$  Hz, 2H), 3.81 – 3.56 (m, 3H).

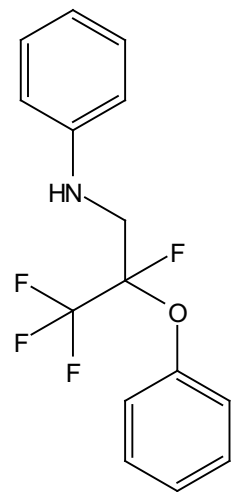

**(21)**

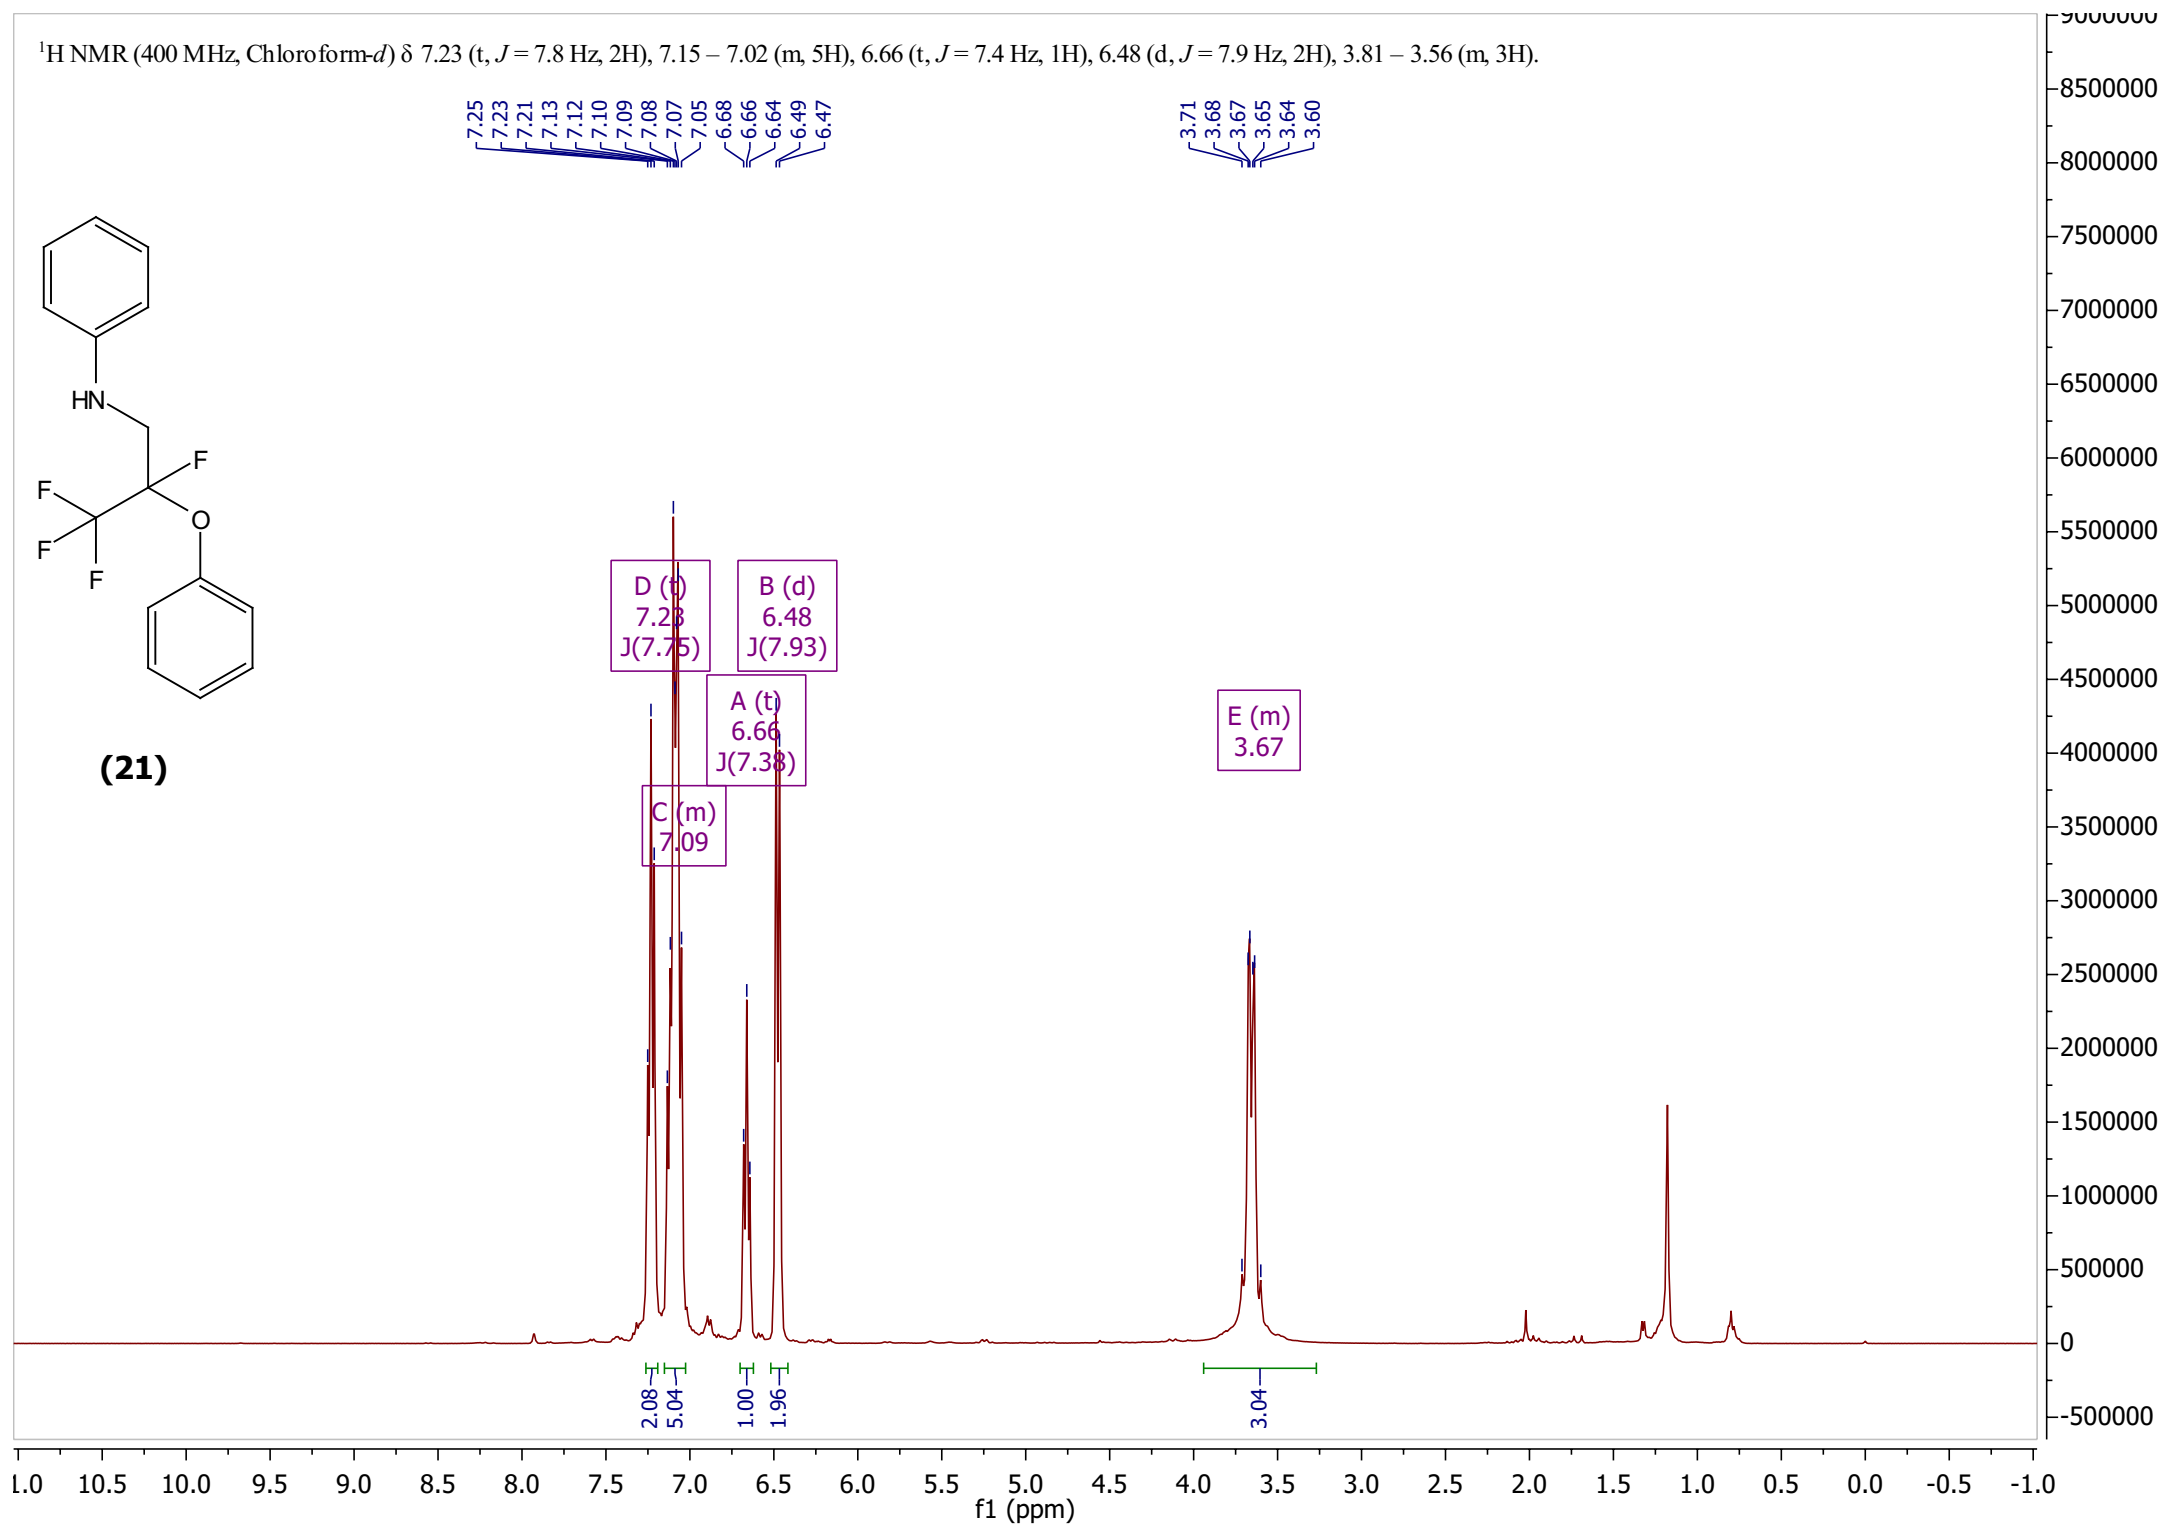

$^{19}\text{F}$  NMR (376 MHz, Chloroform-*d*)  $\delta$  -80.3 (d,  $J = 2.8$  Hz), -124.7 (q,  $J = 2.8$  Hz).

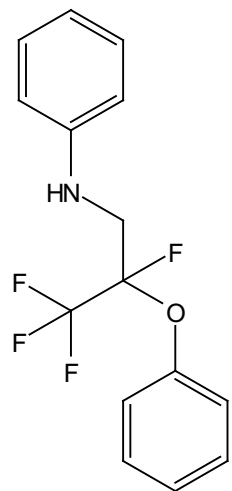

**(21)**

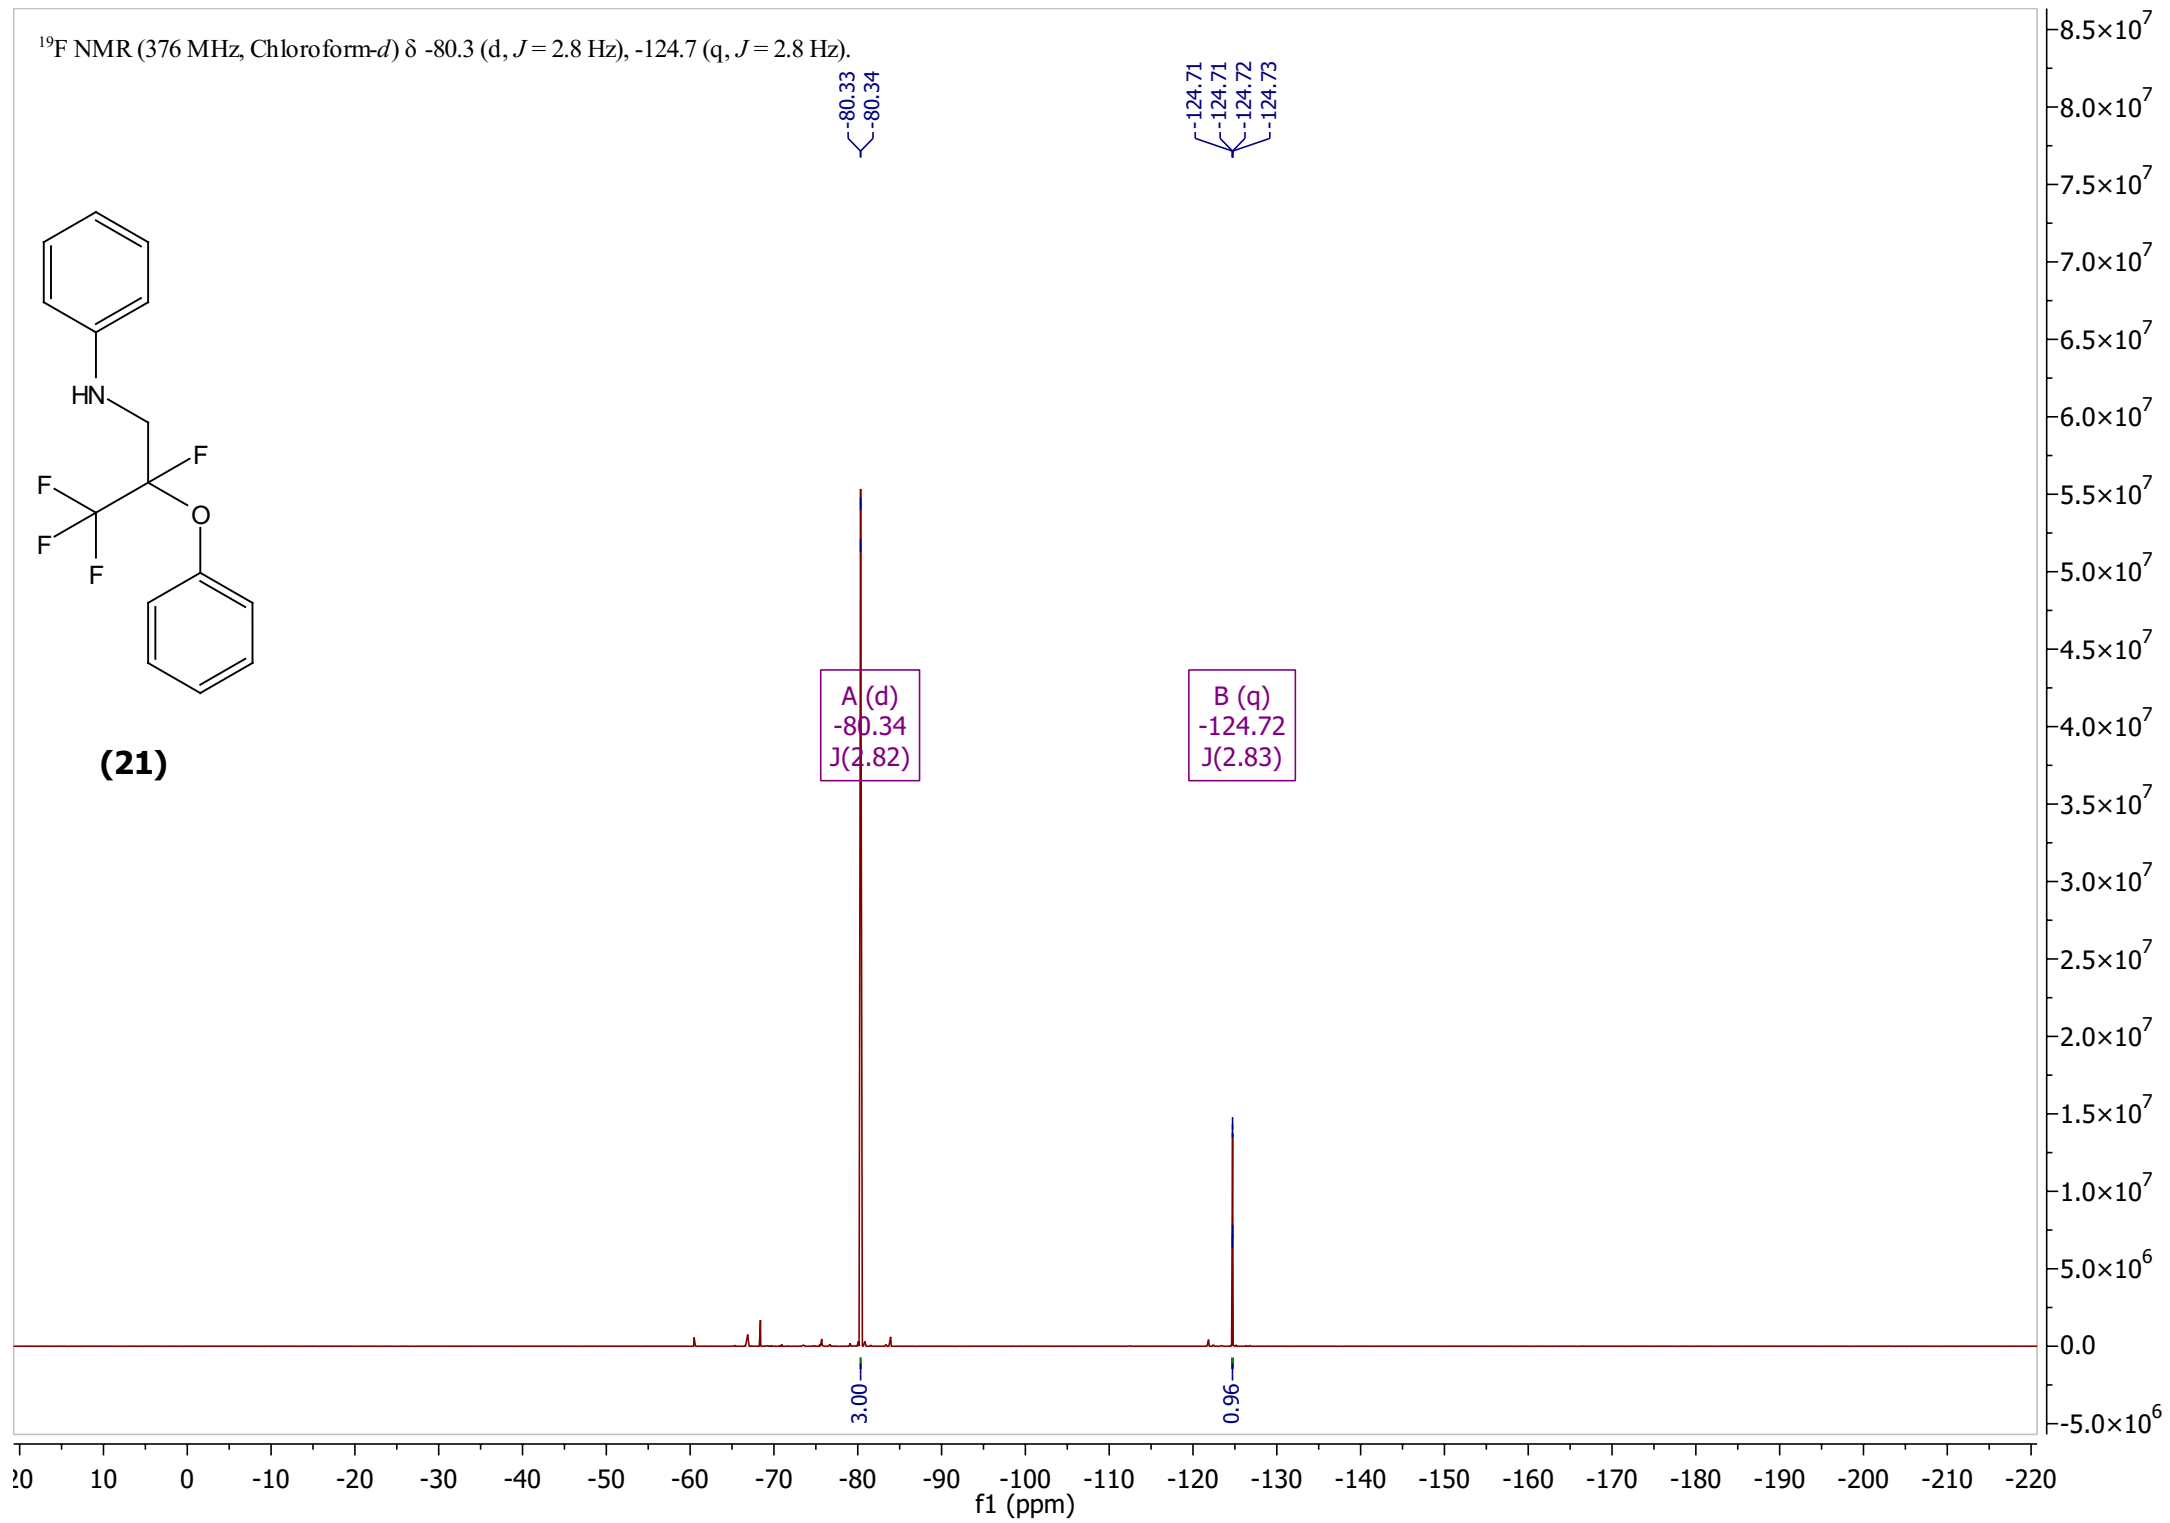

$^{13}\text{C}$  NMR (101 MHz, Chloroform-*d*)  $\delta$  151.7, 146.8, 129.8, 129.4, 126.1, 122.3 (d,  $J = 2.1$  Hz), 120.7 (qd,  $J = 287.9, 37.7$  Hz), 118.8, 113.3, 108.7 (dq,  $J = 239.1, 32.9$  Hz), 44.9 (d,  $J = 29.6$  Hz).

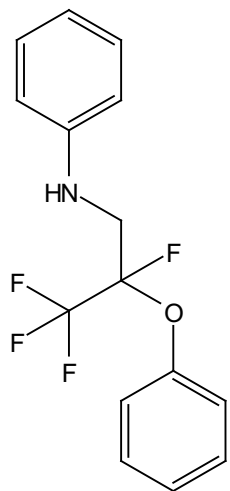

**(21)**

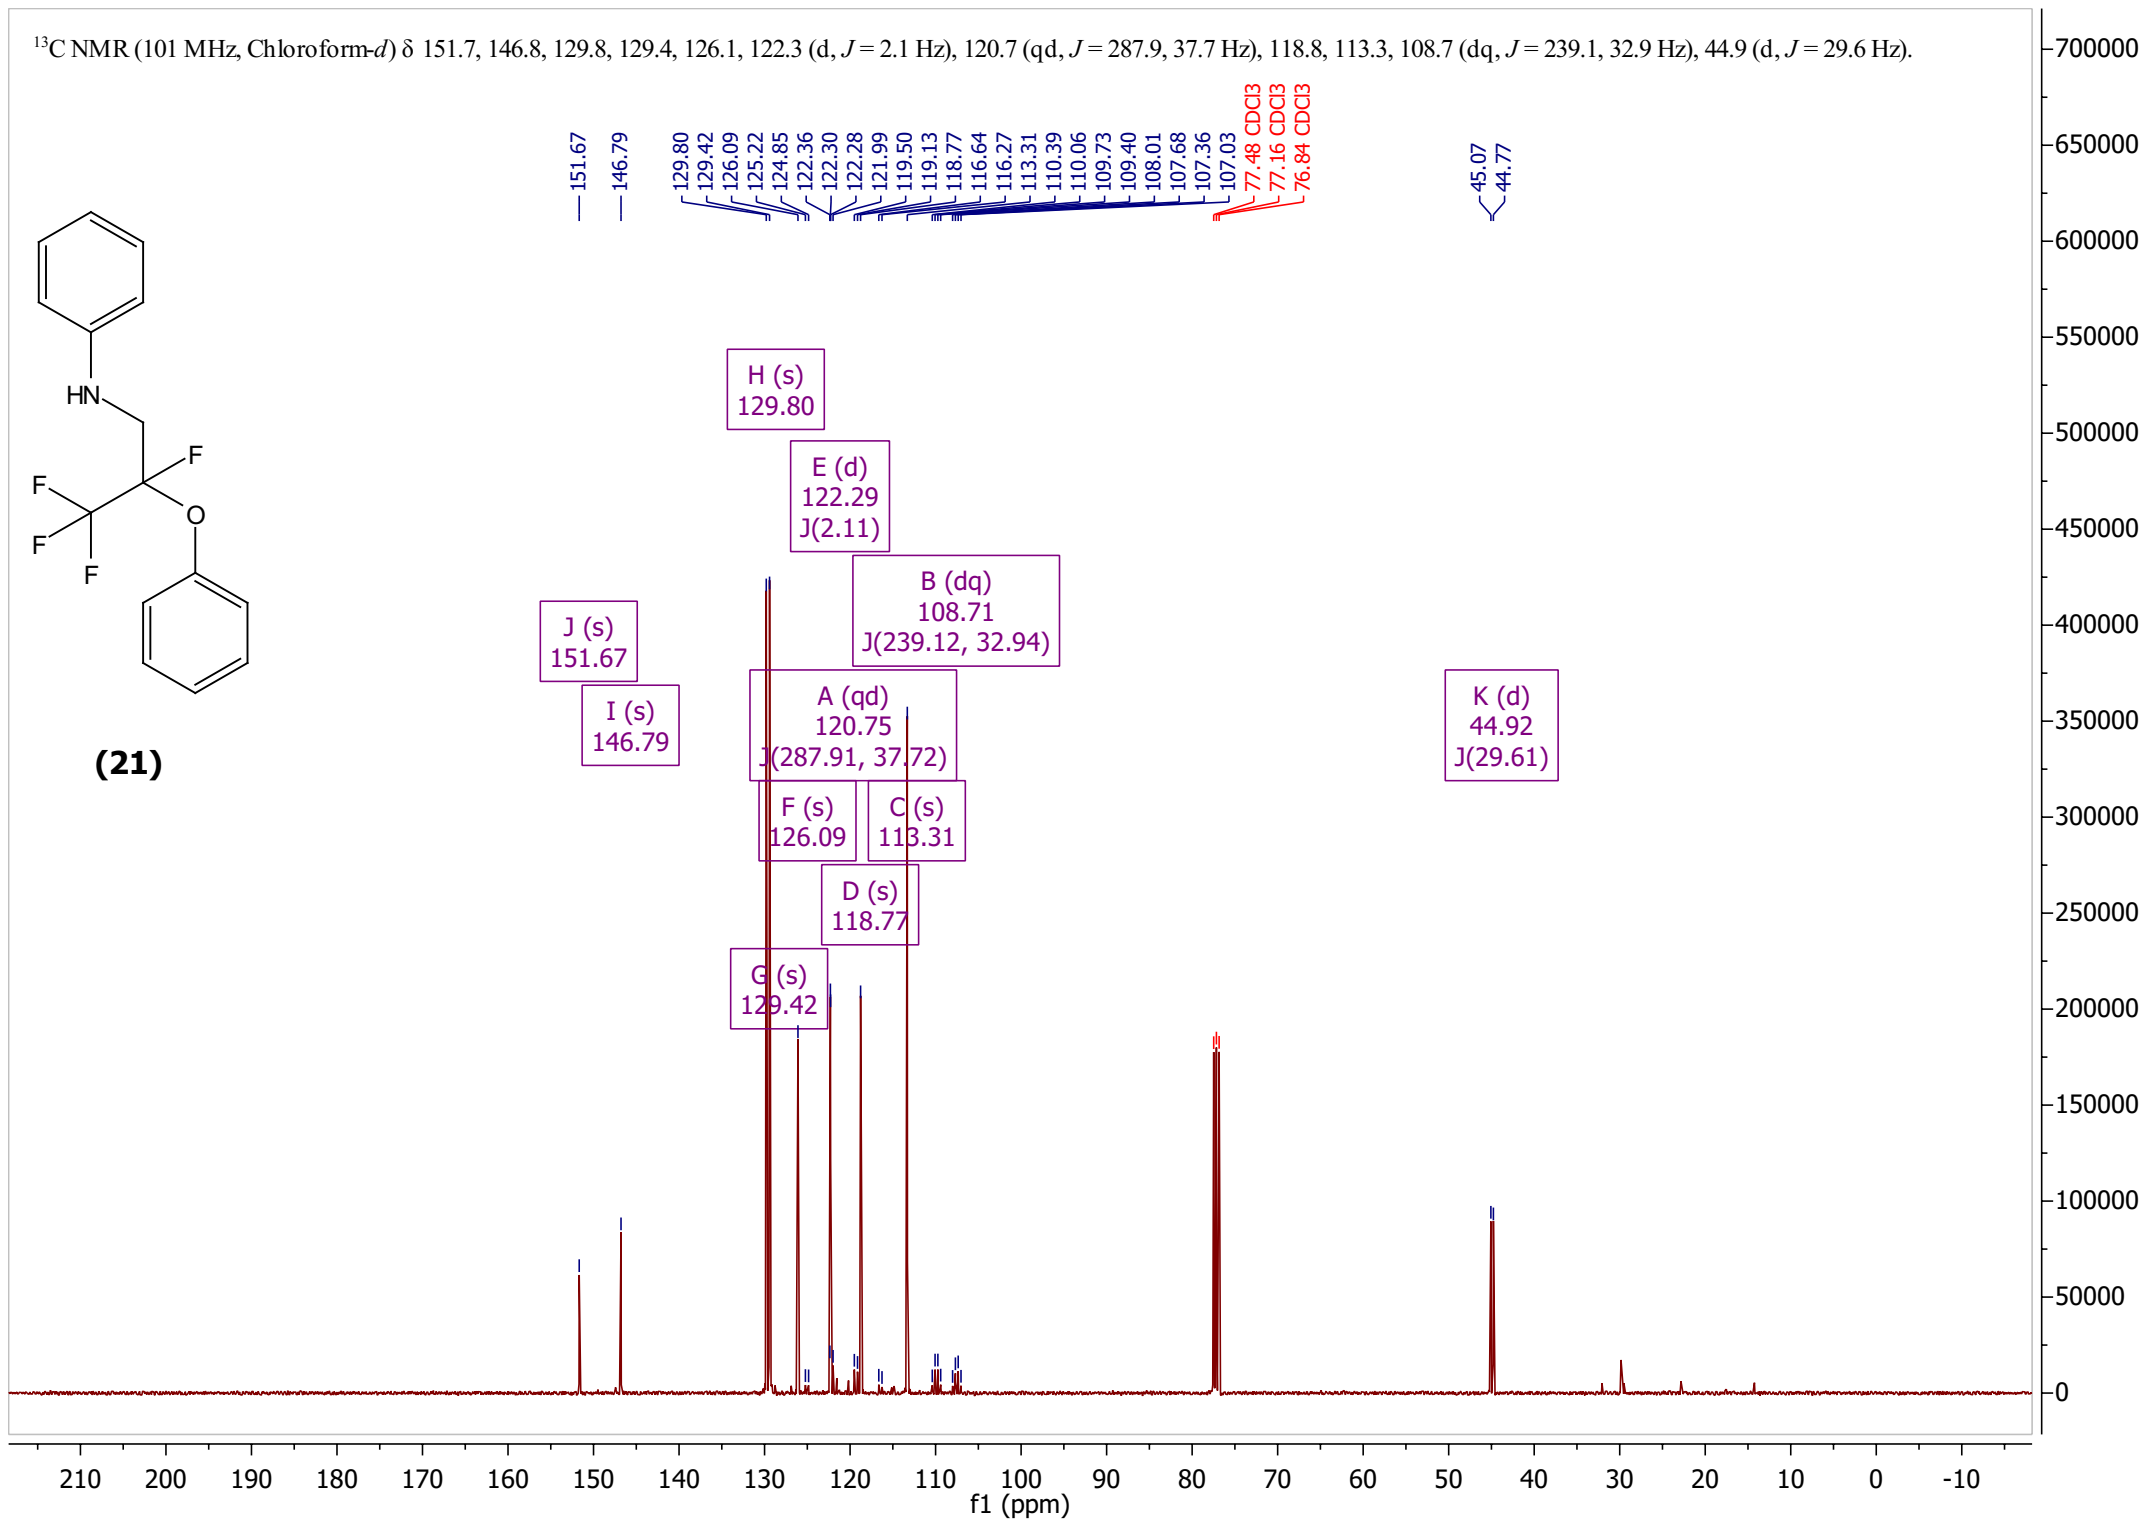

$^1\text{H}$  NMR (400 MHz, Chloroform-*d*)  $\delta$  7.32 (d,  $J$  = 8.8 Hz, 2H), 7.24 (t,  $J$  = 7.9 Hz, 2H), 7.16 – 7.11 (m, 1H), 7.07 (d,  $J$  = 8.4 Hz, 2H), 6.26 (d,  $J$  = 8.8 Hz, 2H), 3.78 – 3.54 (m, 3H).

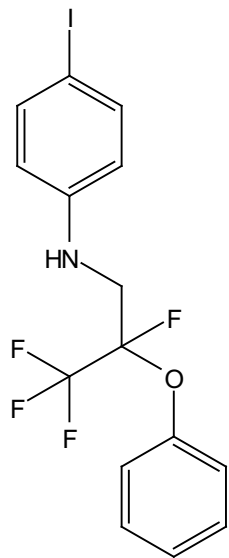

**(22)**

7.33  
7.31  
7.26  
7.24  
7.22  
7.15  
7.15  
7.14  
7.13  
7.13  
7.12  
7.11  
7.11  
7.08  
7.06  
6.27  
6.25

3.71  
3.69  
3.65  
3.64  
3.62  
3.61  
3.57

C (m)  
7.14

B (t)  
7.24  
J(7.90)

A (d)  
7.32  
J(8.82)

D (d)  
7.07  
J(8.43)

E (d)  
6.26  
J(8.83)

F (m)  
3.66

2.01

2.00

1.02

2.00

2.00

3.03

1.0 10.5 10.0 9.5 9.0 8.5 8.0 7.5 7.0 6.5 6.0 5.5 5.0 4.5 4.0 3.5 3.0 2.5 2.0 1.5 1.0 0.5 0.0 -0.5 -1.0

f1 (ppm)

14000000  
13000000  
12000000  
11000000  
10000000  
9000000  
8000000  
7000000  
6000000  
5000000  
4000000  
3000000  
2000000  
1000000  
0  
-1000000

$^{19}\text{F}$  NMR (376 MHz, Chloroform-*d*)  $\delta$  -80.3 (d,  $J = 3.1$  Hz), -124.8 (q,  $J = 2.8$  Hz).

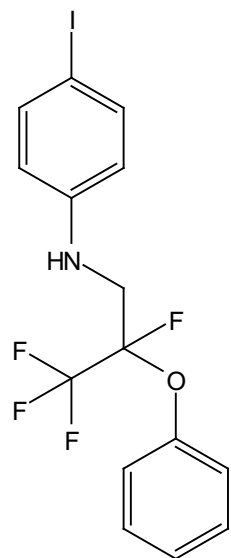

**(22)**

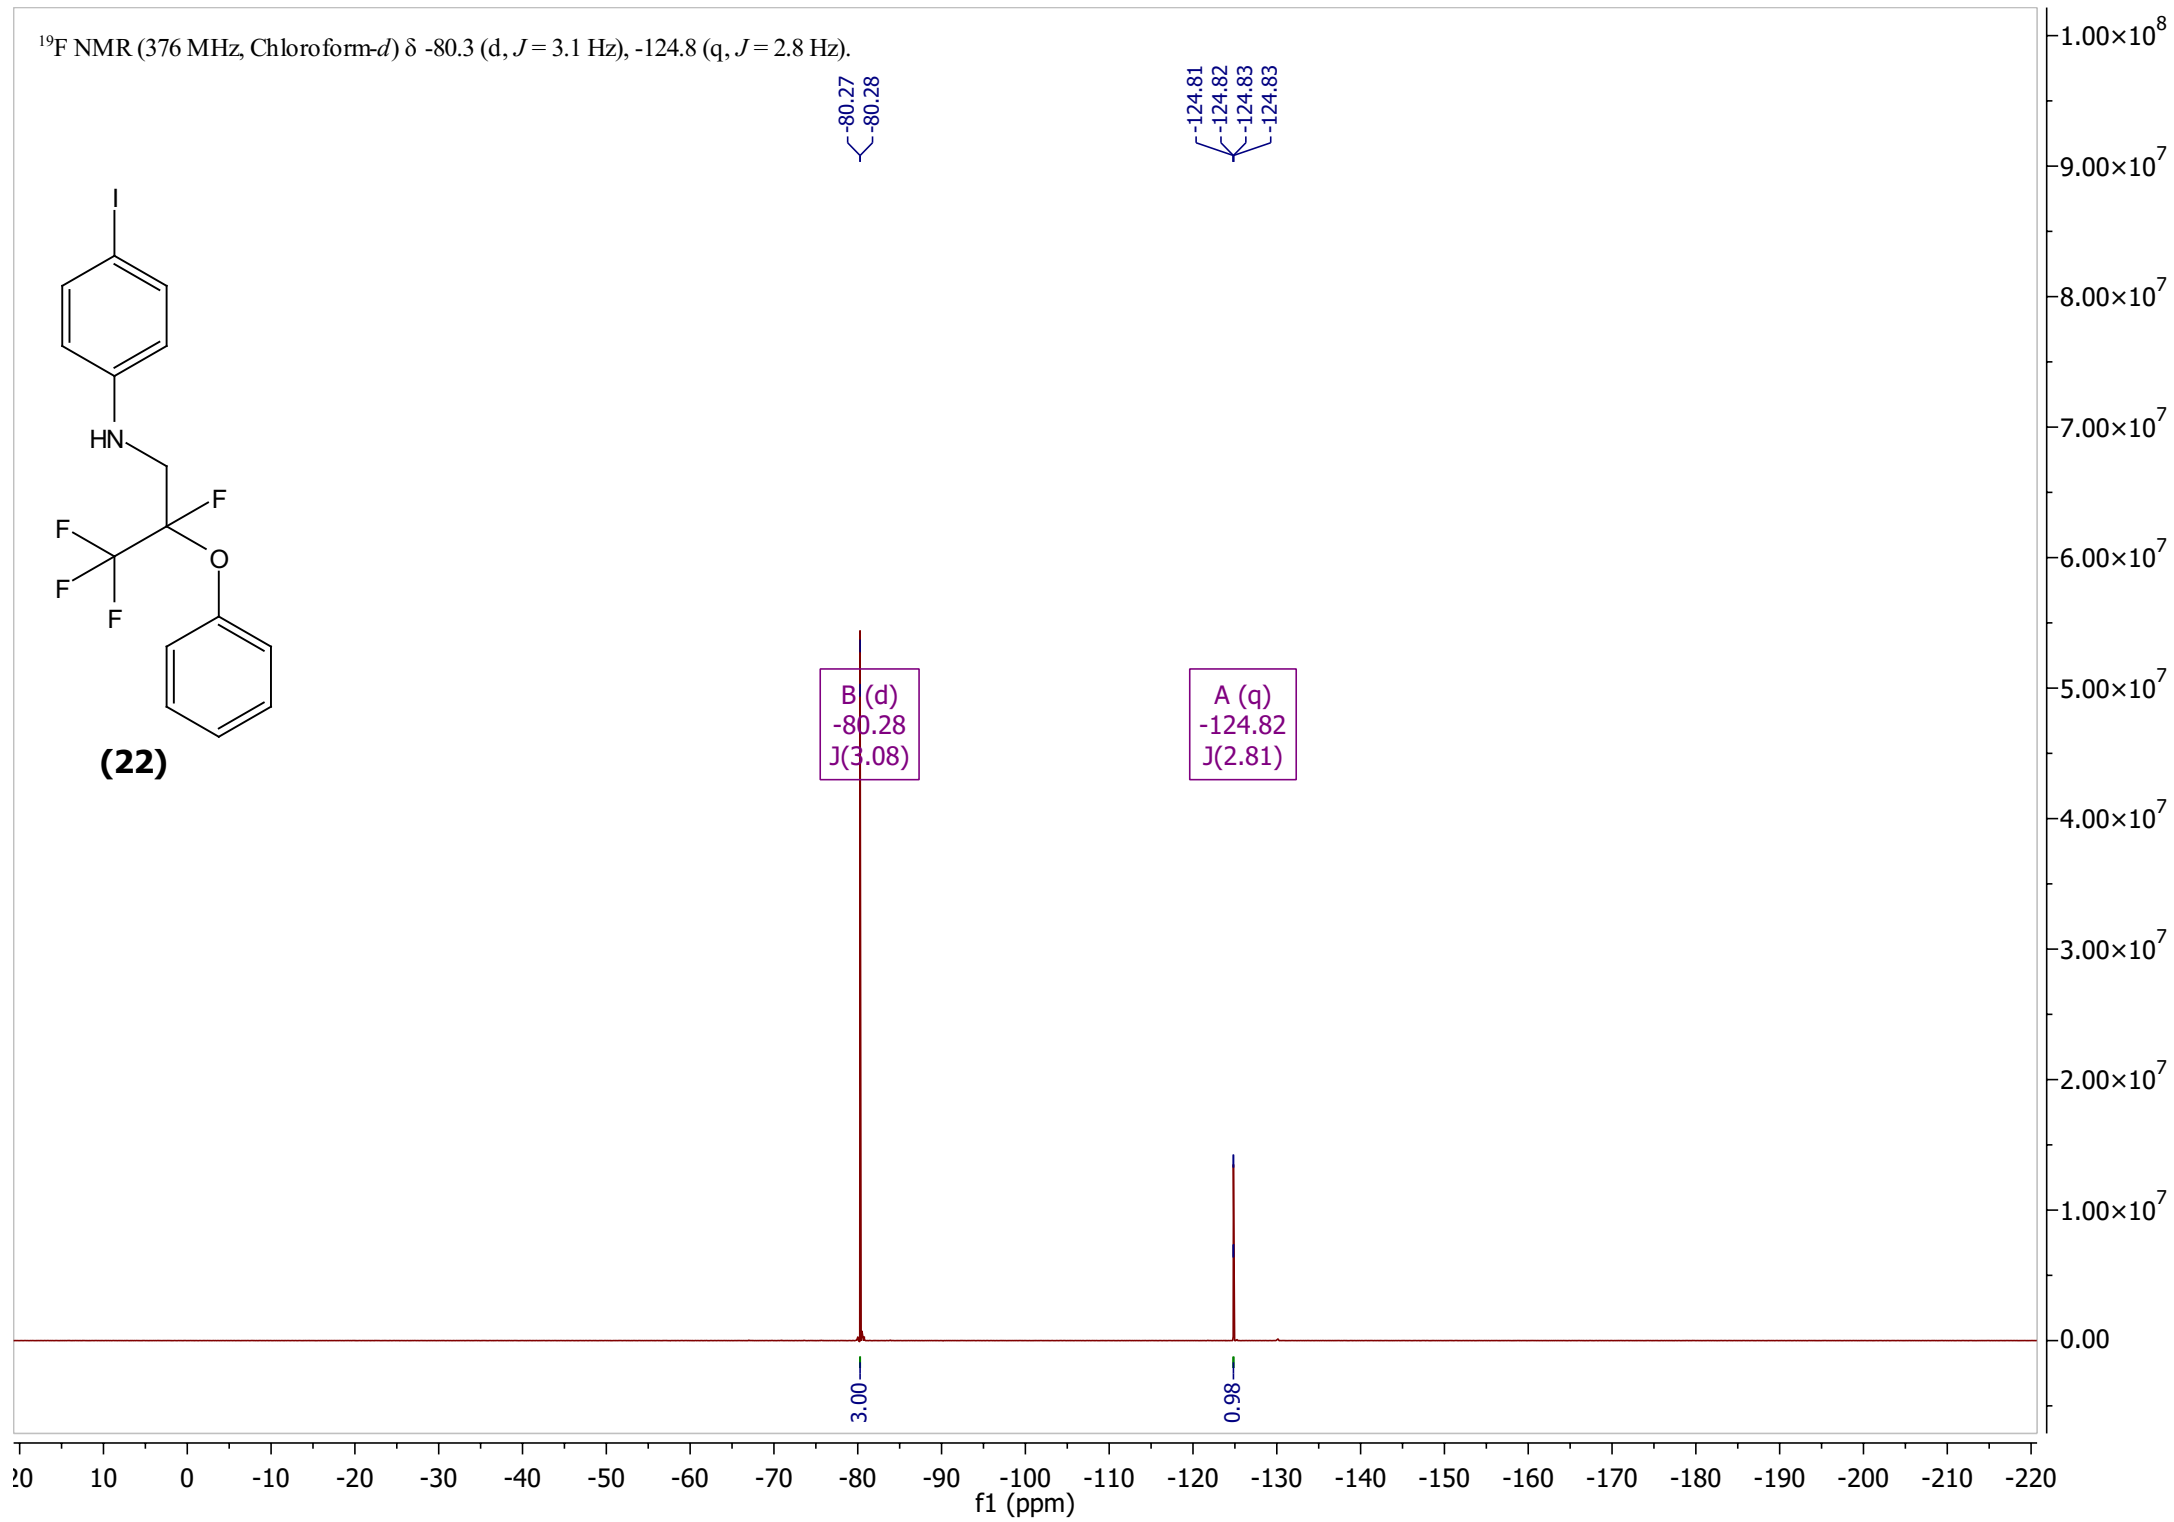

$^{13}\text{C}$  NMR (101 MHz, Chloroform-*d*)  $\delta$  151.6, 146.4, 138.0, 129.8, 126.2, 122.2 (d,  $J = 2.1$  Hz), 120.6 (dd,  $J = 287.5, 37.9$  Hz), 115.4, 108.5 (dq,  $J = 239.5, 33.1$  Hz), 79.6, 44.7 (d,  $J = 29.3$  Hz).

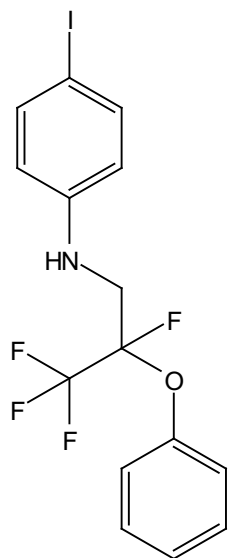

**(22)**

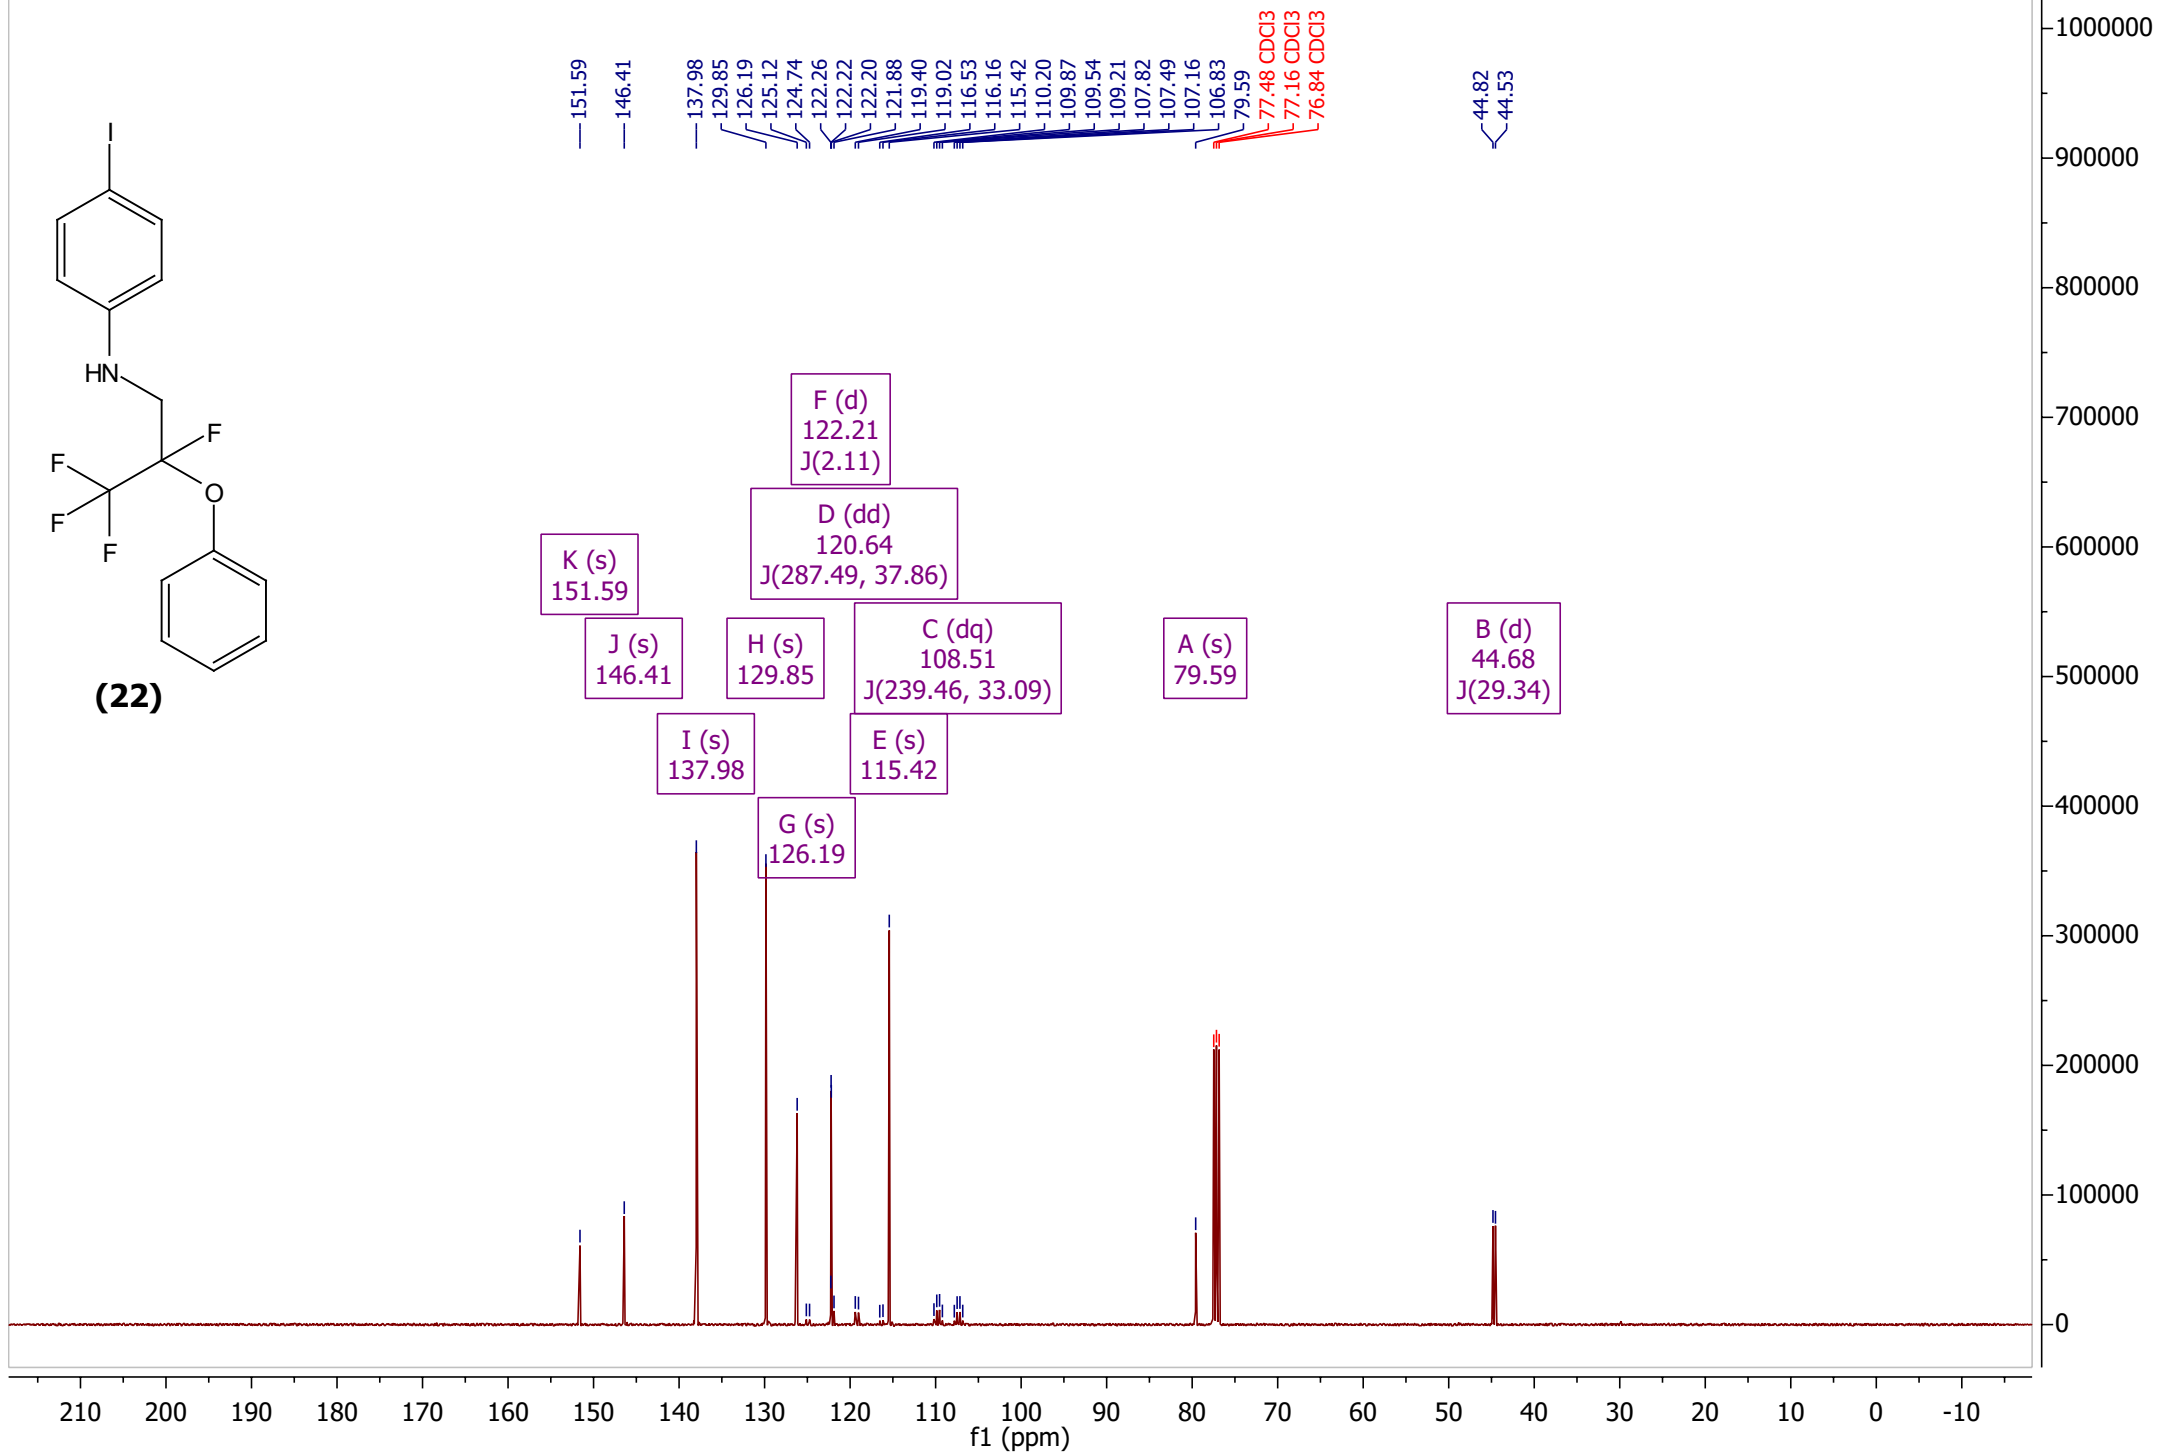

$^1\text{H NMR}$  (400 MHz, Chloroform-*d*)  $\delta$  7.65 (d,  $J = 8.8$  Hz, 2H), 7.21 (t,  $J = 8.0$  Hz, 2H), 6.96 (d,  $J = 8.2$  Hz, 2H), 6.81 (t,  $J = 7.3$  Hz, 1H), 6.62 (d,  $J = 7.9$  Hz, 2H), 3.88 – 3.71 (m, 3H).

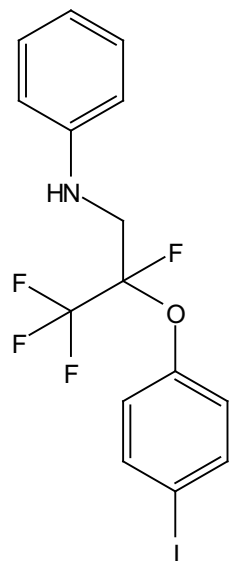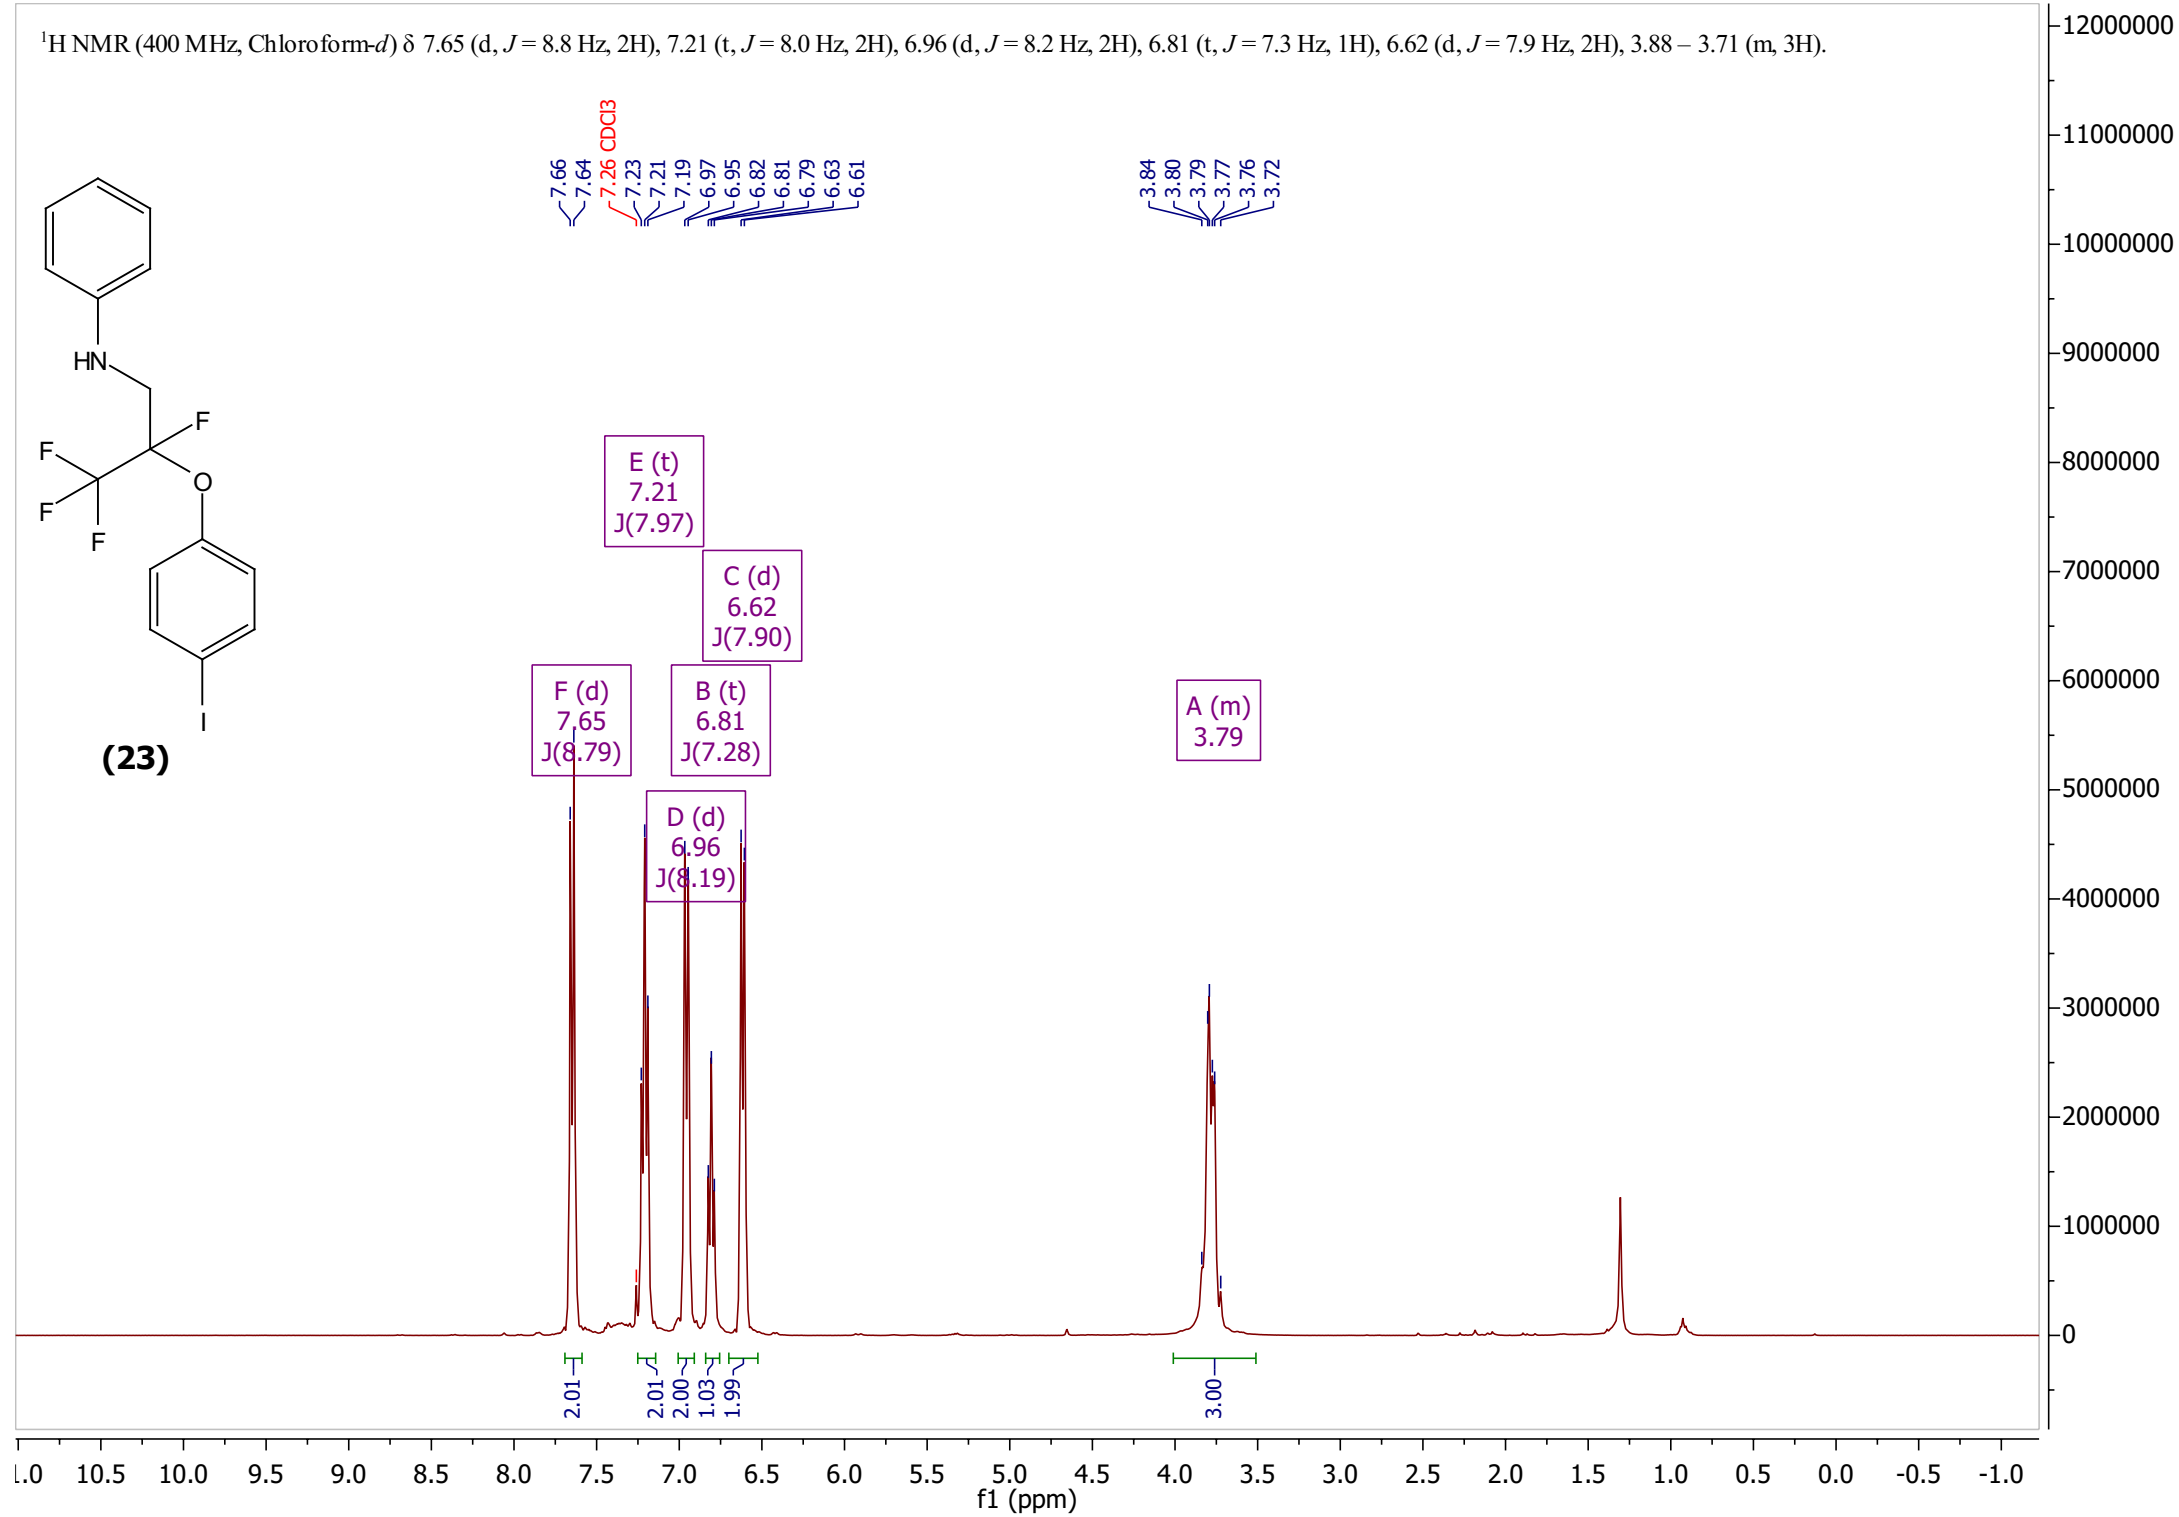

$^{19}\text{F}$  NMR (376 MHz, Chloroform-*d*)  $\delta$  -80.0 (d,  $J = 3.0$  Hz), -125.7 (q,  $J = 2.9$  Hz).



**(23)**

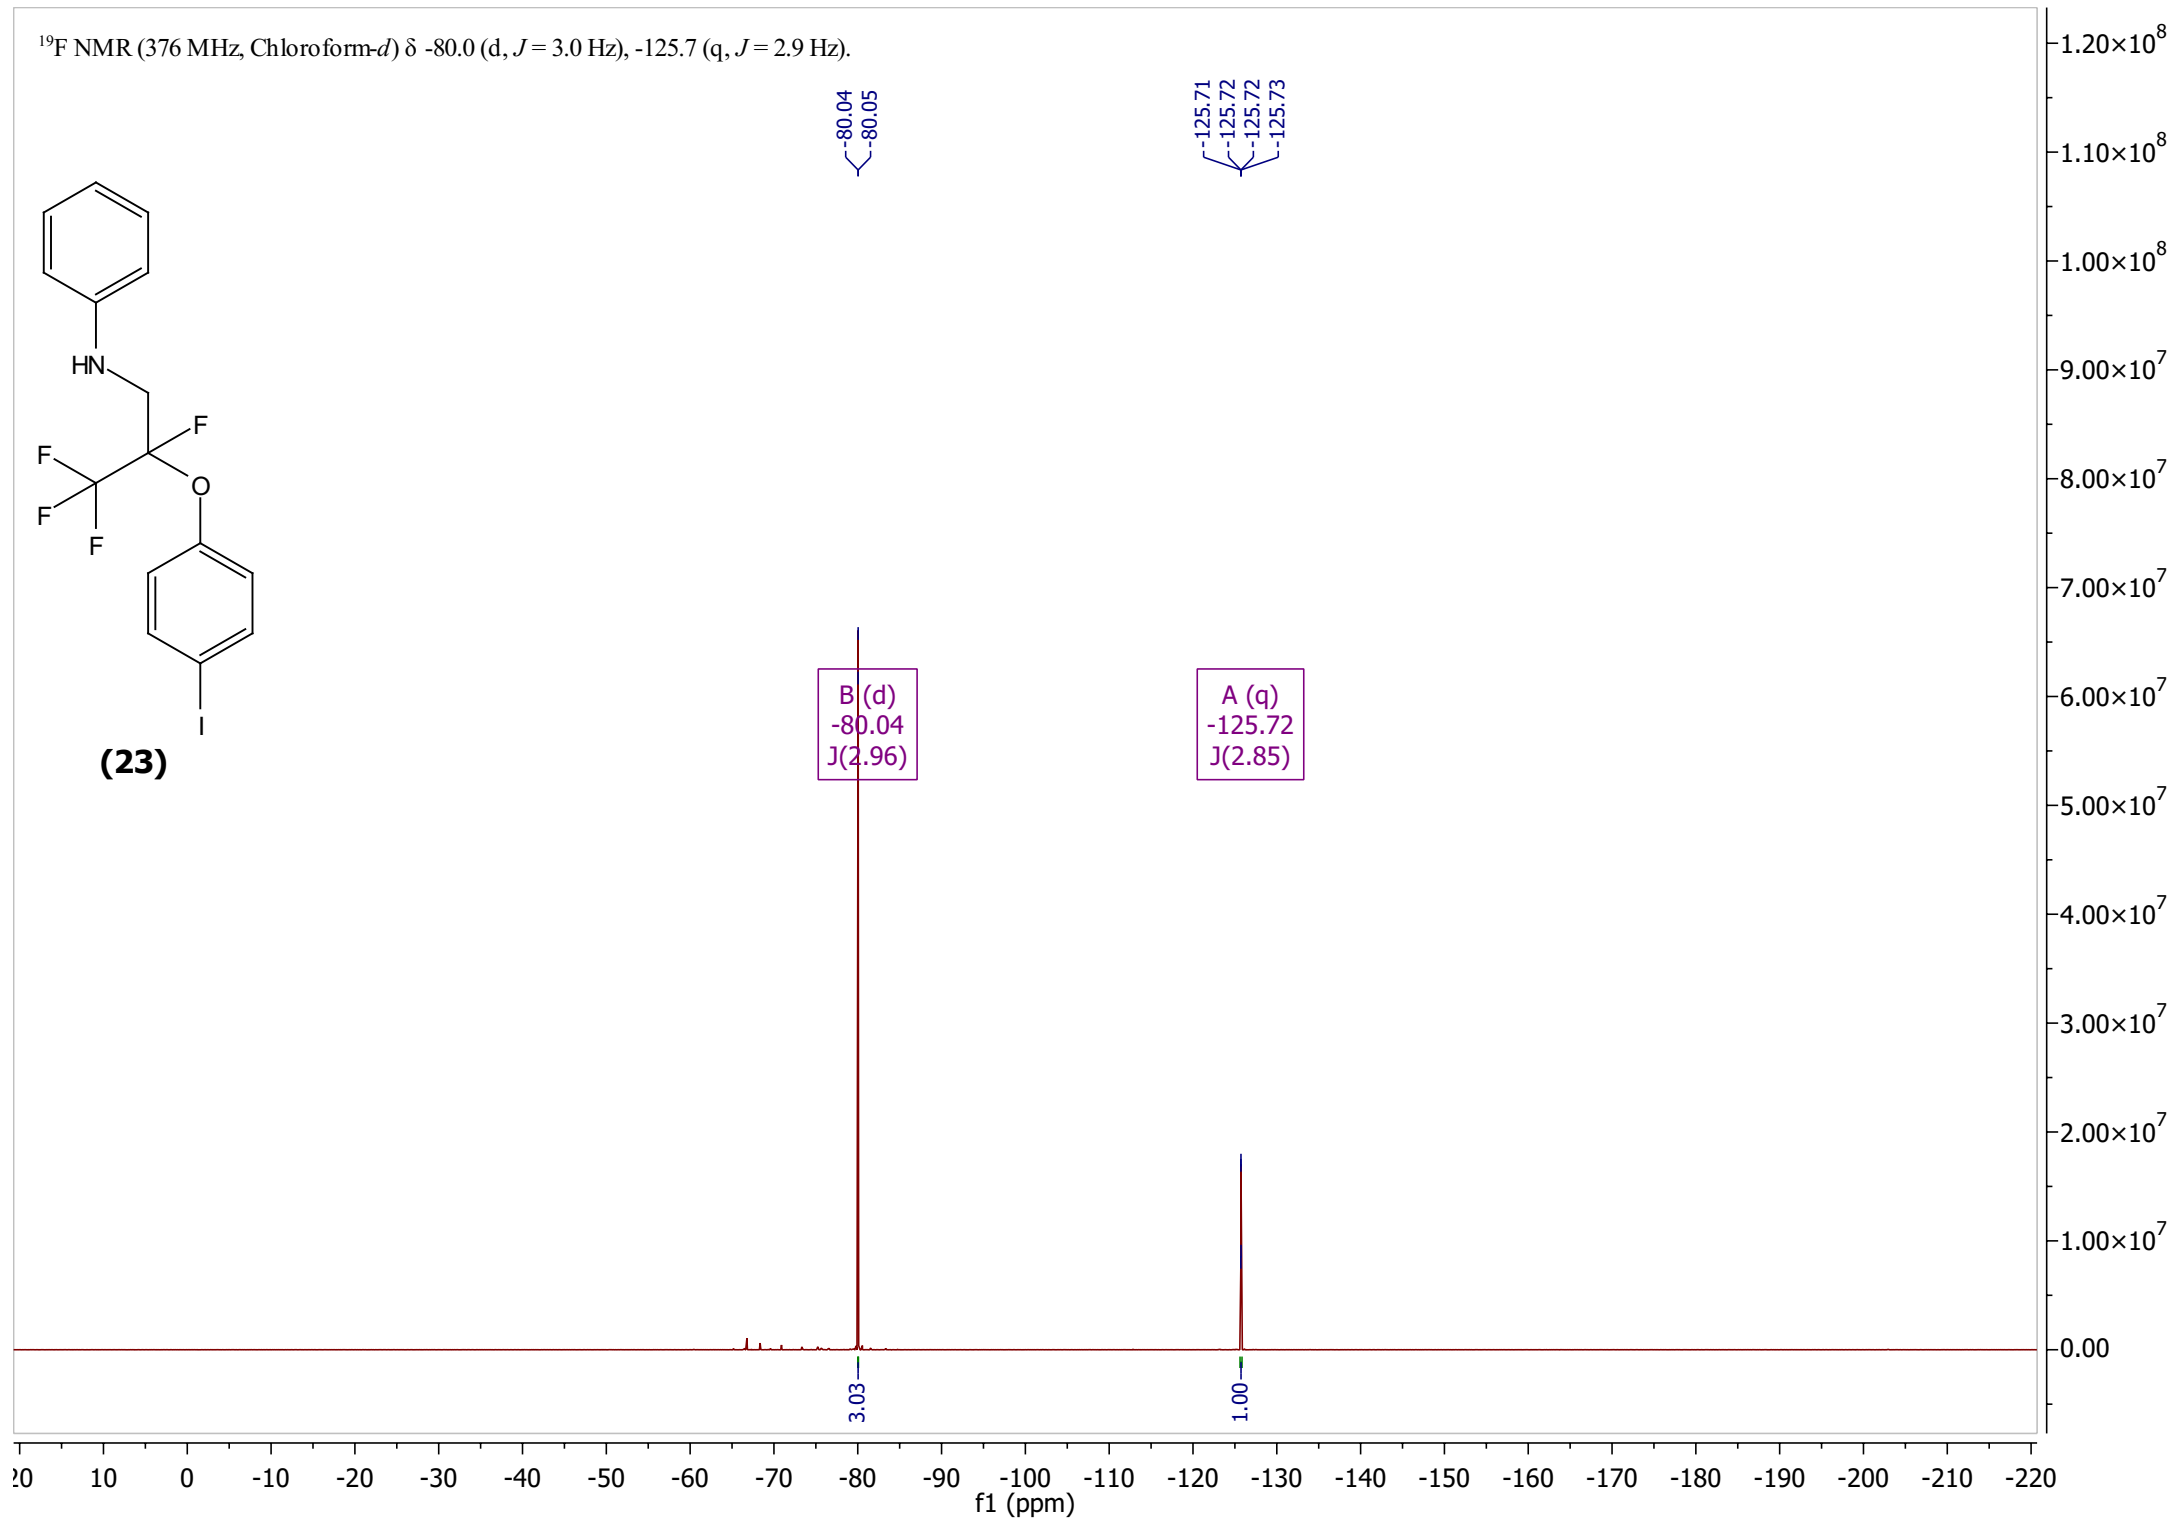



$^{13}\text{C}$  NMR (101 MHz, Chloroform-*d*)  $\delta$  151.6, 146.6, 138.8, 129.4, 124.4 (d,  $J = 2.1$  Hz), 120.6 (qd,  $J = 288.1, 37.8$  Hz), 118.9, 113.3, 108.7 (dq,  $J = 239.9, 33.1$  Hz), 90.1, 45.0 (d,  $J = 28.9$  Hz).

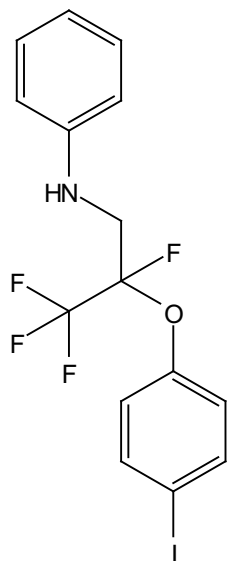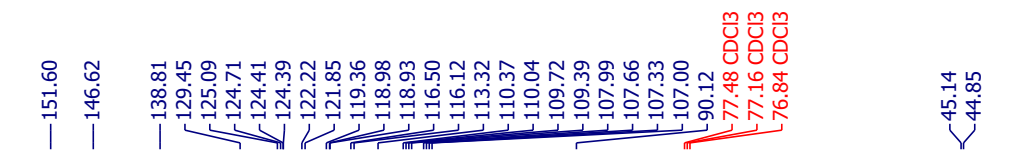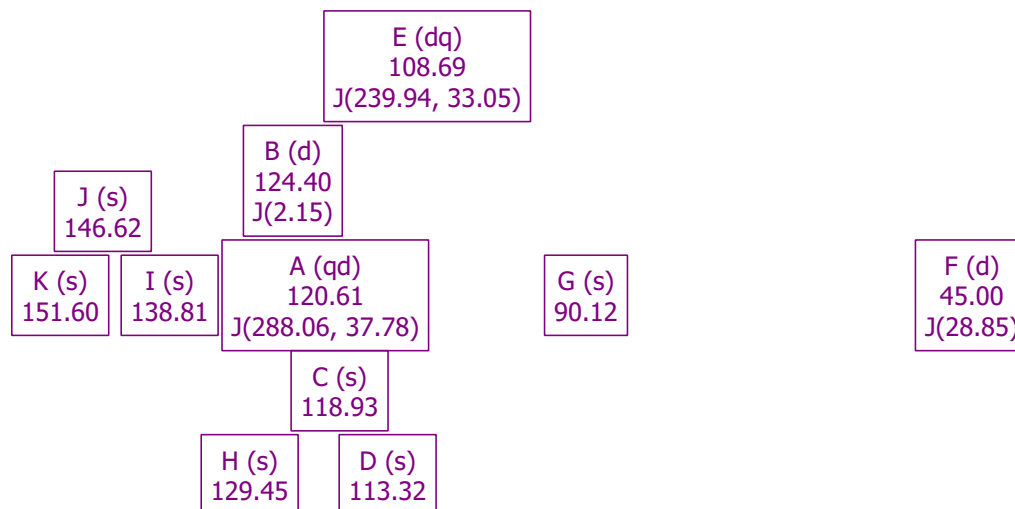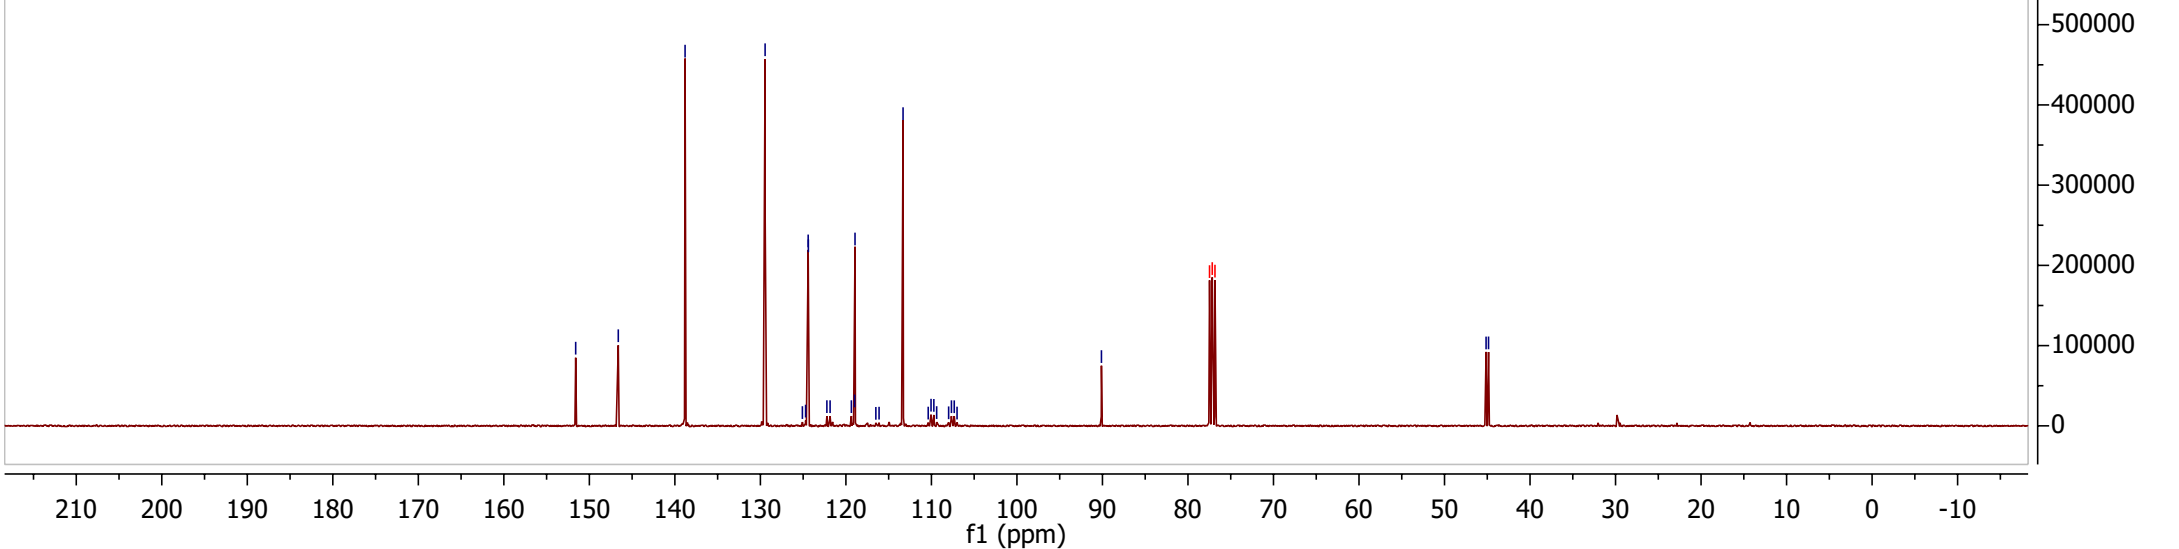

<sup>1</sup>H NMR (400 MHz, Chloroform-*d*) δ 7.81 (d, *J* = 8.7 Hz, 2H), 7.12 (d, *J* = 8.2 Hz, 2H), 7.04 (d, *J* = 7.6 Hz, 2H), 6.57 (d, *J* = 8.7 Hz, 2H), 4.39 (s, 1H), 3.90 – 3.72 (m, 2H), 2.49 (s, 3H), 2.32 (s, 3H).

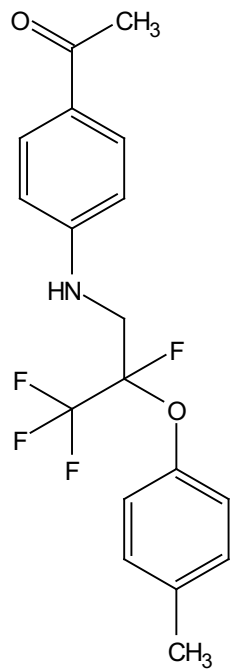

**(24)**

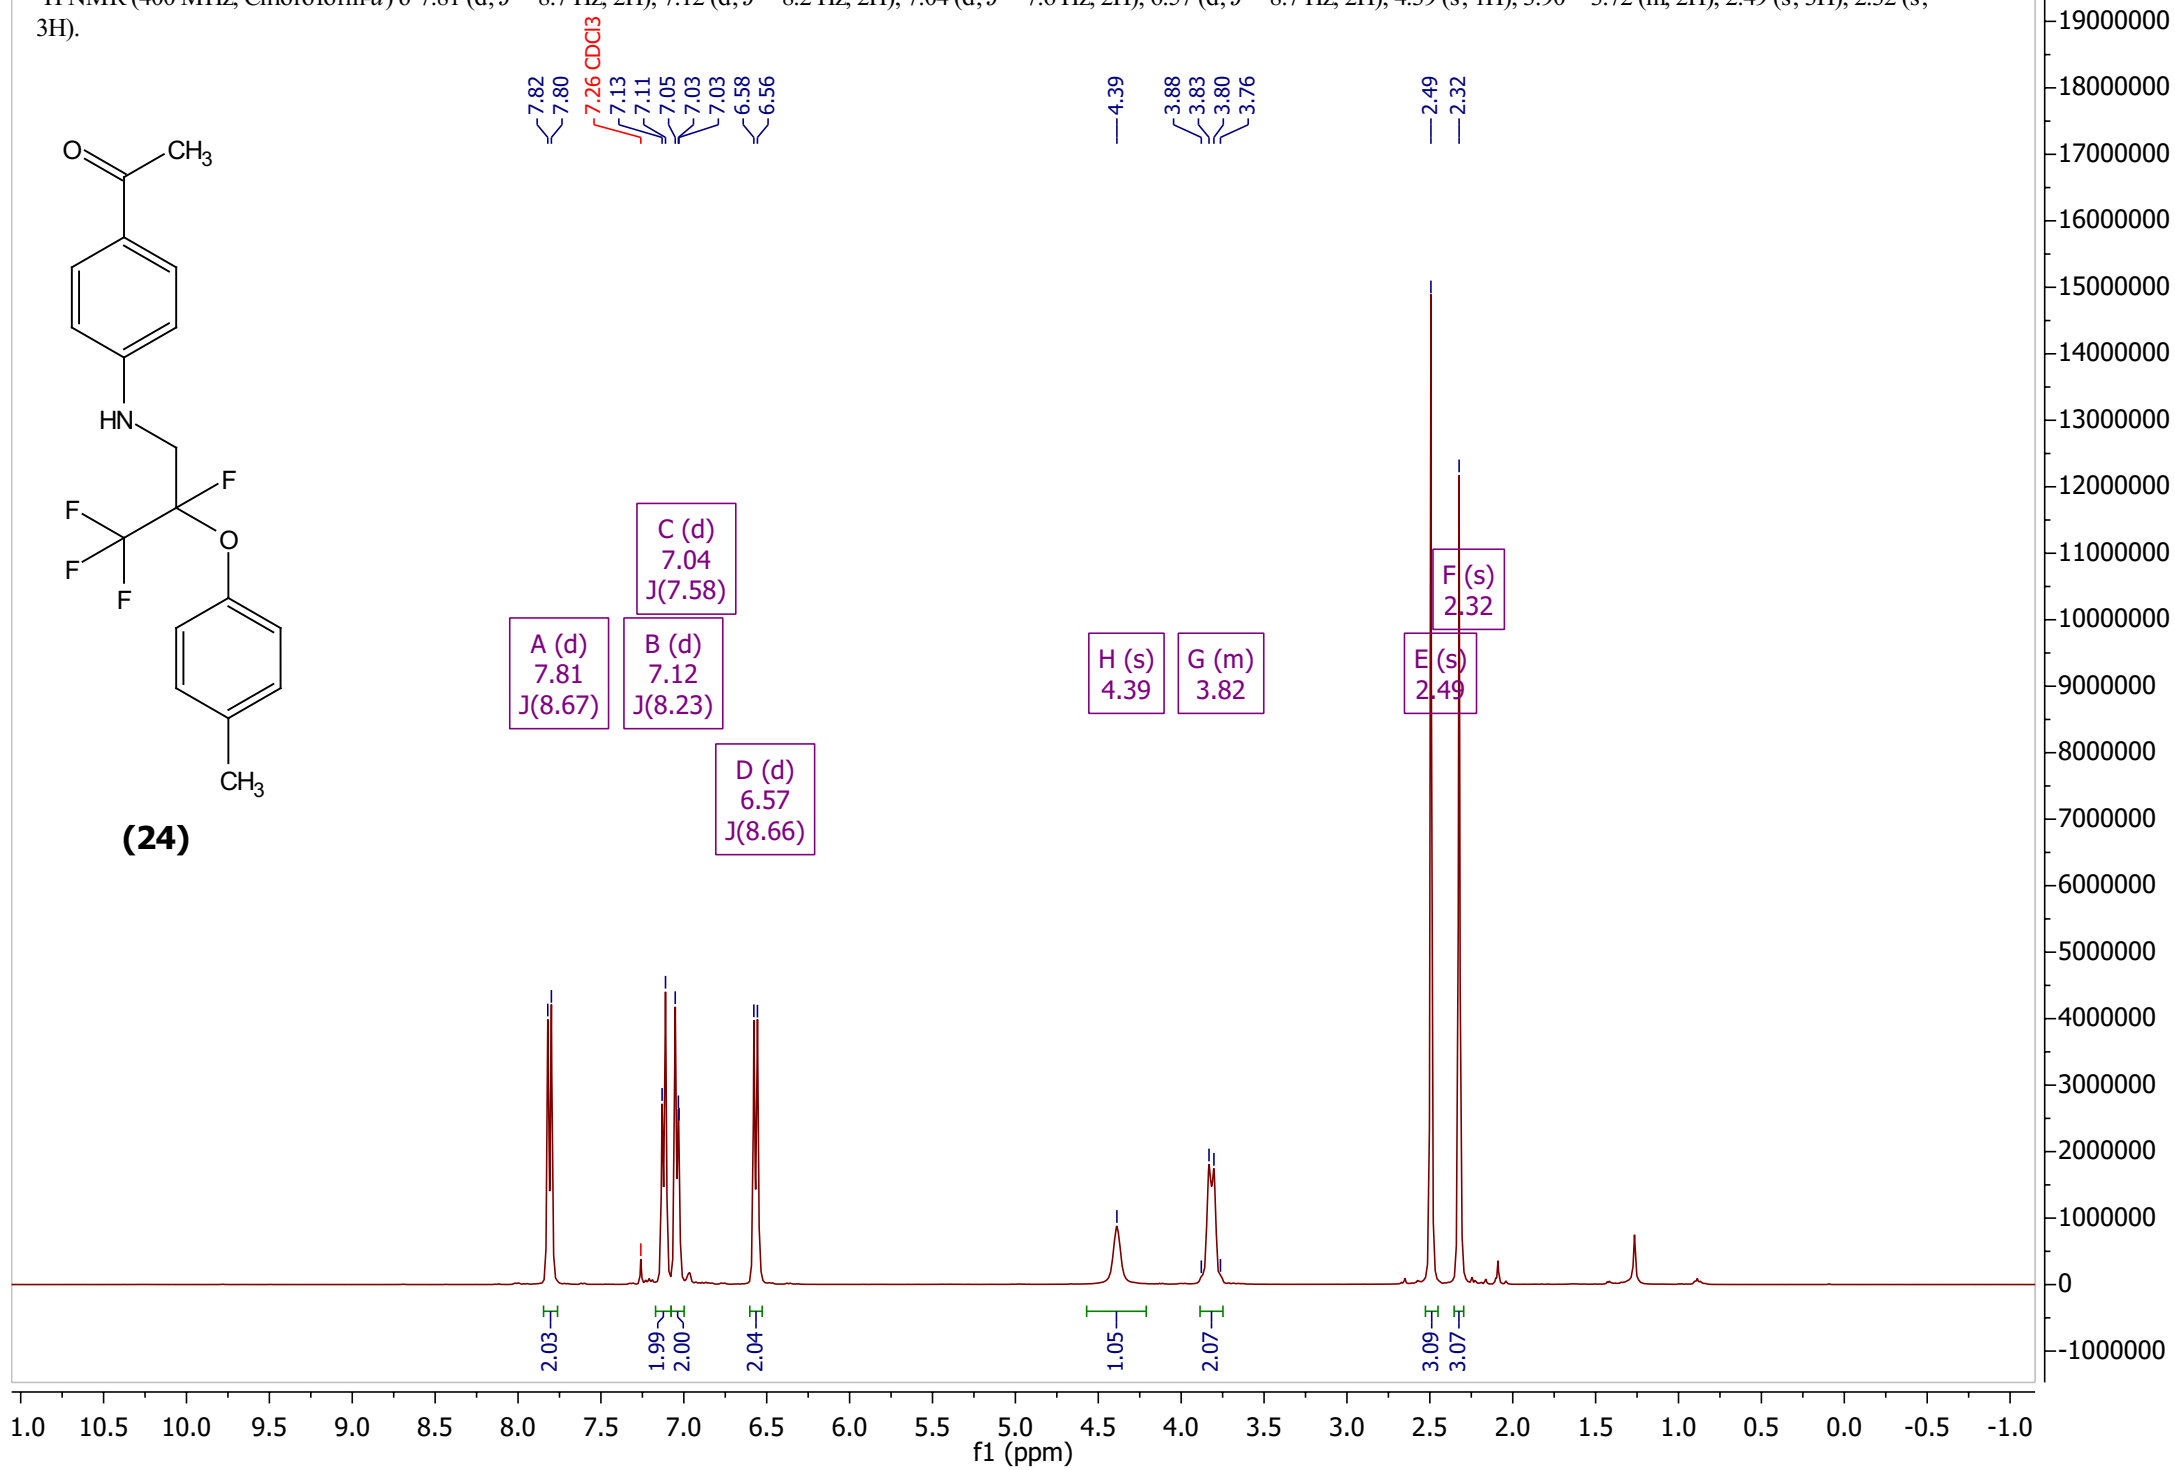

$^{19}\text{F}$  NMR (376 MHz, Chloroform-*d*)  $\delta$  -80.3 (d,  $J = 2.7$  Hz), -125.0 (q,  $J = 3.0$  Hz).



**(24)**

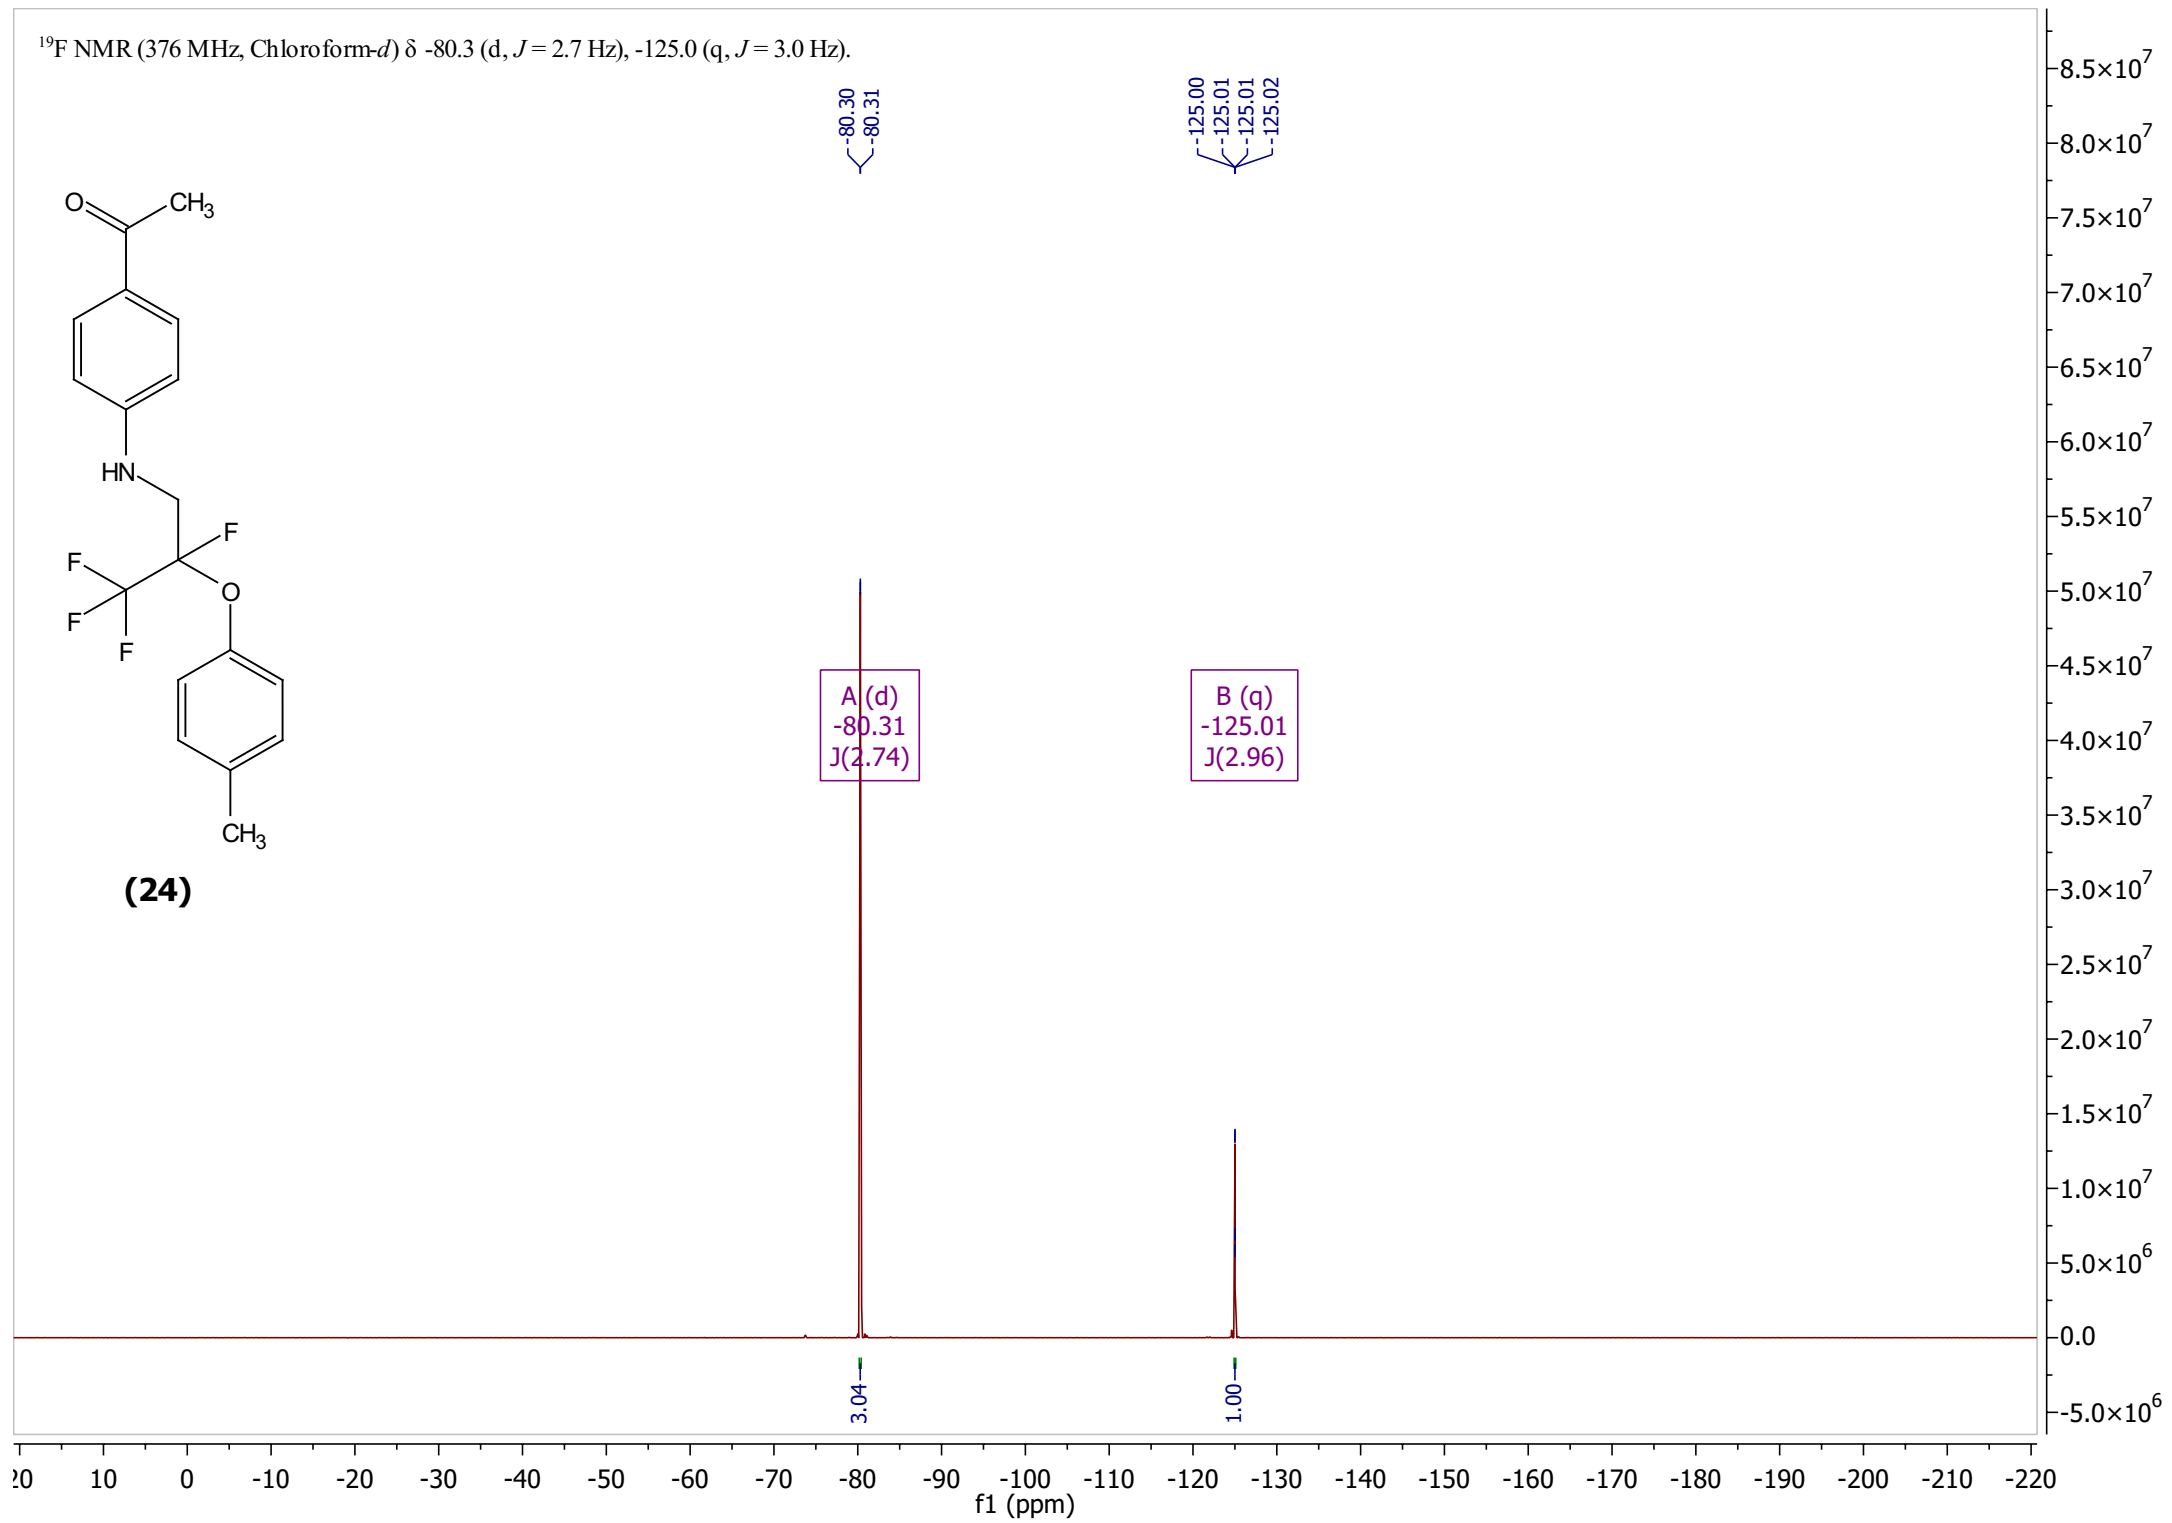

$^{13}\text{C}$  NMR (101 MHz, Chloroform-*d*)  $\delta$  196.5, 150.9, 149.2, 136.0, 130.8, 130.3, 128.0, 121.9 (d,  $J = 2.1$  Hz), 120.6 (qd,  $J = 287.8, 38.3$  Hz), 112.0, 108.3 (dq,  $J = 239.6, 33.0$  Hz), 44.1 (d,  $J = 29.4$  Hz), 26.1, 20.9.

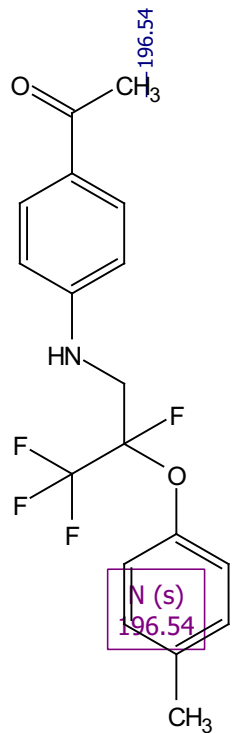

(24)

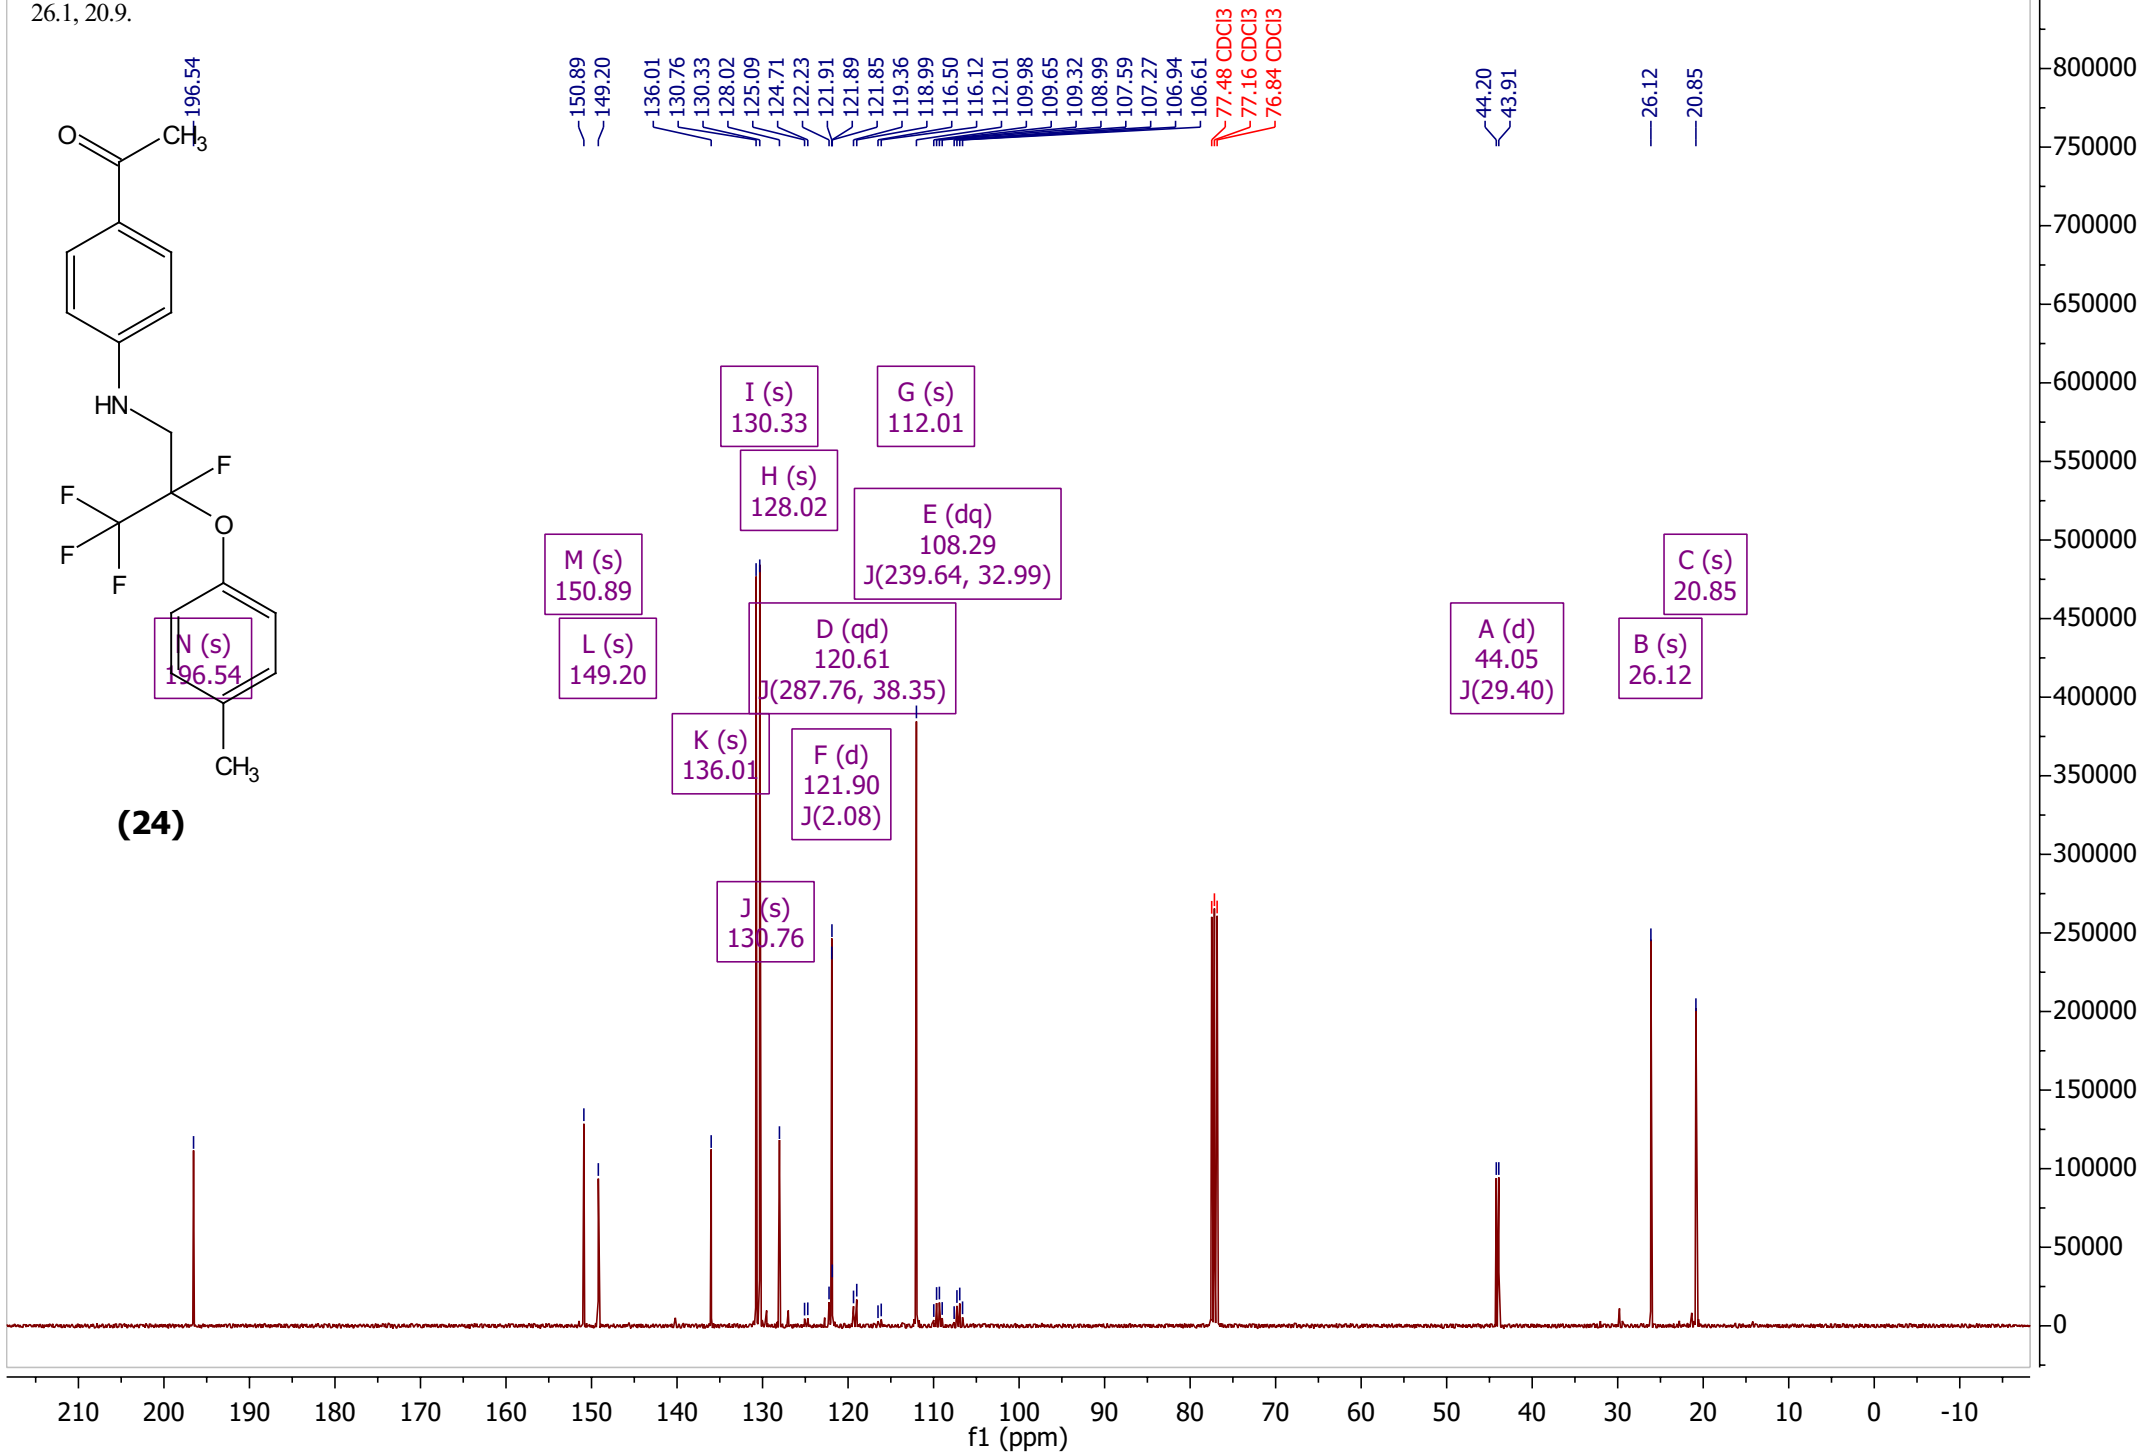

$^1\text{H NMR}$  (400 MHz, Chloroform- $d$ )  $\delta$  7.73 (d,  $J = 8.7$  Hz, 2H), 7.55 – 7.30 (m, 9H), 6.17 (d,  $J = 8.8$  Hz, 2H), 3.62 – 3.49 (m, 2H), 3.46 – 3.33 (m, 1H), 2.47 (s, 3H).

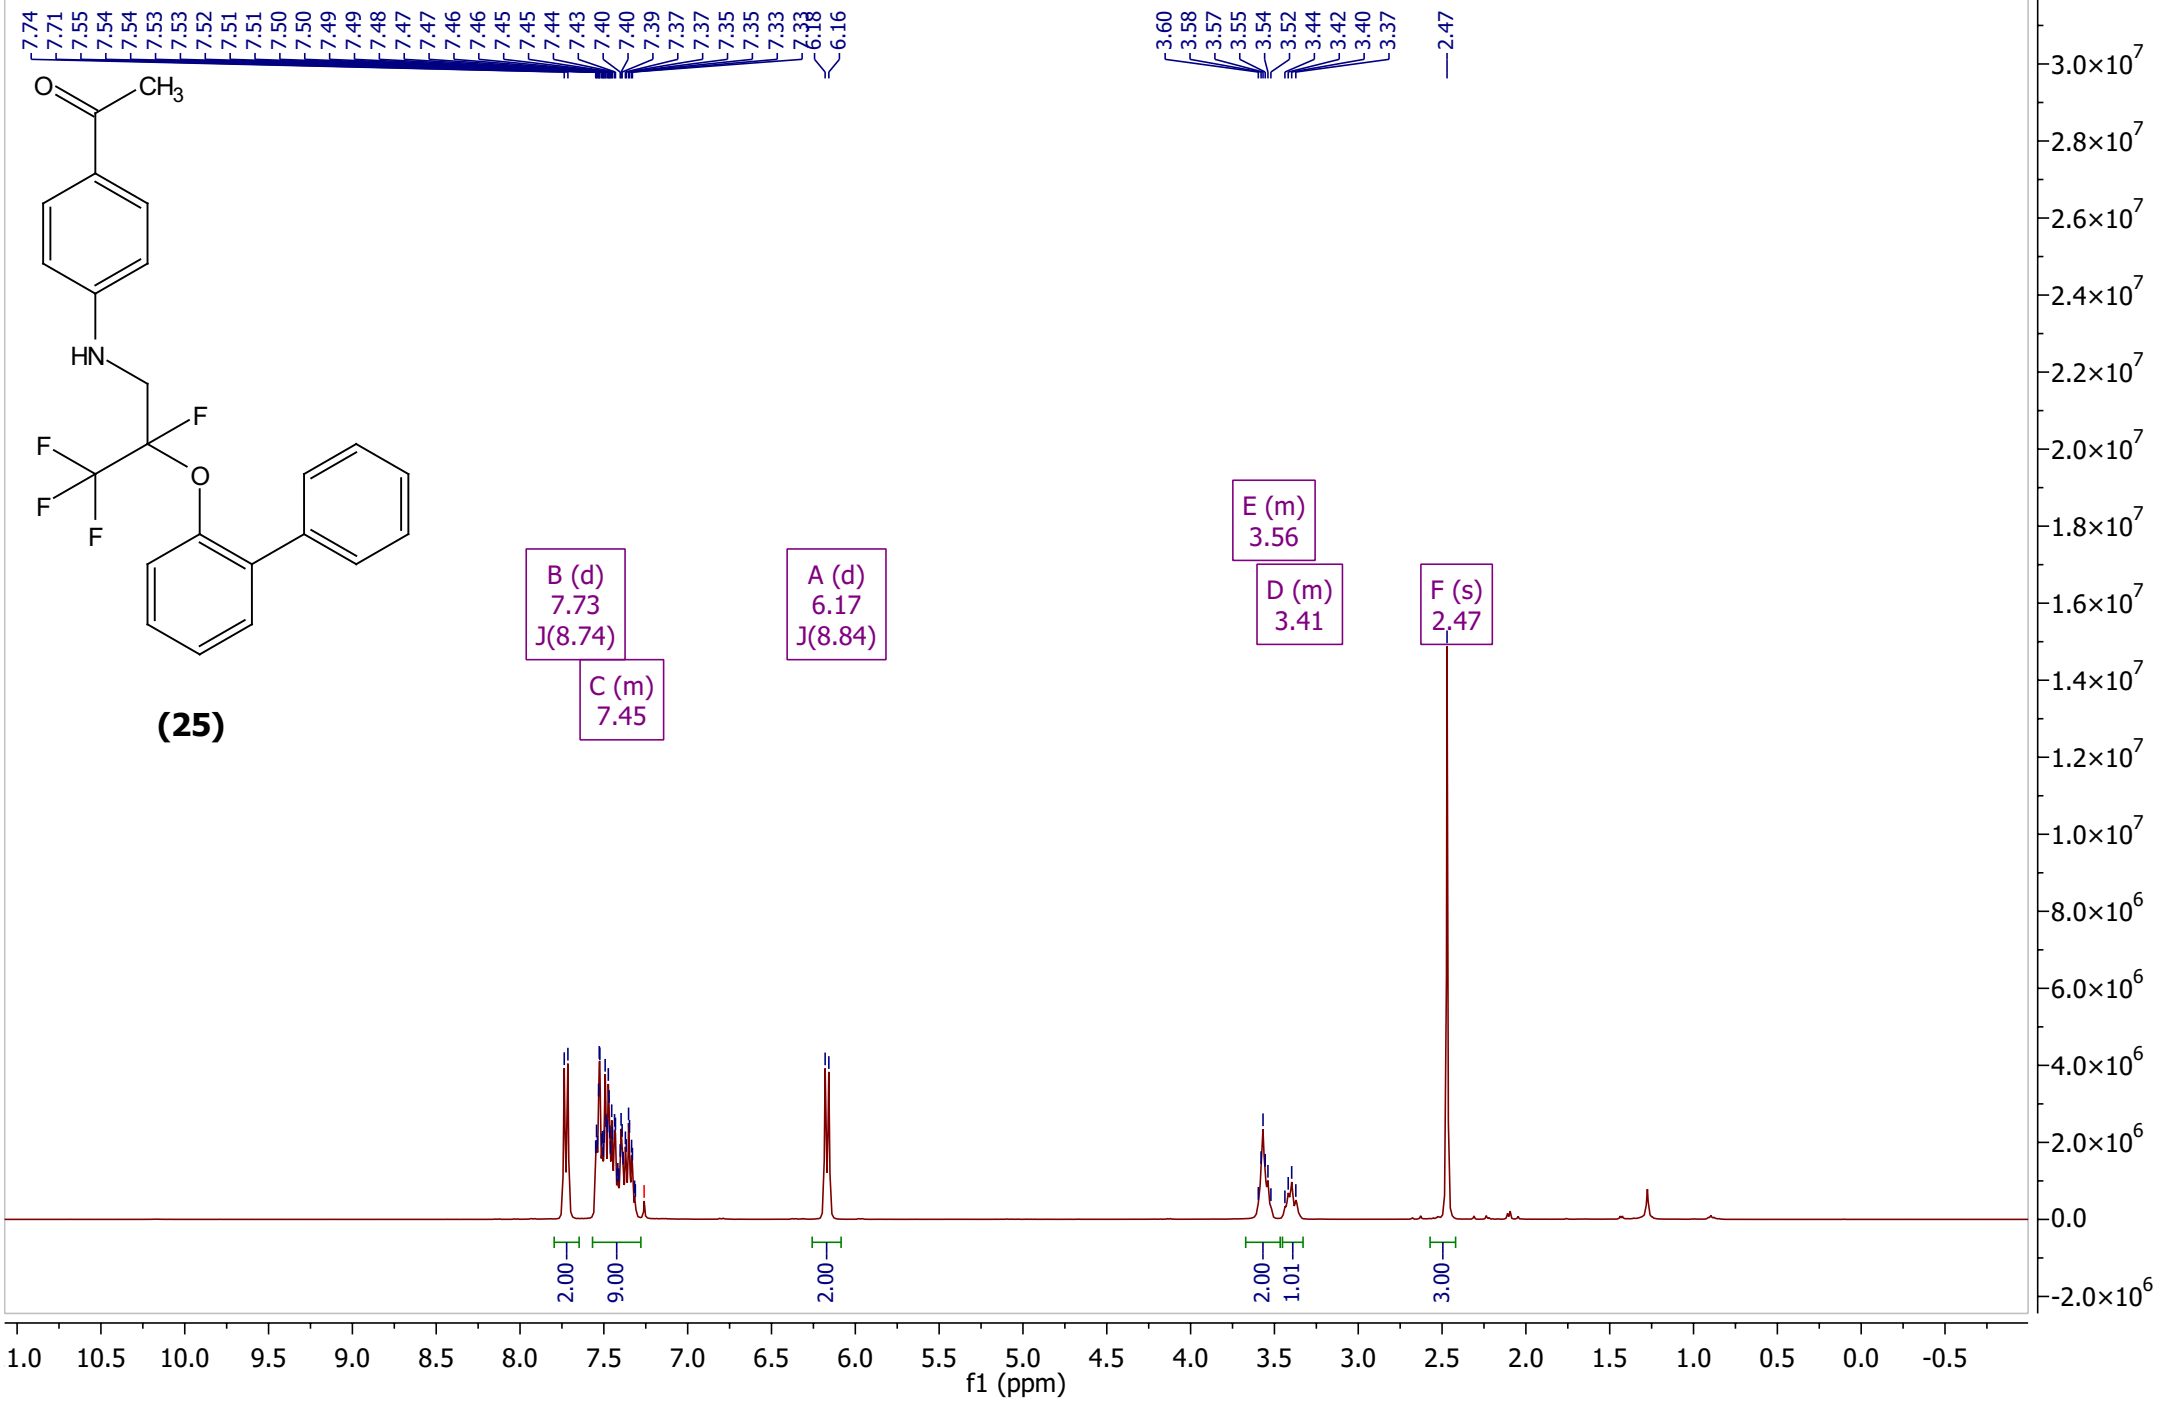

$^{19}\text{F}$  NMR (376 MHz, Chloroform-*d*)  $\delta$  -81.0 (d,  $J = 2.9$  Hz), -121.1 (q,  $J = 3.1$  Hz).

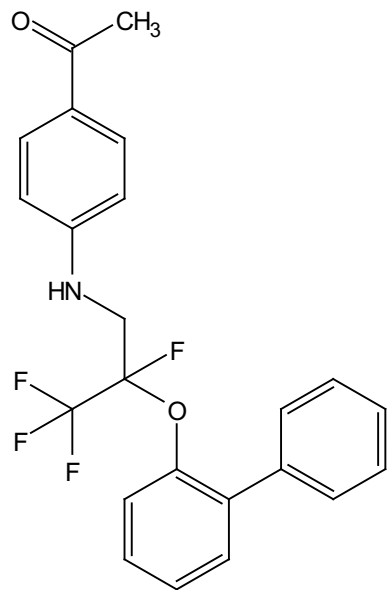

**(25)**

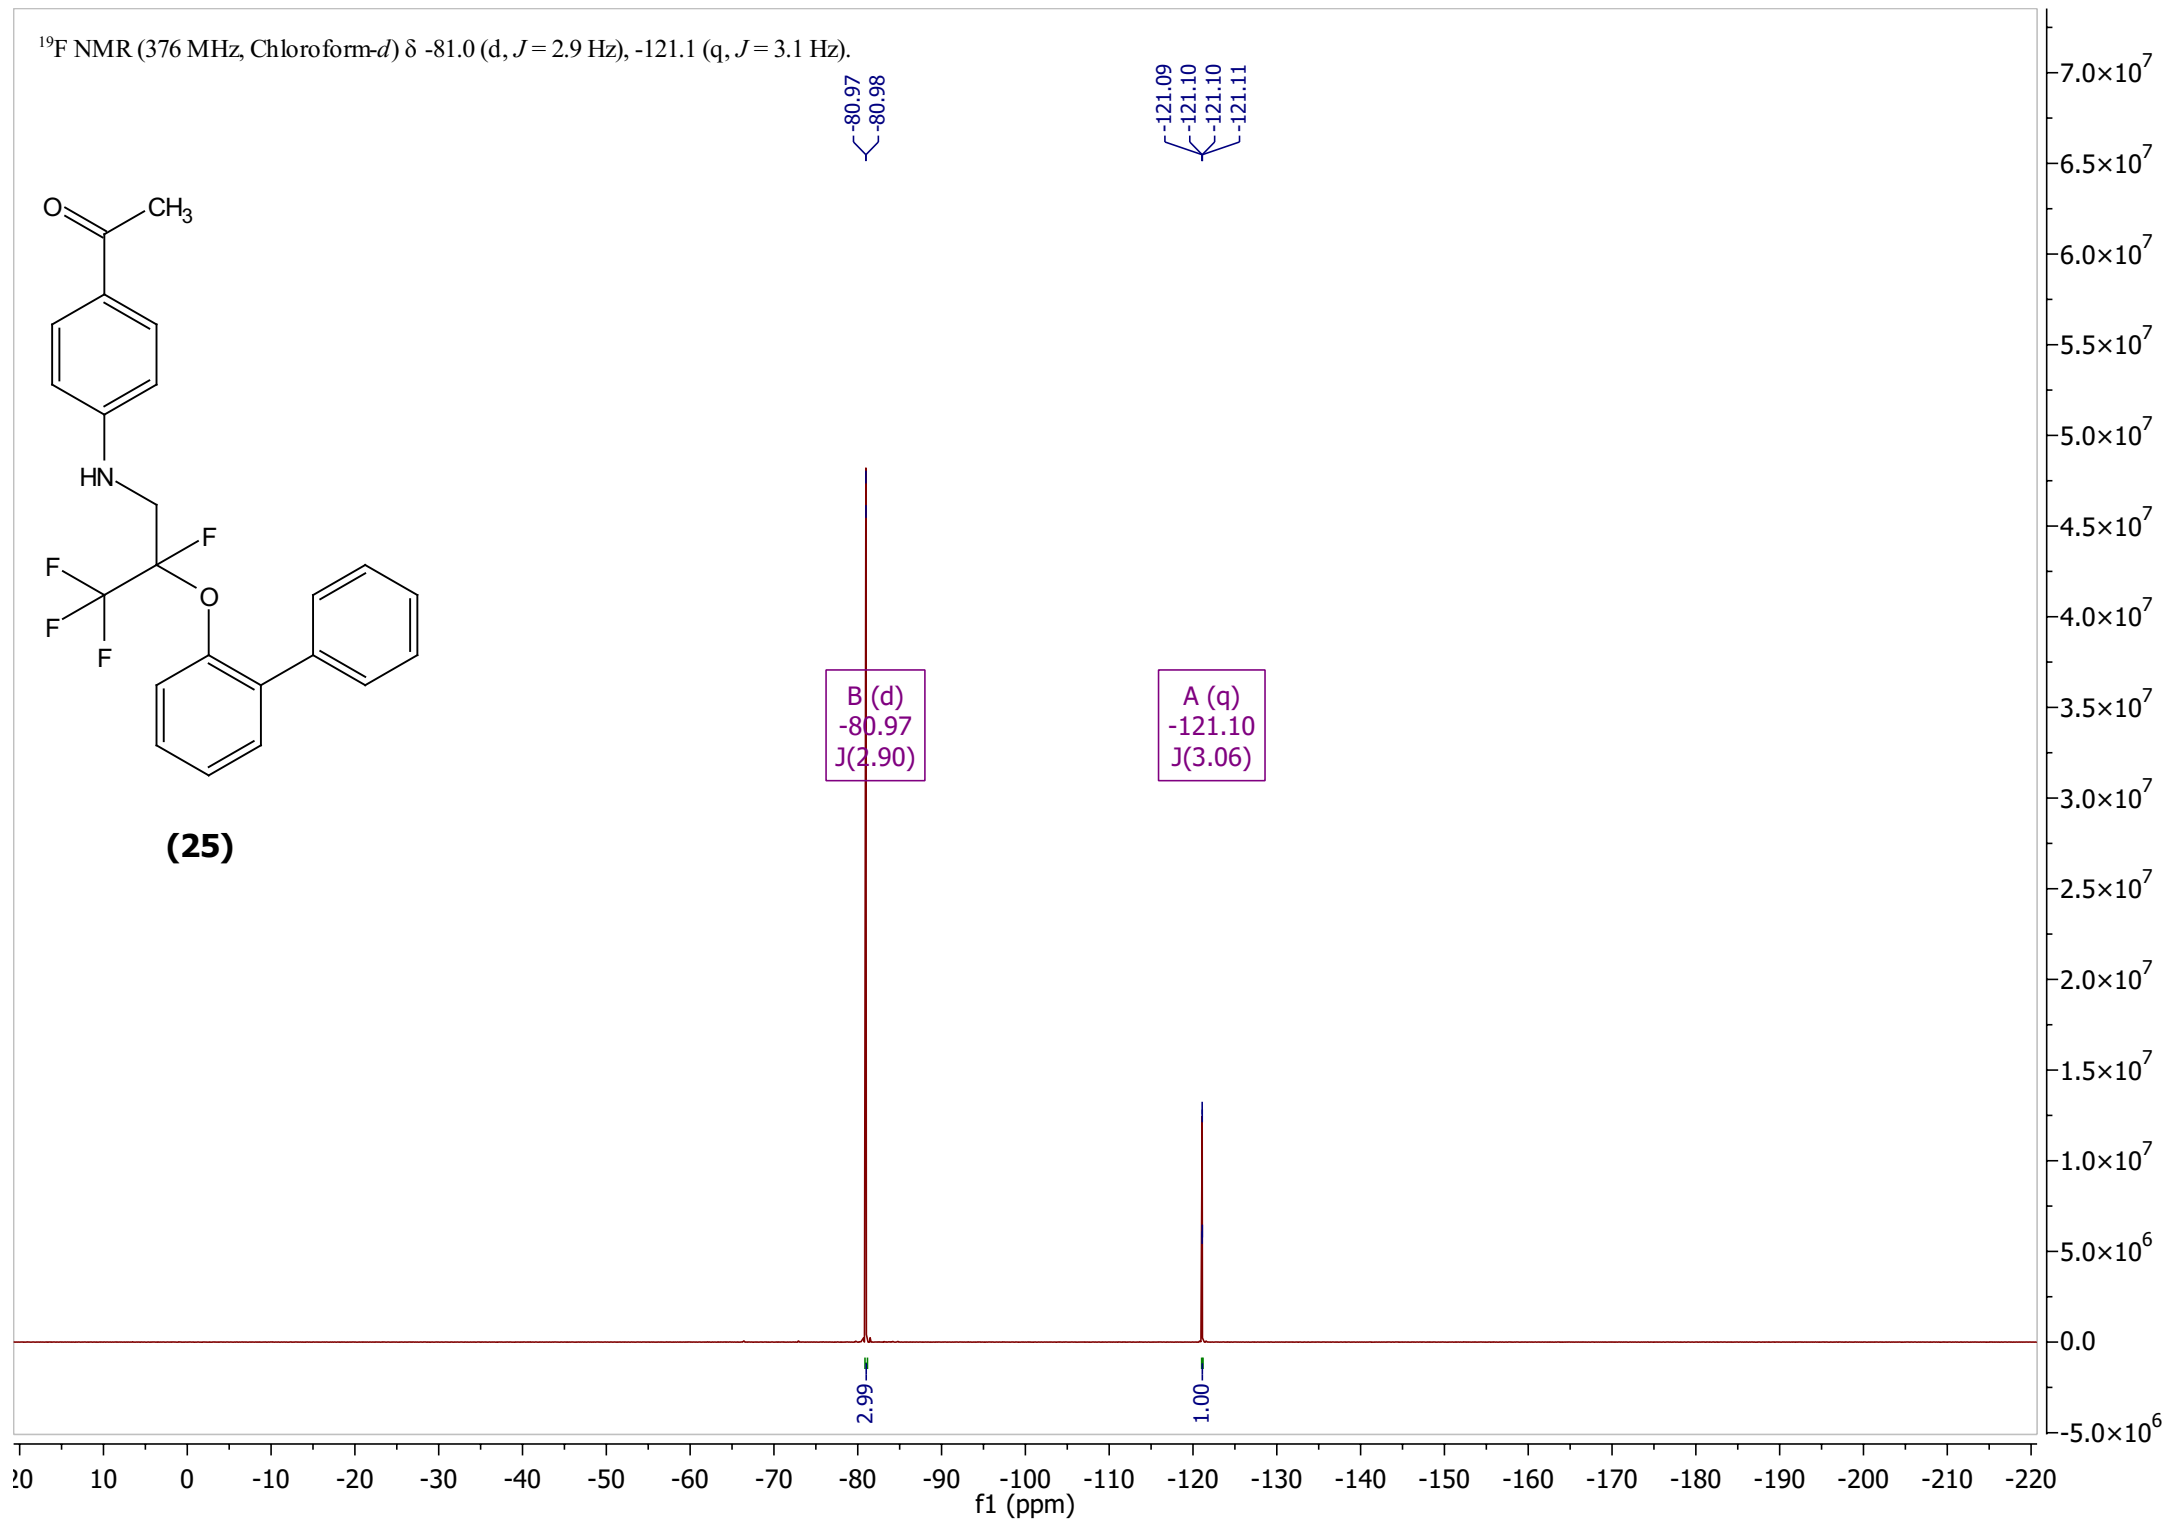

$^{13}\text{C}$  NMR (101 MHz, Chloroform- $d$ )  $\delta$  196.4, 150.3, 148.1 (d,  $J = 1.7$  Hz), 137.0, 135.2 (d,  $J = 1.8$  Hz), 131.5, 130.6, 129.8, 129.0, 128.6, 128.1, 127.8, 126.8, 123.3 (d,  $J = 2.4$  Hz), 120.3 (qd,  $J = 287.2, 35.6$  Hz), 111.7, 108.6 (dq,  $J = 239.9, 33.6$  Hz), 42.9 (d,  $J = 33.8$  Hz), 26.1.

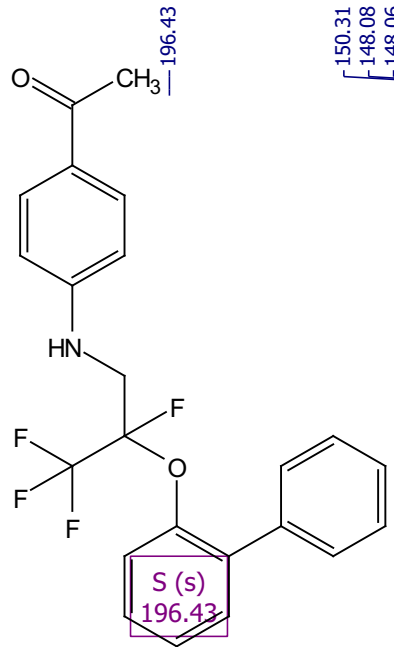

(25)

150.31  
148.08  
148.06  
137.03  
135.24  
135.22  
131.46  
130.57  
129.77  
128.98  
128.65  
128.13  
127.79  
126.79  
124.77  
124.42  
123.34  
123.31  
121.92  
121.56  
119.06  
118.71  
116.21  
115.86  
111.73  
110.26  
109.93  
109.59  
109.26  
107.88  
107.54  
107.21  
106.87  
77.48 CDCl3  
77.16 CDCl3  
76.84 CDCl3

43.09  
42.75

26.10

M (s)  
128.65

K (s)  
129.77

I (s)  
131.46

G (d)  
135.23  
J(1.79)

B (dq)  
108.57  
J(239.85, 33.57)

Q (d)  
148.07  
J(1.72)

A (qd)  
120.31  
J(287.18, 35.59)

E (d)  
42.92  
J(33.76)

F (s)  
26.10

R (s)  
150.31

H (s)  
137.03

D (d)  
123.33  
J(2.38)

C (s)  
111.73

J (s)  
130.57

L (s)  
128.98

N (s)  
128.13

210 200 190 180 170 160 150 140 130 120 110 100 90 80 70 60 50 40 30 20 10 0 -10  
f1 (ppm)

$^1\text{H NMR}$  (400 MHz, Chloroform- $d$ )  $\delta$  7.45 (t,  $J = 1.5$  Hz, 1H), 7.16 (t,  $J = 1.5$  Hz, 2H), 6.96 (d,  $J = 7.8$  Hz, 1H), 6.80 – 6.69 (m, 2H), 6.39 (dd,  $J = 8.2, 2.5$  Hz, 1H), 3.77 – 3.63 (m, 3H).

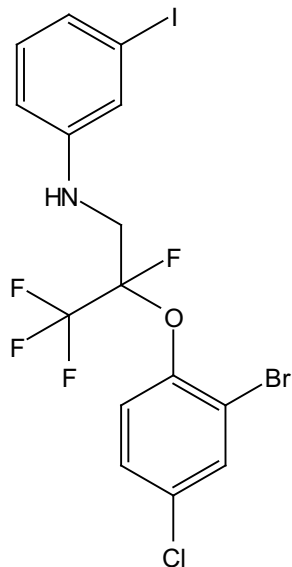

**(26)**

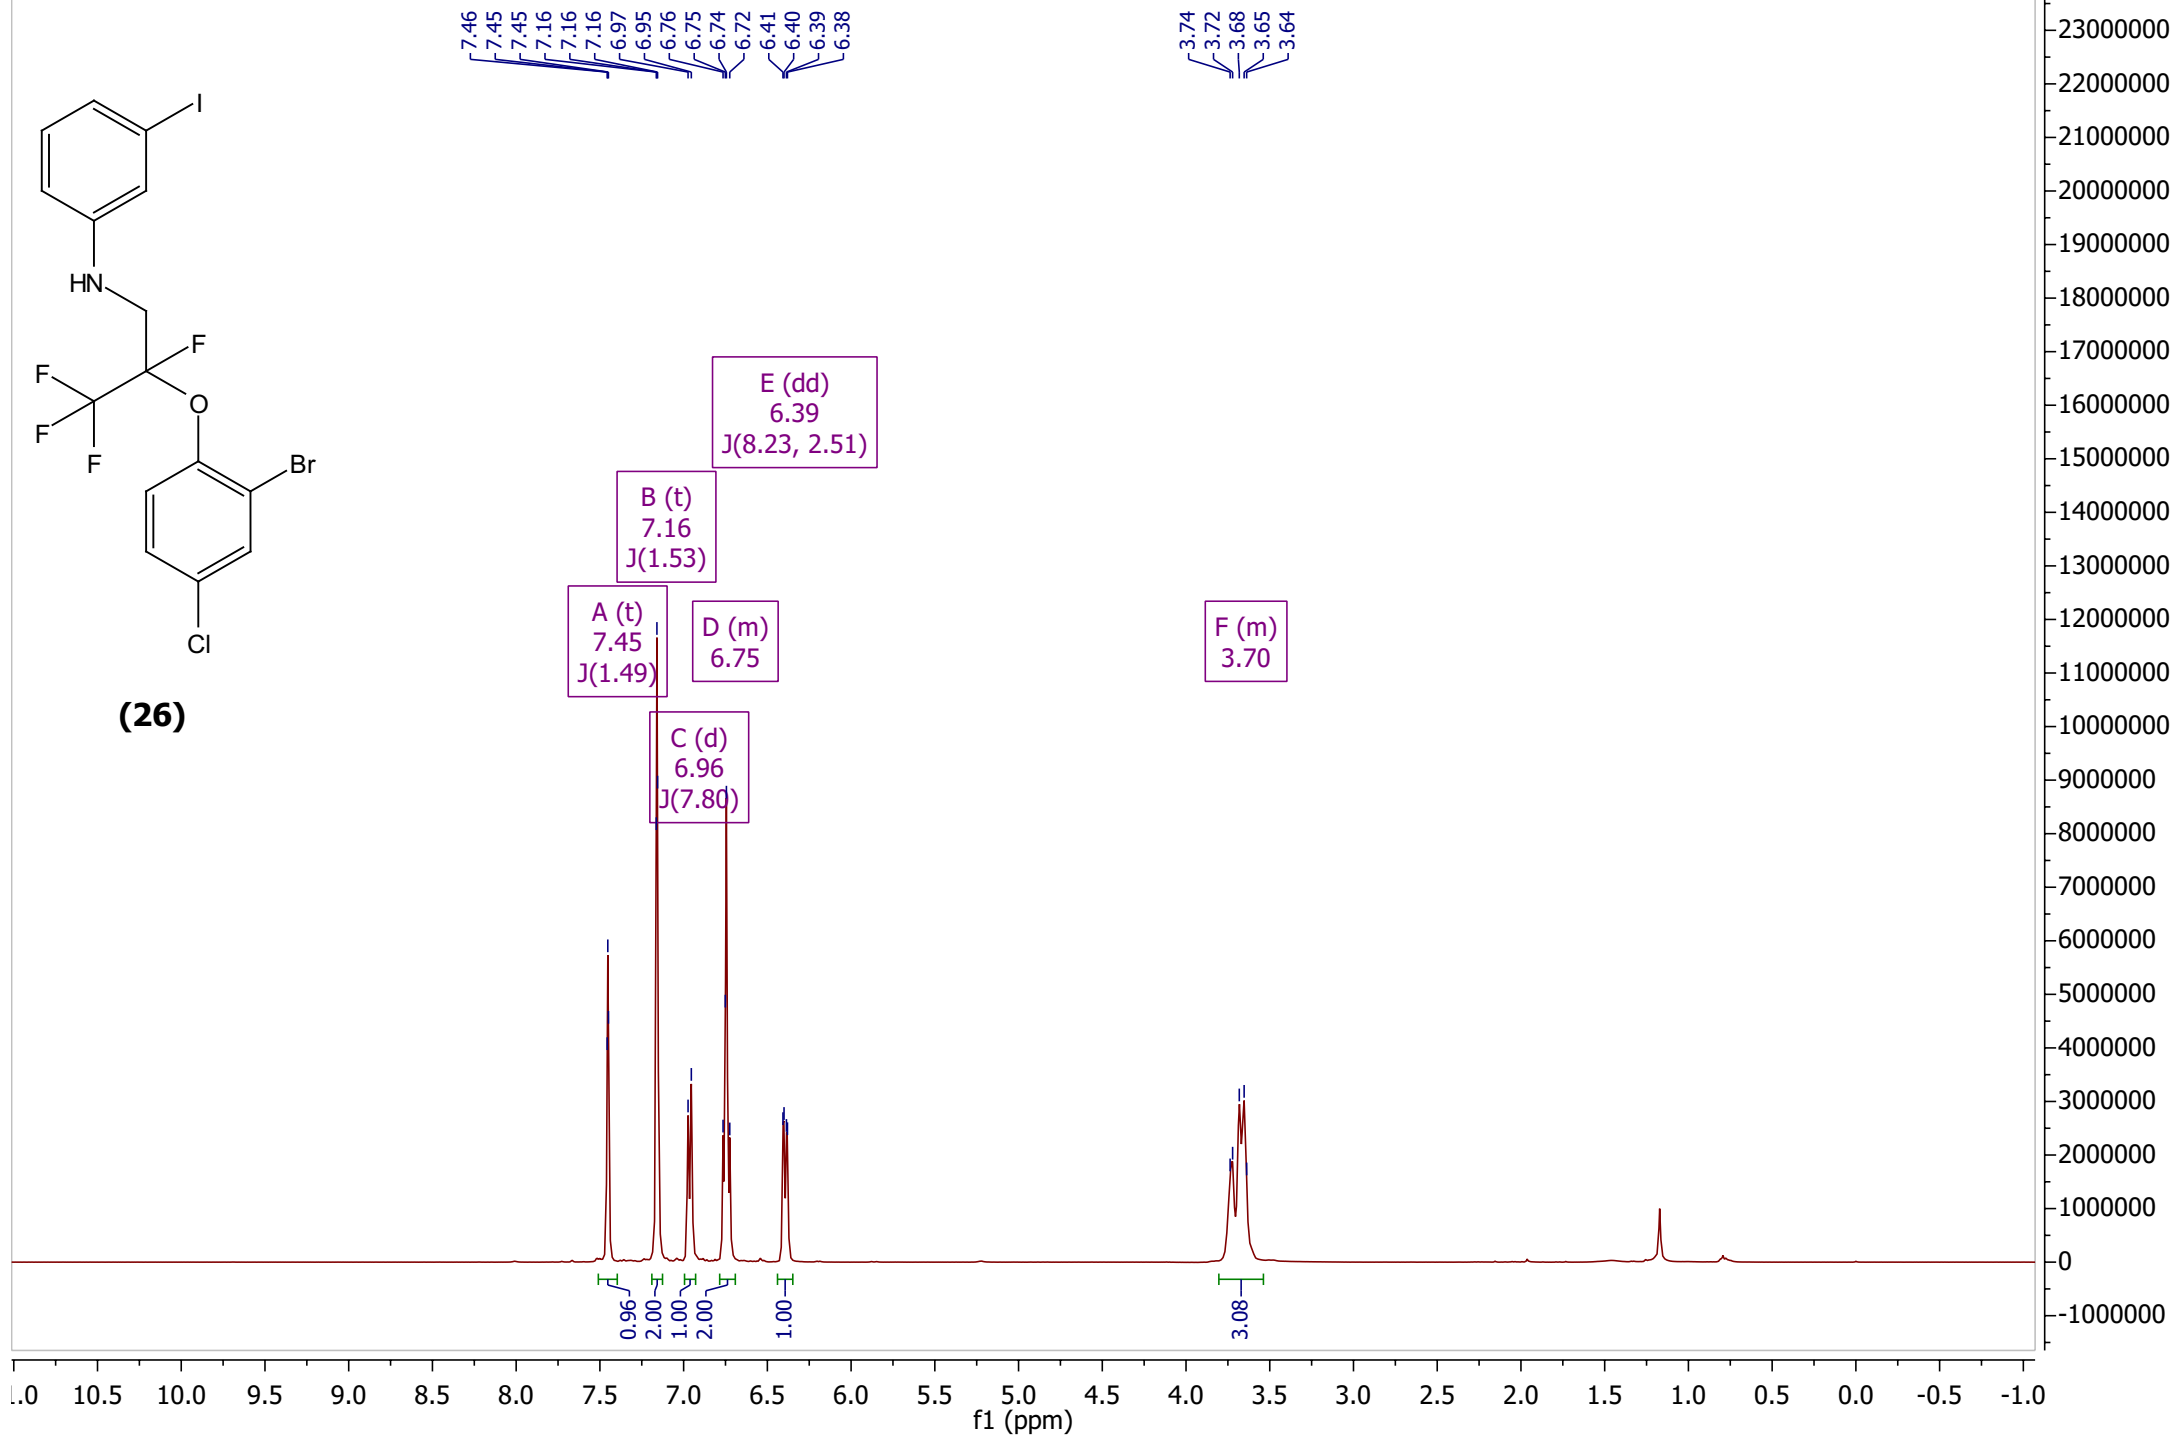



$^{19}\text{F}$  NMR (376 MHz, Chloroform-*d*)  $\delta$  -80.6 (d,  $J = 3.3$  Hz), -123.0 (q,  $J = 3.0$  Hz).

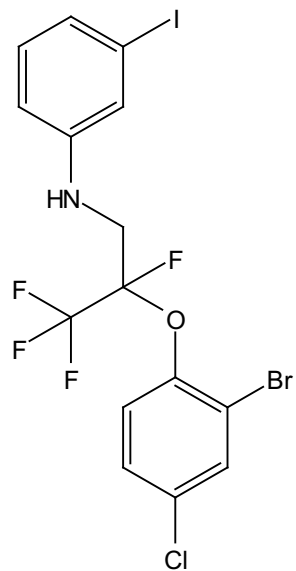

**(26)**

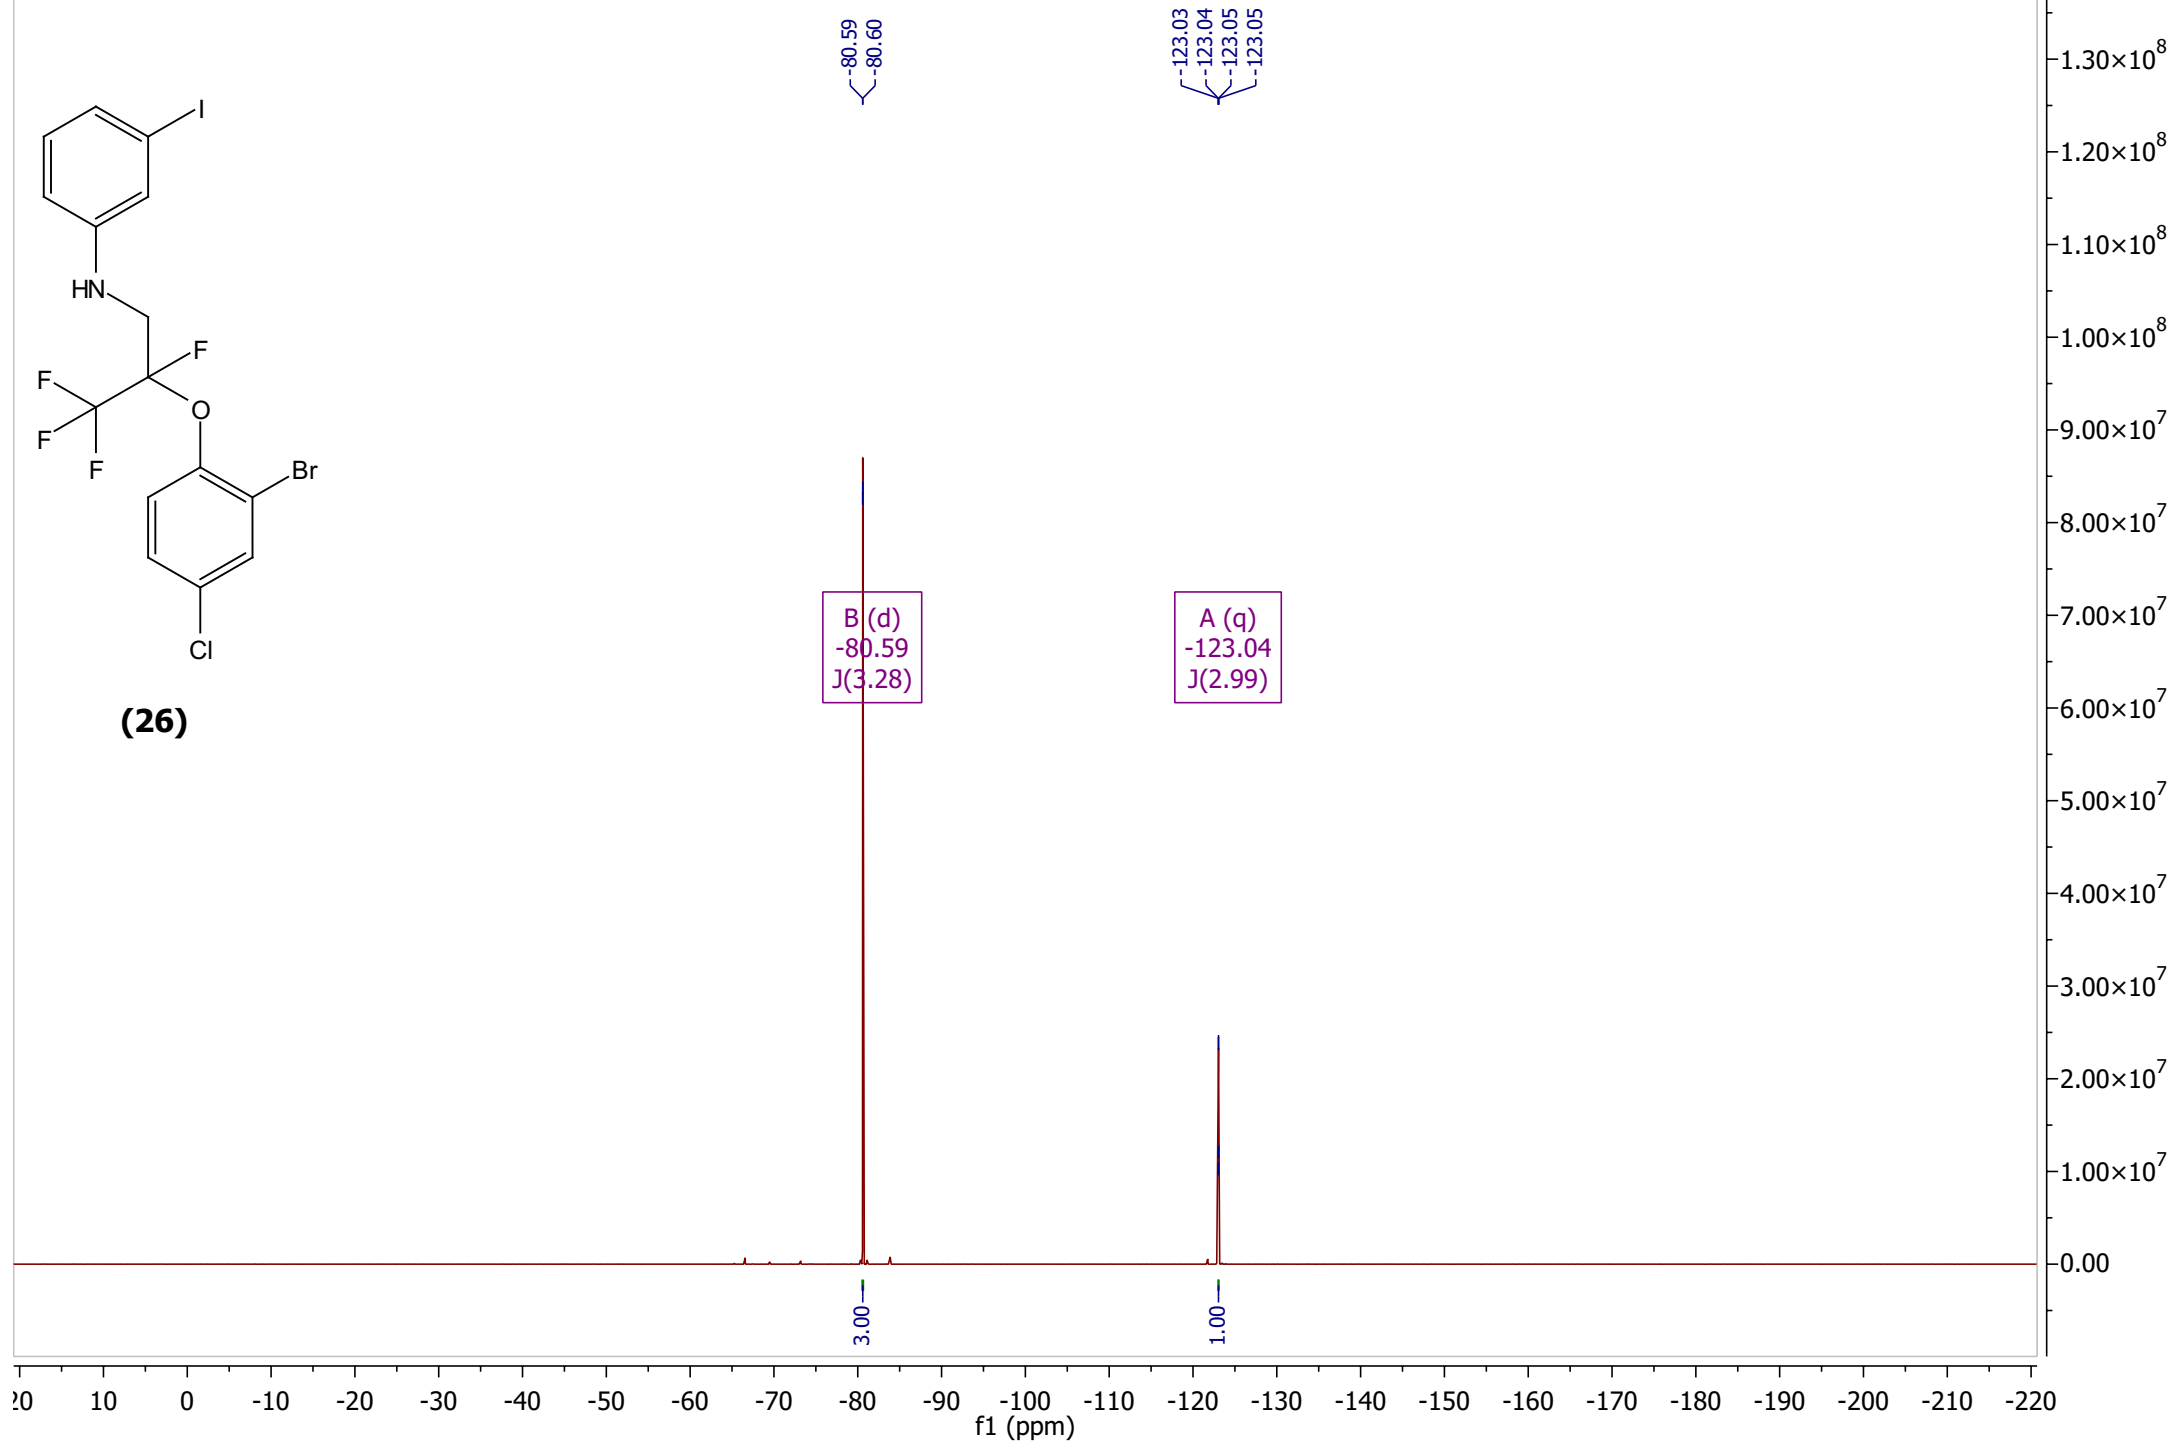

$^{13}\text{C}$  NMR (101 MHz, Chloroform-*d*)  $\delta$  147.8 (d,  $J = 1.9$  Hz), 147.4, 133.5, 132.0, 130.8, 128.9, 127.8, 123.7 (d,  $J = 3.2$  Hz), 121.6, 120.3 (qd,  $J = 287.3, 36.6$  Hz), 116.8 (d,  $J = 2.9$  Hz), 112.5, 109.2 (dq,  $J = 242.2, 33.9$  Hz), 95.2, 44.0 (d,  $J = 29.1$  Hz).

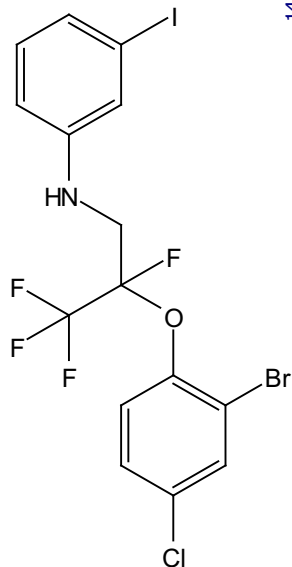

**(26)**

147.78  
147.76  
147.40  
133.54  
132.02  
130.75  
128.89  
127.78  
124.80  
124.44  
123.74  
123.71  
121.94  
121.61  
121.58  
119.08  
118.72  
116.79  
116.76  
116.22  
115.86  
112.47  
110.90  
110.57  
110.23  
109.90  
108.50  
108.16  
107.83  
107.49  
95.17

77.48 CDCl3  
77.16 CDCl3  
76.84 CDCl3

44.17  
43.88

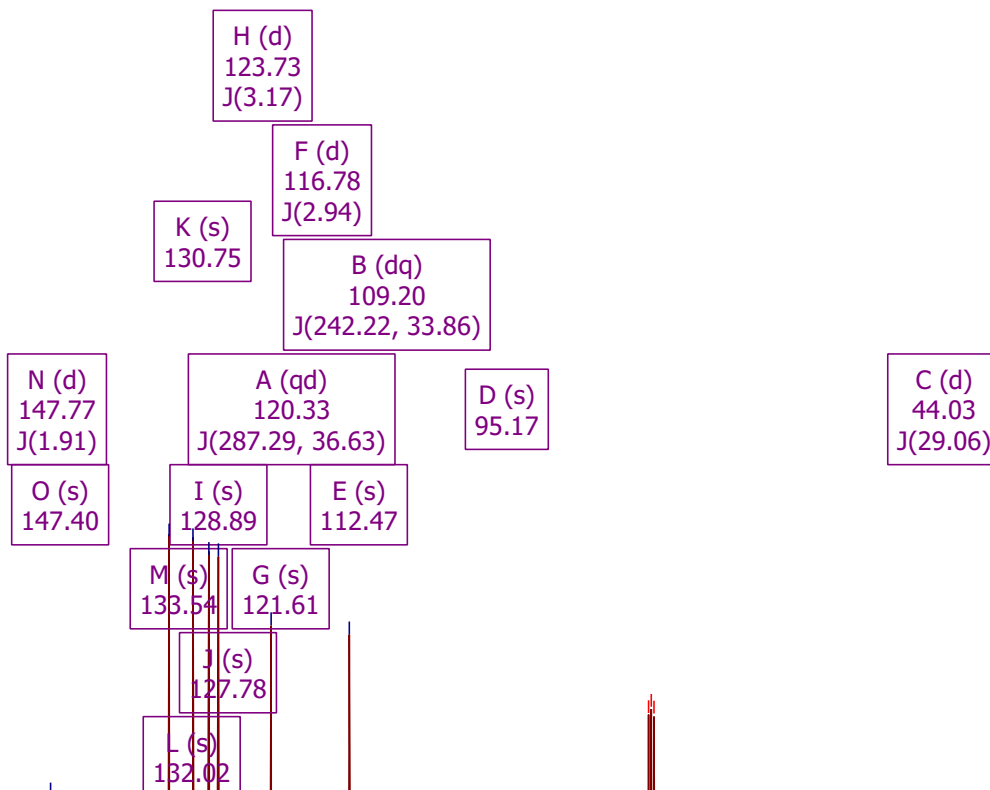

210 200 190 180 170 160 150 140 130 120 110 100 90 80 70 60 50 40 30 20 10 0 -10  
f1 (ppm)

<sup>1</sup>H NMR (400 MHz, Chloroform-*d*) δ 7.83 (d, *J* = 8.6 Hz, 1H), 7.41 (dd, *J* = 7.9, 1.6 Hz, 1H), 7.36 – 7.30 (m, 2H), 7.14 (td, *J* = 8.0, 1.6 Hz, 1H), 6.99 – 6.90 (m, 1H), 6.62 (td, *J* = 7.6, 1.5 Hz, 1H), 6.55 (d, *J* = 8.2 Hz, 1H), 4.51 (t, *J* = 6.5 Hz, 1H), 4.05 – 3.80 (m, 2H).

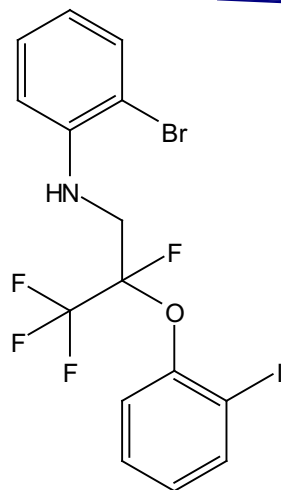

**(27)**

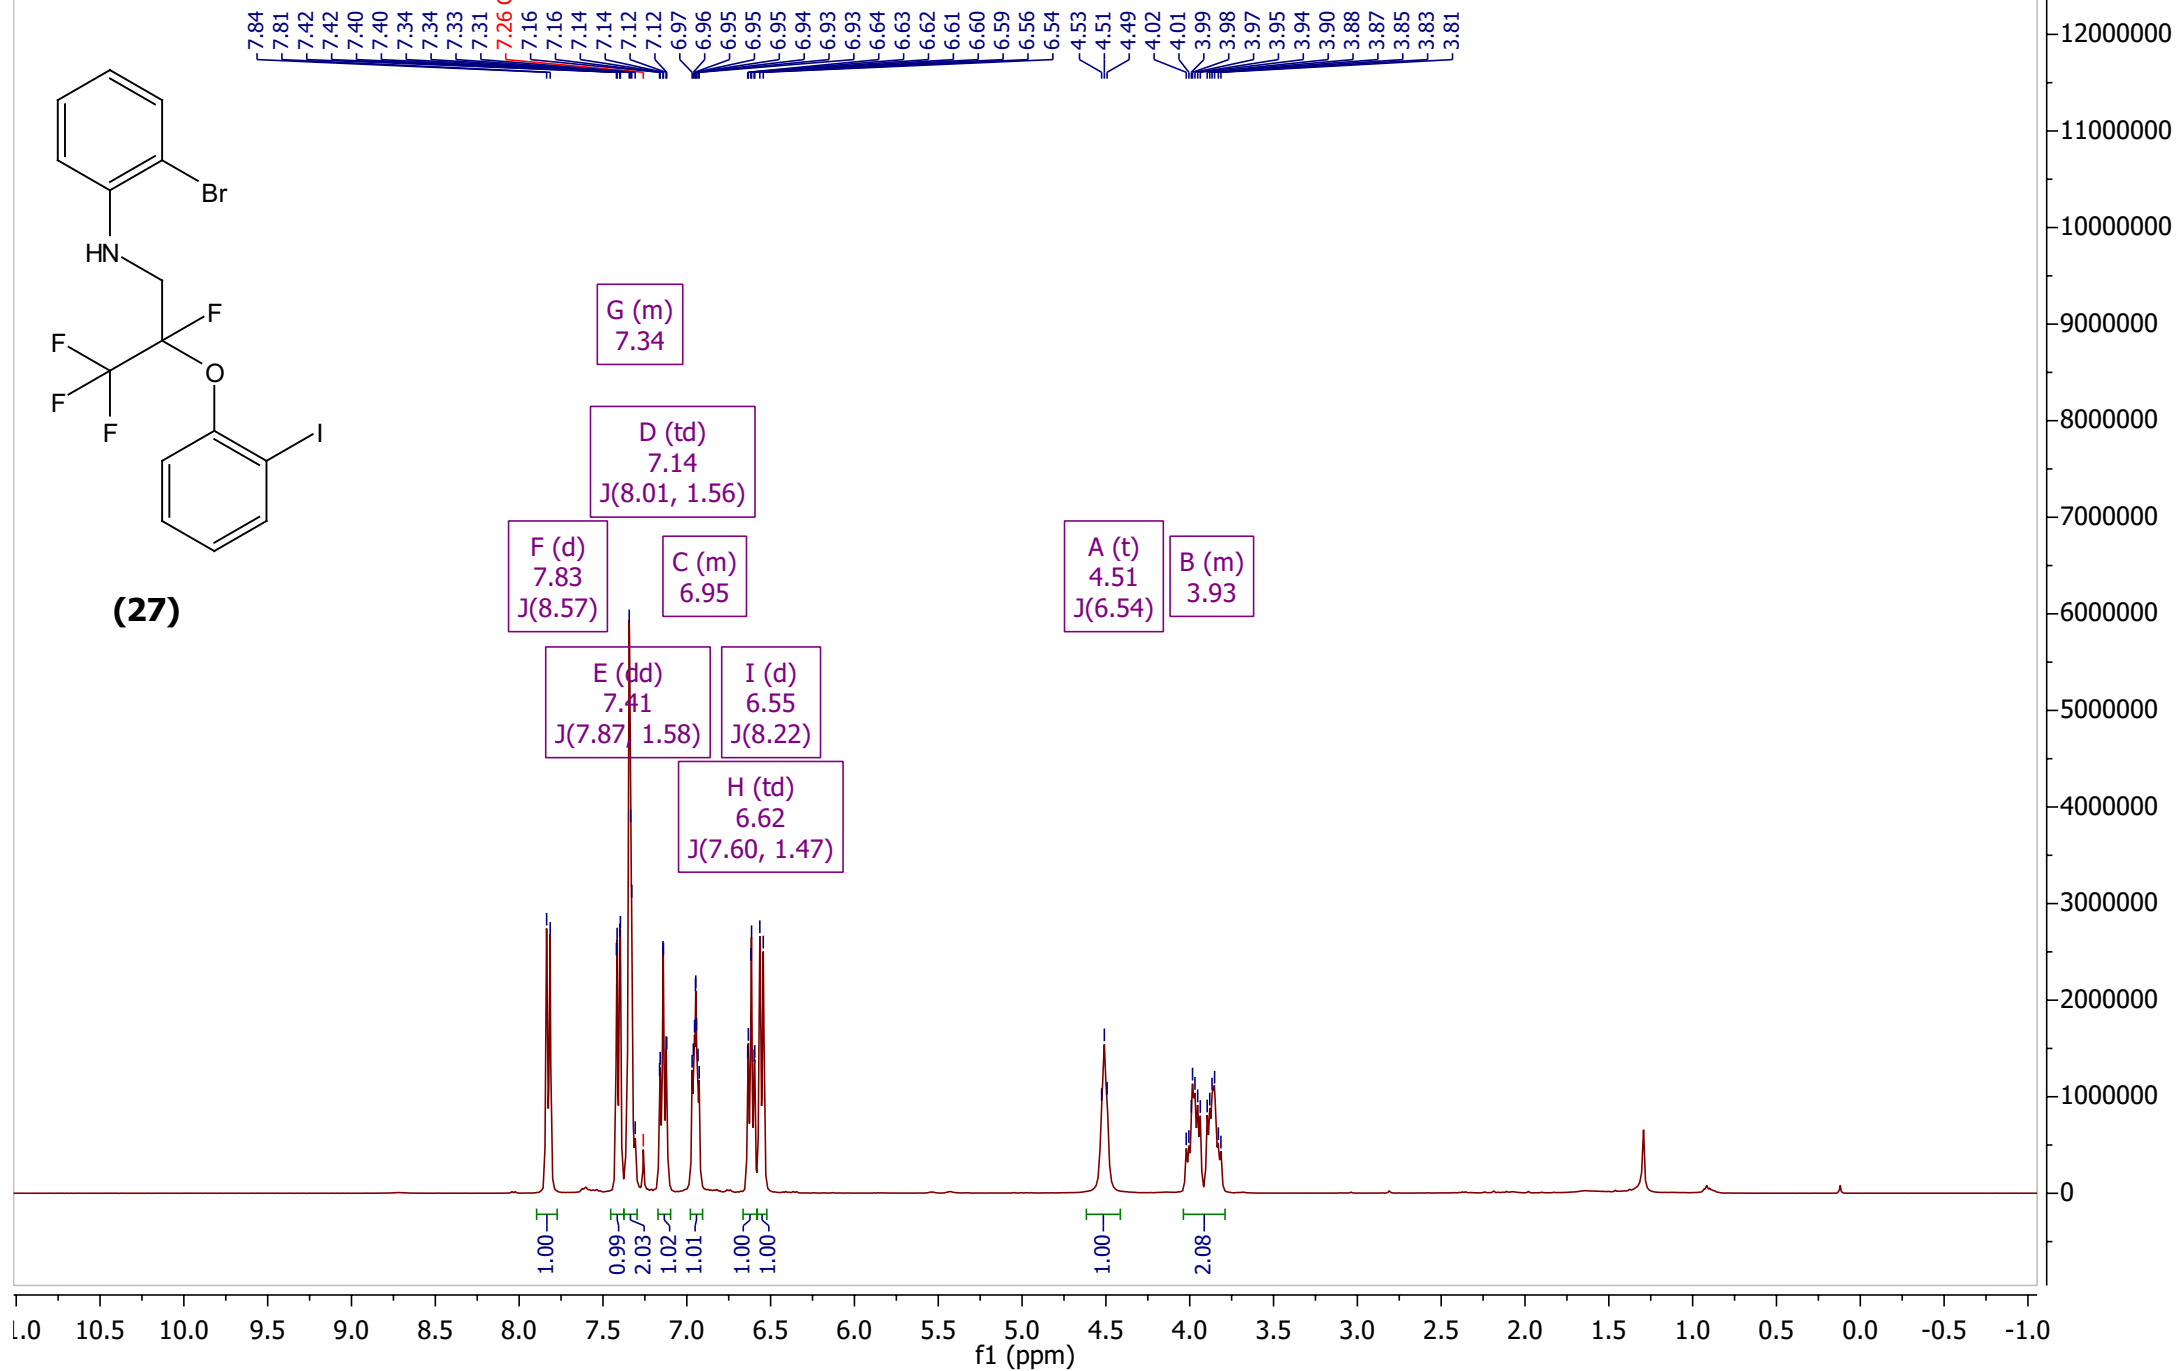

$^{19}\text{F}$  NMR (376 MHz, Chloroform-*d*)  $\delta$  -80.6 (d,  $J = 2.8$  Hz), -122.3 (q,  $J = 2.7$  Hz).

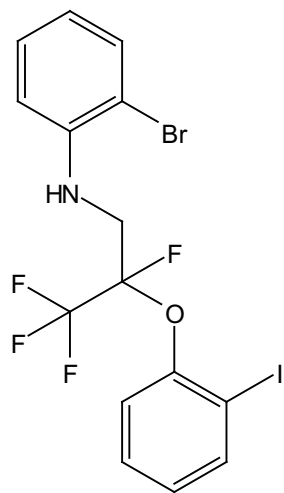

**(27)**

-80.57  
-80.57

-122.32  
-122.33  
-122.34  
-122.34

B (d)  
-80.57  
J(2.75)

A (q)  
-122.33  
J(2.71)

3.00

1.00

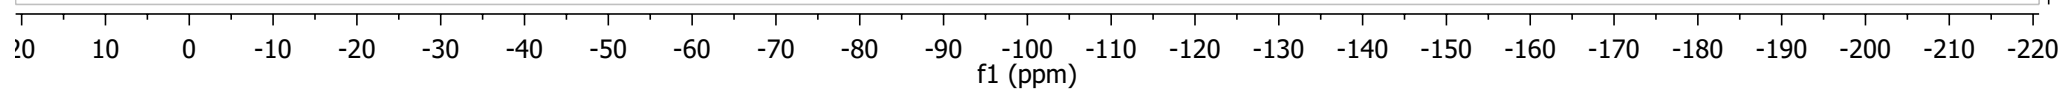

$^{13}\text{C}$  NMR (101 MHz, Chloroform-*d*)  $\delta$  151.9 (d,  $J = 2.3$  Hz), 143.4, 140.3, 132.7, 129.8, 128.5, 127.4, 122.1 (d,  $J = 3.3$  Hz), 120.4 (qd,  $J = 287.6, 36.3$  Hz), 119.1, 111.3 (d,  $J = 1.6$  Hz), 110.2, 109.0 (dq,  $J = 242.1, 33.6$  Hz), 90.3 (d,  $J = 3.1$  Hz), 44.3 (d,  $J = 28.5$  Hz).

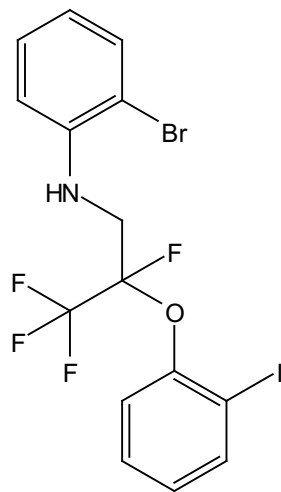

(27)

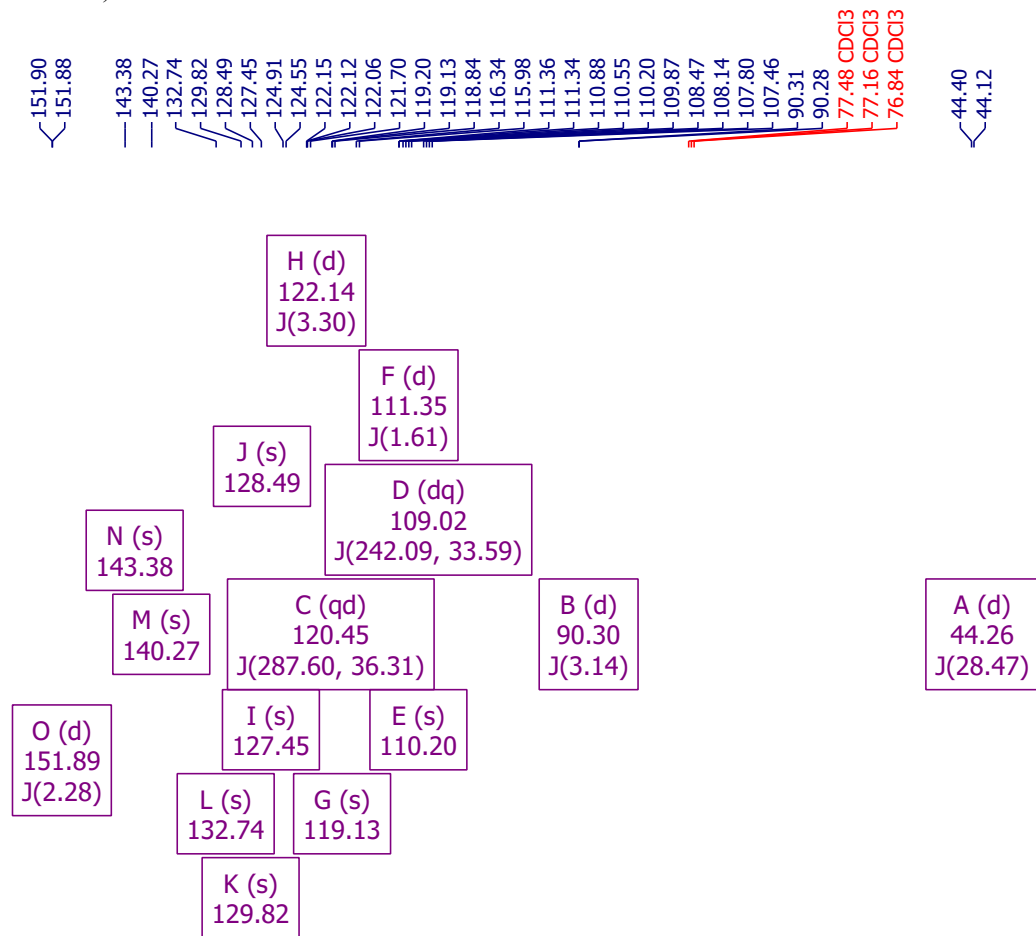

210 200 190 180 170 160 150 140 130 120 110 100 90 80 70 60 50 40 30 20 10 0 -10  
f1 (ppm)

$^1\text{H}$  NMR (400 MHz, Chloroform-*d*)  $\delta$  7.85 (t,  $J = 8.3$  Hz, 2H), 7.81 (d,  $J = 7.5$  Hz, 1H), 7.68 (s, 1H), 7.52 (pd,  $J = 7.0, 1.6$  Hz, 2H), 7.37 (d,  $J = 9.4$  Hz, 1H), 7.05 – 6.92 (m, 2H), 6.73 – 6.61 (m, 2H), 4.19 (s, 1H), 3.96 – 3.78 (m, 2H).

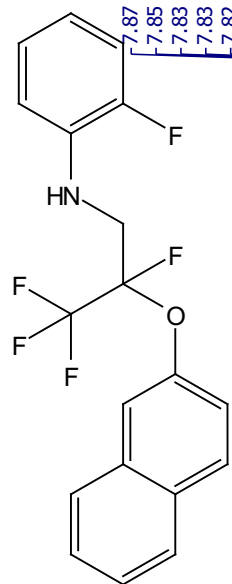

**(28)**

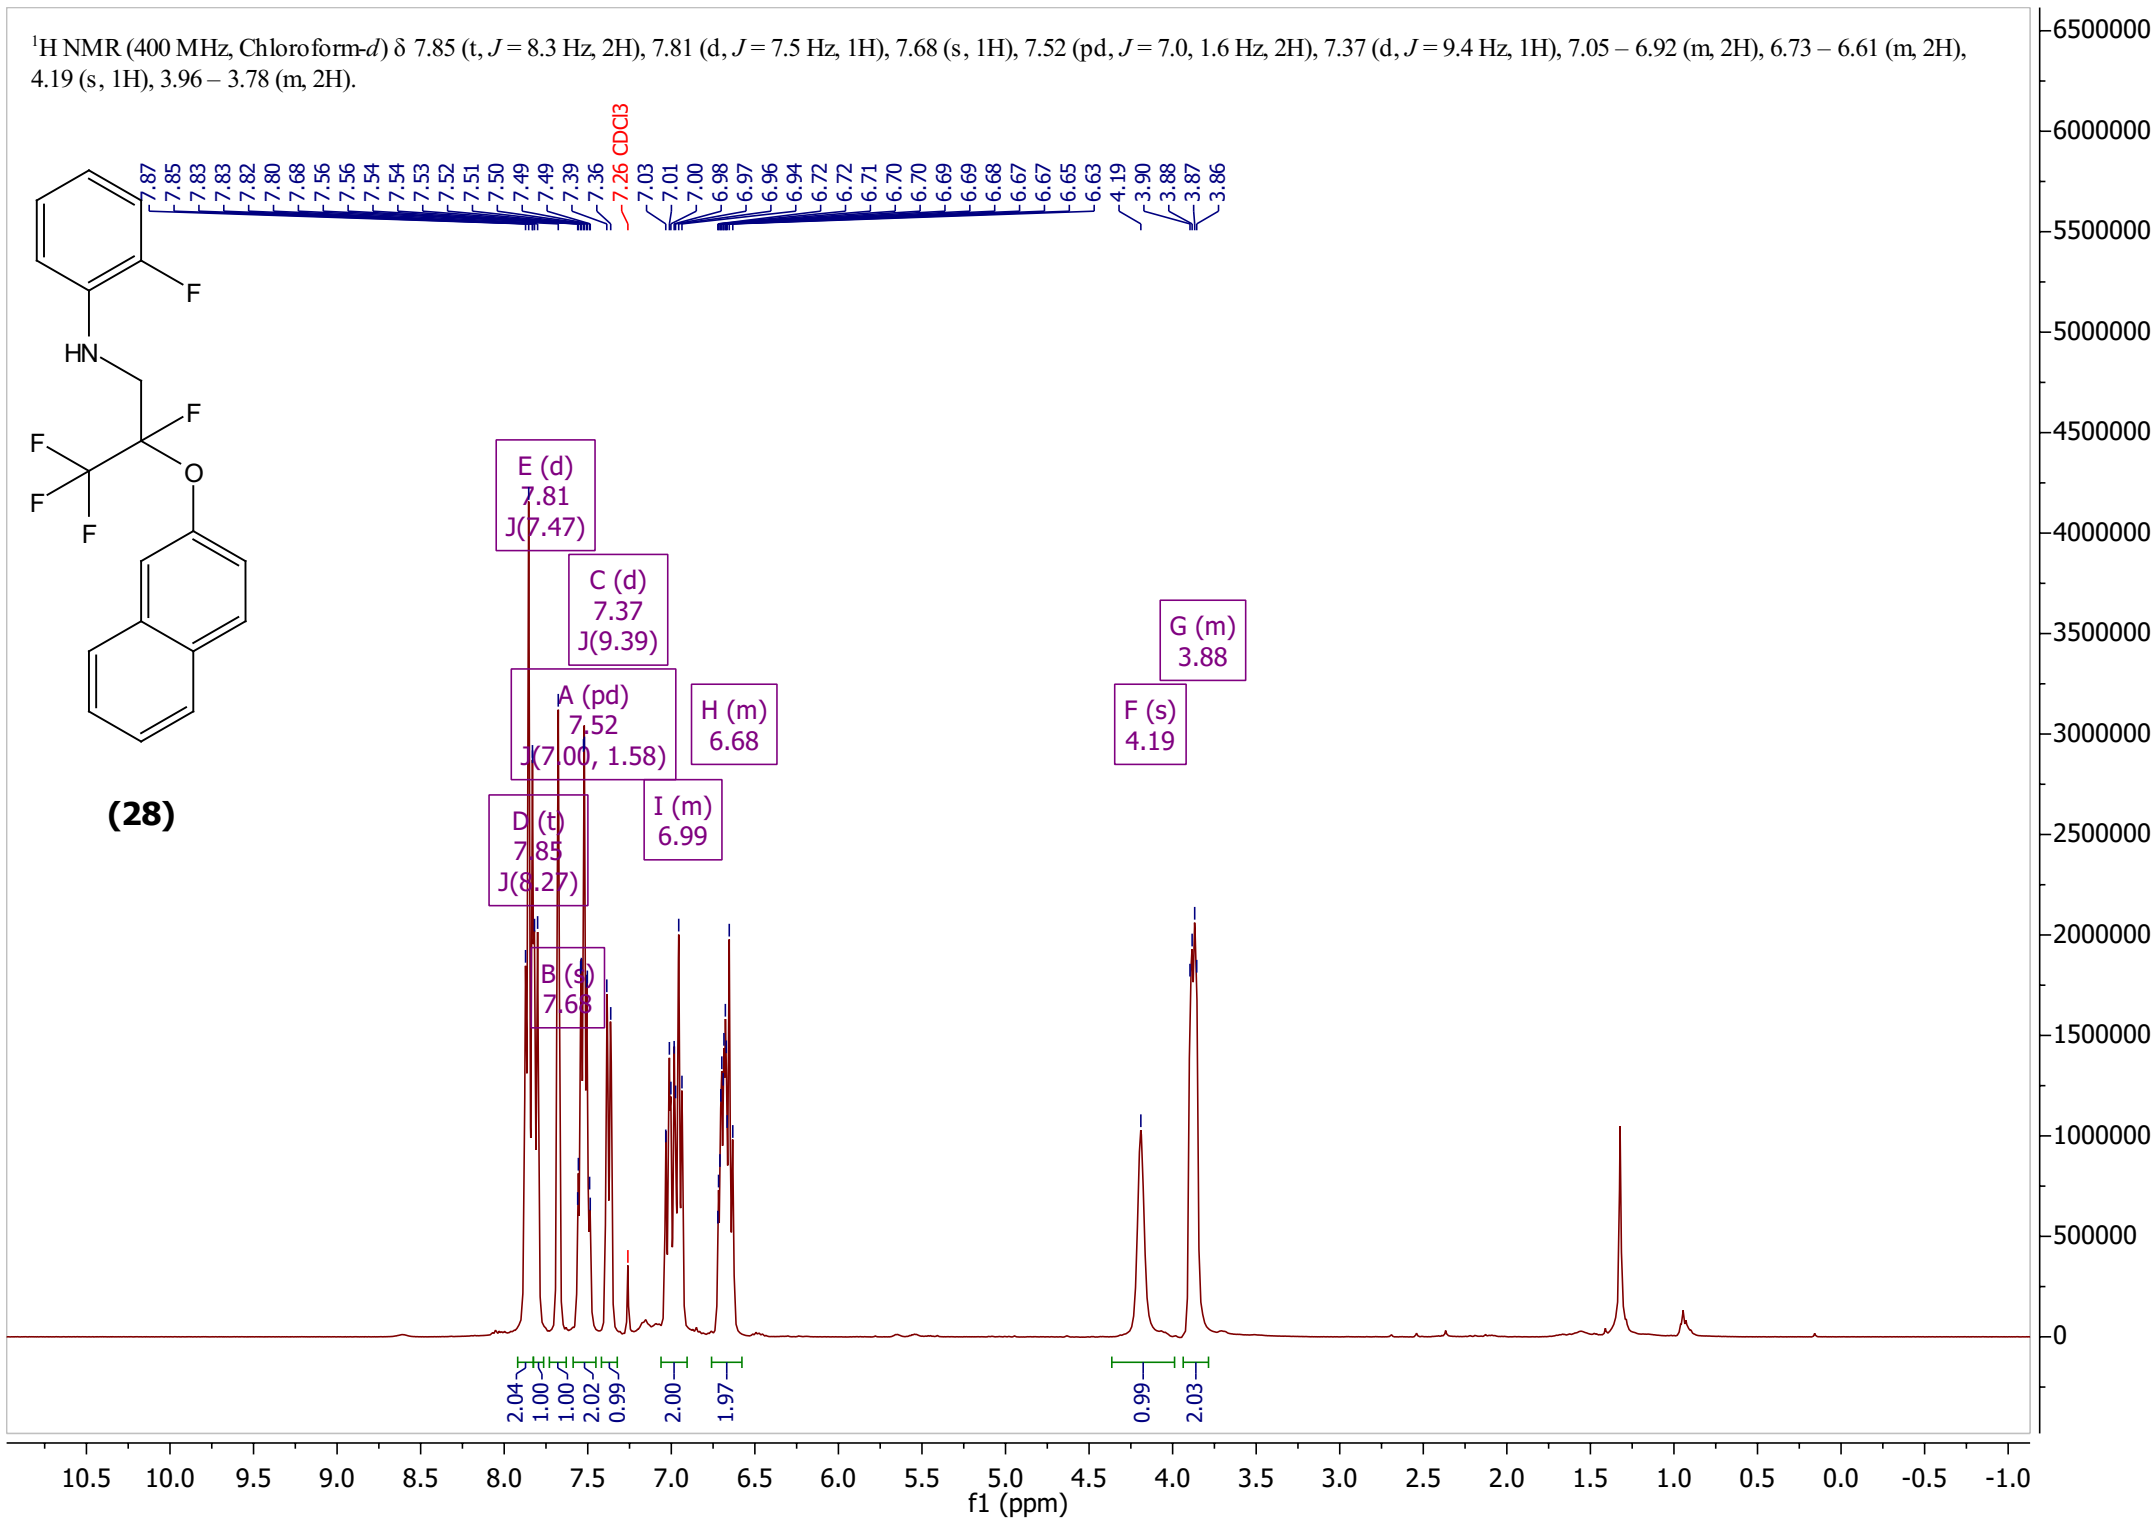

$^{19}\text{F}$  NMR (376 MHz, Chloroform-*d*)  $\delta$  -80.3 (d,  $J = 2.9$  Hz), -124.3 (q,  $J = 2.9$  Hz), -136.4.

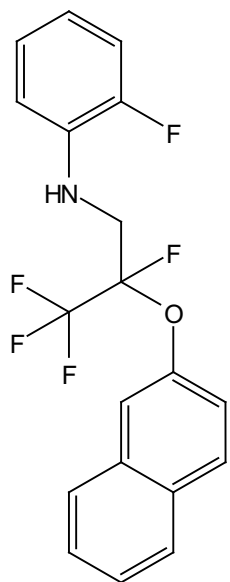

**(28)**

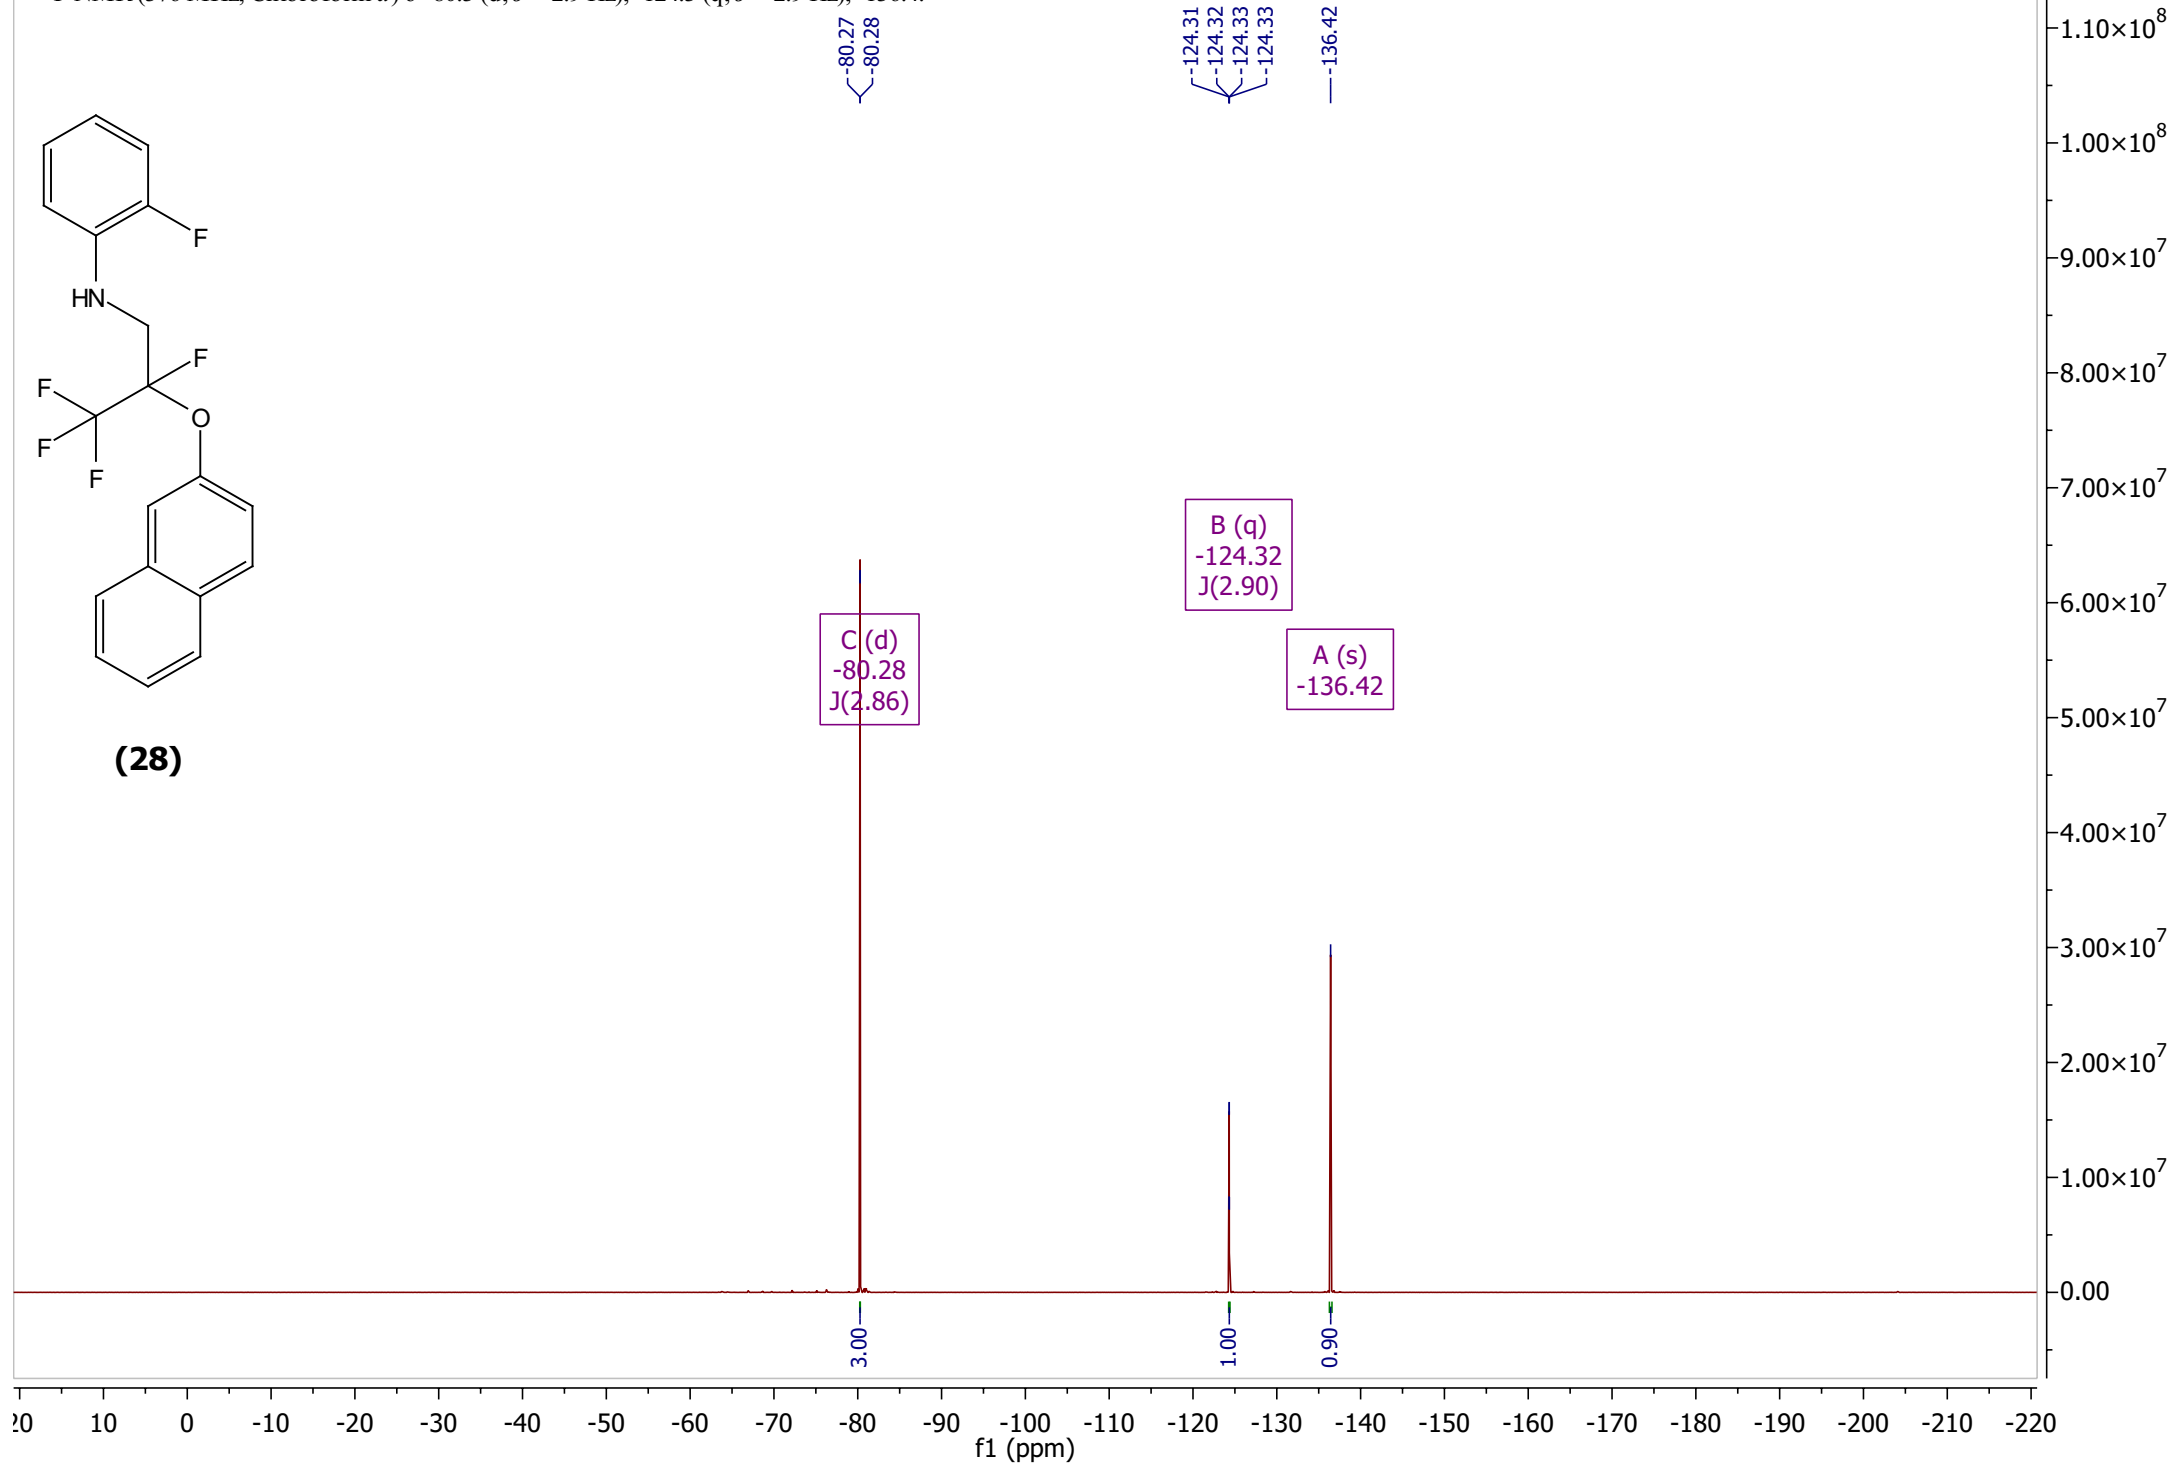

$^{13}\text{C}$  NMR (101 MHz, Chloroform-*d*)  $\delta$  151.8 (d,  $J = 238.7$  Hz), 149.2, 135.2 (d,  $J = 11.2$  Hz), 133.9, 131.6, 130.0, 127.9, 127.8, 127.0, 126.1, 124.6 (d,  $J = 3.6$  Hz), 121.6 (d,  $J = 2.3$  Hz), 120.8 (qd,  $J = 287.9, 37.6$  Hz), 119.2 (d,  $J = 2.3$  Hz), 118.2 (d,  $J = 7.0$  Hz), 114.9 (d,  $J = 18.6$  Hz), 112.6 (d,  $J = 2.9$  Hz), 108.9 (dq,  $J = 239.3, 33.1$  Hz), 44.5 (d,  $J = 30.1$  Hz).

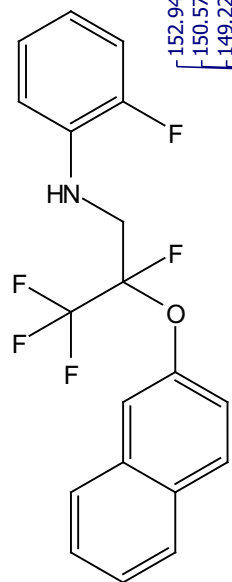

**(28)**

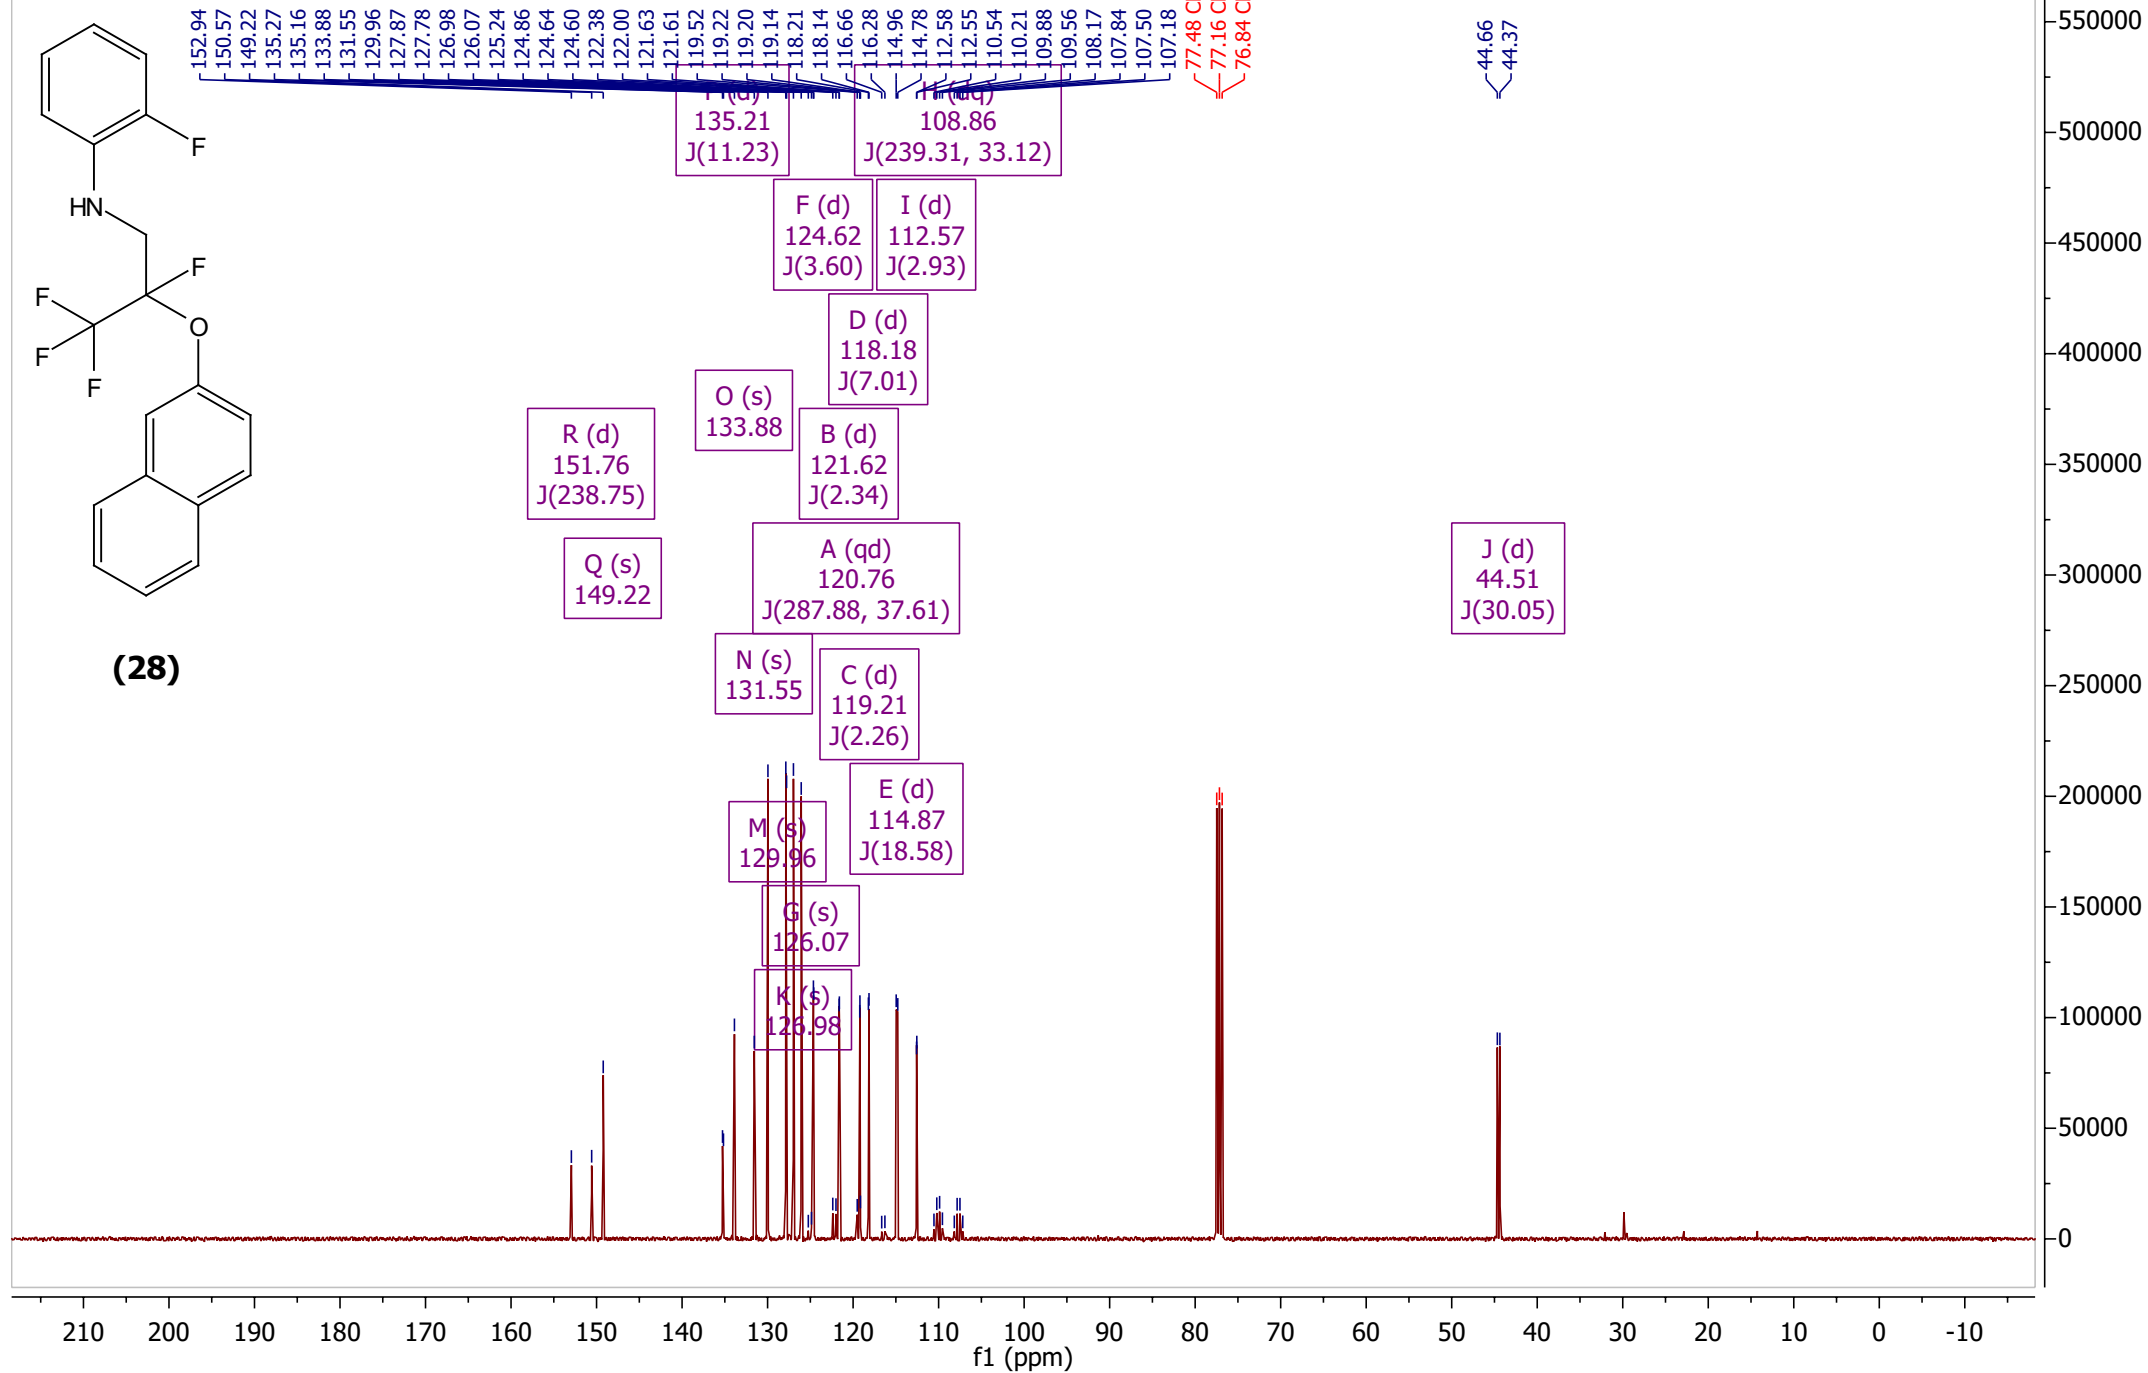



<sup>1</sup>H NMR (400 MHz, Chloroform-*d*) δ 8.26 (d, *J* = 7.9 Hz, 1H), 7.93 – 7.89 (m, 1H), 7.77 (d, *J* = 7.6 Hz, 1H), 7.61 (qt, *J* = 6.8, 3.5 Hz, 2H), 7.52 – 7.41 (m, 2H), 7.08 (t, *J* = 7.6 Hz, 1H), 7.01 (d, *J* = 7.3 Hz, 1H), 6.70 (t, *J* = 7.4 Hz, 1H), 6.50 (d, *J* = 8.1 Hz, 1H), 4.03 – 3.84 (m, 2H), 3.46 (s, 1H), 1.90 (s, 3H).

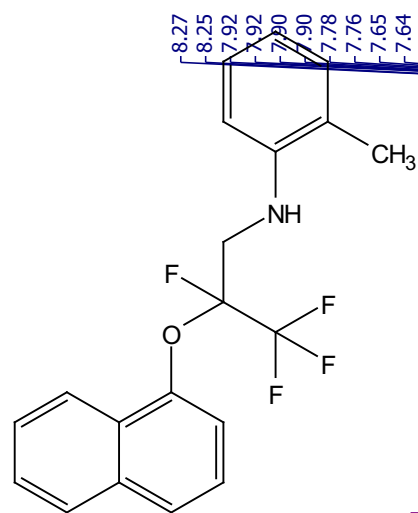

**(29)**

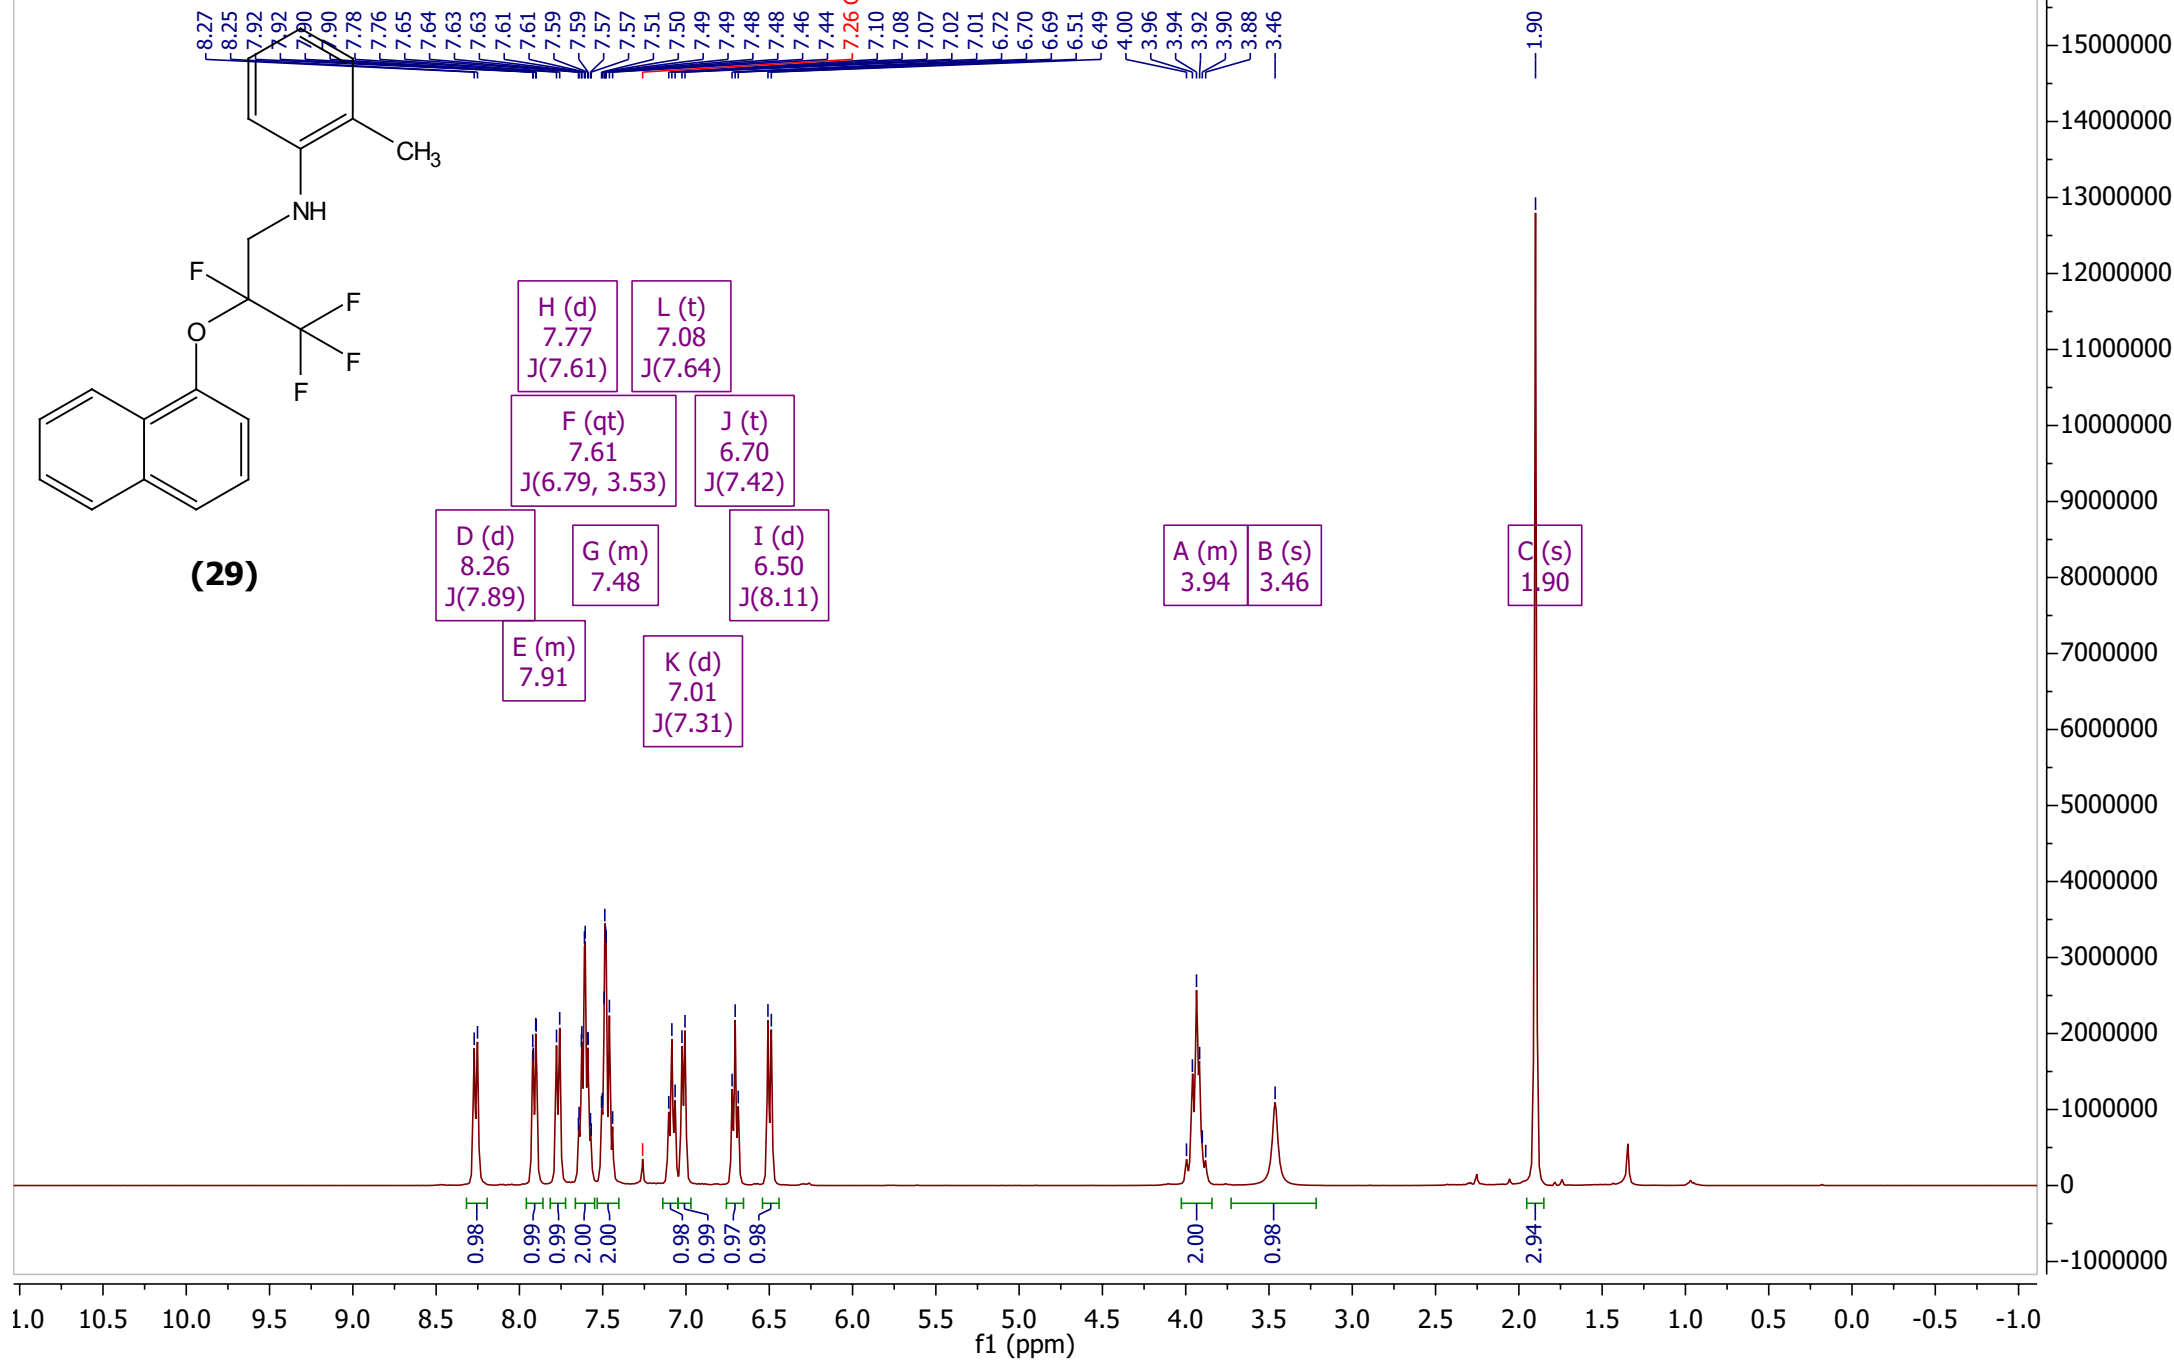

$^{19}\text{F}$  NMR (376 MHz, Chloroform-*d*)  $\delta$  -81.1 (d,  $J = 2.4$  Hz), -120.5 (q,  $J = 3.0$  Hz).

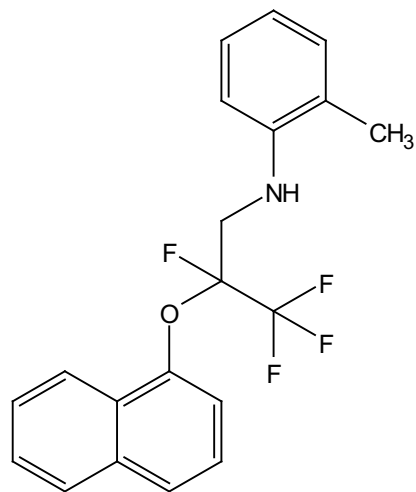

**(29)**

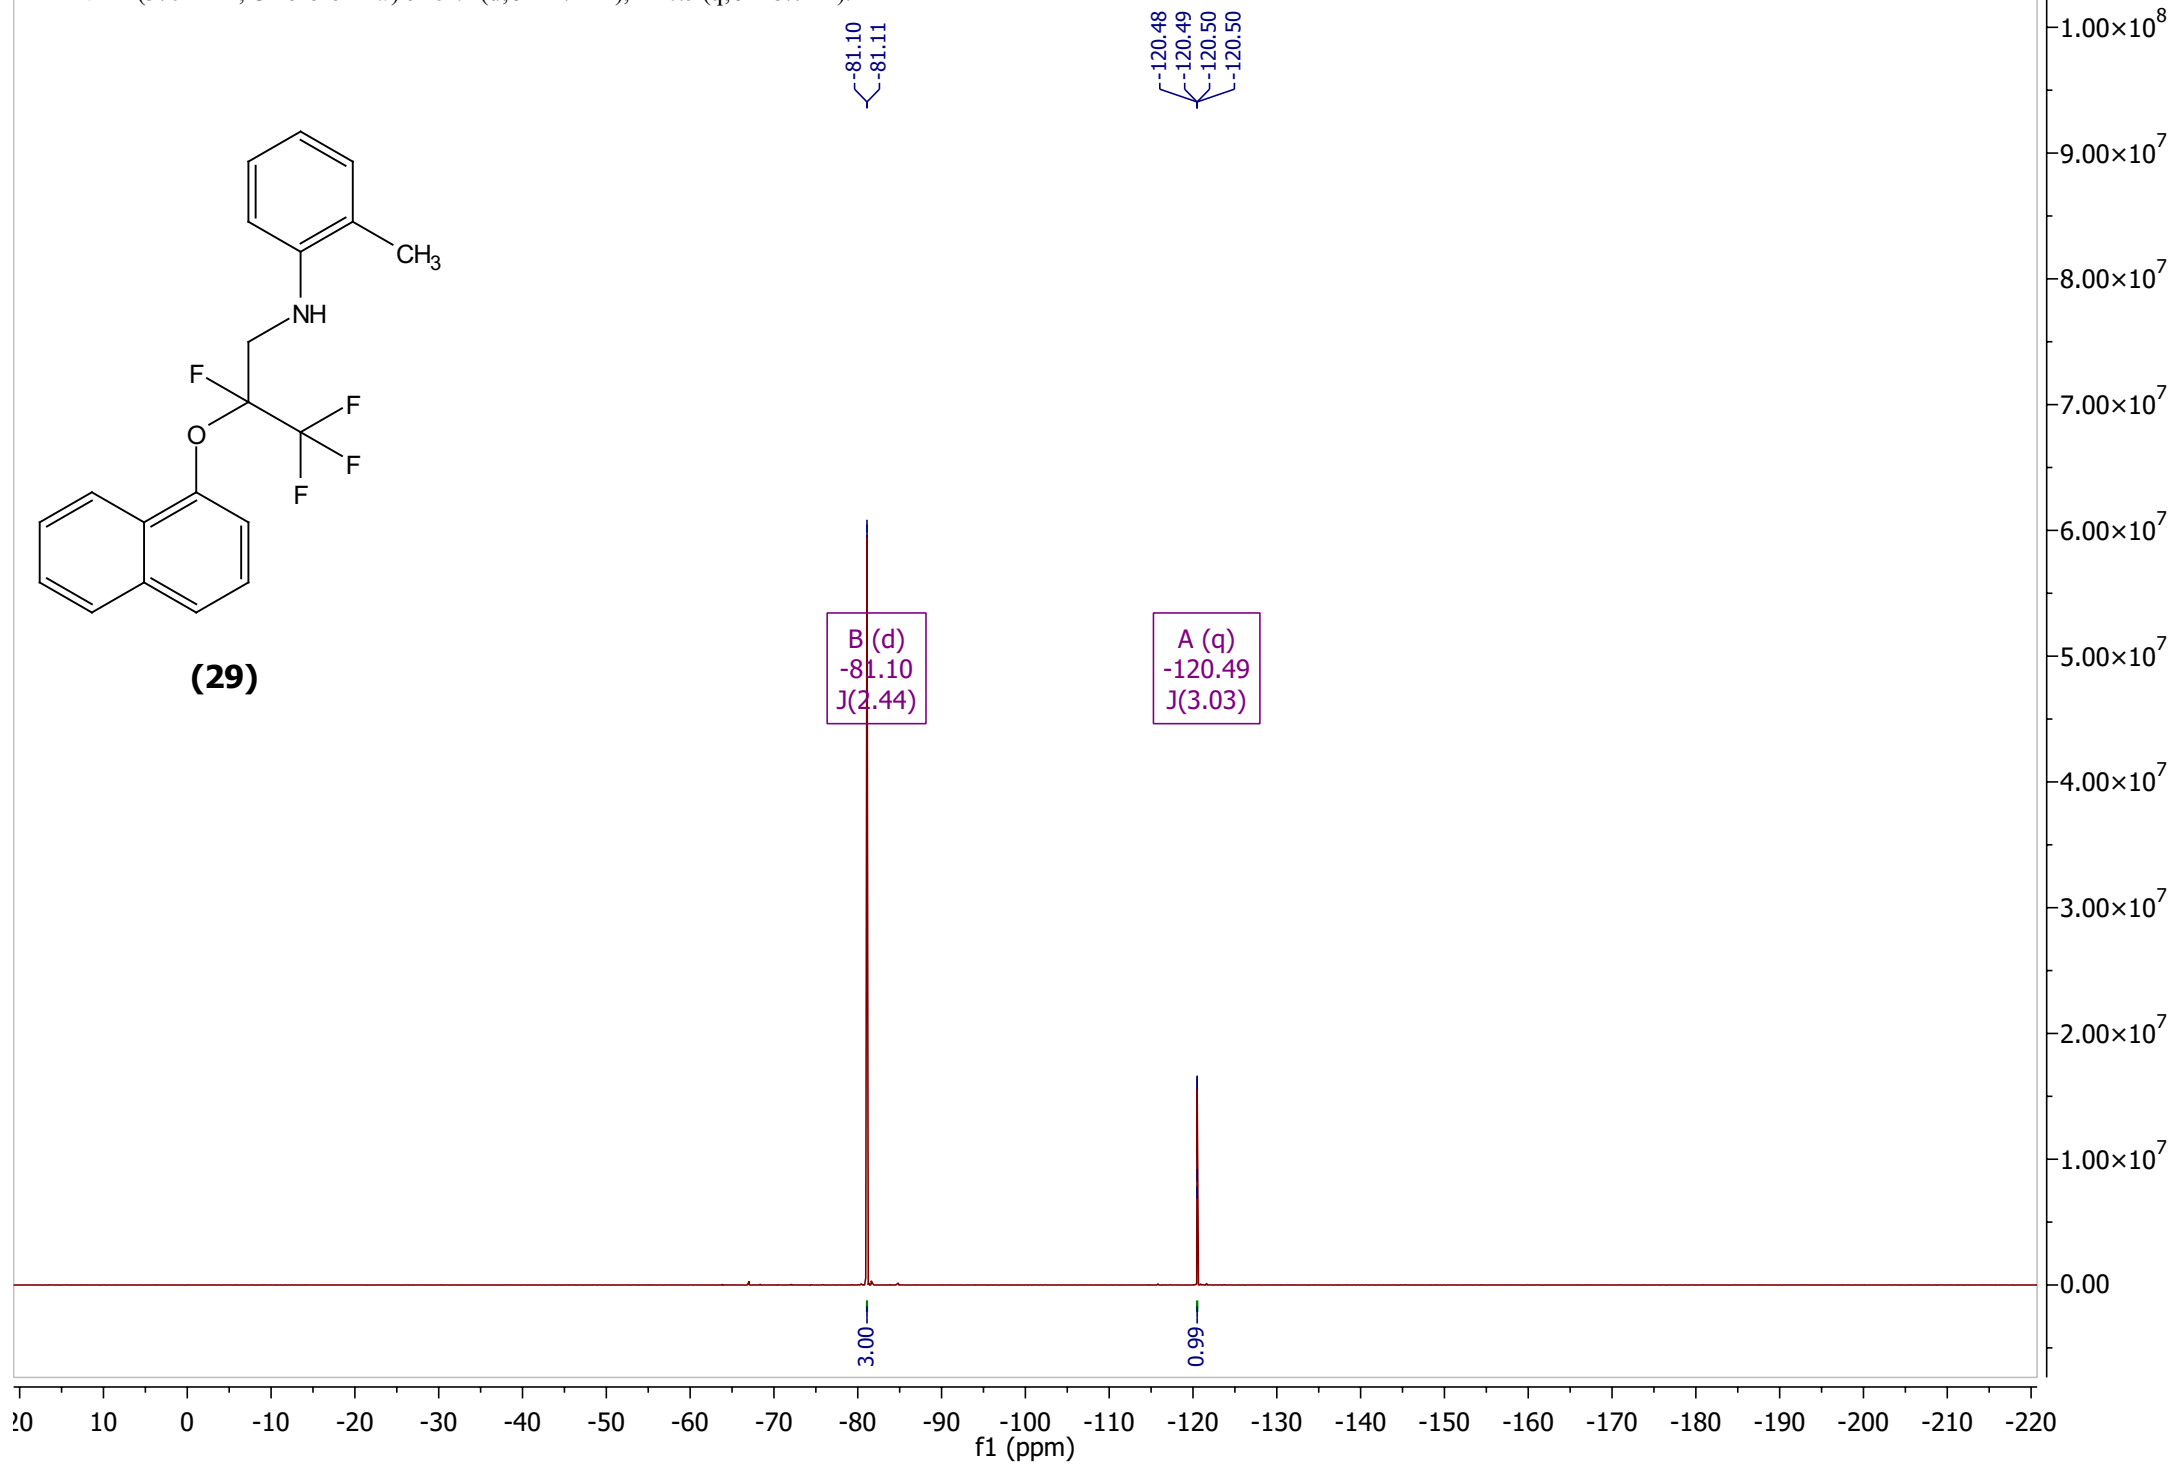

<sup>13</sup>C NMR (101 MHz, Chloroform-*d*) δ 147.4 (d, *J* = 2.0 Hz), 144.4, 134.9, 130.4, 128.1, 127.5 (d, *J* = 2.1 Hz), 127.1, 127.1, 127.0, 126.0, 125.6, 122.6, 121.5, 121.0 (qd, *J* = 287.1, 36.3 Hz), 118.3, 117.1 (d, *J* = 2.7 Hz), 109.9, 109.5 (dq, *J* = 239.1, 33.4 Hz), 43.6 (d, *J* = 31.8 Hz), 17.1.

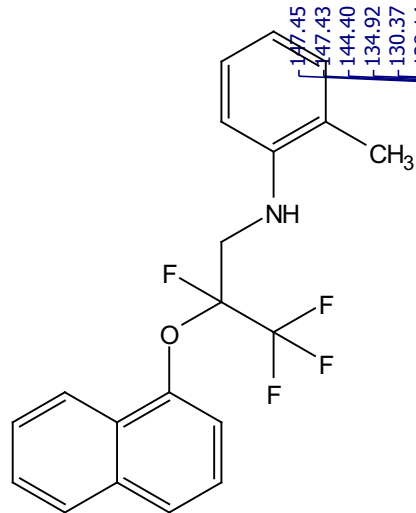

**(29)**

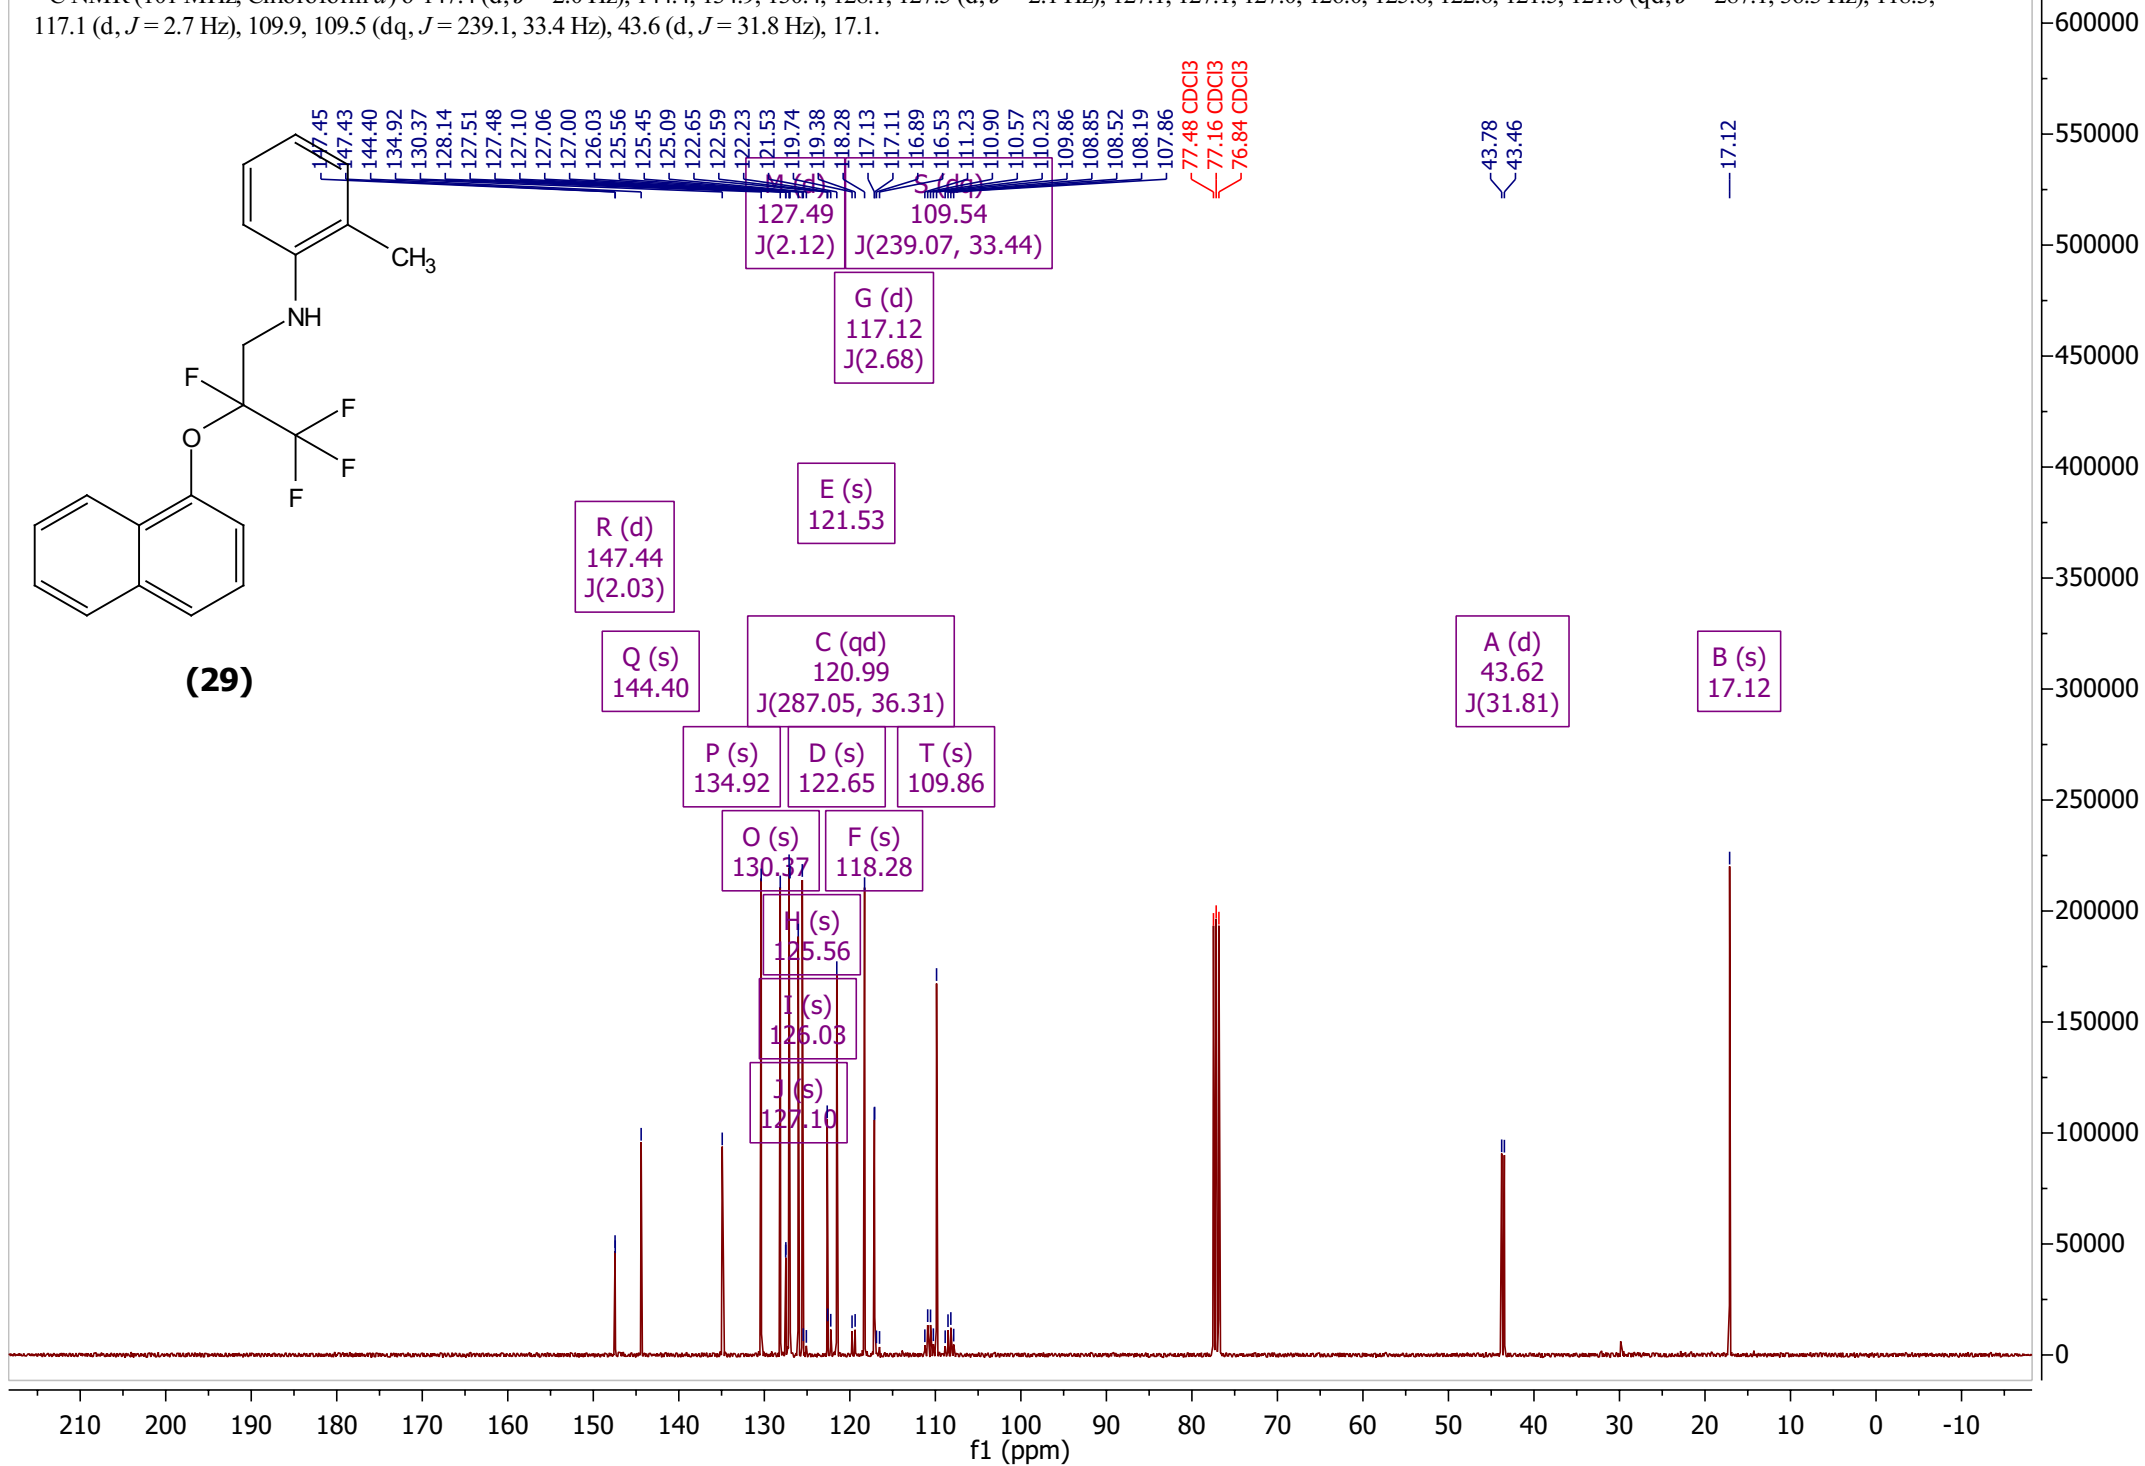

$^1\text{H NMR}$  (400 MHz, Chloroform- $d$ )  $\delta$  9.84 (s, 1H), 7.71 (d,  $J = 8.5$  Hz, 2H), 7.20 – 7.09 (m, 4H), 6.76 – 6.64 (m, 3H), 3.94 – 3.81 (m, 2H), 2.94 (s, 3H).

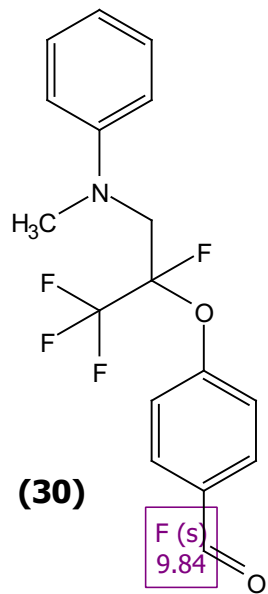

9.84

7.72  
7.70  
7.18  
7.17  
7.17  
7.15  
7.14  
7.13  
7.12  
6.72  
6.70  
6.68

3.92  
3.88  
3.87  
3.83

2.94

A (d)  
7.71  
J(8.54)

C (m)  
7.16

B (m)  
6.71

E (m)  
3.89

D (s)  
2.94

1.00

2.02

4.01

3.01

2.03

3.02

f1 (ppm)

21000000  
20000000  
19000000  
18000000  
17000000  
16000000  
15000000  
14000000  
13000000  
12000000  
11000000  
10000000  
9000000  
8000000  
7000000  
6000000  
5000000  
4000000  
3000000  
2000000  
1000000  
0  
-1000000

$^{19}\text{F}$  NMR (376 MHz, Chloroform-*d*)  $\delta$  -79.9 (d,  $J = 2.7$  Hz), -126.9 (q,  $J = 2.9$  Hz).

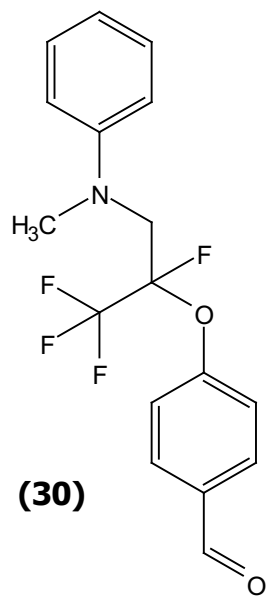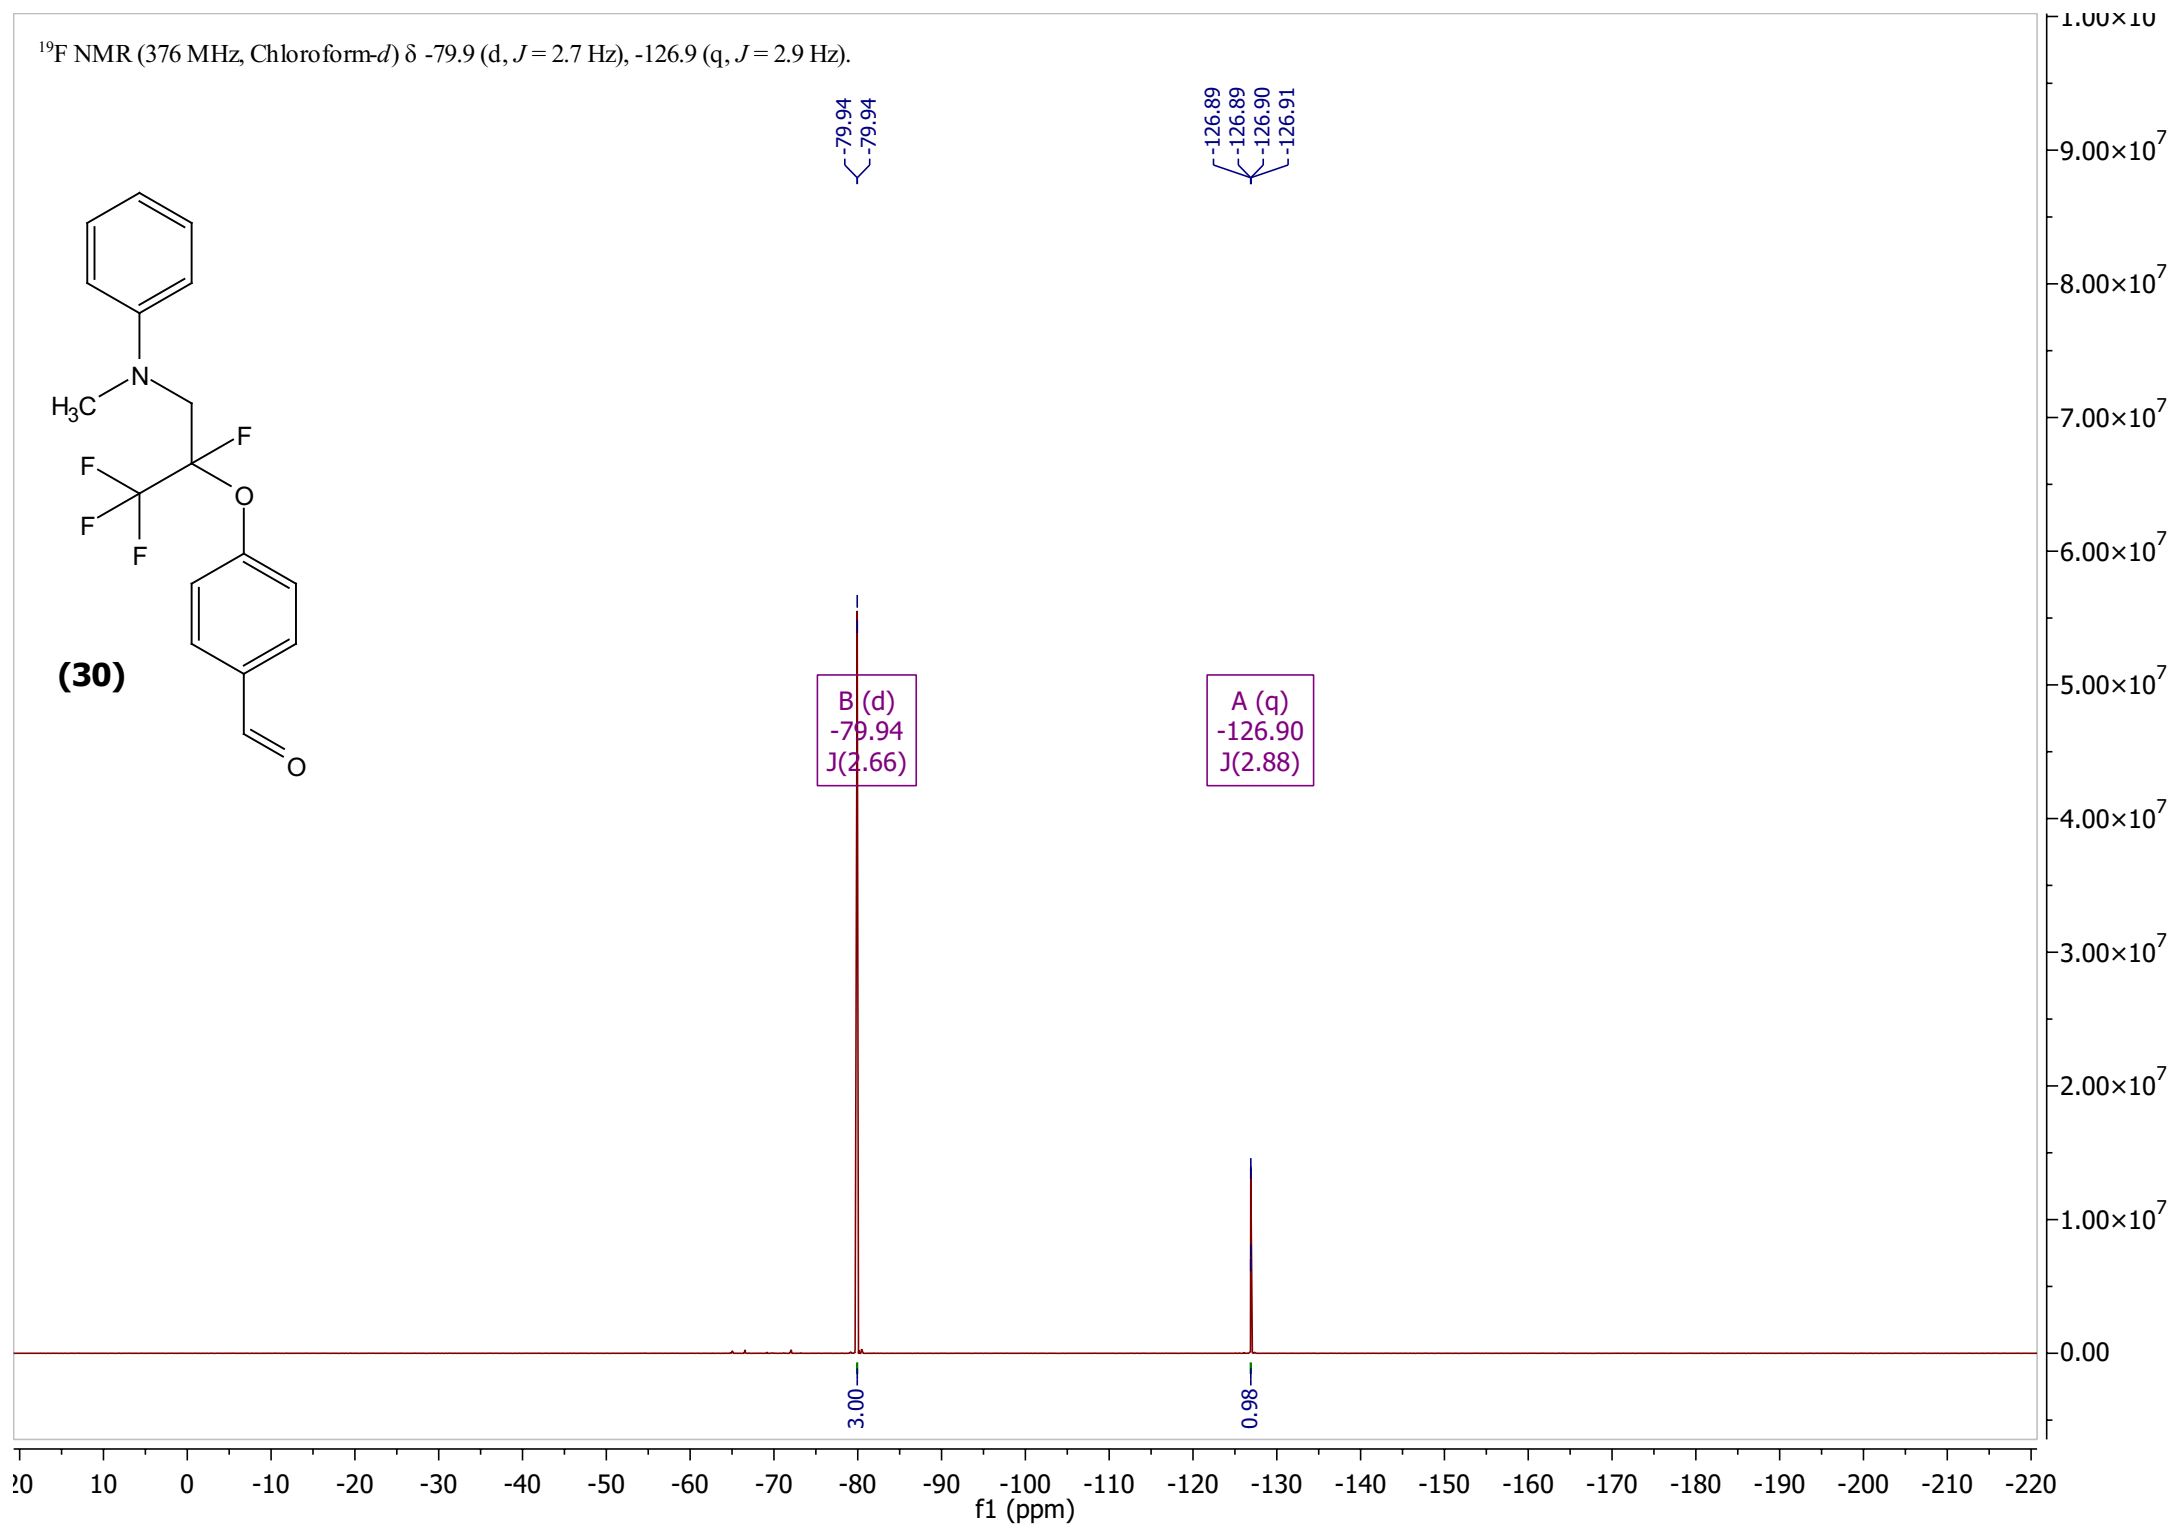

$^{13}\text{C}$  NMR (101 MHz, Chloroform-*d*)  $\delta$  190.9, 157.1, 149.2, 133.7, 131.3, 129.2, 122.3 (d,  $J = 2.9$  Hz), 120.6 (qd,  $J = 289.2, 39.0$  Hz), 118.1, 112.9, 109.9 (dq,  $J = 244.6, 32.5$  Hz), 54.5 (d,  $J = 22.7$  Hz), 40.1 (d,  $J = 1.4$  Hz).

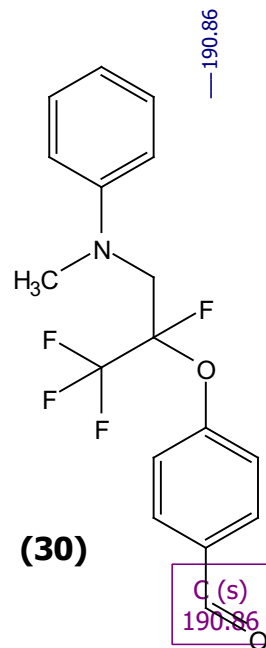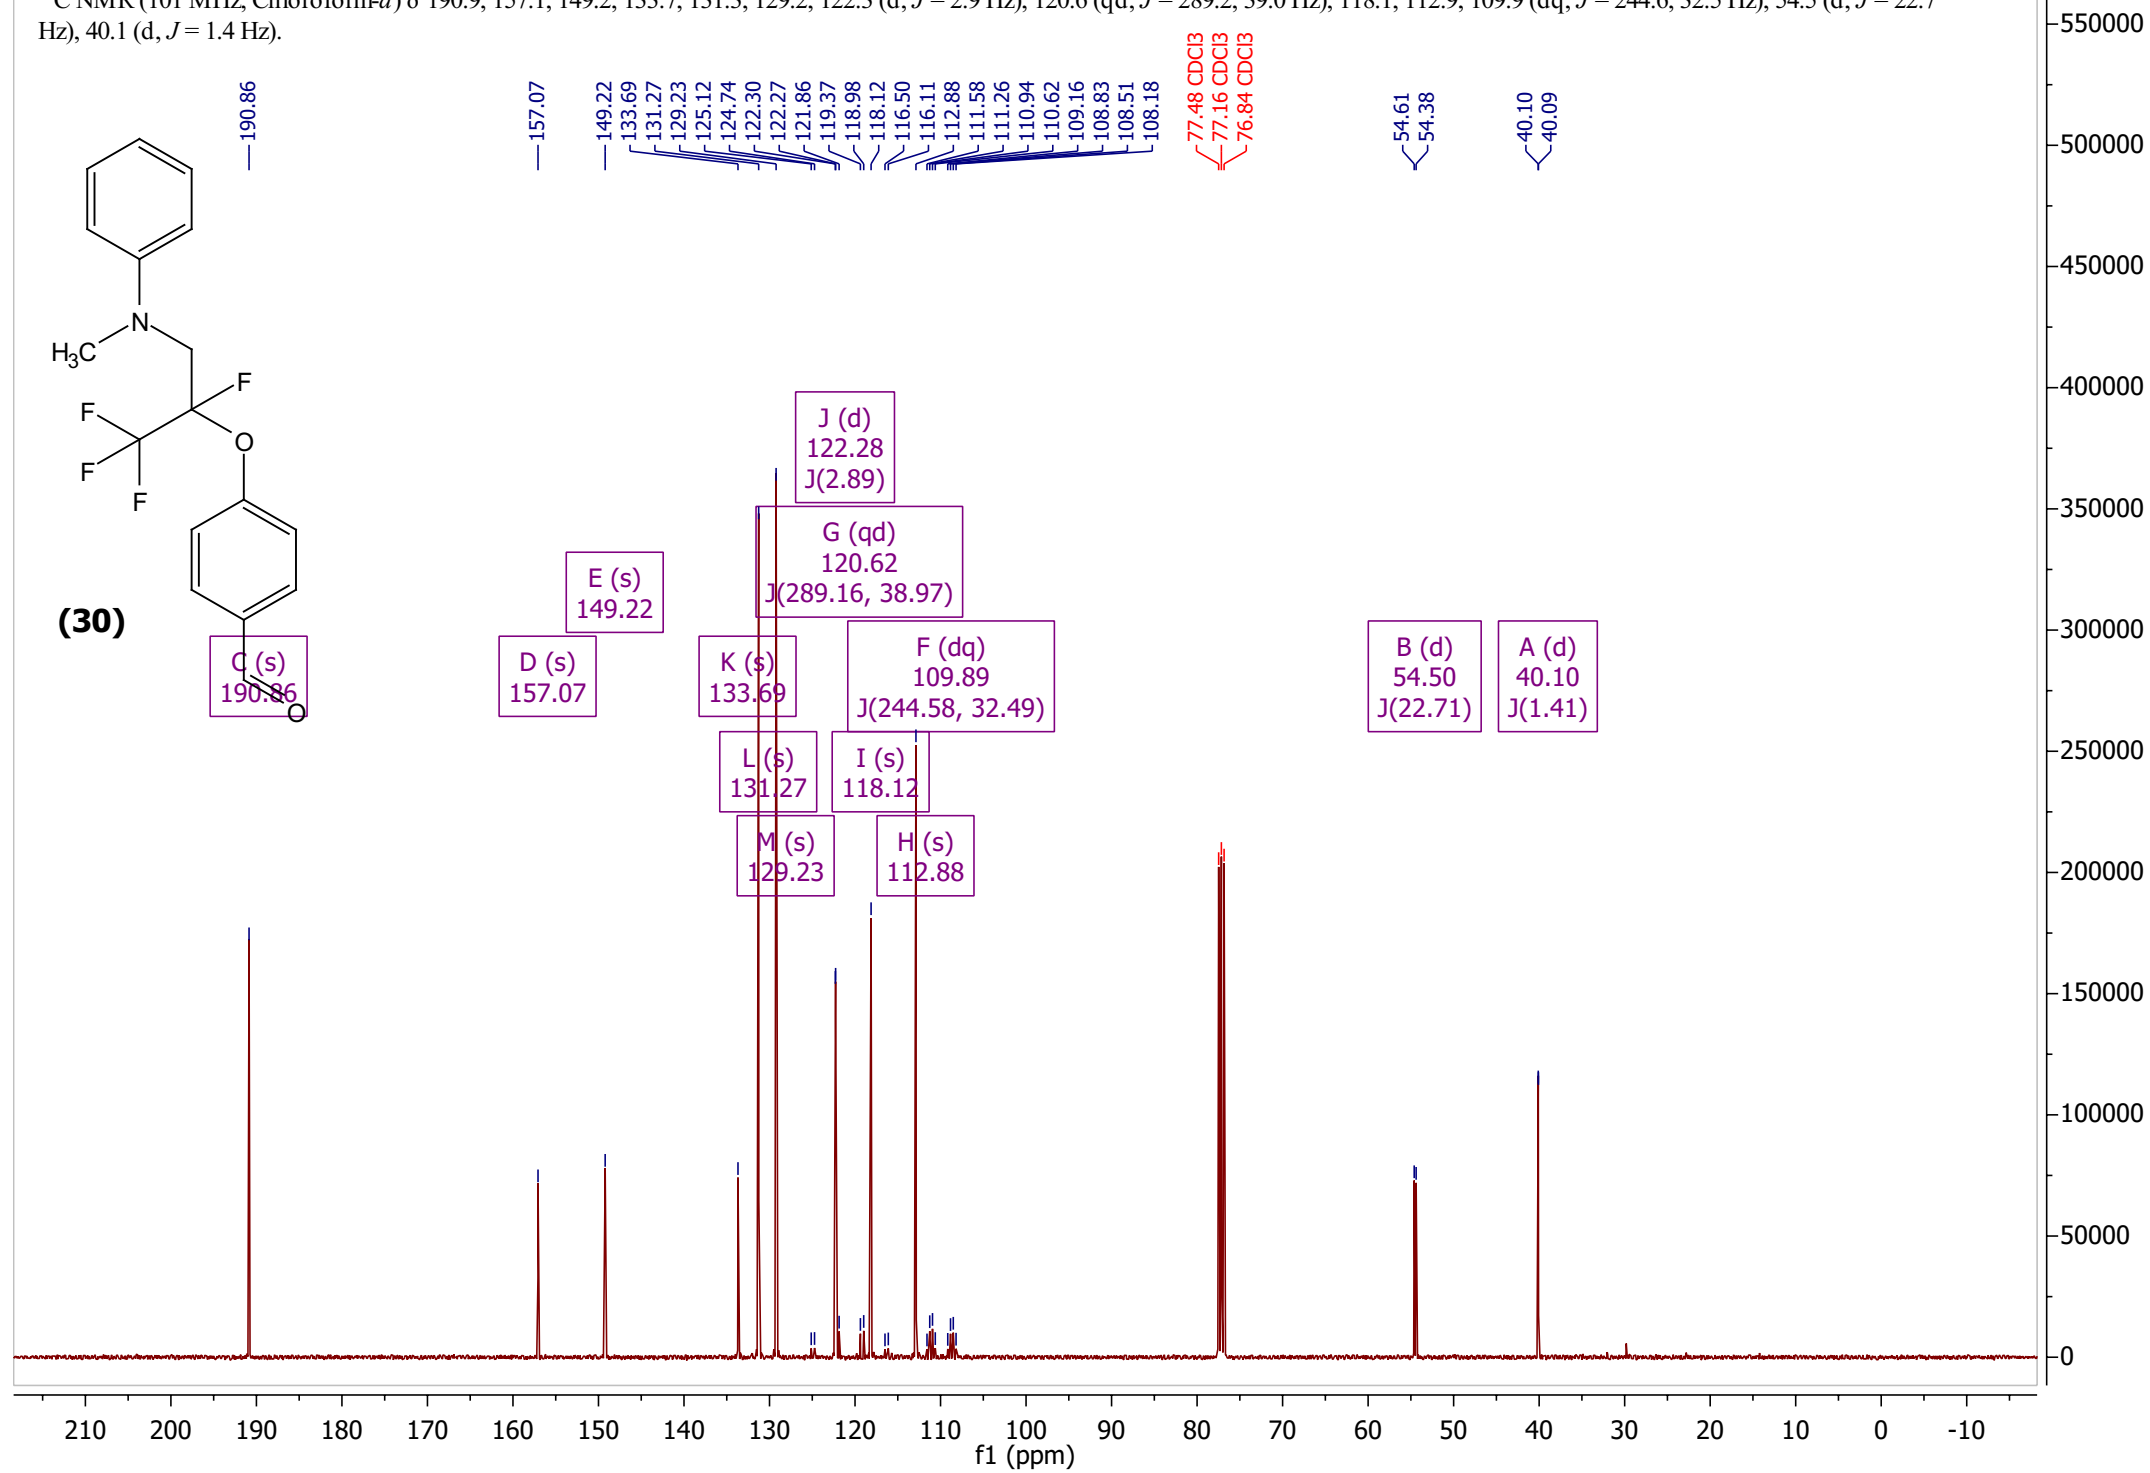

$^1\text{H NMR}$  (400 MHz, Chloroform- $d$ )  $\delta$  7.91 (dd,  $J = 8.2, 1.8$  Hz, 1H), 7.59 (td,  $J = 8.4, 8.0, 1.7$  Hz, 1H), 7.51 (dt,  $J = 8.0, 1.5$  Hz, 1H), 7.39 – 7.29 (m, 3H), 6.91 – 6.83 (m, 3H), 4.19 (dd,  $J = 16.2, 12.8$  Hz, 1H), 4.09 (dd,  $J = 20.4, 16.2$  Hz, 1H), 3.10 (s, 3H).

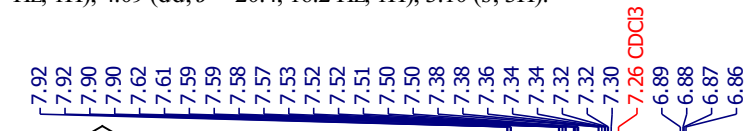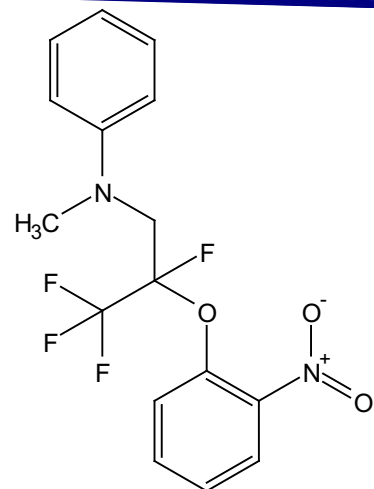

G (m)  
7.34

E (td)  
7.59  
J(8.40, 7.95, 1.71)

D (dd)  
7.91  
J(8.17, 1.81)

C (m)  
6.87

F (dt)  
7.51  
J(7.97, 1.53)

B (dd)  
4.19  
J(16.23, 12.78)

A (dd)  
4.09  
J(20.37, 16.24)

H (s)  
3.10

0.94 1.00 1.08 3.08 3.00 0.99 1.00 2.99

f1 (ppm)

$^{19}\text{F}$  NMR (376 MHz, Chloroform-*d*)  $\delta$  -80.2 (d,  $J = 2.6$  Hz), -124.8 (q,  $J = 2.8$  Hz).

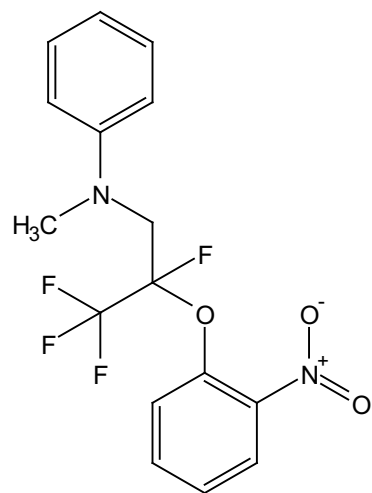

**(31)**

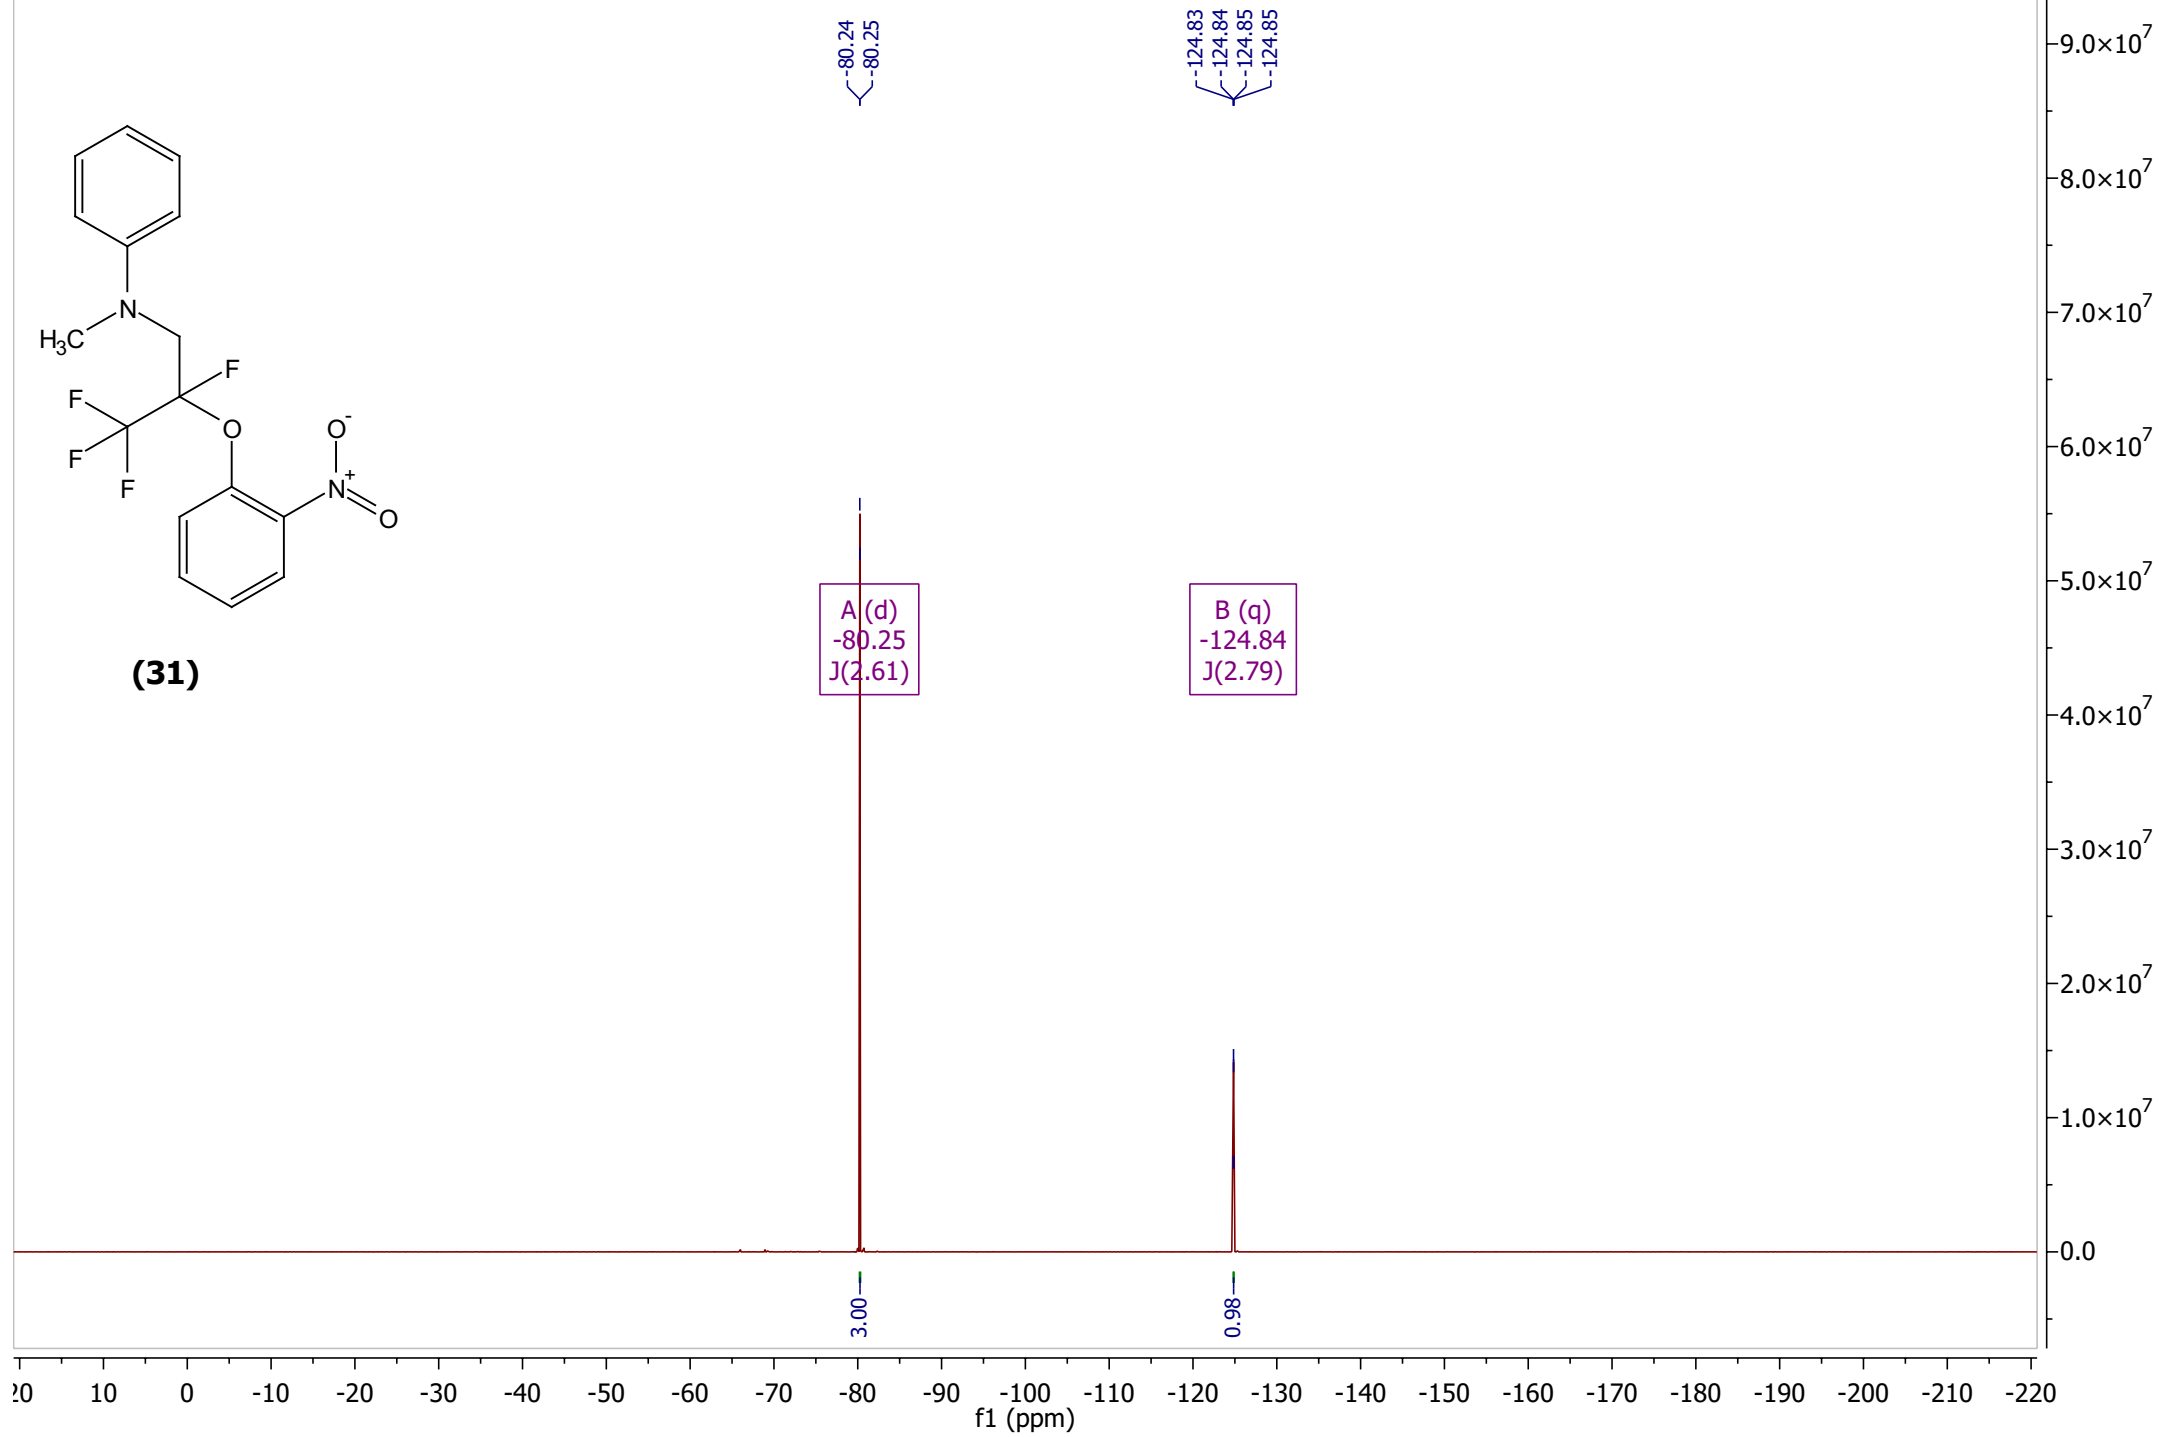



$^{13}\text{C}$  NMR (101 MHz, Chloroform-*d*)  $\delta$  149.1, 145.0, 143.0, 133.8, 129.2, 125.9, 125.5, 124.2 (d,  $J = 3.9$  Hz), 120.3 (qd,  $J = 288.9, 38.5$  Hz), 118.1, 112.9 (d,  $J = 1.4$  Hz), 110.6 (dq,  $J = 246.5, 33.1$  Hz), 54.1 (d,  $J = 21.8$  Hz), 40.2 (d,  $J = 1.5$  Hz).

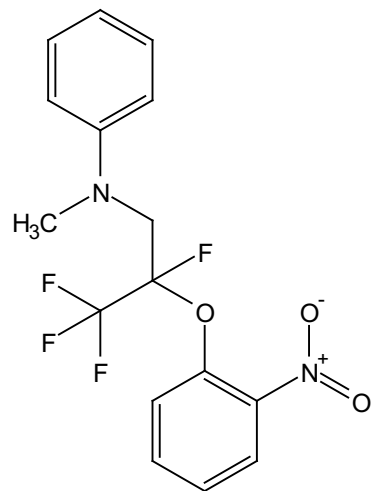

**(31)**

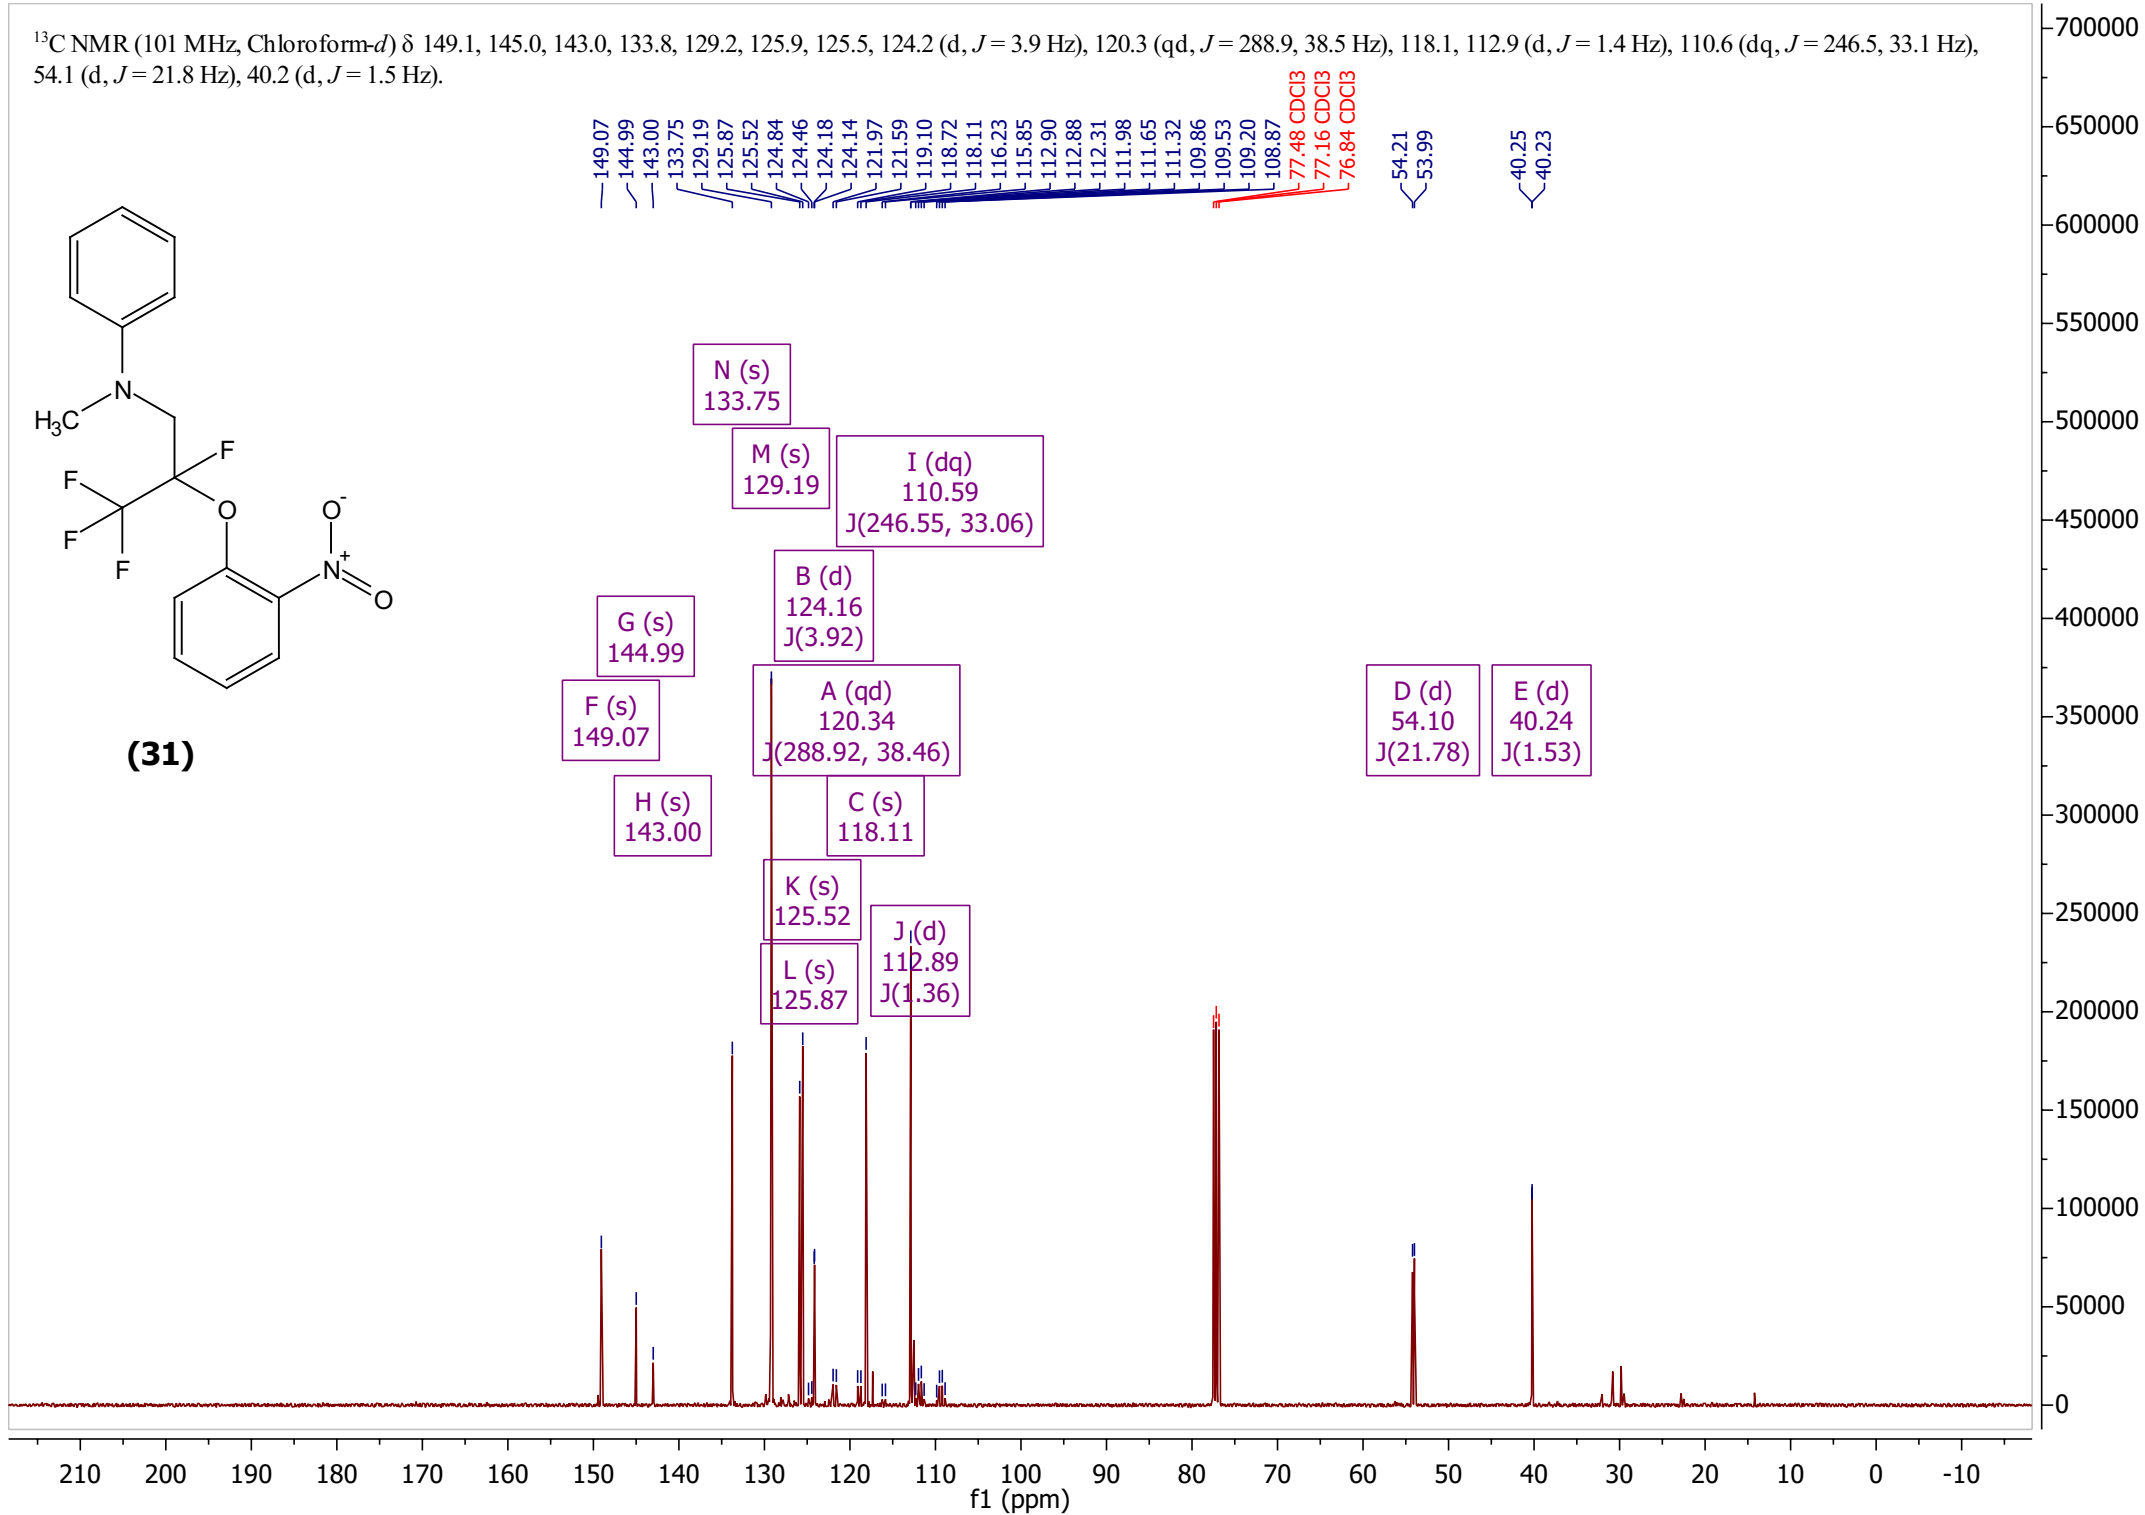

$^1\text{H}$  NMR (400 MHz, Chloroform-*d*)  $\delta$  7.31 (dd,  $J = 8.0, 1.8$  Hz, 1H), 7.24 (dt,  $J = 8.2, 2.0$  Hz, 1H), 7.17 – 7.09 (m, 3H), 7.03 (td,  $J = 7.7, 1.6$  Hz, 1H), 6.74 – 6.64 (m, 3H), 3.96 (t,  $J = 15.8$  Hz, 1H), 3.80 (t,  $J = 16.7$  Hz, 1H), 2.93 (s, 3H).

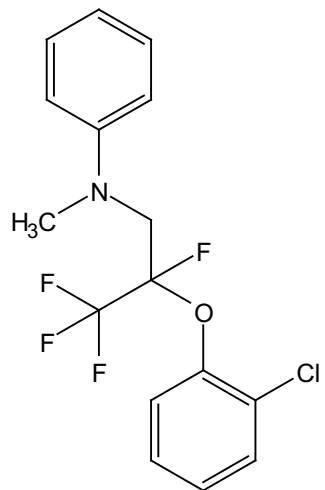

**(32)**

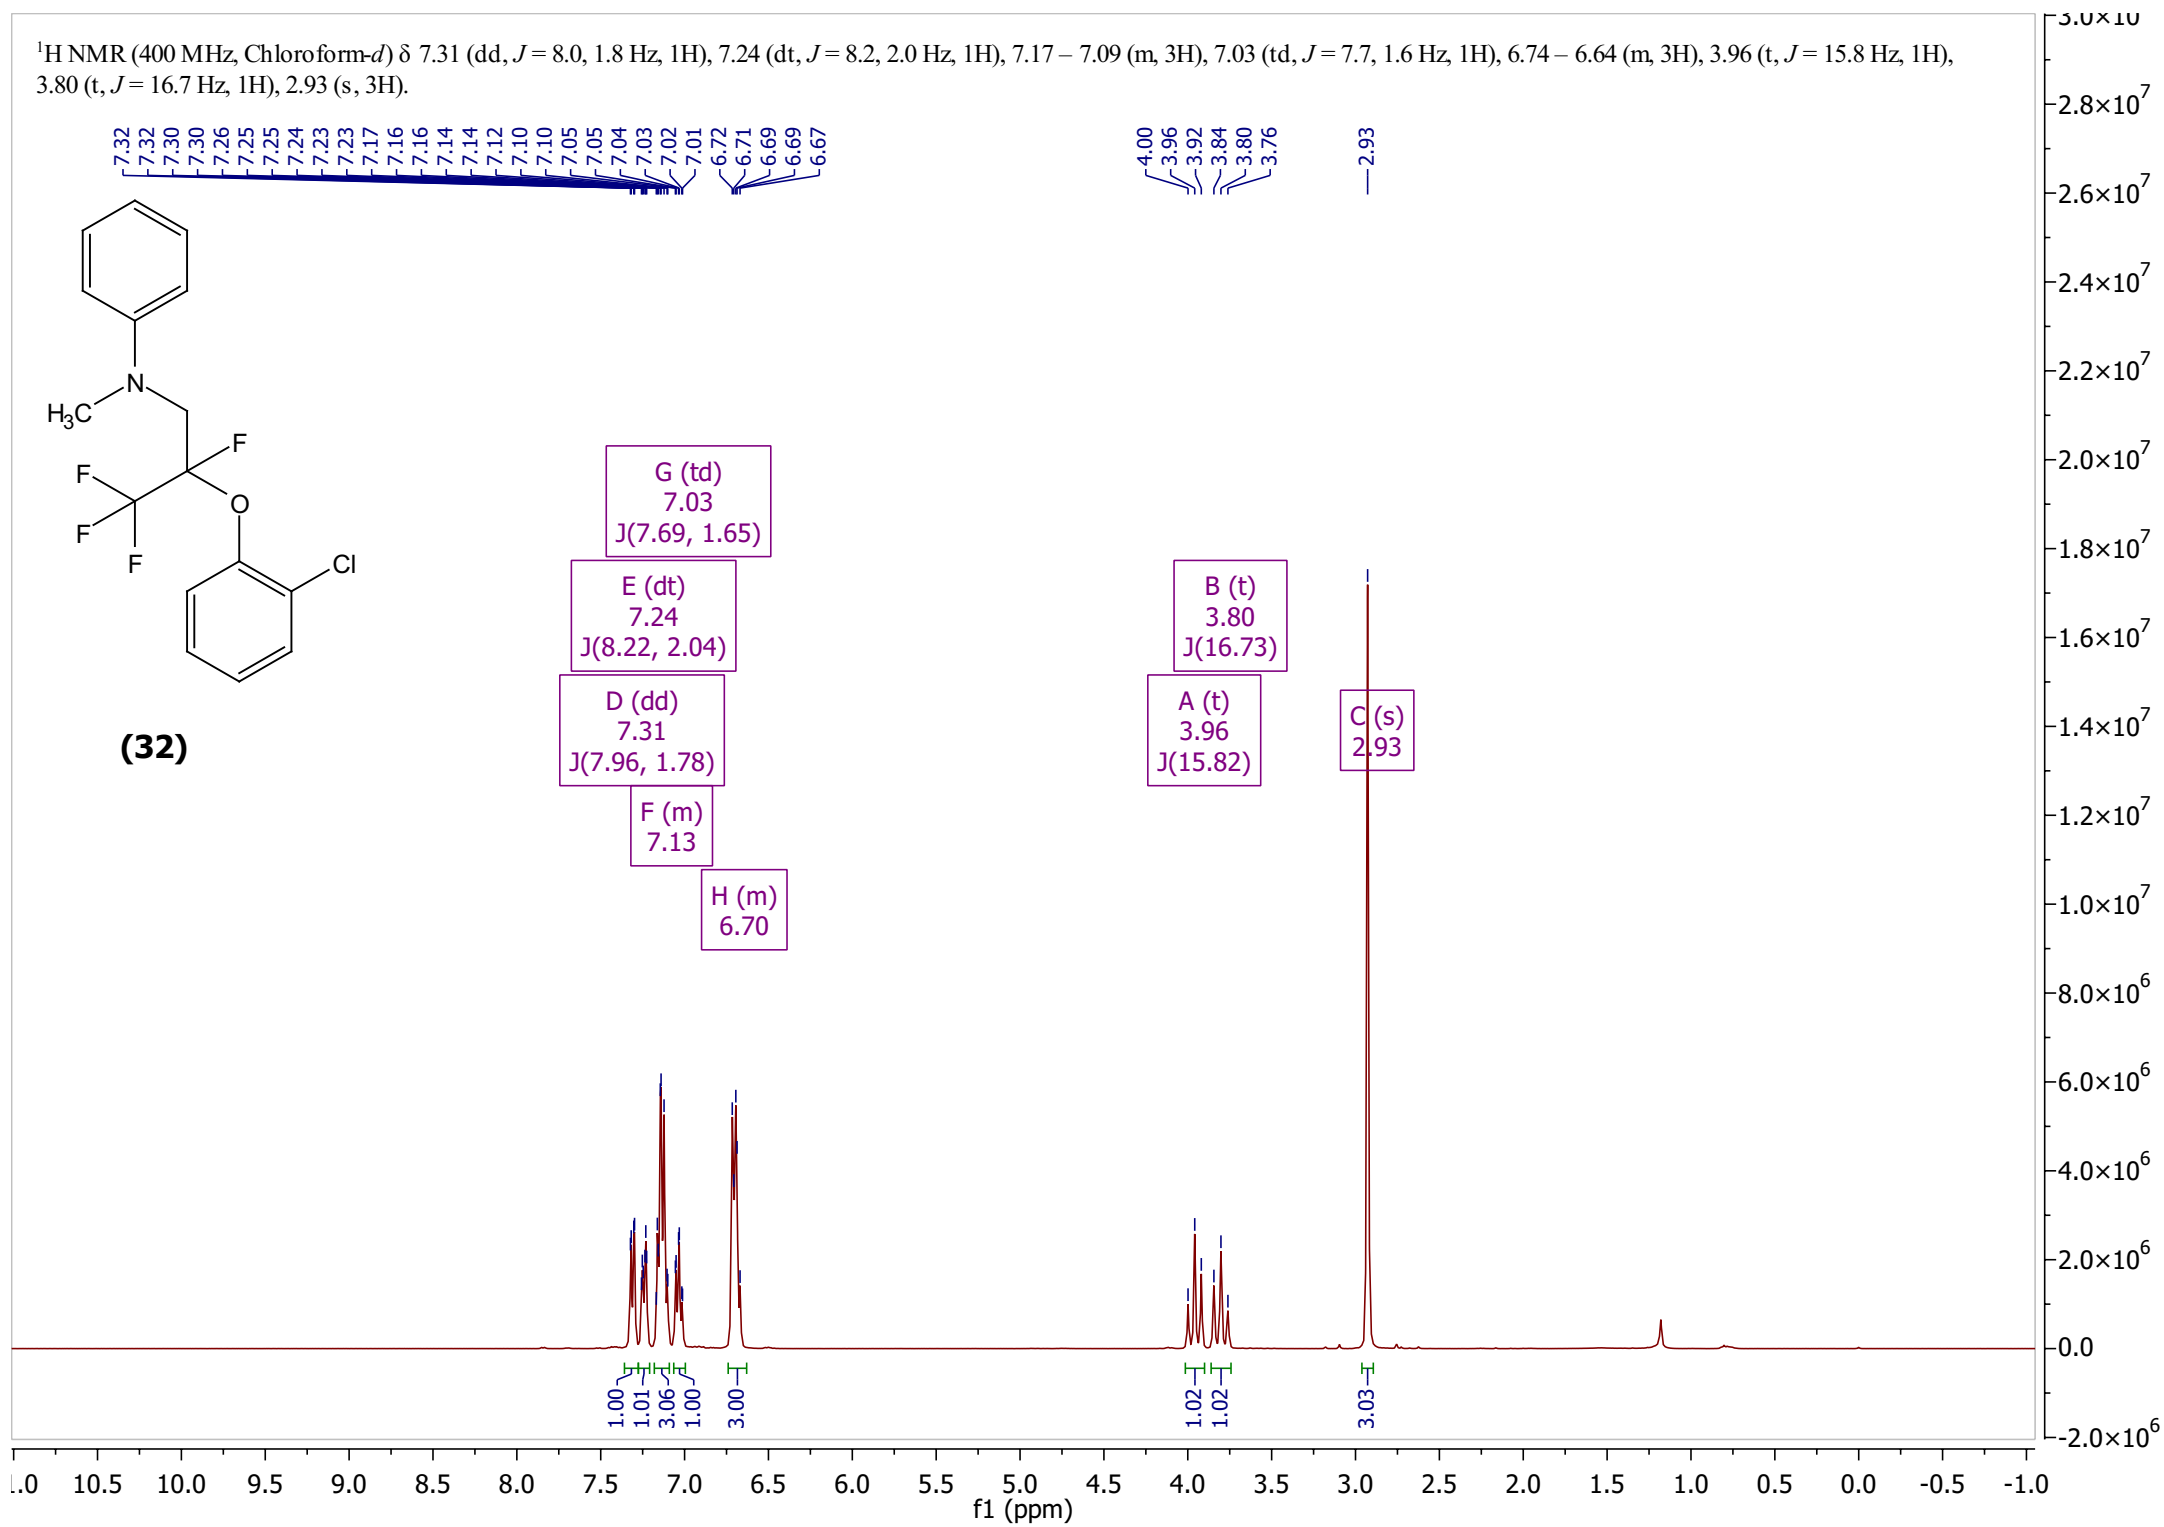

$^{19}\text{F}$  NMR (376 MHz, Chloroform-*d*)  $\delta$  -80.2 (d,  $J = 2.6$  Hz), -124.6 (q,  $J = 2.7$  Hz).

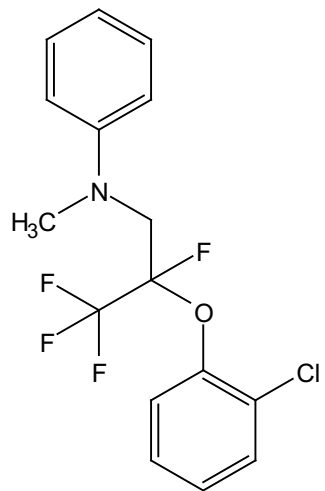

**(32)**

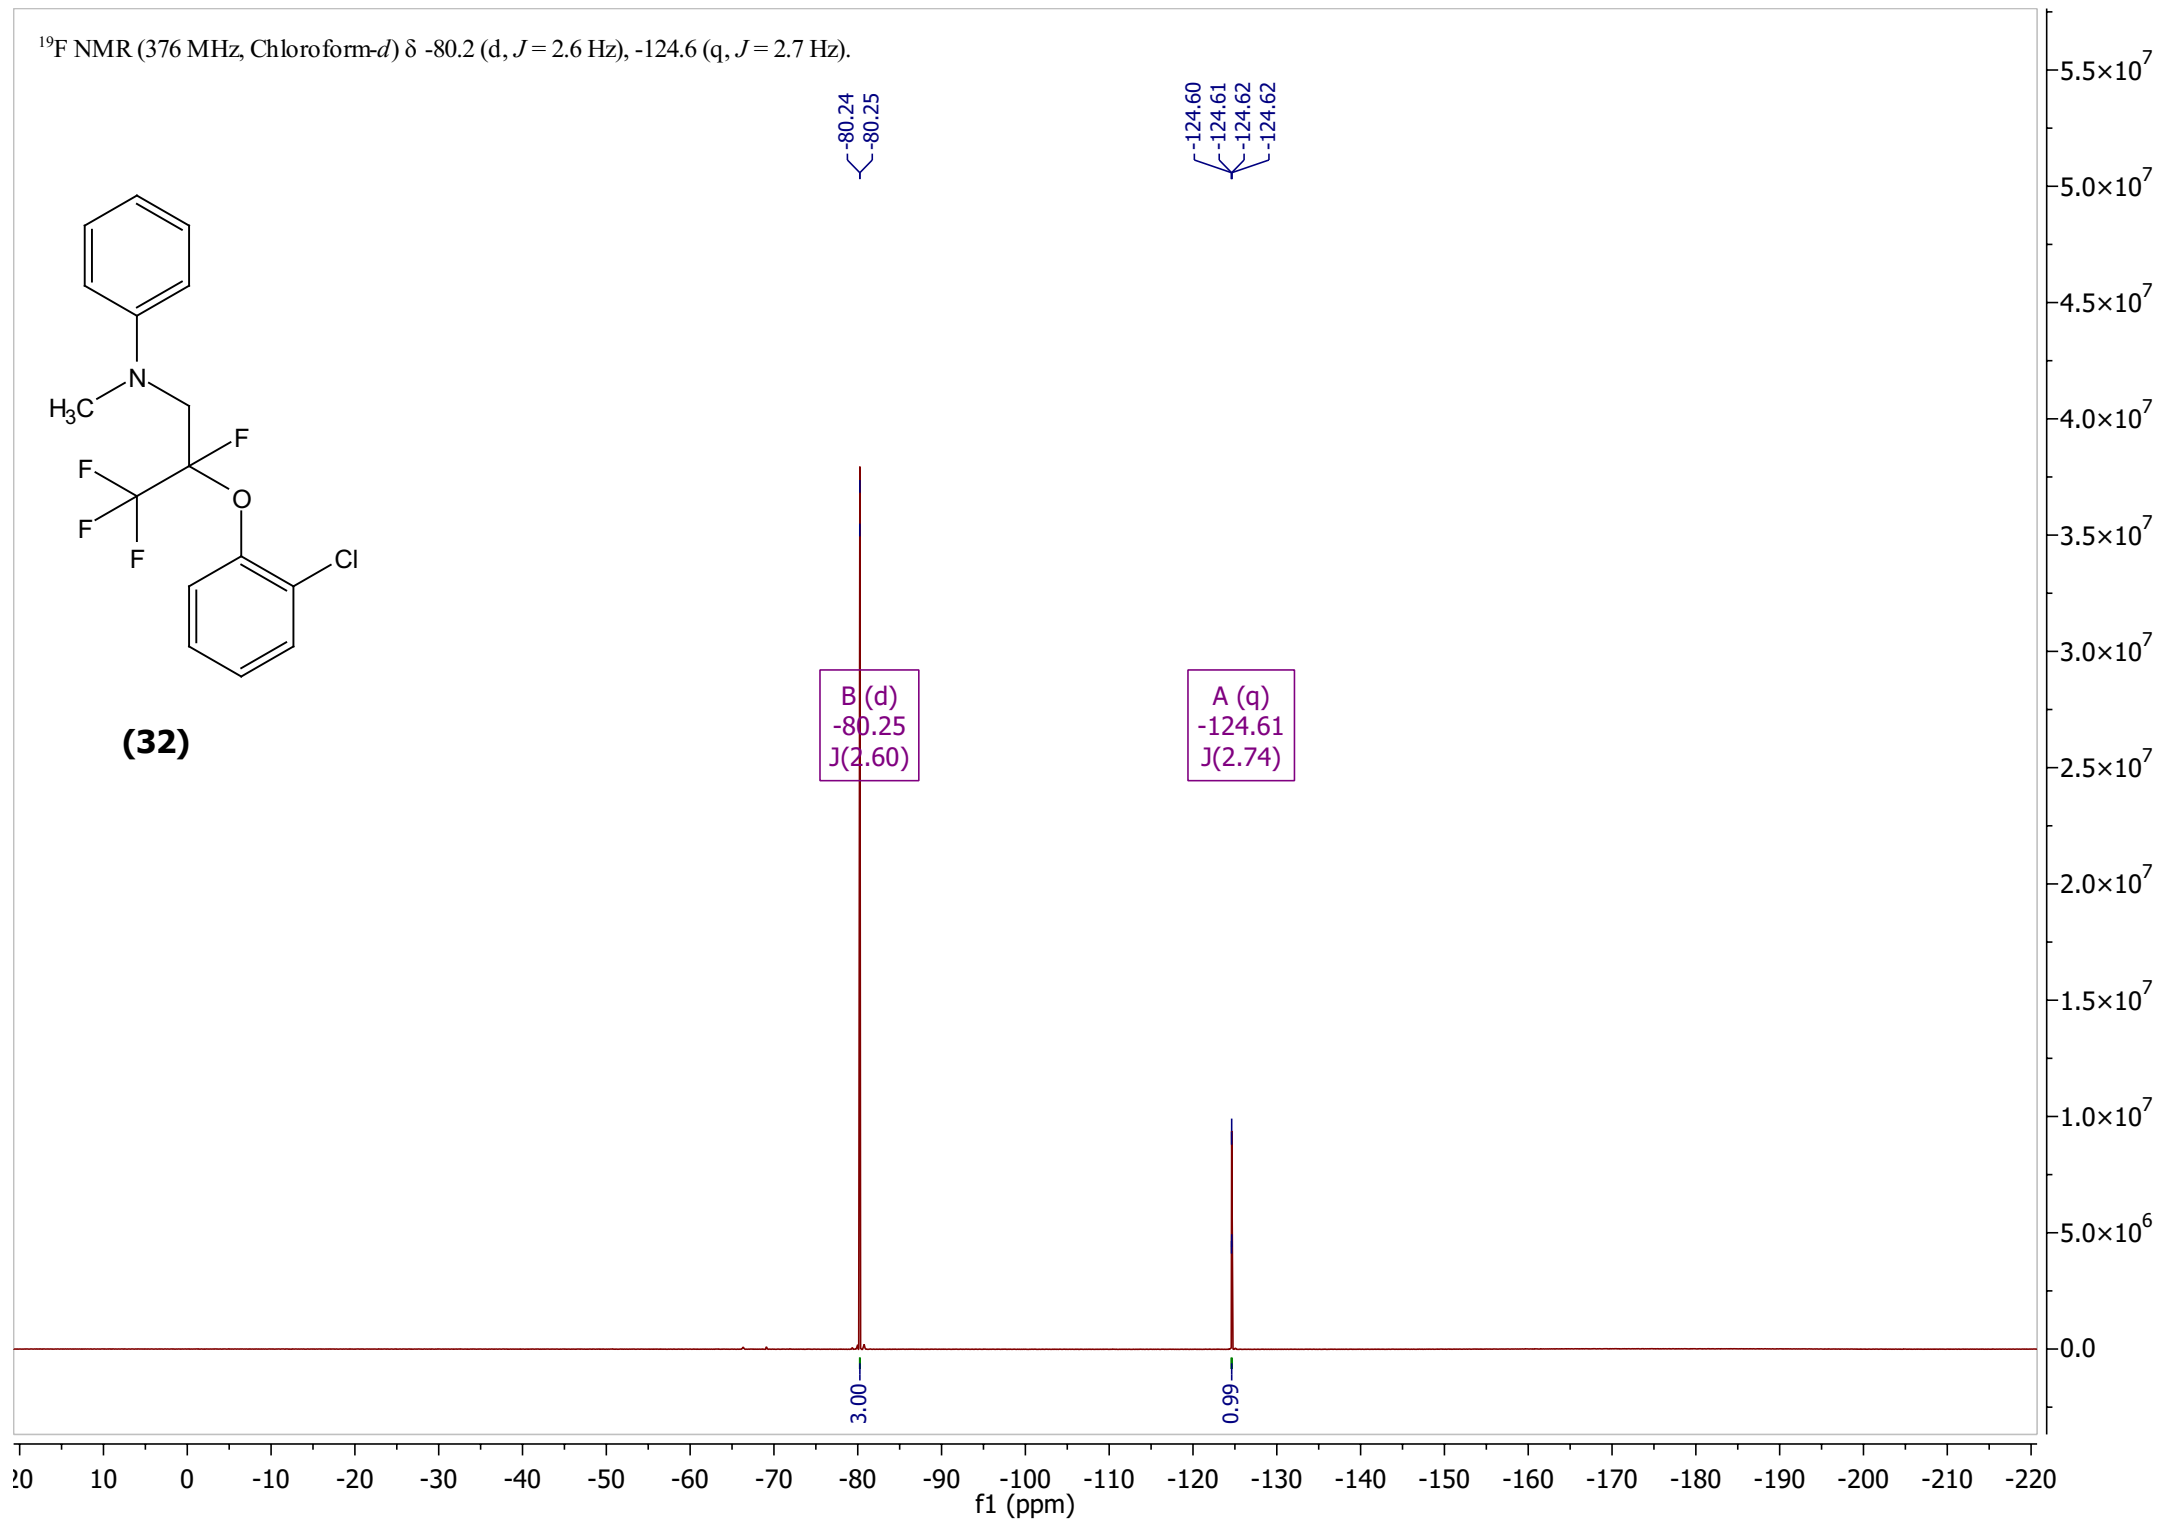

$^{13}\text{C}$  NMR (101 MHz, Chloroform-*d*)  $\delta$  149.3, 148.3, 130.8, 129.2, 127.8, 127.2 (d,  $J = 2.2$  Hz), 126.6, 123.8 (d,  $J = 3.2$  Hz), 120.7 (qd,  $J = 288.8, 39.1$  Hz), 117.9, 112.8 (d,  $J = 1.6$  Hz), 110.1 (dq,  $J = 244.6, 33.0$  Hz), 54.1 (d,  $J = 22.9$  Hz), 40.1.



**(32)**

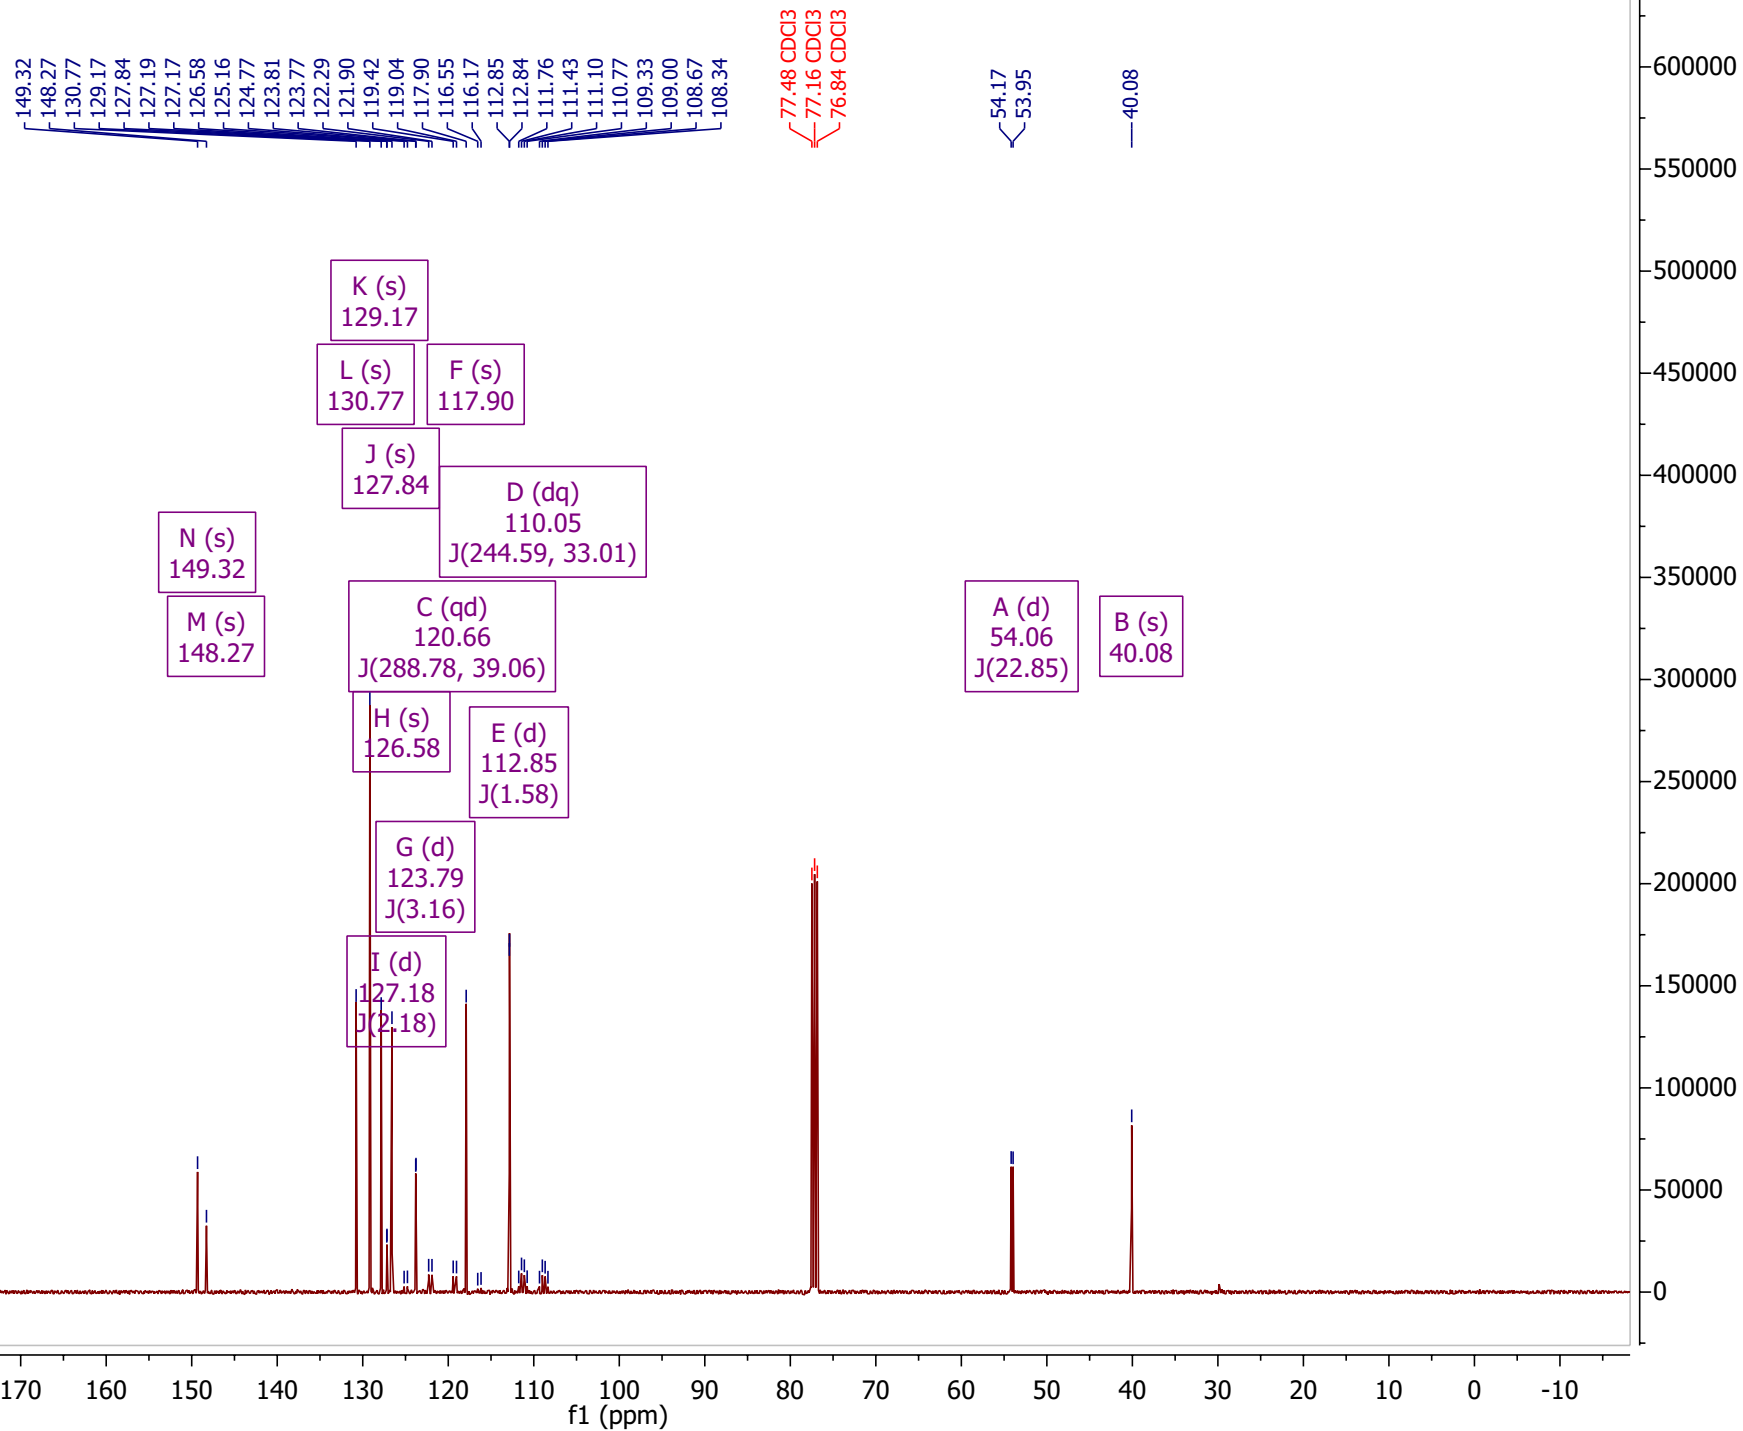

$^1\text{H}$  NMR (400 MHz, Chloroform-*d*)  $\delta$  7.89 (d,  $J$  = 8.7 Hz, 2H), 7.15 (t,  $J$  = 7.8 Hz, 2H), 7.07 (d,  $J$  = 8.0 Hz, 2H), 6.73 – 6.67 (m, 3H), 4.26 (q,  $J$  = 7.1 Hz, 2H), 3.96 – 3.75 (m, 2H), 2.93 (s, 3H), 1.28 (t,  $J$  = 7.2 Hz, 3H).

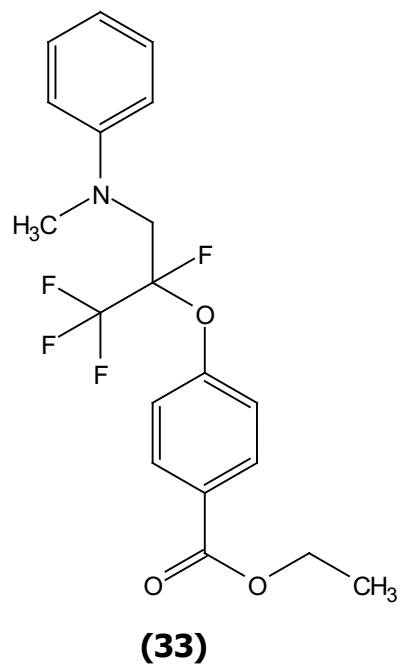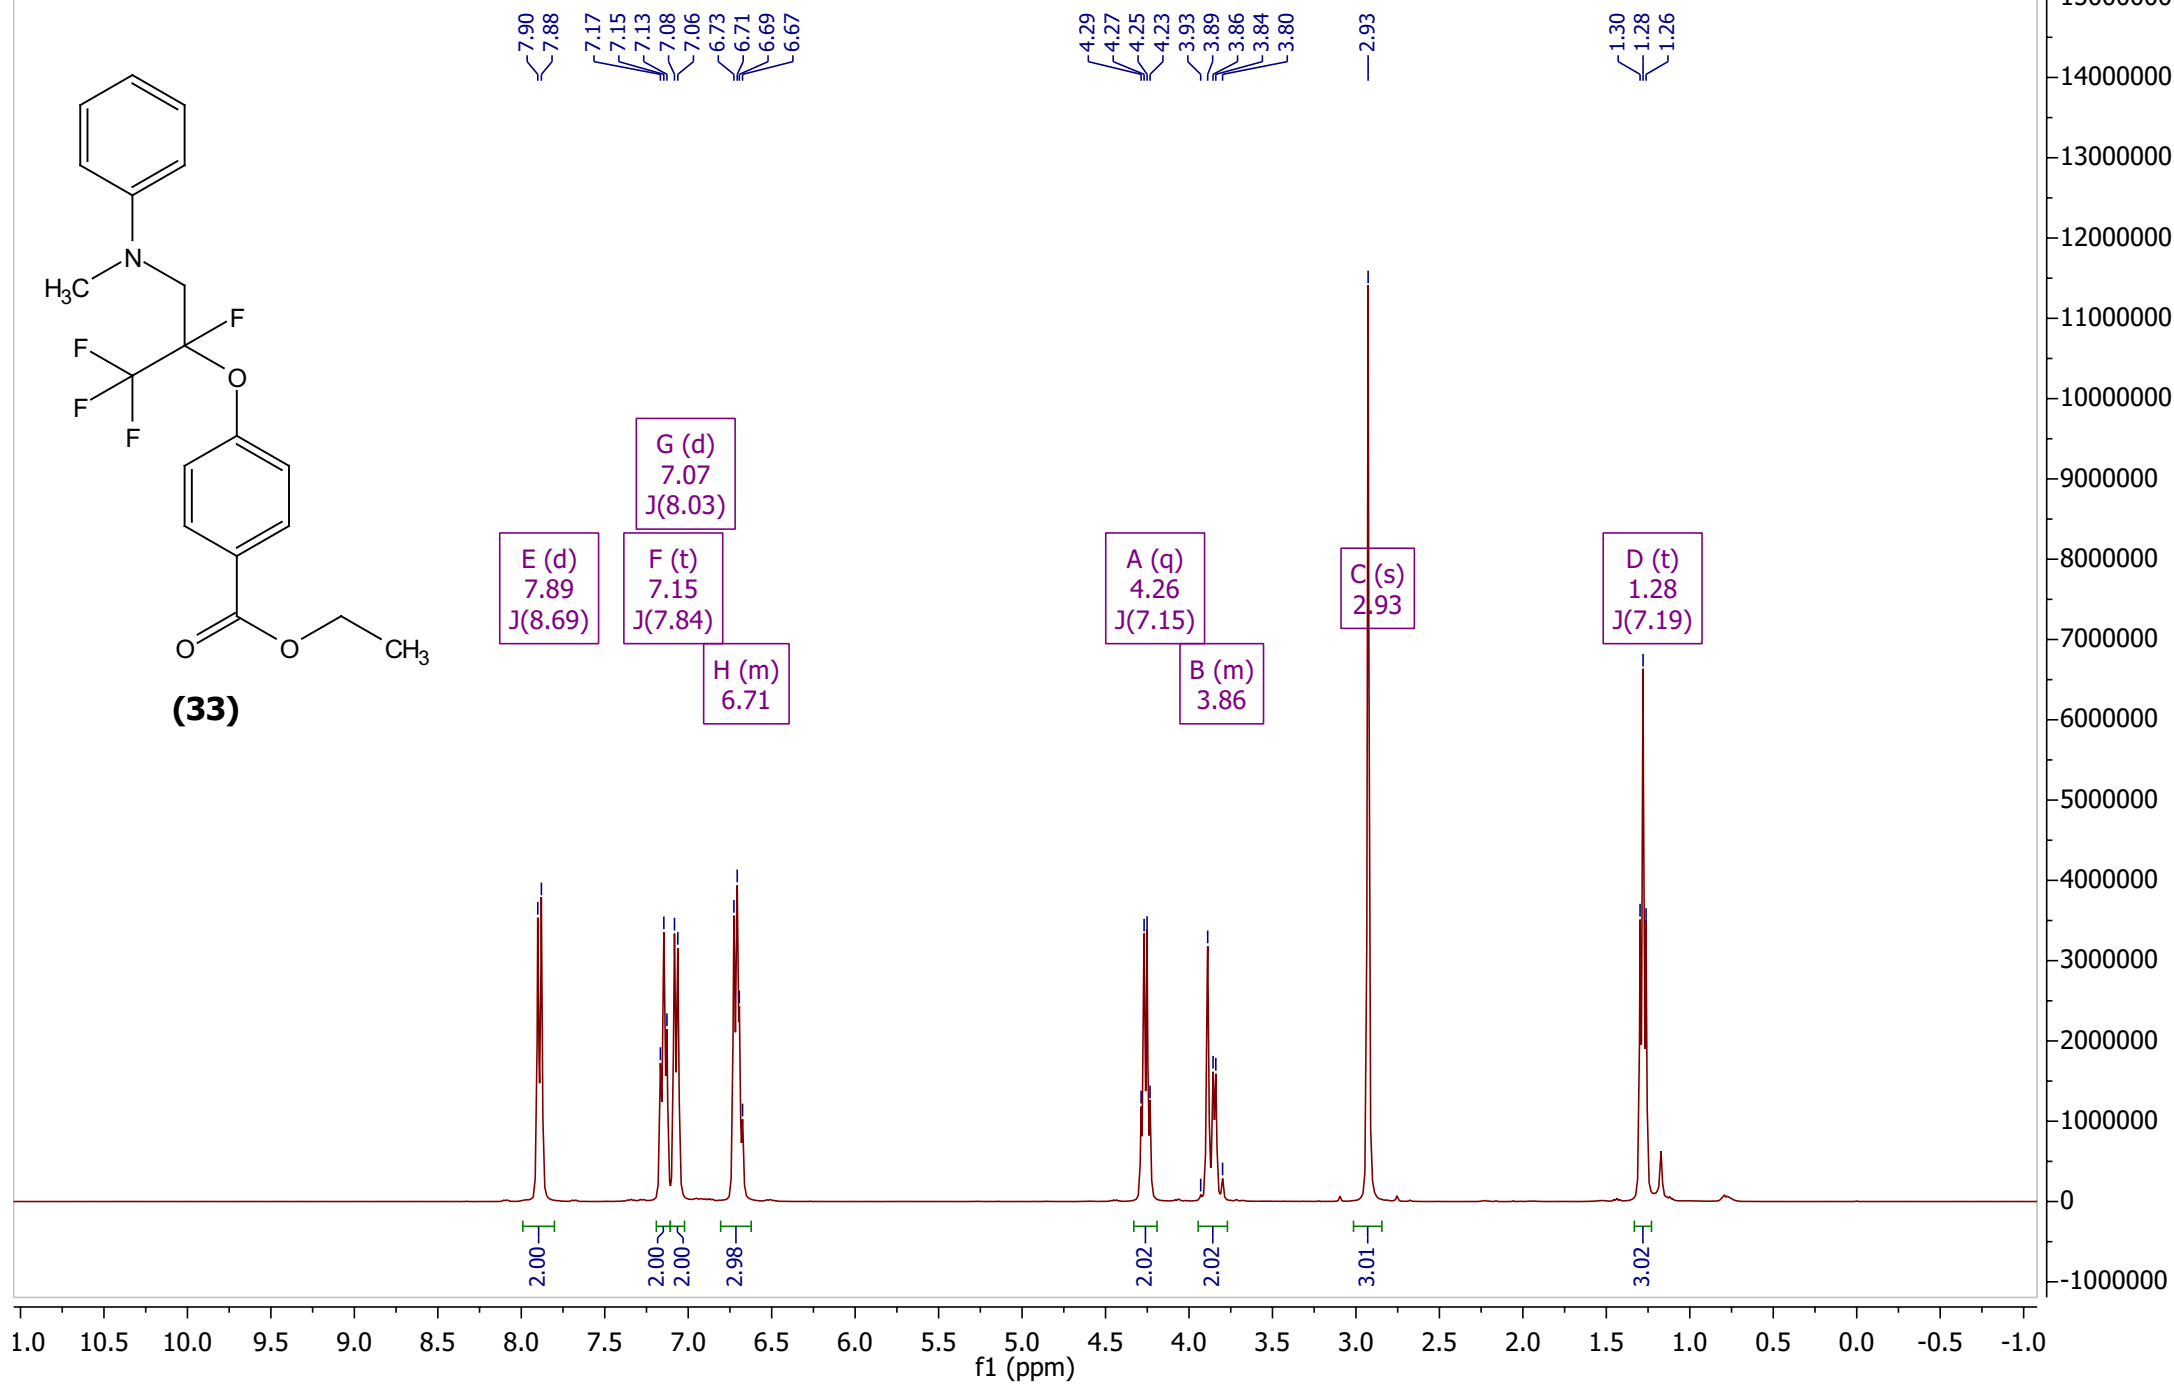

$^{19}\text{F}$  NMR (376 MHz, Chloroform-*d*)  $\delta$  -79.8 (d,  $J = 2.6$  Hz), -126.7 (q,  $J = 2.6$  Hz).



-79.80  
-79.81

-126.71  
-126.72  
-126.73  
-126.74

A (d)  
-79.80  
J(2.60)

B (q)  
-126.72  
J(2.56)

3.00

0.98

f1 (ppm)

1.00×10<sup>7</sup>  
9.00×10<sup>7</sup>  
8.00×10<sup>7</sup>  
7.00×10<sup>7</sup>  
6.00×10<sup>7</sup>  
5.00×10<sup>7</sup>  
4.00×10<sup>7</sup>  
3.00×10<sup>7</sup>  
2.00×10<sup>7</sup>  
1.00×10<sup>7</sup>  
0.00

$^{13}\text{C}$  NMR (101 MHz, Chloroform-*d*)  $\delta$  165.8, 155.8, 149.3, 131.2, 129.2, 127.8, 121.7 (d,  $J = 2.9$  Hz), 120.7 (qd,  $J = 289.4, 39.3$  Hz), 118.0, 112.9, 109.7 (dq,  $J = 243.9, 32.4$  Hz), 61.2, 54.5 (d,  $J = 23.0$  Hz), 40.0 (d,  $J = 1.5$  Hz), 14.4.

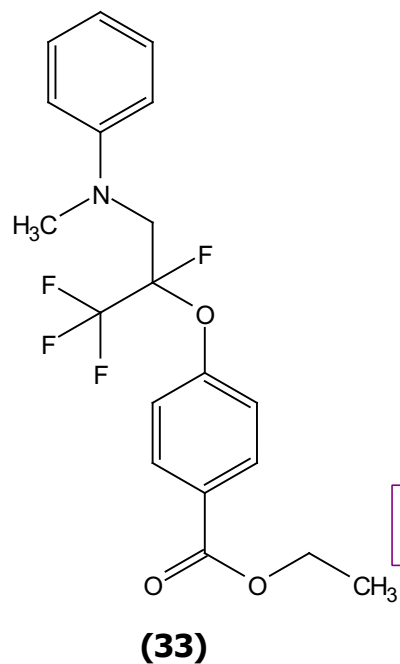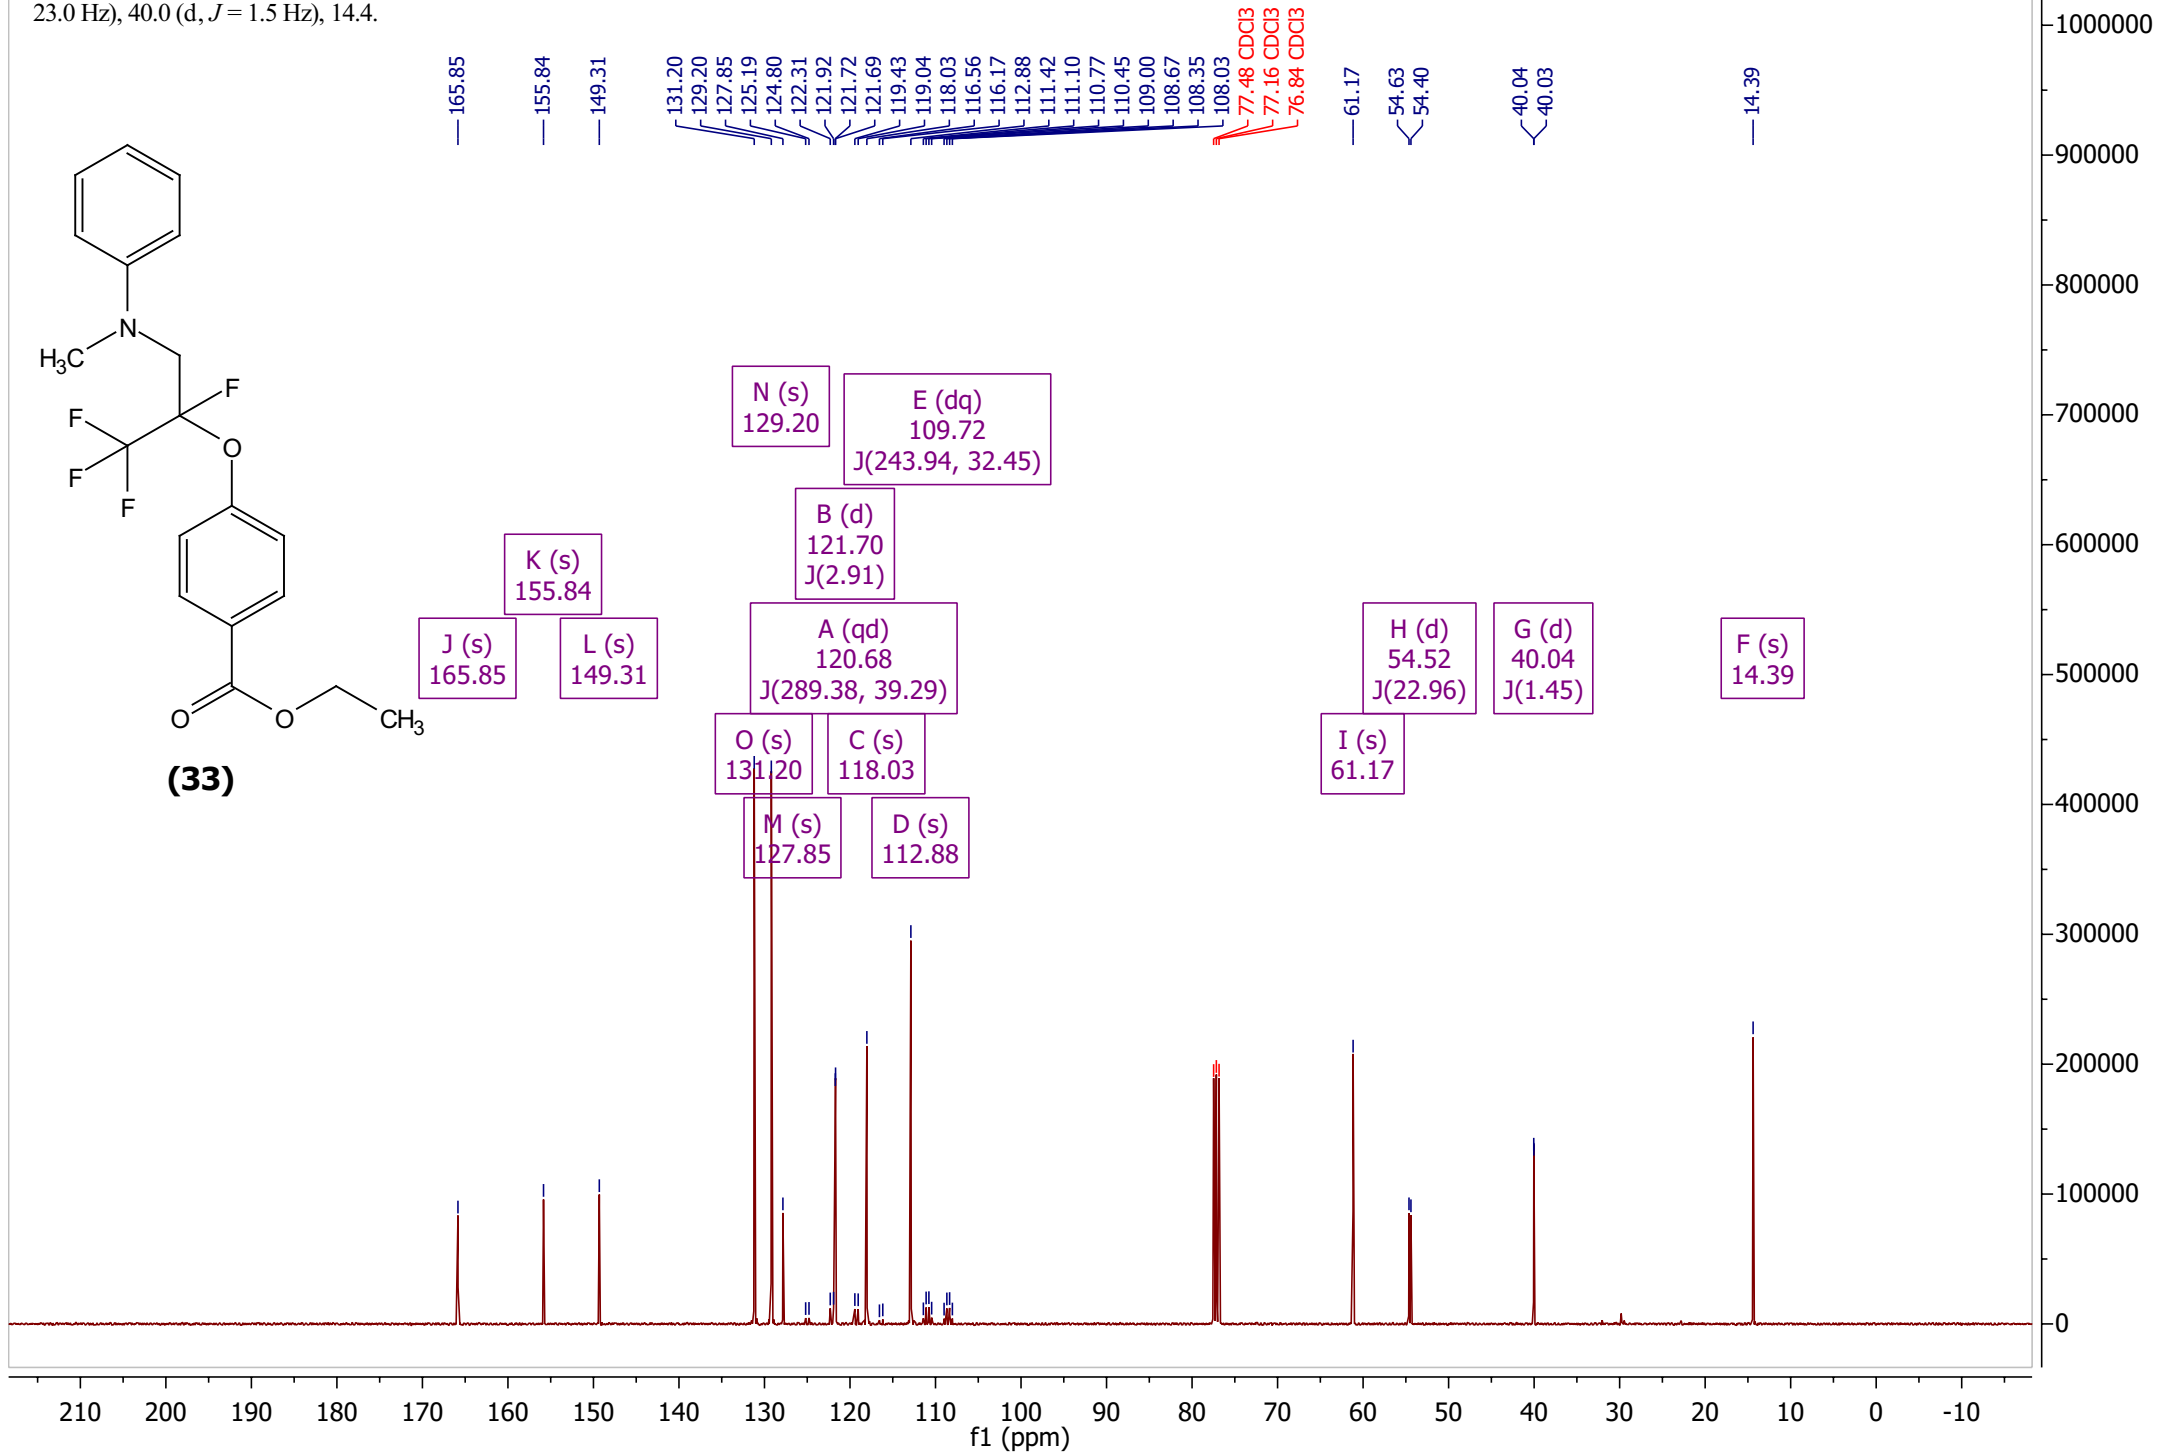

$^1\text{H}$  NMR (400 MHz, Chloroform-*d*)  $\delta$  7.92 – 7.82 (m, 2H), 7.15 (t,  $J = 8.0$  Hz, 2H), 7.07 (d,  $J = 7.6$  Hz, 2H), 6.73 (d,  $J = 8.2$  Hz, 2H), 6.68 (t,  $J = 7.3$  Hz, 1H), 4.27 (q,  $J = 7.1$  Hz, 2H), 3.93 – 3.76 (m, 2H), 3.39 (q,  $J = 7.1$  Hz, 2H), 1.28 (t,  $J = 7.2$  Hz, 3H), 1.06 (t,  $J = 7.0$  Hz, 3H).

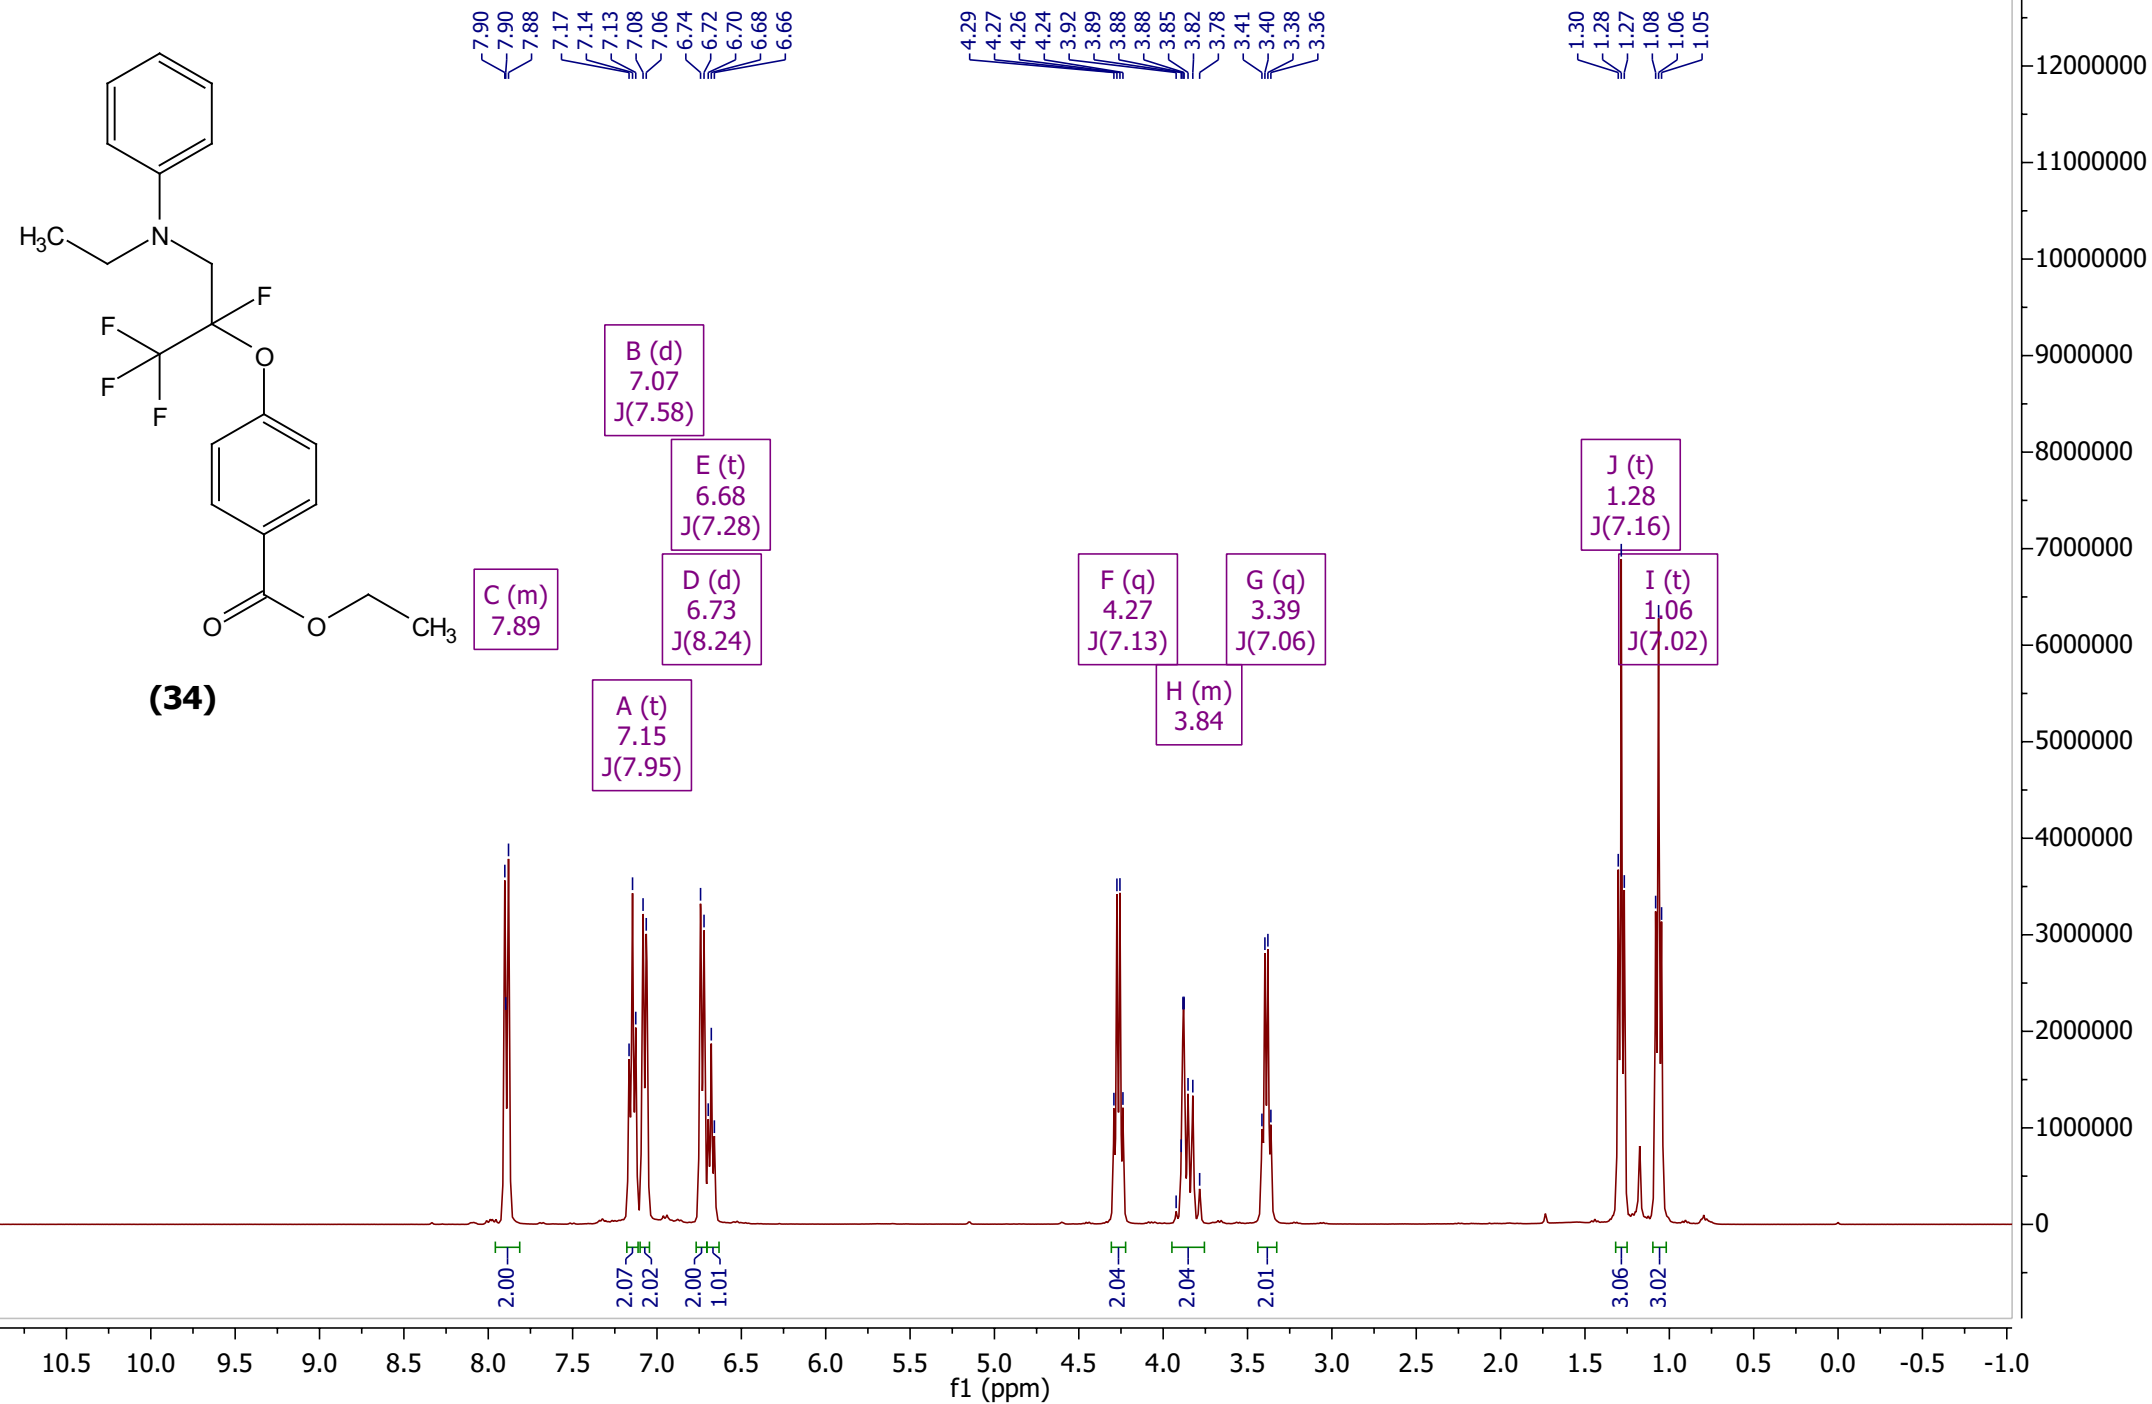



$^{19}\text{F}$  NMR (376 MHz, Chloroform-*d*)  $\delta$  -79.6 (d,  $J = 2.6$  Hz), -127.0 (q,  $J = 2.6$  Hz).

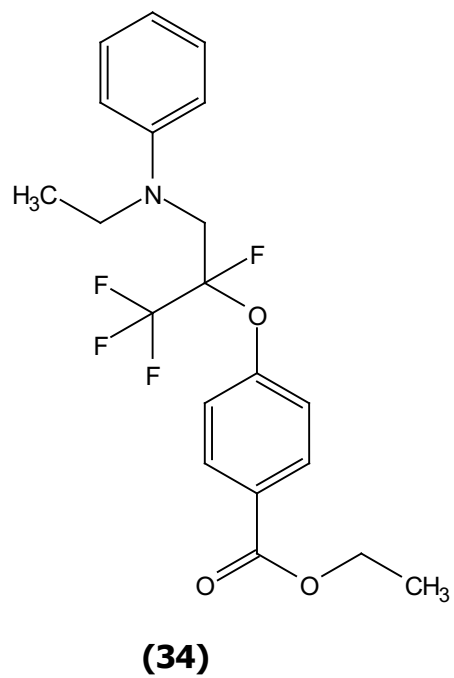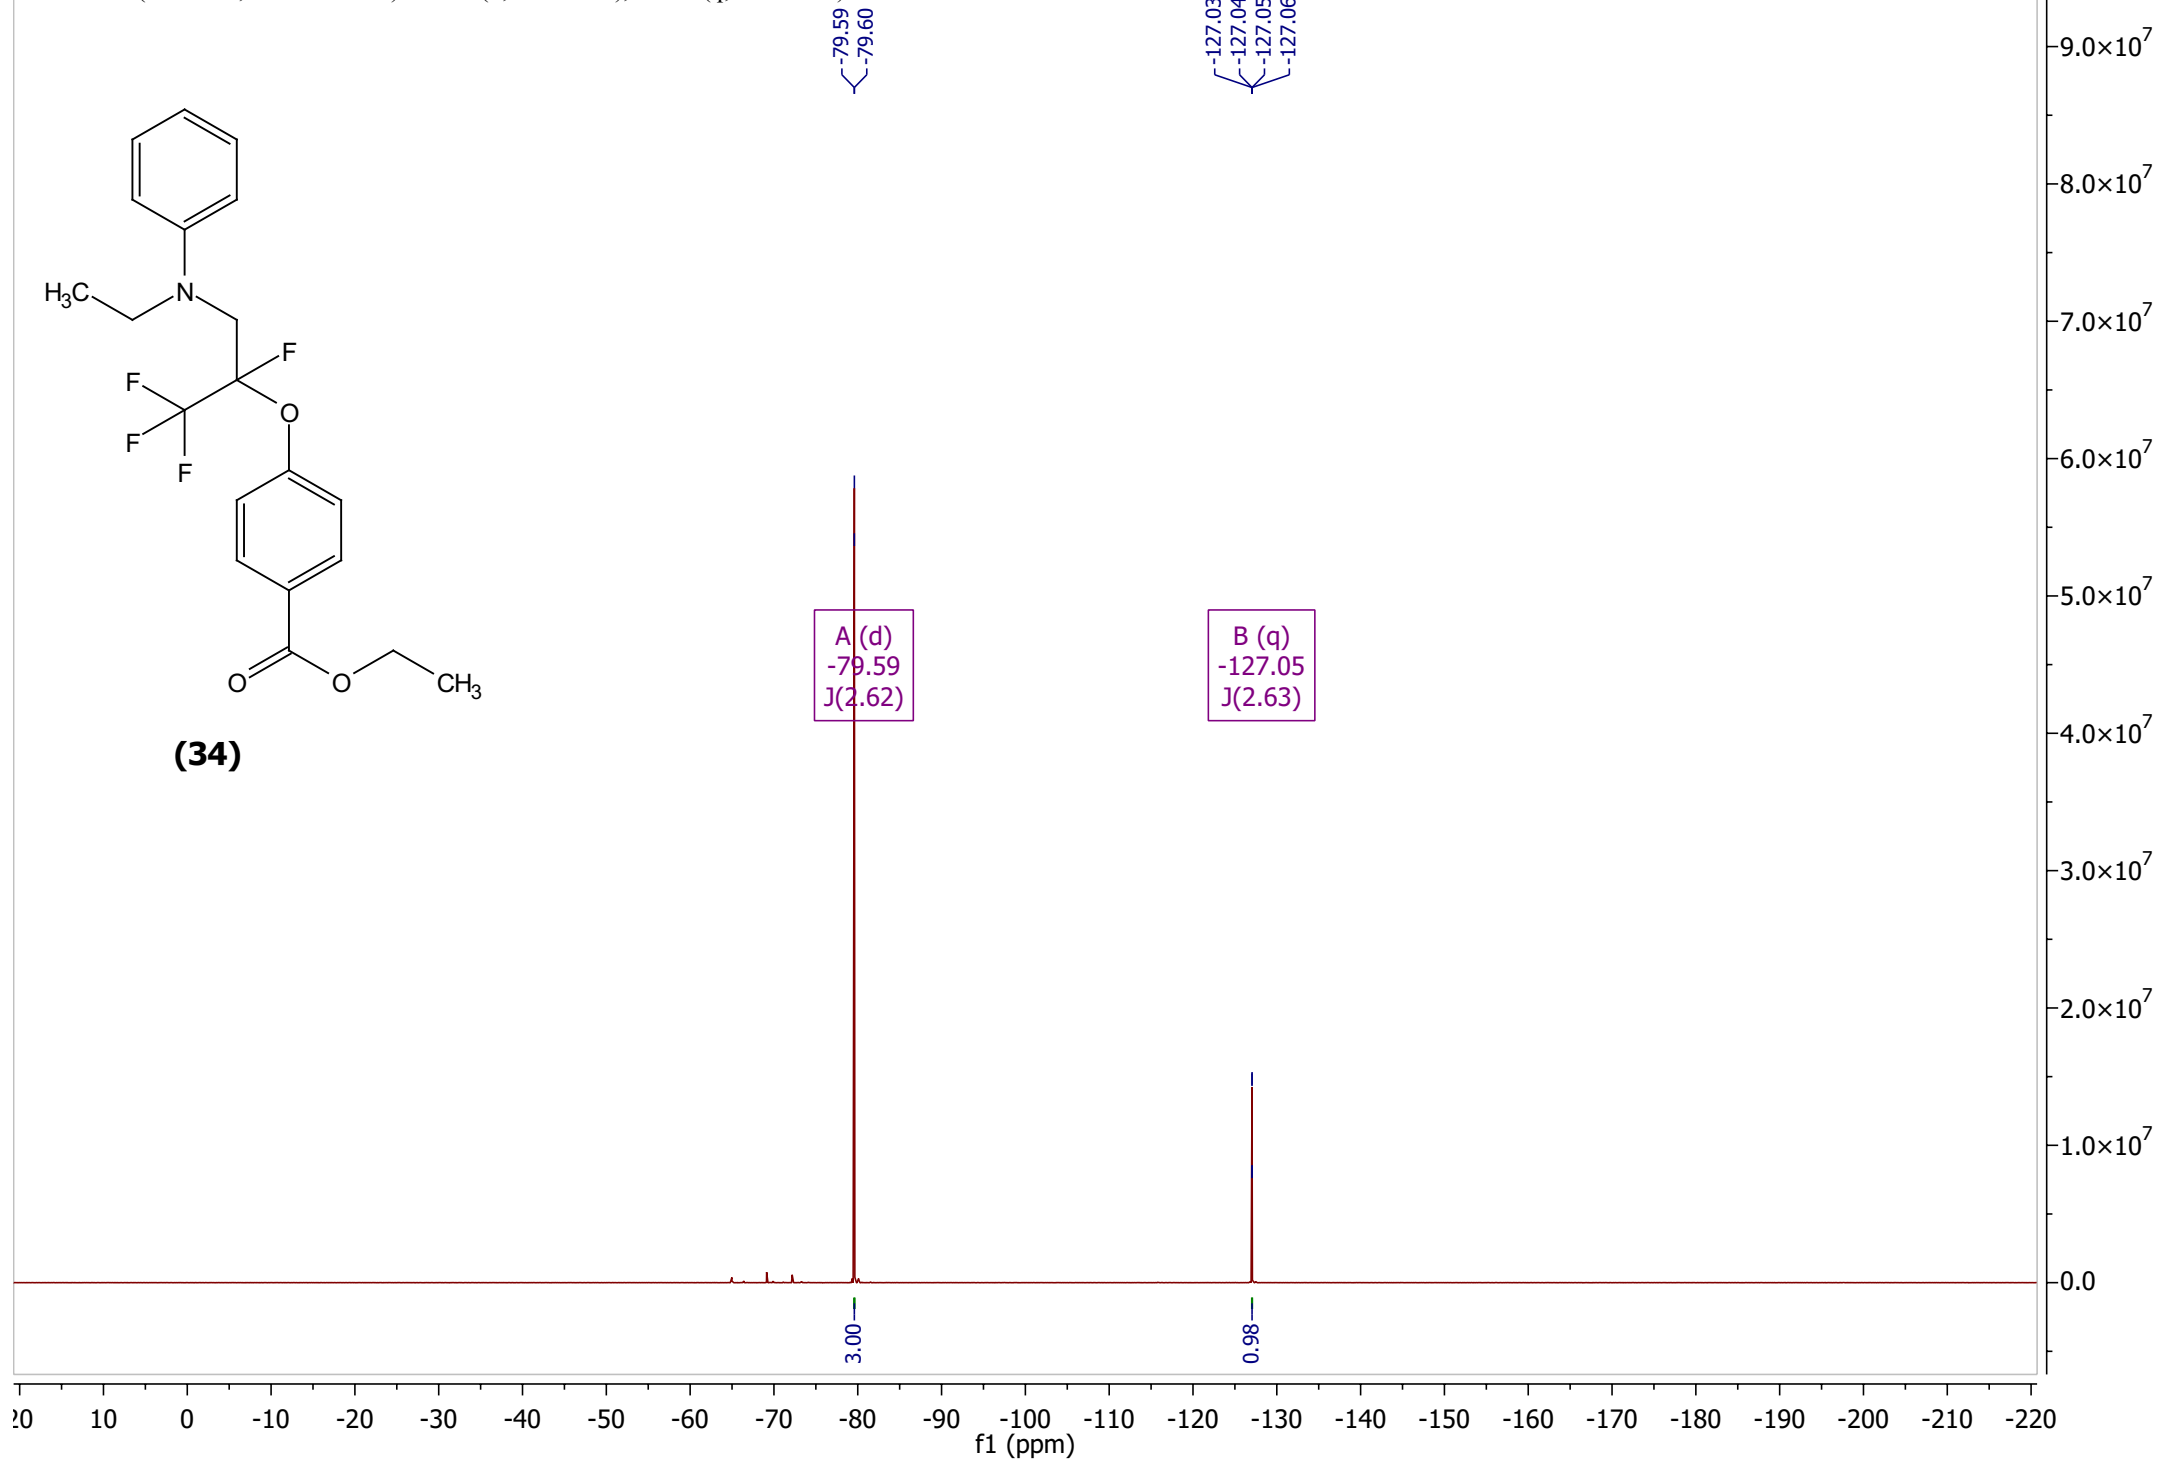

<sup>13</sup>C NMR (101 MHz, Chloroform-*d*) δ 165.9, 156.0, 147.9, 131.2, 129.3, 127.8, 121.7 (d, *J* = 2.7 Hz), 120.8 (qd, *J* = 289.9, 39.8 Hz), 117.8, 113.4 (d, *J* = 1.4 Hz), 109.7 (dq, *J* = 243.7, 32.3 Hz), 61.2, 52.5 (d, *J* = 22.5 Hz), 46.2, 14.4, 11.3.

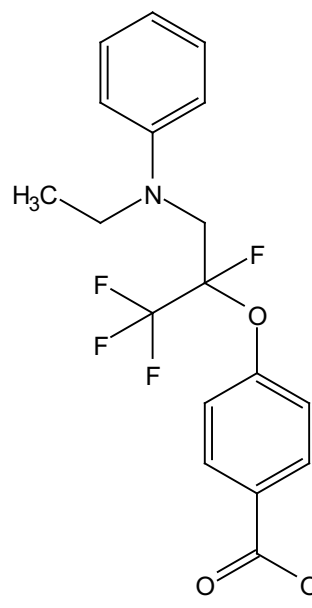

(34)

165.89  
155.97  
147.86  
131.16  
129.28  
127.79  
125.30  
124.90  
122.42  
122.02  
121.74  
121.72  
119.54  
119.14  
117.81  
116.66  
116.26  
113.46  
113.44  
111.42  
111.10  
110.78  
110.46  
109.00  
108.68  
108.36  
108.04  
77.48 CDCl<sub>3</sub>  
77.16 CDCl<sub>3</sub>  
76.84 CDCl<sub>3</sub>  
61.17  
52.62  
52.39  
46.21  
14.40  
11.32

H (s) 131.16  
D (s) 117.81  
G (s) 129.28  
B (dq) 109.73  
J(243.75, 32.26)  
M (d) 52.51  
J(22.52)  
K (s) 165.89  
I (s) 147.86  
A (qd) 120.78  
J(289.86, 39.80)  
L (s) 61.17  
N (s) 46.21  
F (s) 127.79  
C (d) 113.45  
J(1.42)  
E (d) 121.73  
J(2.66)  
O (s) 14.40  
P (s) 11.32

210 200 190 180 170 160 150 140 130 120 110 100 90 80 70 60 50 40 30 20 10 0 -10  
f1 (ppm)

700000  
650000  
600000  
550000  
500000  
450000  
400000  
350000  
300000  
250000  
200000  
150000  
100000  
50000  
0

<sup>1</sup>H NMR (400 MHz, Chloroform-*d*) δ 7.93 (d, *J* = 8.9 Hz, 2H), 7.16 (d, *J* = 8.1 Hz, 2H), 6.97 (t, *J* = 8.1 Hz, 2H), 6.62 (t, *J* = 7.4 Hz, 1H), 6.36 (d, *J* = 7.8 Hz, 1H), 4.28 (q, *J* = 7.1 Hz, 2H), 3.76–3.50 (m, 2H), 3.46–3.31 (m, 2H), 2.89 (t, *J* = 8.5 Hz, 2H), 1.30 (t, *J* = 7.2 Hz, 3H).

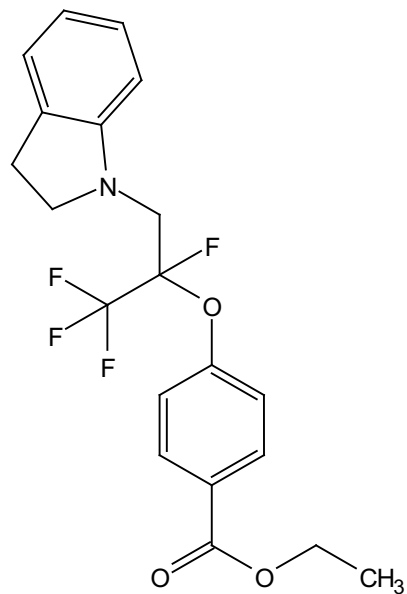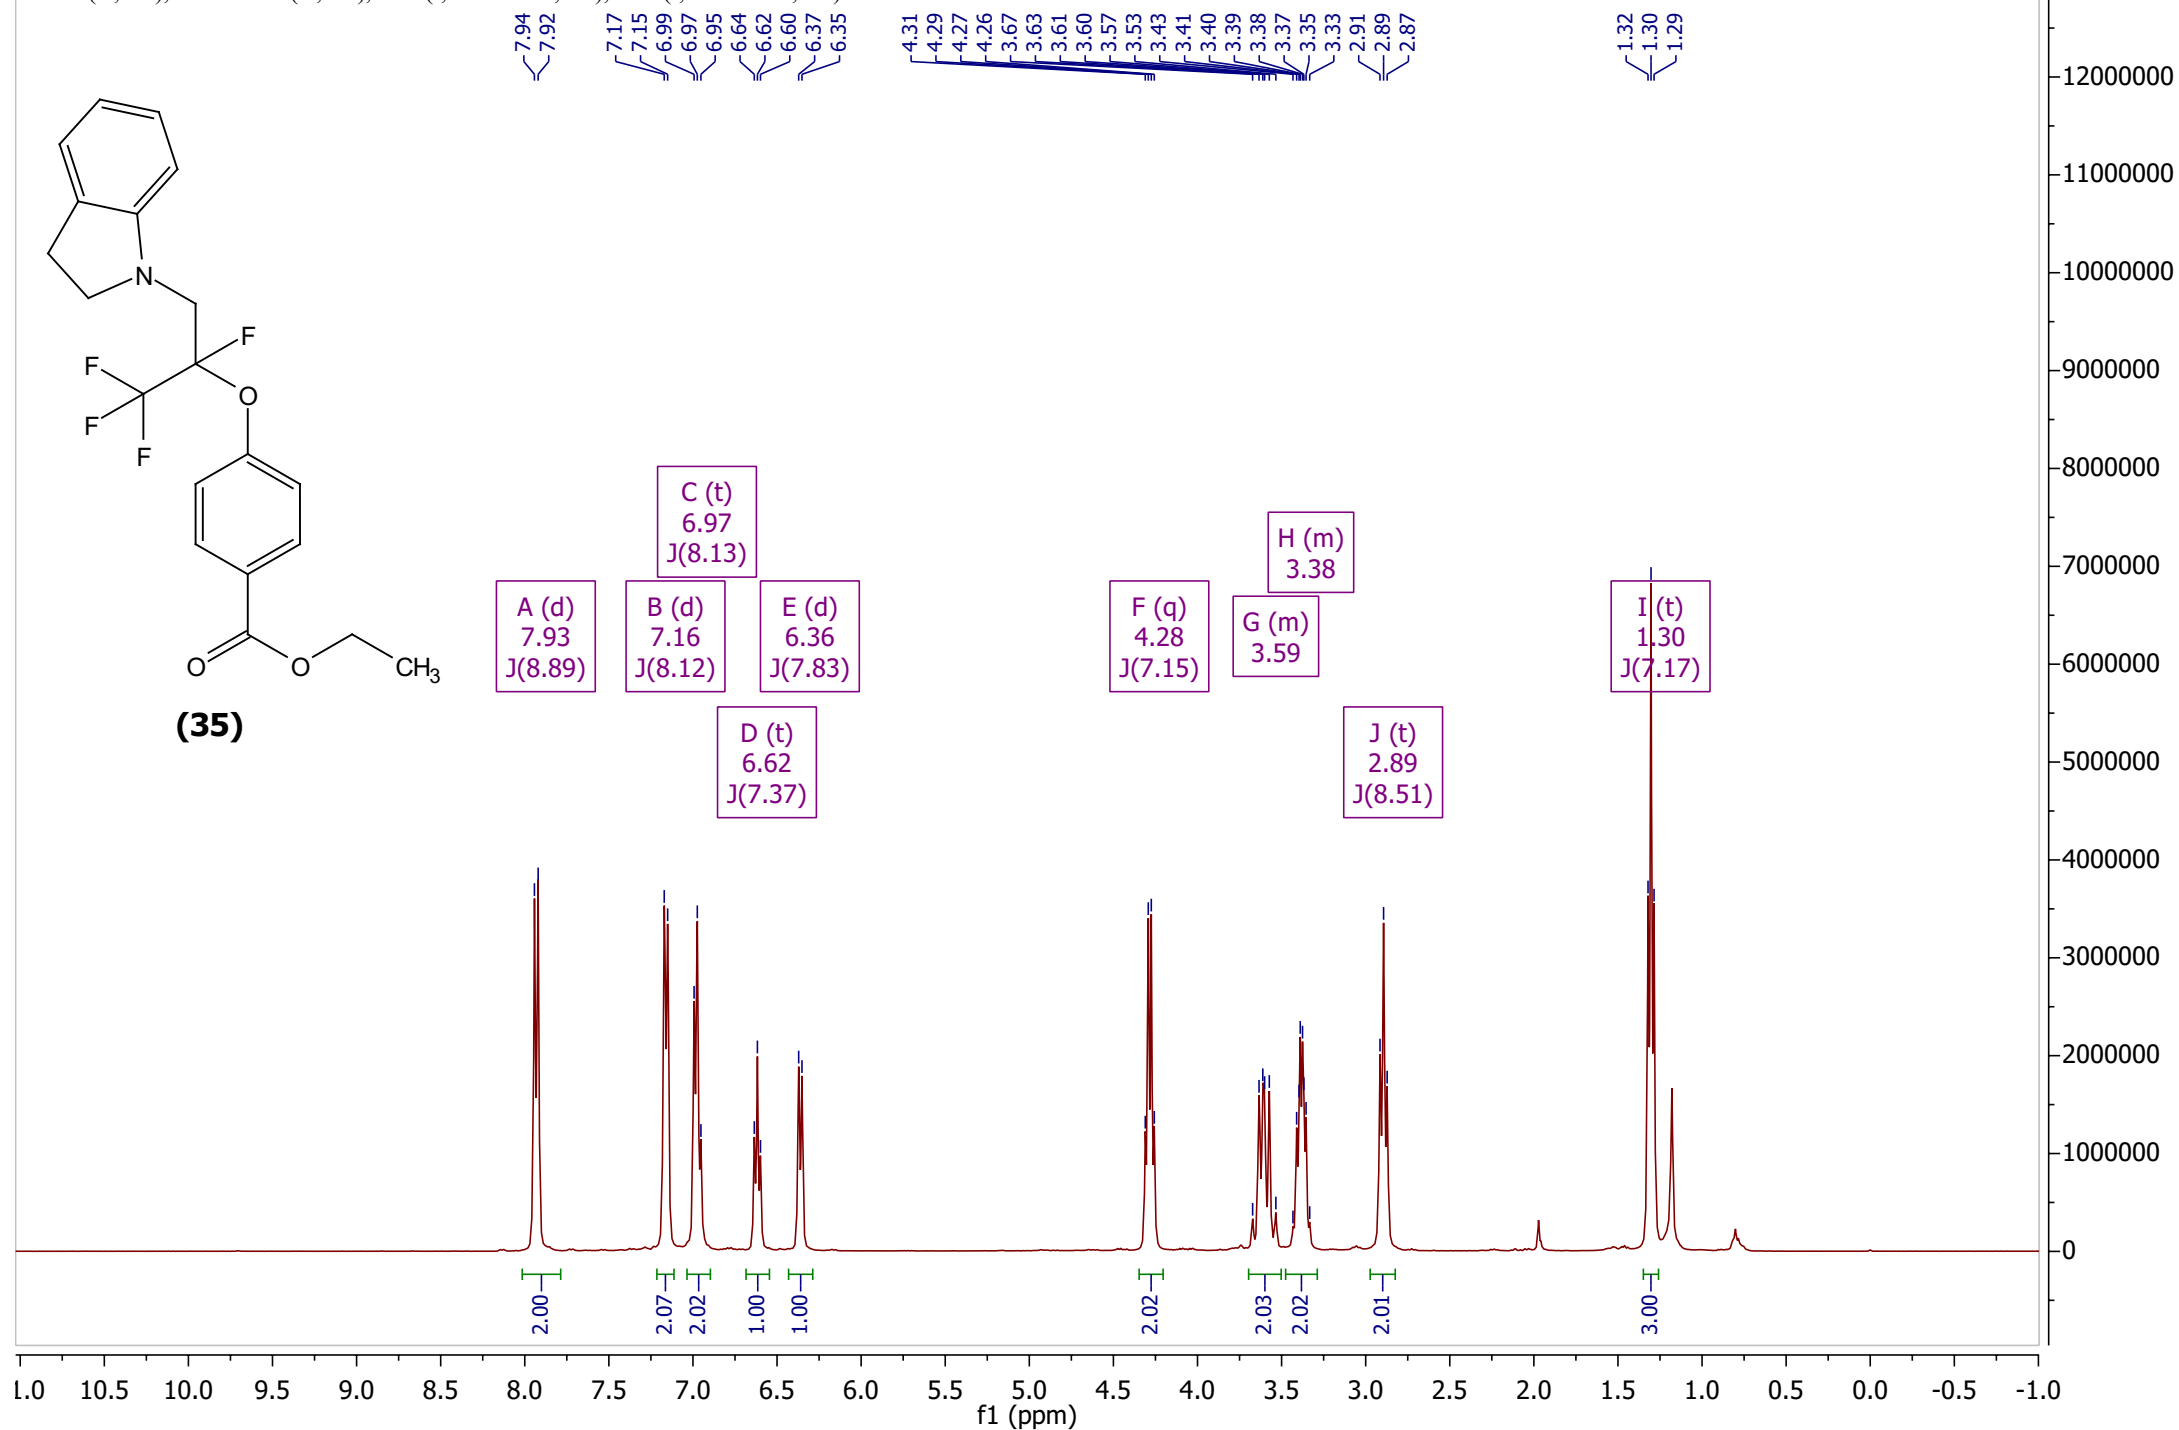

$^{19}\text{F}$  NMR (376 MHz, Chloroform-*d*)  $\delta$  -79.9 (d,  $J = 2.6$  Hz), -124.7 (q,  $J = 3.0$  Hz).

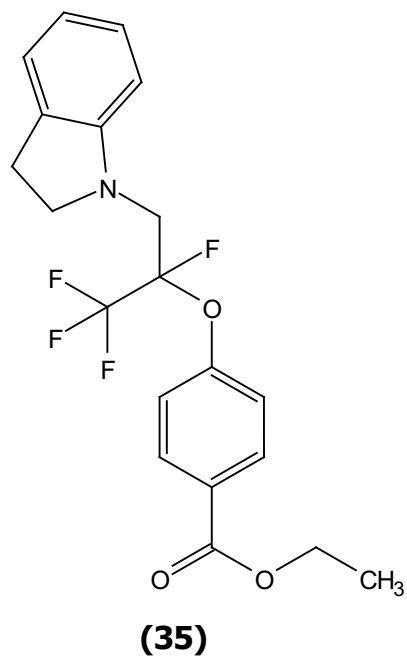

-79.87  
-79.88

-124.70  
-124.71  
-124.71  
-124.72

B (d)  
-79.88  
J(2.62)

A (q)  
-124.71  
J(2.97)

3.00

1.00

20 10 0 -10 -20 -30 -40 -50 -60 -70 -80 -90 -100 -110 -120 -130 -140 -150 -160 -170 -180 -190 -200 -210 -220  
f1 (ppm)

$4.5 \times 10^7$   
 $4.0 \times 10^7$   
 $3.5 \times 10^7$   
 $3.0 \times 10^7$   
 $2.5 \times 10^7$   
 $2.0 \times 10^7$   
 $1.5 \times 10^7$   
 $1.0 \times 10^7$   
 $5.0 \times 10^6$   
0.0

$^{13}\text{C}$  NMR (101 MHz, Chloroform-*d*)  $\delta$  165.9, 155.9, 151.6, 131.3, 129.1, 127.9, 127.5, 124.7, 121.7 (d,  $J = 2.7$  Hz), 120.6 (qd,  $J = 288.7, 38.7$  Hz), 118.7, 109.4 (dq,  $J = 241.8, 32.4$  Hz), 106.8, 61.2, 55.5, 52.6 (d,  $J = 26.8$  Hz), 28.9, 14.4.

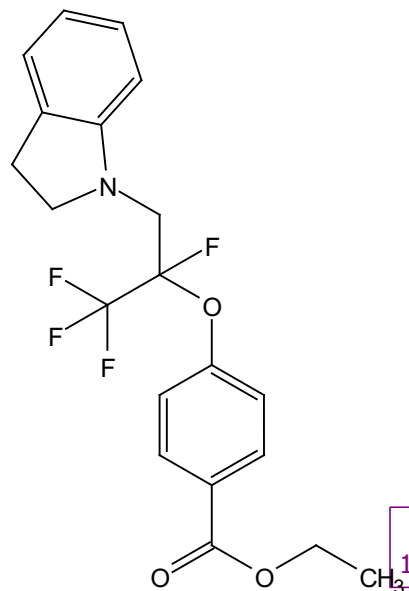

(35)

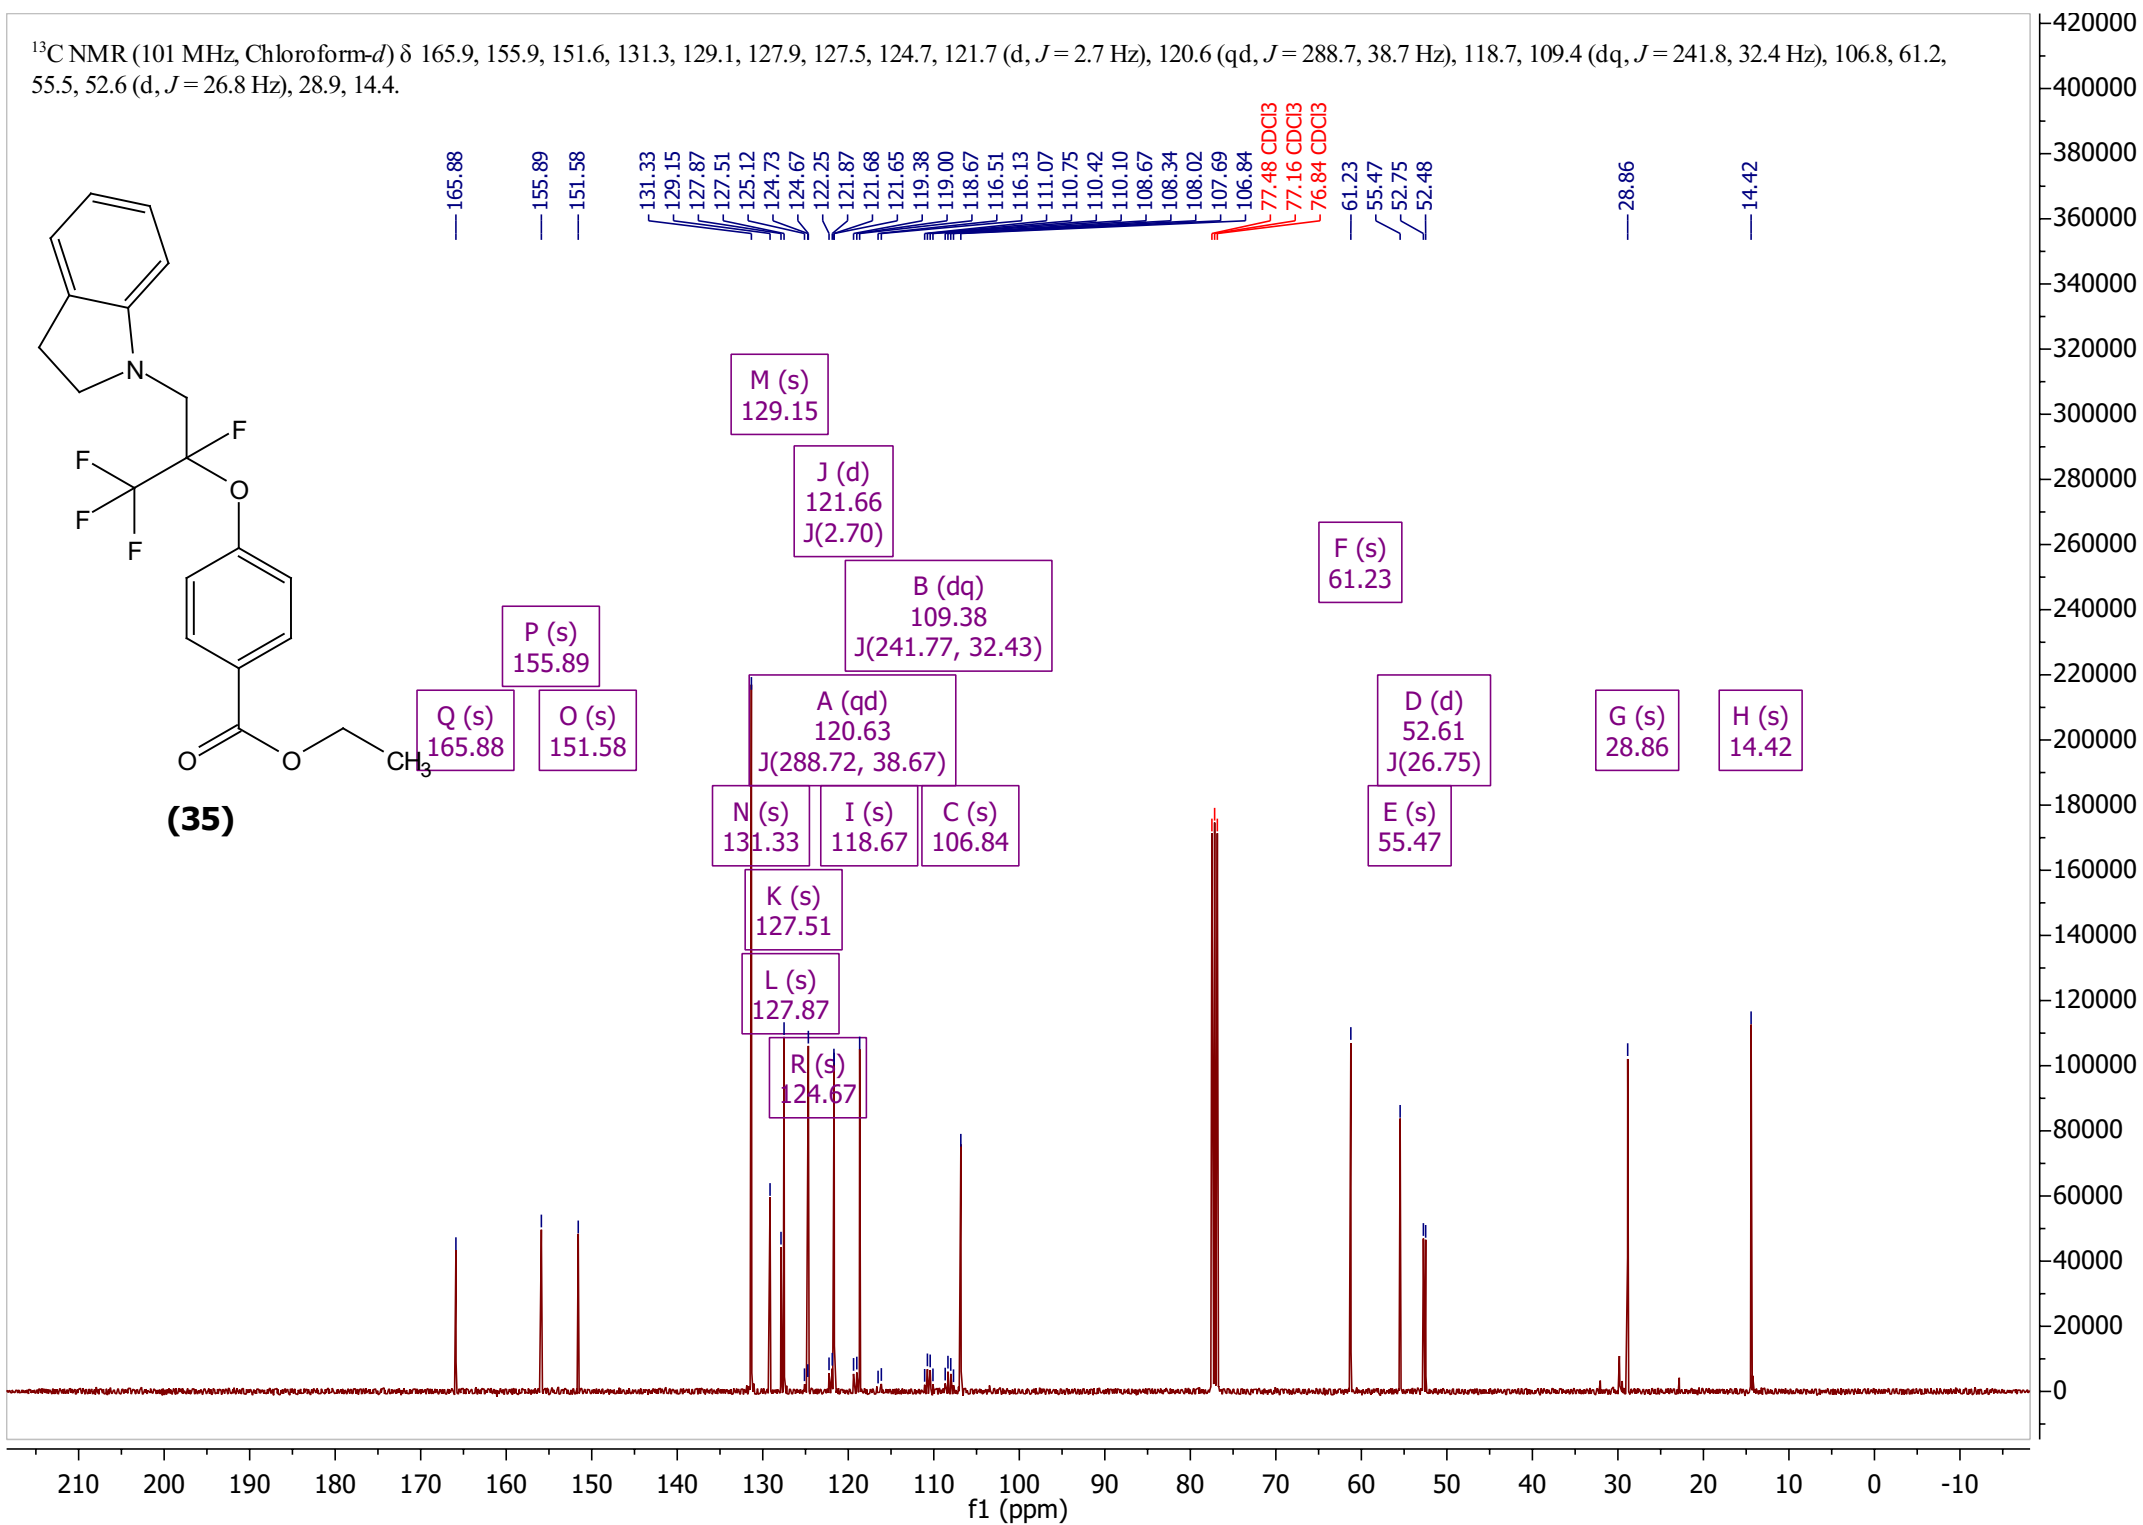

$^1\text{H}$  NMR (400 MHz, Chloroform-*d*)  $\delta$  7.92 (d,  $J = 8.8$  Hz, 2H), 7.16 (d,  $J = 8.4$  Hz, 2H), 7.08 – 6.93 (m, 2H), 6.87 – 6.82 (m, 1H), 4.28 (q,  $J = 7.1$  Hz, 2H), 3.64 (s, 2H), 3.07 (p,  $J = 14.7$  Hz, 2H), 2.81 – 2.66 (m, 4H), 1.30 (t,  $J = 7.2$  Hz, 3H).

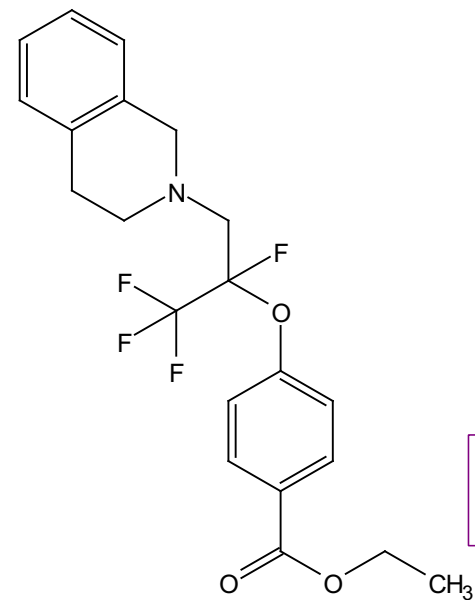

(36)

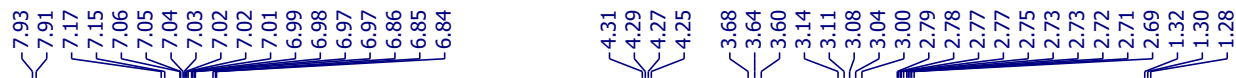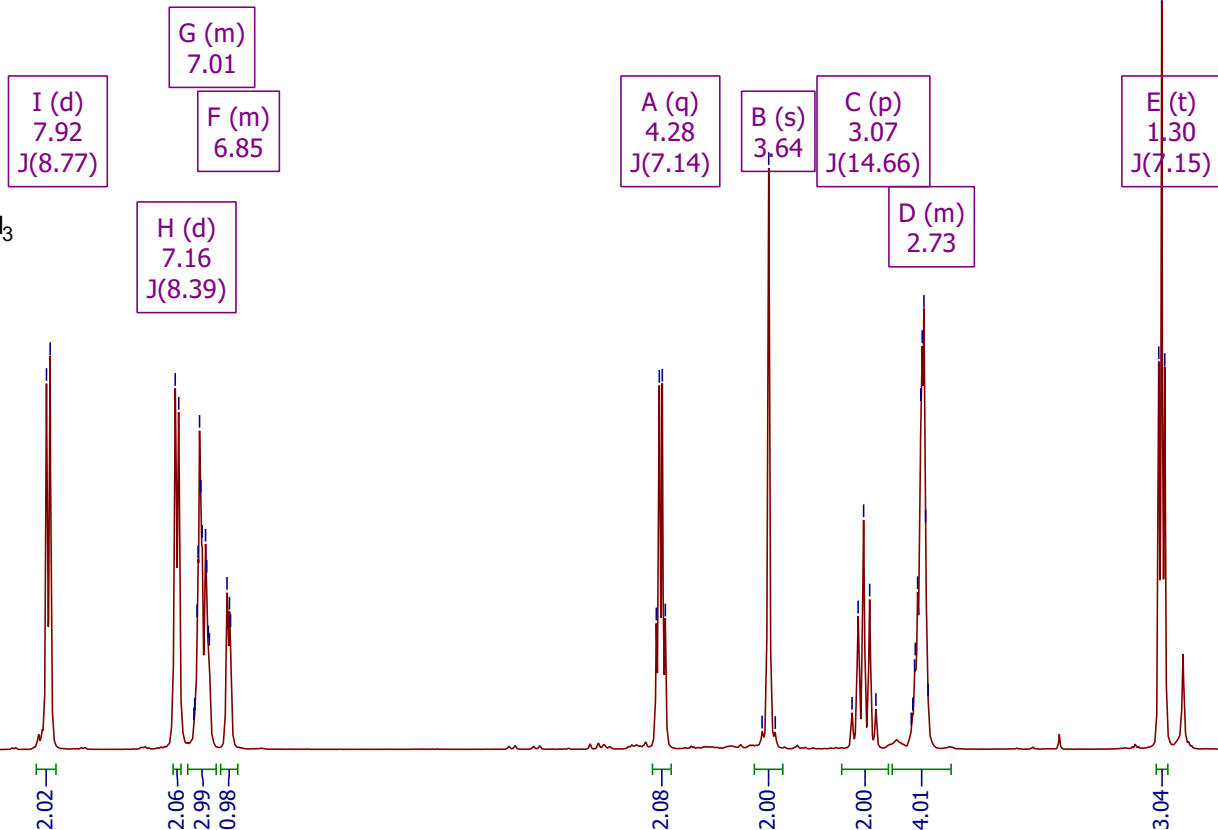

$^{19}\text{F}$  NMR (376 MHz, Chloroform-*d*)  $\delta$  -80.4 (d,  $J = 2.6$  Hz), -122.5 (q,  $J = 2.1$  Hz).

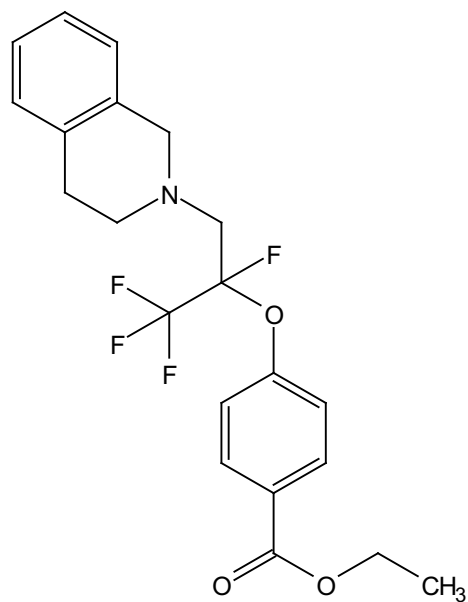

**(36)**

-80.37  
-80.38

-122.54  
-122.54  
-122.55  
-122.56

A (d)  
-80.38  
J(2.59)

B (q)  
-122.55  
J(2.07)

3.00

1.00

20 10 0 -10 -20 -30 -40 -50 -60 -70 -80 -90 -100 -110 -120 -130 -140 -150 -160 -170 -180 -190 -200 -210 -220  
f1 (ppm)

$8.0 \times 10^7$   
 $7.5 \times 10^7$   
 $7.0 \times 10^7$   
 $6.5 \times 10^7$   
 $6.0 \times 10^7$   
 $5.5 \times 10^7$   
 $5.0 \times 10^7$   
 $4.5 \times 10^7$   
 $4.0 \times 10^7$   
 $3.5 \times 10^7$   
 $3.0 \times 10^7$   
 $2.5 \times 10^7$   
 $2.0 \times 10^7$   
 $1.5 \times 10^7$   
 $1.0 \times 10^7$   
 $5.0 \times 10^6$   
0.0  
 $-5.0 \times 10^6$

$^{13}\text{C}$  NMR (101 MHz, Chloroform-*d*)  $\delta$  165.9, 156.1, 134.4, 134.0, 131.3, 128.8, 127.7, 126.5, 126.3, 125.8, 121.7 (d,  $J = 2.7$  Hz), 120.6 (qd,  $J = 287.6, 37.1$  Hz), 109.8 (dq,  $J = 240.5, 32.7$  Hz), 61.2, 57.4 (d,  $J = 26.3$  Hz), 56.7 (d,  $J = 1.5$  Hz), 52.0, 28.9, 14.4.

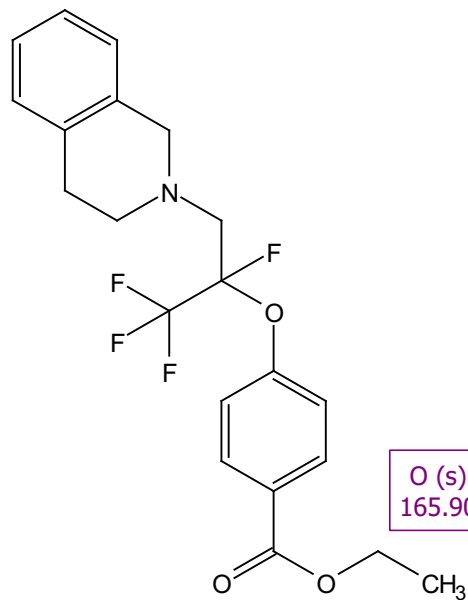

(36)

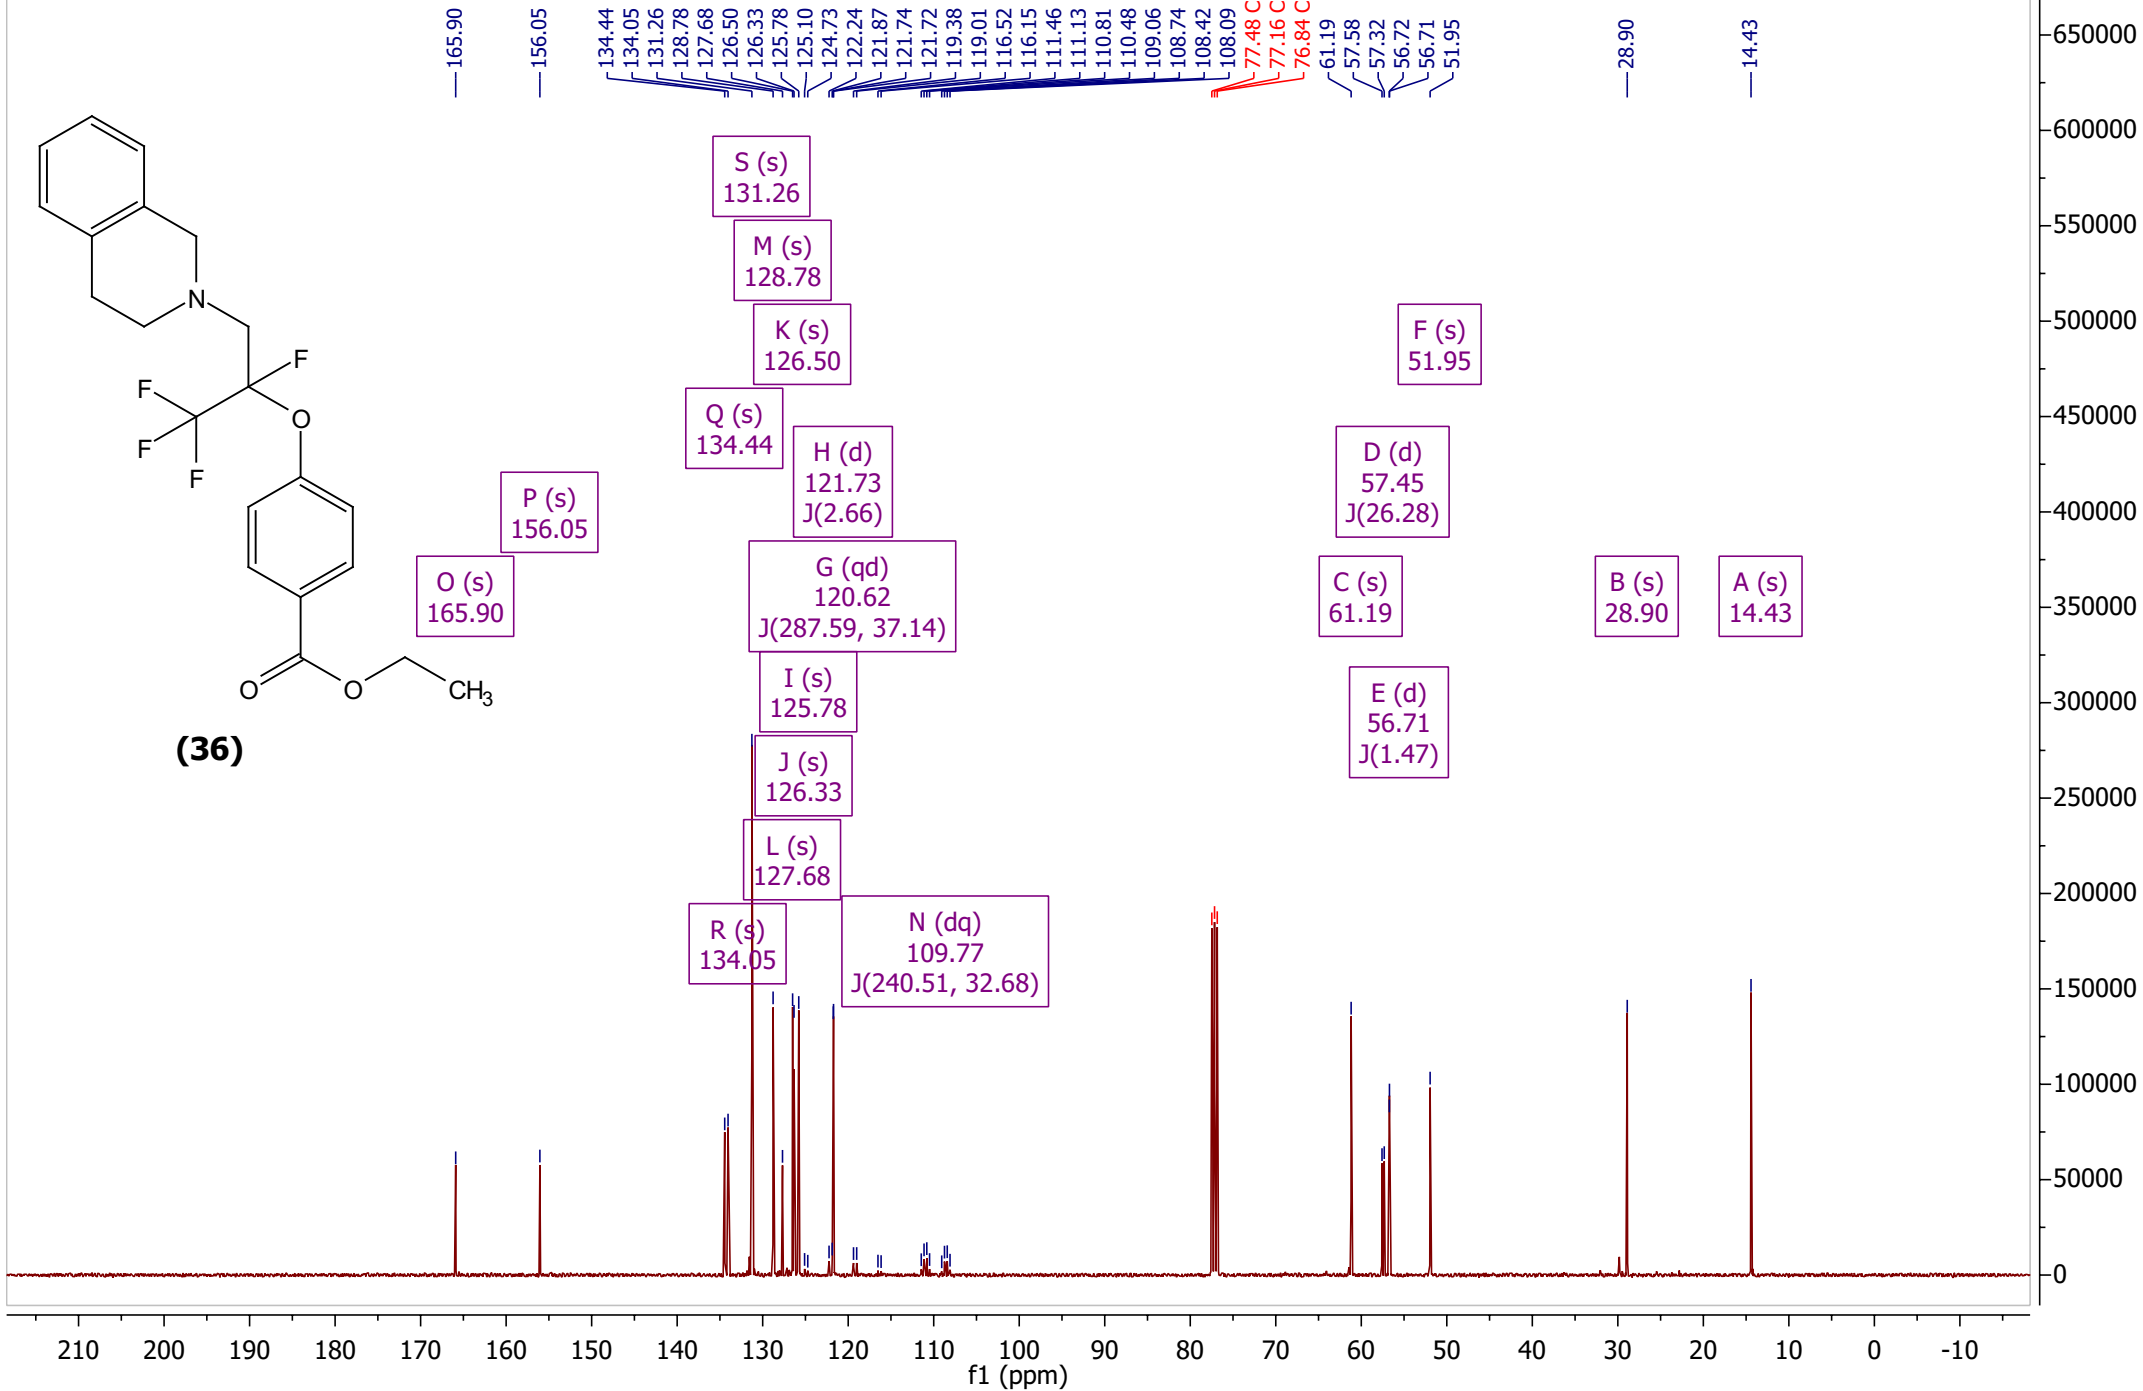



$^1\text{H NMR}$  (400 MHz, Chloroform-*d*)  $\delta$  7.94 (d,  $J = 8.7$  Hz, 2H), 7.23 – 7.08 (m, 7H), 4.30 (q,  $J = 7.1$  Hz, 2H), 3.72 – 3.62 (m, 2H), 3.18 – 3.03 (m, 2H), 1.54 (bs, 1H), 1.32 (t,  $J = 7.1$  Hz, 3H).

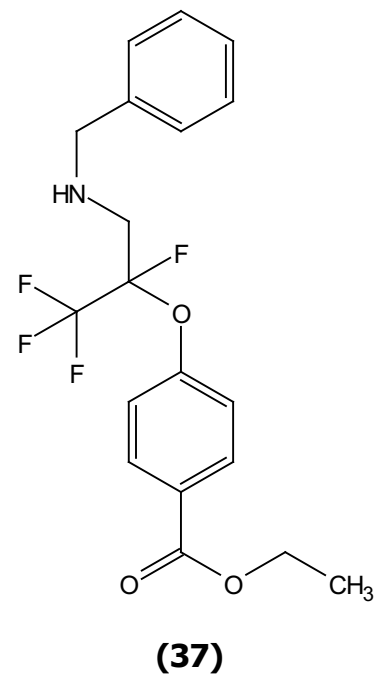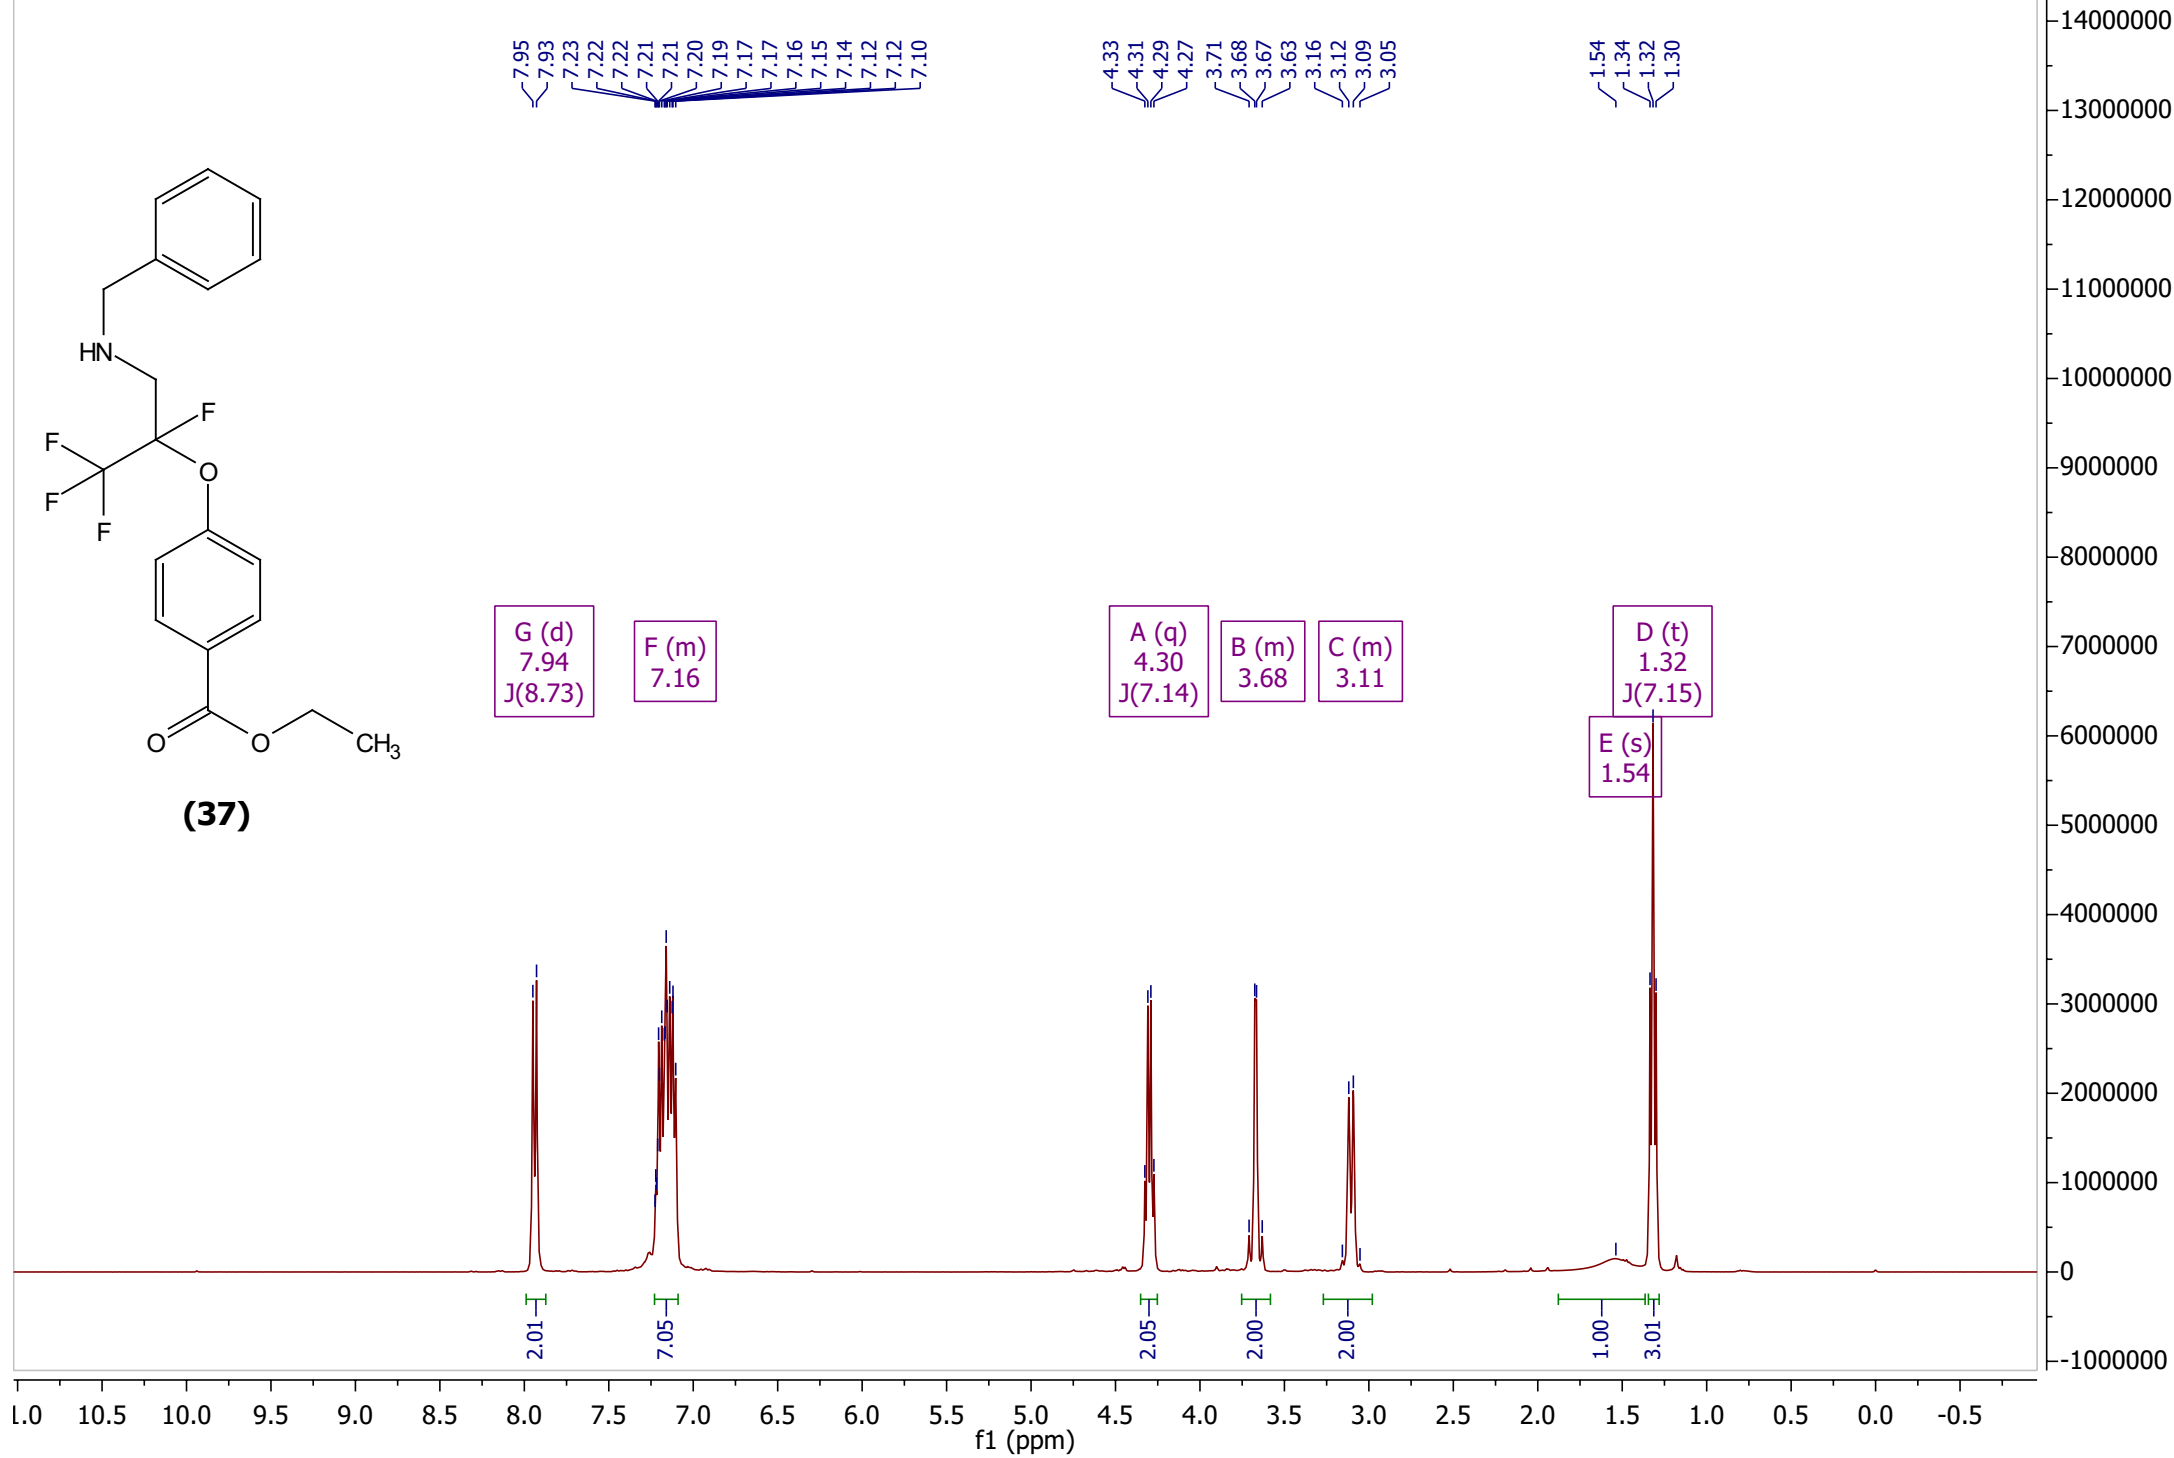

$^{19}\text{F}$  NMR (376 MHz, Chloroform-*d*)  $\delta$  -80.5 (d,  $J = 2.8$  Hz), -122.9 (q,  $J = 3.0$  Hz).

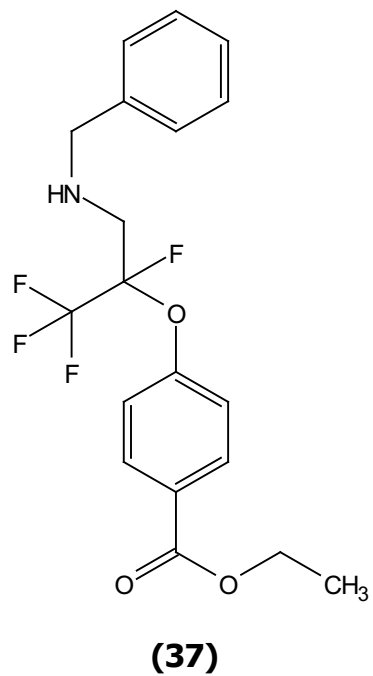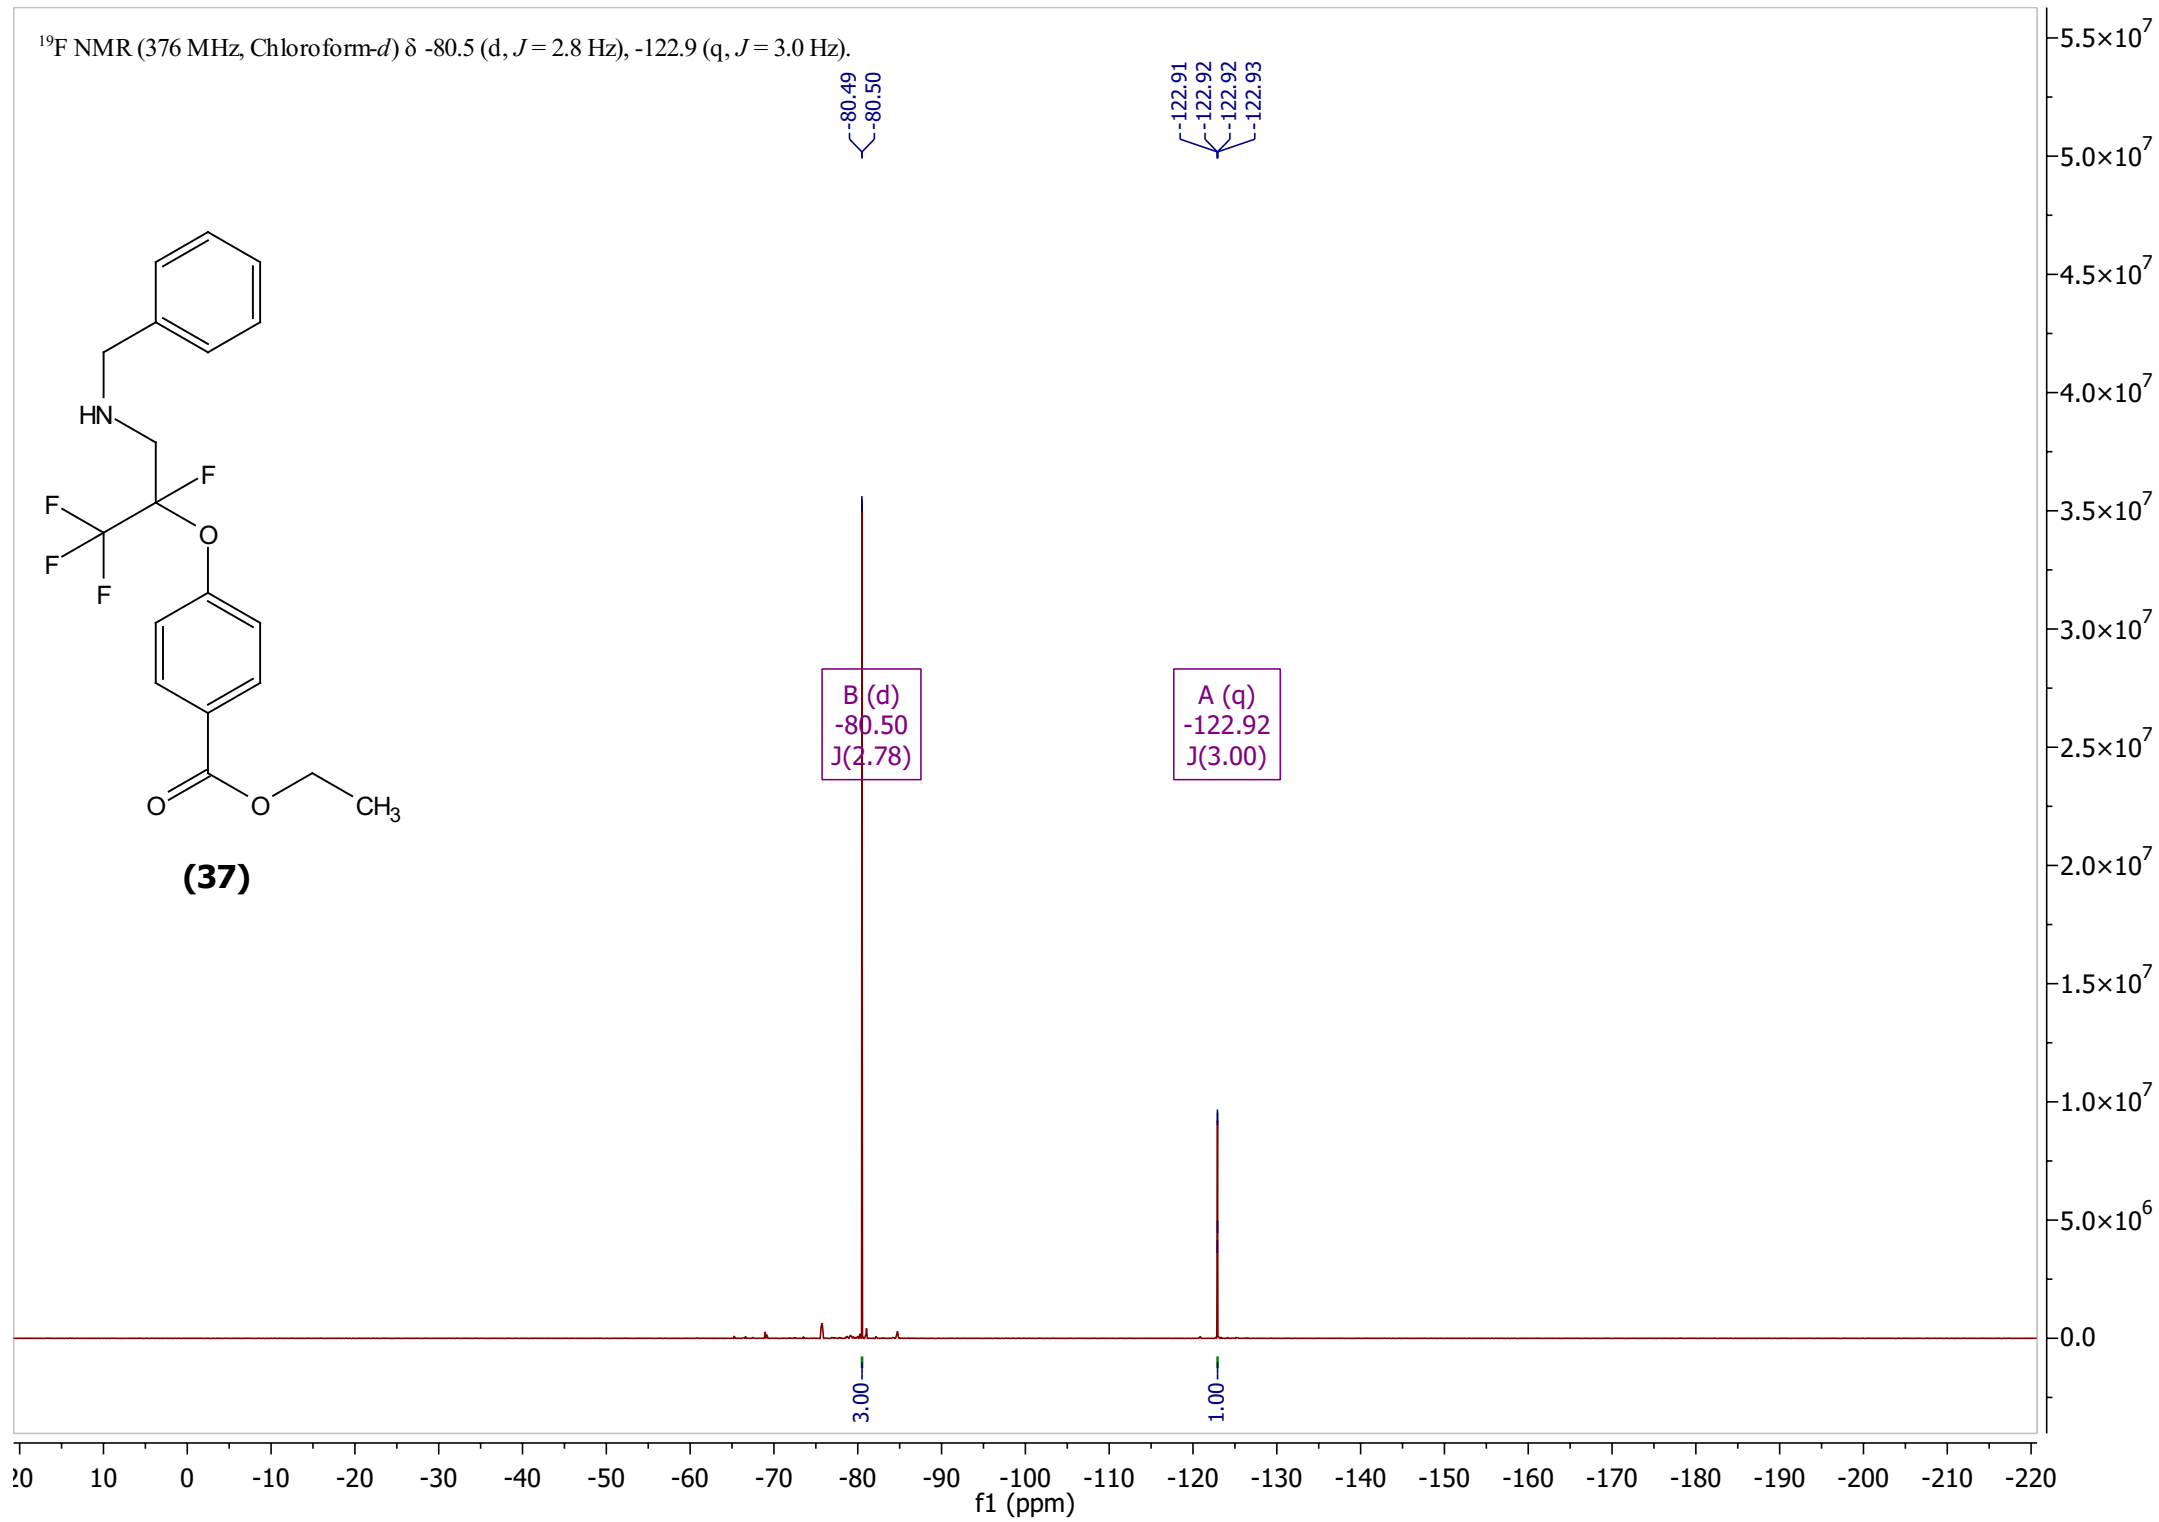

$^{13}\text{C}$  NMR (101 MHz, Chloroform-*d*)  $\delta$  165.9, 155.7, 139.3, 131.3, 128.6, 128.1, 127.9, 127.4, 121.8 (d,  $J = 2.6$  Hz), 120.6 (qd,  $J = 287.4, 37.2$  Hz), 109.5 (dq,  $J = 238.3, 33.0$  Hz), 61.2, 53.7, 48.5 (d,  $J = 28.8$  Hz), 14.4.

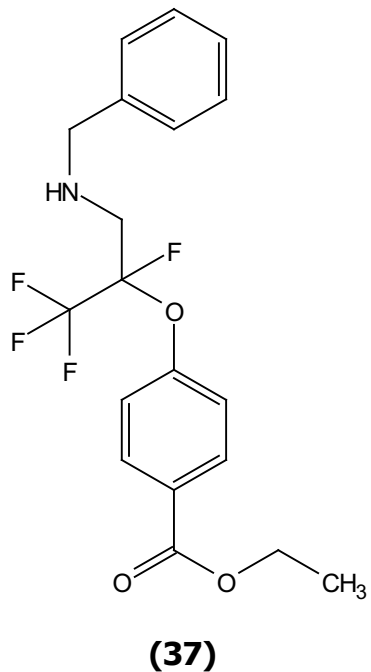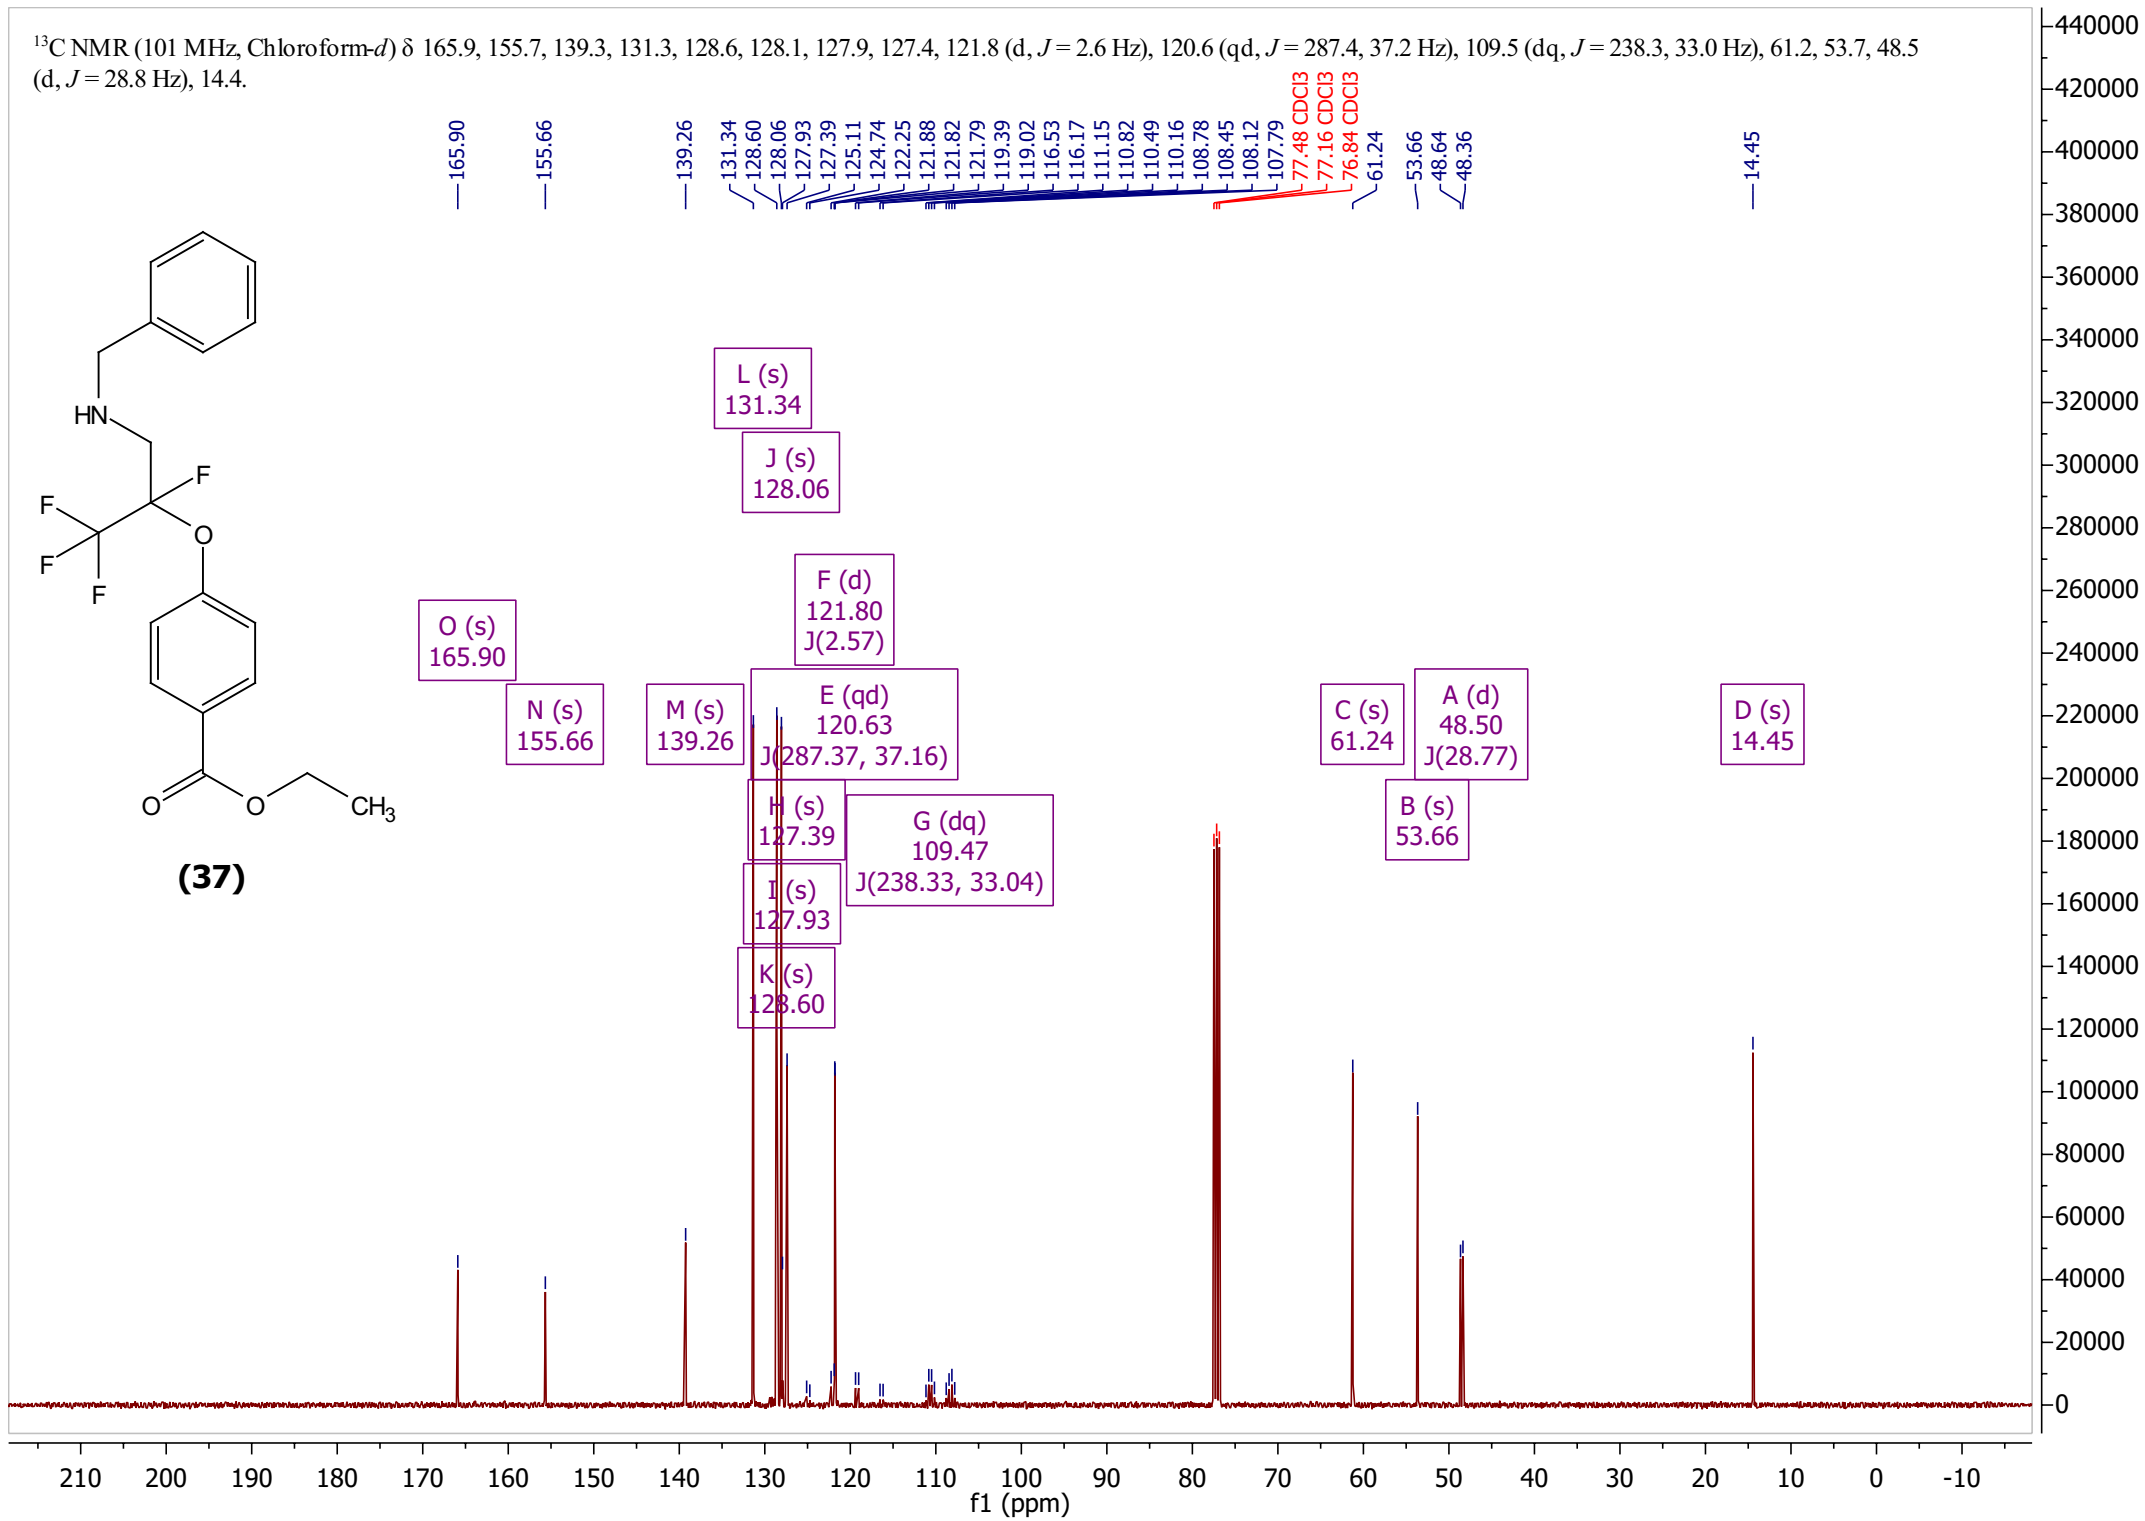

<sup>1</sup>H NMR (400 MHz, Chloroform-*d*) δ 8.11 (bs, 1H), 8.03 (d, *J* = 8.5 Hz, 2H), 7.23 (d, *J* = 8.4 Hz, 2H), 5.94 (bs, 1H), 4.34 (q, *J* = 7.1 Hz, 2H), 4.06 (s, 3H), 3.62 – 3.34 (m, 2H), 2.97 (t, *J* = 7.4 Hz, 1H), 2.32 (t, *J* = 7.6 Hz, 2H), 1.54 (h, *J* = 7.5 Hz, 2H), 1.35 (t, *J* = 7.2 Hz, 3H), 0.86 (t, *J* = 7.4 Hz, 3H).

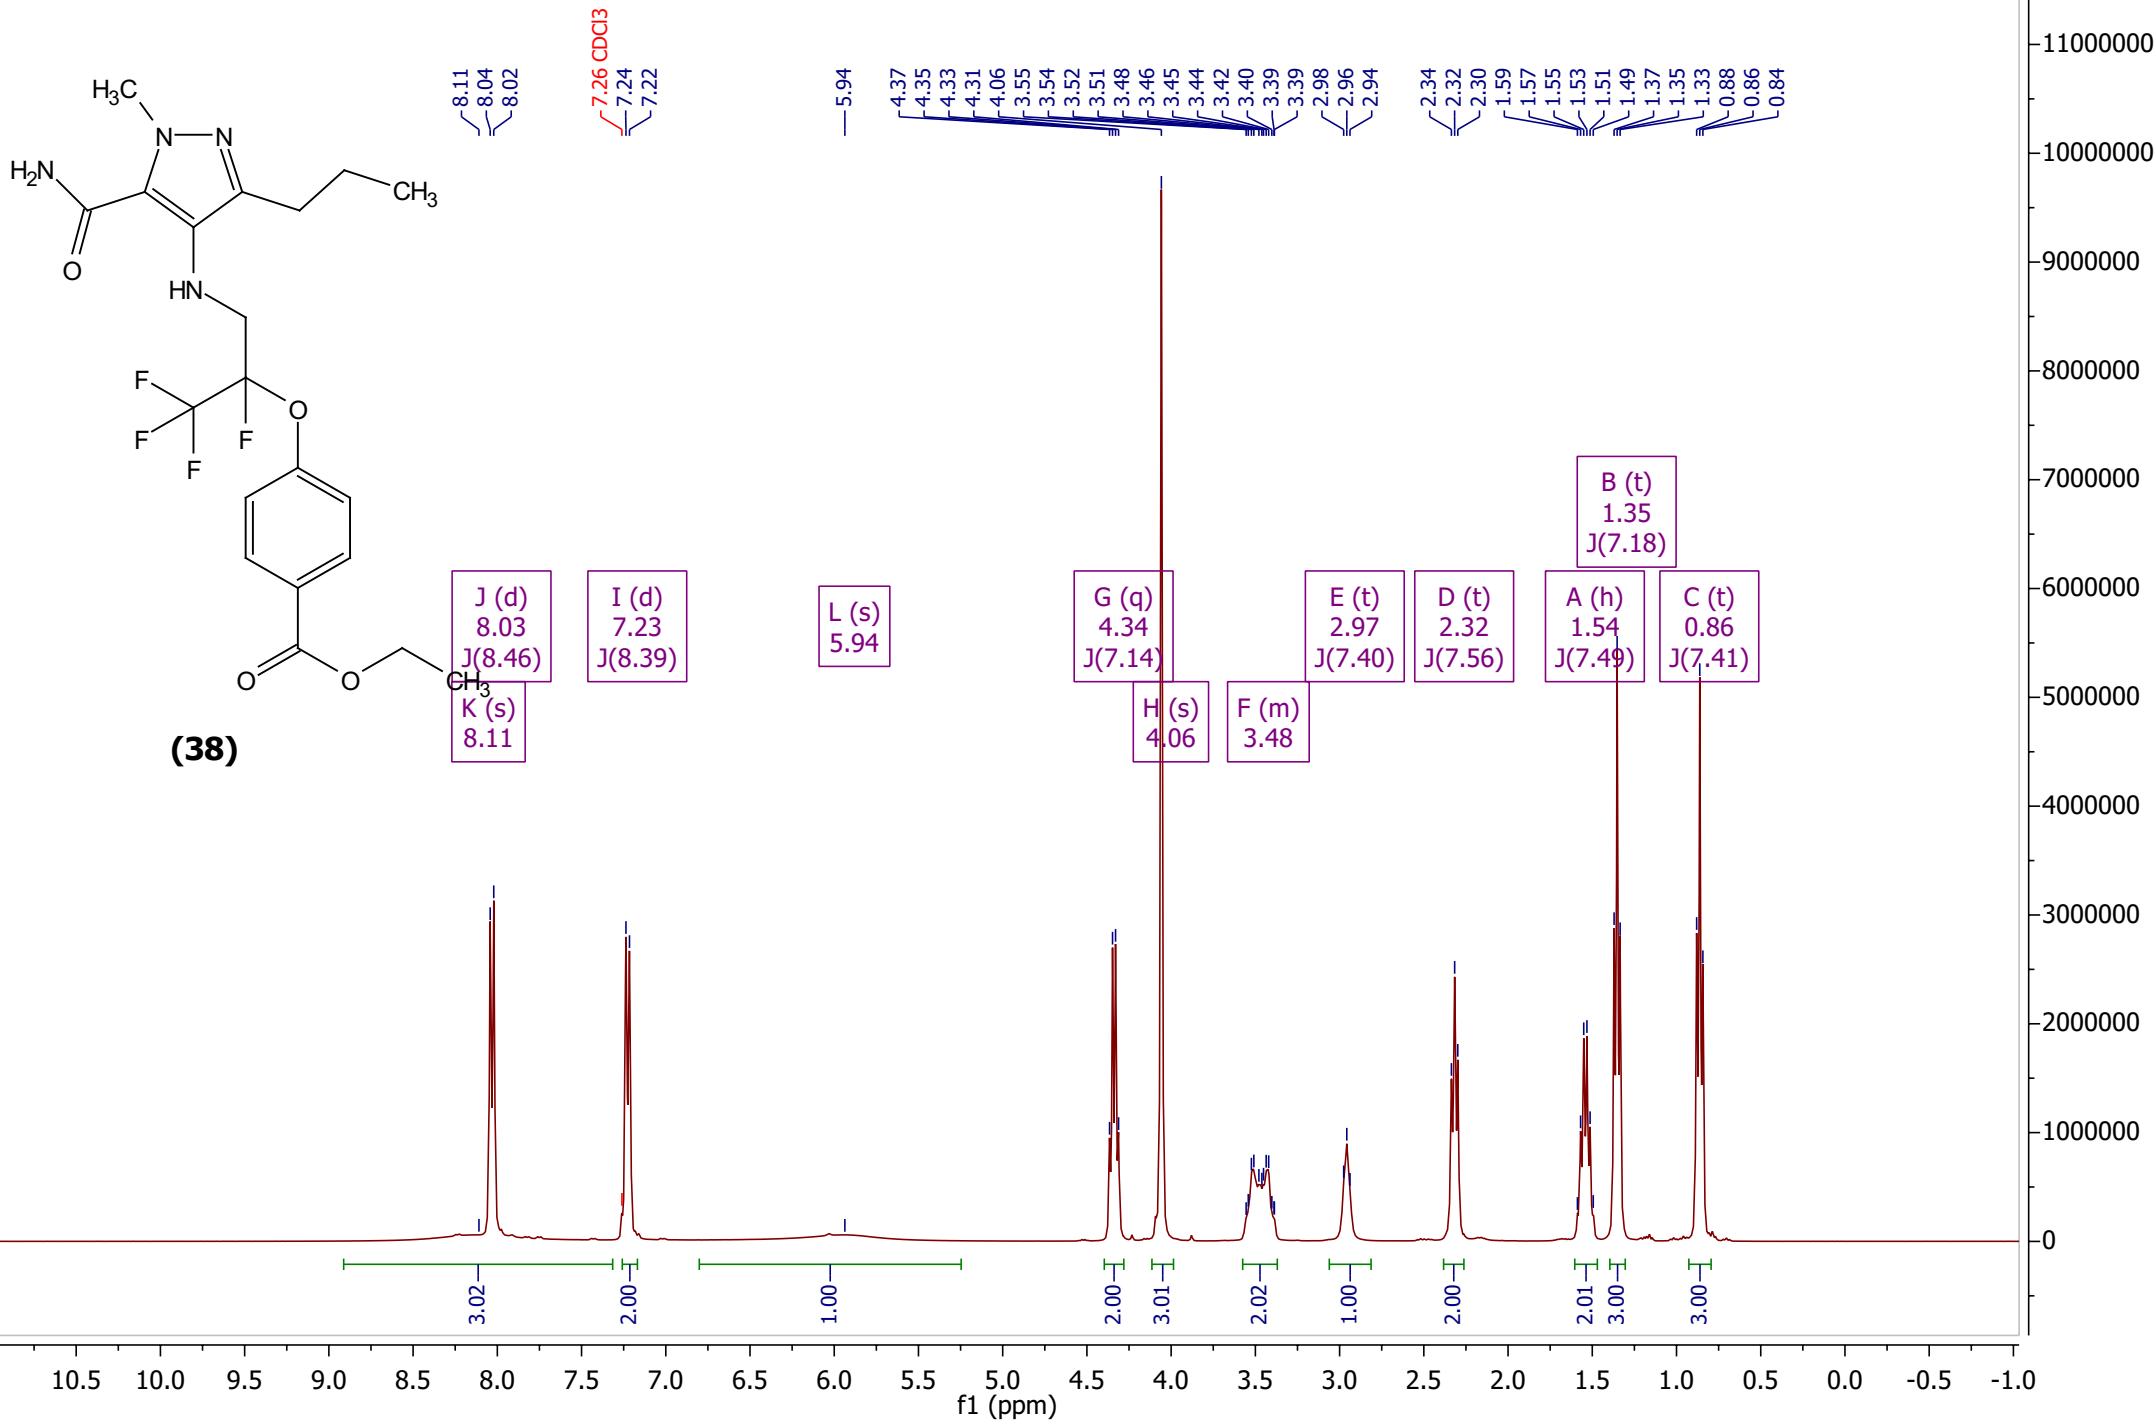

$^{19}\text{F}$  NMR (376 MHz, Chloroform-*d*)  $\delta$  -79.8 (d,  $J = 1.7$  Hz), -125.5.

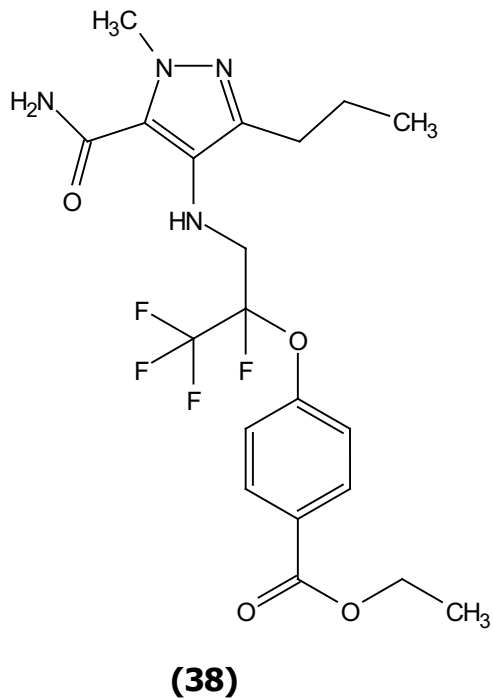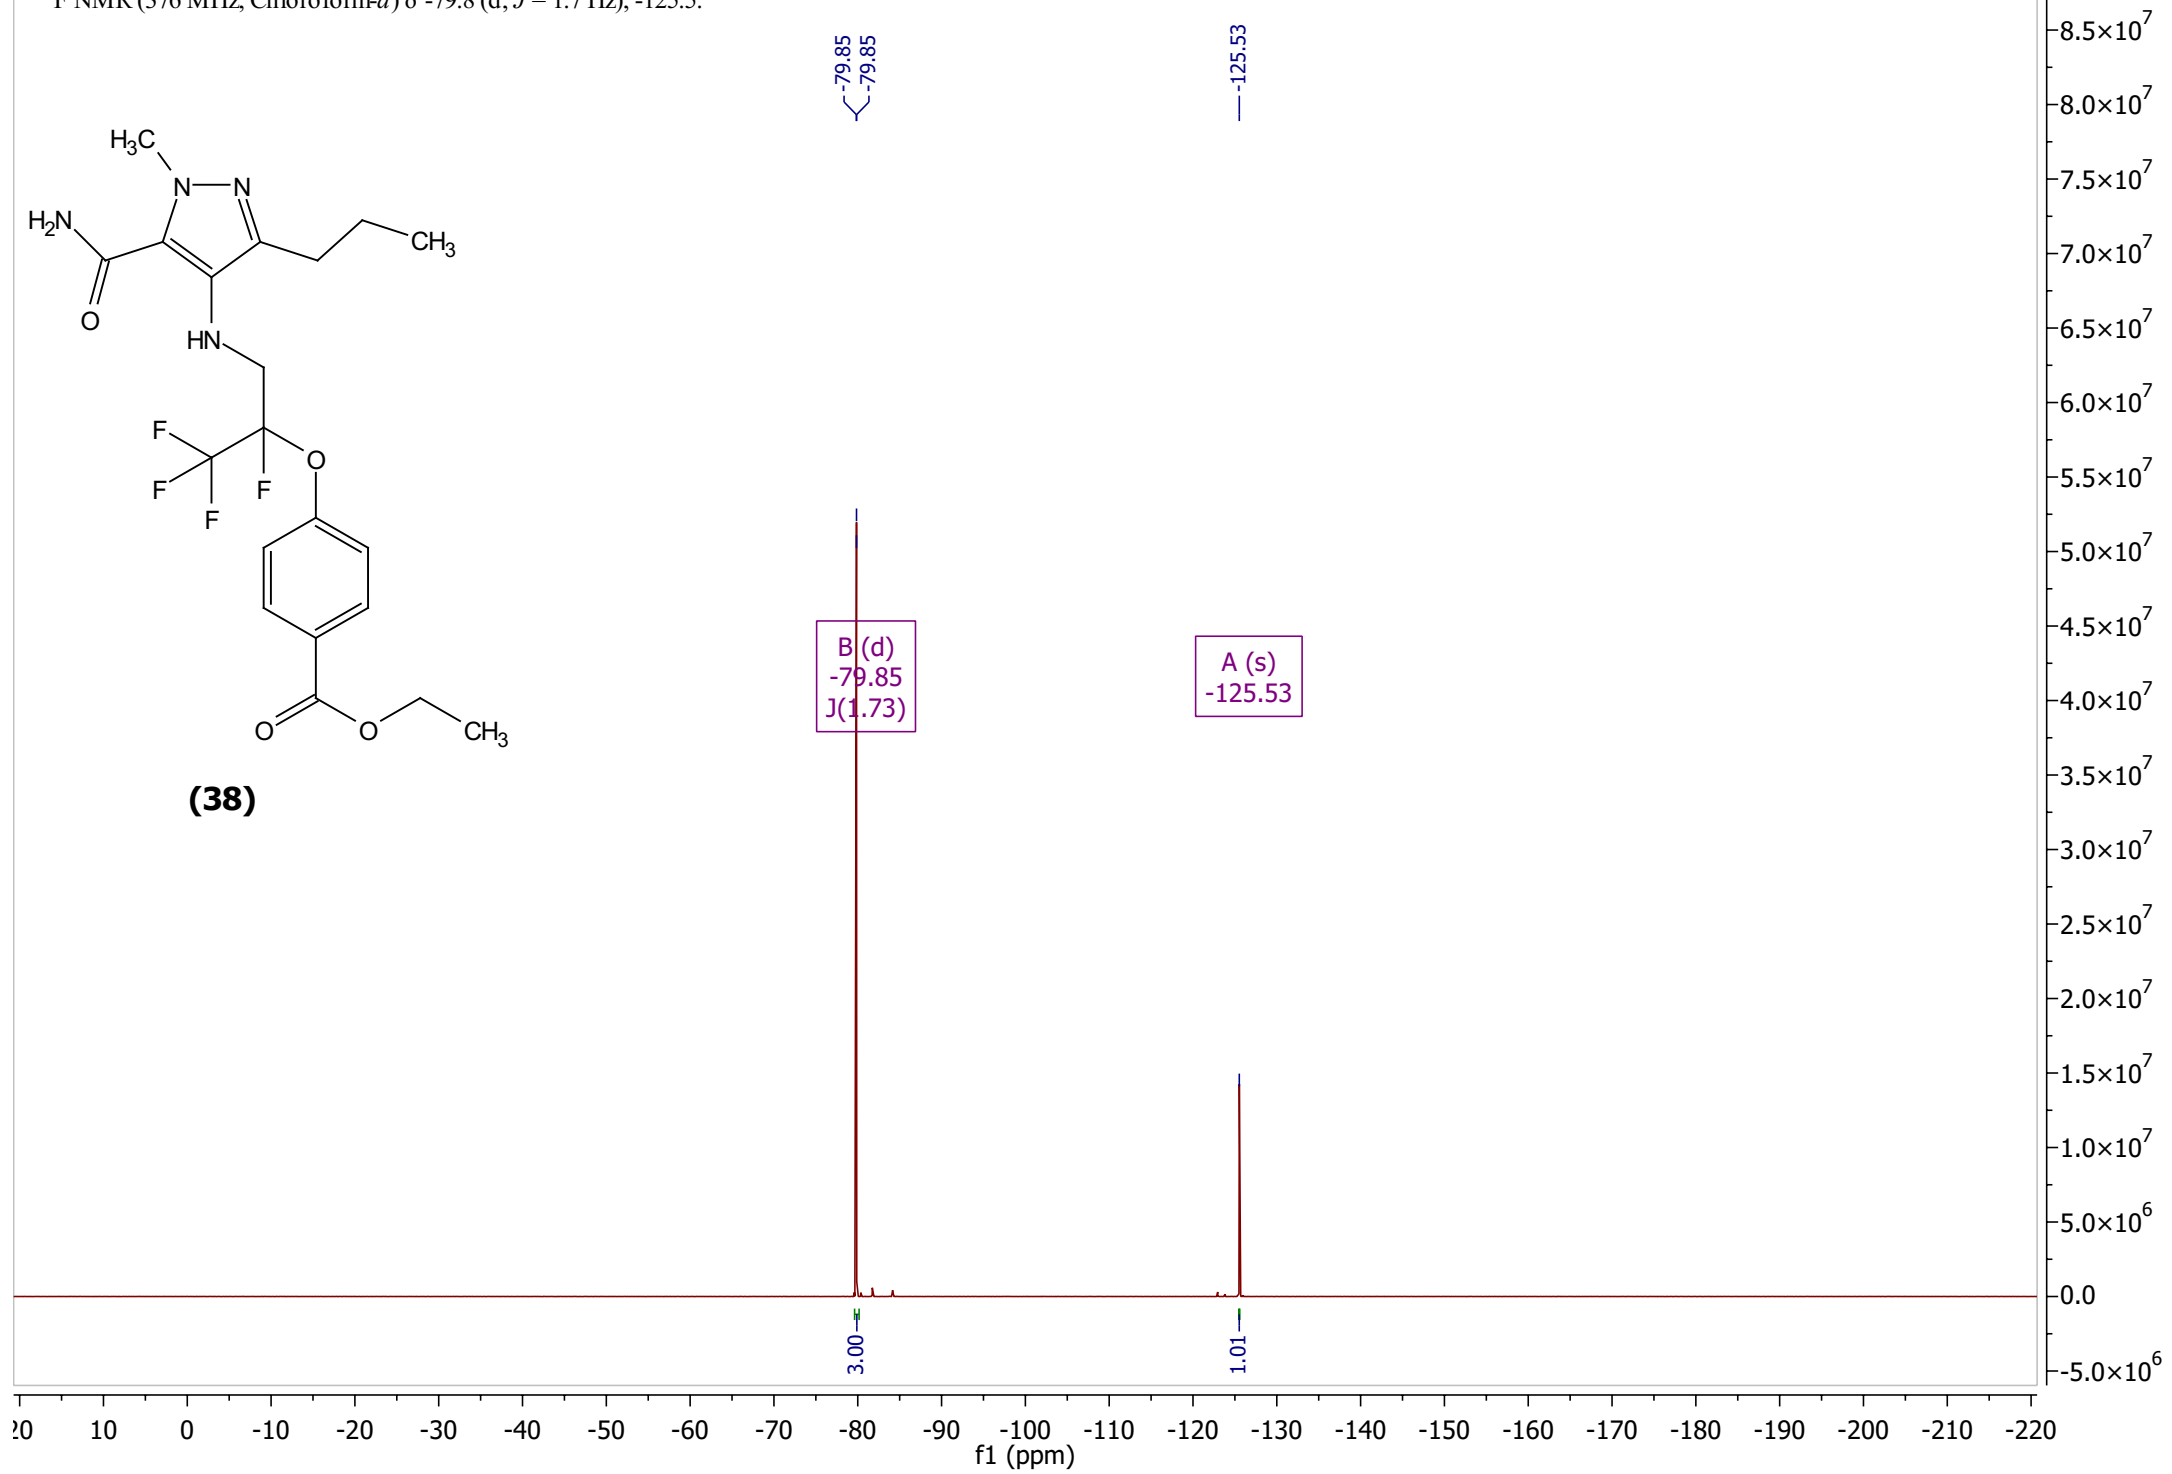

$^{13}\text{C}$  NMR (101 MHz, Chloroform-*d*)  $\delta$  165.5, 161.2, 155.2, 146.6, 131.6, 128.7, 128.5, 126.5, 121.3 (d,  $J = 2.9$  Hz), 120.4 (qd,  $J = 288.1, 38.1$  Hz), 108.3 (dq,  $J = 240.4, 34.0$  Hz), 61.3, 50.9 (d,  $J = 27.0$  Hz), 40.1, 27.6, 22.5, 14.3, 14.0.

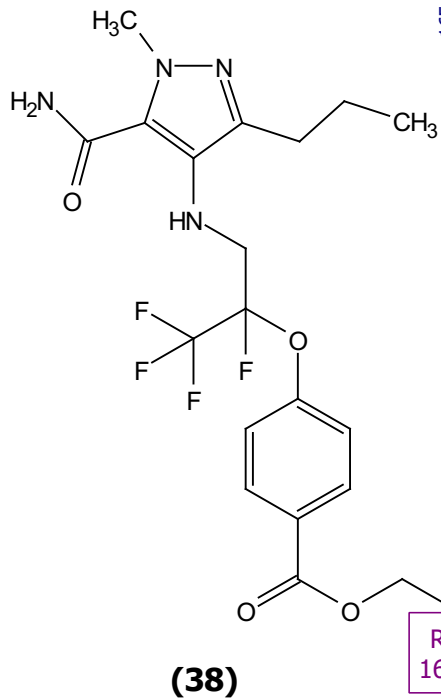

(38)

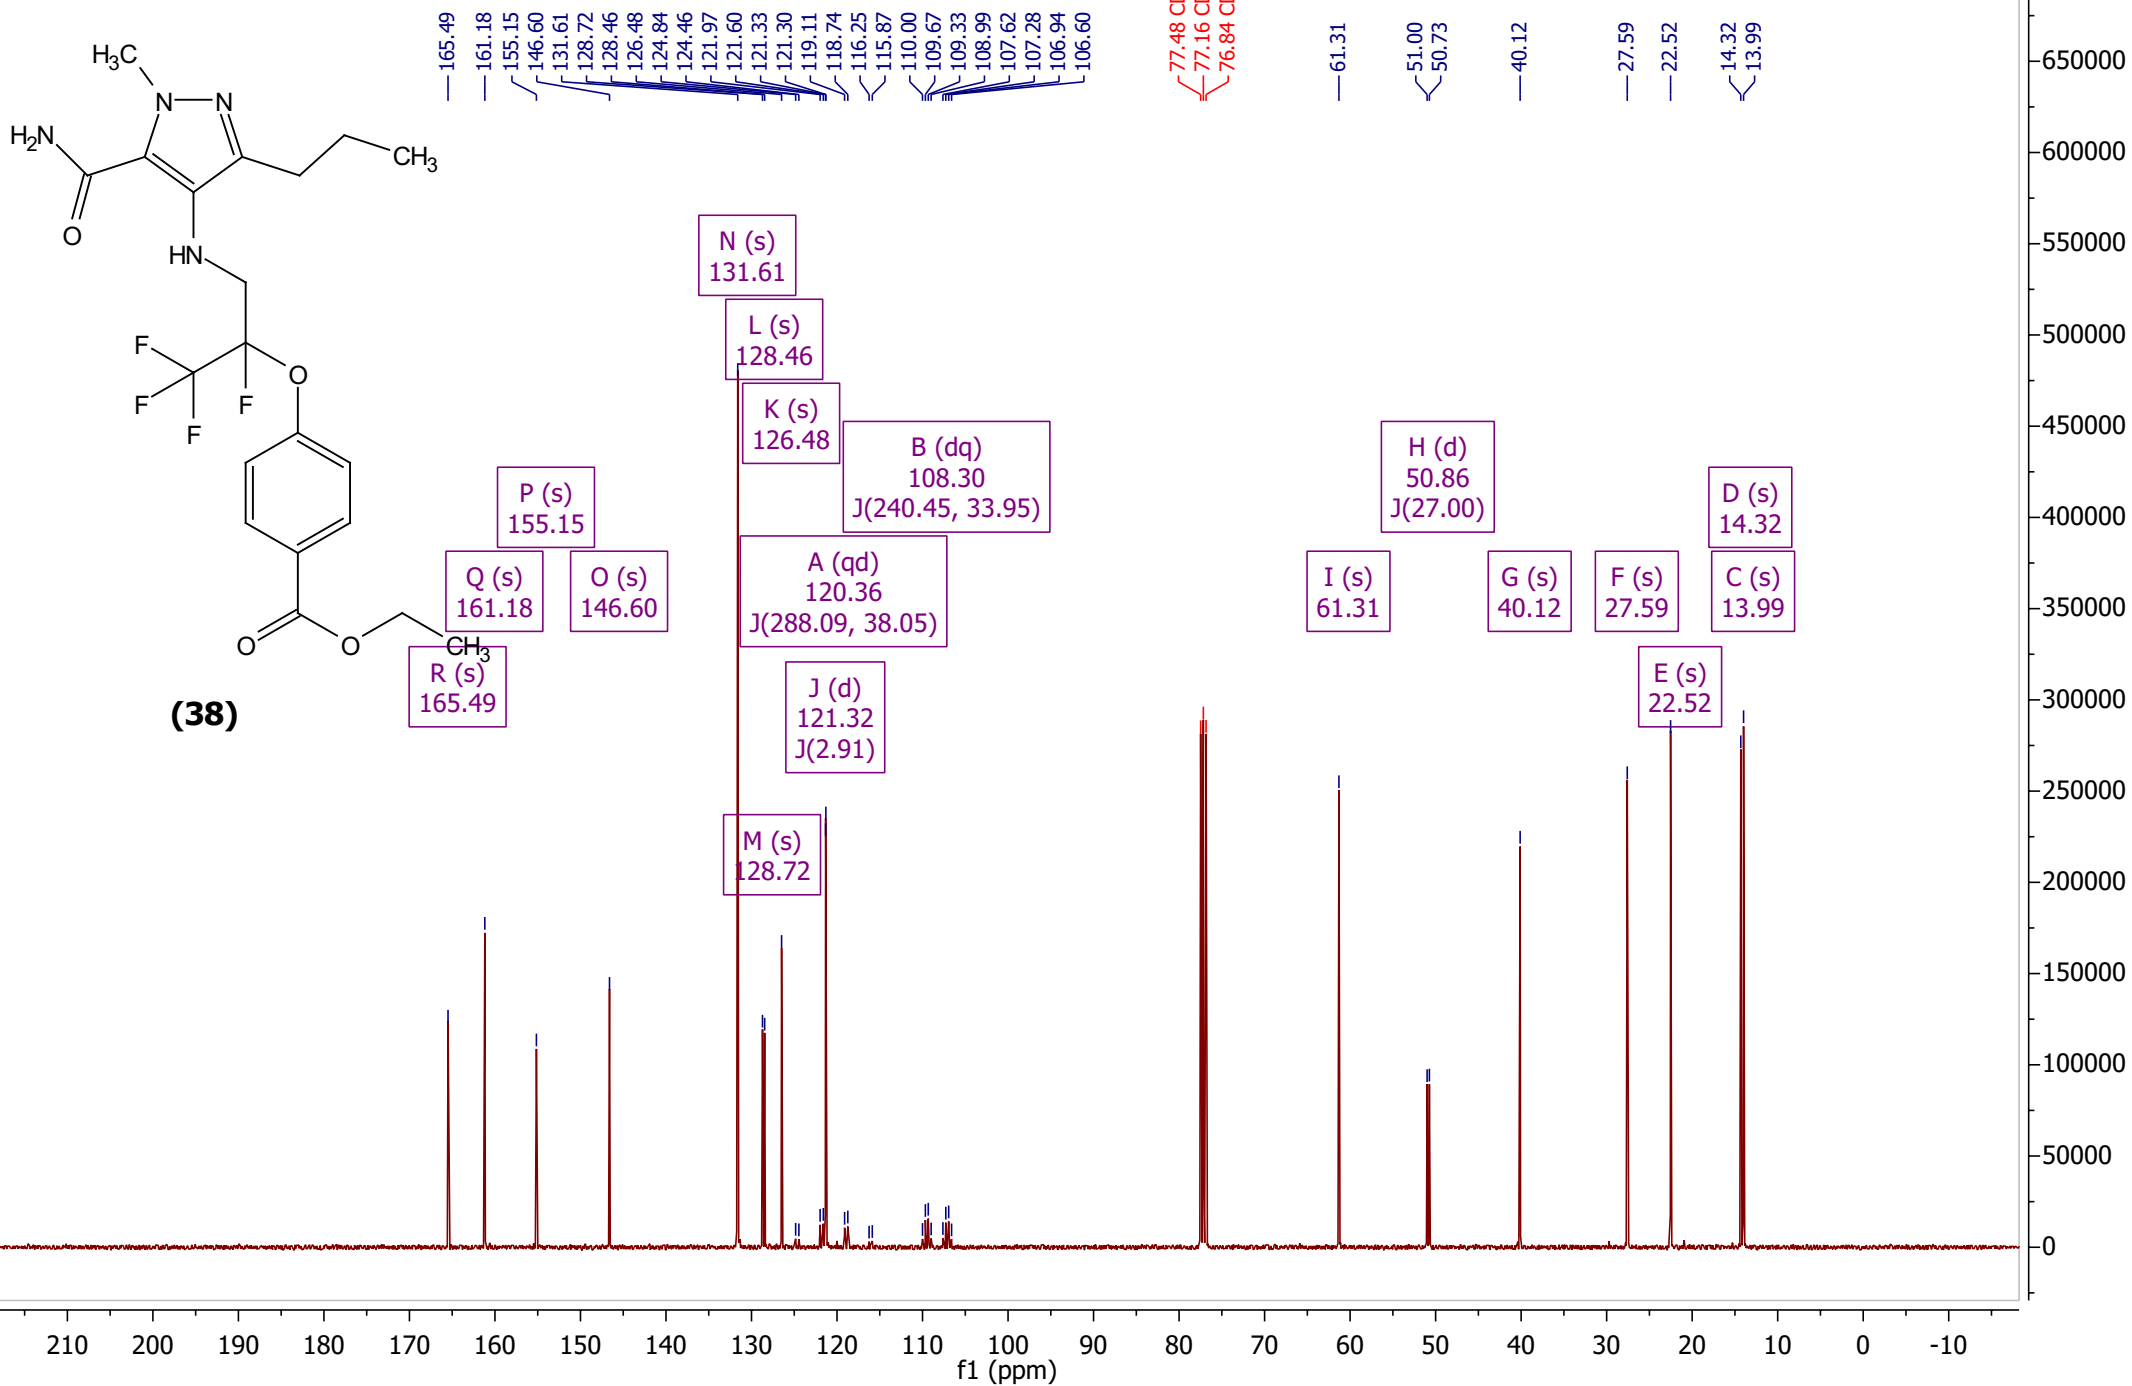

$^1\text{H}$  NMR (400 MHz, Chloroform-*d*)  $\delta$  8.01 (d,  $J = 8.8$  Hz, 2H), 7.77 (d,  $J = 7.1$  Hz, 2H), 7.49 (d,  $J = 2.5$  Hz, 1H), 7.40 (t,  $J = 7.6$  Hz, 2H), 7.32 (dt,  $J = 7.5, 1.4$  Hz, 1H), 7.18 (d,  $J = 8.5$  Hz, 2H), 6.60 (d,  $J = 2.5$  Hz, 1H), 4.85 (dd,  $J = 15.3, 10.0$  Hz, 1H), 4.76 (t,  $J = 15.2$  Hz, 1H), 4.35 (q,  $J = 7.2$  Hz, 2H), 1.38 (t,  $J = 7.2$  Hz, 3H).

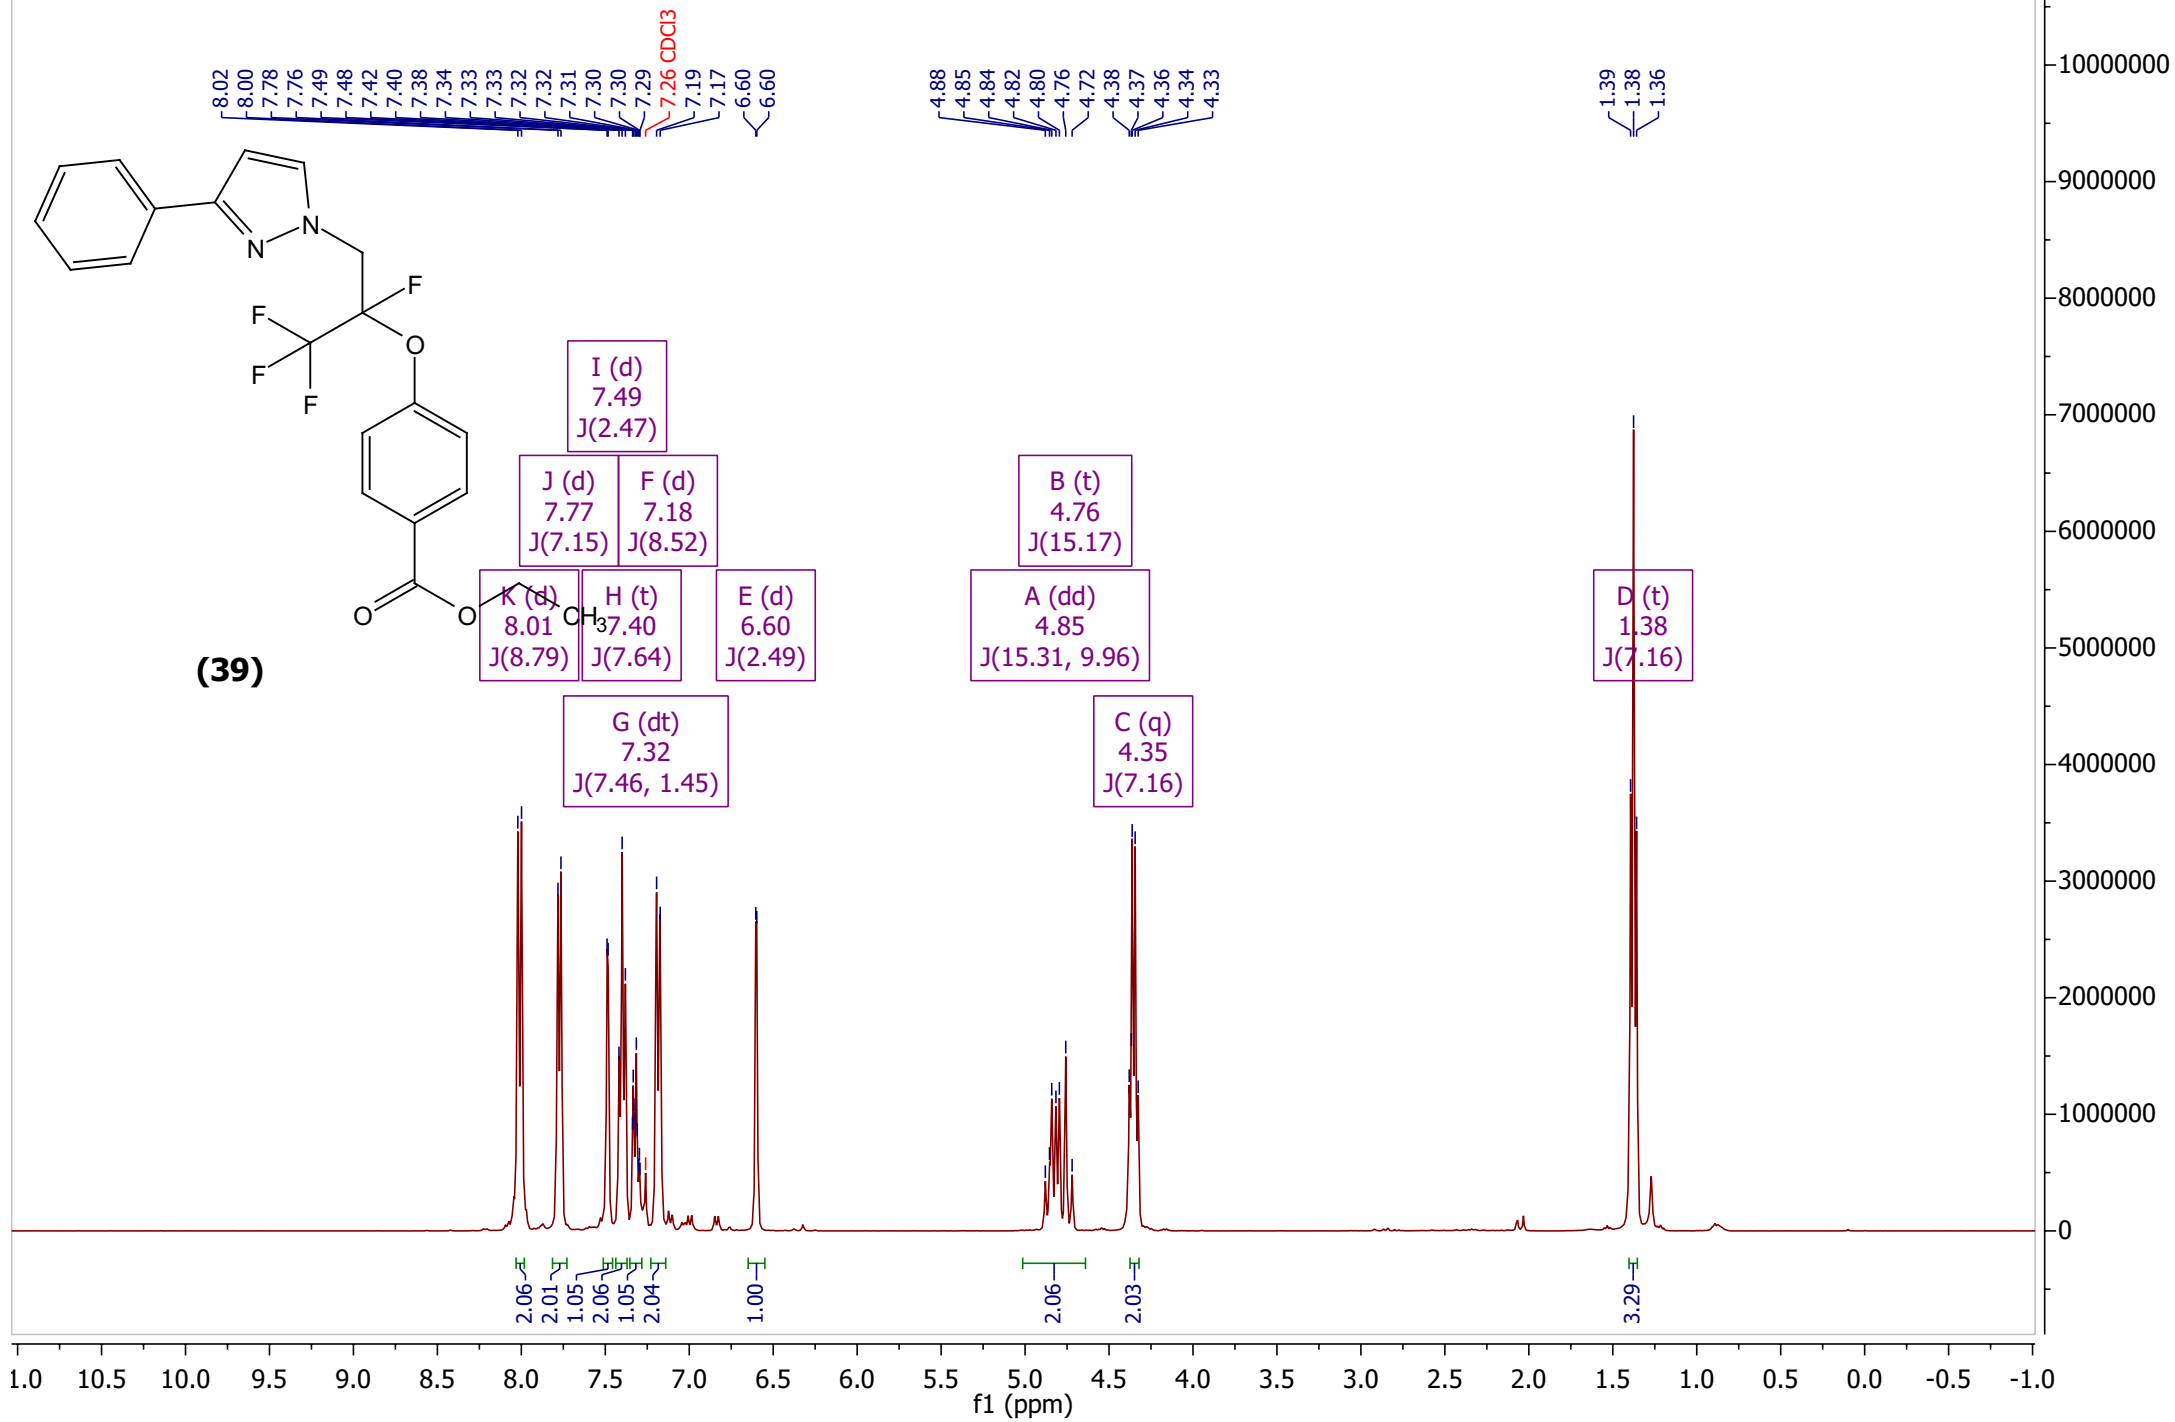

$^{19}\text{F}$  NMR (376 MHz, Chloroform-*d*)  $\delta$  -80.2 (d,  $J = 2.7$  Hz), -125.2 (q,  $J = 2.9$  Hz).

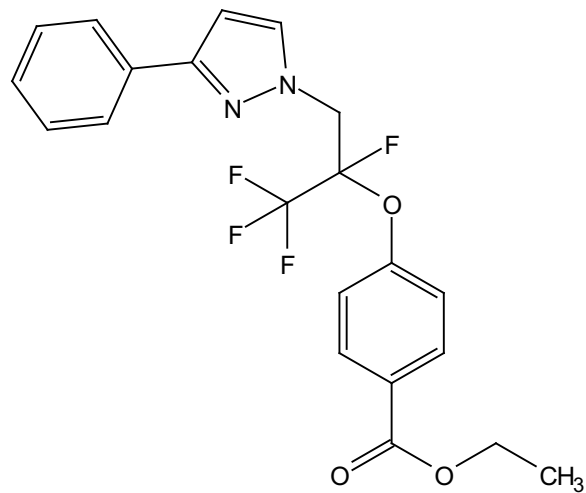

-80.17  
-80.18

-125.22  
-125.23  
-125.23  
-125.24

B (d)  
-80.18  
J(2.66)

A (q)  
-125.23  
J(2.89)

3.00

1.00





$^{13}\text{C}$  NMR (101 MHz, Chloroform-*d*)  $\delta$  165.7, 155.1, 152.5, 133.0, 132.5, 131.3, 128.7, 128.3, 128.1, 125.9, 121.9 (d,  $J = 2.5$  Hz), 120.1 (qd,  $J = 288.6, 37.5$  Hz), 107.2 (dq,  $J = 243.0, 34.0$  Hz), 104.4, 61.2, 52.3 (d,  $J = 28.3$  Hz), 14.4.

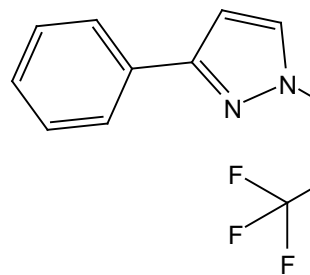

**(39)**

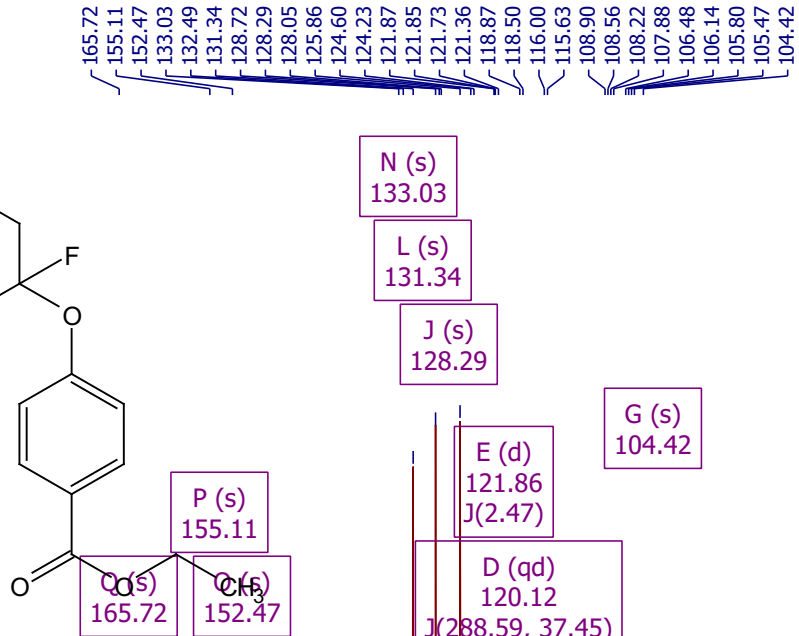

77.48 CDCl3  
77.16 CDCl3  
76.84 CDCl3

61.23  
52.43  
52.15

14.38

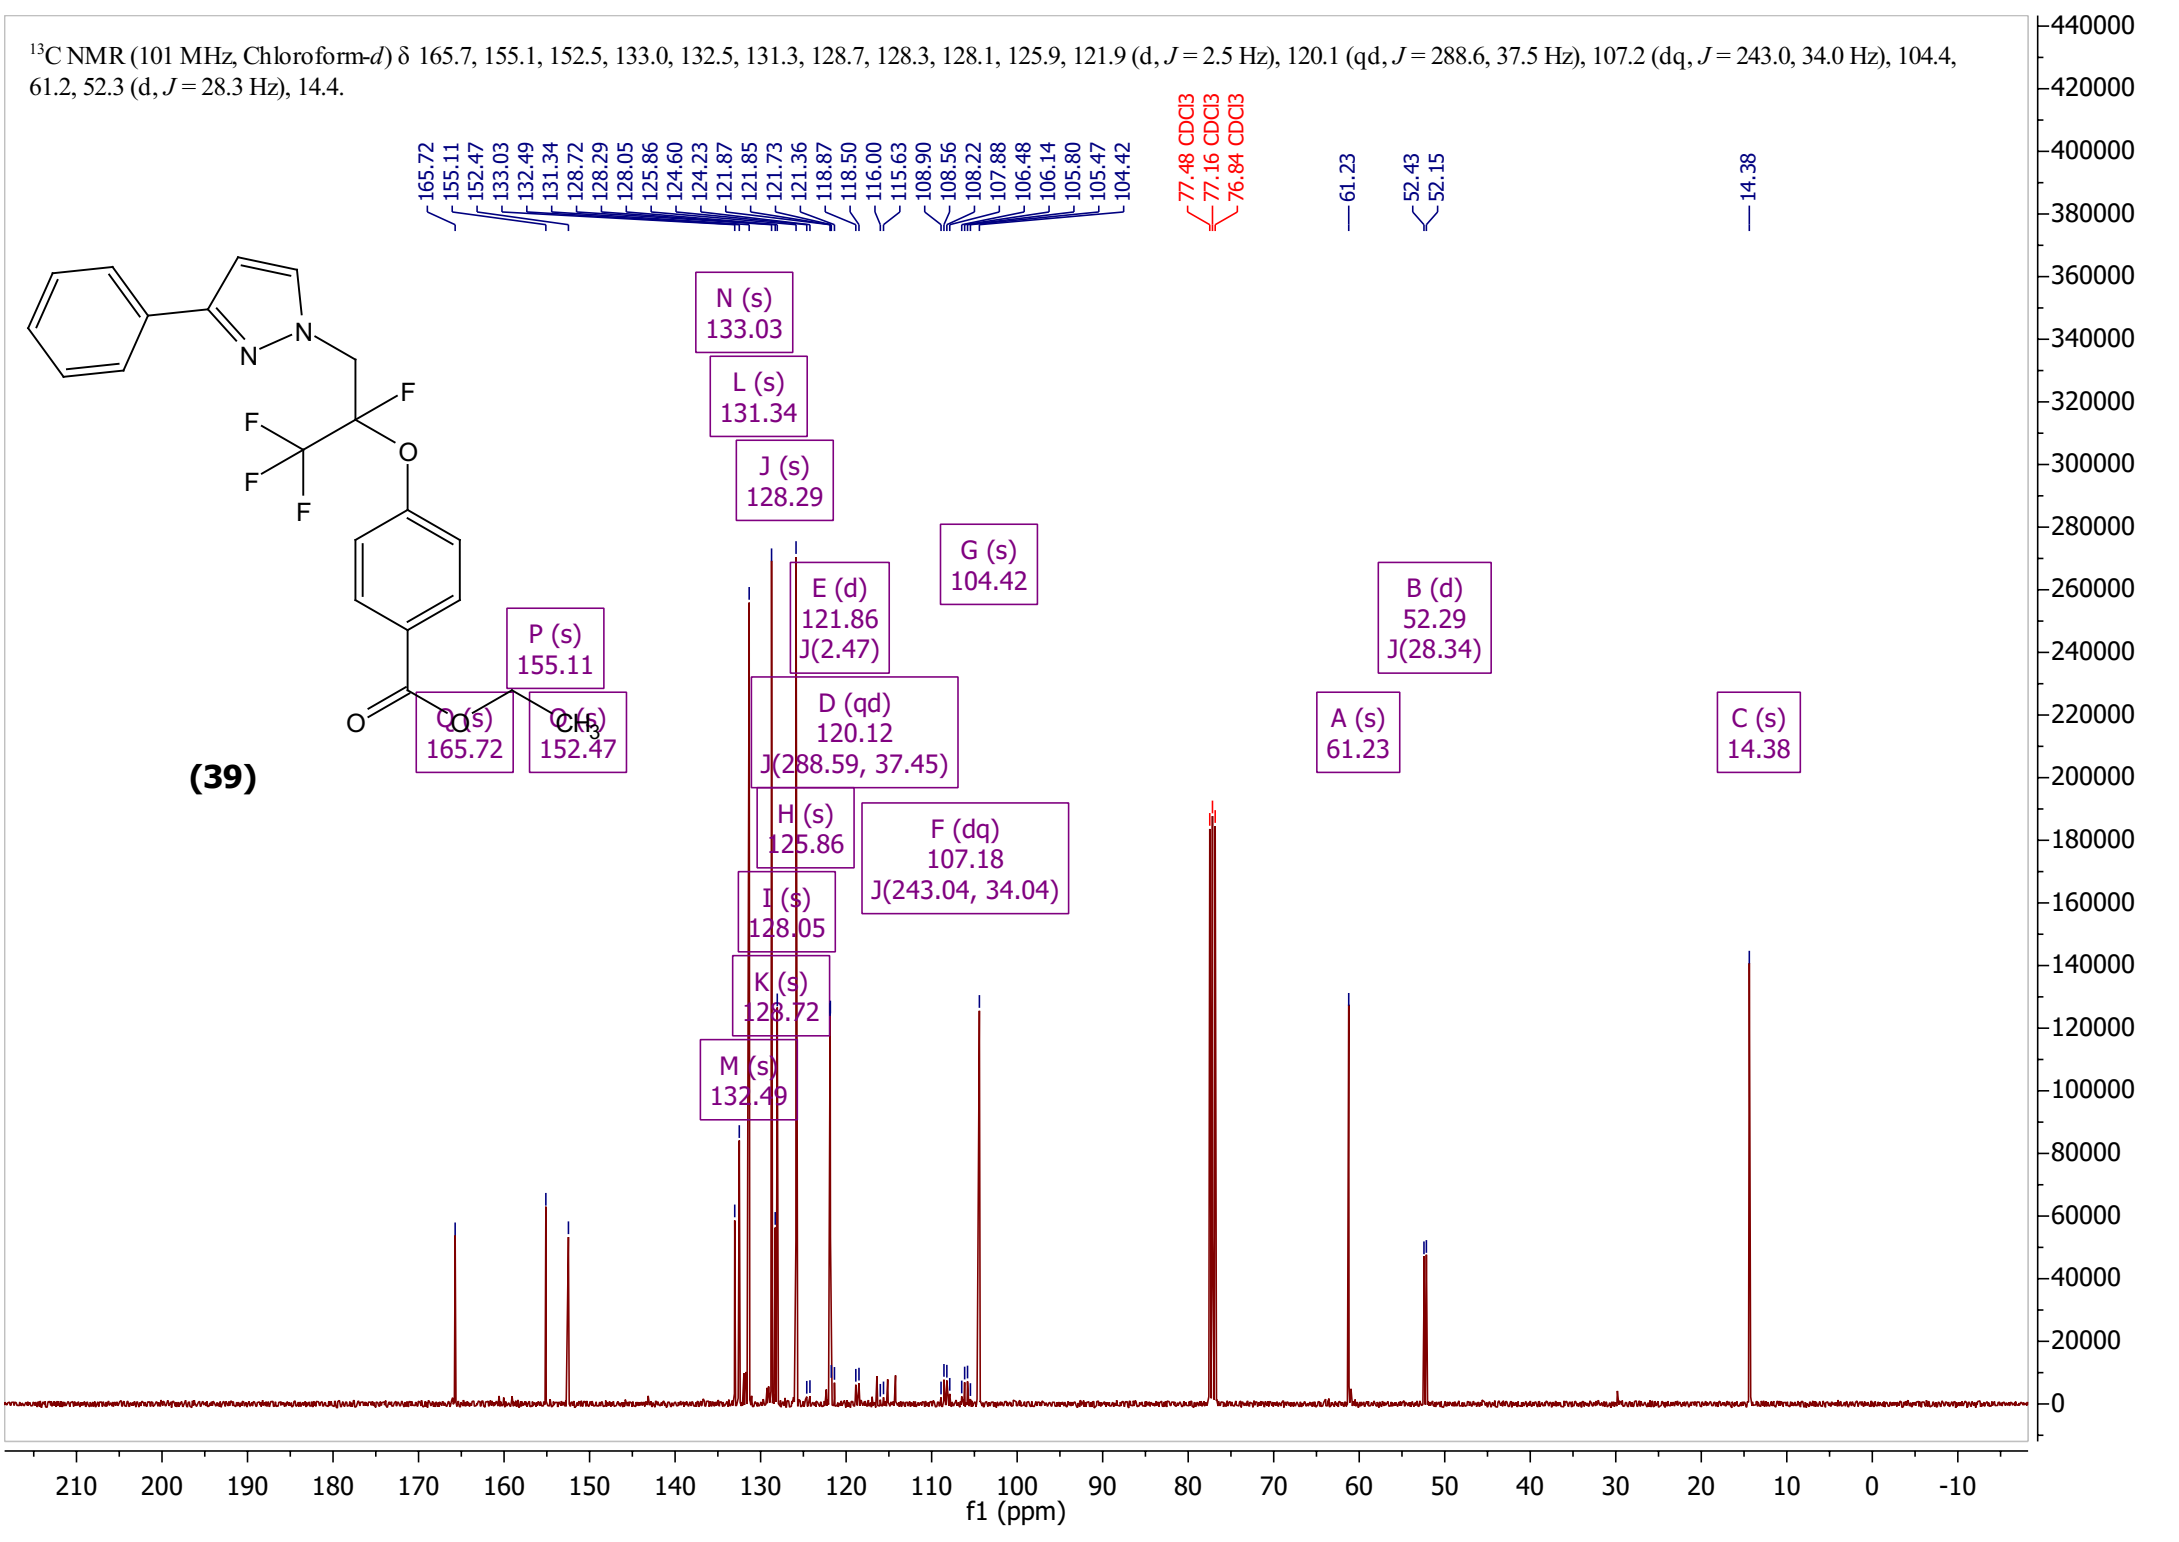

<sup>1</sup>H NMR (400 MHz, Chloroform-*d*) δ 8.20 (dd, *J* = 4.6, 1.9 Hz, 1H), 7.58 (dt, *J* = 8.3, 2.0 Hz, 1H), 7.39 (d, *J* = 8.6 Hz, 2H), 7.22 (dd, *J* = 8.2, 4.6 Hz, 1H), 6.36 (d, *J* = 8.4 Hz, 2H), 3.97 (s, 1H), 3.82 (d, *J* = 12.6 Hz, 2H).

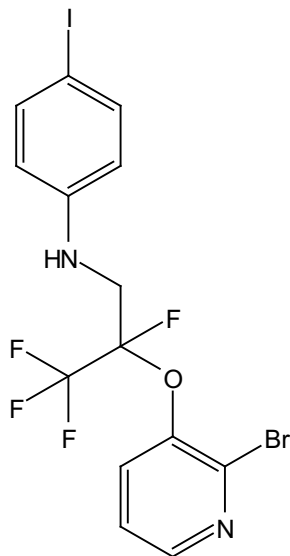

(40)

8.21  
8.20  
8.20  
8.19  
7.60  
7.59  
7.59  
7.58  
7.57  
7.57  
7.40  
7.38  
7.26 CDCl<sub>3</sub>  
7.24  
7.23  
7.22  
7.21  
6.37  
6.35

3.97  
3.83  
3.80

E (dt)  
7.58  
J(8.26, 1.97)

D (dd)  
8.20  
J(4.59, 1.90)

F (d)  
7.39  
J(8.63)

G (dd)  
7.22  
J(8.18, 4.60)

C (d)  
6.36  
J(8.36)

B (d)  
3.82  
J(12.64)

A (s)  
3.97

1.00

1.00

2.00

1.00

2.01

1.00

2.03

10.5 10.0 9.5 9.0 8.5 8.0 7.5 7.0 6.5 6.0 5.5 5.0 4.5 4.0 3.5 3.0 2.5 2.0 1.5 1.0 0.5 0.0 -0.5 -1.0  
f1 (ppm)

1000000  
900000  
800000  
700000  
600000  
500000  
400000  
300000  
200000  
100000  
0

$^{19}\text{F}$  NMR (376 MHz, Chloroform-*d*)  $\delta$  -80.3 (d,  $J = 2.8$  Hz), -124.6 (q,  $J = 2.9$  Hz).

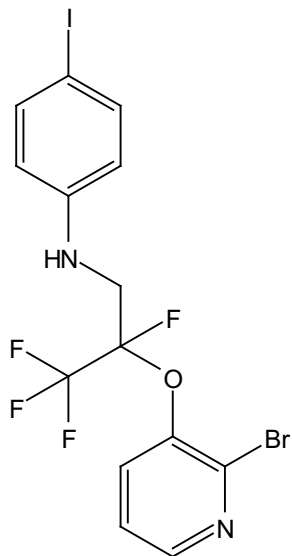

**(40)**

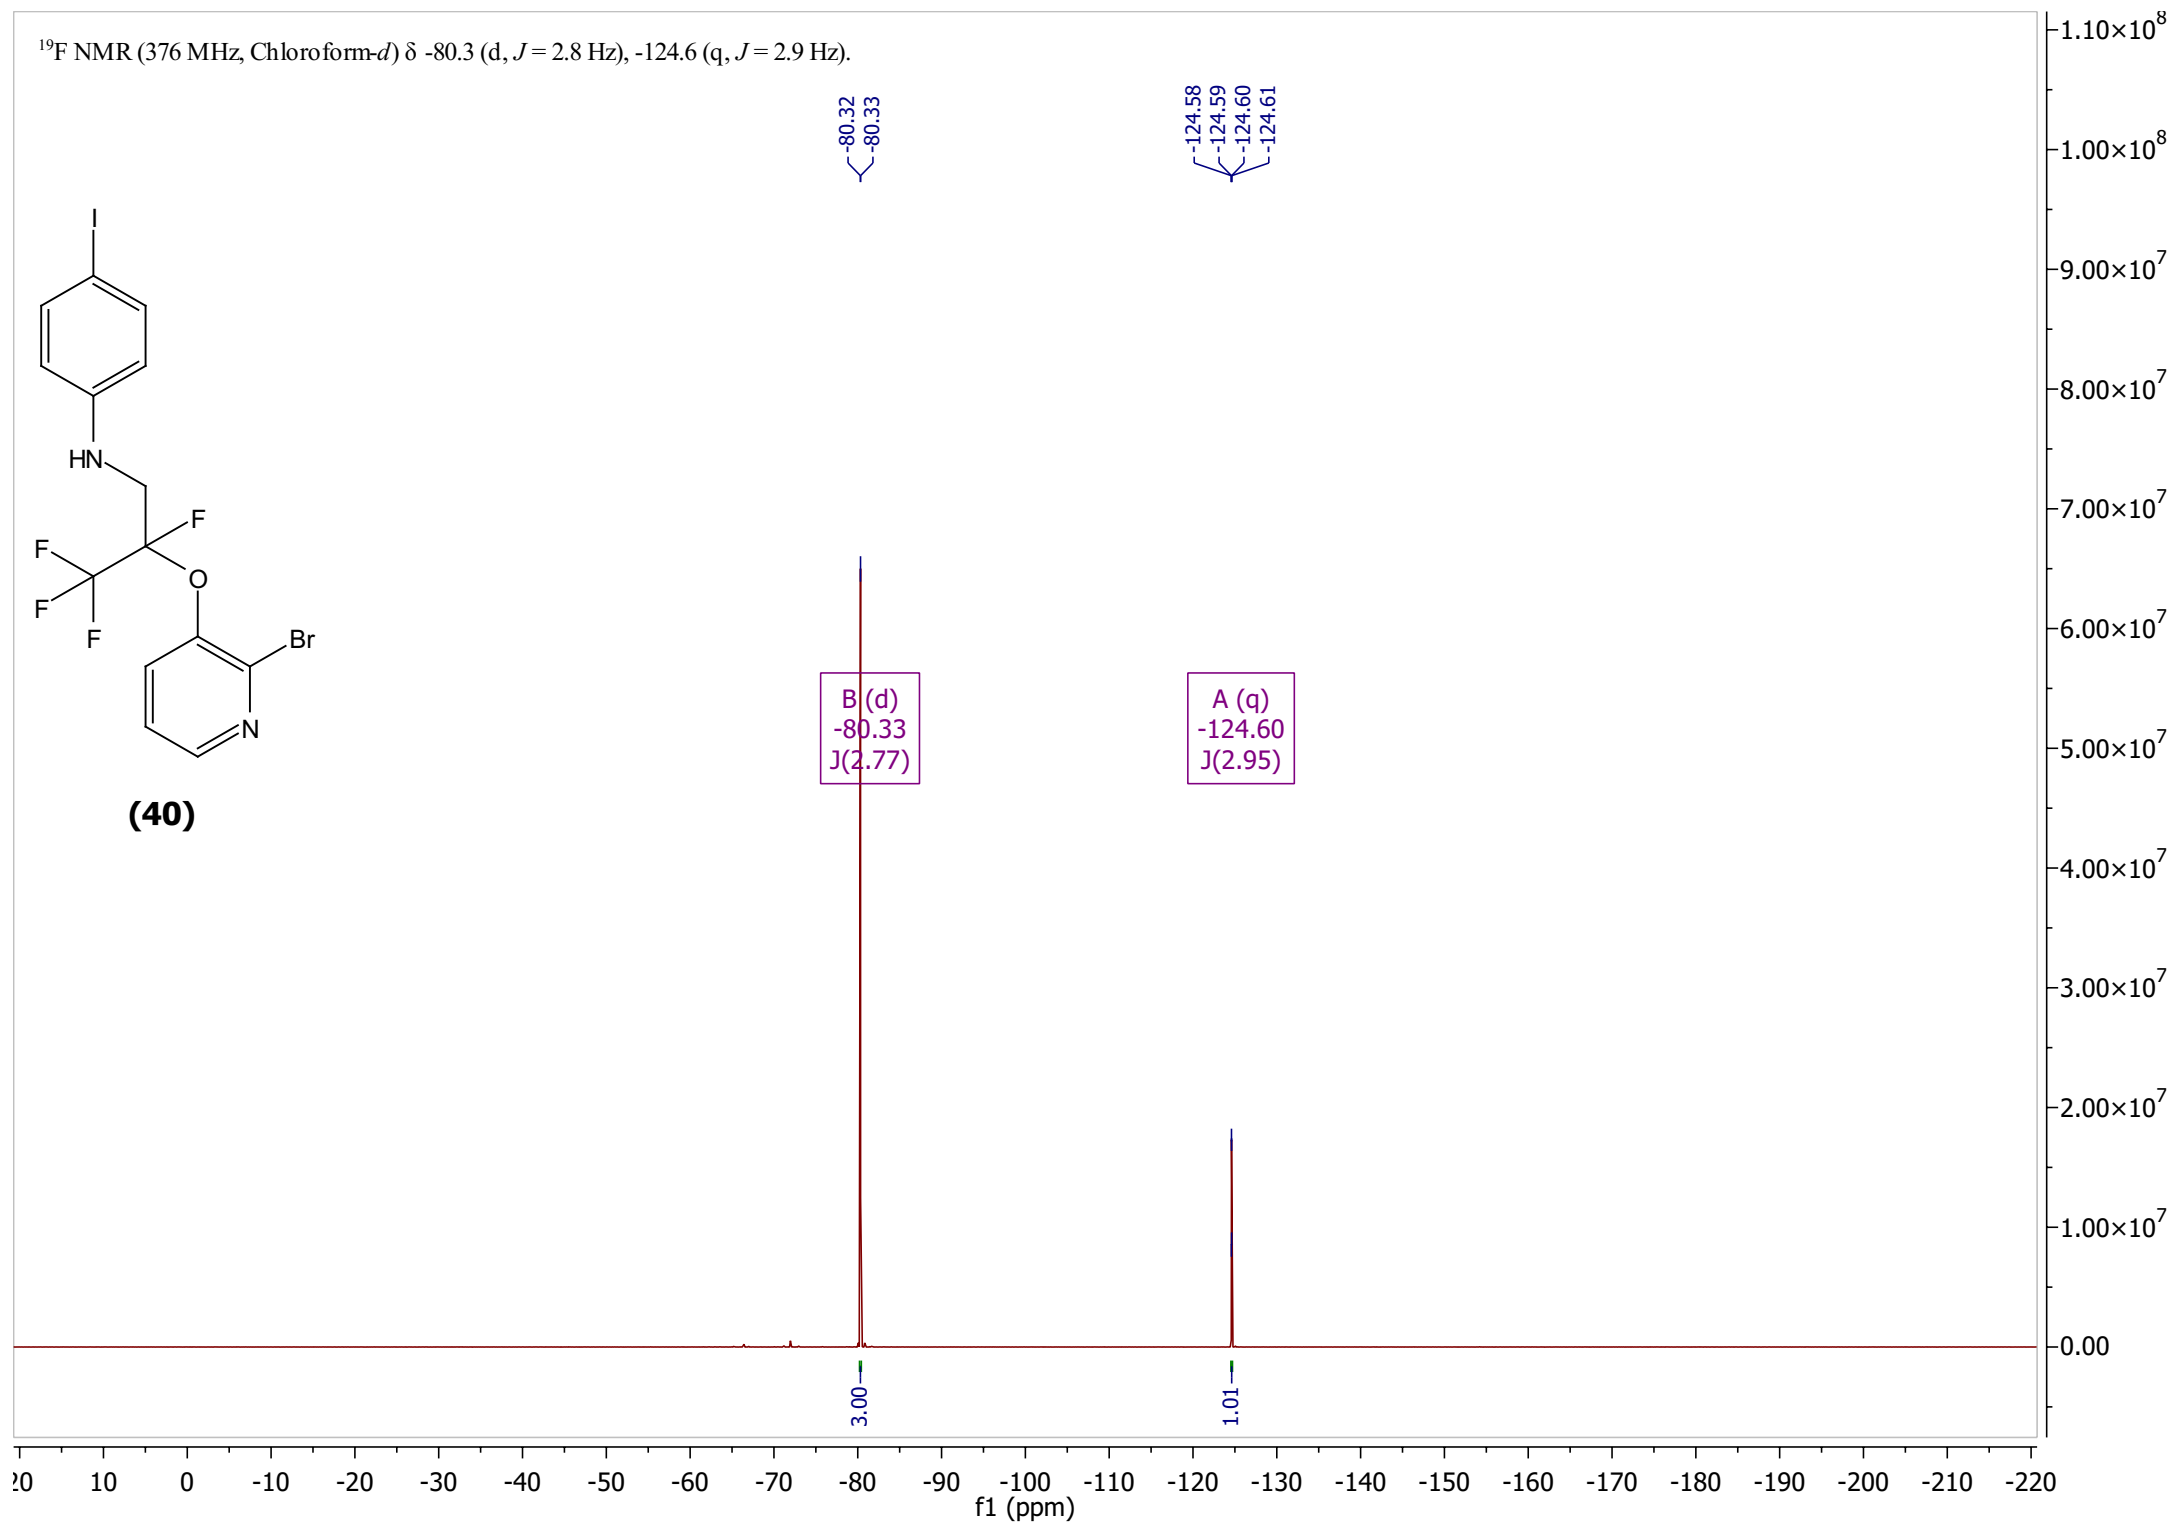

$^{13}\text{C}$  NMR (101 MHz, Chloroform-*d*)  $\delta$  146.8, 146.5, 145.9, 137.9, 136.2 (d,  $J = 2.4$  Hz), 130.6 (d,  $J = 3.3$  Hz), 123.6, 120.2 (qd,  $J = 287.6, 36.5$  Hz), 115.3, 109.3 (dq,  $J = 244.0, 34.1$  Hz), 79.9, 44.6 (d,  $J = 27.2$  Hz).



**(40)**

146.78  
146.52  
145.91  
137.95  
136.22  
136.19  
130.62  
130.59  
124.68  
124.32  
123.60  
121.82  
121.46  
118.96  
118.59  
116.10  
115.73  
115.27  
111.02  
110.69  
110.35  
110.01  
108.60  
108.26  
107.93  
107.59  
79.86  
77.48 CDCl3  
77.16 CDCl3  
76.84 CDCl3

I (s)  
137.95  
L (s)  
145.91  
K (s)  
146.52  
J (s)  
146.78  
G (d)  
130.60  
J(3.35)  
D (dq)  
109.31  
J(244.02, 34.09)  
C (qd)  
120.21  
J(287.58, 36.53)  
A (s)  
79.86  
H (d)  
136.20  
J(2.37)  
E (s)  
115.27  
F (s)  
123.60  
B (d)  
44.62  
J(27.24)

44.76  
44.49

210 200 190 180 170 160 150 140 130 120 110 100 90 80 70 60 50 40 30 20 10 0 -10  
f1 (ppm)

400000  
380000  
360000  
340000  
320000  
300000  
280000  
260000  
240000  
220000  
200000  
180000  
160000  
140000  
120000  
100000  
80000  
60000  
40000  
20000  
0

$^1\text{H}$  NMR (400 MHz, Chloroform- $d$ )  $\delta$  7.41 – 7.33 (m, 1H), 7.32 – 7.26 (m, 2H), 6.88 (dd,  $J = 8.1, 2.7$  Hz, 1H), 5.00 (hept,  $J = 5.1$  Hz, 1H), 4.09 (s, 1H), 3.98 – 3.68 (m, 2H), 2.57 (s, 3H).

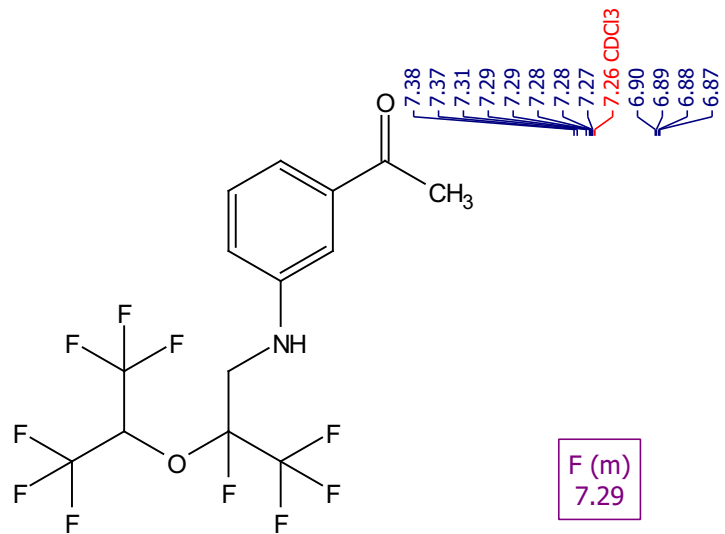

(41)

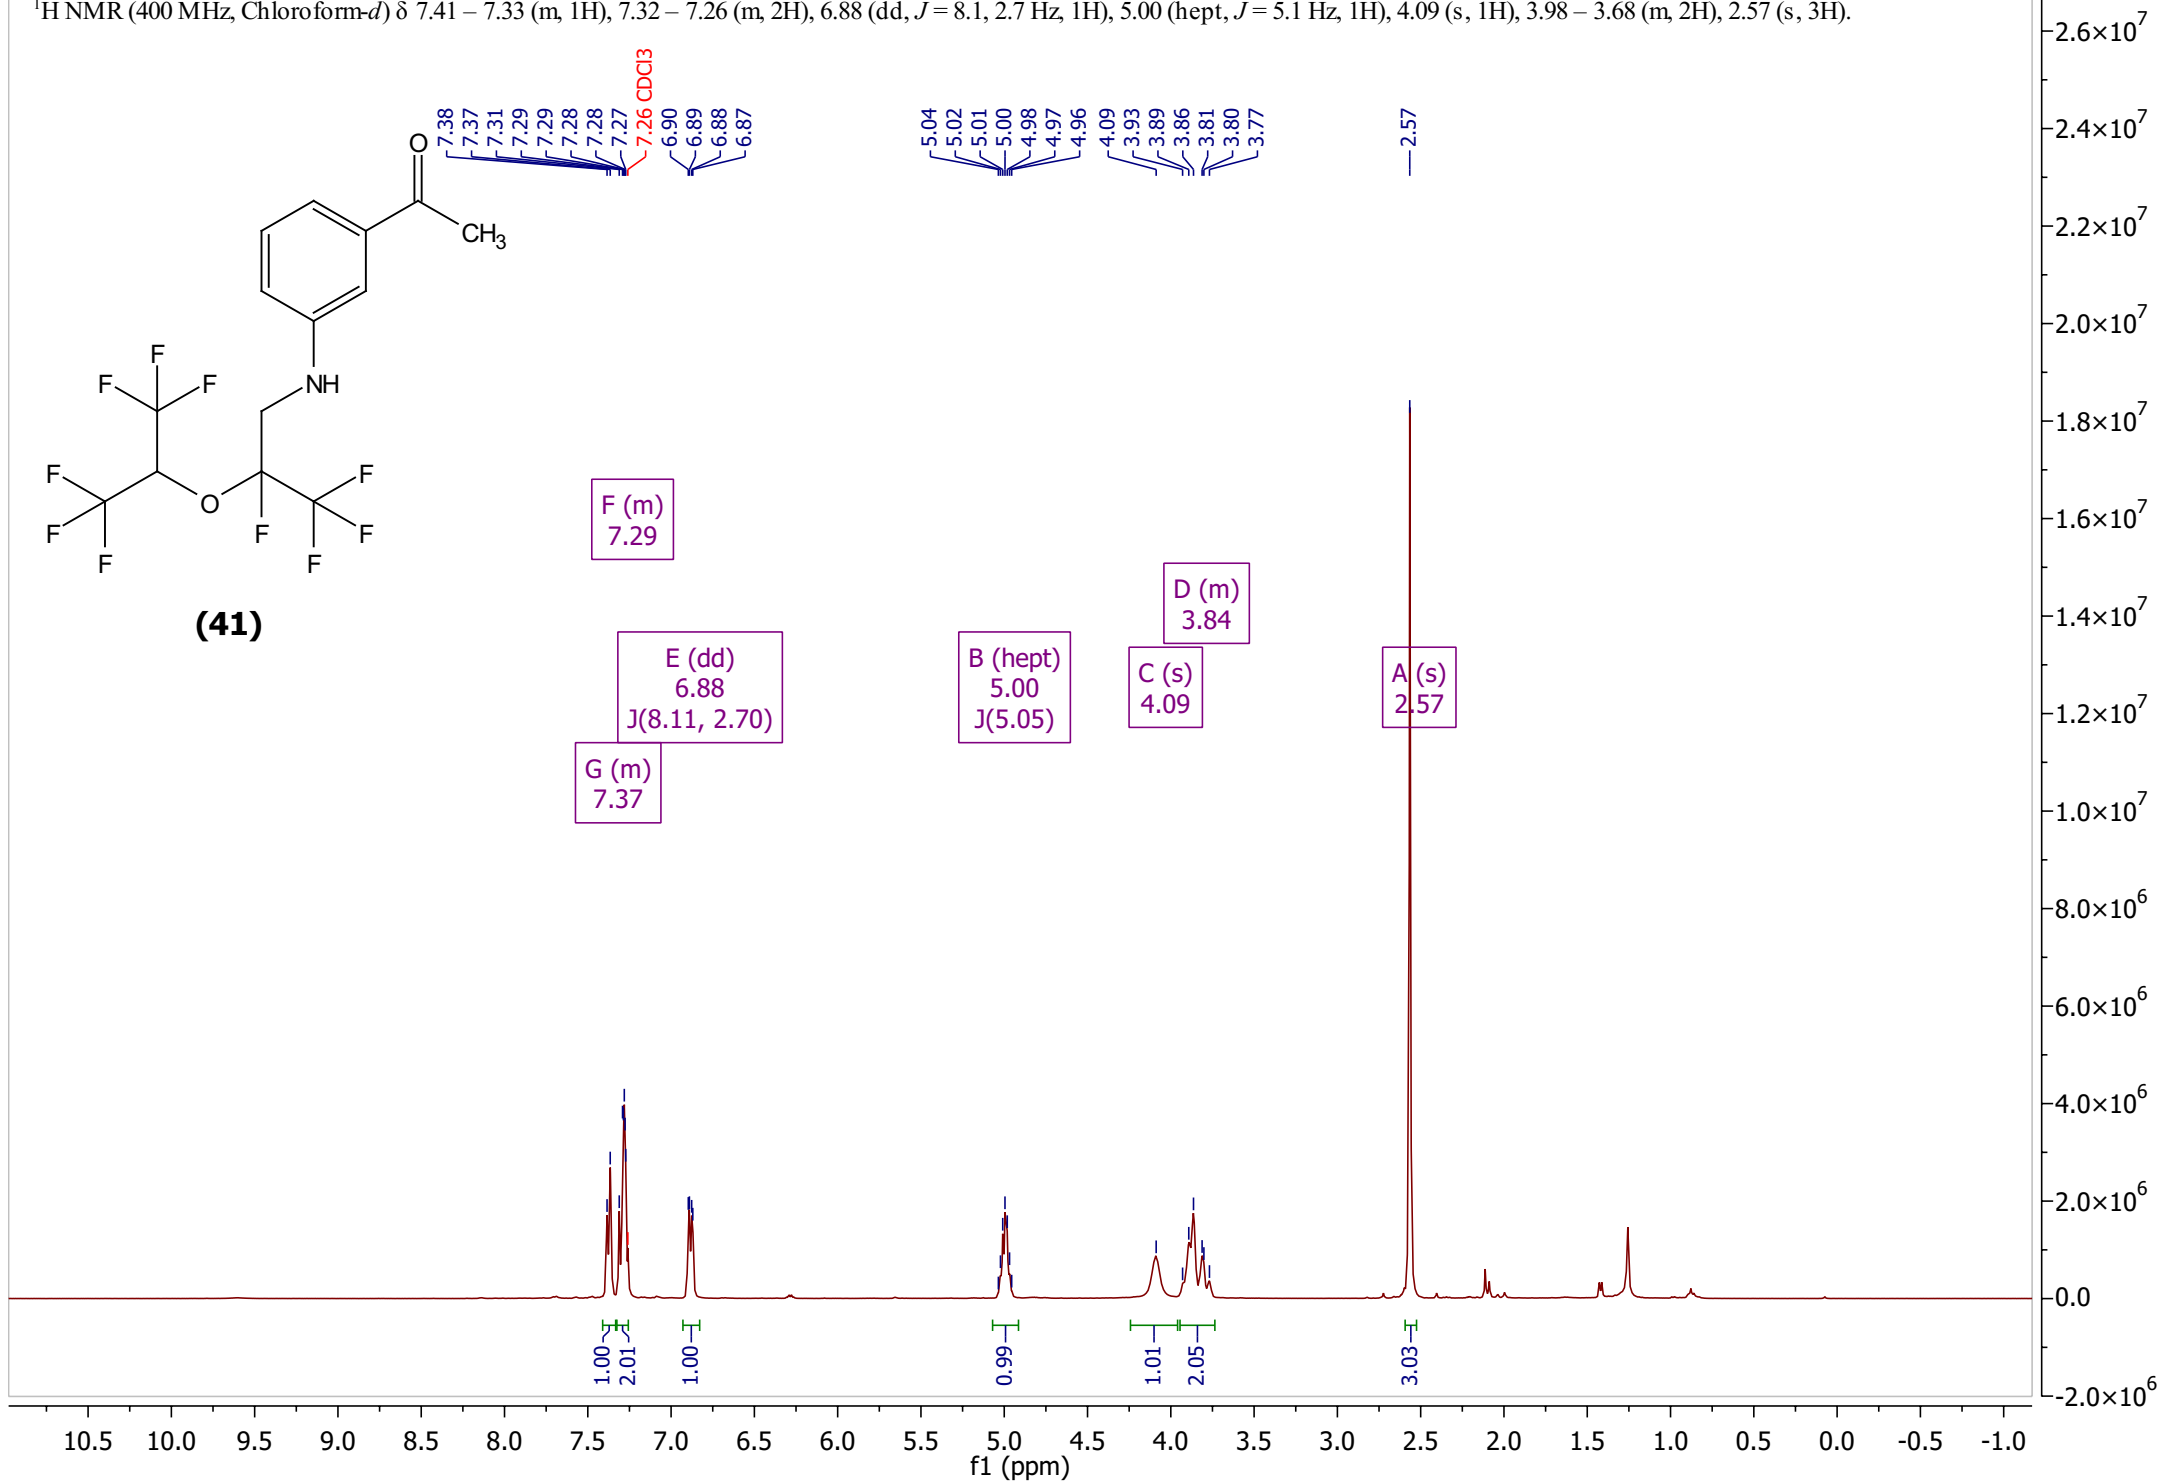

$^{19}\text{F}$  NMR (376 MHz, Chloroform-*d*)  $\delta$  -73.3 (qq,  $J$  = 9.1, 4.6 Hz), -73.6 (p,  $J$  = 9.8 Hz), -81.6 (dp,  $J$  = 6.8, 2.7 Hz), -136.8 (q,  $J$  = 10.2 Hz).

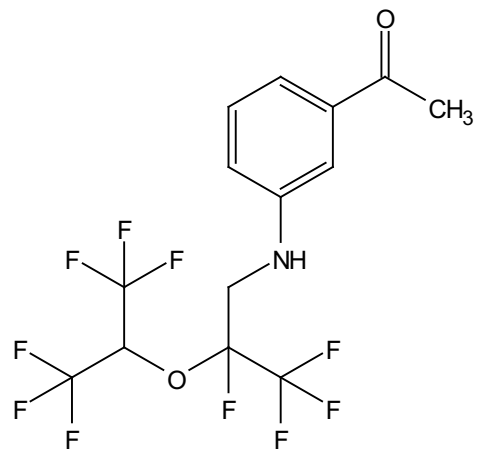

(41)

73.23  
73.24  
73.26  
73.27  
73.28  
73.29  
73.30  
73.32  
73.33  
73.34  
73.56  
73.59  
73.61  
73.64  
73.67  
81.59  
81.60  
81.60  
81.61  
81.61  
81.61  
81.62  
81.62  
81.63  
136.71  
136.74  
136.77  
136.79

C (p)  
-73.61  
J(9.83)

B (dp)  
-81.61  
J(6.76, 2.66)

D (qq)  
-73.29  
J(9.06, 4.64)

A (q)  
-136.75  
J(10.22)

3.03  
3.06

3.00

1.00

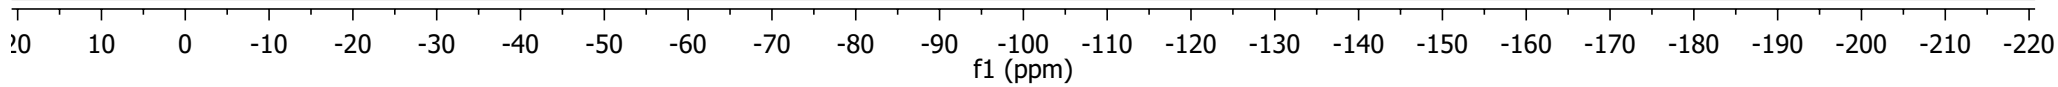

$^{13}\text{C}$  NMR (101 MHz, Chloroform-*d*)  $\delta$  198.4, 146.8, 138.3, 129.7, 120.4 (q,  $J = 282.1$  Hz), 120.2 (qd,  $J = 288.1, 38.1$  Hz), 119.7, 118.1, 112.3, 108.0 (dq,  $J = 246.6, 33.9$  Hz), 70.6 (pd,  $J = 34.5, 6.3$  Hz), 45.3 (d,  $J = 21.6$  Hz), 26.7.

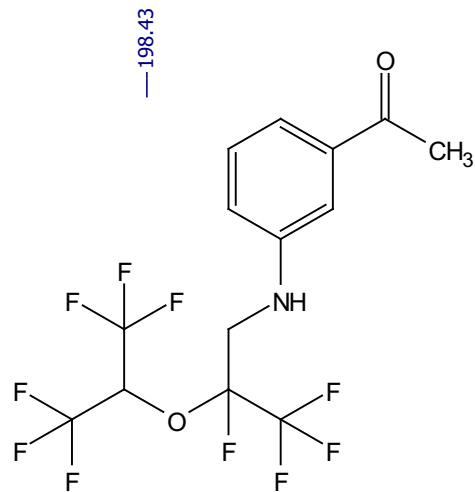

**(41)**

D (s)  
198.43

E (s)  
146.82

F (s)  
138.35

G (s)  
129.66

J (qd)  
120.19  
J(288.09, 38.13)

M (q)  
120.40  
J(282.06)

H (dq)  
107.99  
J(246.60, 33.93)

I (s)  
112.32

K (s)  
119.74

L (s)  
118.14

A (pd)  
70.63  
J(34.46, 6.33)

B (d)  
45.25  
J(21.56)

C (s)  
26.75

198.43  
146.82  
138.35  
129.66  
124.67  
124.61  
124.30  
121.81  
121.78  
121.43  
119.74  
118.99  
118.95  
118.57  
118.14  
116.19  
116.09  
115.71  
112.32  
109.72  
109.38  
109.04  
108.71  
107.26  
106.93  
106.59  
106.26  
77.48 CDCl3  
77.16 CDCl3  
76.84 CDCl3  
71.35  
71.29  
71.01  
70.94  
70.66  
70.60  
70.32  
70.26  
69.98  
69.91  
45.36  
45.14  
26.75

210 200 190 180 170 160 150 140 130 120 110 100 90 80 70 60 50 40 30 20 10 0 -10  
f1 (ppm)

$^1\text{H NMR}$  (400 MHz, Chloroform-*d*)  $\delta$  7.98 (d,  $J = 8.8$  Hz, 2H), 7.21 (d,  $J = 8.8$  Hz, 2H), 4.30 (q,  $J = 7.1$  Hz, 2H), 3.70 – 3.53 (m, 2H), 1.31 (t,  $J = 7.2$  Hz, 3H).

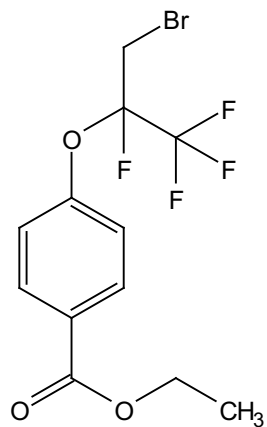

**(42)**

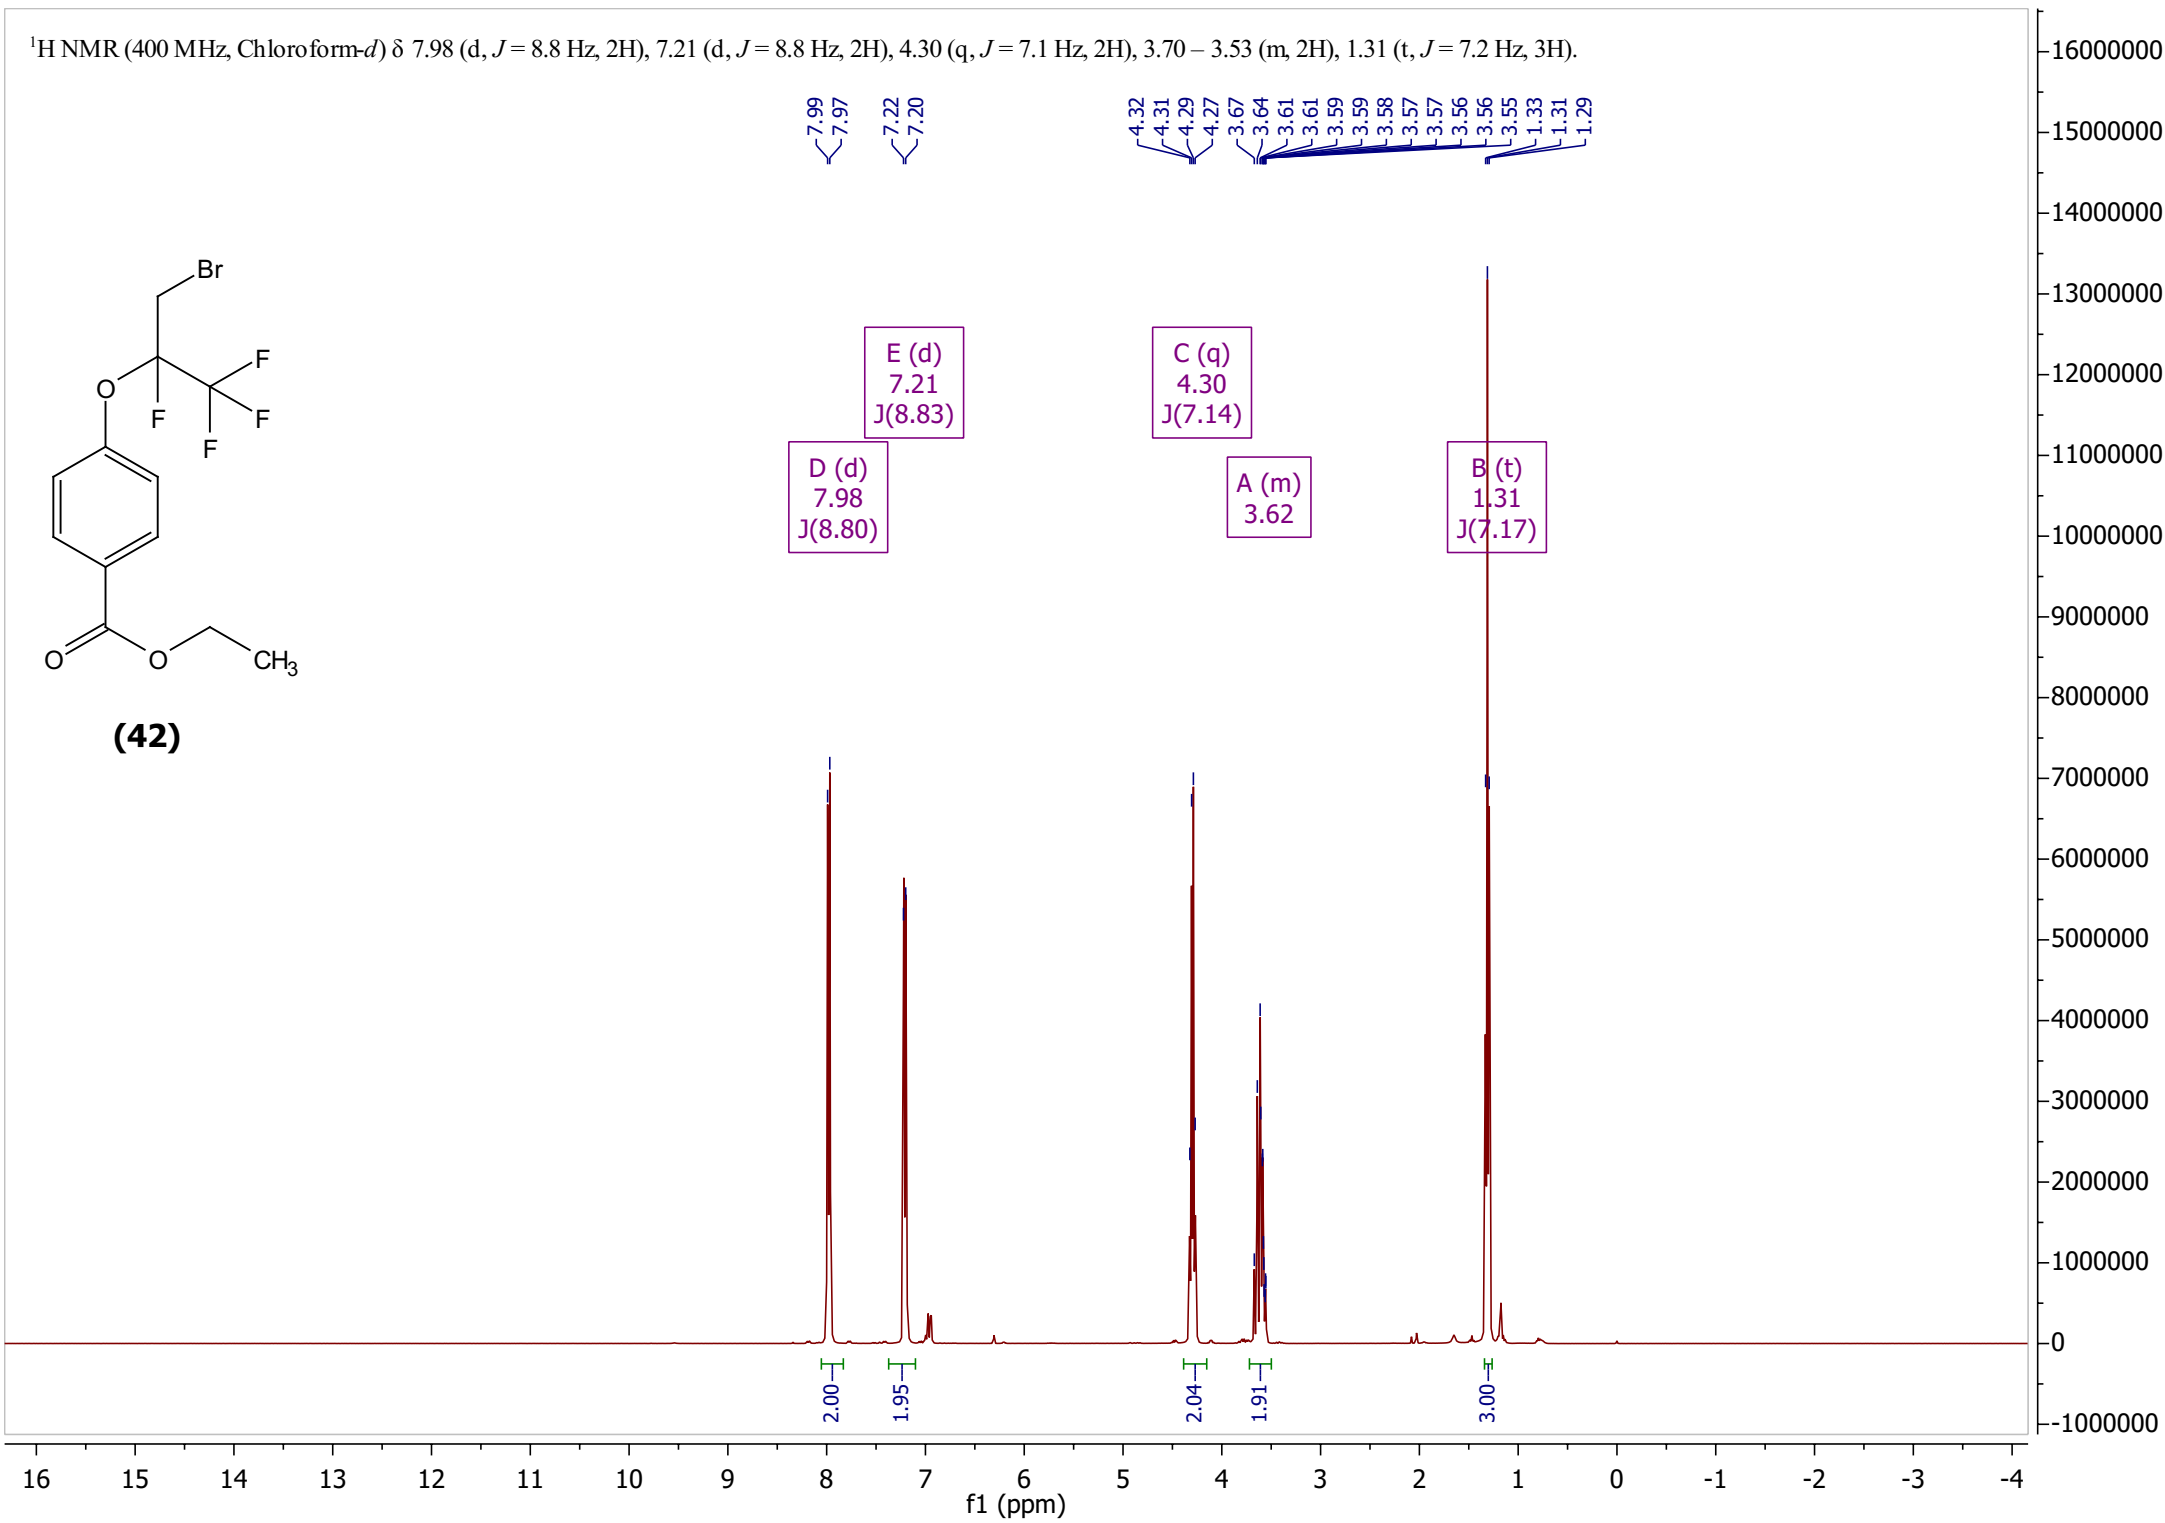



$^{19}\text{F}$  NMR (376 MHz, Chloroform-*d*)  $\delta$  -79.7 (d,  $J = 2.4$  Hz), -116.4 (q,  $J = 2.2$  Hz).

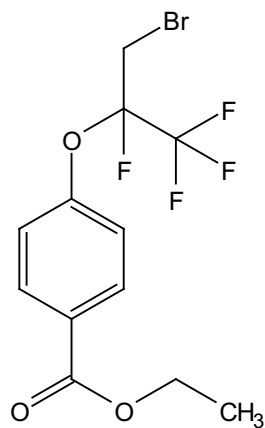

**(42)**

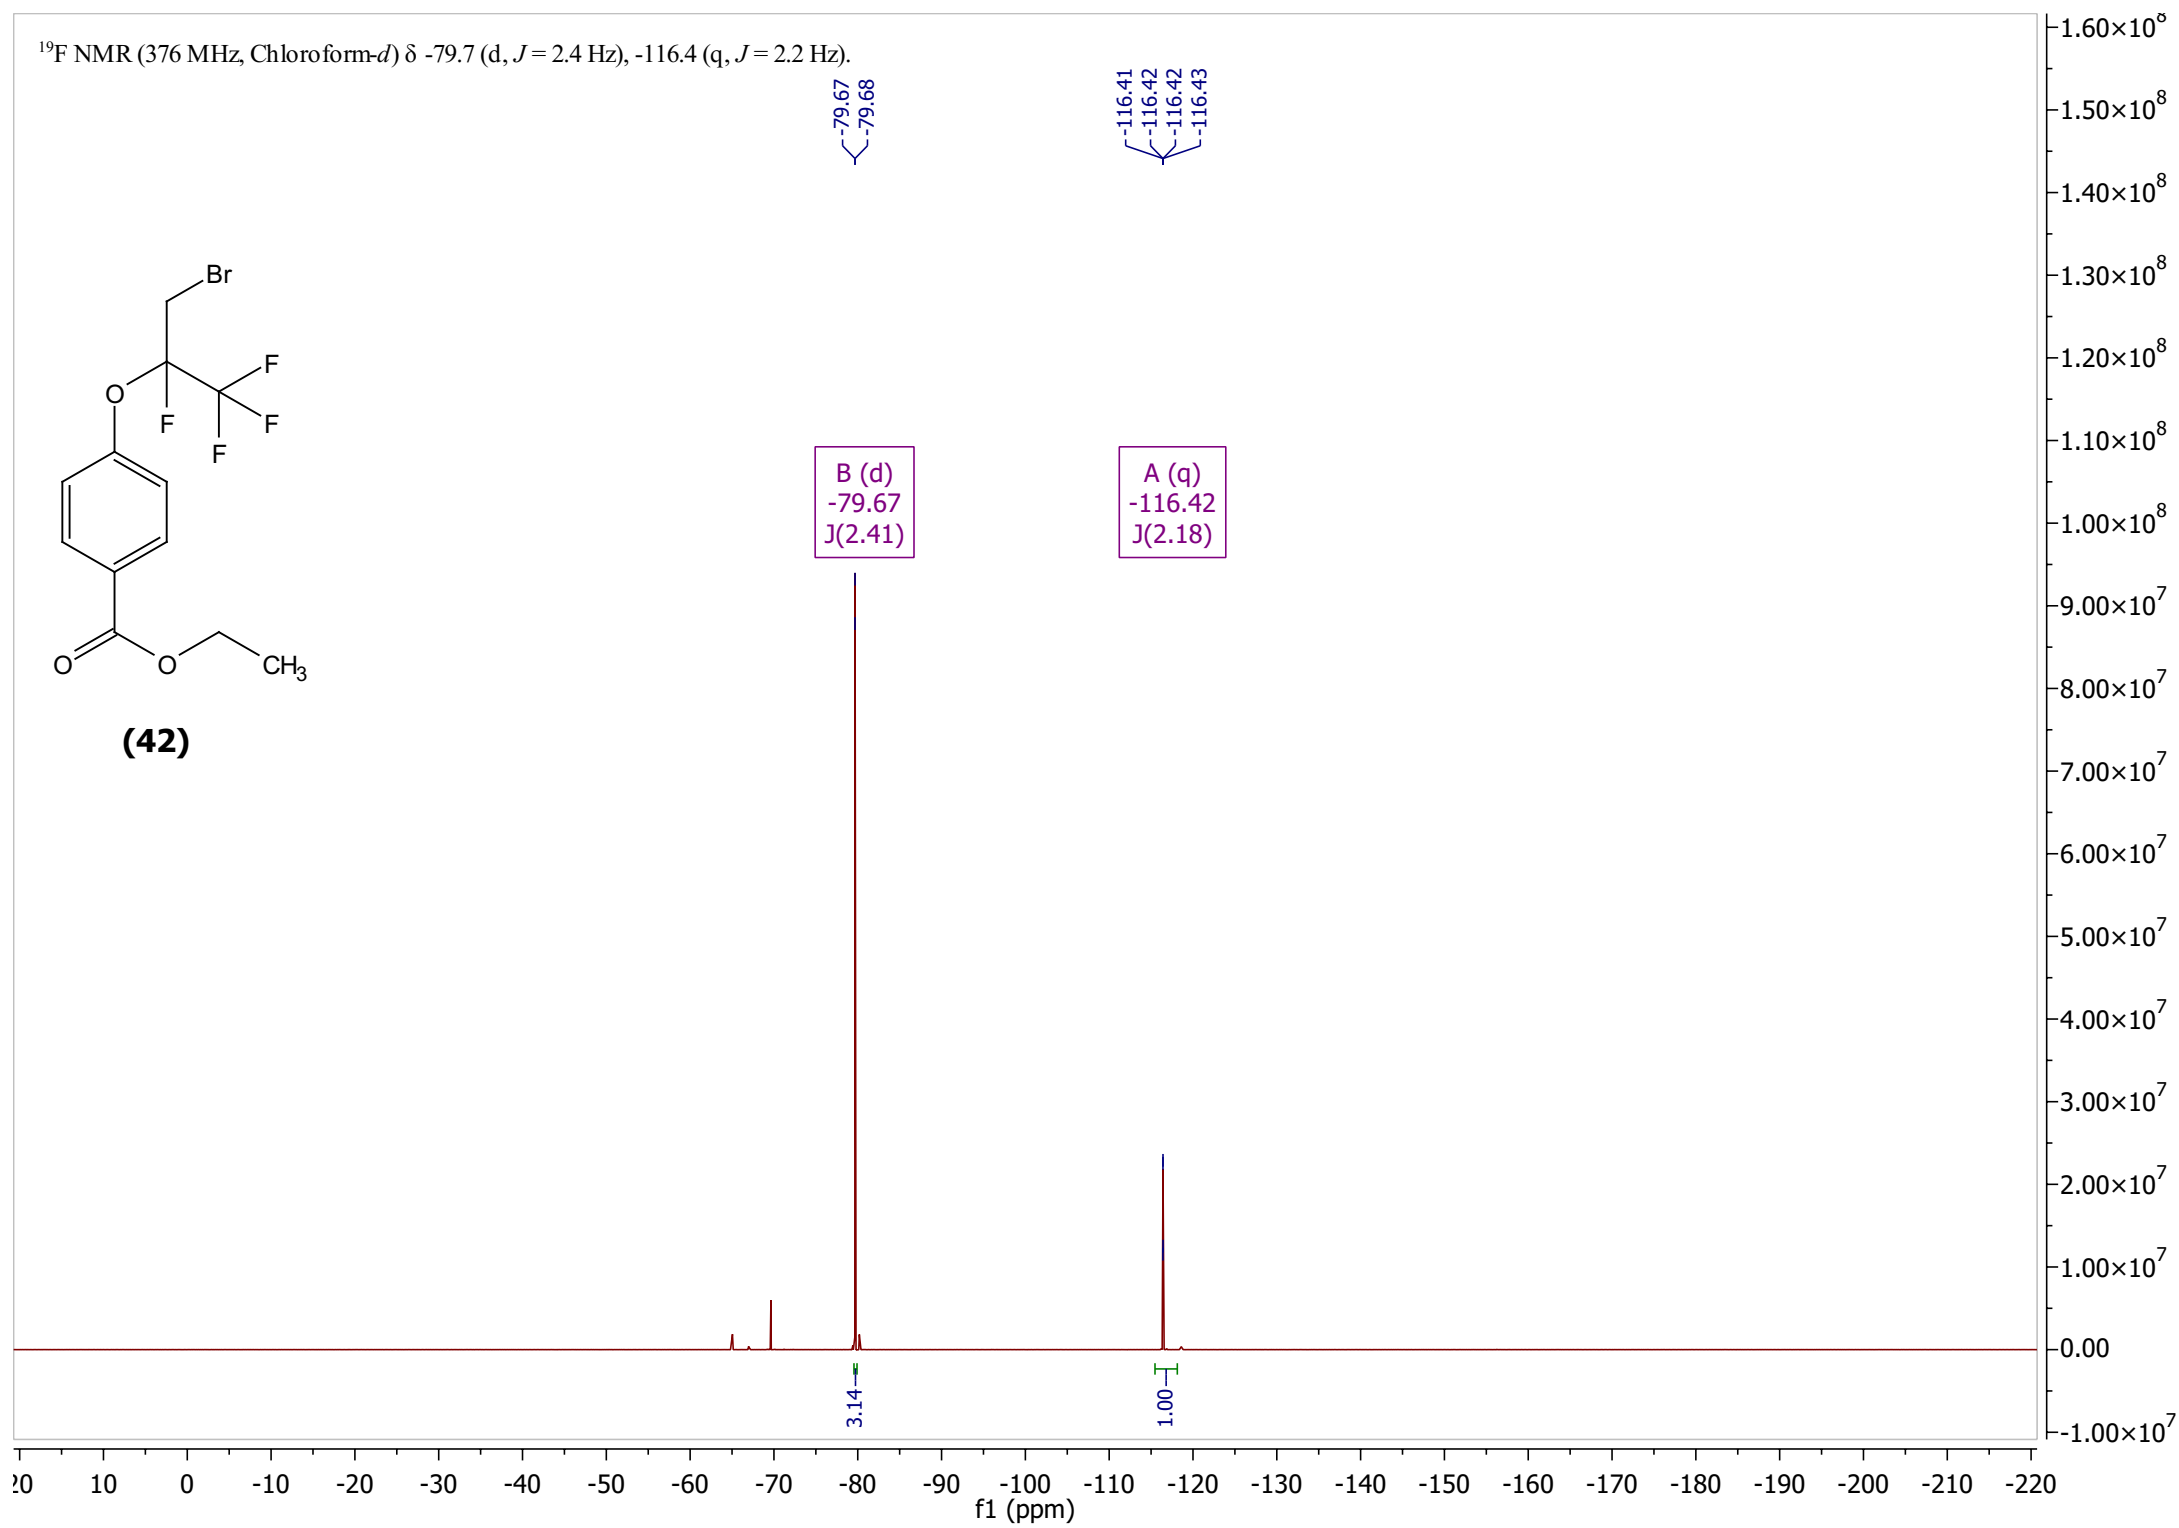

$^{13}\text{C}$  NMR (101 MHz, Chloroform-*d*)  $\delta$  165.7, 154.6, 131.4, 128.6, 122.1 (d,  $J = 2.5$  Hz), 119.9 (qd,  $J = 288.1, 36.9$  Hz), 107.2 (dq,  $J = 239.7, 34.3$  Hz), 61.3, 25.3 (d,  $J = 34.6$  Hz), 14.4.

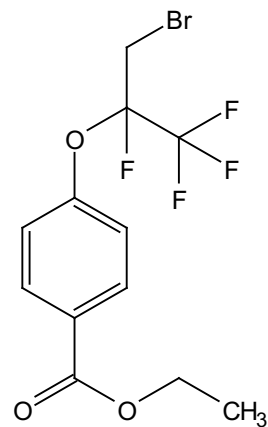

(42)

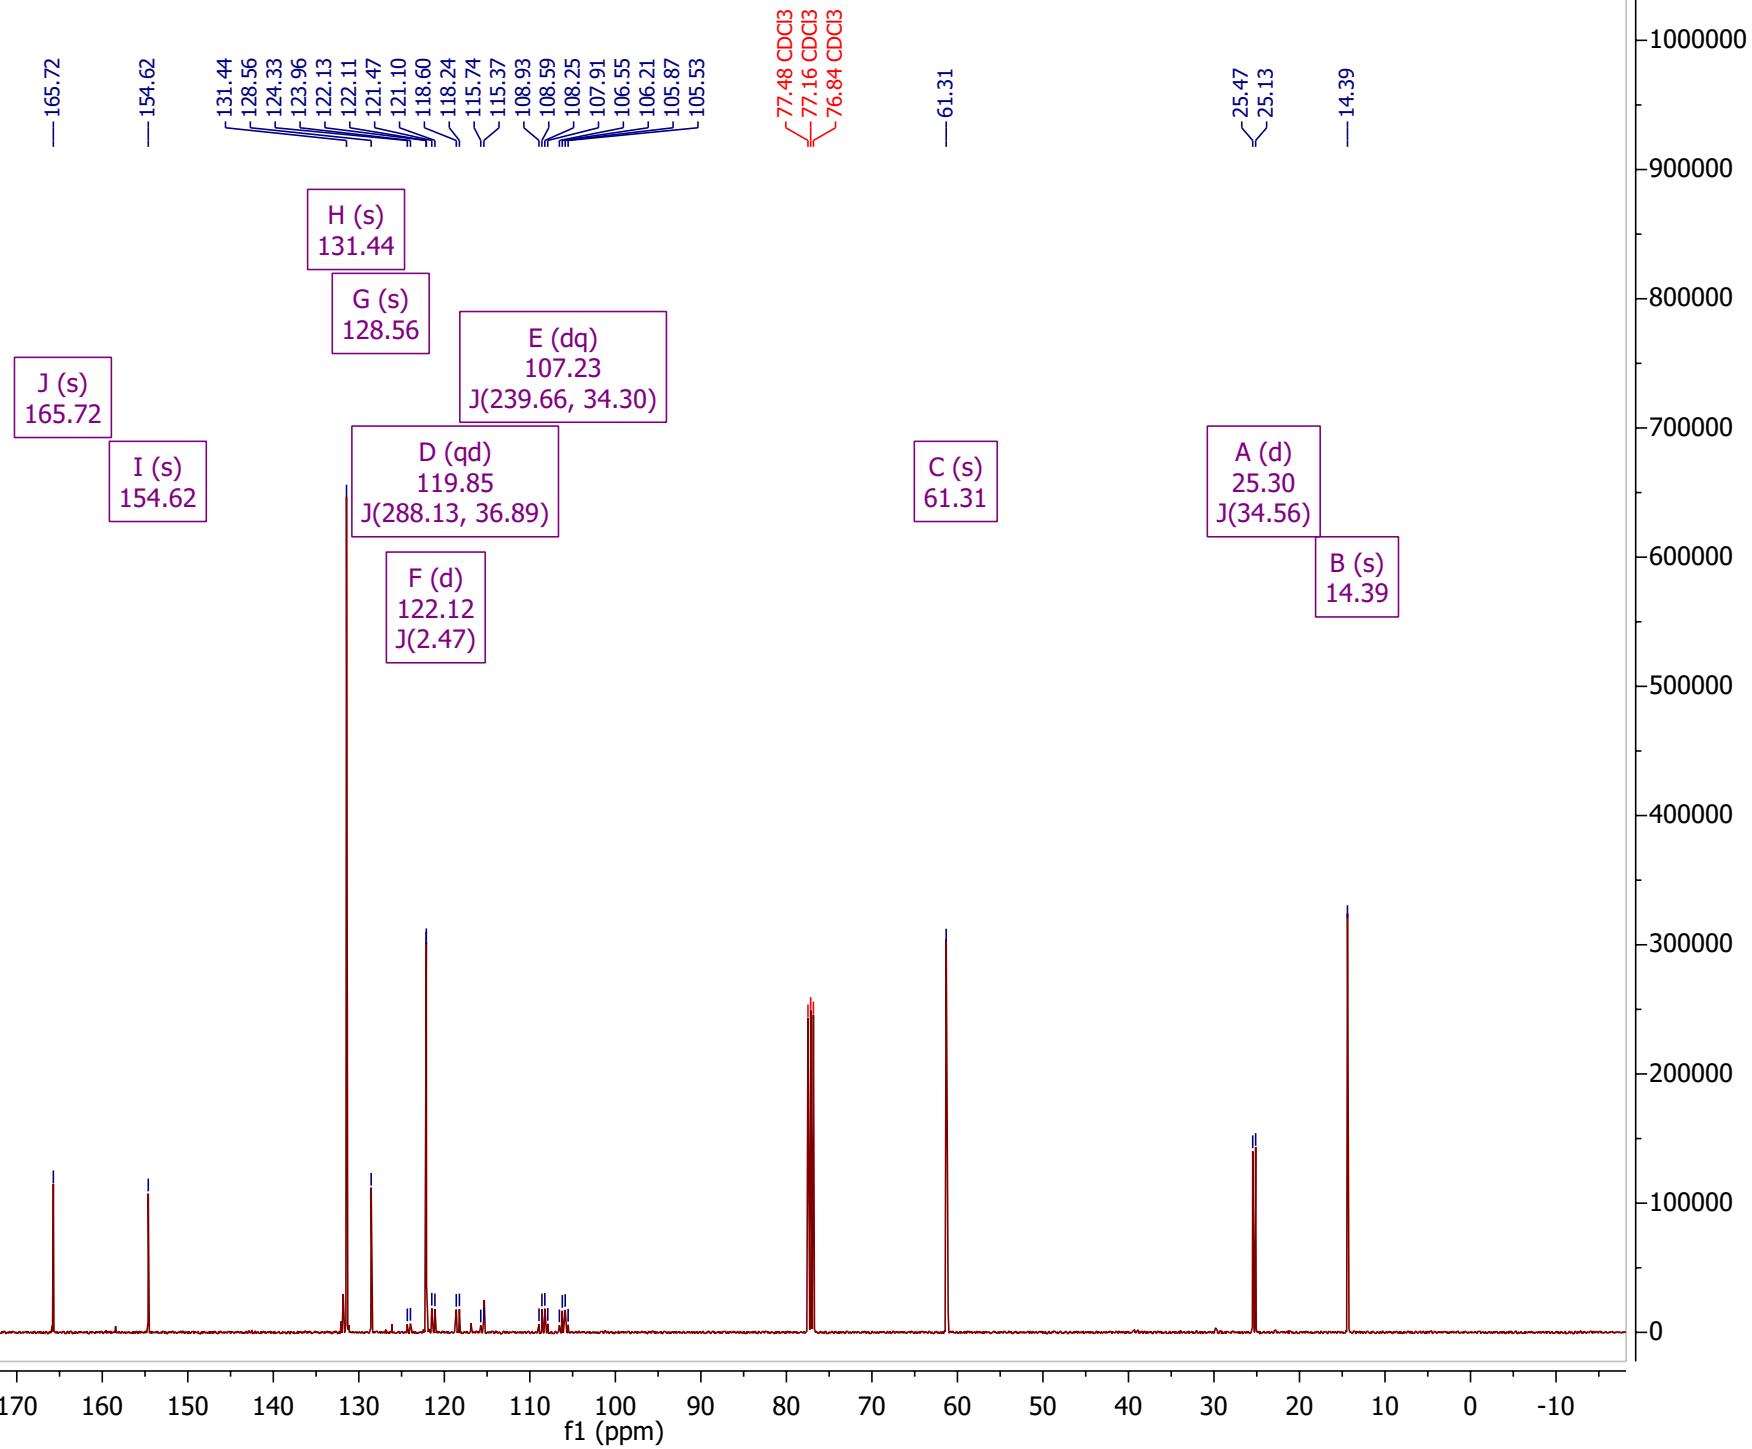

<sup>1</sup>H NMR (400 MHz, Chloroform-*d*) δ 8.00 (d, *J* = 8.8 Hz, 2H), 7.18 (d, *J* = 8.7 Hz, 2H), 4.31 (q, *J* = 7.1 Hz, 2H), 3.60 – 3.43 (m, 2H), 1.32 (t, *J* = 7.1 Hz, 3H).

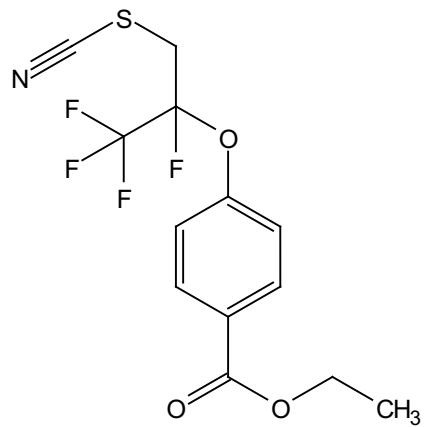

**(43)**

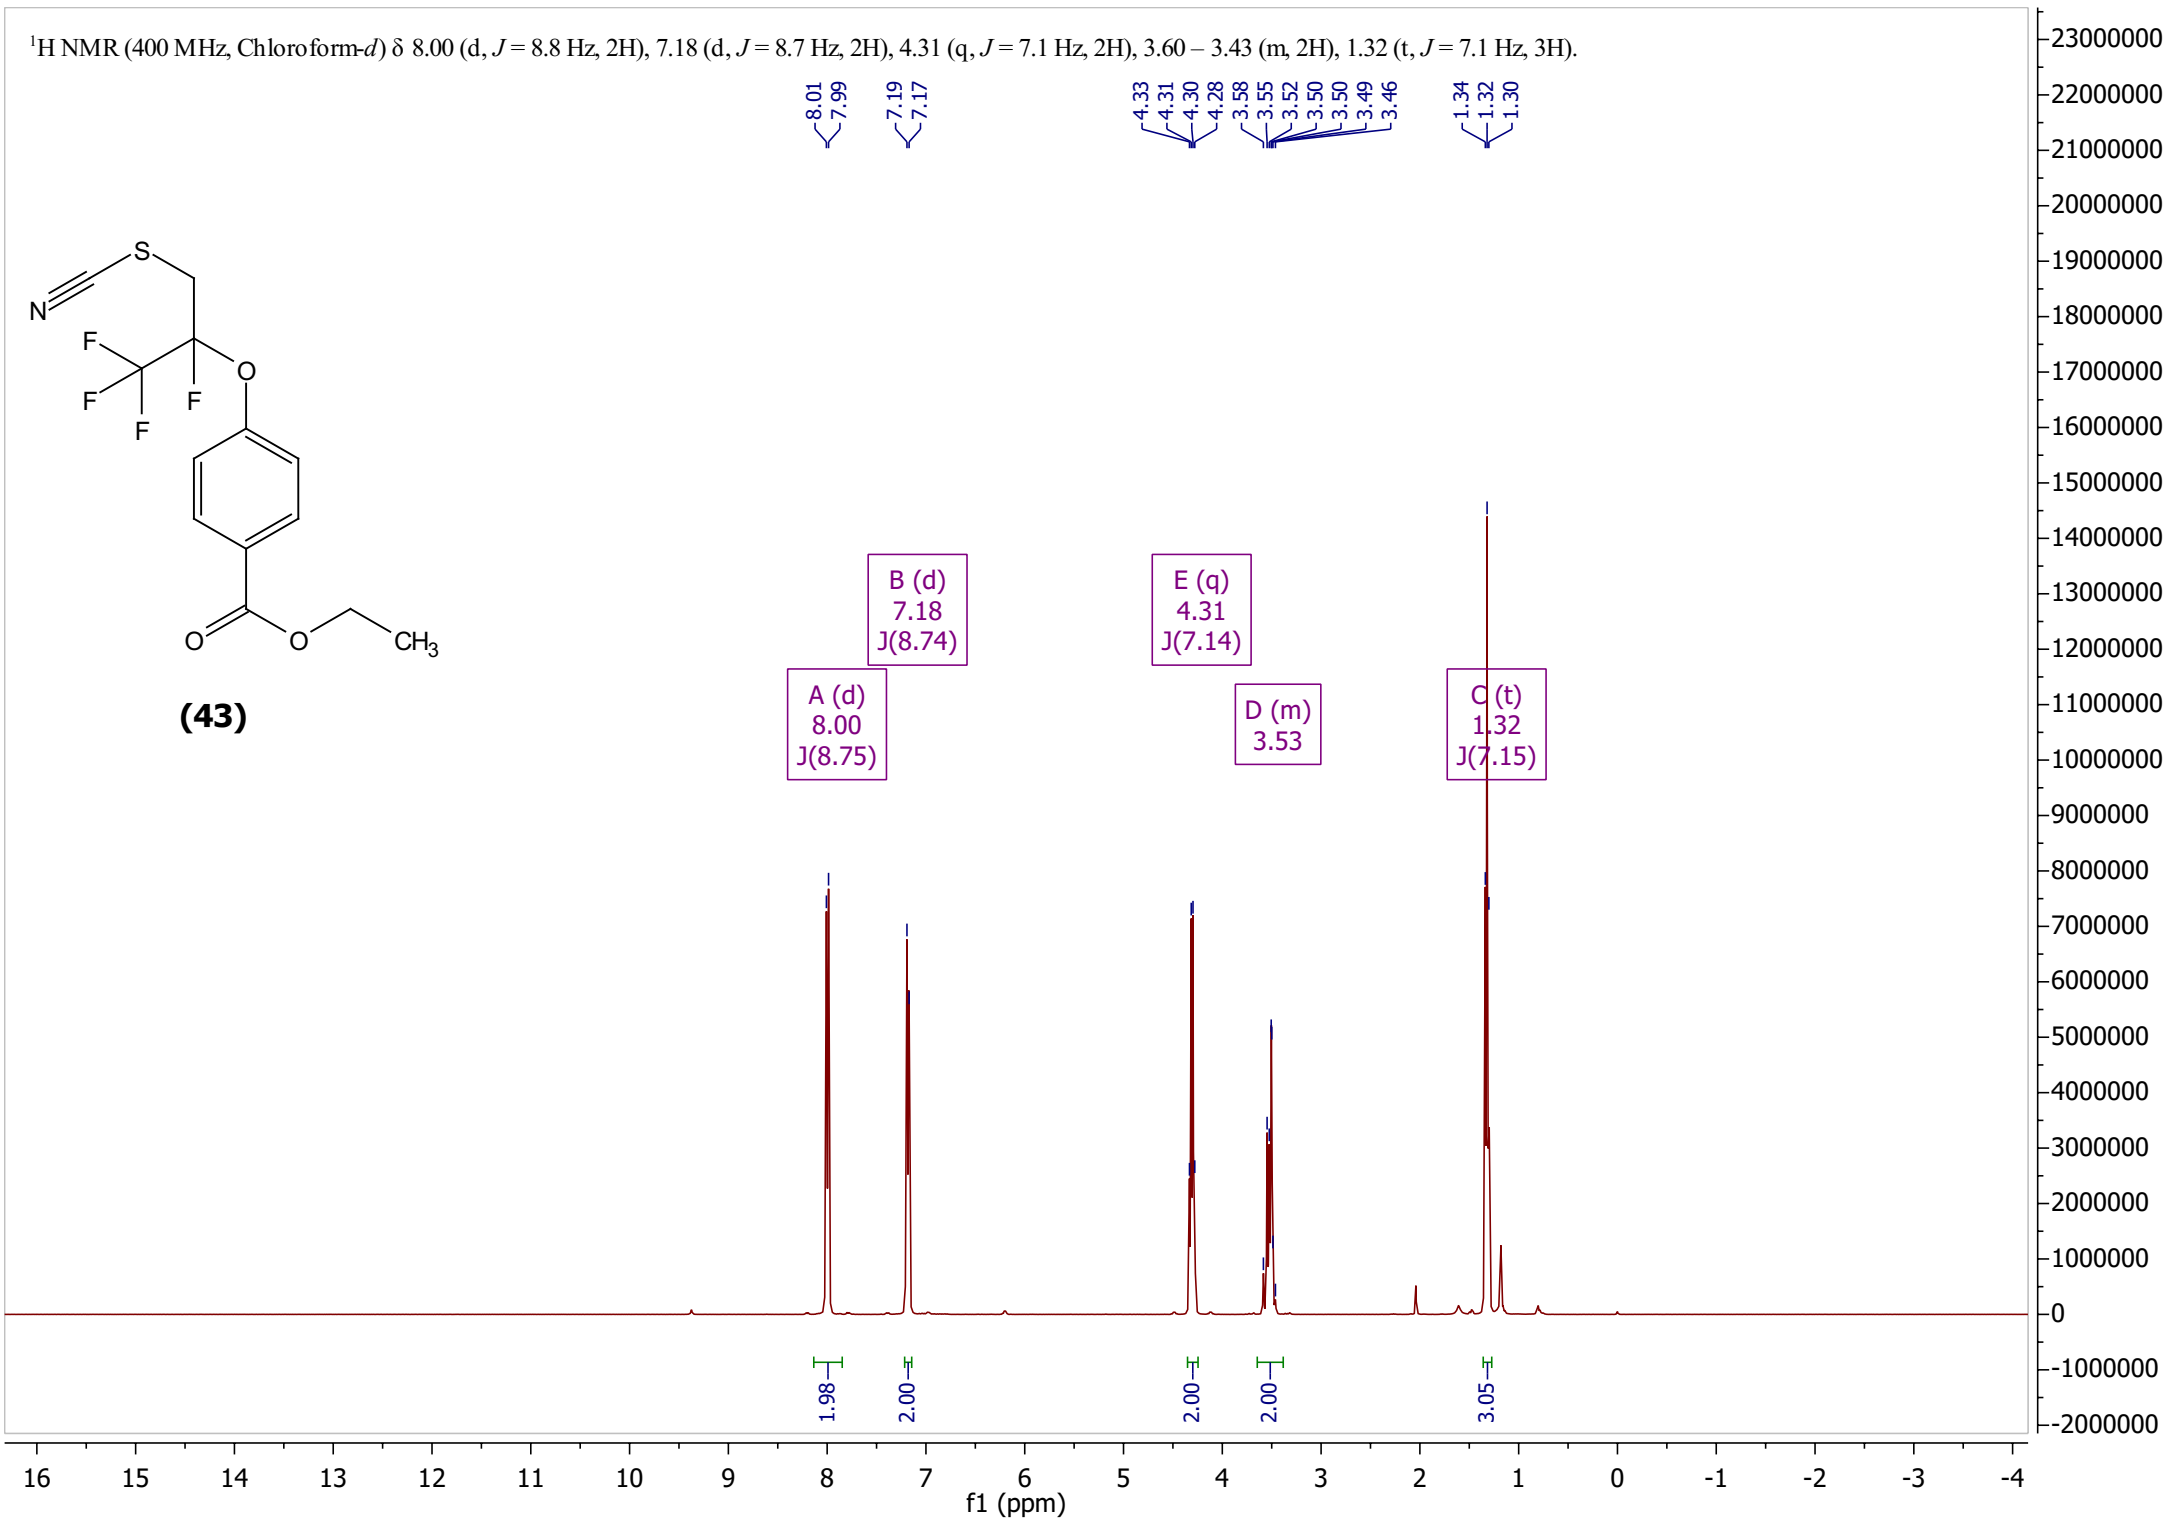

$^{19}\text{F}$  NMR (376 MHz, Chloroform- $d$ )  $\delta$  -79.1 (d,  $J = 2.8$  Hz), -122.0 (q,  $J = 3.0$  Hz).

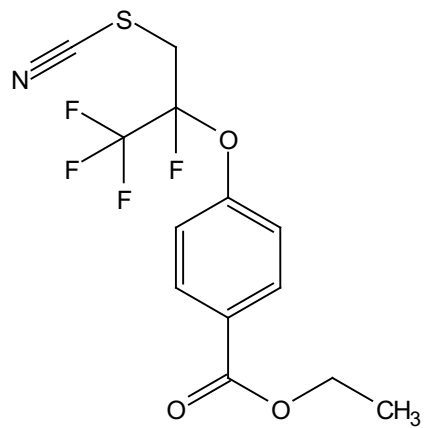

**(43)**

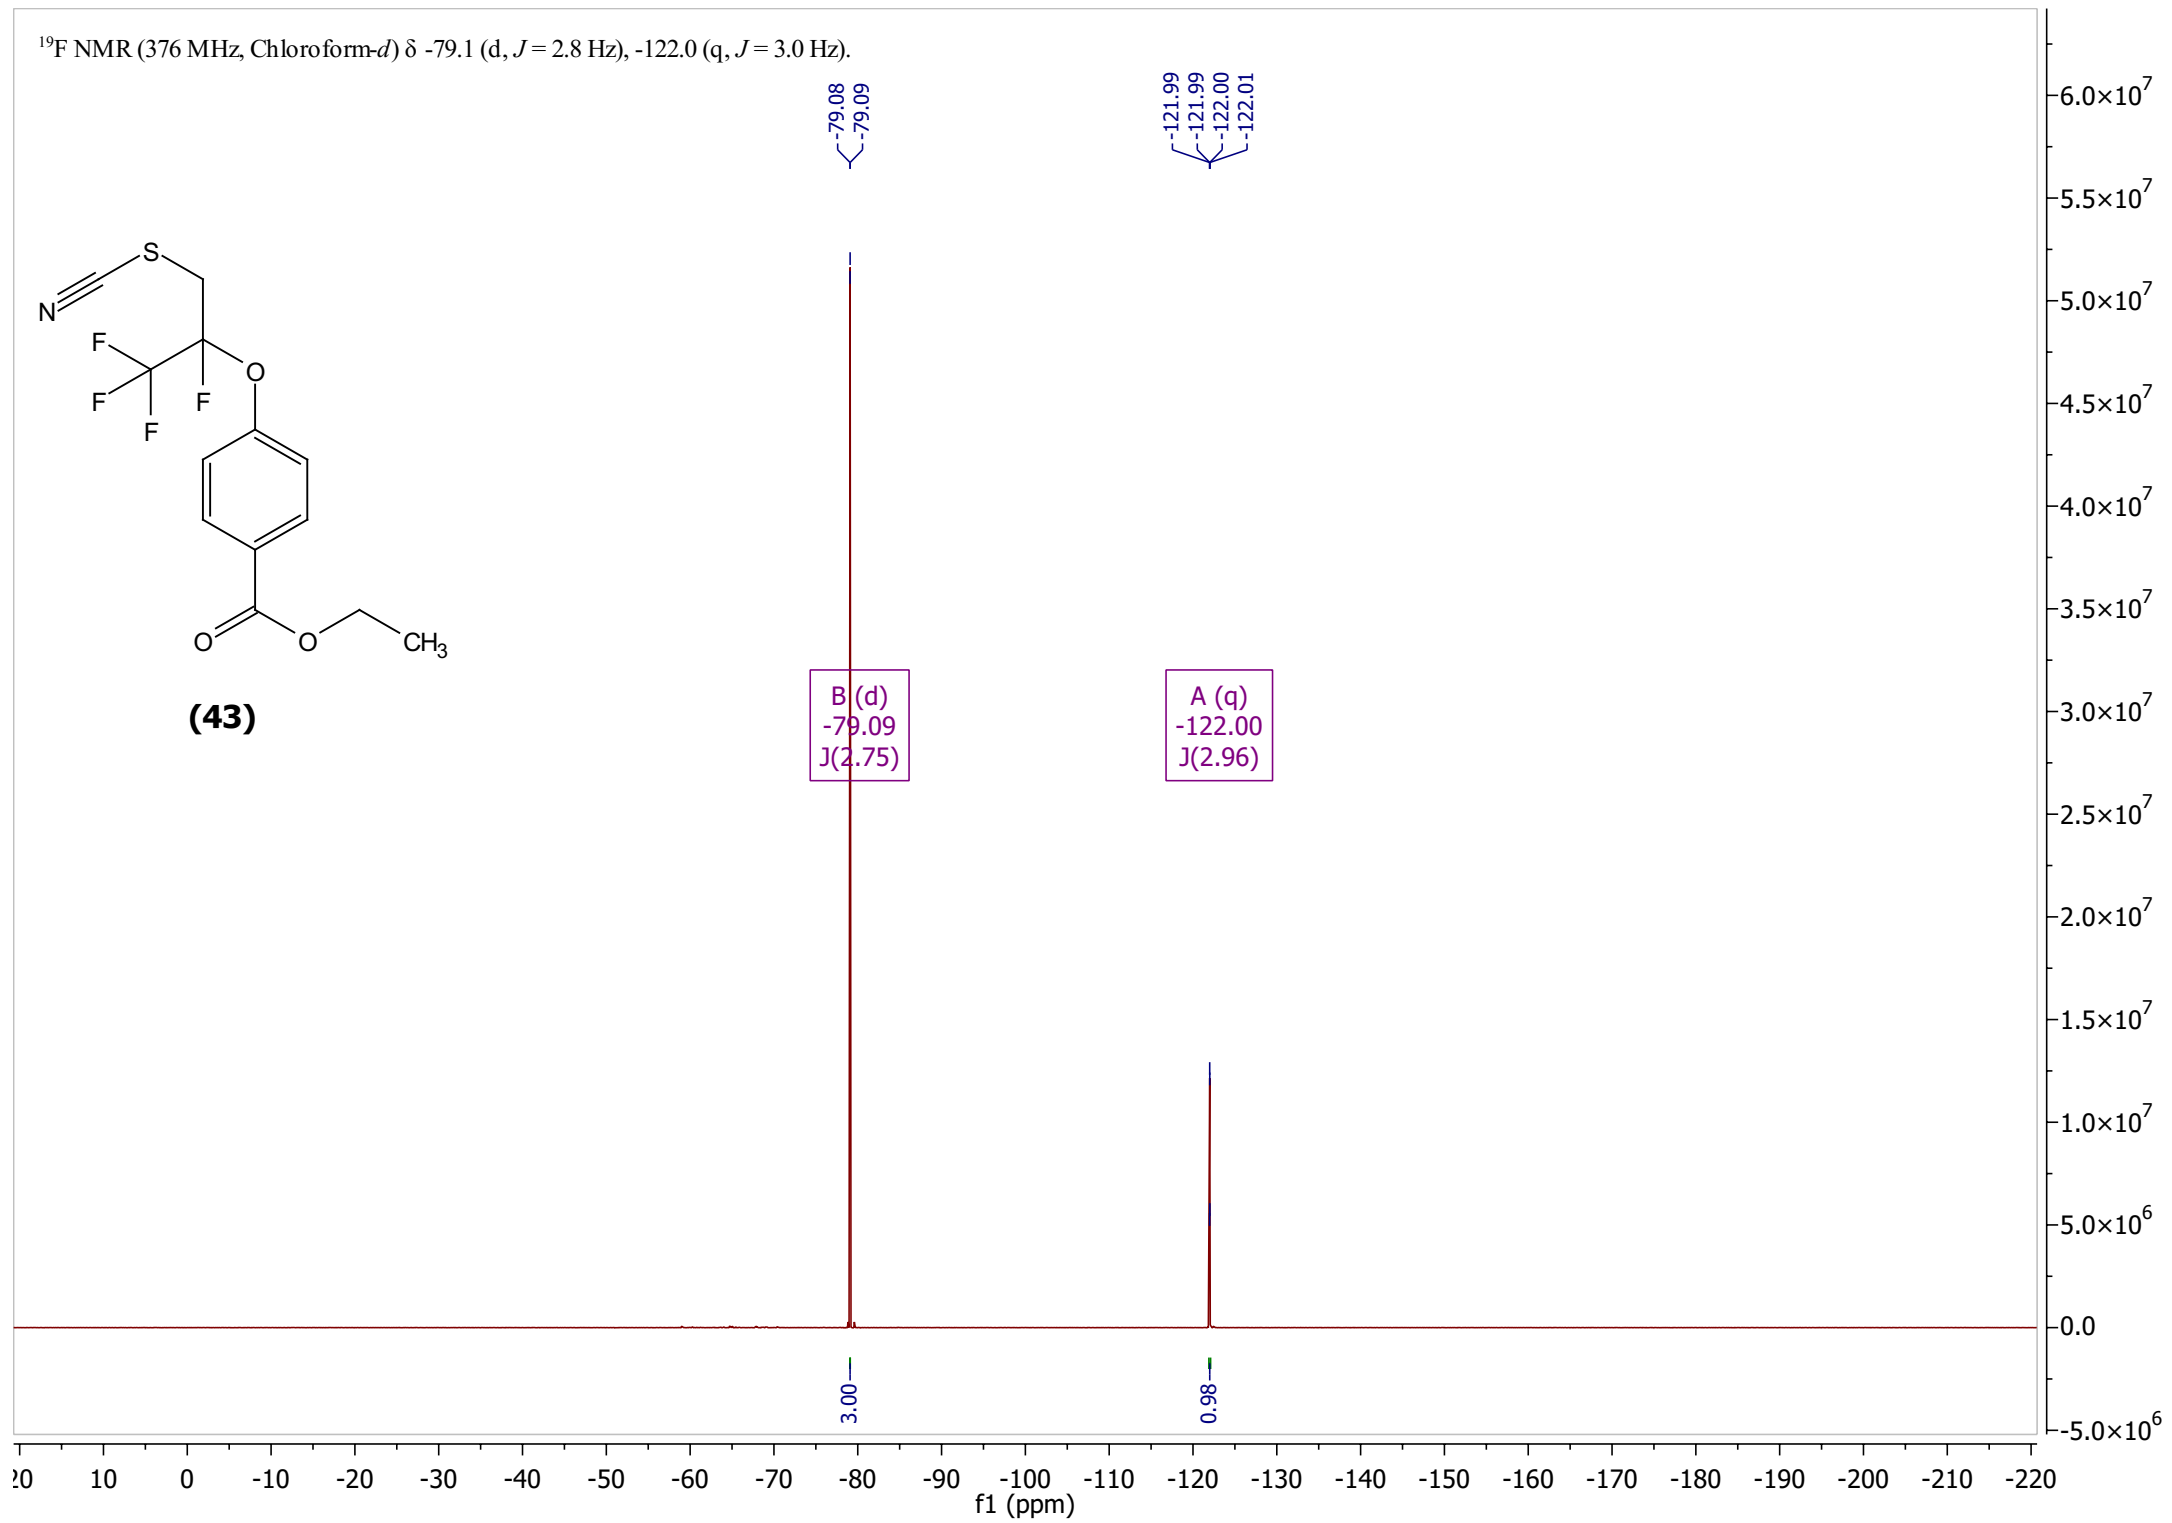

$^{13}\text{C}$  NMR (101 MHz, Chloroform-*d*)  $\delta$  165.6, 154.7, 131.6, 128.9, 121.9 (d,  $J = 2.5$  Hz), 120.0 (qd,  $J = 289.5, 39.6$  Hz), 110.3, 107.3 (dq,  $J = 243.0, 34.8$  Hz), 61.4, 35.5 (d,  $J = 27.4$  Hz), 14.4.



(43)

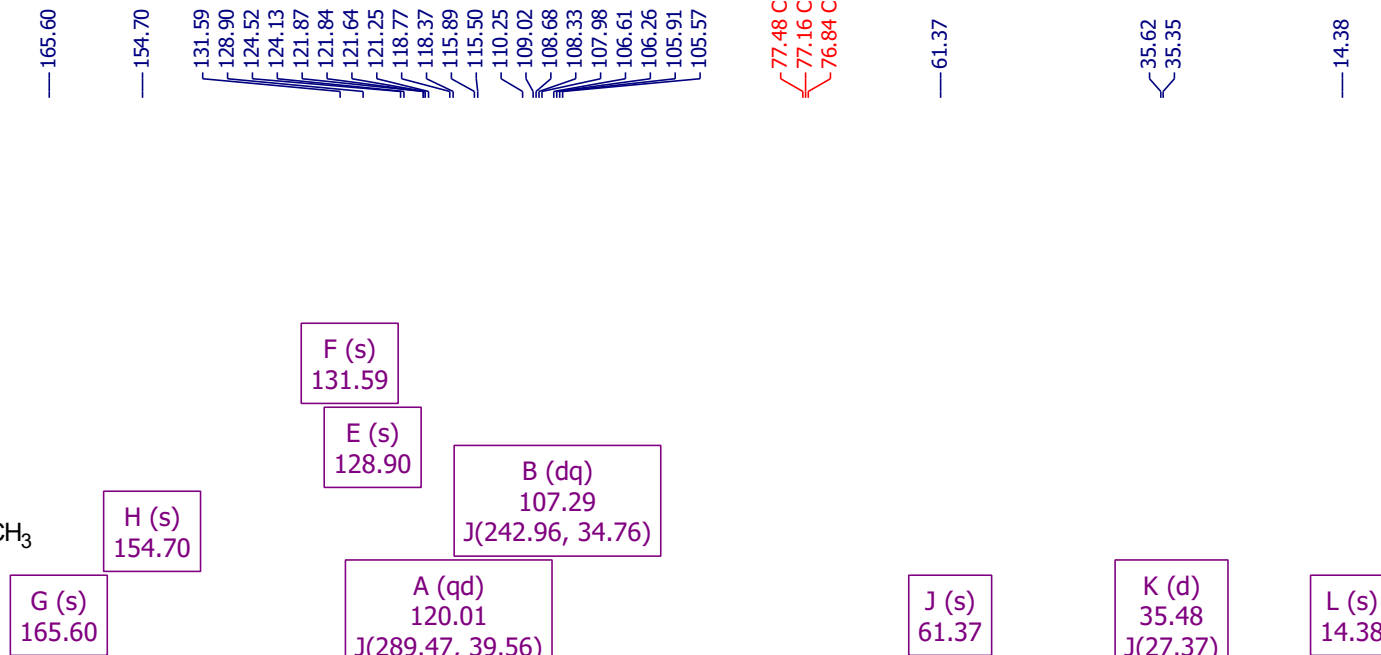

210 200 190 180 170 160 150 140 130 120 110 100 90 80 70 60 50 40 30 20 10 0 -10  
f1 (ppm)

$^1\text{H}$  NMR (400 MHz, Chloroform-*d*)  $\delta$  8.22 (d,  $J = 8.9$  Hz, 1H), 8.05 (d,  $J = 8.9$  Hz, 2H), 7.95 (d,  $J = 8.8$  Hz, 2H), 7.16 (d,  $J = 8.4$  Hz, 2H), 4.72 (dd,  $J = 13.0, 6.2$  Hz, 1H), 4.62 (t,  $J = 11.5$  Hz, 1H), 4.28 (q,  $J = 7.1$  Hz, 2H), 1.30 (t,  $J = 7.2$  Hz, 3H).

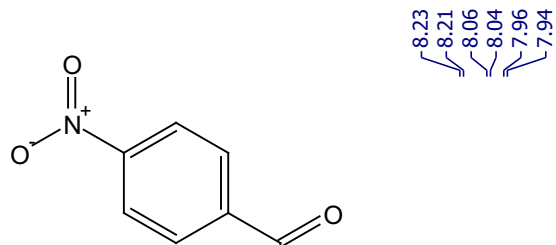

8.23  
8.21  
8.06  
8.04  
7.96

7.17  
7.15

4.74  
4.73  
4.71  
4.69  
4.65  
4.63  
4.59  
4.51  
4.29  
4.27  
4.25

1.32  
1.30  
1.28

(44)

B (d)  
8.05  
J(8.86)

A (d)  
8.22  
J(8.90)

I (d)  
7.95  
J(8.77)

D (d)  
7.16  
J(8.39)

F (t)  
4.62  
J(11.50)

E (q)  
4.28  
J(7.13)

G (dd)  
4.72  
J(12.98, 6.16)

H (t)  
1.30  
J(7.19)

1.99  
2.04  
2.00

1.99

0.97  
0.97  
2.05

3.07

f1 (ppm)

$^{19}\text{F}$  NMR (376 MHz, Chloroform-*d*)  $\delta$  -81.6 (d,  $J = 2.8$  Hz), -125.5 (q,  $J = 3.0$  Hz).

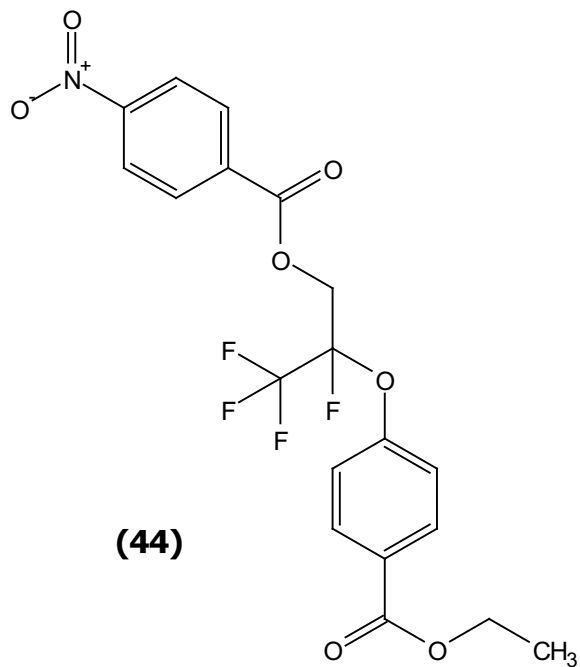

-81.59  
-81.60

-125.53  
-125.54  
-125.55  
-125.55

B (d)  
-81.59  
J(2.81)

A (q)  
-125.54  
J(2.98)

3.00

1.00

20 10 0 -10 -20 -30 -40 -50 -60 -70 -80 -90 -100 -110 -120 -130 -140 -150 -160 -170 -180 -190 -200 -210 -220  
f1 (ppm)

1.00×10<sup>8</sup>  
9.00×10<sup>7</sup>  
8.00×10<sup>7</sup>  
7.00×10<sup>7</sup>  
6.00×10<sup>7</sup>  
5.00×10<sup>7</sup>  
4.00×10<sup>7</sup>  
3.00×10<sup>7</sup>  
2.00×10<sup>7</sup>  
1.00×10<sup>7</sup>  
0.00

$^{13}\text{C}$  NMR (101 MHz, Chloroform-*d*)  $\delta$  165.5, 163.1, 154.7 (d,  $J = 1.4$  Hz), 151.1, 133.8, 131.7, 131.1, 128.8, 123.9, 121.7 (d,  $J = 2.4$  Hz), 120.0 (qd,  $J = 286.8, 34.8$  Hz), 107.0 (dq,  $J = 239.8, 35.1$  Hz), 61.4, 60.1 (d,  $J = 37.8$  Hz), 14.4.

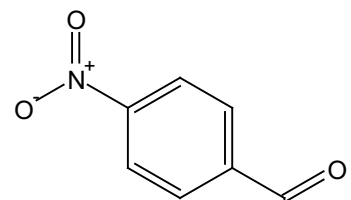

(44)

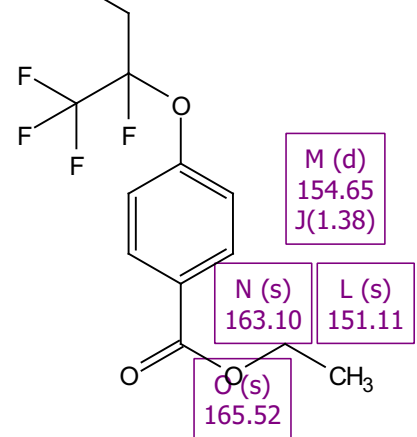

165.52  
163.10  
154.66  
154.64  
151.11  
133.82  
131.67  
131.07  
128.76  
124.44  
124.09  
123.87  
121.71  
121.69  
121.59  
121.24  
118.74  
118.39  
115.89  
115.54  
108.68  
108.33  
107.98  
107.64  
106.30  
105.95  
105.60

77.48 CDCl<sub>3</sub>  
77.16 CDCl<sub>3</sub>  
76.84 CDCl<sub>3</sub>

61.38  
60.29  
59.92

14.35

I (s)  
131.07

K (s)  
133.82

E (d)  
121.70  
J(2.41)

G (dq)  
106.97  
J(239.84, 35.08)

D (qd)  
119.99  
J(285.76, 34.83)

F (s)  
123.87

H (s)  
128.76

J (s)  
131.67

A (d)  
60.11  
J(37.78)

B (s)  
61.38

C (s)  
14.35

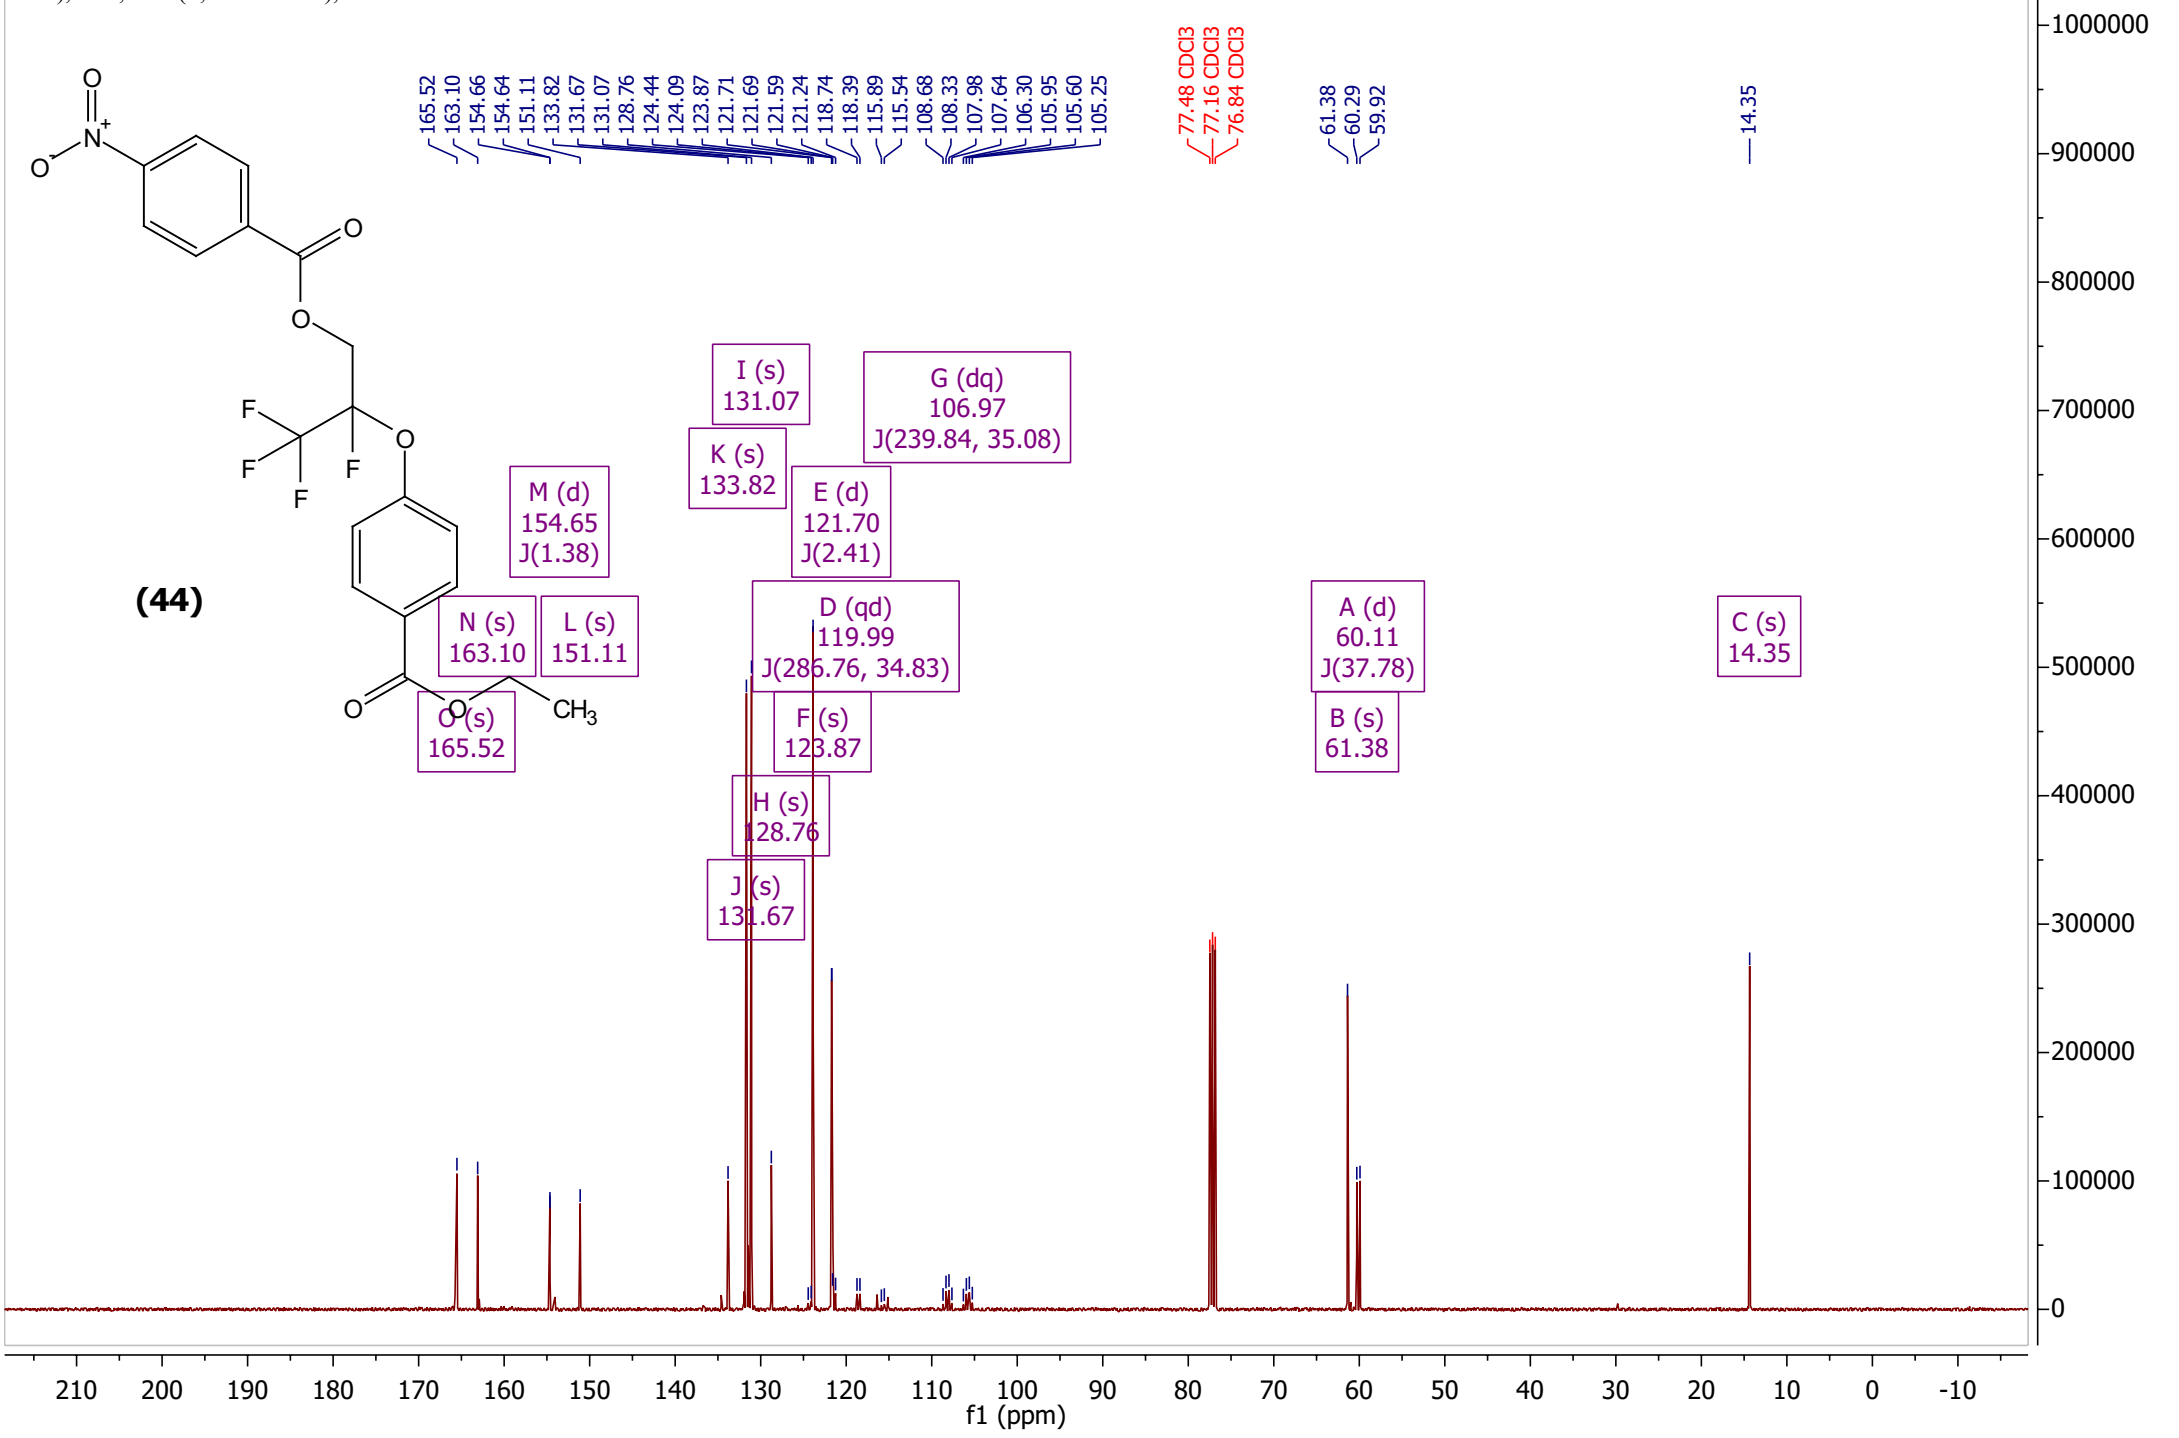



$^1\text{H}$  NMR (400 MHz, Chloroform- $d$ )  $\delta$  8.21 (d,  $J = 7.6$  Hz, 1H), 8.14 (d,  $J = 8.6$  Hz, 1H), 7.71 (td,  $J = 7.5, 1.6$  Hz, 1H), 7.67 (td,  $J = 7.6, 1.7$  Hz, 1H), 7.52 (d,  $J = 7.0$  Hz, 1H), 7.31 (d,  $J = 8.6$  Hz, 2H), 4.95 (s, 1H), 4.90 (s, 1H), 4.39 (q,  $J = 7.2$  Hz, 2H), 1.40 (t,  $J = 7.2$  Hz, 3H).

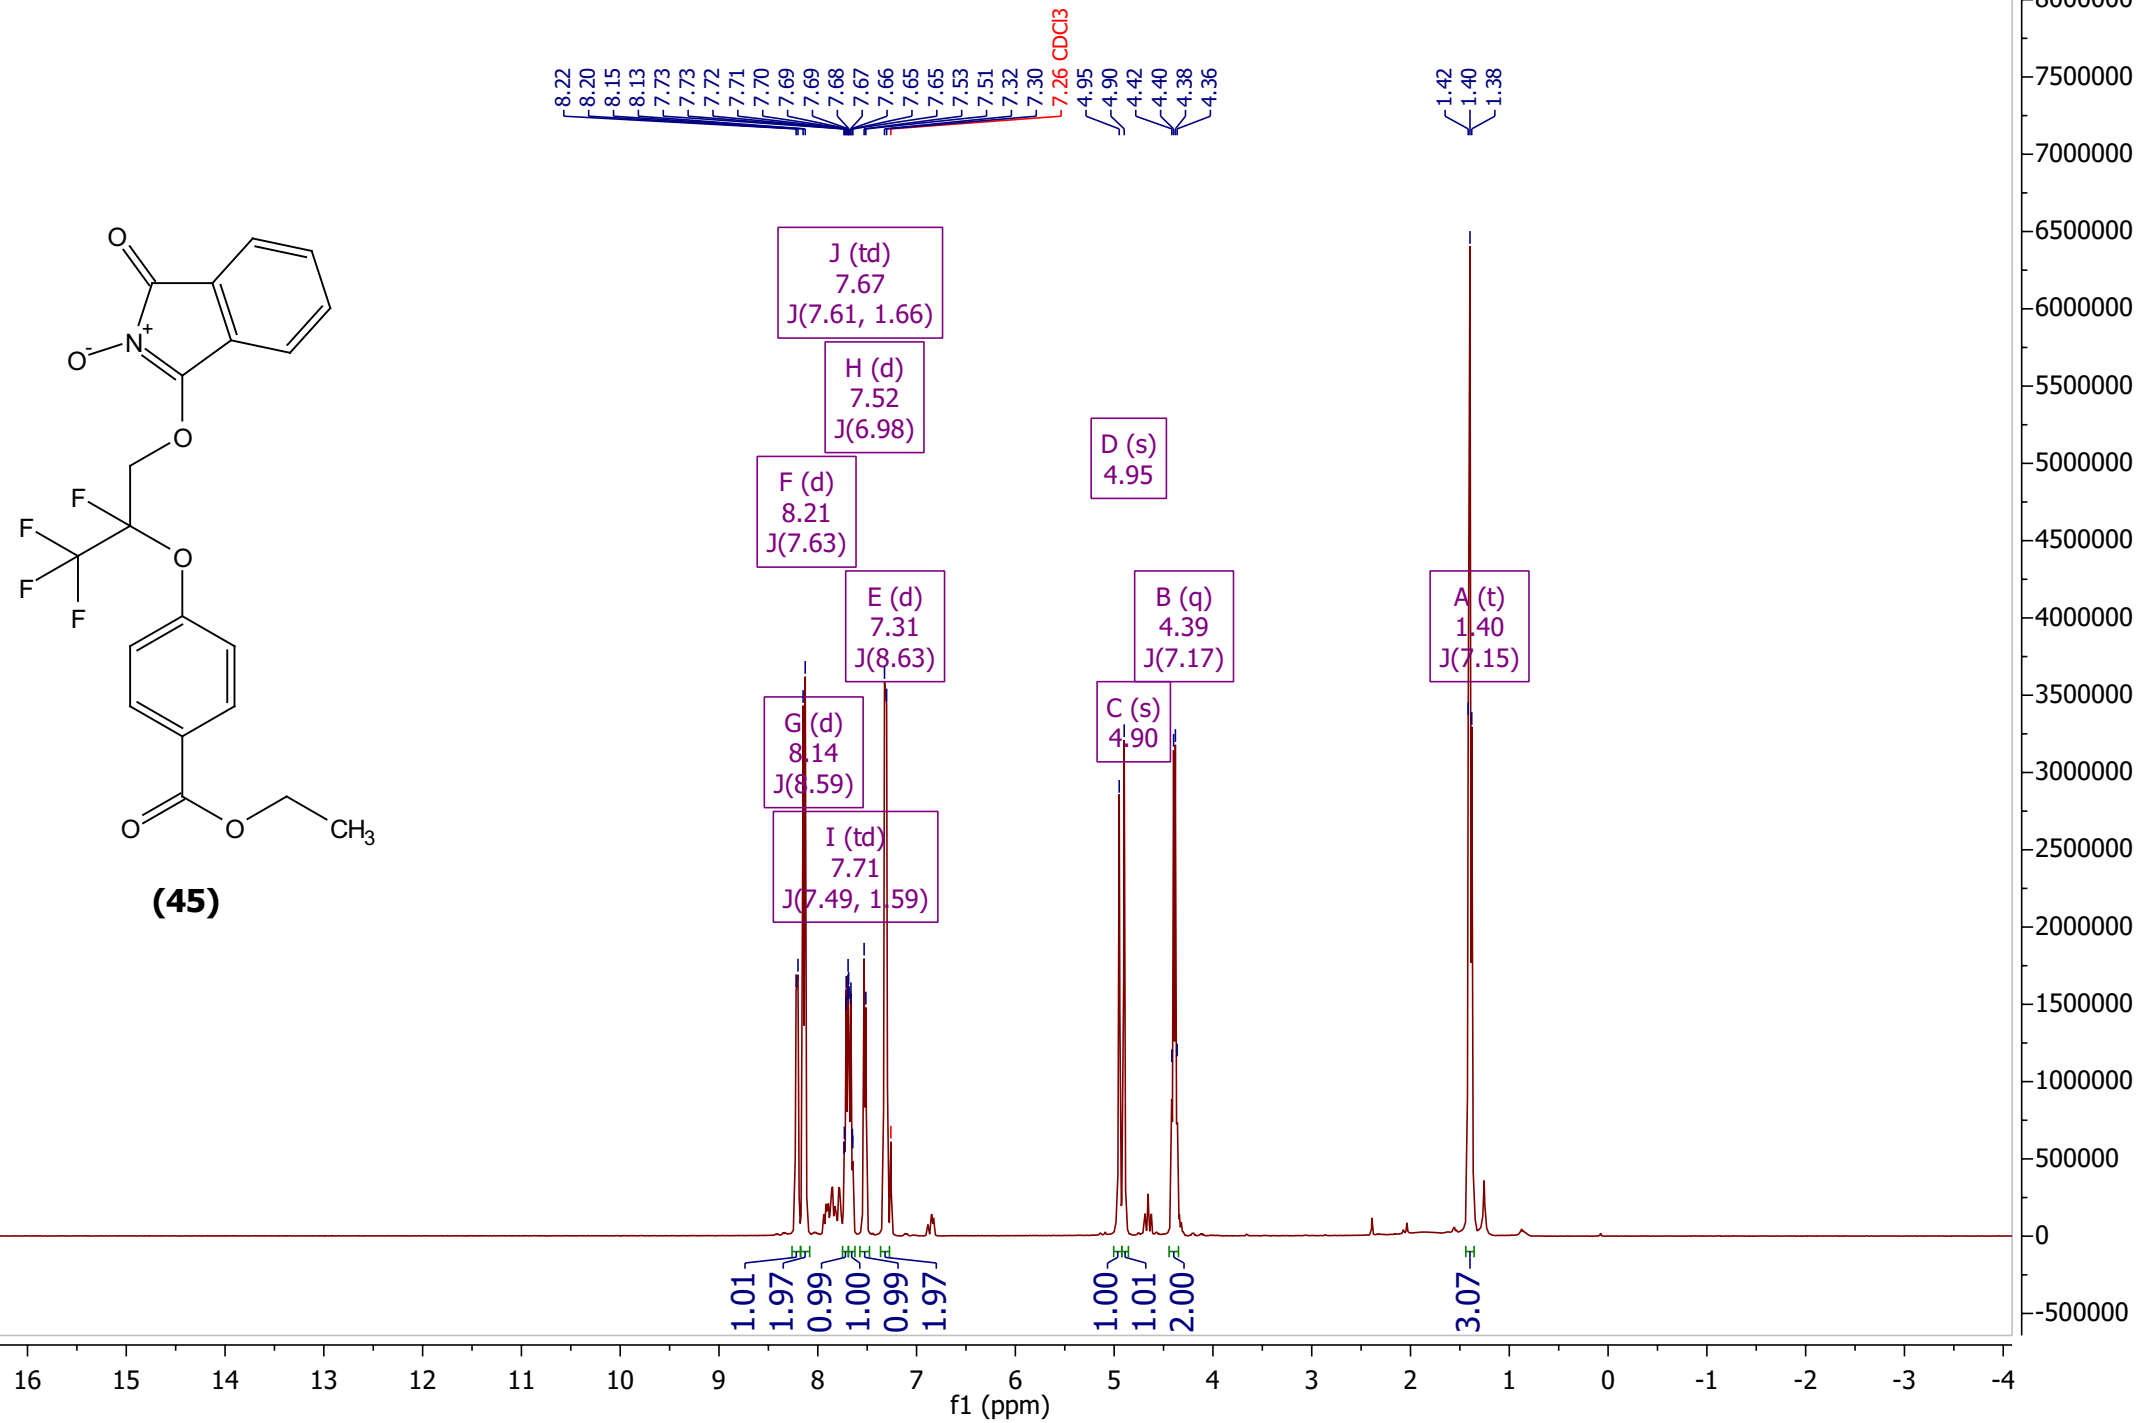

$^{19}\text{F}$  NMR (376 MHz, Chloroform-*d*)  $\delta$  -85.7 (d,  $J = 2.8$  Hz), -114.7 (q,  $J = 3.3$  Hz).

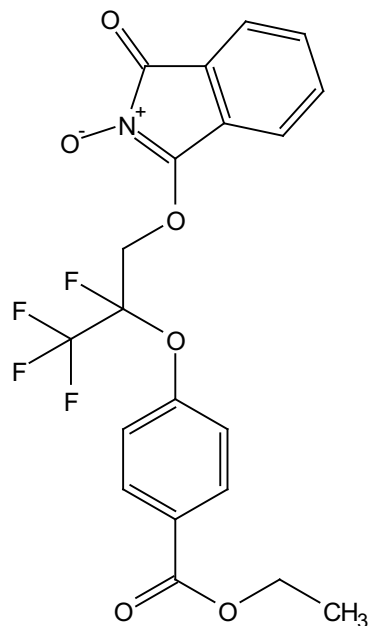

**(45)**

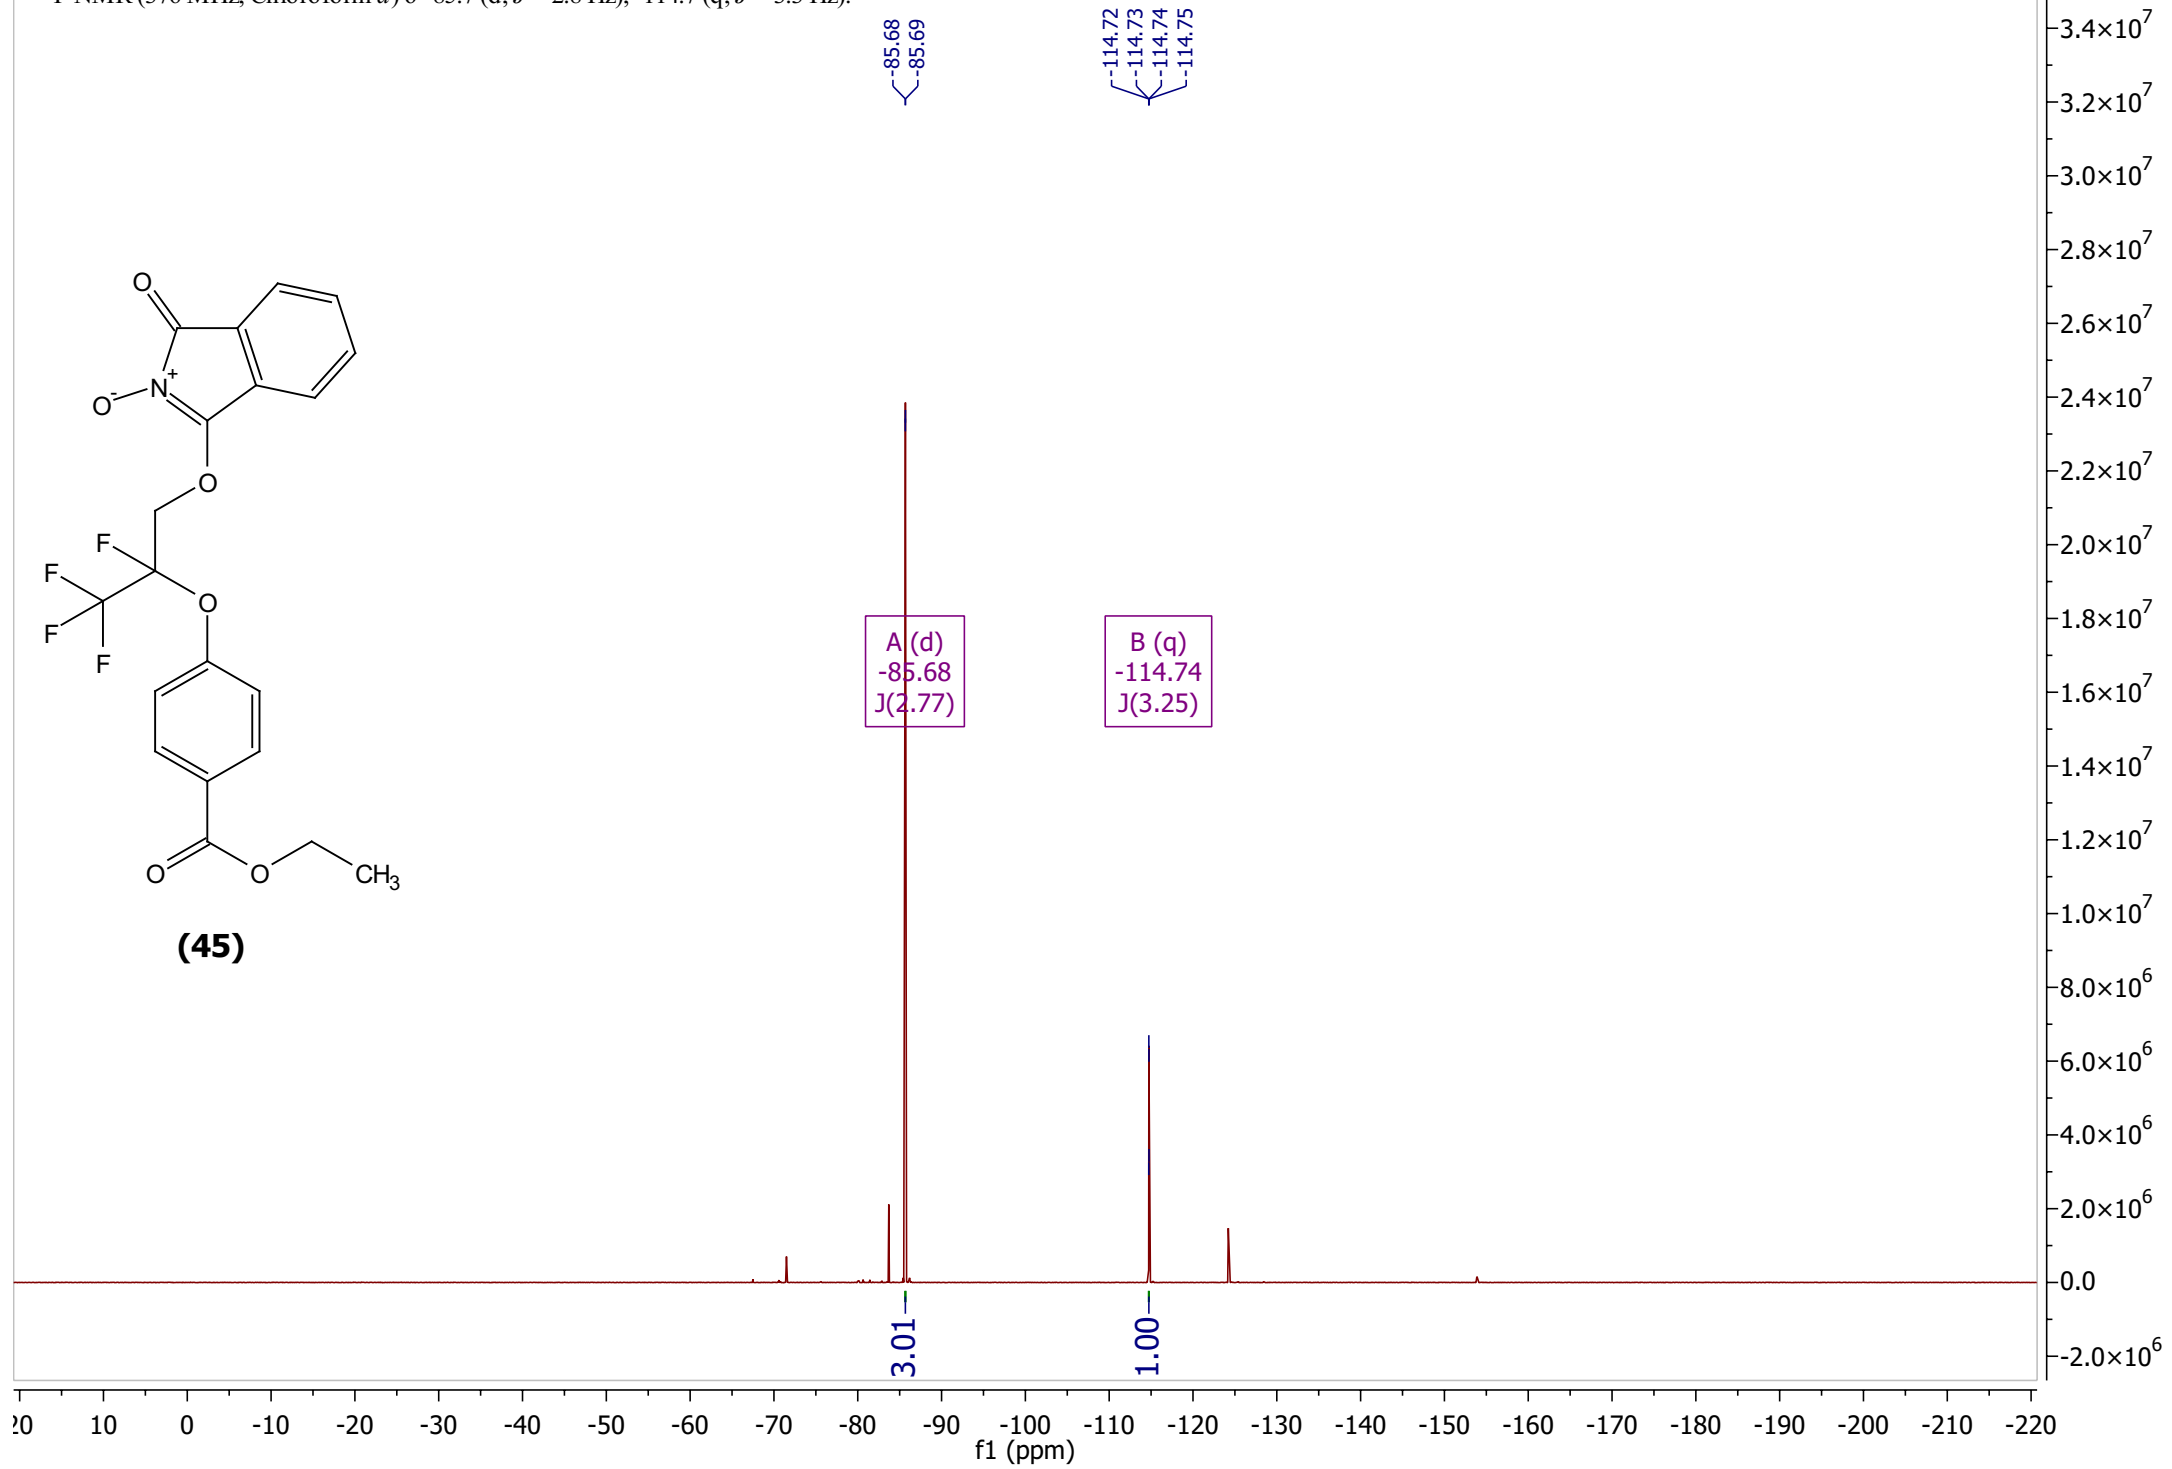

$^{13}\text{C}$  NMR (101 MHz, Chloroform-*d*)  $\delta$  178.5, 165.9, 164.0, 154.3, 133.5, 133.5, 131.4, 131.4, 130.8, 128.8, 128.5, 128.4, 121.7, 118.6 (qd,  $J = 281.5, 44.3$  Hz), 107.4 (dq,  $J = 271.6, 41.2$  Hz), 61.3, 58.4 (d,  $J = 24.3$  Hz), 14.4.

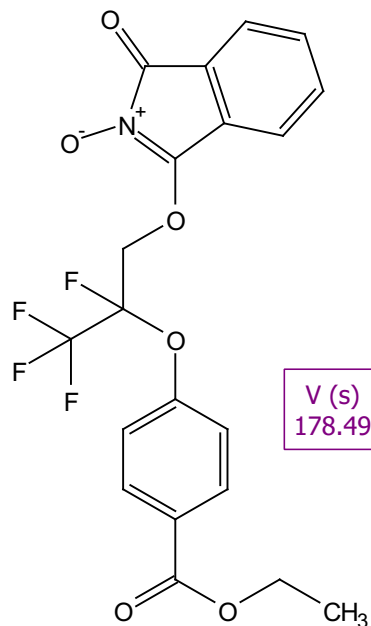

**(45)**

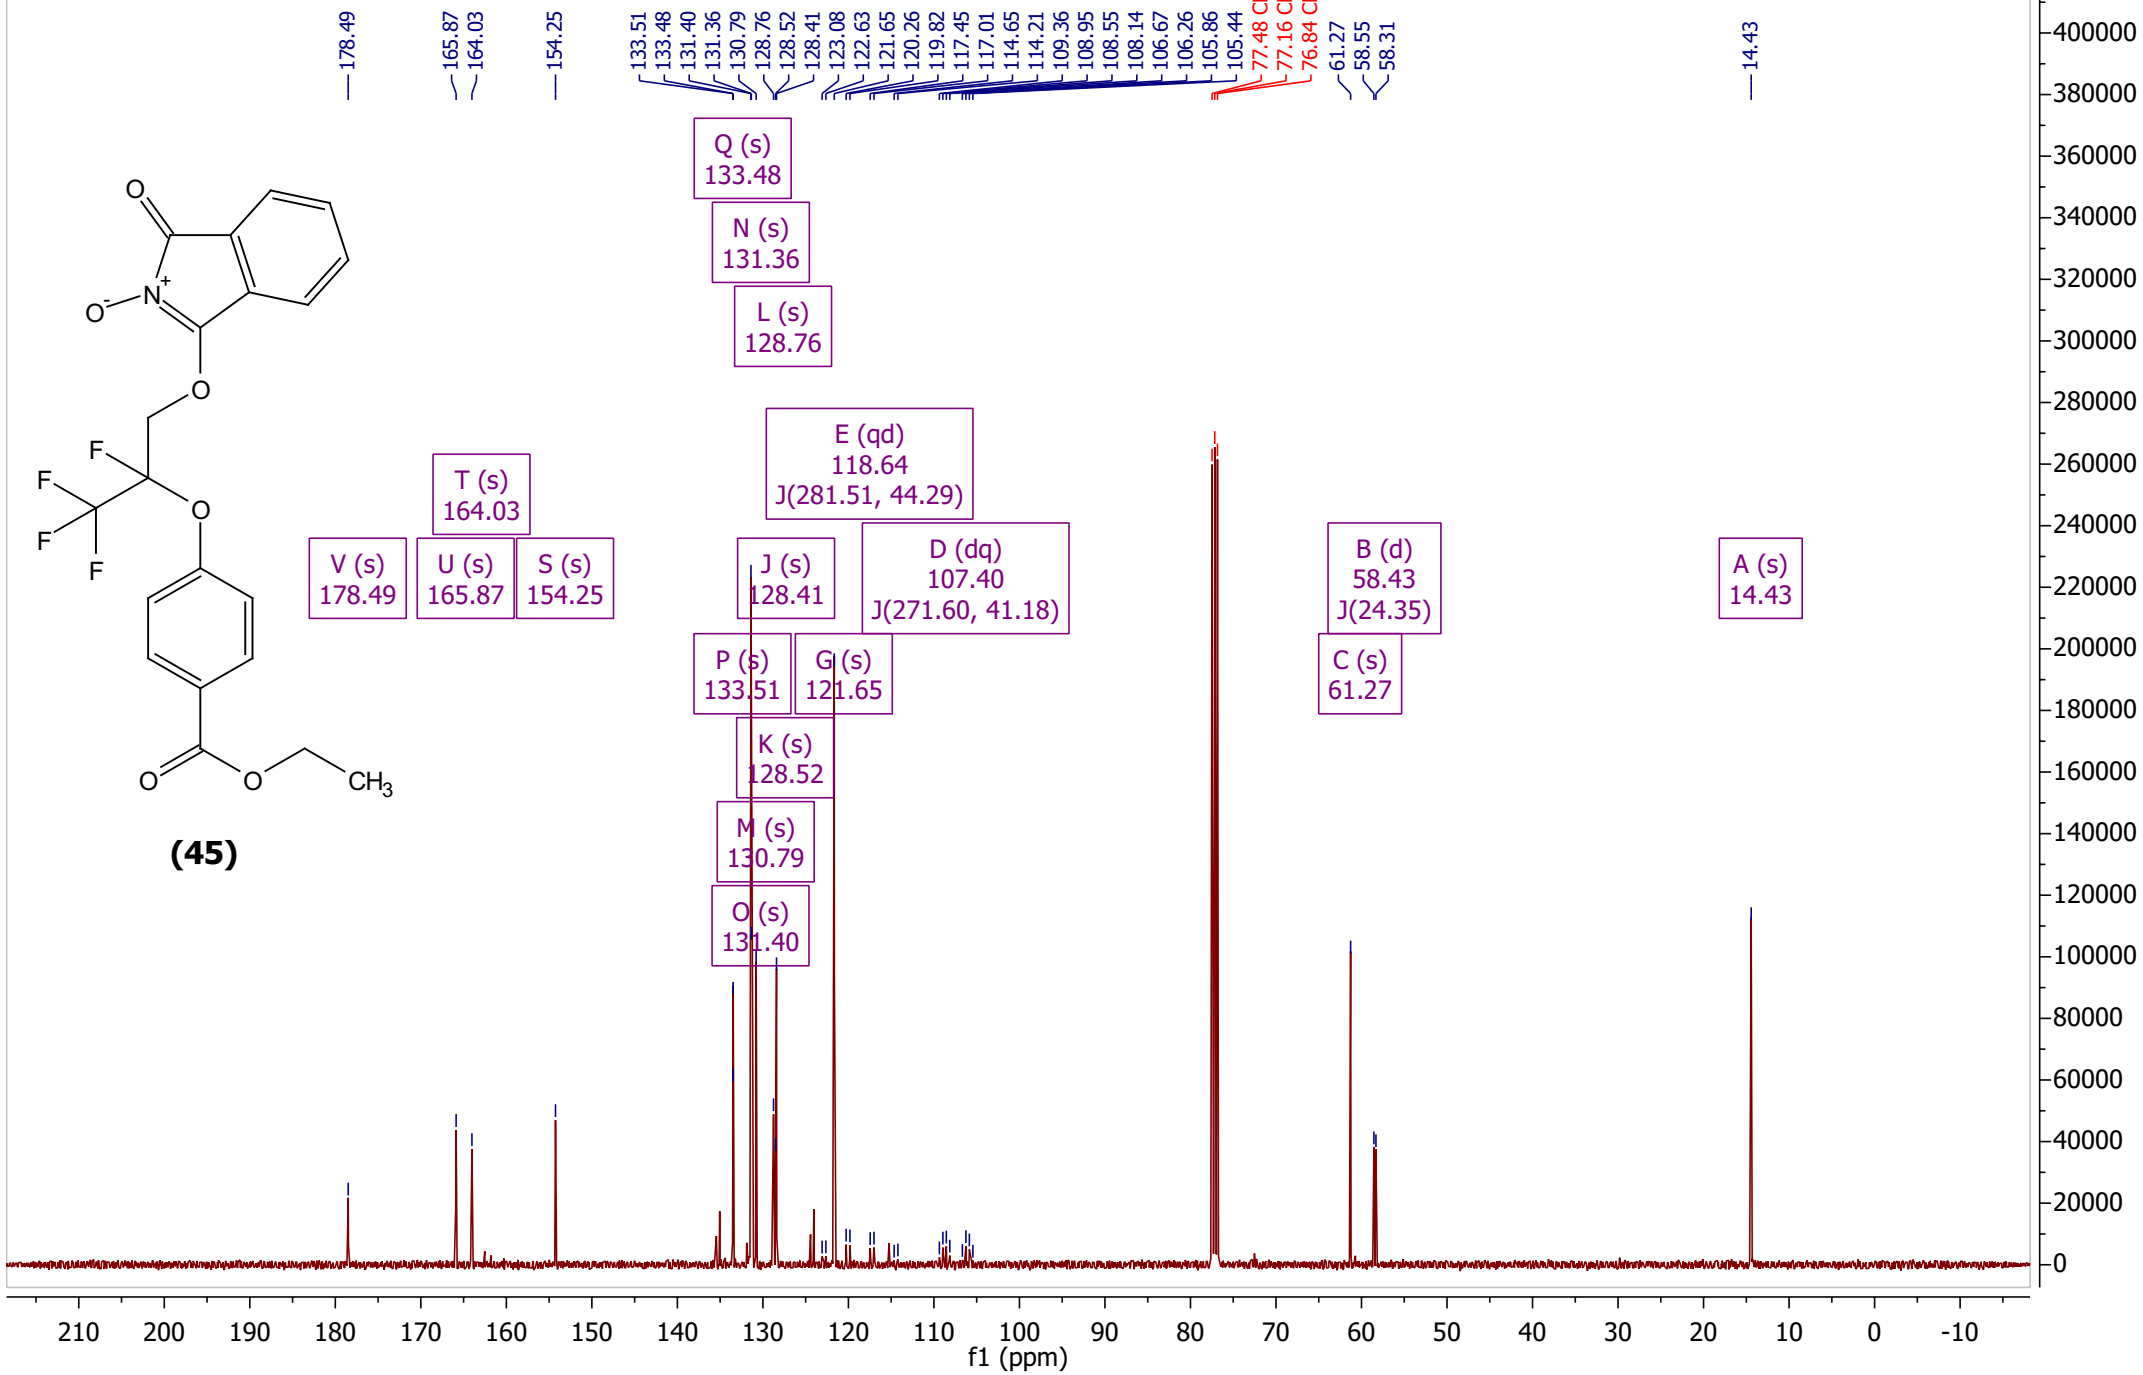

$^1\text{H}$  NMR (400 MHz, Chloroform-*d*)  $\delta$  8.63 (d,  $J = 2.8$  Hz, 1H), 8.31 (dd,  $J = 9.2, 2.8$  Hz, 1H), 7.92 (d,  $J = 8.8$  Hz, 2H), 7.21 (d,  $J = 8.3$  Hz, 2H), 7.03 (d,  $J = 9.3$  Hz, 1H), 4.54 (dd,  $J = 11.3, 3.9$  Hz, 1H), 4.44 (dd,  $J = 11.3, 6.3$  Hz, 1H), 4.25 (q,  $J = 7.1$  Hz, 2H), 1.28 (t,  $J = 7.2$  Hz, 3H).

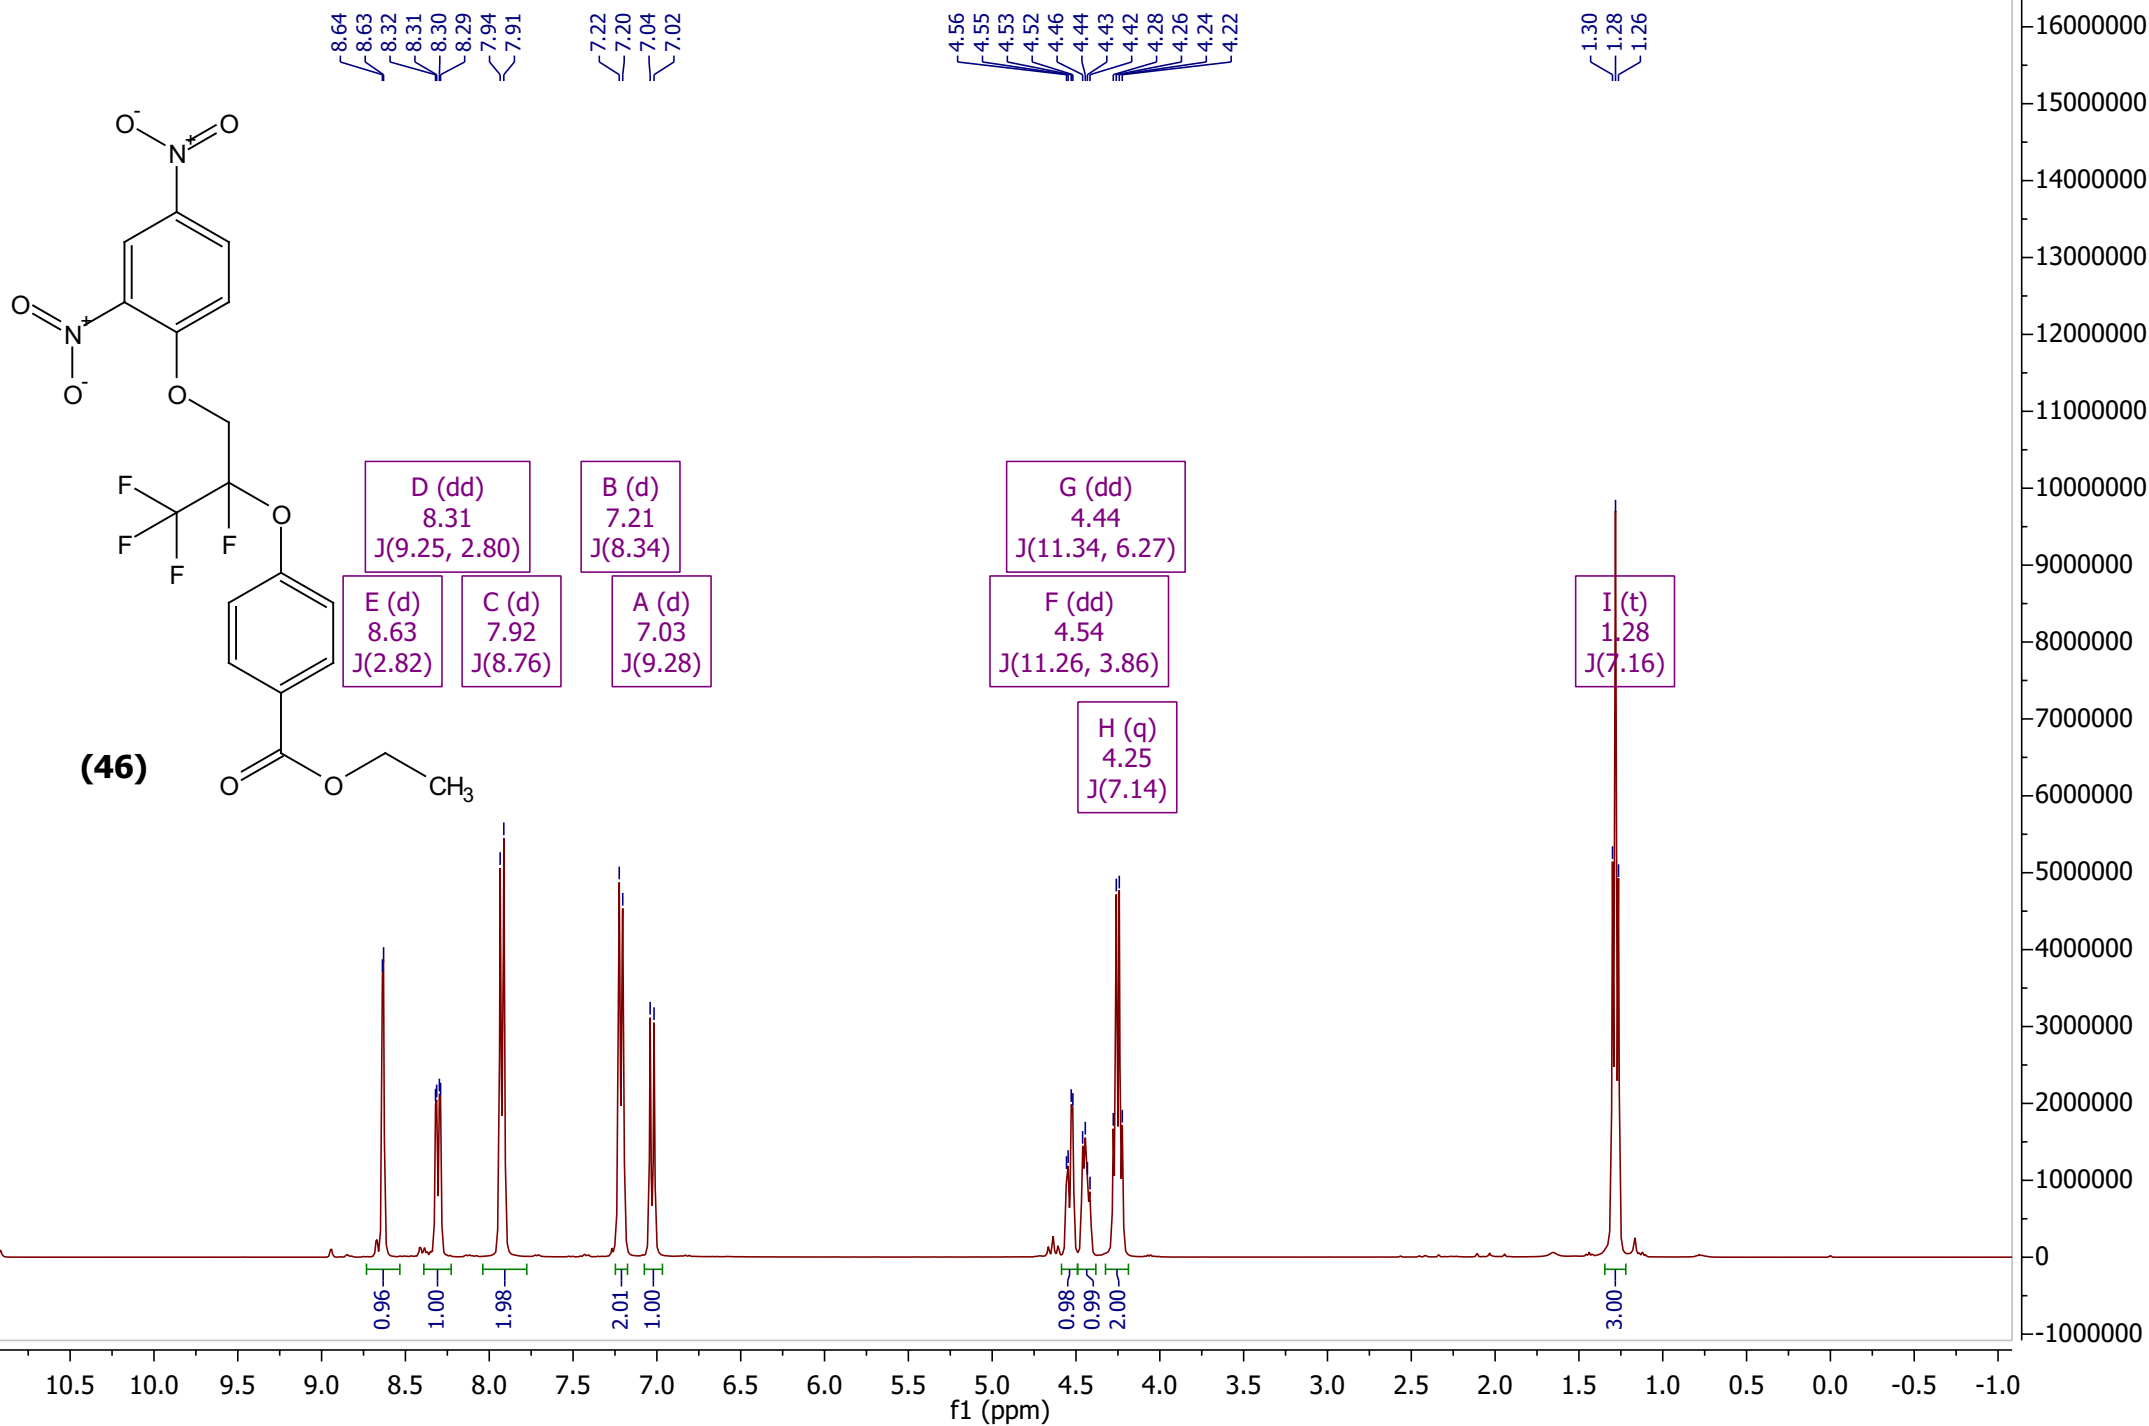

$^{19}\text{F}$  NMR (376 MHz, Chloroform-*d*)  $\delta$  -81.2 (d,  $J = 3.4$  Hz), -124.3 (q,  $J = 3.4$  Hz).

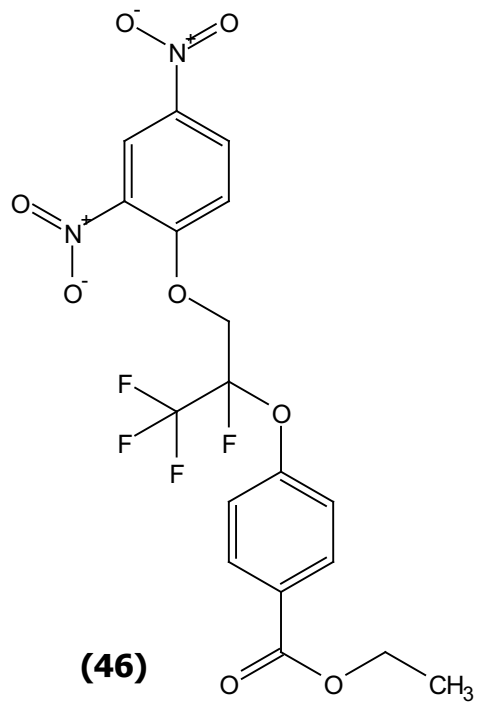

-81.15  
-81.16

B (d)  
-81.15  
J(3.37)

-124.32  
-124.33  
-124.34  
-124.35

A (q)  
-124.33  
J(3.40)

3.00

1.03

20 10 0 -10 -20 -30 -40 -50 -60 -70 -80 -90 -100 -110 -120 -130 -140 -150 -160 -170 -180 -190 -200 -210 -220  
f1 (ppm)

9.0×10<sup>7</sup>  
8.0×10<sup>7</sup>  
7.0×10<sup>7</sup>  
6.0×10<sup>7</sup>  
5.0×10<sup>7</sup>  
4.0×10<sup>7</sup>  
3.0×10<sup>7</sup>  
2.0×10<sup>7</sup>  
1.0×10<sup>7</sup>  
0.0

$^{13}\text{C}$  NMR (101 MHz, Chloroform-*d*)  $\delta$  165.5, 154.3, 141.5, 139.4, 131.6, 129.1, 129.0, 122.1 (d,  $J = 2.2$  Hz), 122.0, 119.7 (qd,  $J = 287.0, 34.2$  Hz), 114.5, 106.7 (dq,  $J = 237.1, 35.3$  Hz), 65.0 (d,  $J = 42.4$  Hz), 61.4, 14.3.

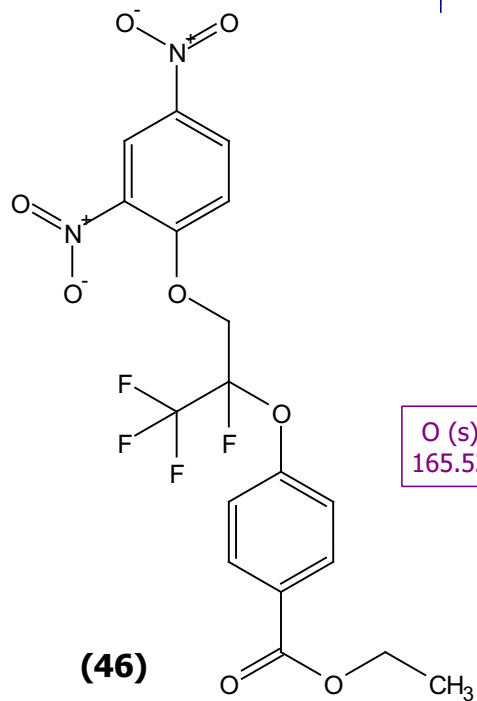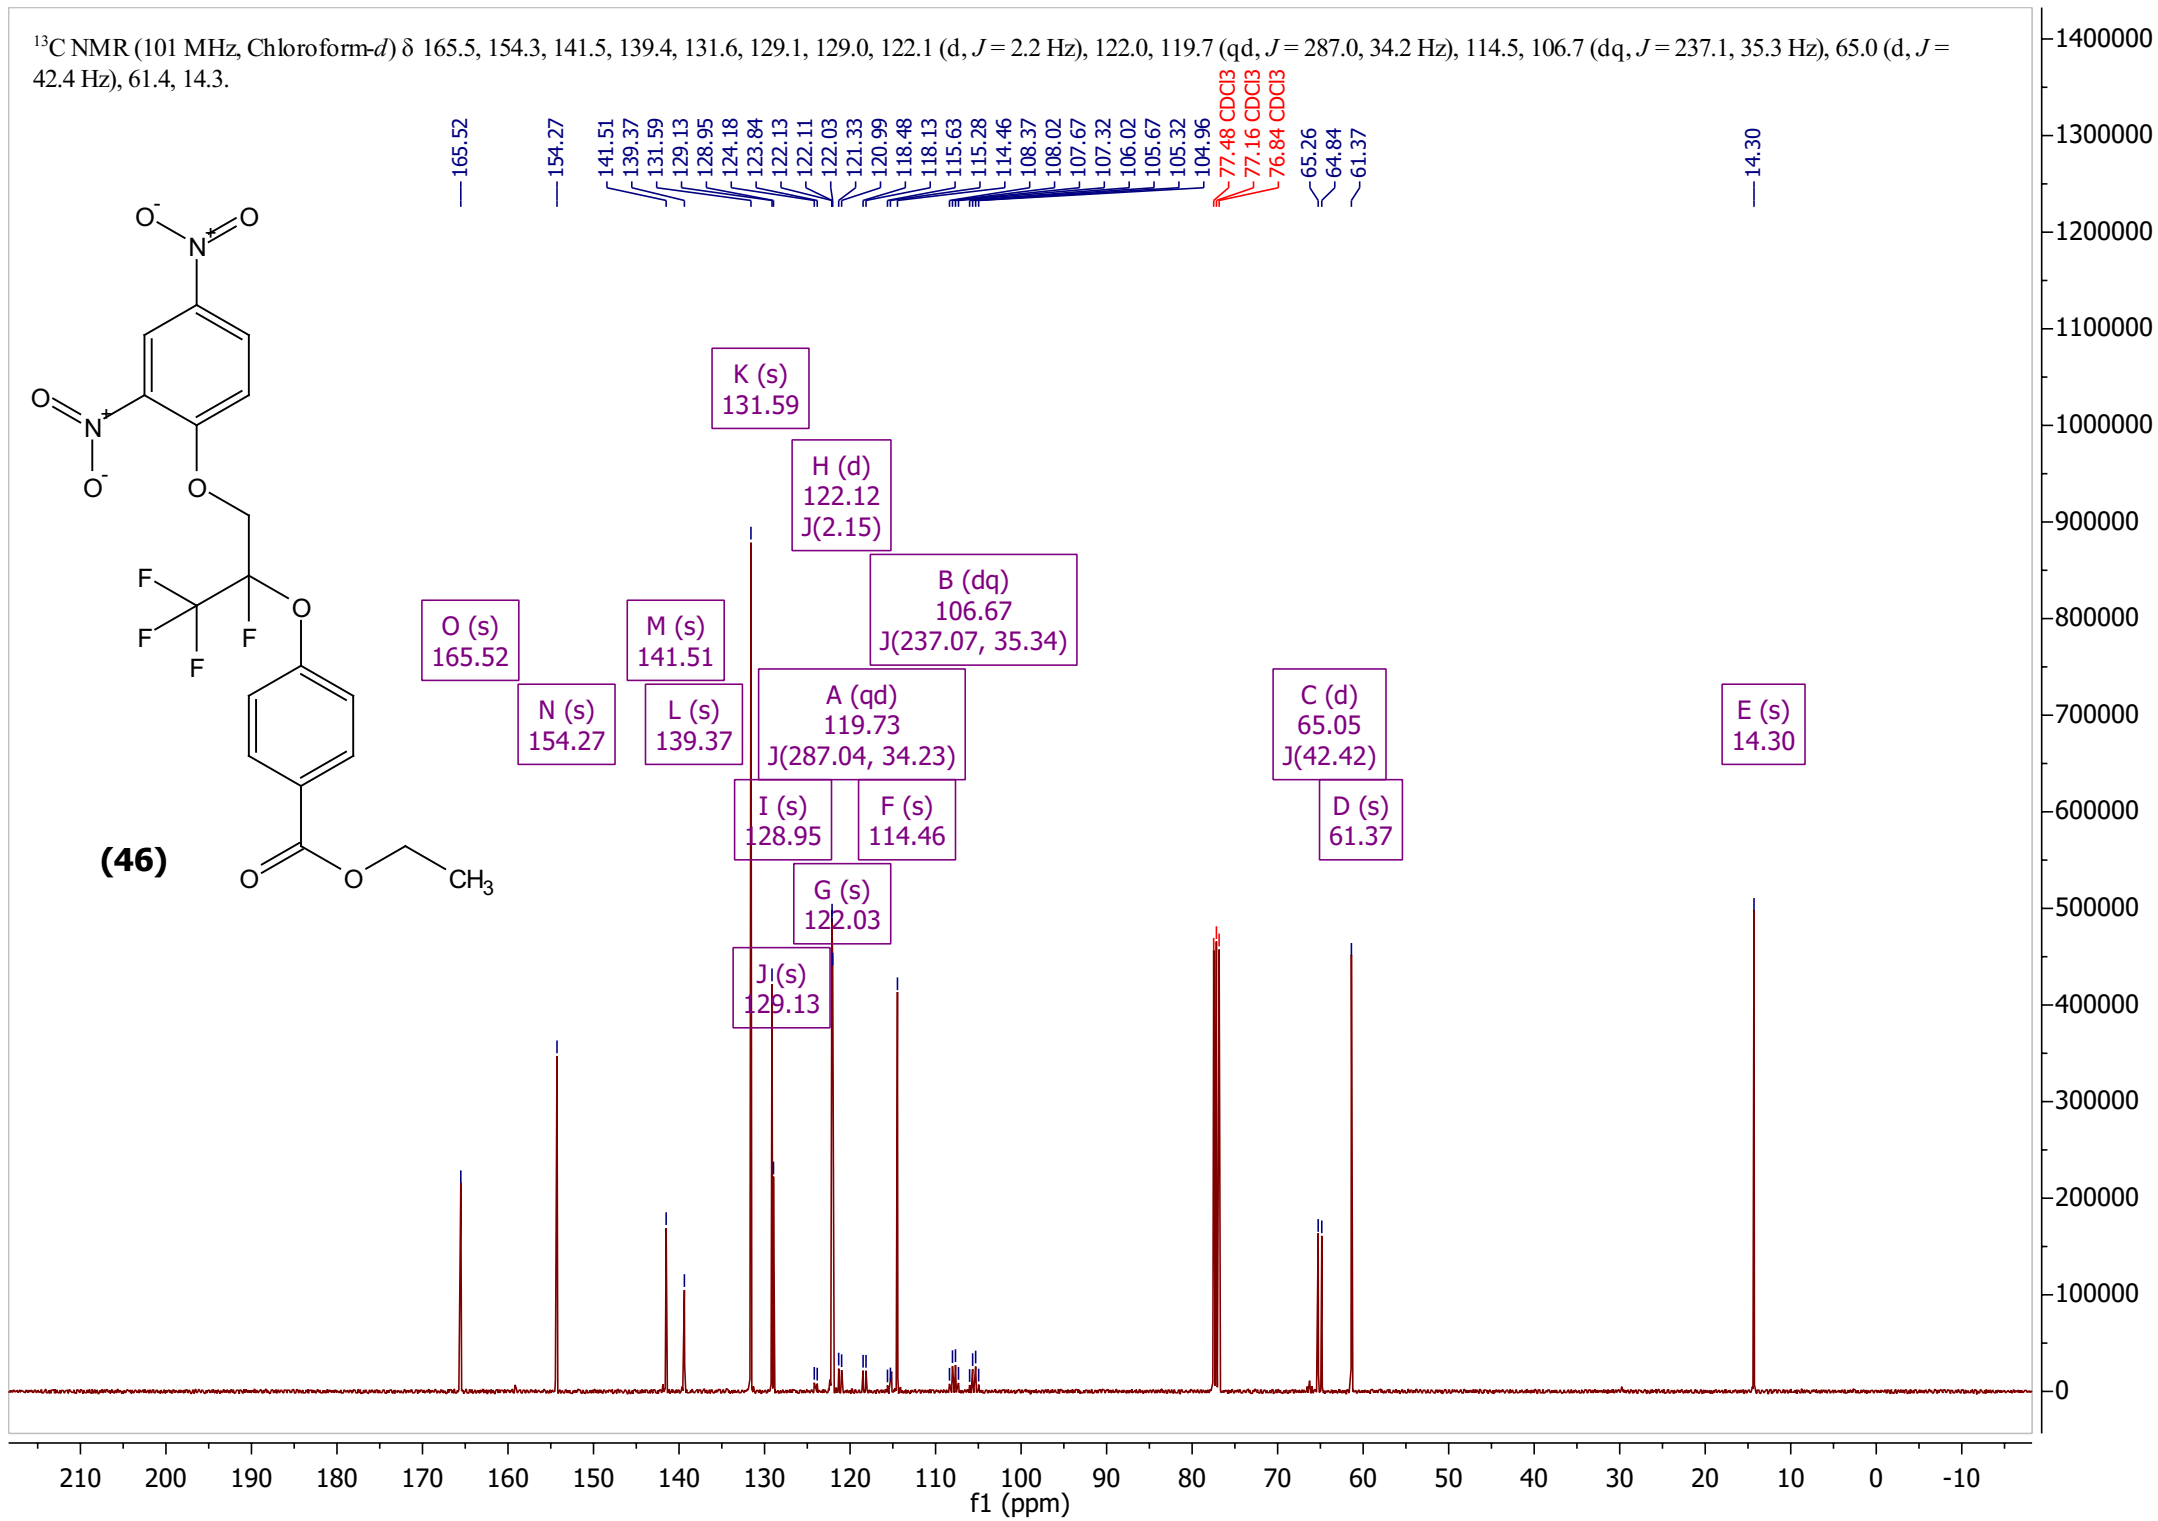

$^1\text{H}$  NMR (400 MHz, Chloroform-*d*)  $\delta$  7.97 (d,  $J$  = 8.8 Hz, 2H), 7.23 (d,  $J$  = 8.3 Hz, 2H), 4.43 (t,  $J$  = 10.1 Hz, 1H), 4.29 (q,  $J$  = 7.1 Hz, 2H), 4.22 (dd,  $J$  = 10.6, 5.2 Hz, 1H), 1.32 (t,  $J$  = 7.2 Hz, 3H).

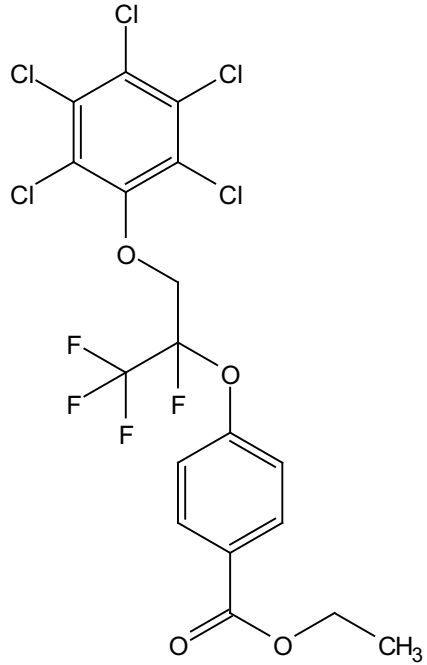

**(47)**

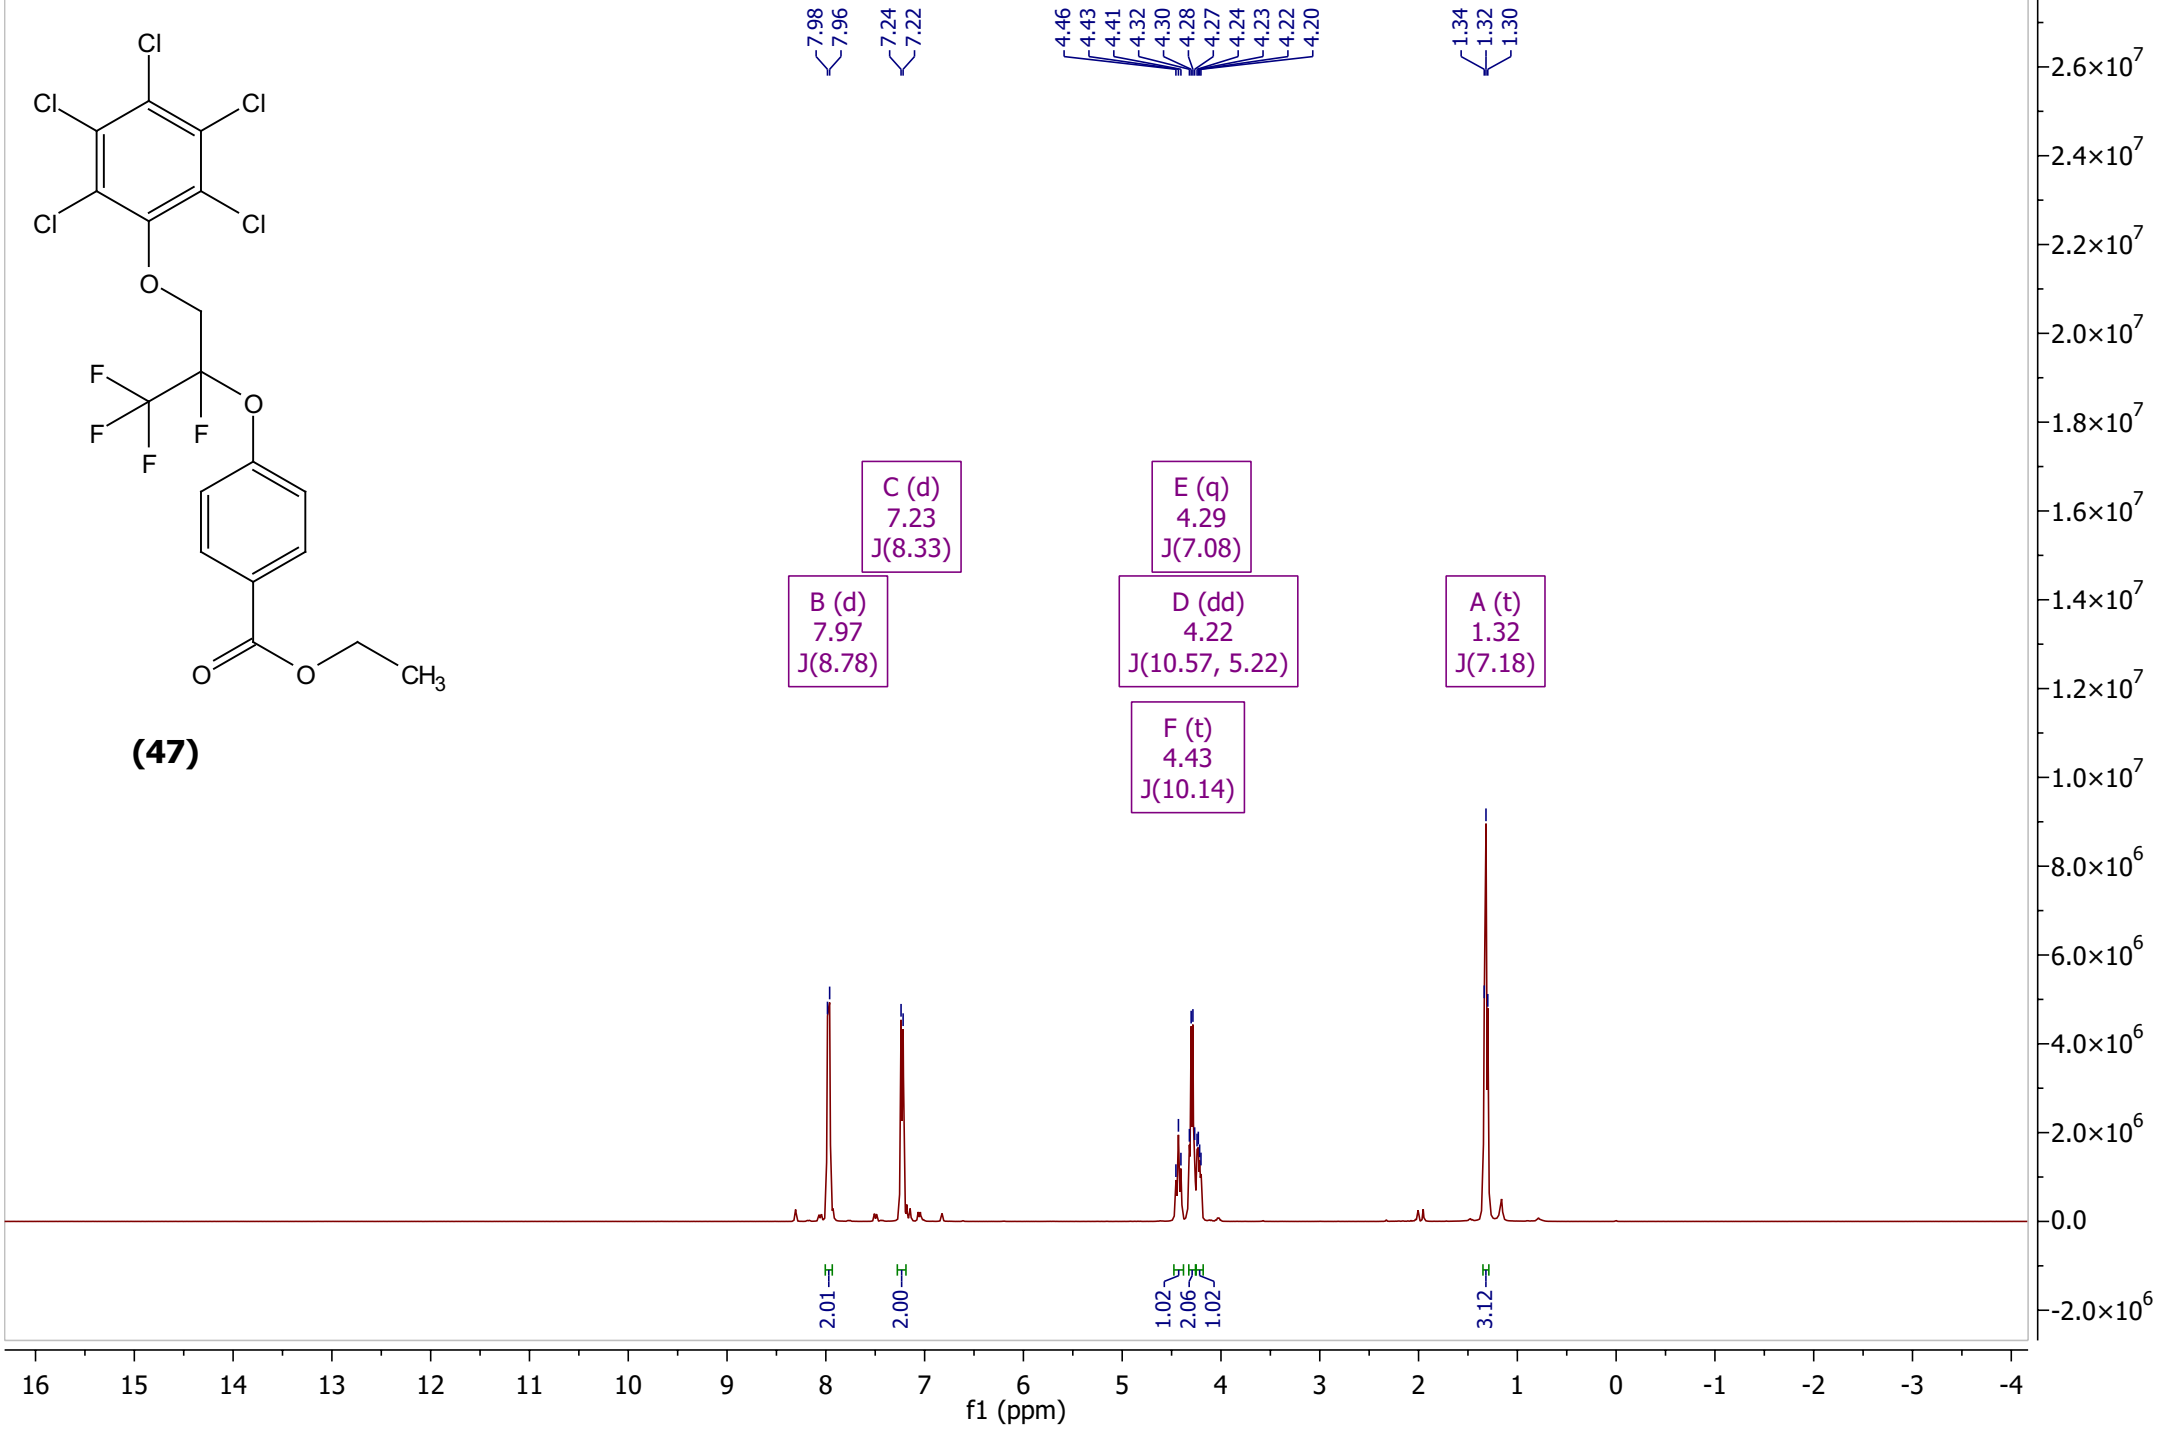

$^{19}\text{F}$  NMR (376 MHz, Chloroform-*d*)  $\delta$  -80.9 (d,  $J = 3.3$  Hz), -124.9 (q,  $J = 3.4$  Hz).

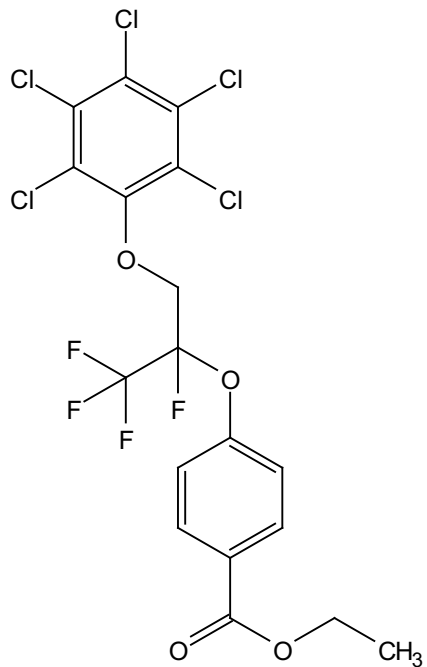

**(47)**

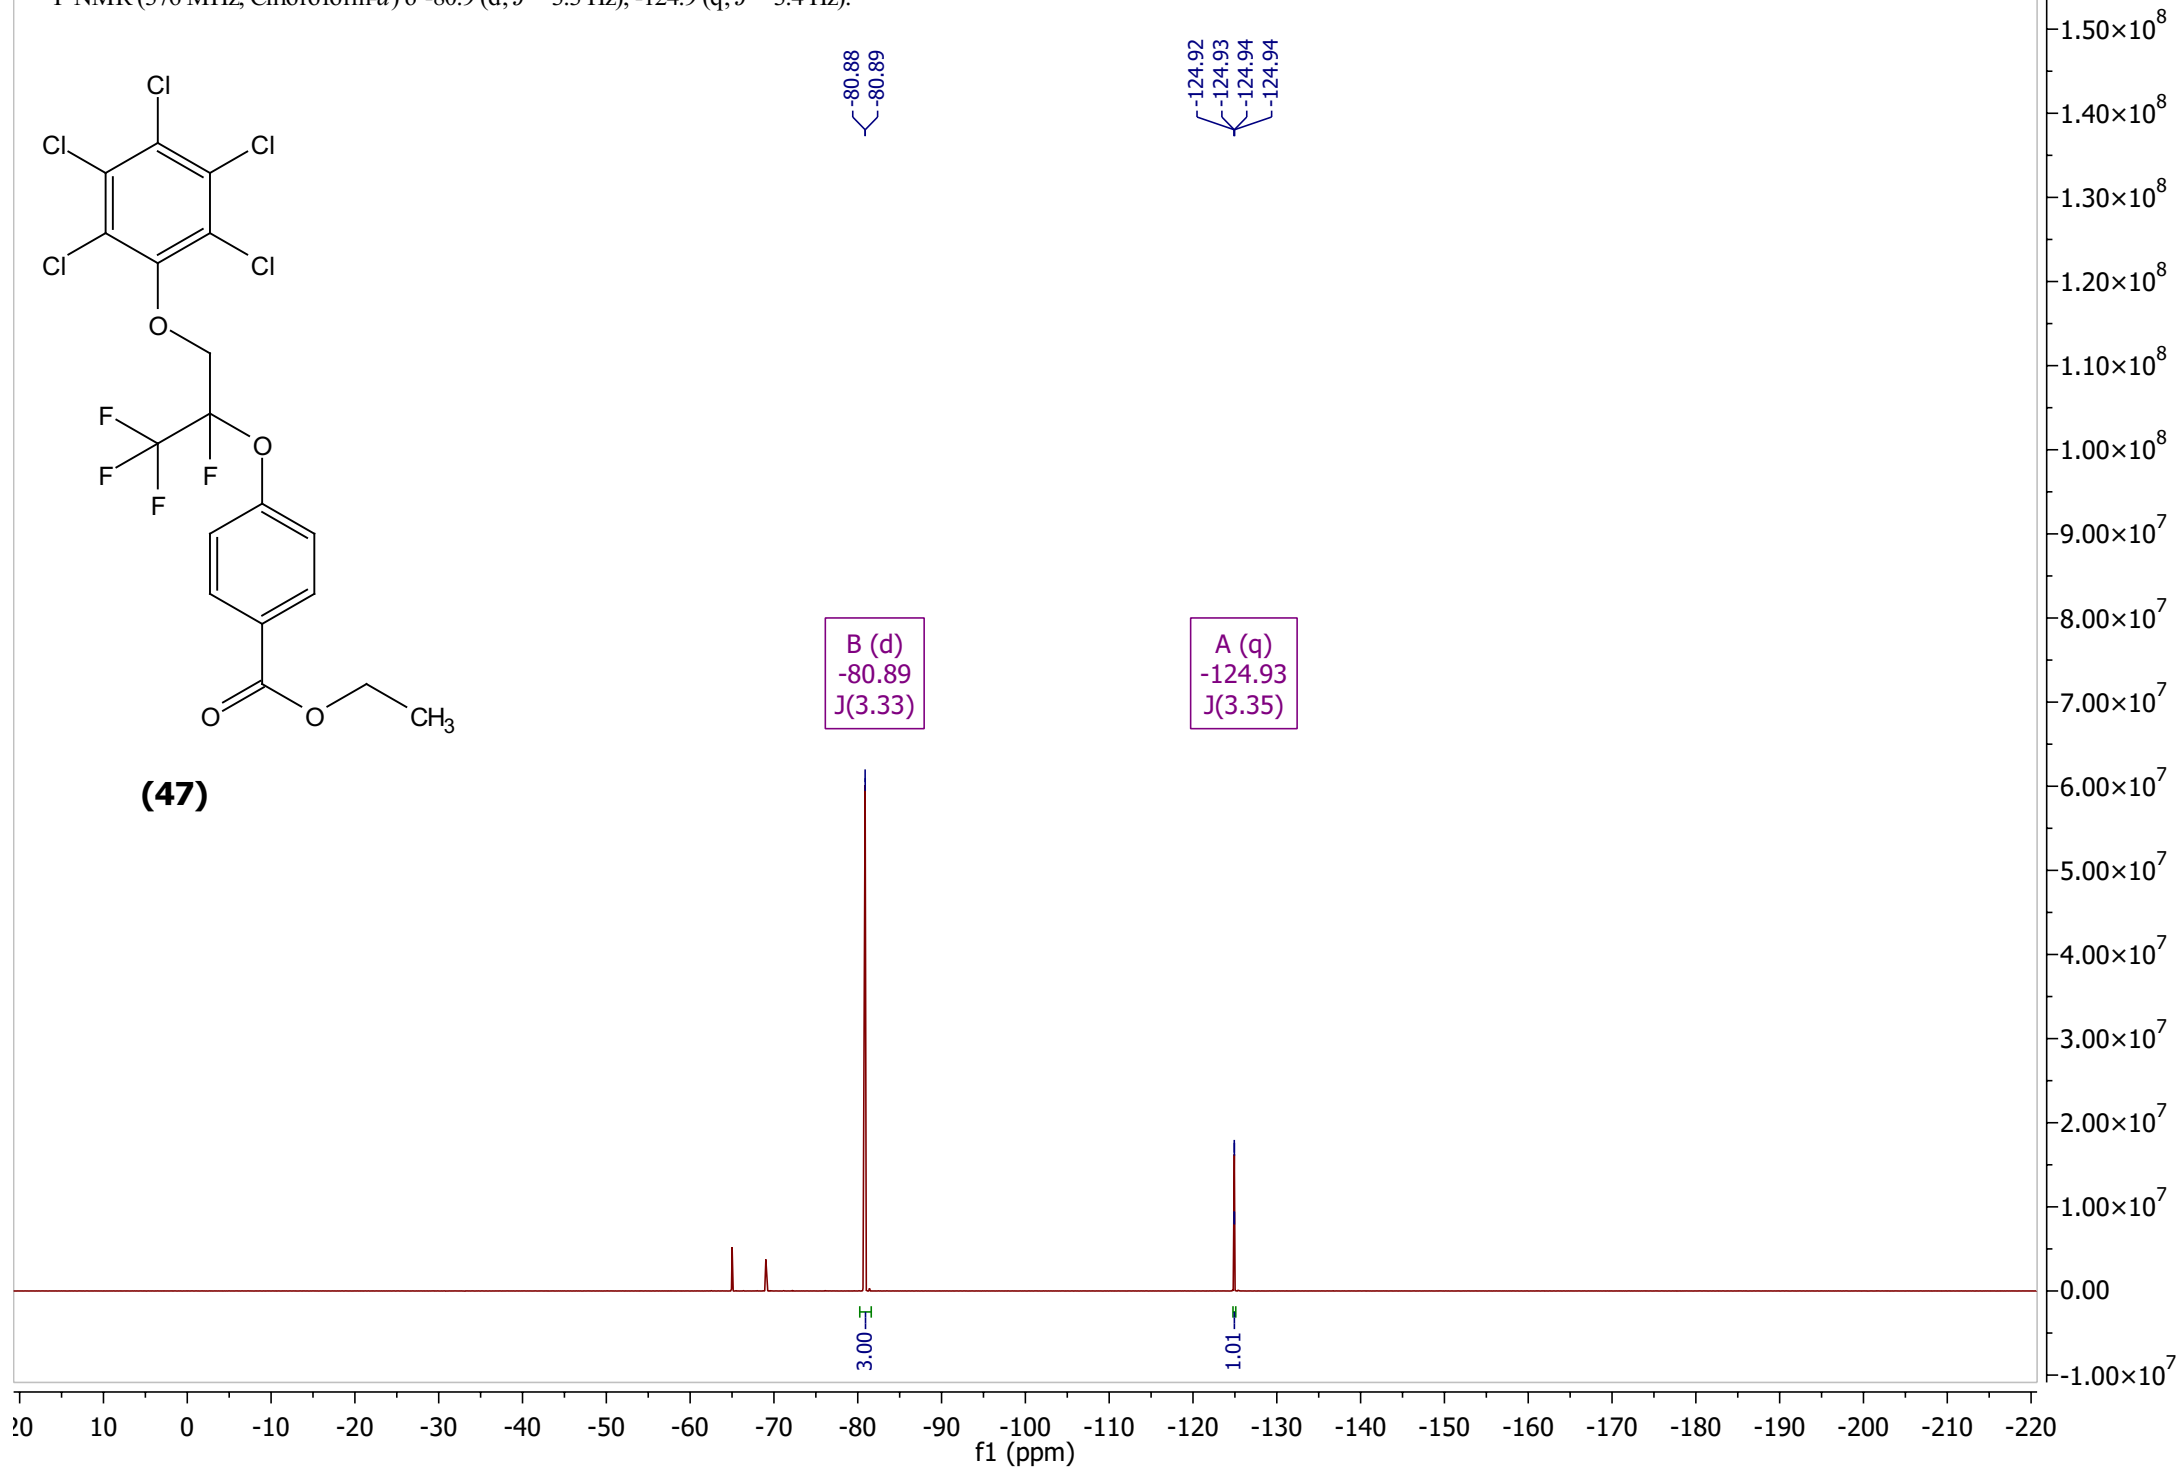



$^{13}\text{C}$  NMR (101 MHz, Chloroform-*d*)  $\delta$  165.7, 155.2 (d,  $J = 1.5$  Hz), 149.4, 132.3, 131.5, 130.8, 128.3, 128.1, 121.5 (d,  $J = 2.7$  Hz), 120.0 (qd,  $J = 286.5, 35.0$  Hz), 106.8 (dq,  $J = 238.9, 35.4$  Hz), 67.2 (d,  $J = 37.8$  Hz), 61.3, 14.4.

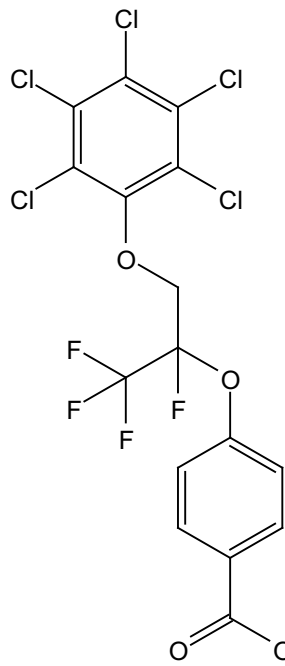

(47)

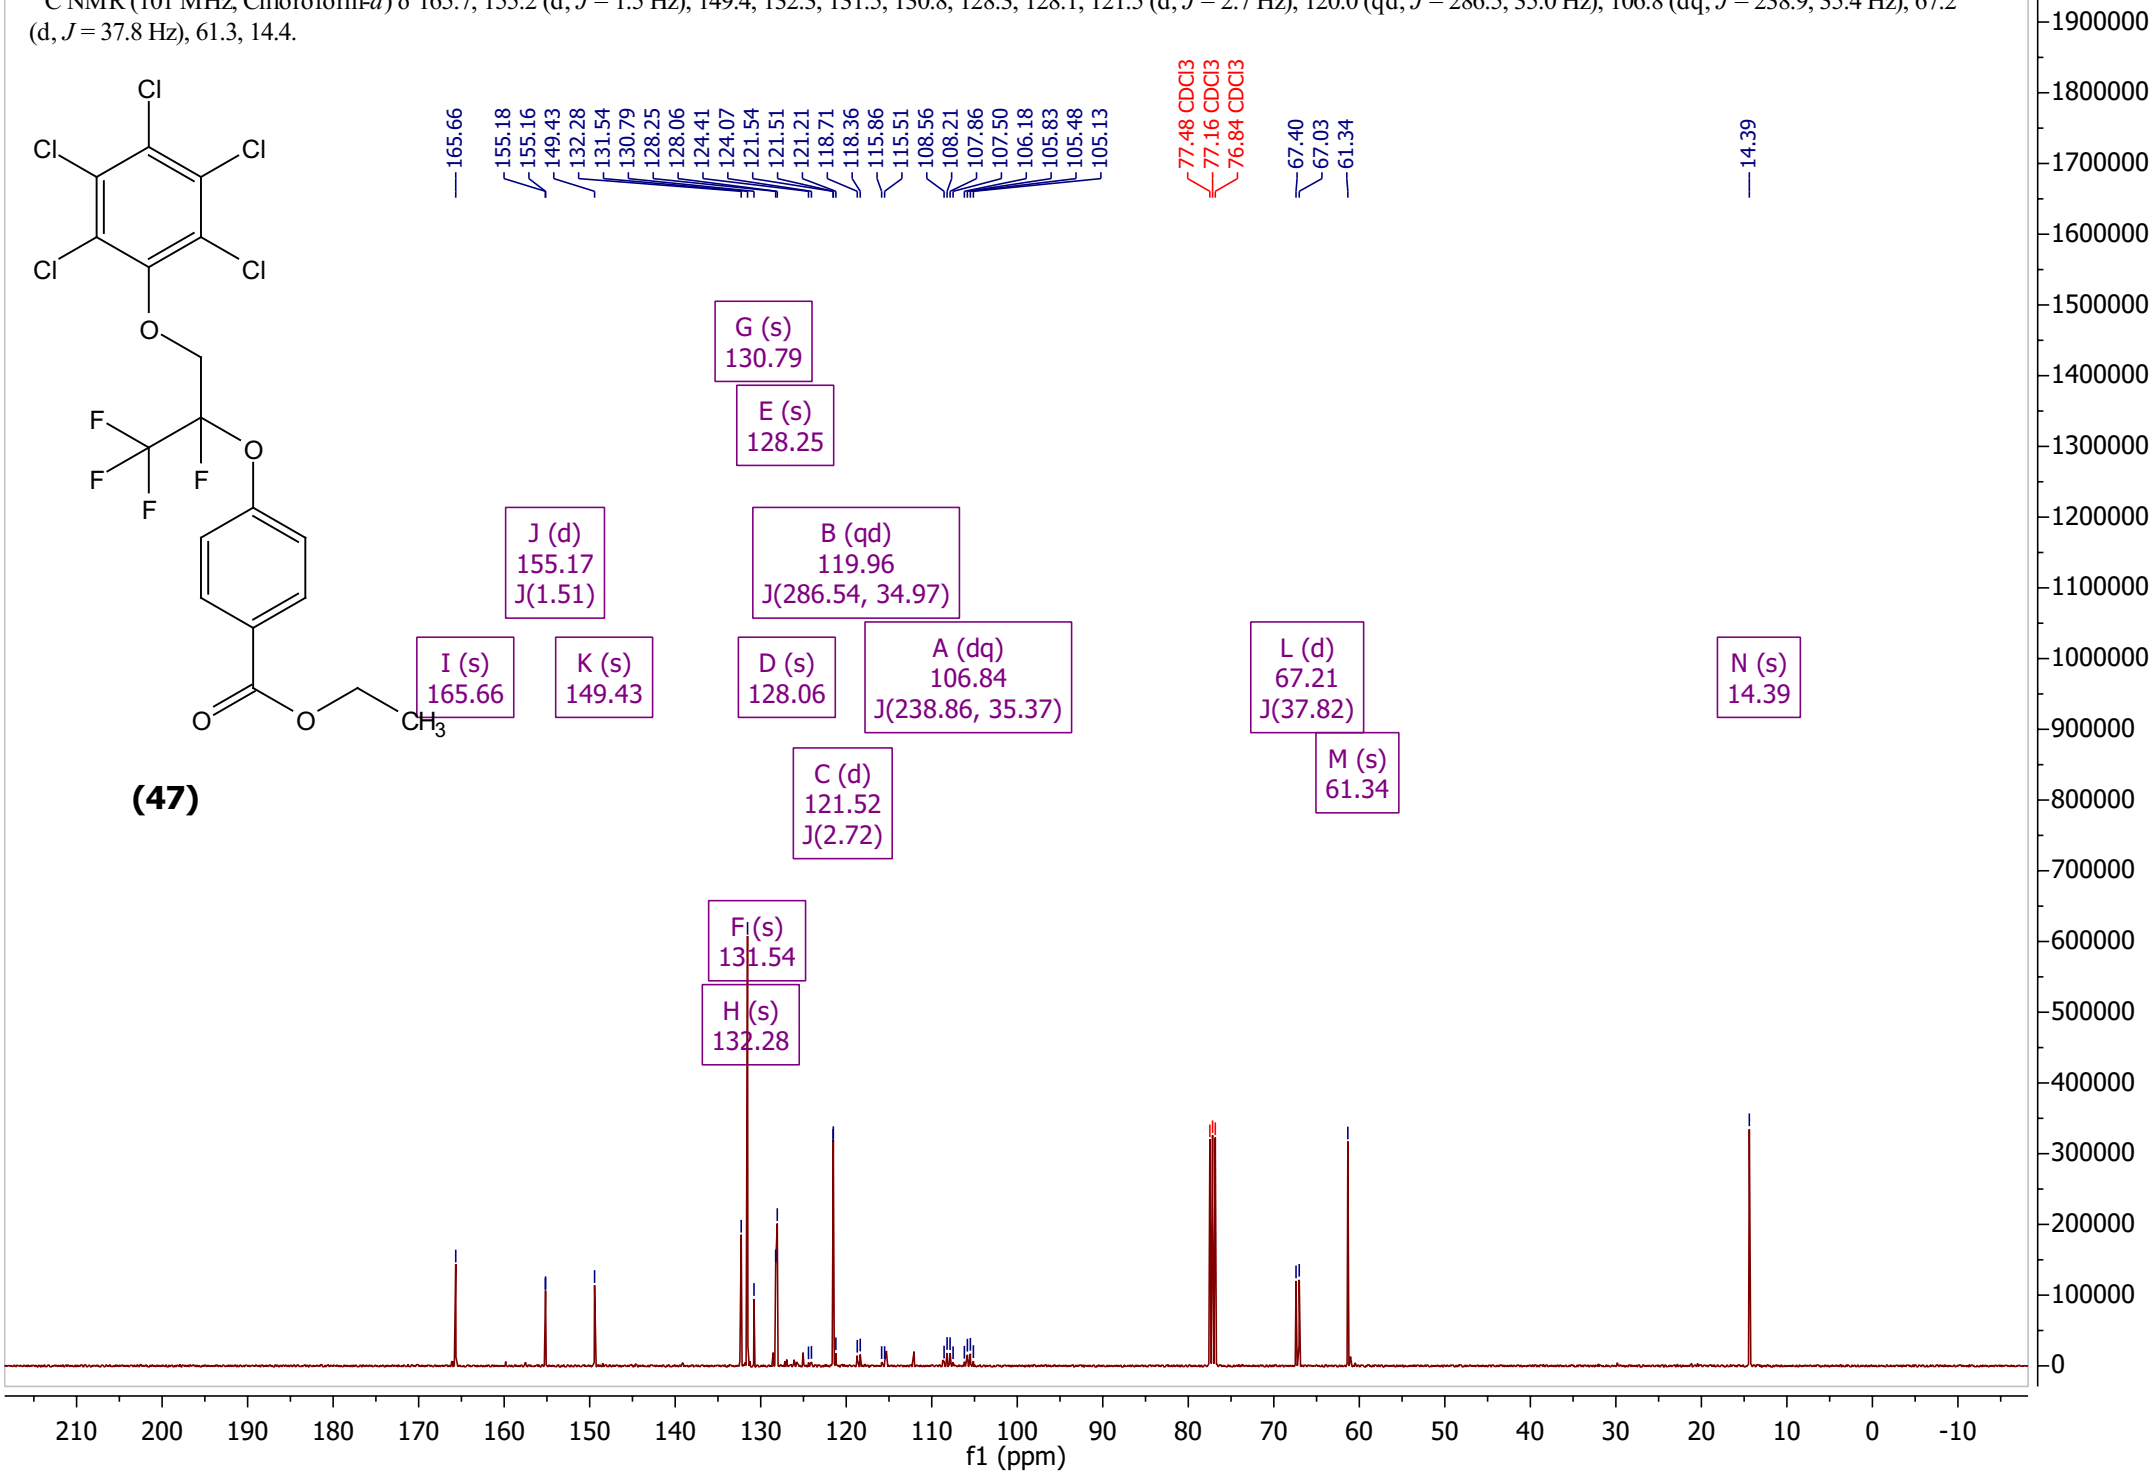

$^1\text{H}$  NMR (400 MHz, Chloroform-*d*)  $\delta$  7.28 (s, 2H), 7.17 (s, 2H), 4.40 (dd,  $J = 14.4, 10.9$  Hz, 1H), 4.30 (t,  $J = 11.0$  Hz, 1H).

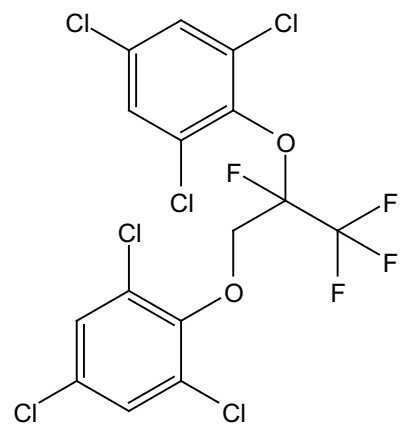

**(48)**

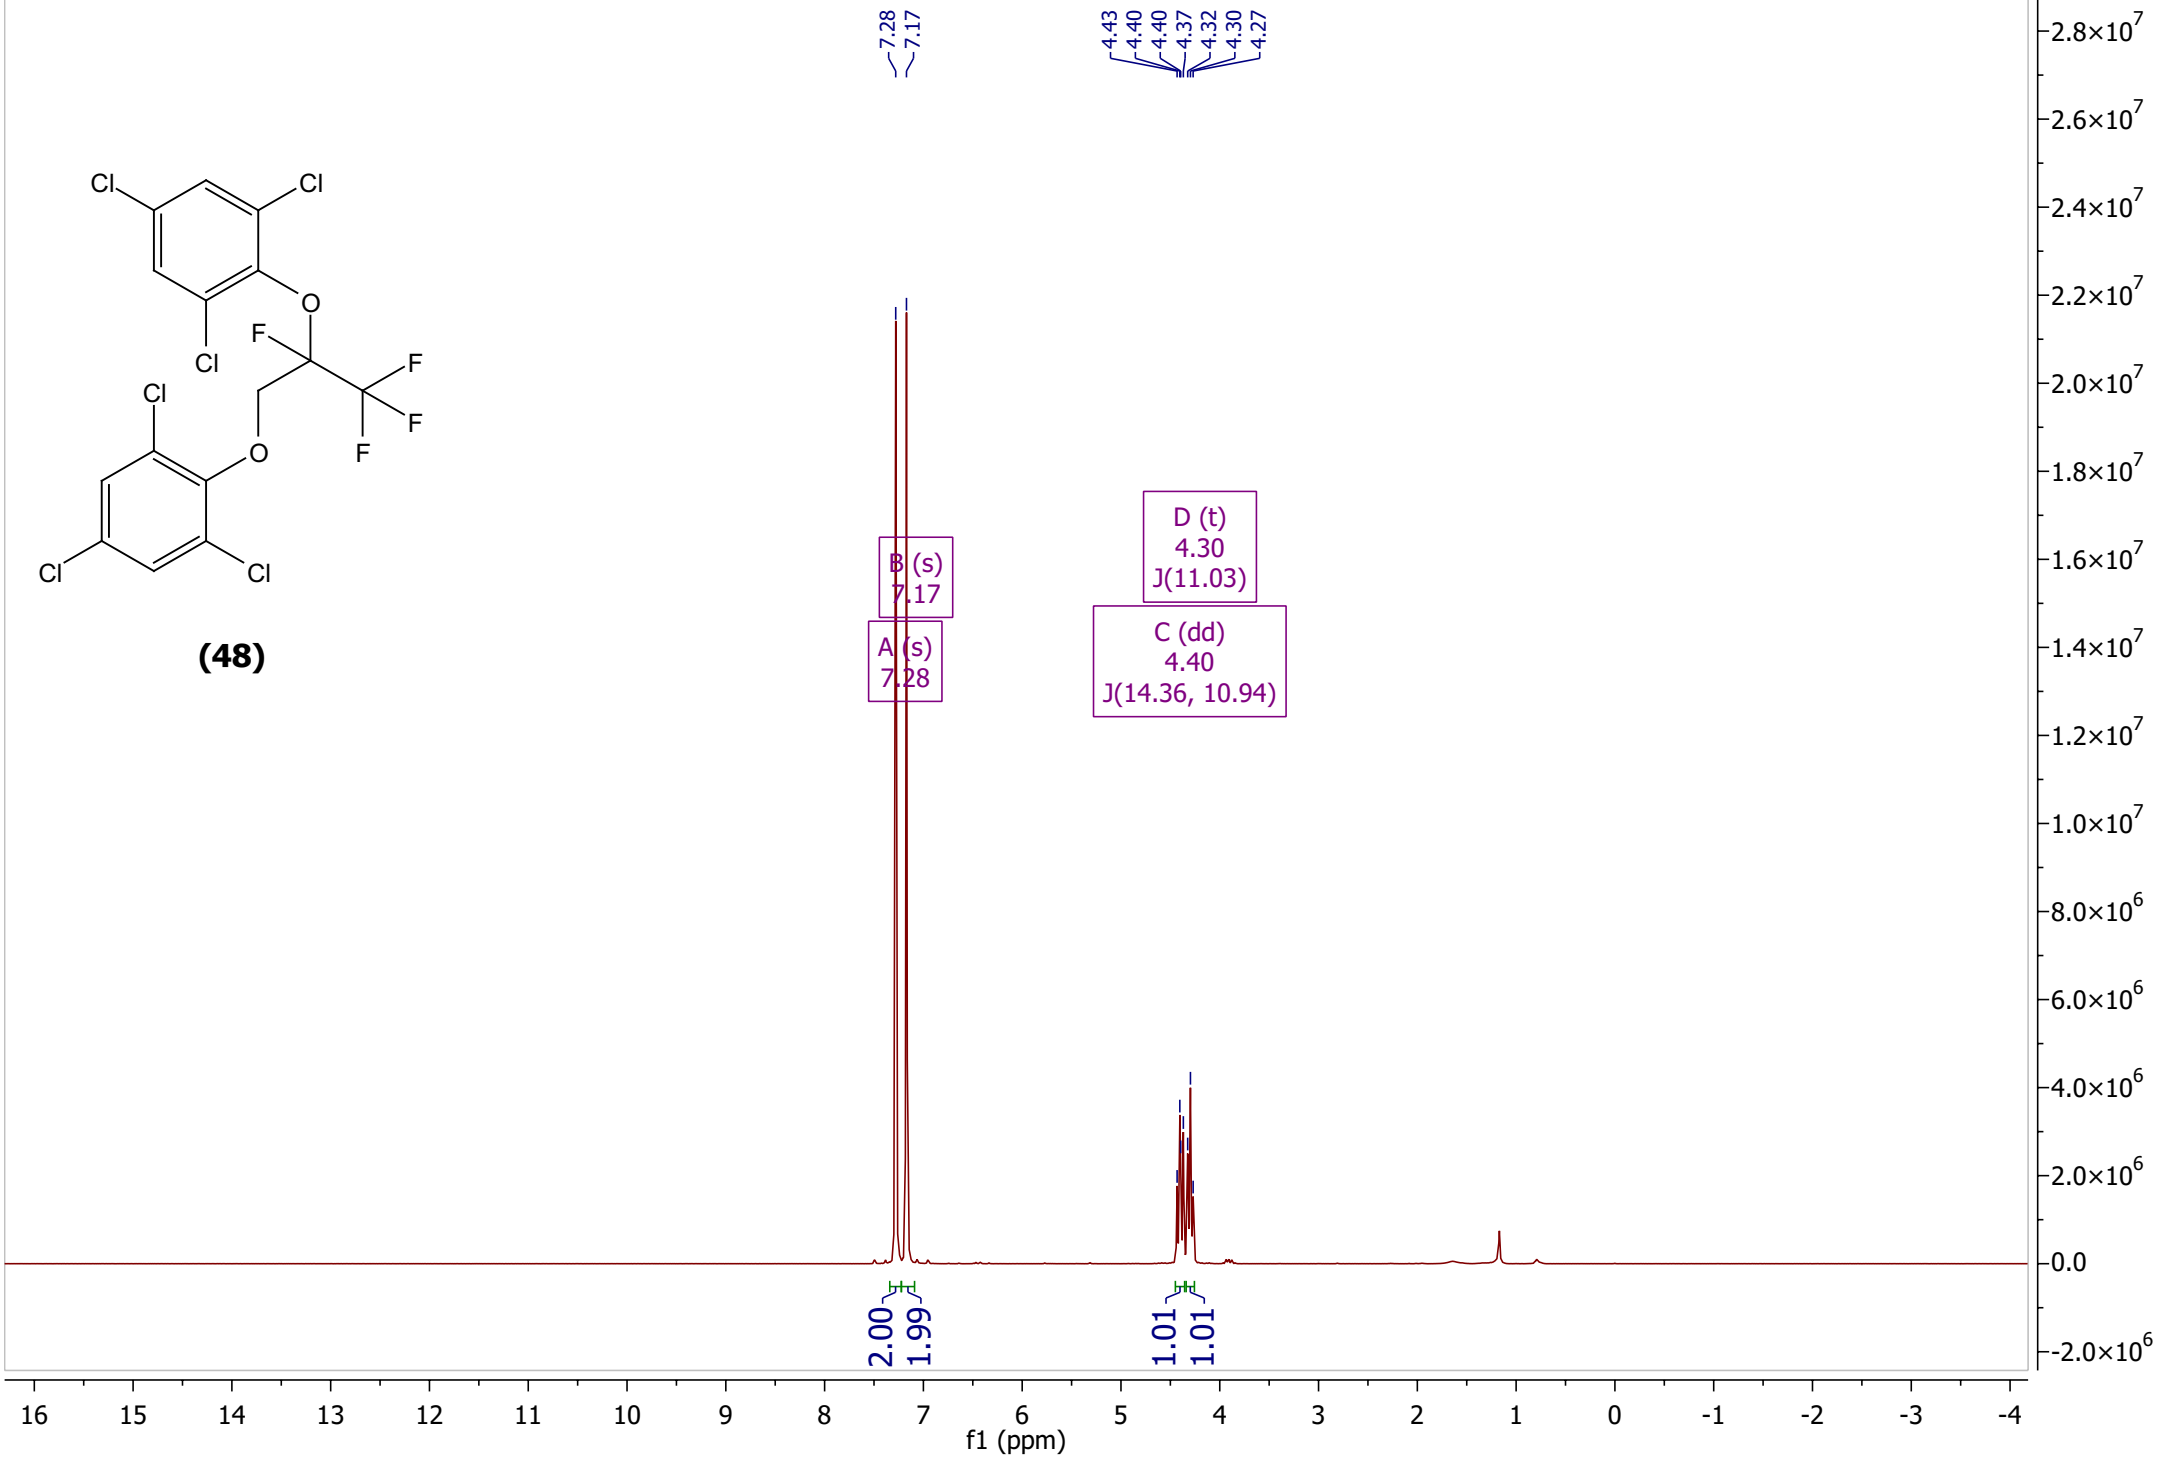

$^{19}\text{F}$  NMR (376 MHz, Chloroform-*d*)  $\delta$  -80.8, -120.2.

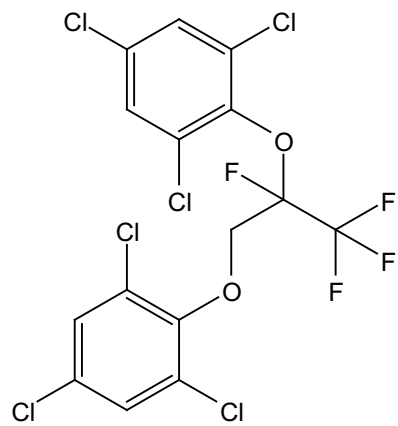

**(48)**

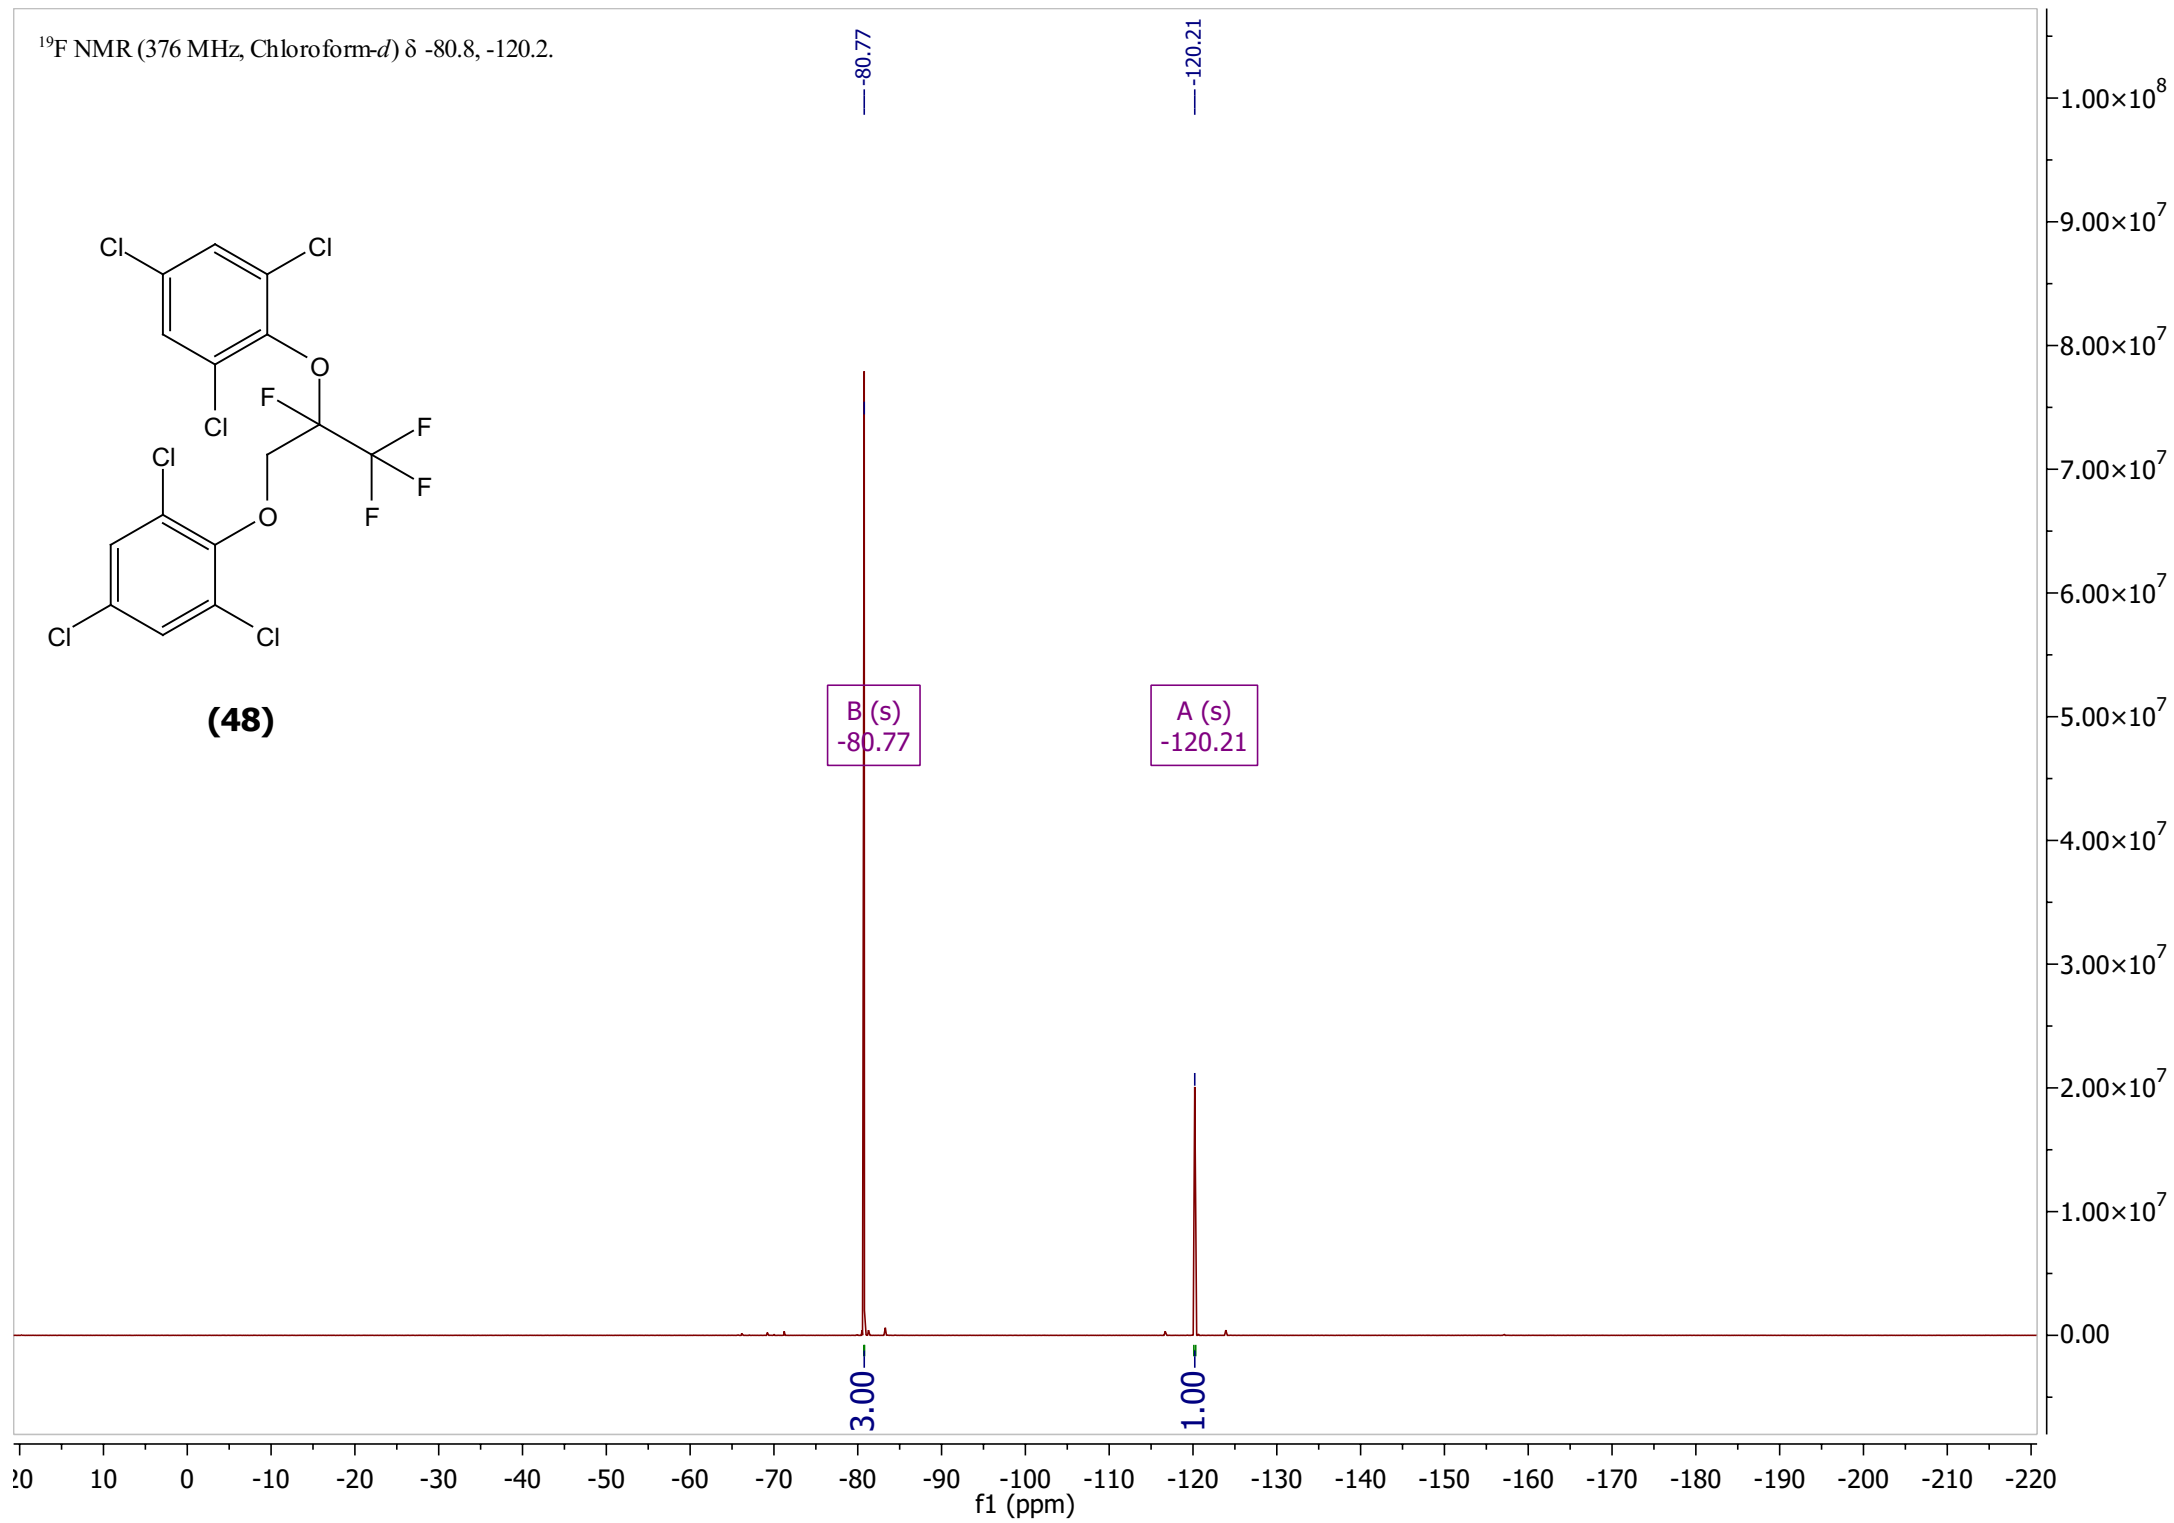

$^{13}\text{C}$  NMR (101 MHz, Chloroform-*d*)  $\delta$  148.7, 144.3, 132.4, 131.3 (d,  $J = 1.8$  Hz), 131.1, 129.9, 129.5, 129.2, 120.1 (qd,  $J = 287.3, 36.4$  Hz), 107.9 (dq,  $J = 248.8, 35.7$  Hz), 68.7 (d,  $J = 27.1$  Hz).

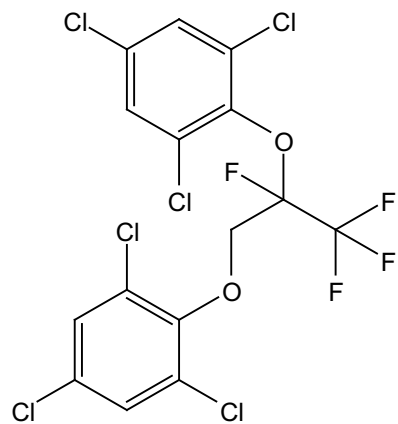

**(48)**

148.69  
144.28  
132.43  
131.26  
131.24  
131.07  
129.89  
129.48  
129.16  
124.57  
124.21  
121.72  
121.36  
118.86  
118.50  
116.01  
115.65  
109.67  
109.31  
108.96  
108.60  
107.19  
106.84  
106.48  
106.13

77.48 CDCl<sub>3</sub>  
77.16 CDCl<sub>3</sub>  
76.84 CDCl<sub>3</sub>

68.83  
68.56

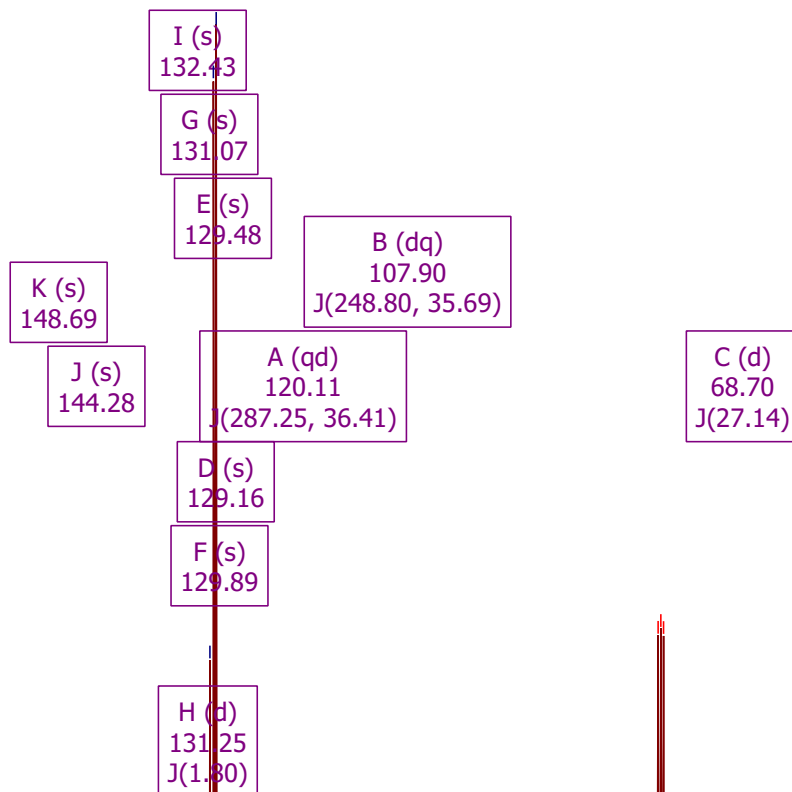

210 200 190 180 170 160 150 140 130 120 110 100 90 80 70 60 50 40 30 20 10 0 -10  
f1 (ppm)

$^1\text{H}$  NMR (400 MHz, Chloroform-*d*)  $\delta$  8.13 (s, 1H), 8.05 (s, 1H), 7.90 (d,  $J = 7.8$  Hz, 1H), 7.82 (d,  $J = 7.7$  Hz, 1H), 7.68 (d,  $J = 8.4$  Hz, 1H), 7.21 (d,  $J = 8.8$  Hz, 1H), 4.84 (dd,  $J = 15.7, 11.4$  Hz, 1H), 4.71 (dd,  $J = 11.3, 7.9$  Hz, 1H).

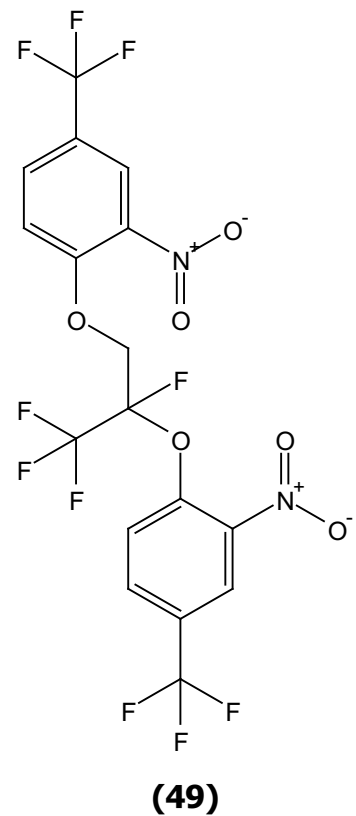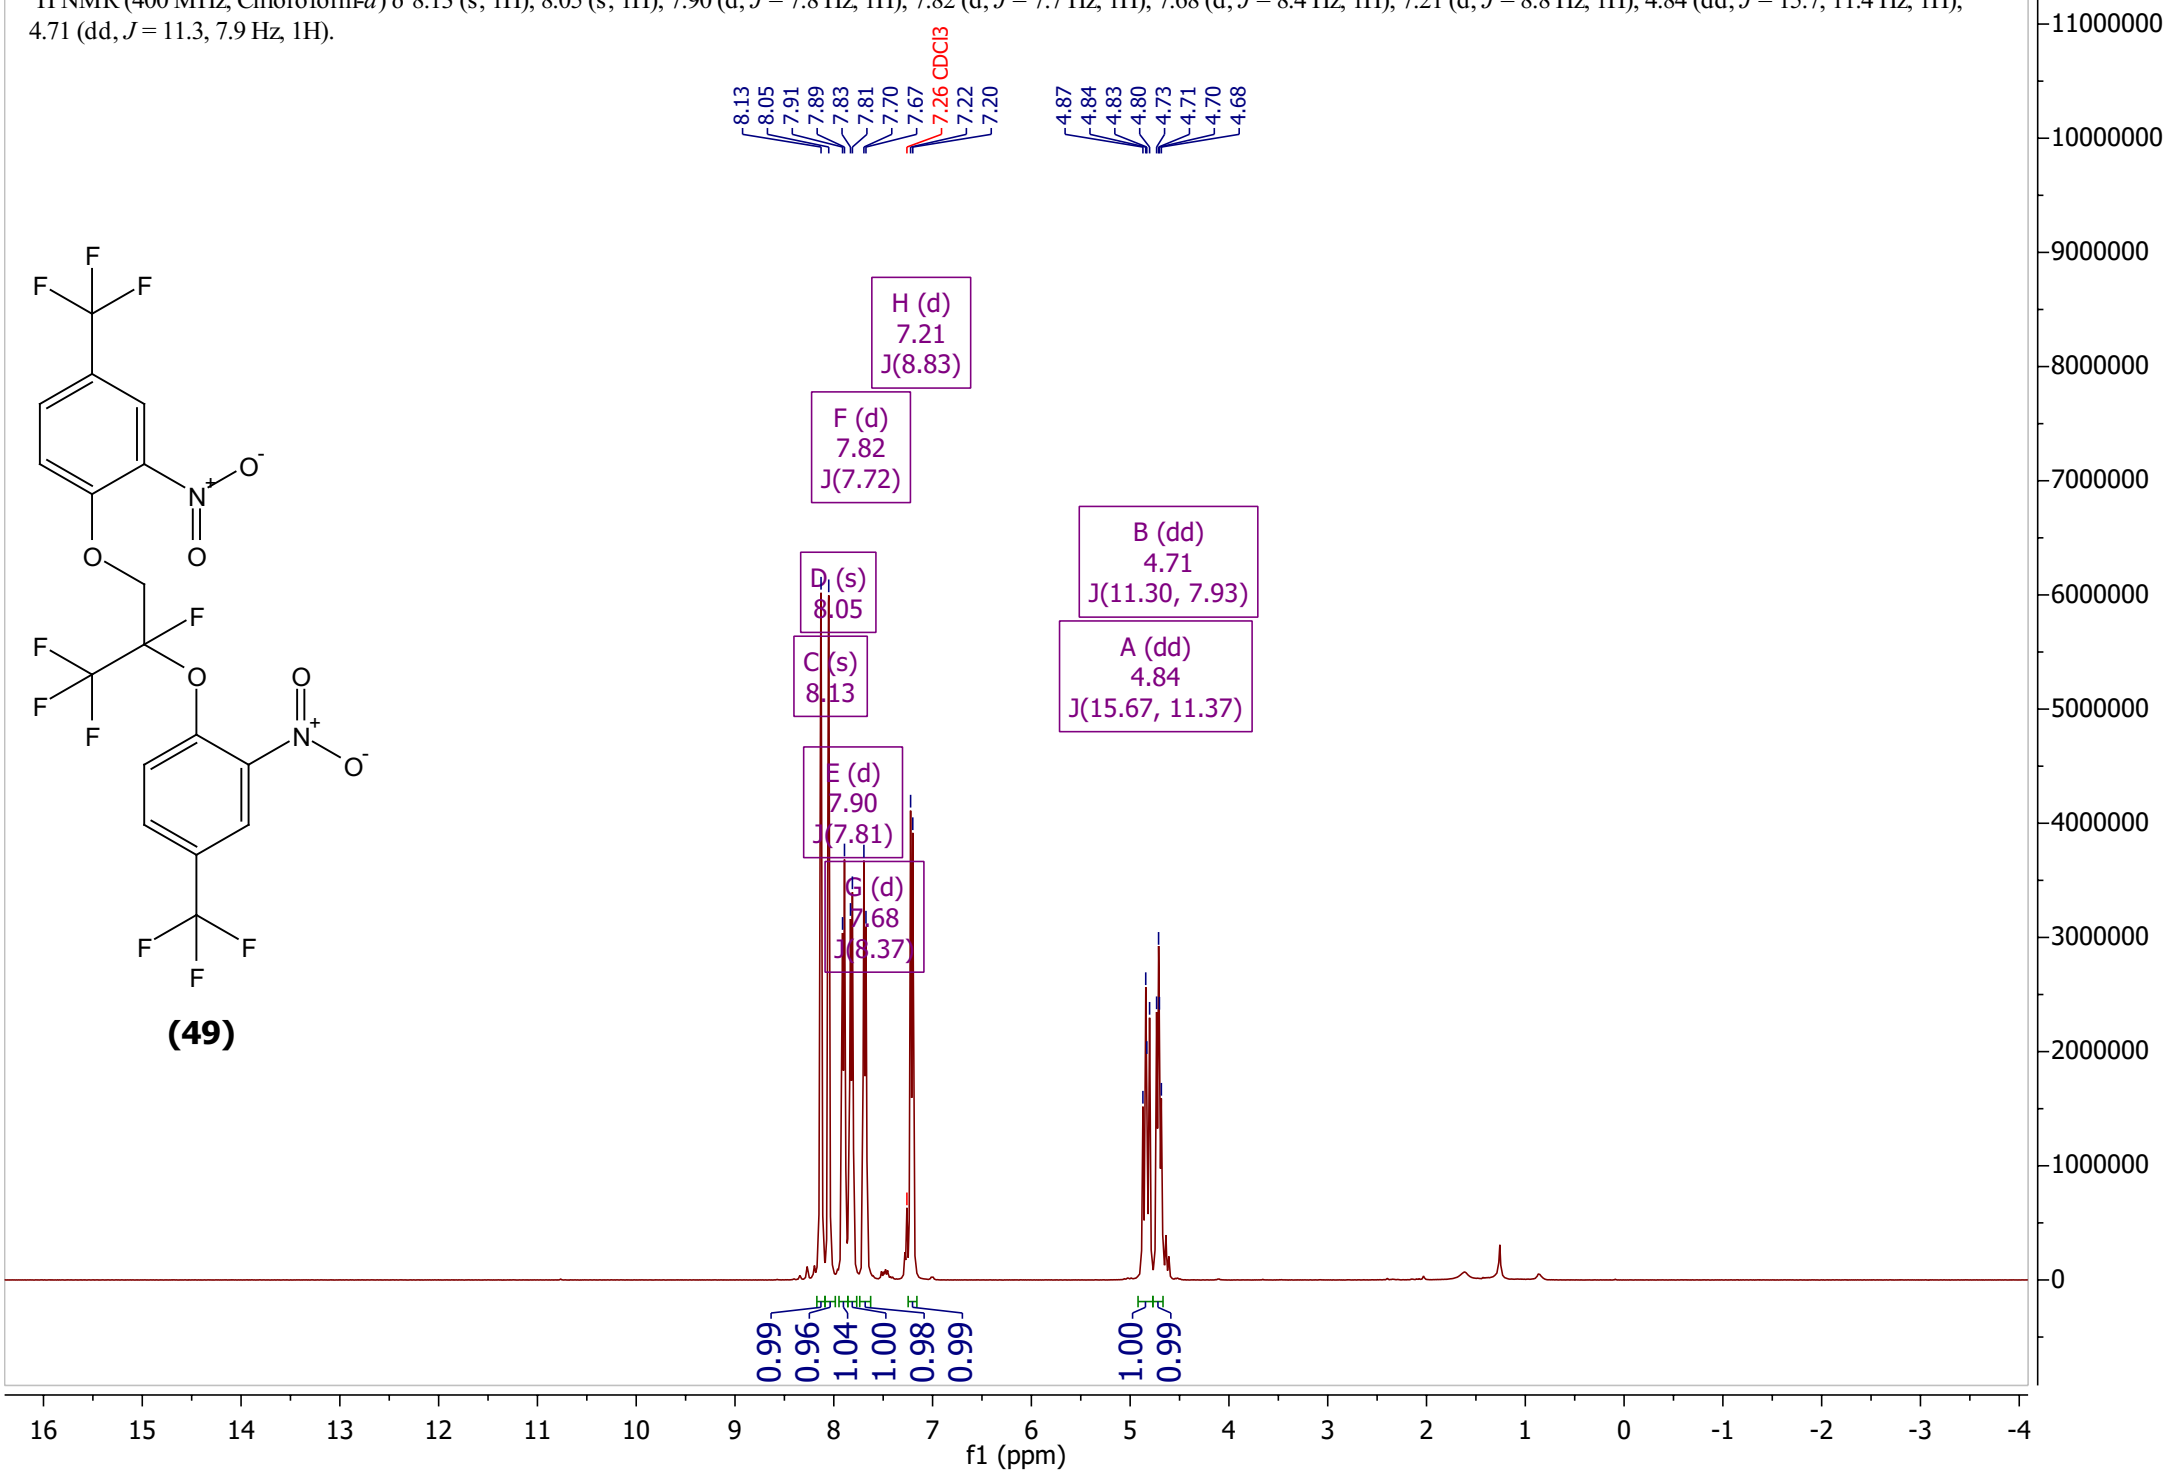

$^{19}\text{F}$  NMR (376 MHz, Chloroform-*d*)  $\delta$  -62.5, -63.0, -81.5 (d,  $J=2.8$  Hz), -128.2 (q,  $J=2.8$  Hz).

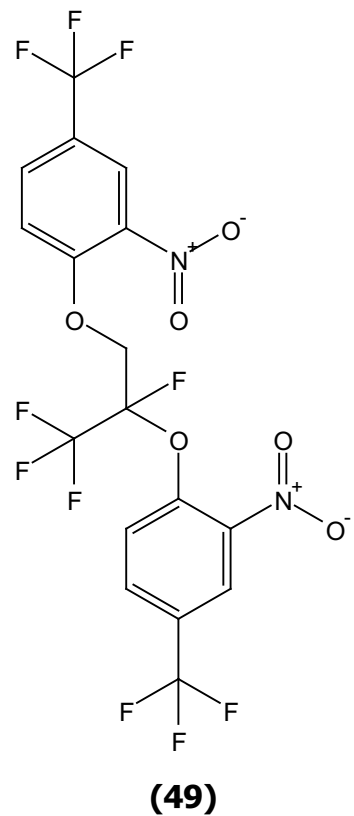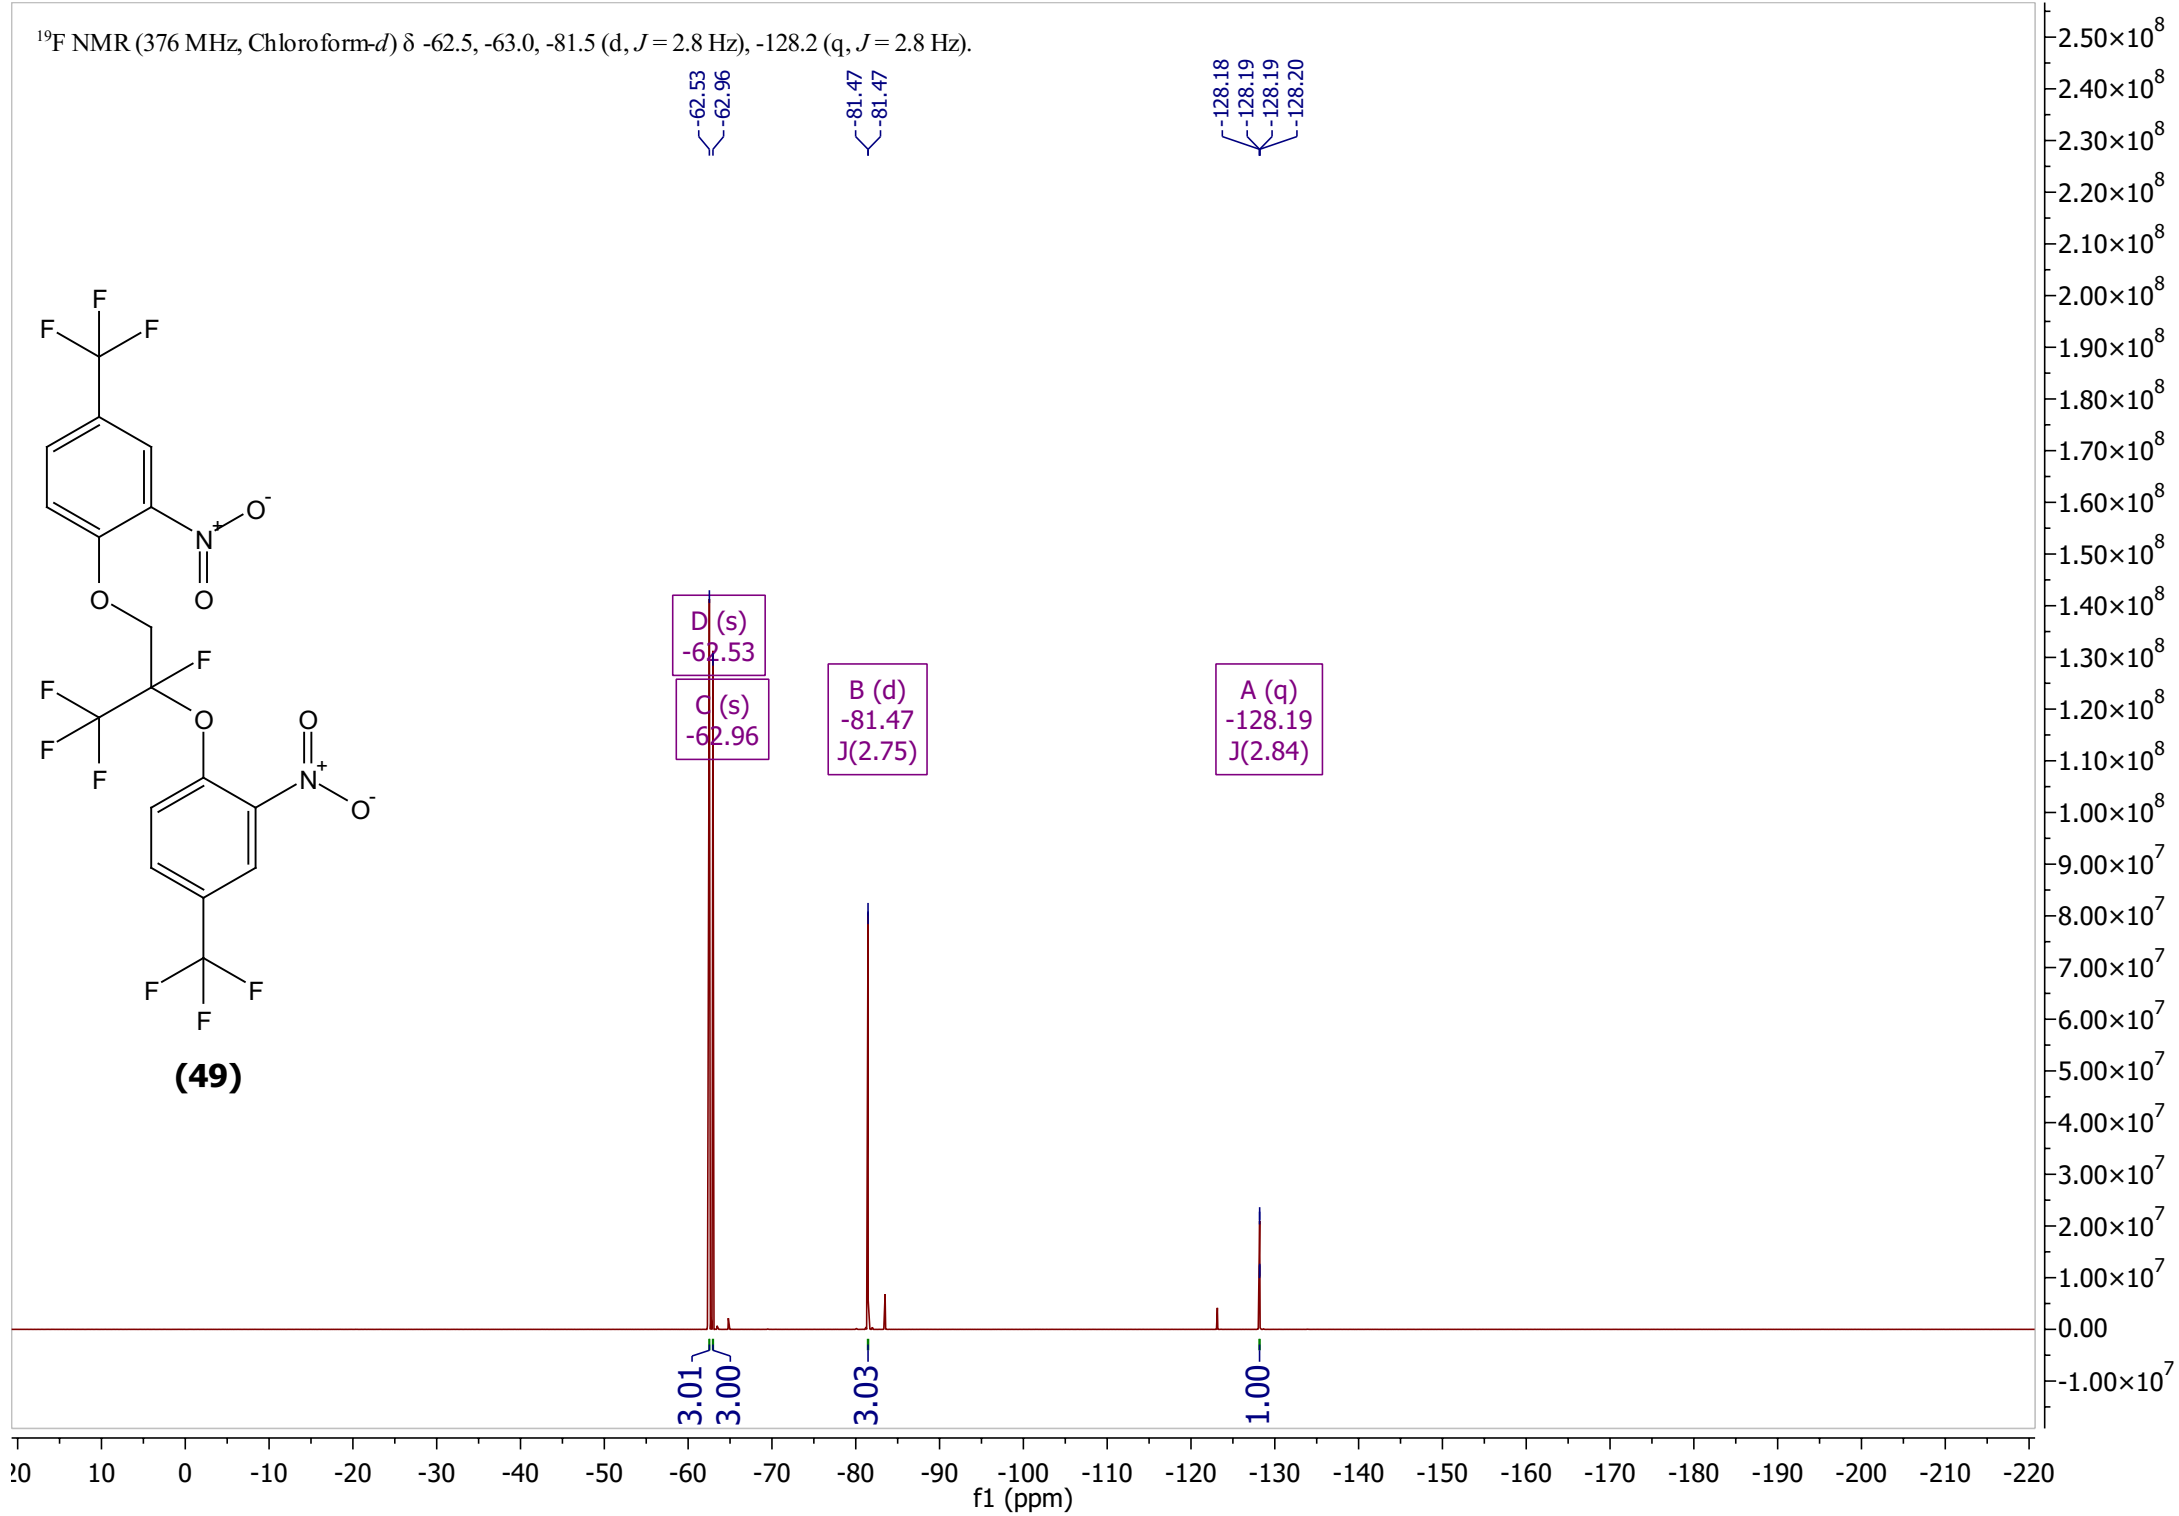

<sup>13</sup>C NMR (101 MHz, Chloroform-*d*) δ 152.3, 146.7, 142.9, 139.9, 131.3 (q, *J* = 3.5 Hz), 129.4 (q, *J* = 34.9 Hz), 125.7, 125.6, 125.4 (q, *J* = 34.8 Hz), 123.7 (q, *J* = 3.8 Hz), 123.4 (q, *J* = 3.8 Hz), 122.8 (q, *J* = 272.1 Hz), 122.5 (q, *J* = 272.8 Hz), 119.5 (qd, *J* = 287.2, 33.4 Hz), 115.3, 107.7 (dq, *J* = 248.8, 35.5 Hz), 66.8 (d, *J* = 27.9 Hz).

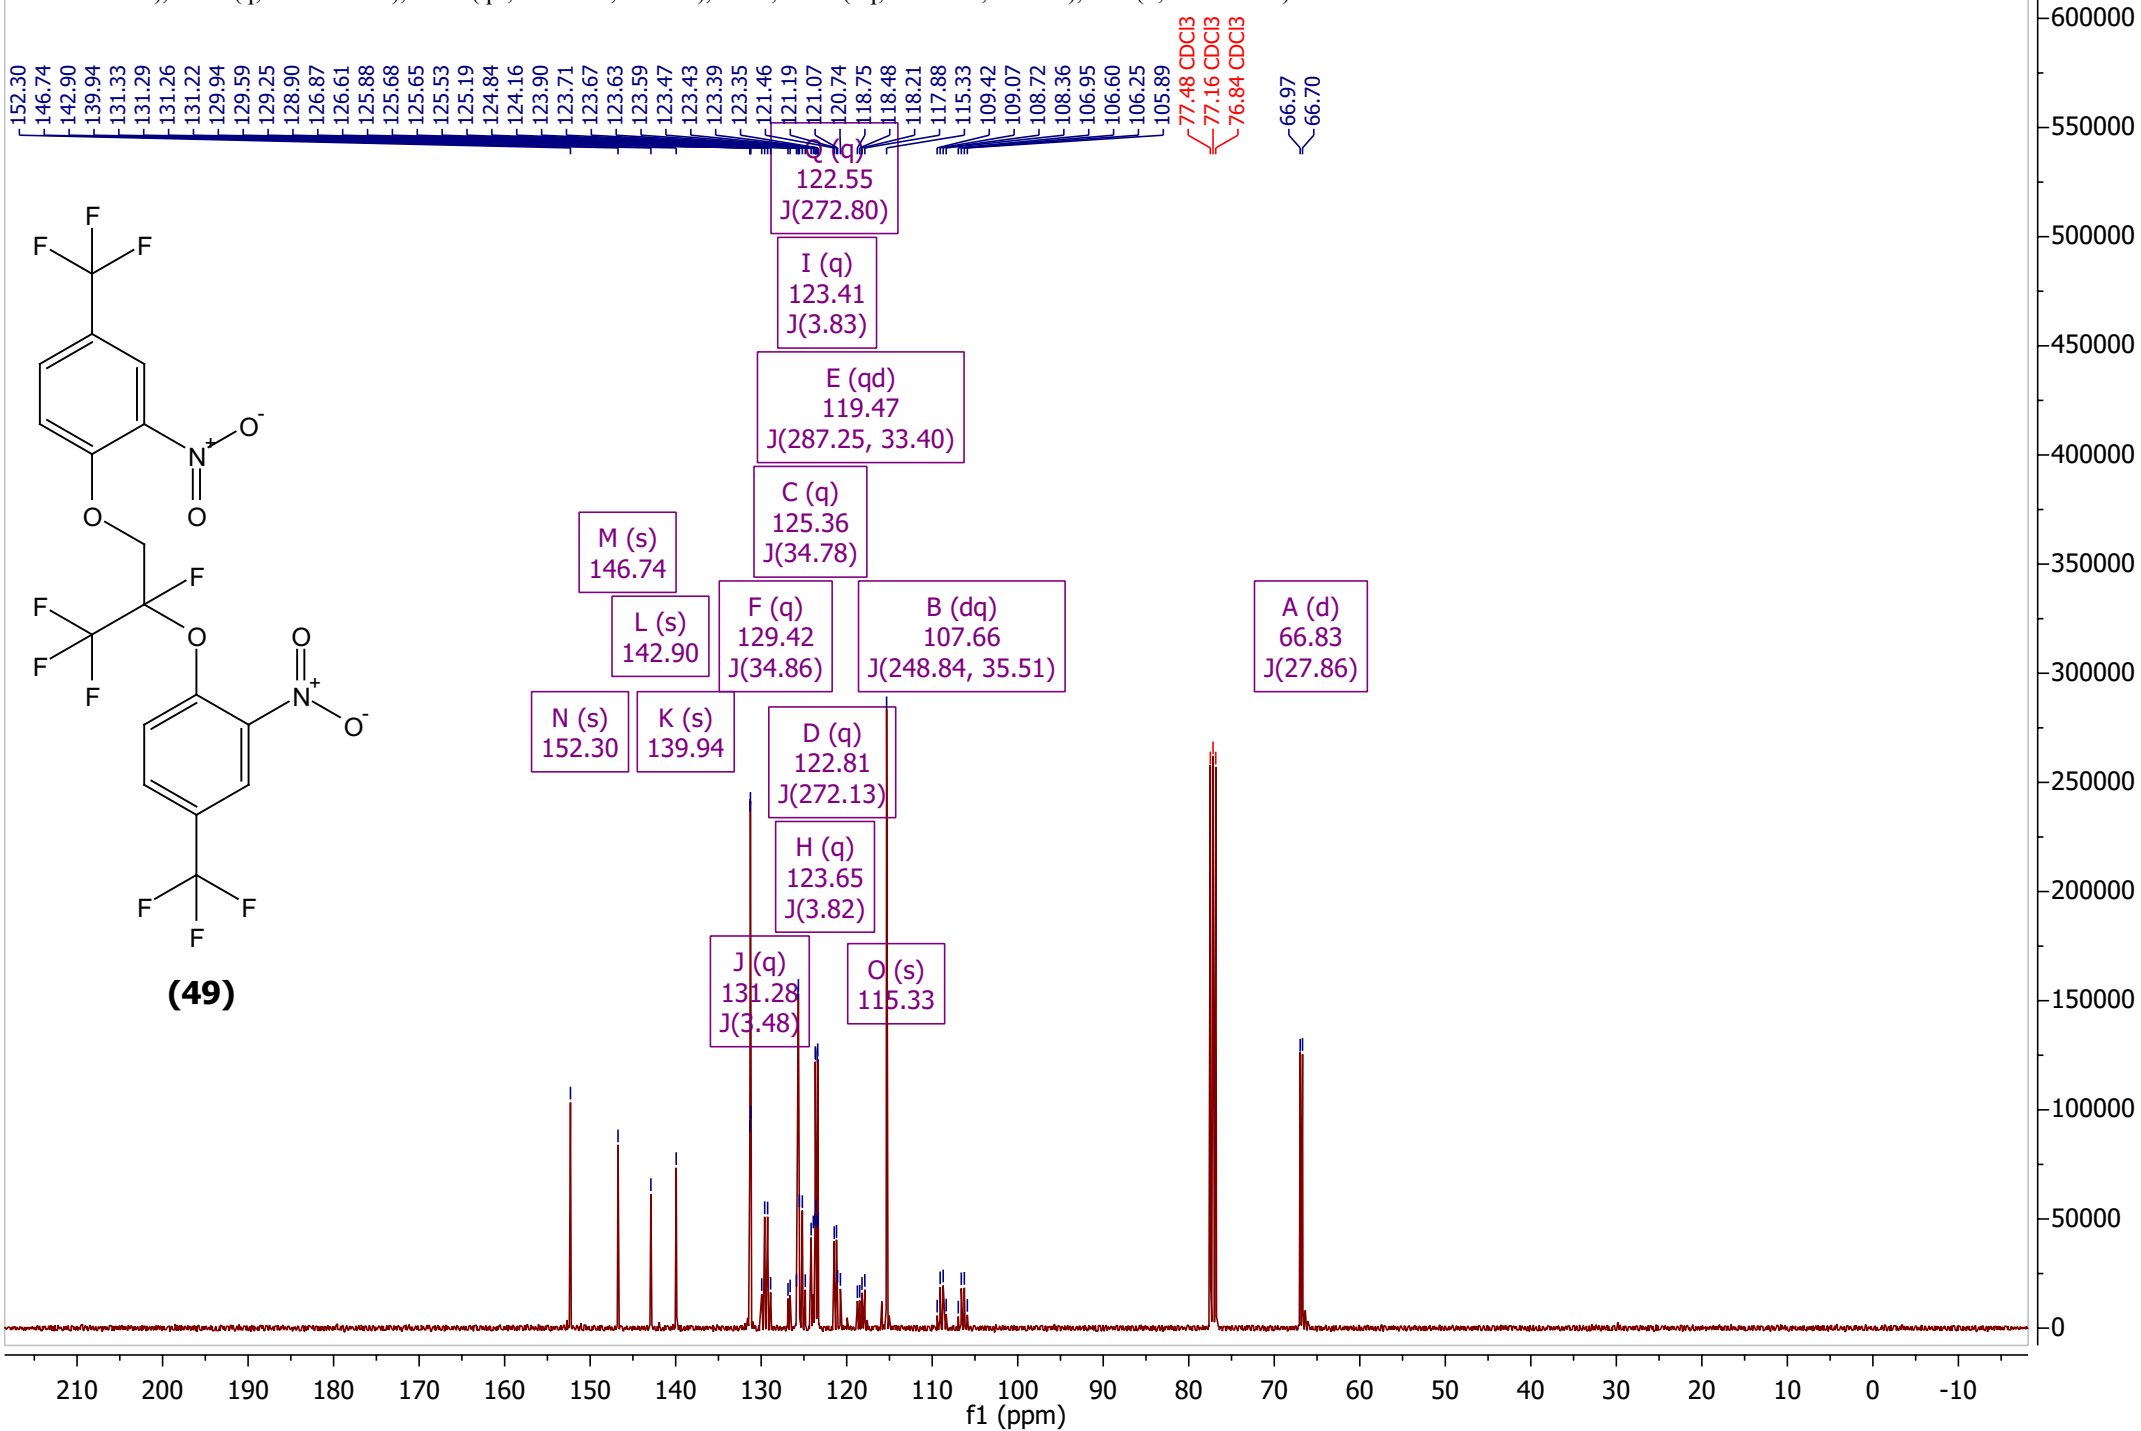

$^1\text{H}$  NMR (400 MHz,  $\text{DMSO-}d_6$ )  $\delta$  8.54 (s, 1H), 7.78 (d,  $J = 7.6$  Hz, 1H), 7.56 (t,  $J = 7.9$  Hz, 1H), 7.41 (dd,  $J = 8.3, 2.7$  Hz, 1H), 7.02 (d,  $J = 8.0$  Hz, 1H), 6.86 (t,  $J = 7.7$  Hz, 1H), 6.68 – 6.57 (m, 2H), 5.42 (t,  $J = 6.9$  Hz, 1H), 4.70 – 4.52 (m, 2H), 4.45 (dt,  $J = 11.8, 3.6$  Hz, 1H), 4.18 – 4.02 (m, 2H), 3.80 (td,  $J = 16.4, 6.8$  Hz, 1H).

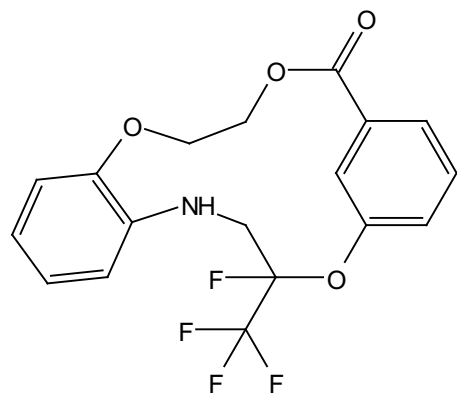

**(50)**

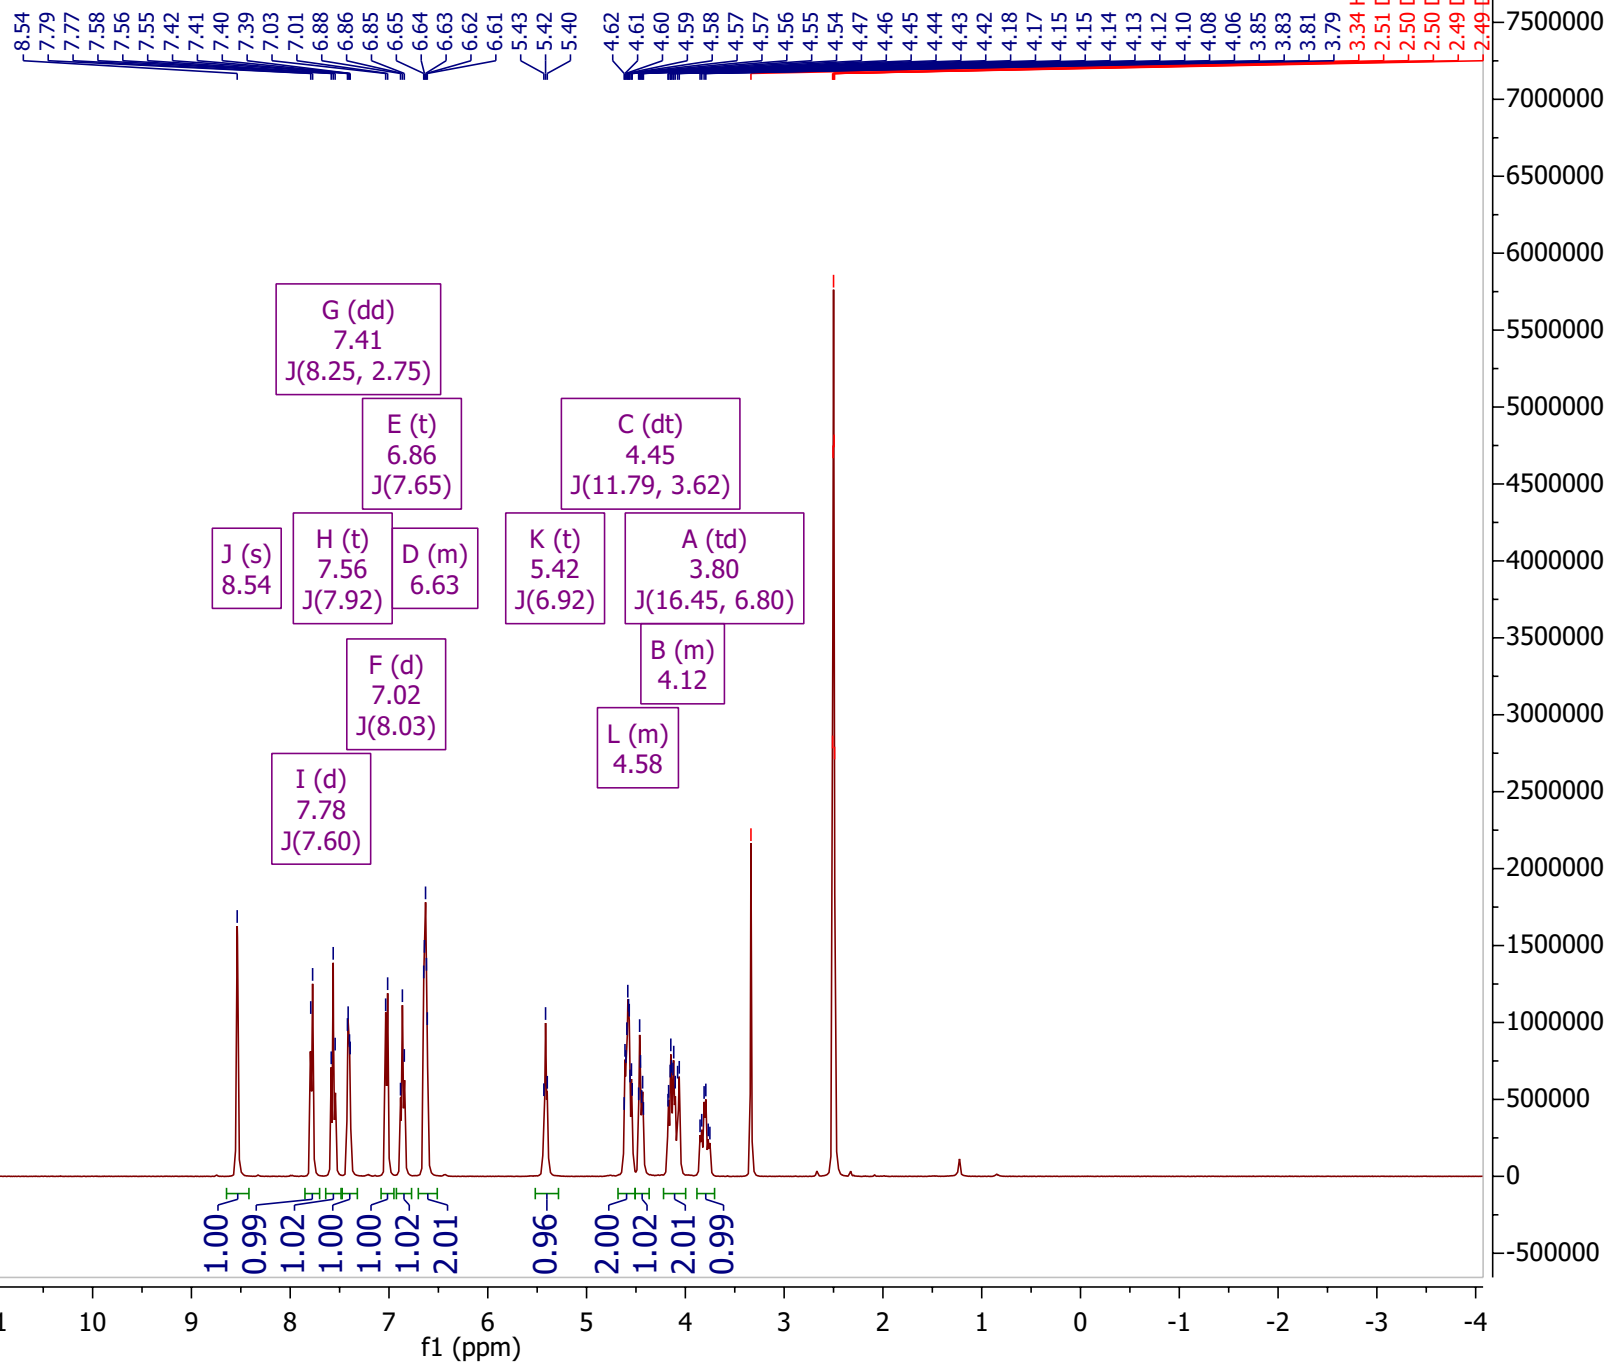



$^{19}\text{F}$  NMR (376 MHz,  $\text{DMSO-}d_6$ )  $\delta$  -83.8 (d,  $J = 4.2$  Hz), -125.6 (q,  $J = 4.3$  Hz).

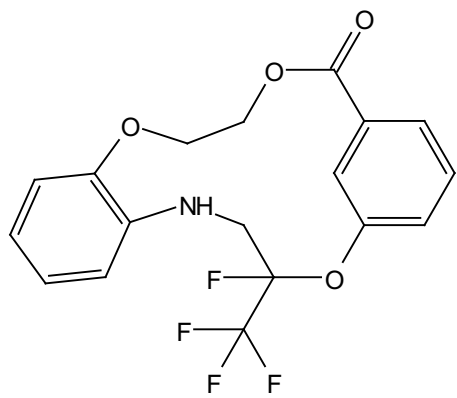

**(50)**

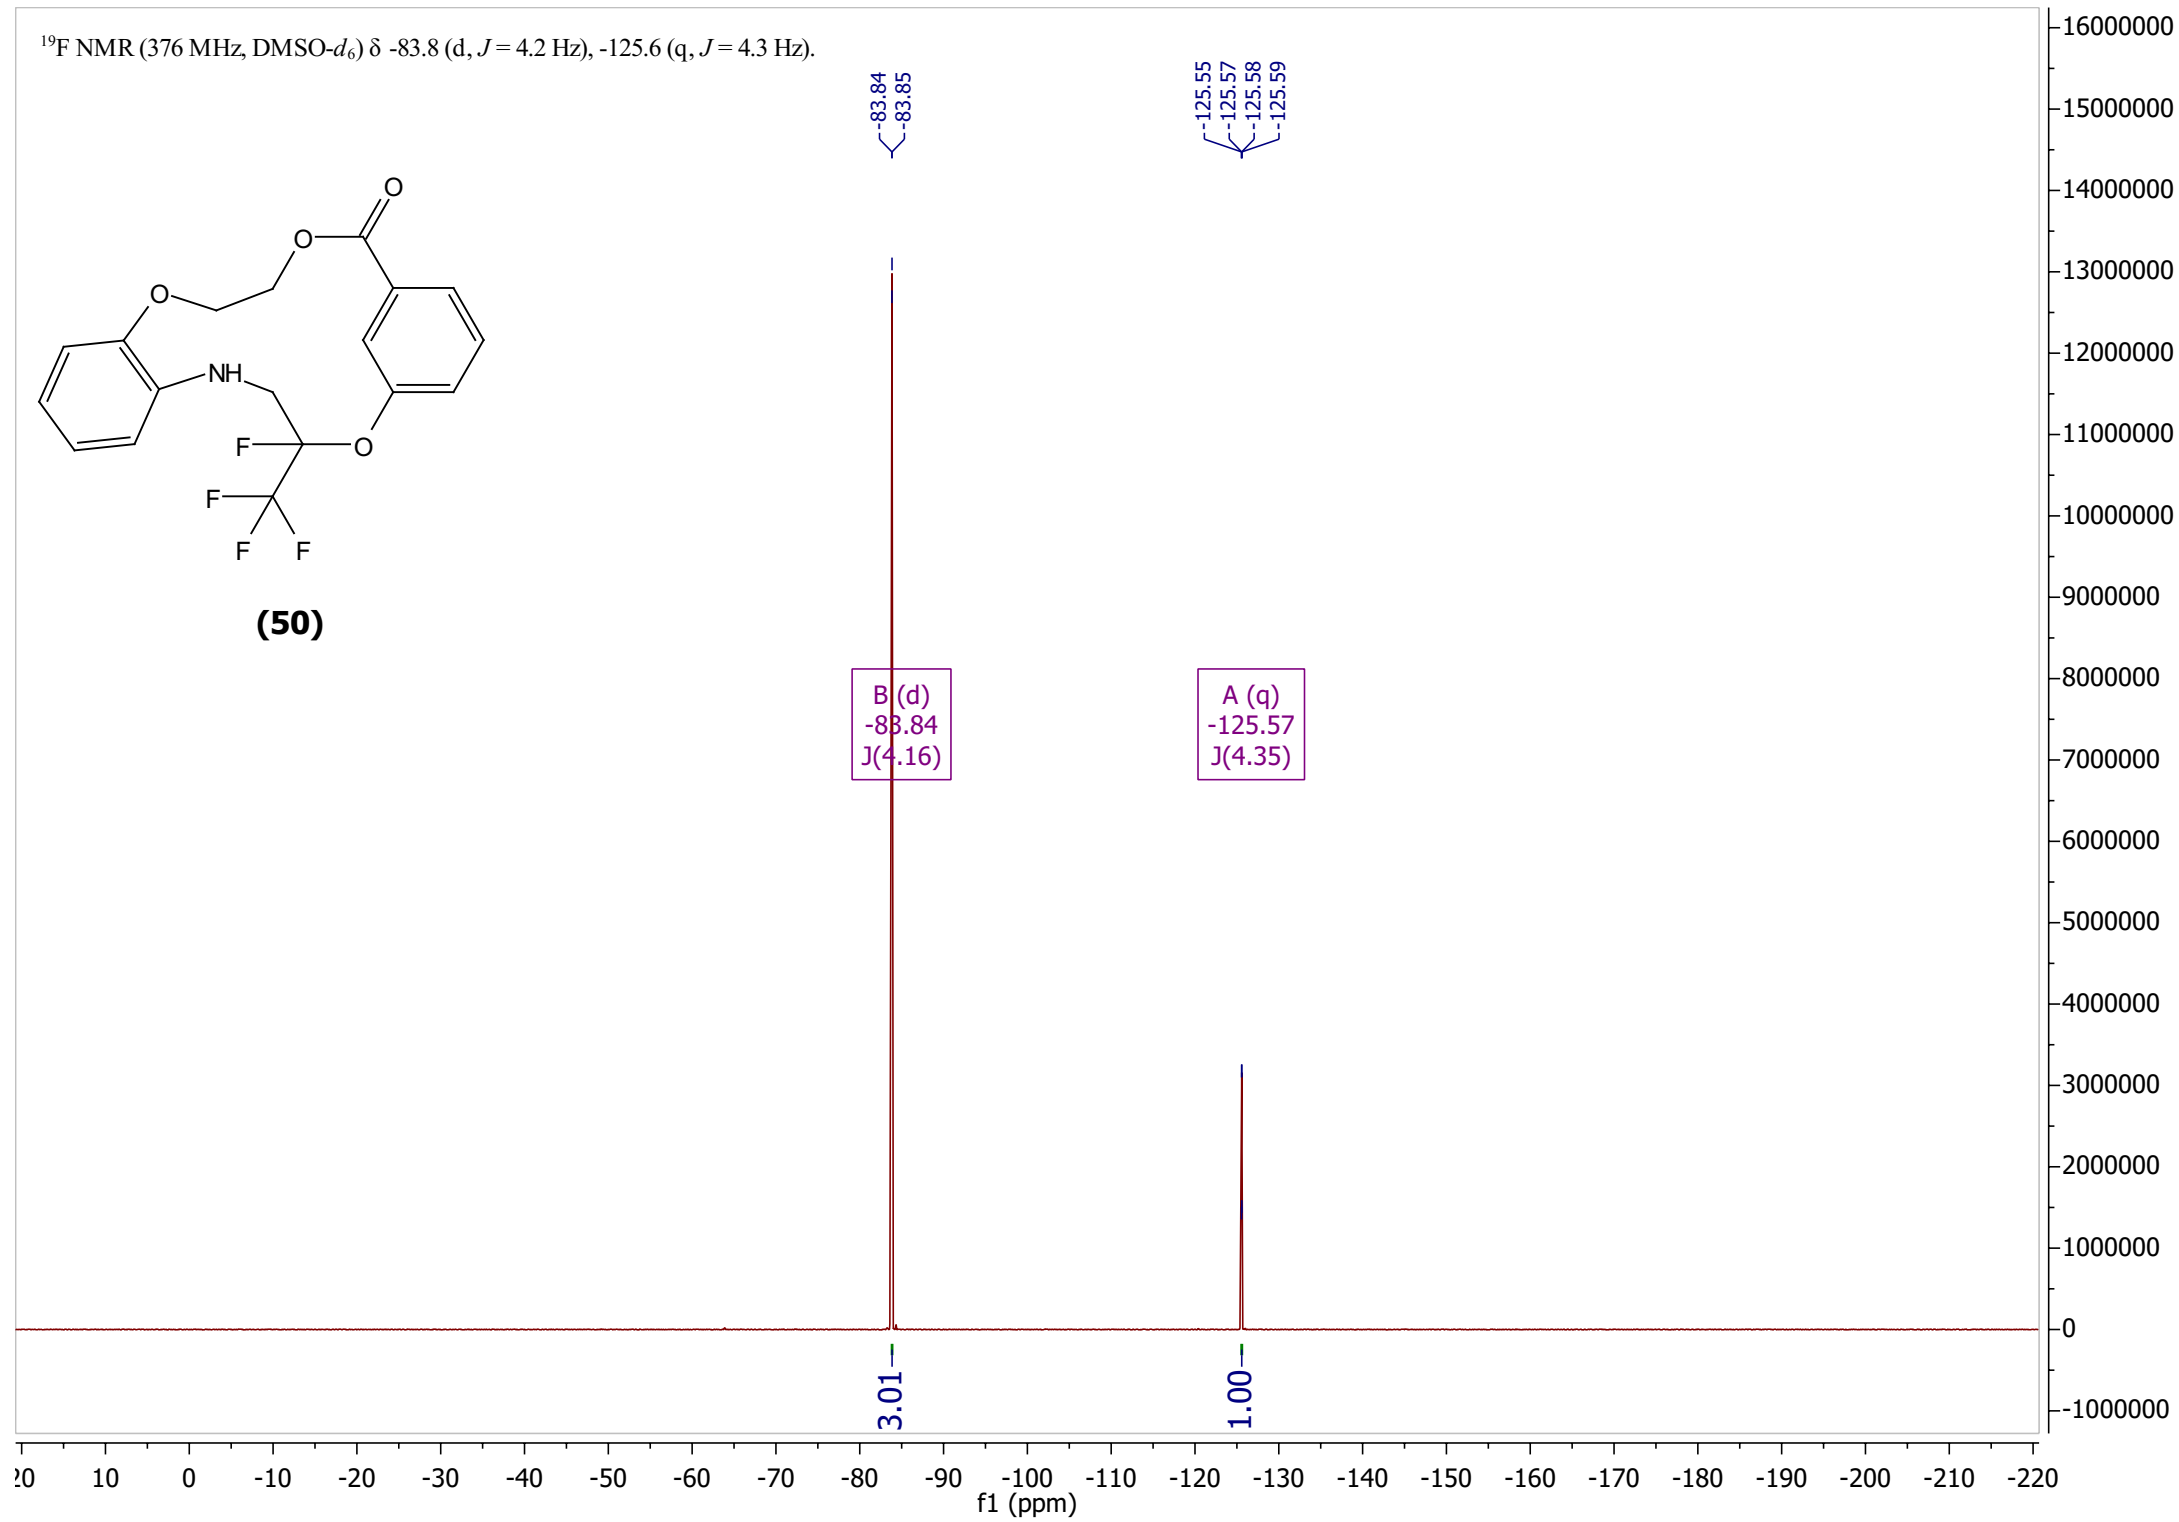

$^{13}\text{C}$  NMR (101 MHz, DMSO- $d_6$ )  $\delta$  164.9, 151.0, 145.8, 137.4, 131.2, 130.6, 125.2, 124.6, 122.4, 121.4 (d,  $J = 2.7$  Hz), 120.5 (dd,  $J = 286.7, 33.7$  Hz), 116.8, 115.4, 109.5, 108.8 (dd,  $J = 247.8, 32.5$  Hz), 68.3, 63.1, 42.1 (d,  $J = 22.2$  Hz).

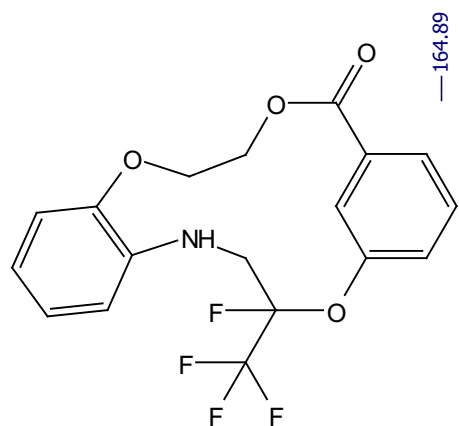

**(50)**

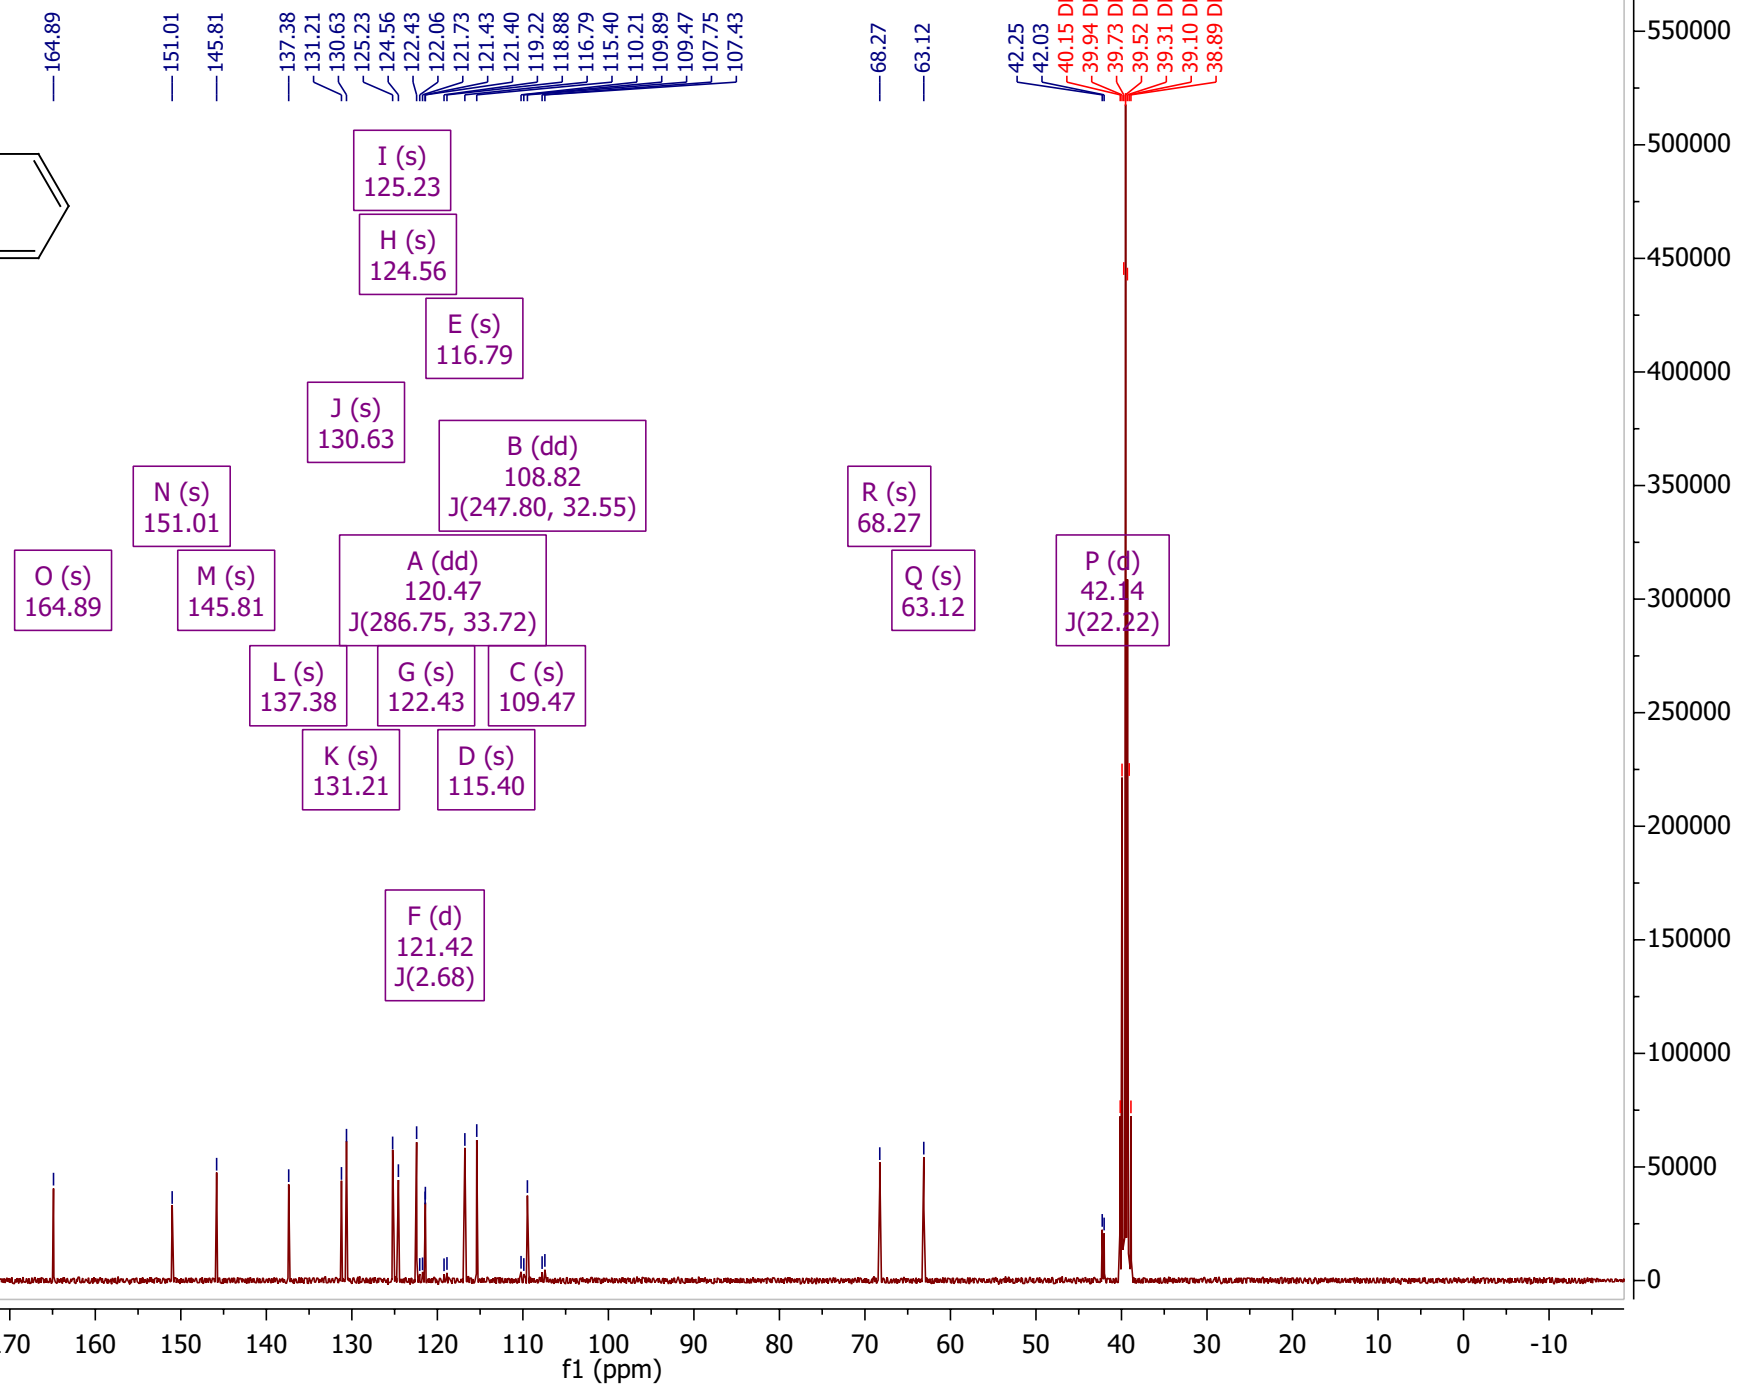

$^1\text{H}$  NMR (400 MHz, Chloroform-*d*)  $\delta$  7.96 (d,  $J = 8.7$  Hz, 2H), 7.17 (d,  $J = 8.3$  Hz, 2H), 4.29 (q,  $J = 7.1$  Hz, 2H), 3.24 – 3.01 (m, 2H), 2.57 – 2.36 (m, 2H), 1.36 – 1.11 (m, 8H), 0.79 (t,  $J = 7.3$  Hz, 3H).

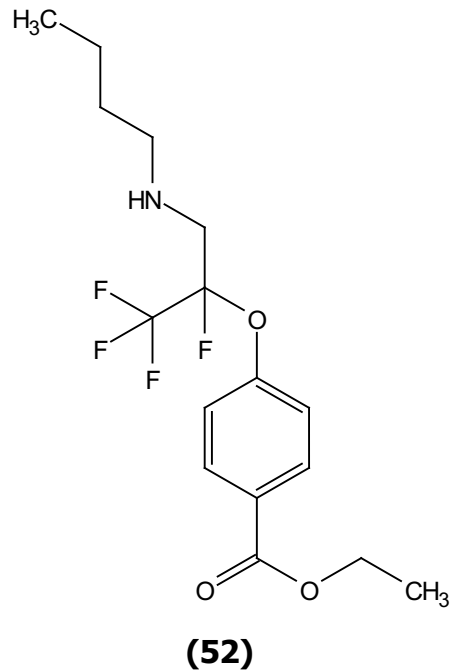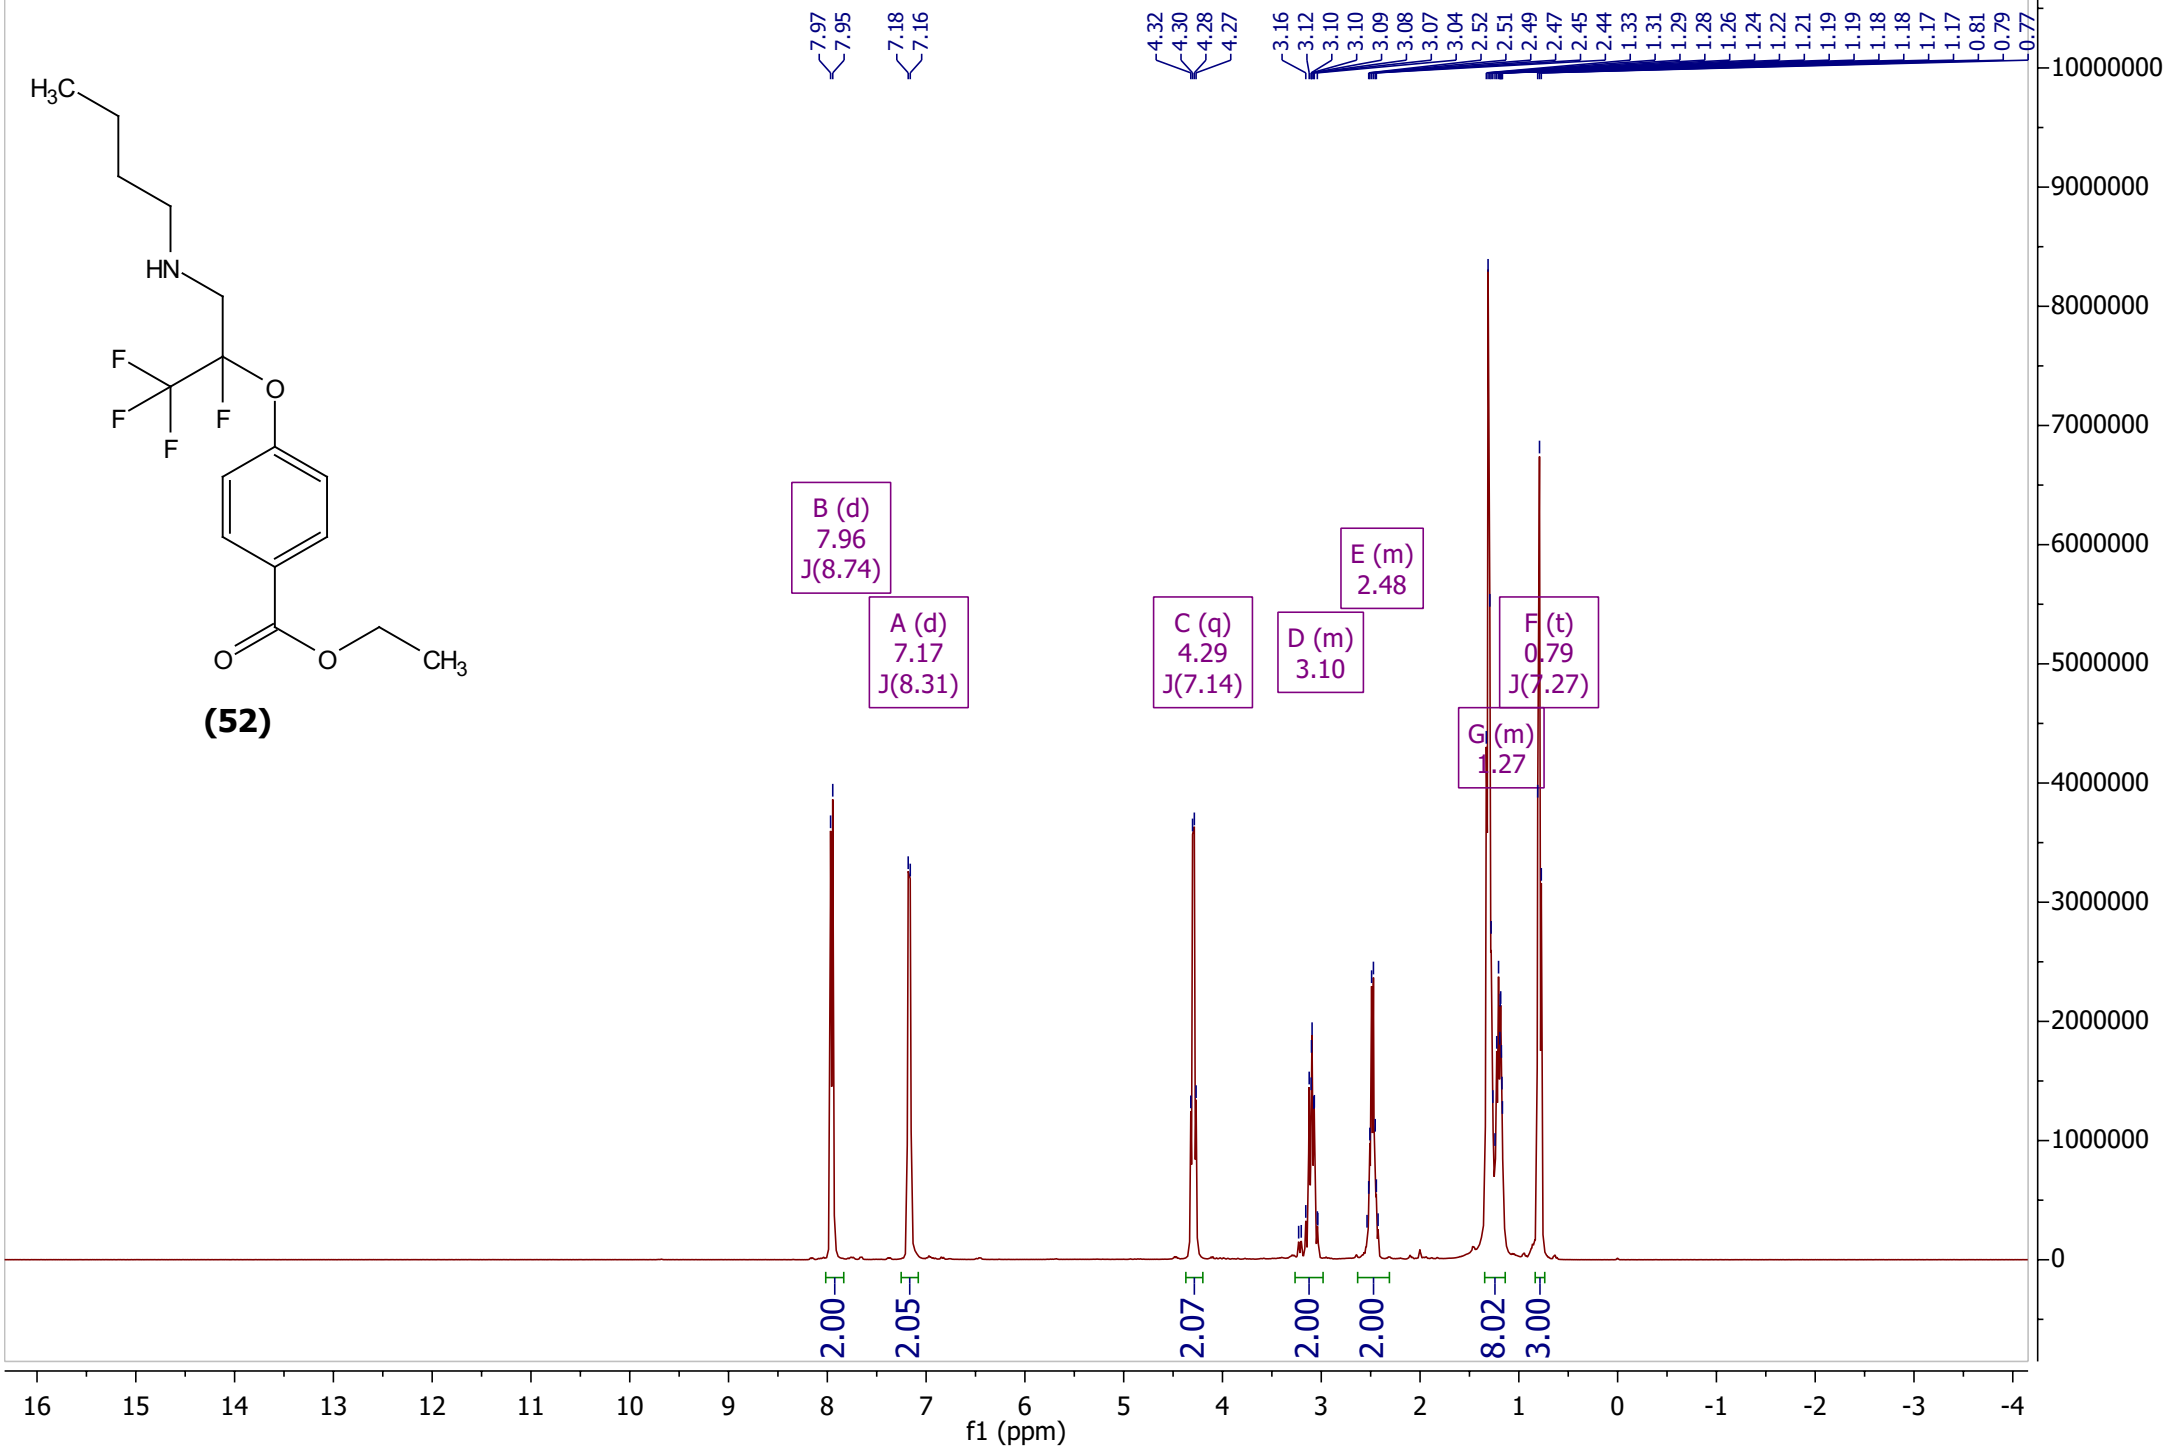

$^{19}\text{F}$  NMR (376 MHz, Chloroform-*d*)  $\delta$  -80.5 (d,  $J = 2.8$  Hz), -123.5 (q,  $J = 2.7$  Hz).

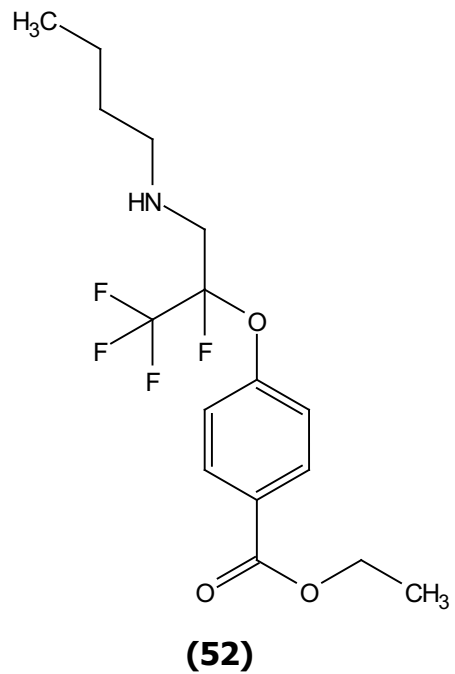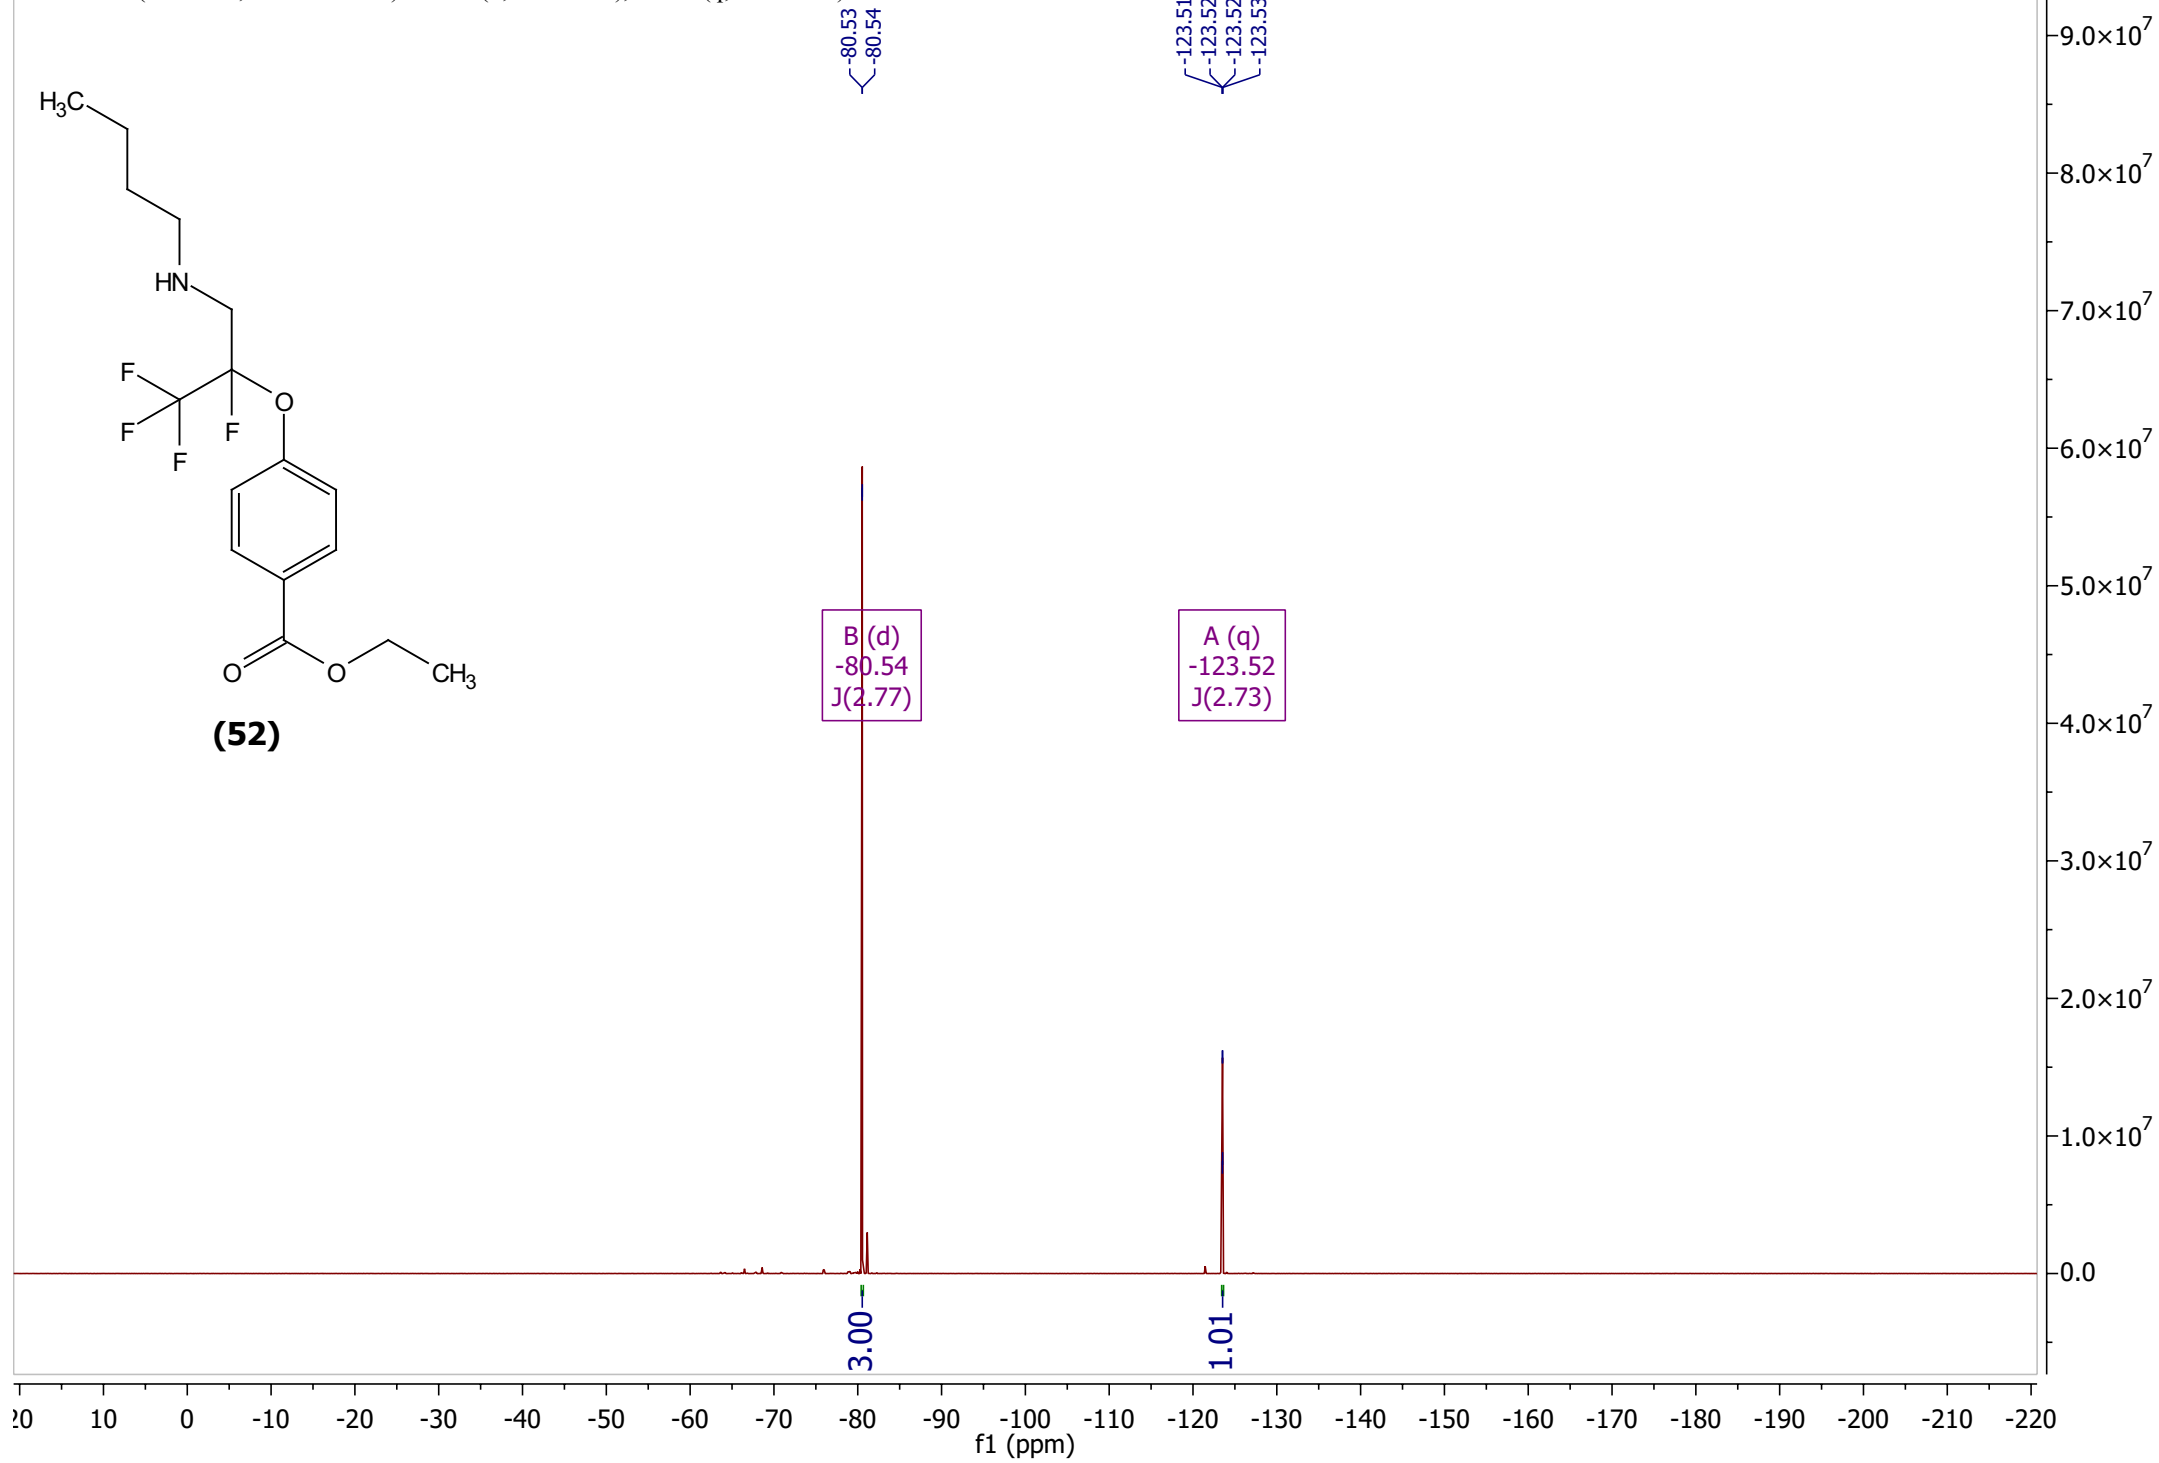

<sup>13</sup>C NMR (101 MHz, Chloroform-*d*) δ 165.9, 155.7, 131.3, 127.9, 121.9 (d, *J* = 2.5 Hz), 120.6 (dd, *J* = 287.5, 37.3 Hz), 109.4 (dq, *J* = 239.0, 33.1 Hz), 61.2, 49.7, 49.4 (d, *J* = 28.0 Hz), 32.1, 20.2, 14.4, 14.0.

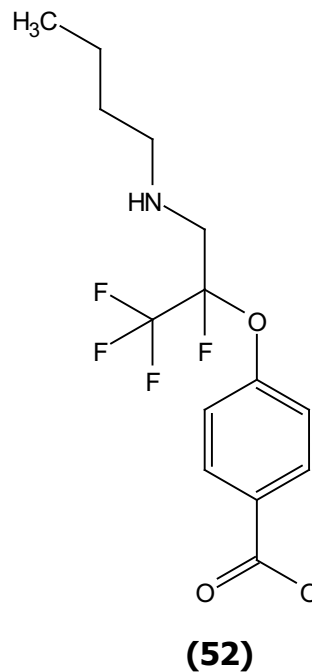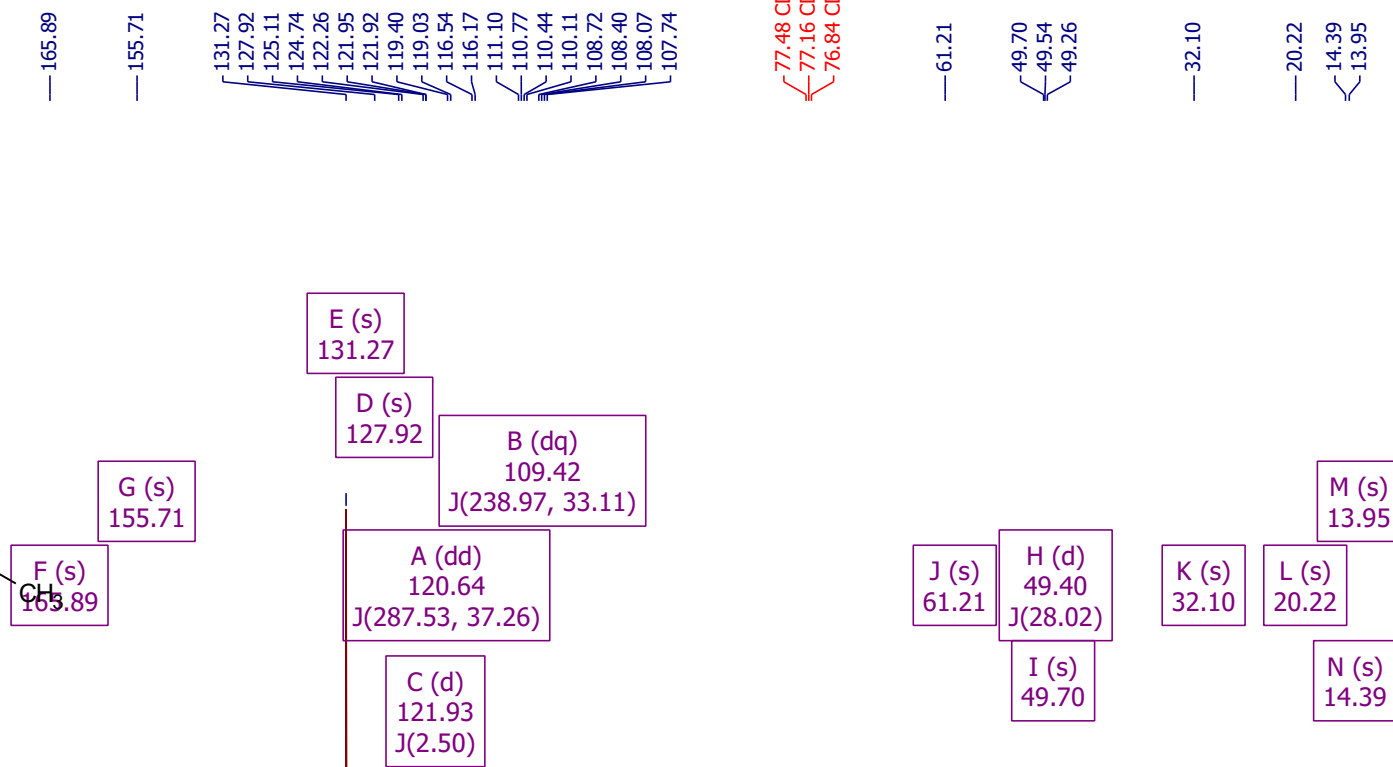

131.27  
127.92  
125.11  
124.74  
122.26  
121.95  
121.92  
119.40  
119.03  
116.54  
116.17  
111.10  
110.77  
110.44  
110.11  
108.72  
108.40  
108.07  
107.74

77.48 CDCl<sub>3</sub>  
77.16 CDCl<sub>3</sub>  
76.84 CDCl<sub>3</sub>

61.21  
49.70  
49.54  
49.26  
32.10  
20.22  
14.39  
13.95

210 200 190 180 170 160 150 140 130 120 110 100 90 80 70 60 50 40 30 20 10 0 -10  
f1 (ppm)

$^1\text{H}$  NMR (400 MHz, Chloroform-*d*)  $\delta$  8.02 (d,  $J = 8.7$  Hz, 2H), 7.22 (d,  $J = 8.4$  Hz, 2H), 4.37 (q,  $J = 7.1$  Hz, 2H), 3.13 – 2.92 (m, 2H), 2.75 – 2.60 (m, 4H), 1.80 (s, 2H), 1.76 – 1.64 (m, 4H), 1.57 – 1.48 (m, 4H), 1.39 (t,  $J = 7.1$  Hz, 3H).

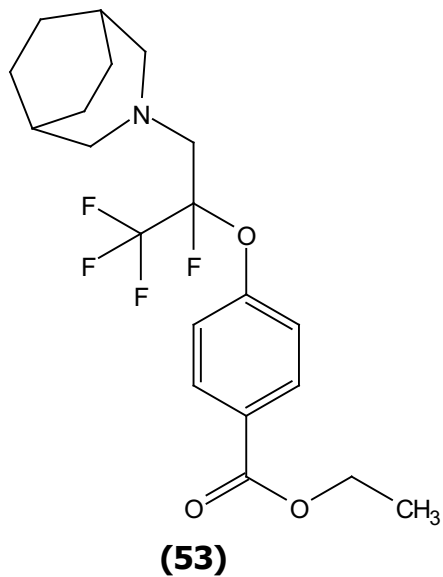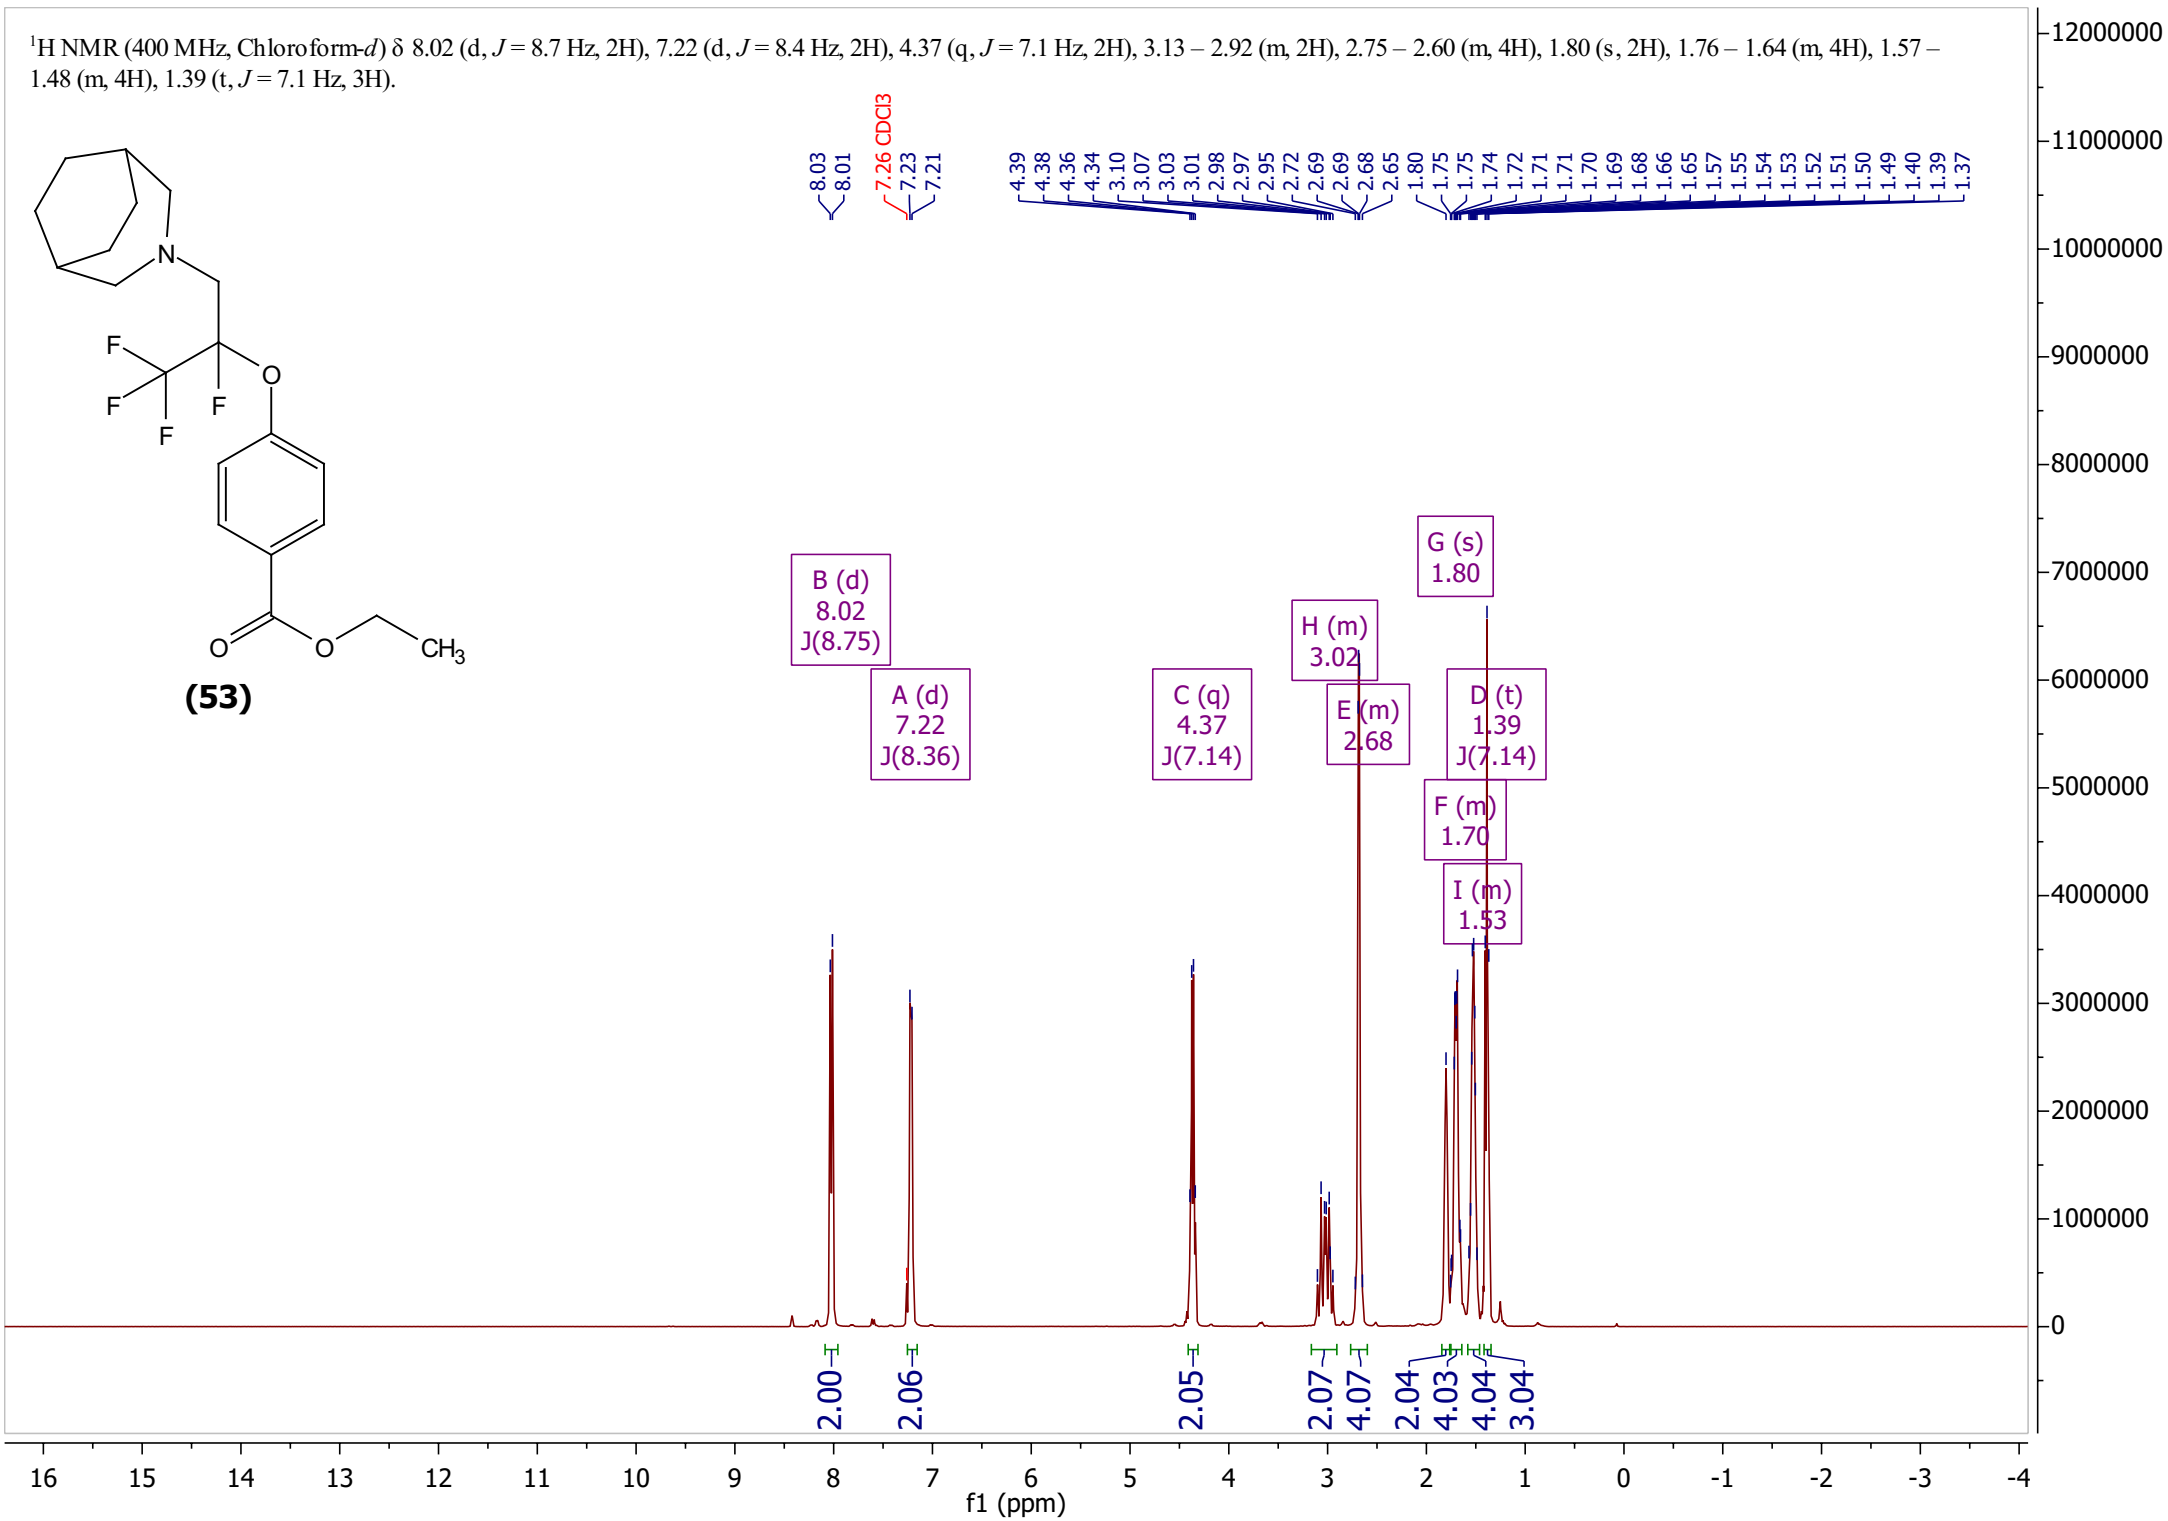

$^{19}\text{F}$  NMR (376 MHz, Chloroform-*d*)  $\delta$  -80.2 (d,  $J = 2.7$  Hz), -122.9 (q,  $J = 2.5$  Hz).

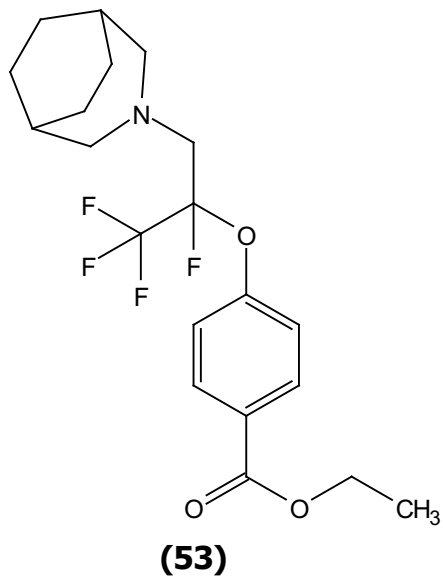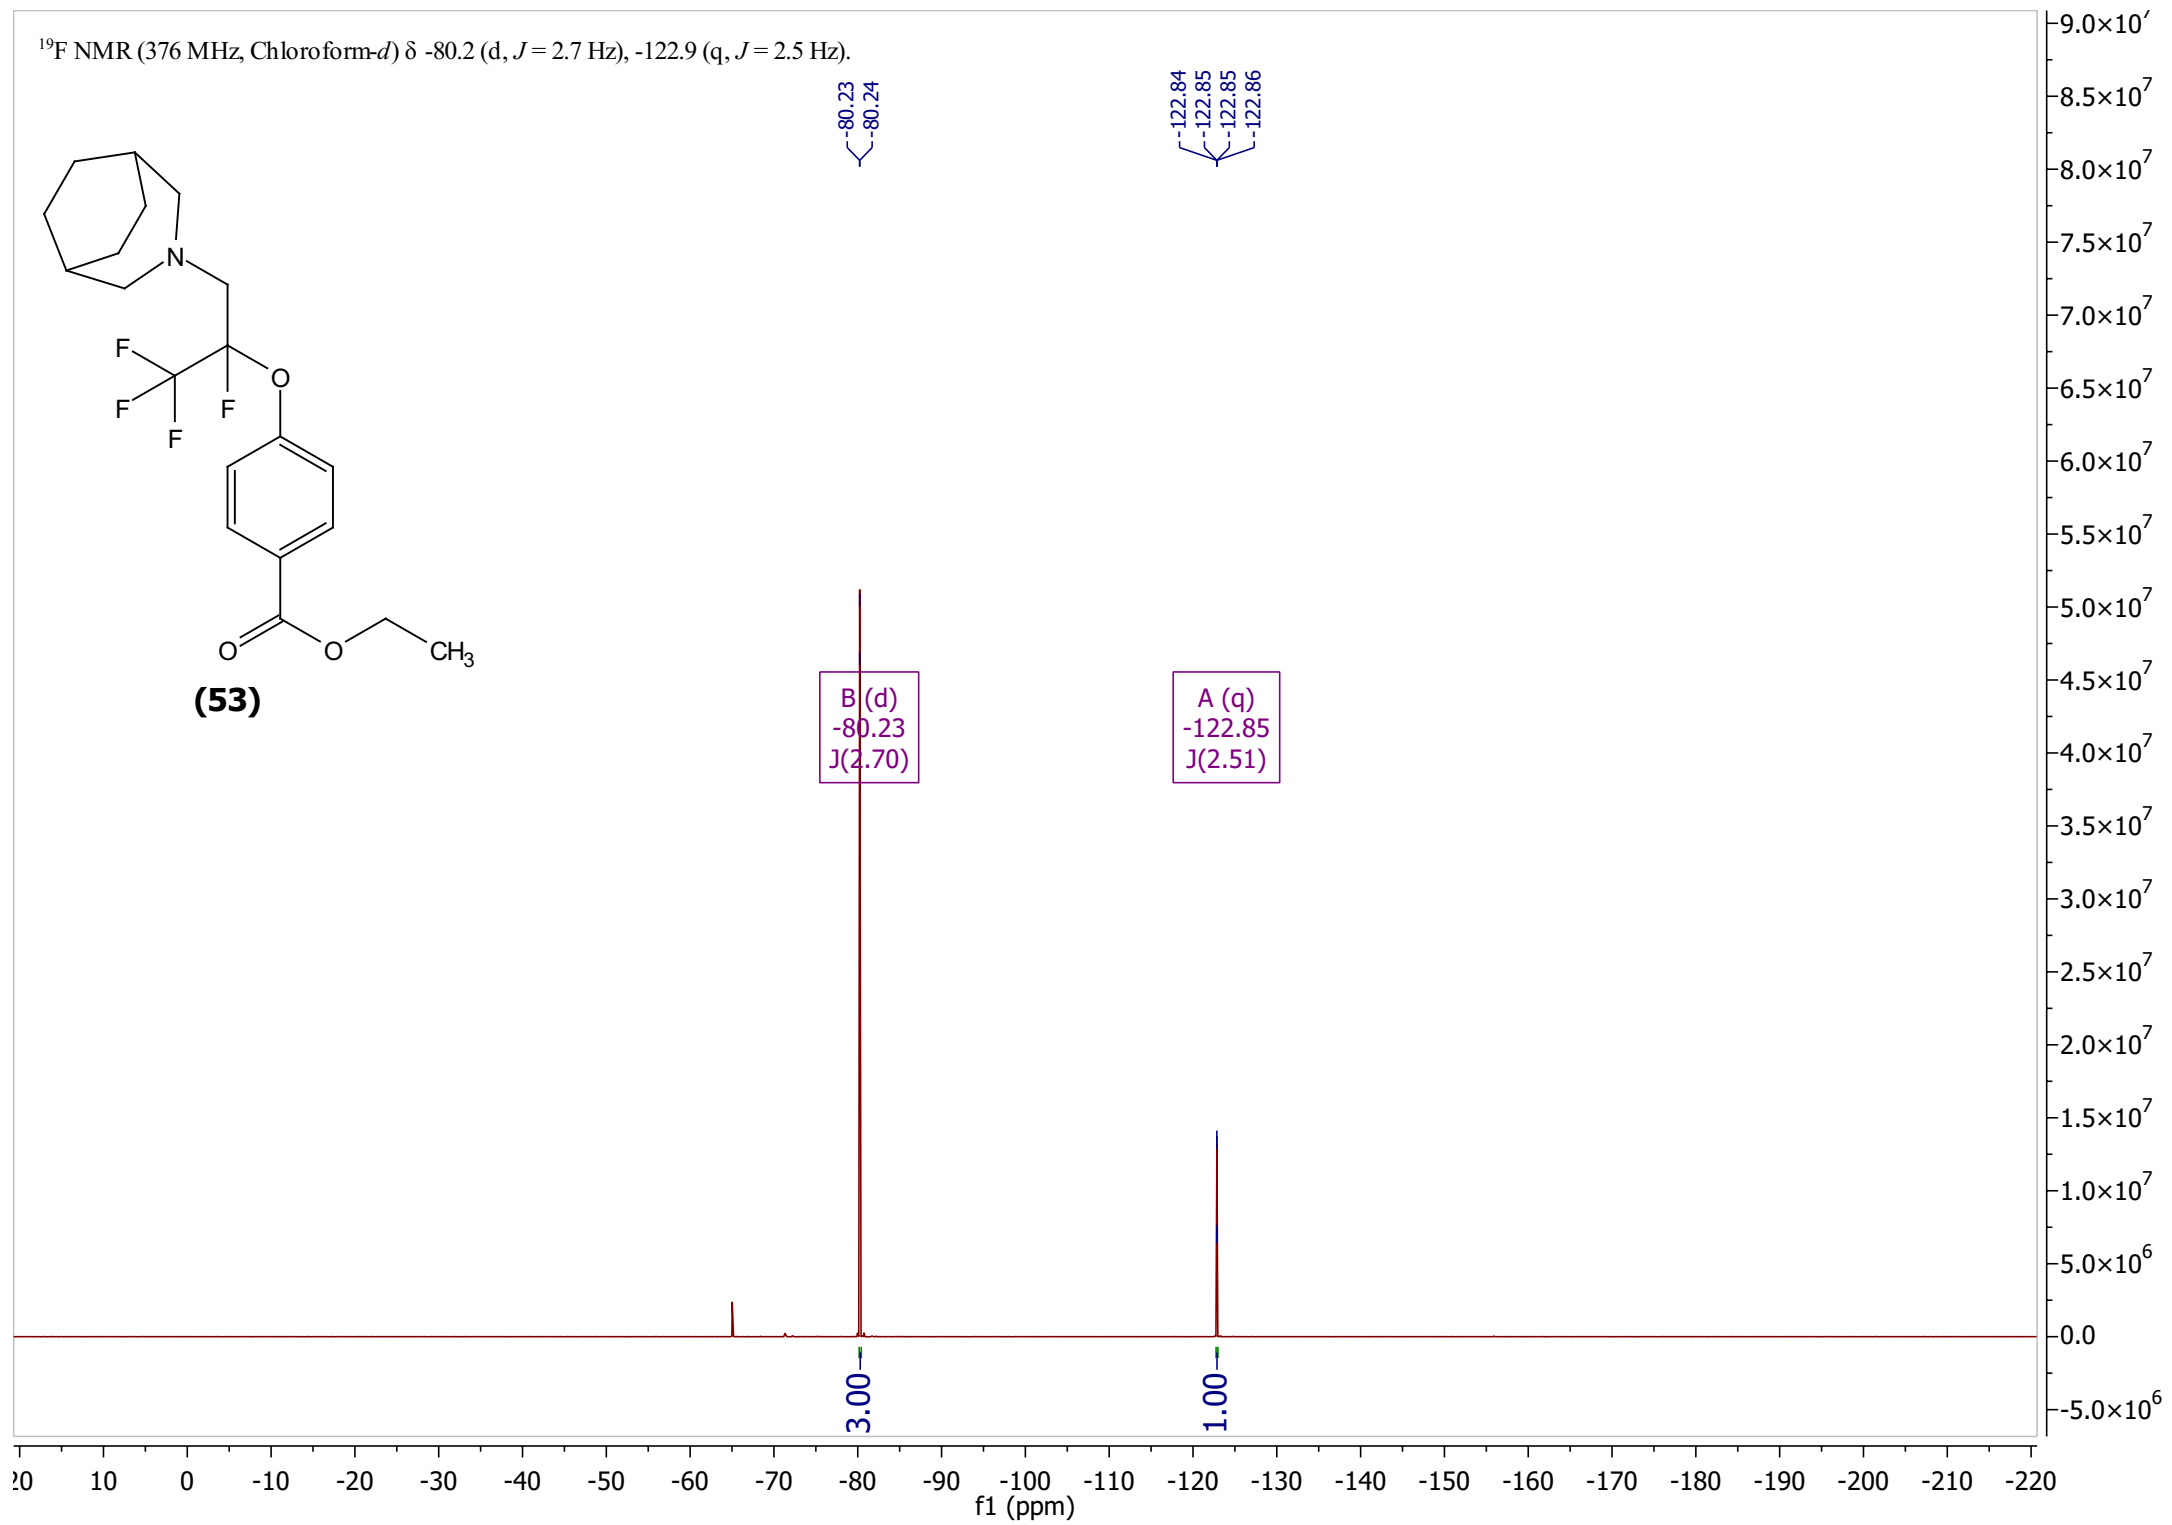

$^{13}\text{C}$  NMR (101 MHz, Chloroform- $d$ )  $\delta$  166.0, 156.1, 131.3, 127.5, 121.4 (d,  $J=2.9$  Hz), 120.7 (qd,  $J=287.9, 37.3$  Hz), 110.1 (dq,  $J=241.8, 32.5$  Hz), 64.5 (d,  $J=1.6$  Hz), 61.2, 58.0 (d,  $J=26.3$  Hz), 30.7, 25.6, 25.5, 14.4.

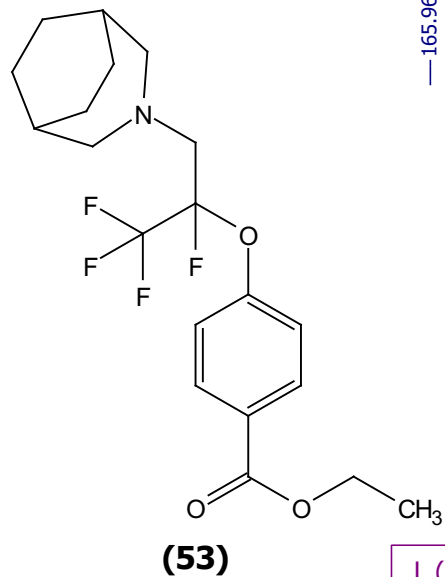

(53)

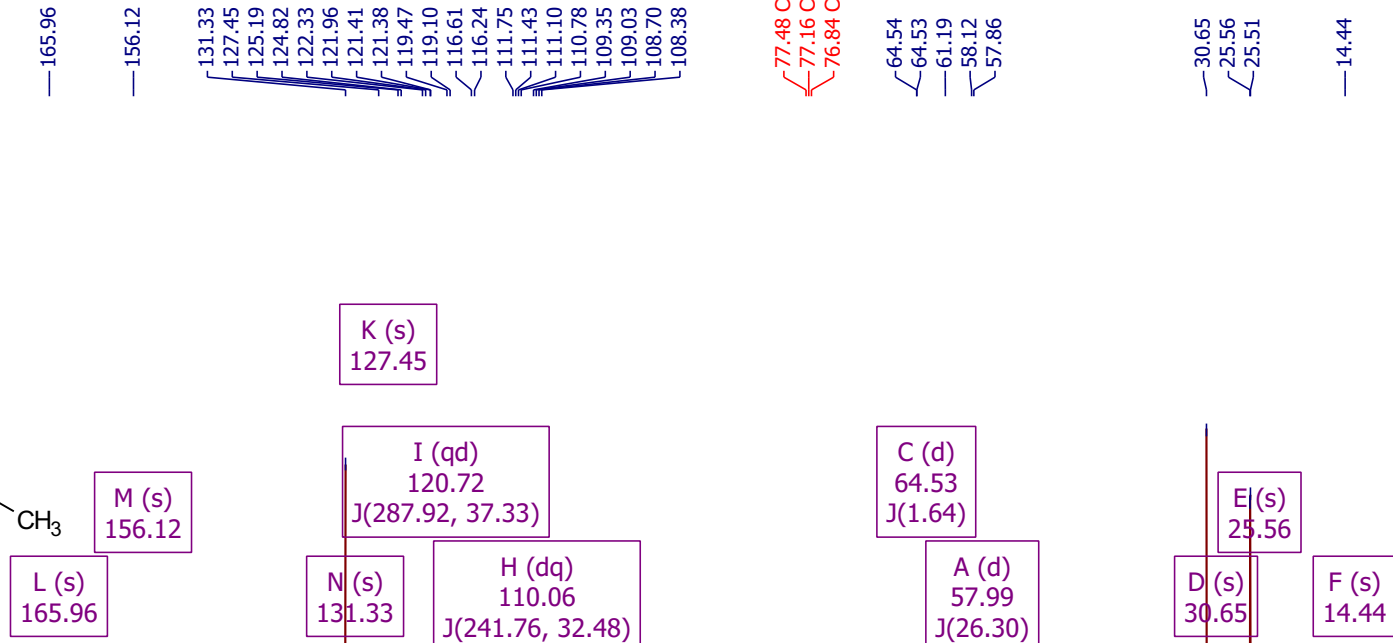

210 200 190 180 170 160 150 140 130 120 110 100 90 80 70 60 50 40 30 20 10 0 -10  
f1 (ppm)



$^1\text{H}$  NMR (400 MHz, Chloroform-*d*)  $\delta$  8.01 (d,  $J = 8.7$  Hz, 2H), 7.21 (d,  $J = 8.3$  Hz, 2H), 4.35 (q,  $J = 7.1$  Hz, 2H), 3.55 (d,  $J = 3.3$  Hz, 4H), 3.06 – 2.73 (m, 2H), 2.47 (t,  $J = 4.6$  Hz, 4H), 1.37 (t,  $J = 7.1$  Hz, 3H).

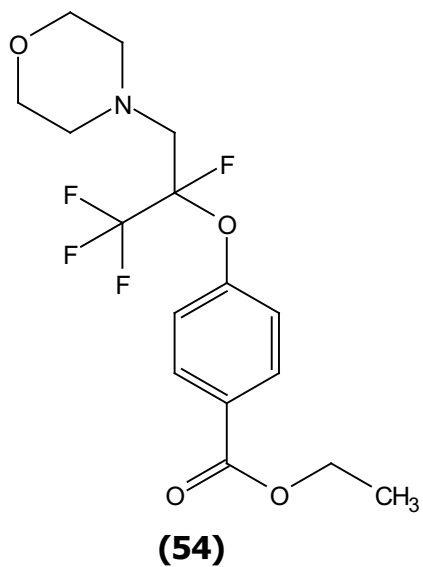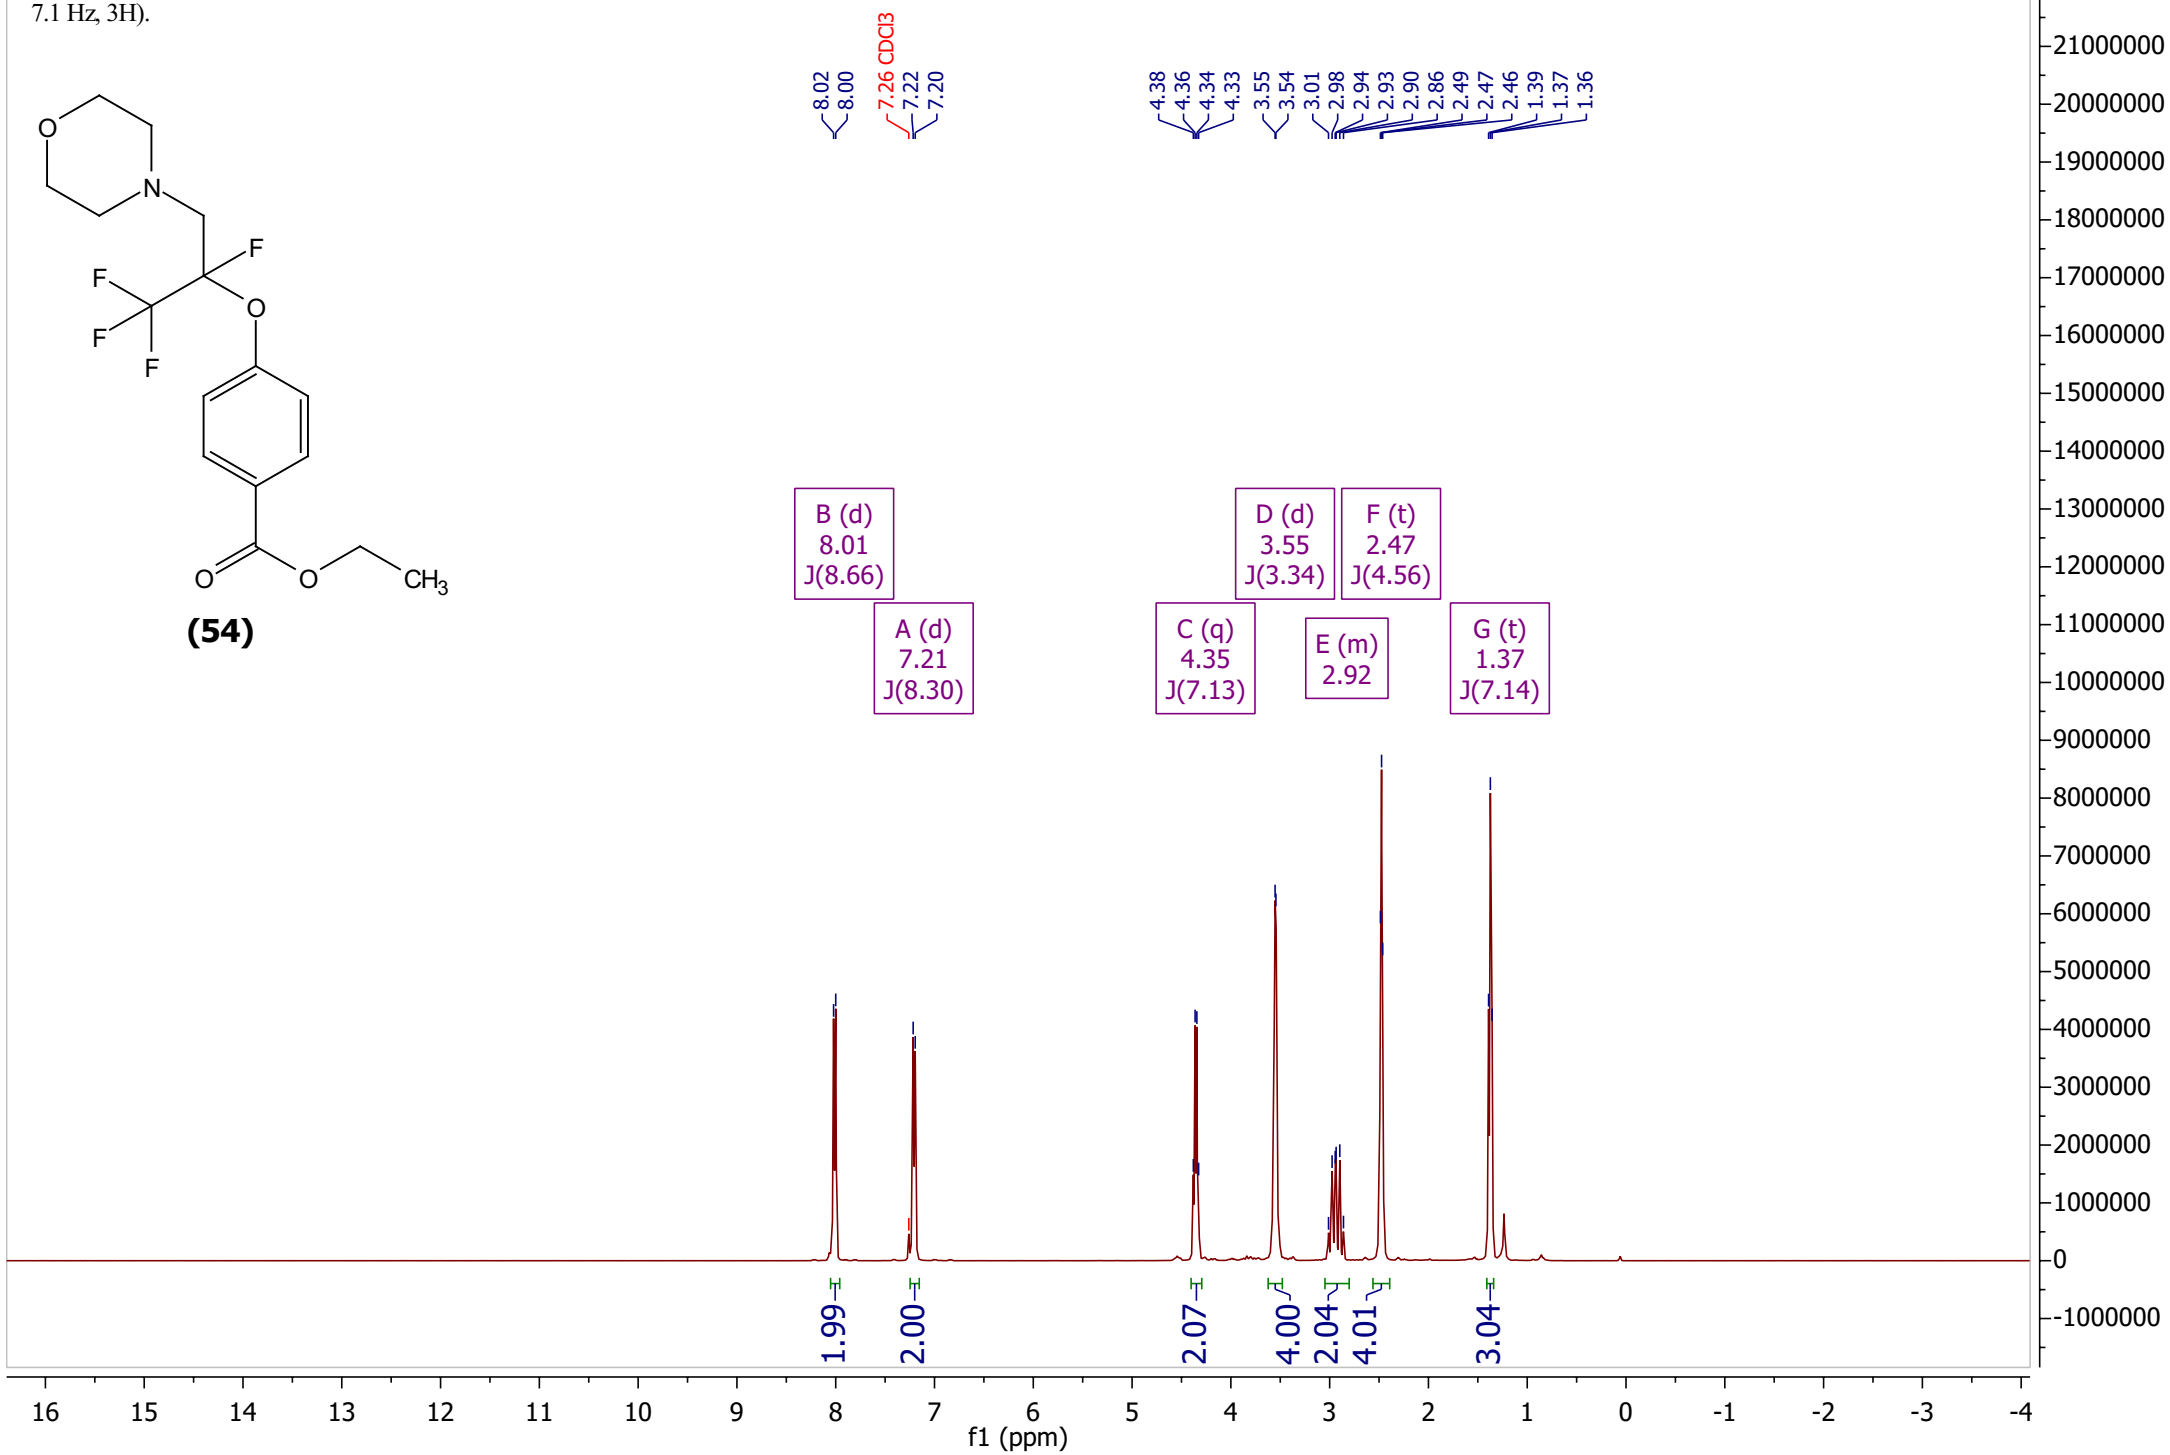

$^{19}\text{F}$  NMR (376 MHz, Chloroform-*d*)  $\delta$  -80.8 (d,  $J = 2.7$  Hz), -122.0 (q,  $J = 2.2$  Hz).

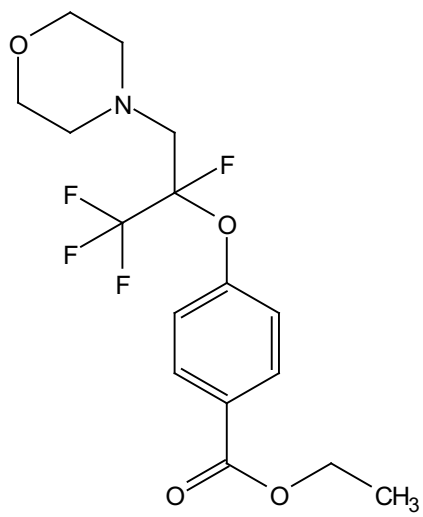

**(54)**

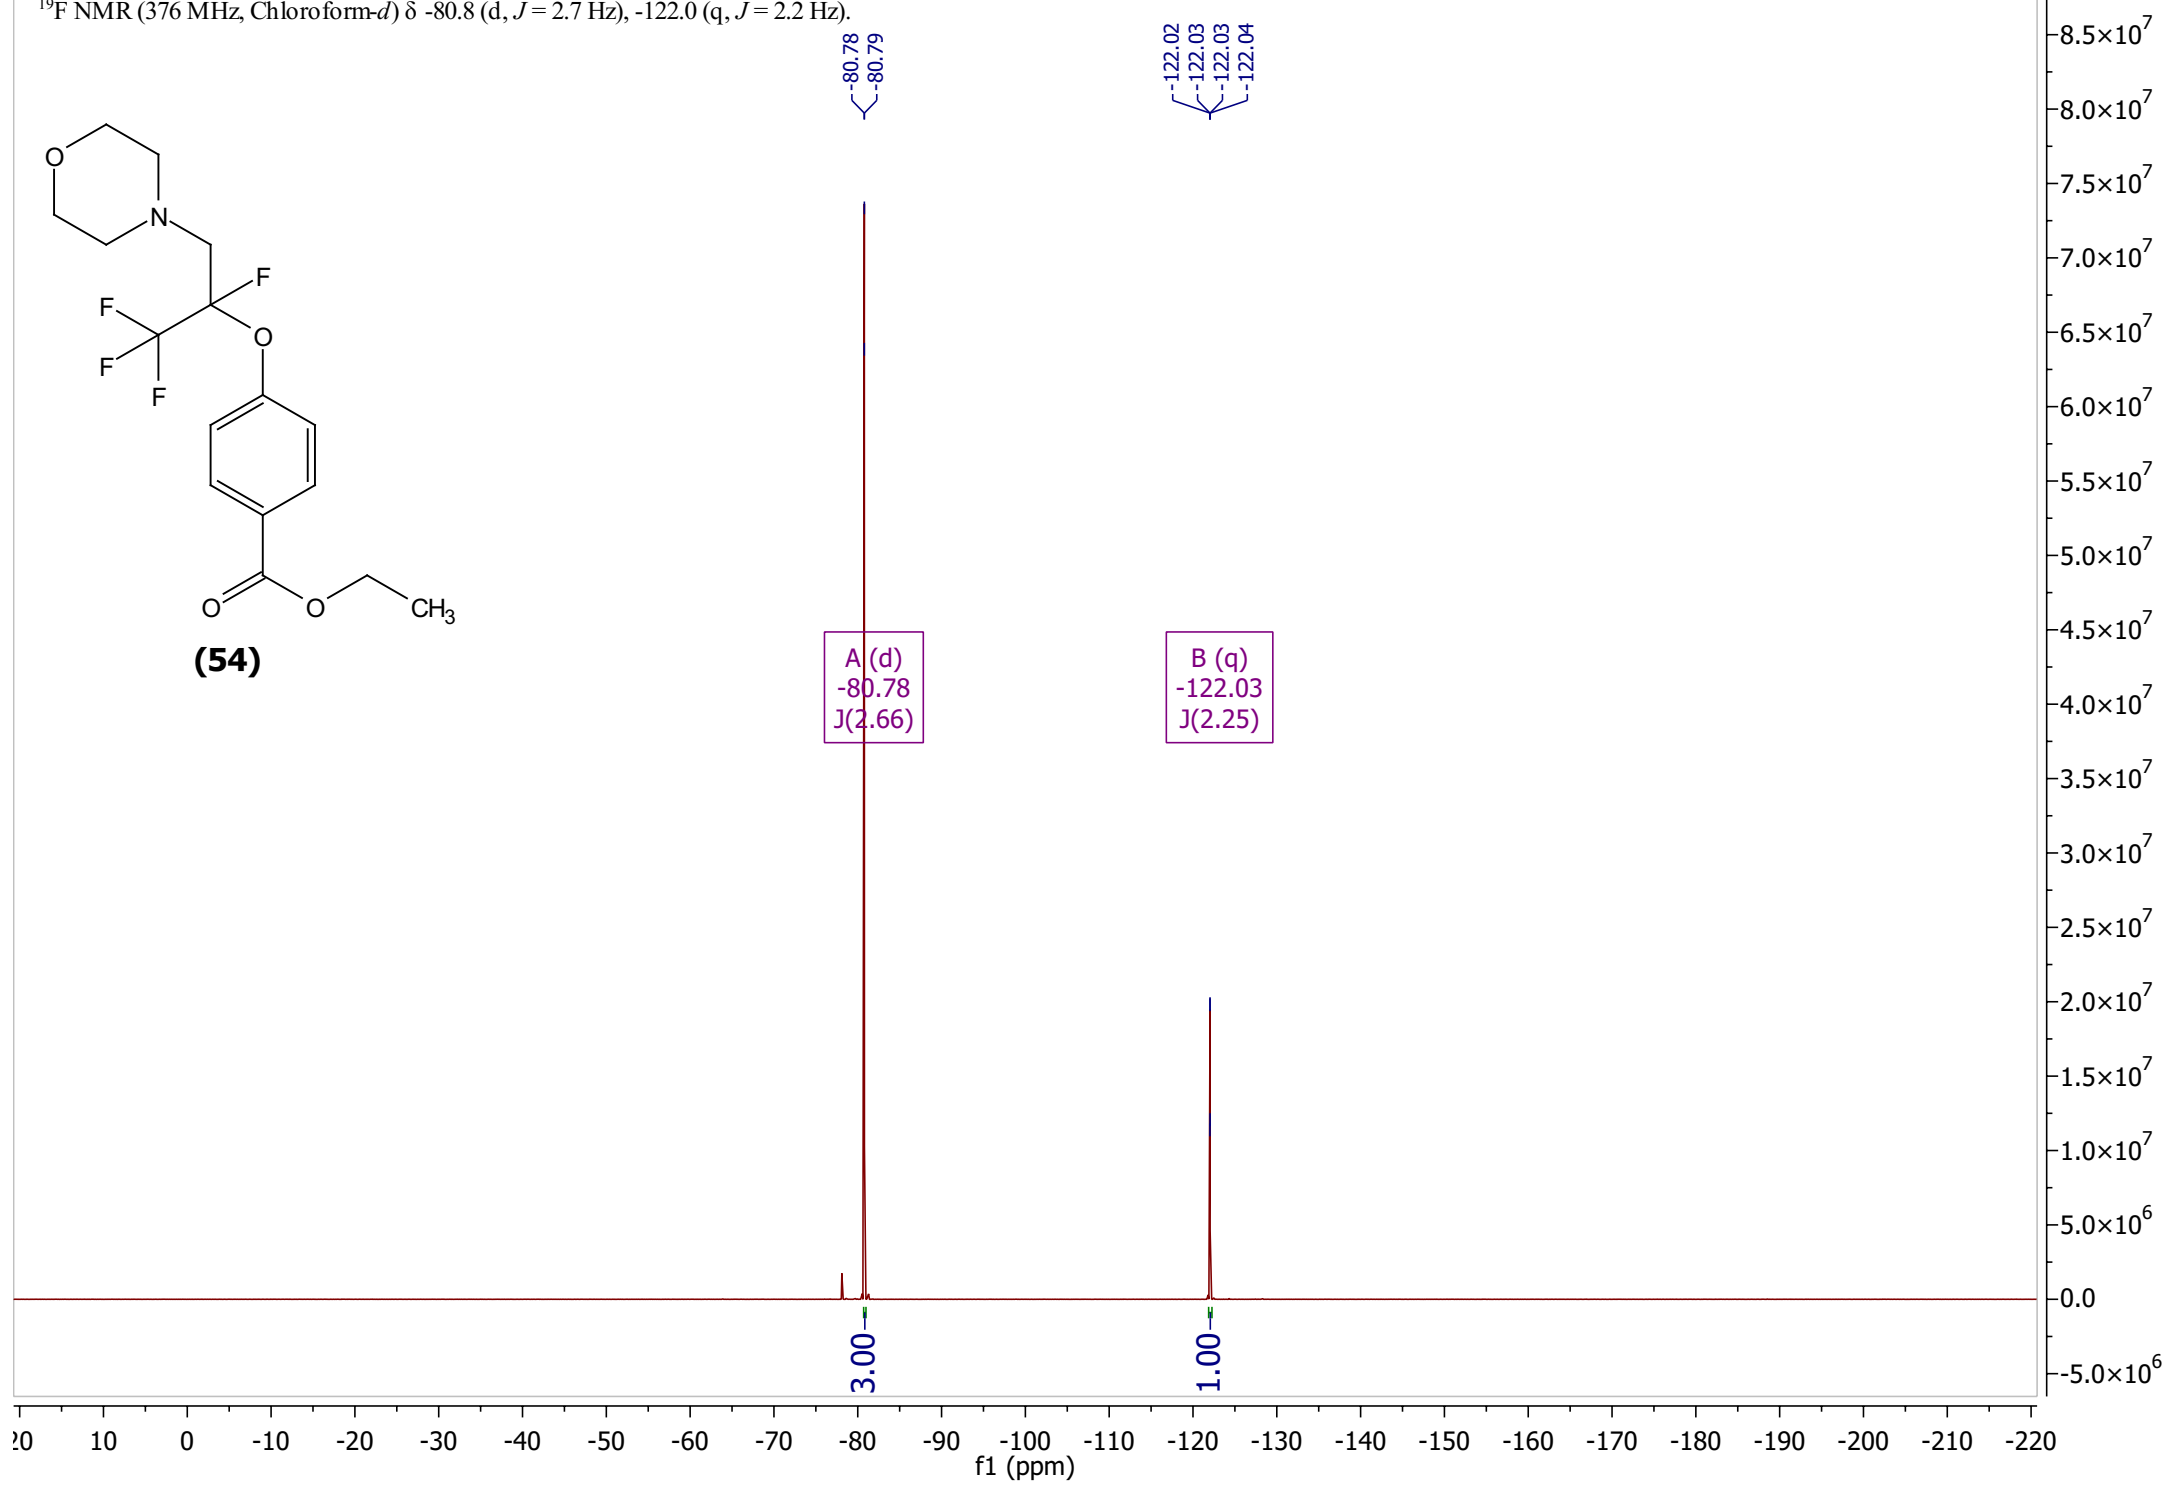

$^{13}\text{C}$  NMR (101 MHz, Chloroform-*d*)  $\delta$  165.8, 156.1, 131.2, 127.7, 121.6 (d,  $J = 2.8$  Hz), 120.5 (qd,  $J = 287.5, 36.7$  Hz), 109.6 (dq,  $J = 241.1, 32.8$  Hz), 67.0, 61.2, 58.2 (d,  $J = 26.2$  Hz), 54.5, 14.4.

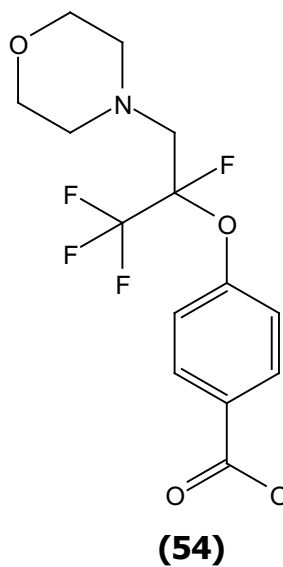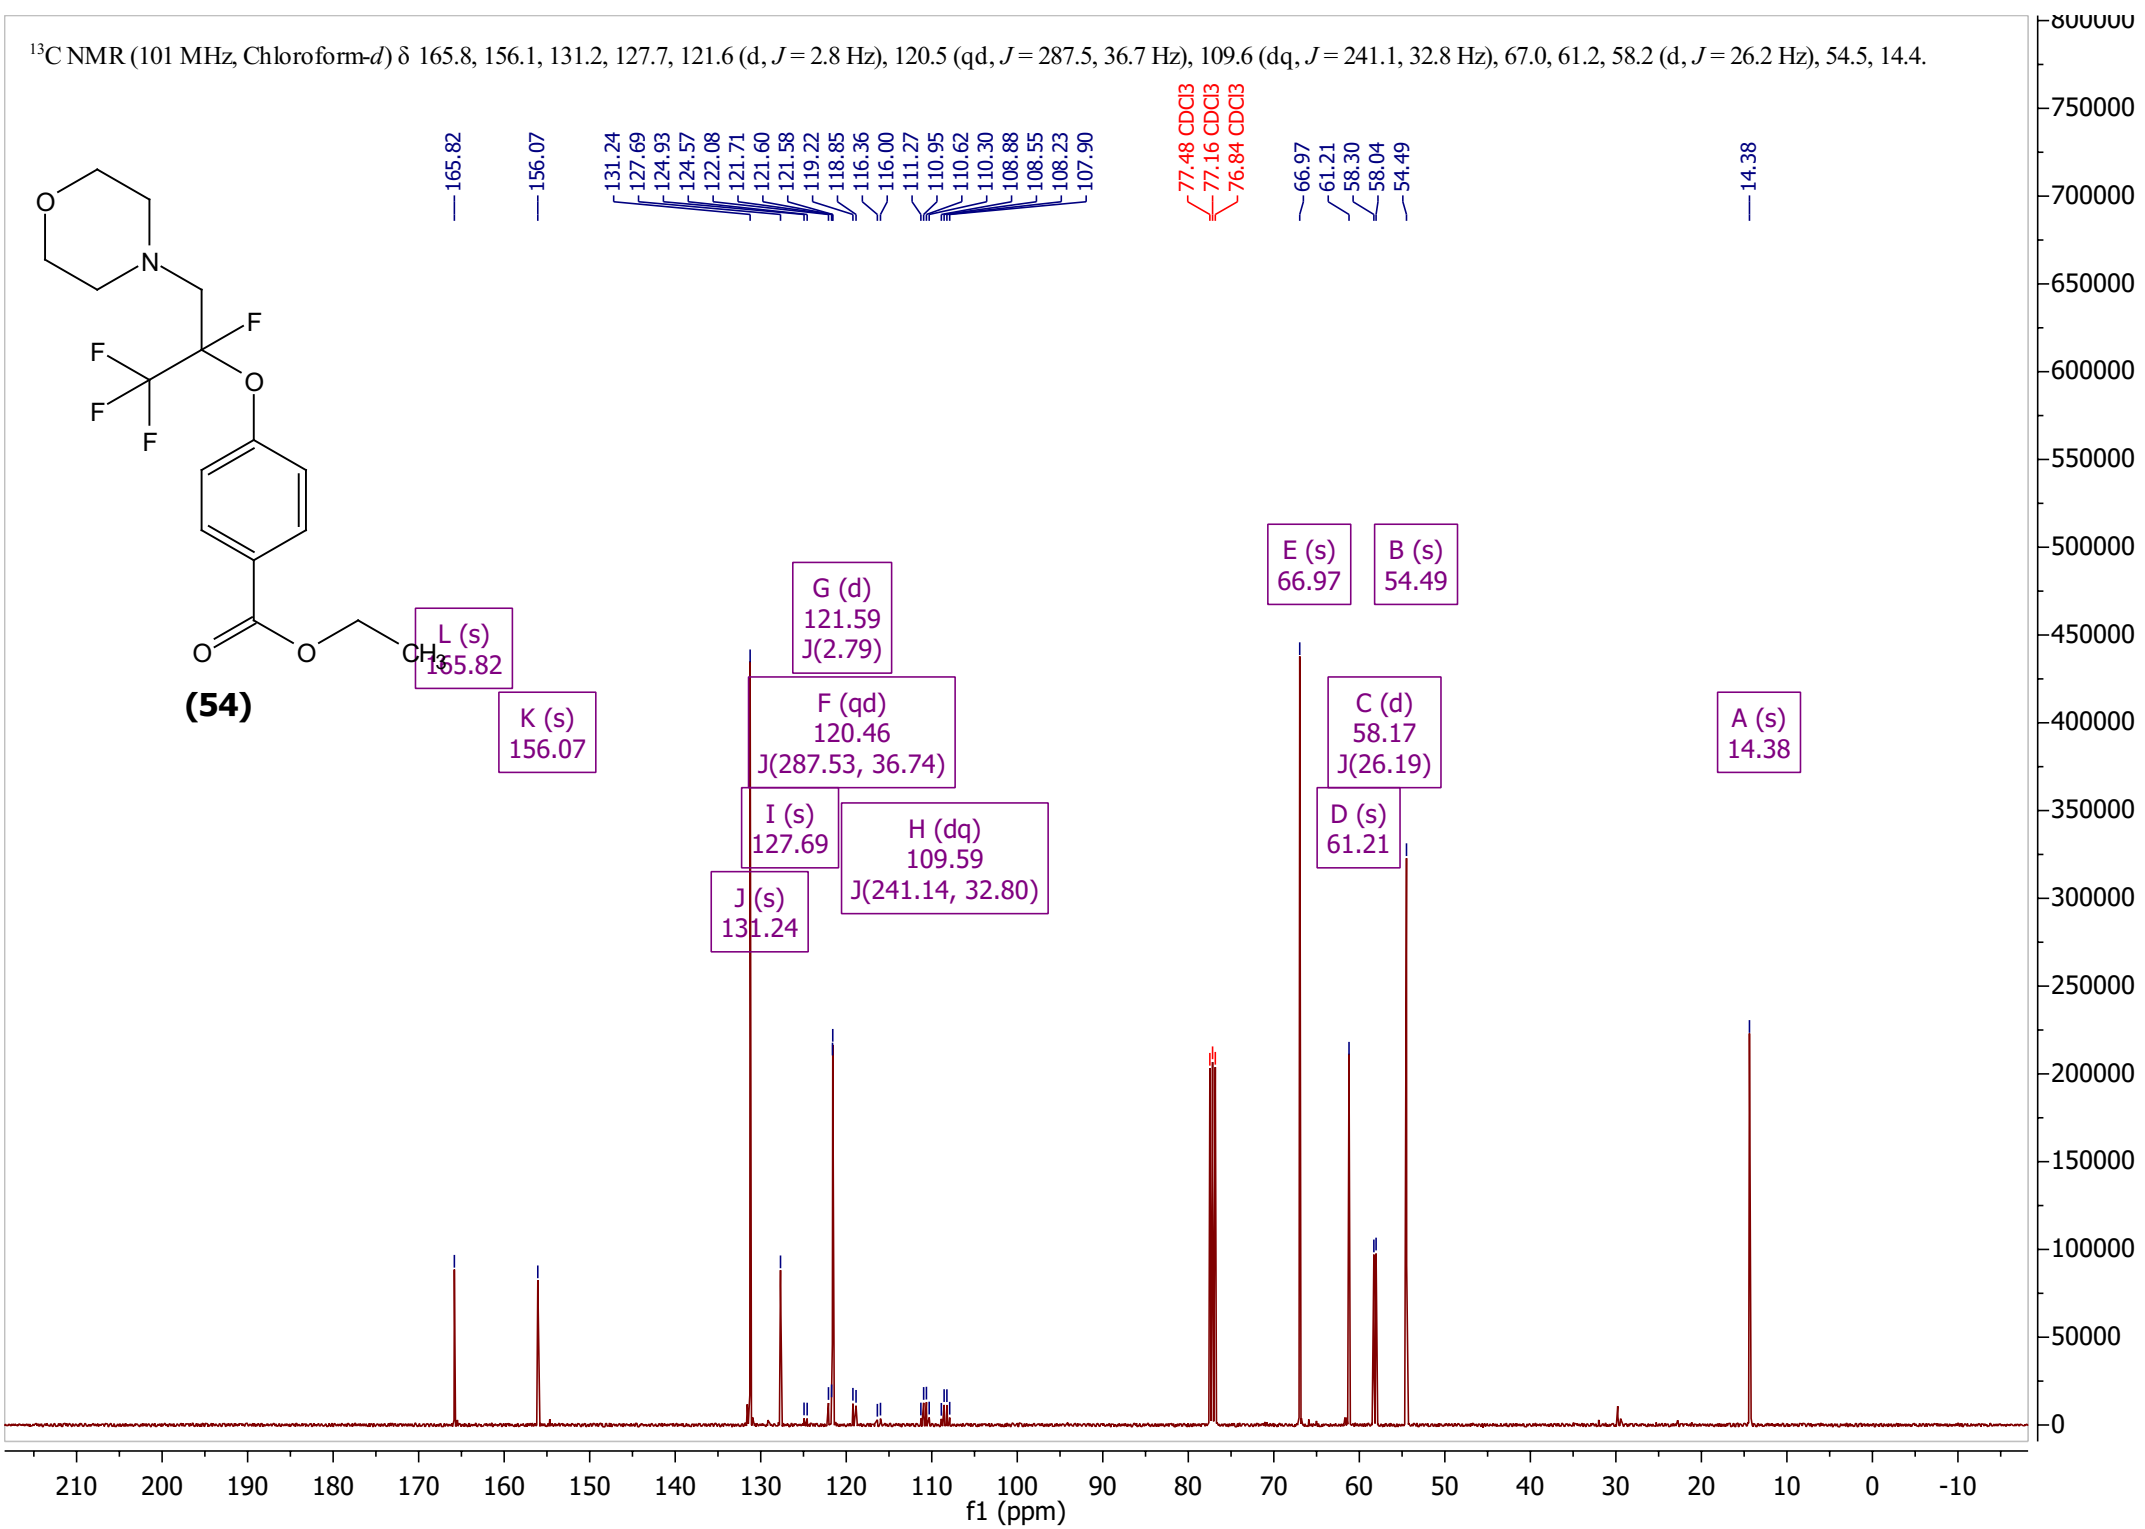

$^1\text{H}$  NMR (400 MHz, Chloroform-*d*)  $\delta$  12.92 (s, 1H), 7.98 (d,  $J = 8.0$  Hz, 2H), 7.30 (d,  $J = 8.2$  Hz, 2H), 4.30 (q,  $J = 7.1$  Hz, 2H), 3.81 – 3.54 (m, 4H), 3.28 (s, 2H), 2.38 (s, 1H), 2.29 (s, 1H), 1.83 (s, 3H), 1.46 (s, 1H), 1.32 (t,  $J = 7.1$  Hz, 3H).

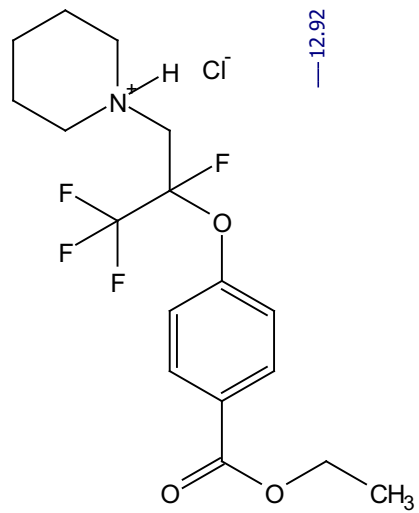

**(55)**

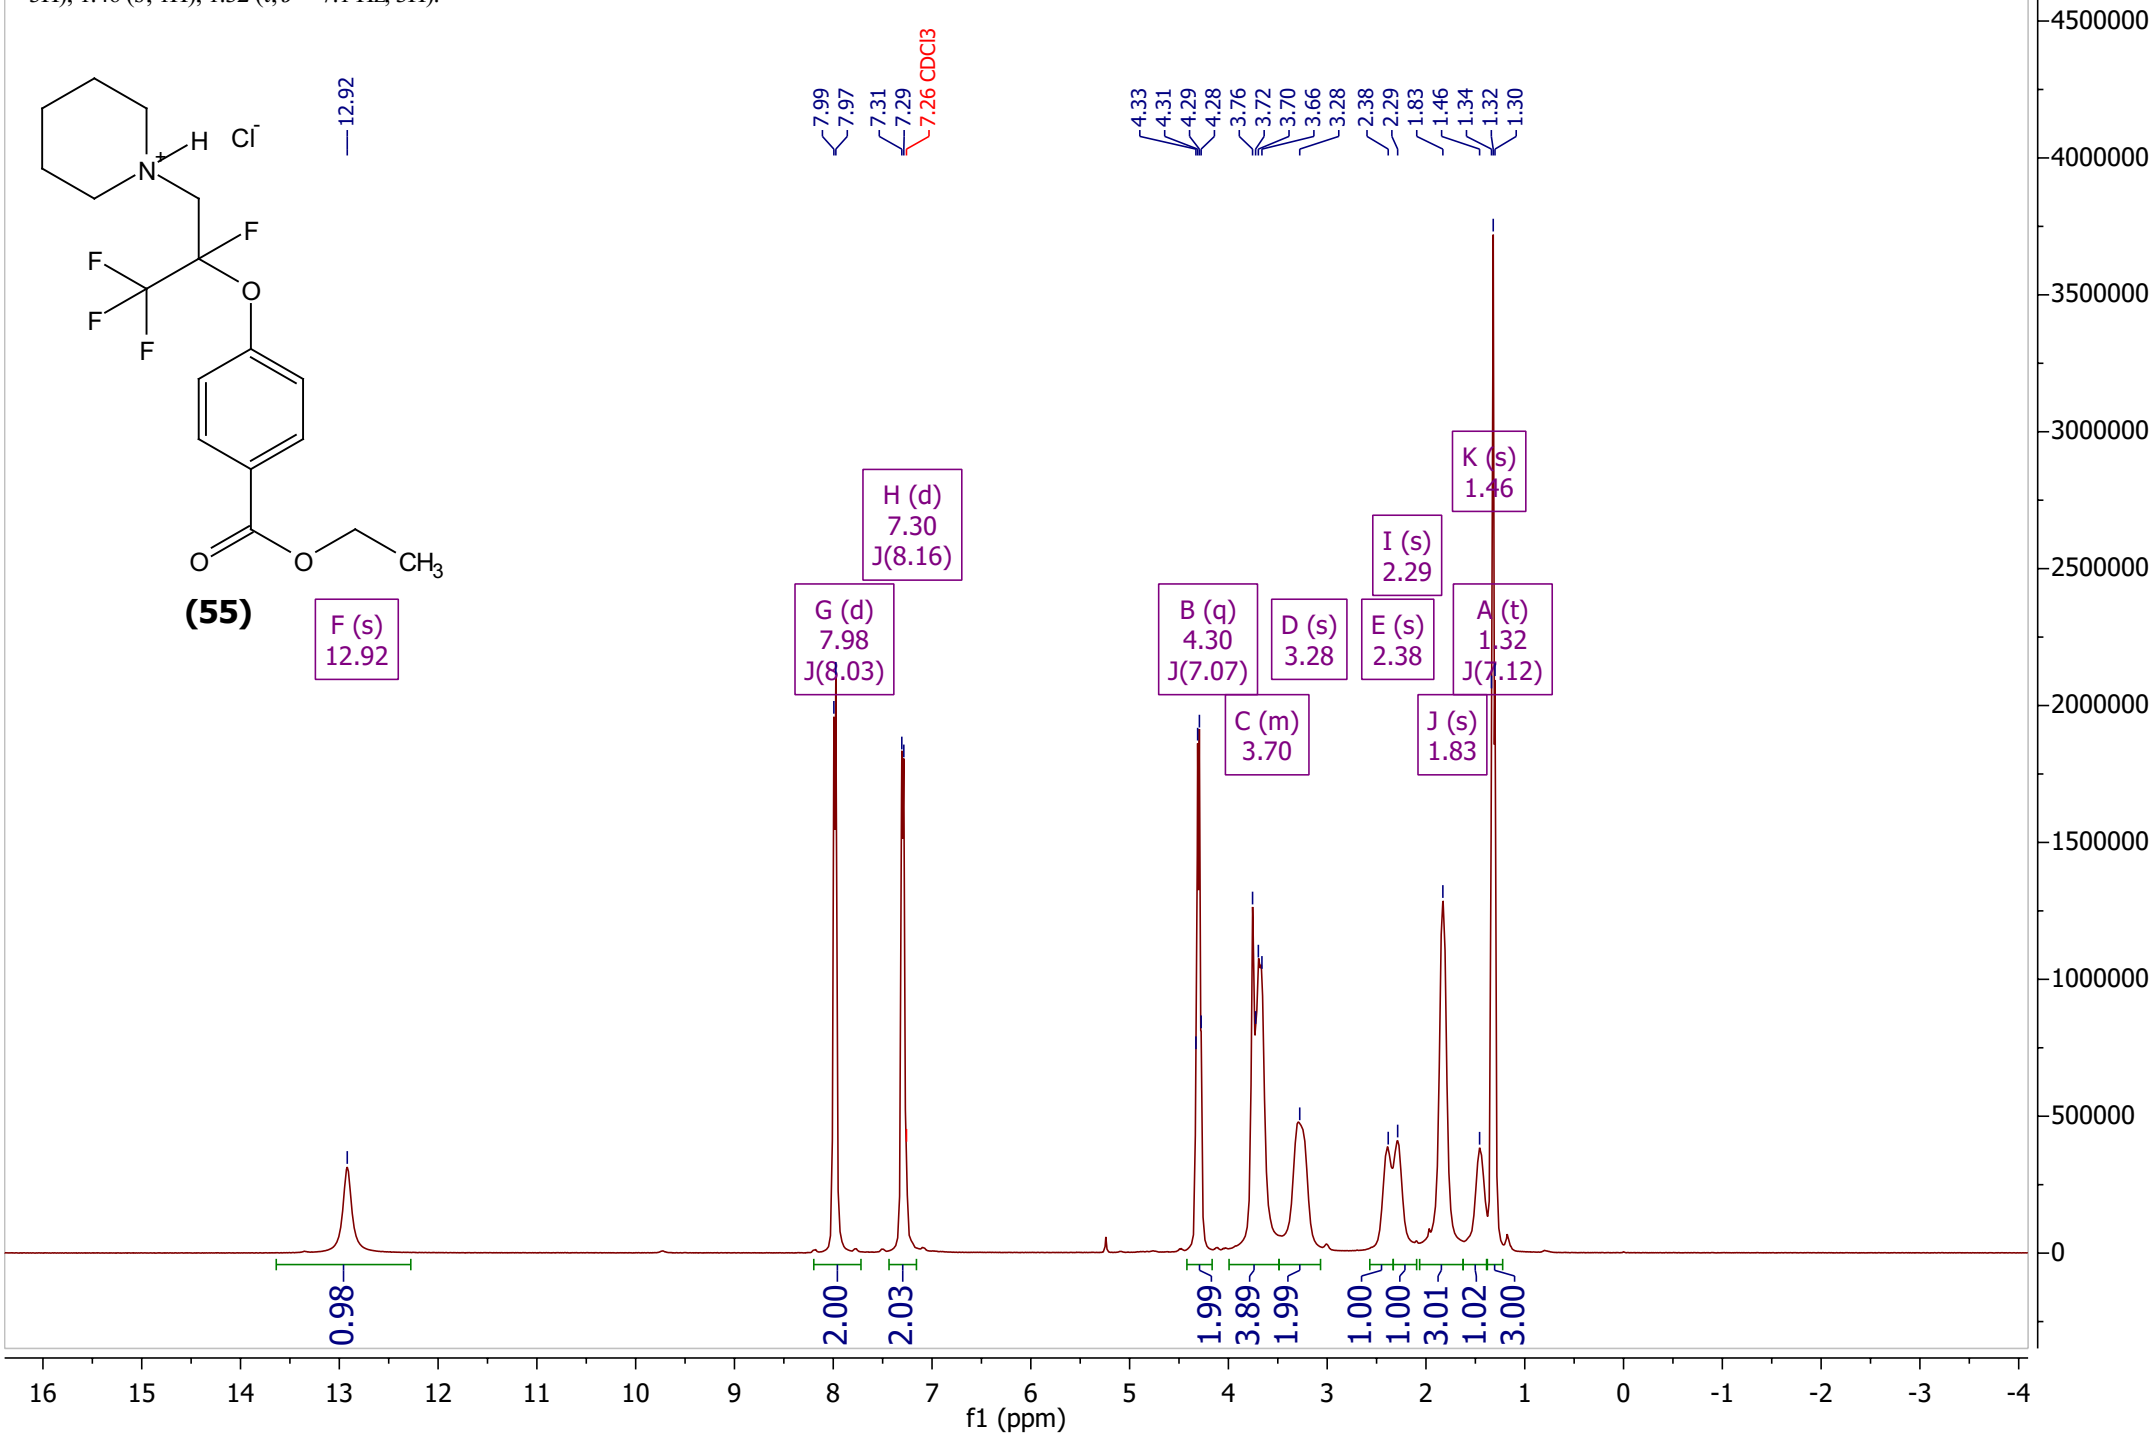

$^{19}\text{F}$  NMR (376 MHz, Chloroform-*d*)  $\delta$  -78.0, -119.1.

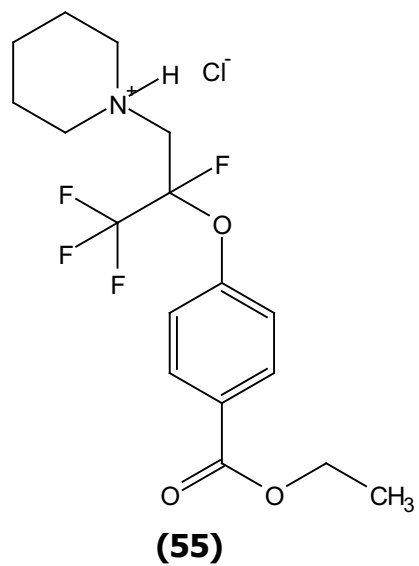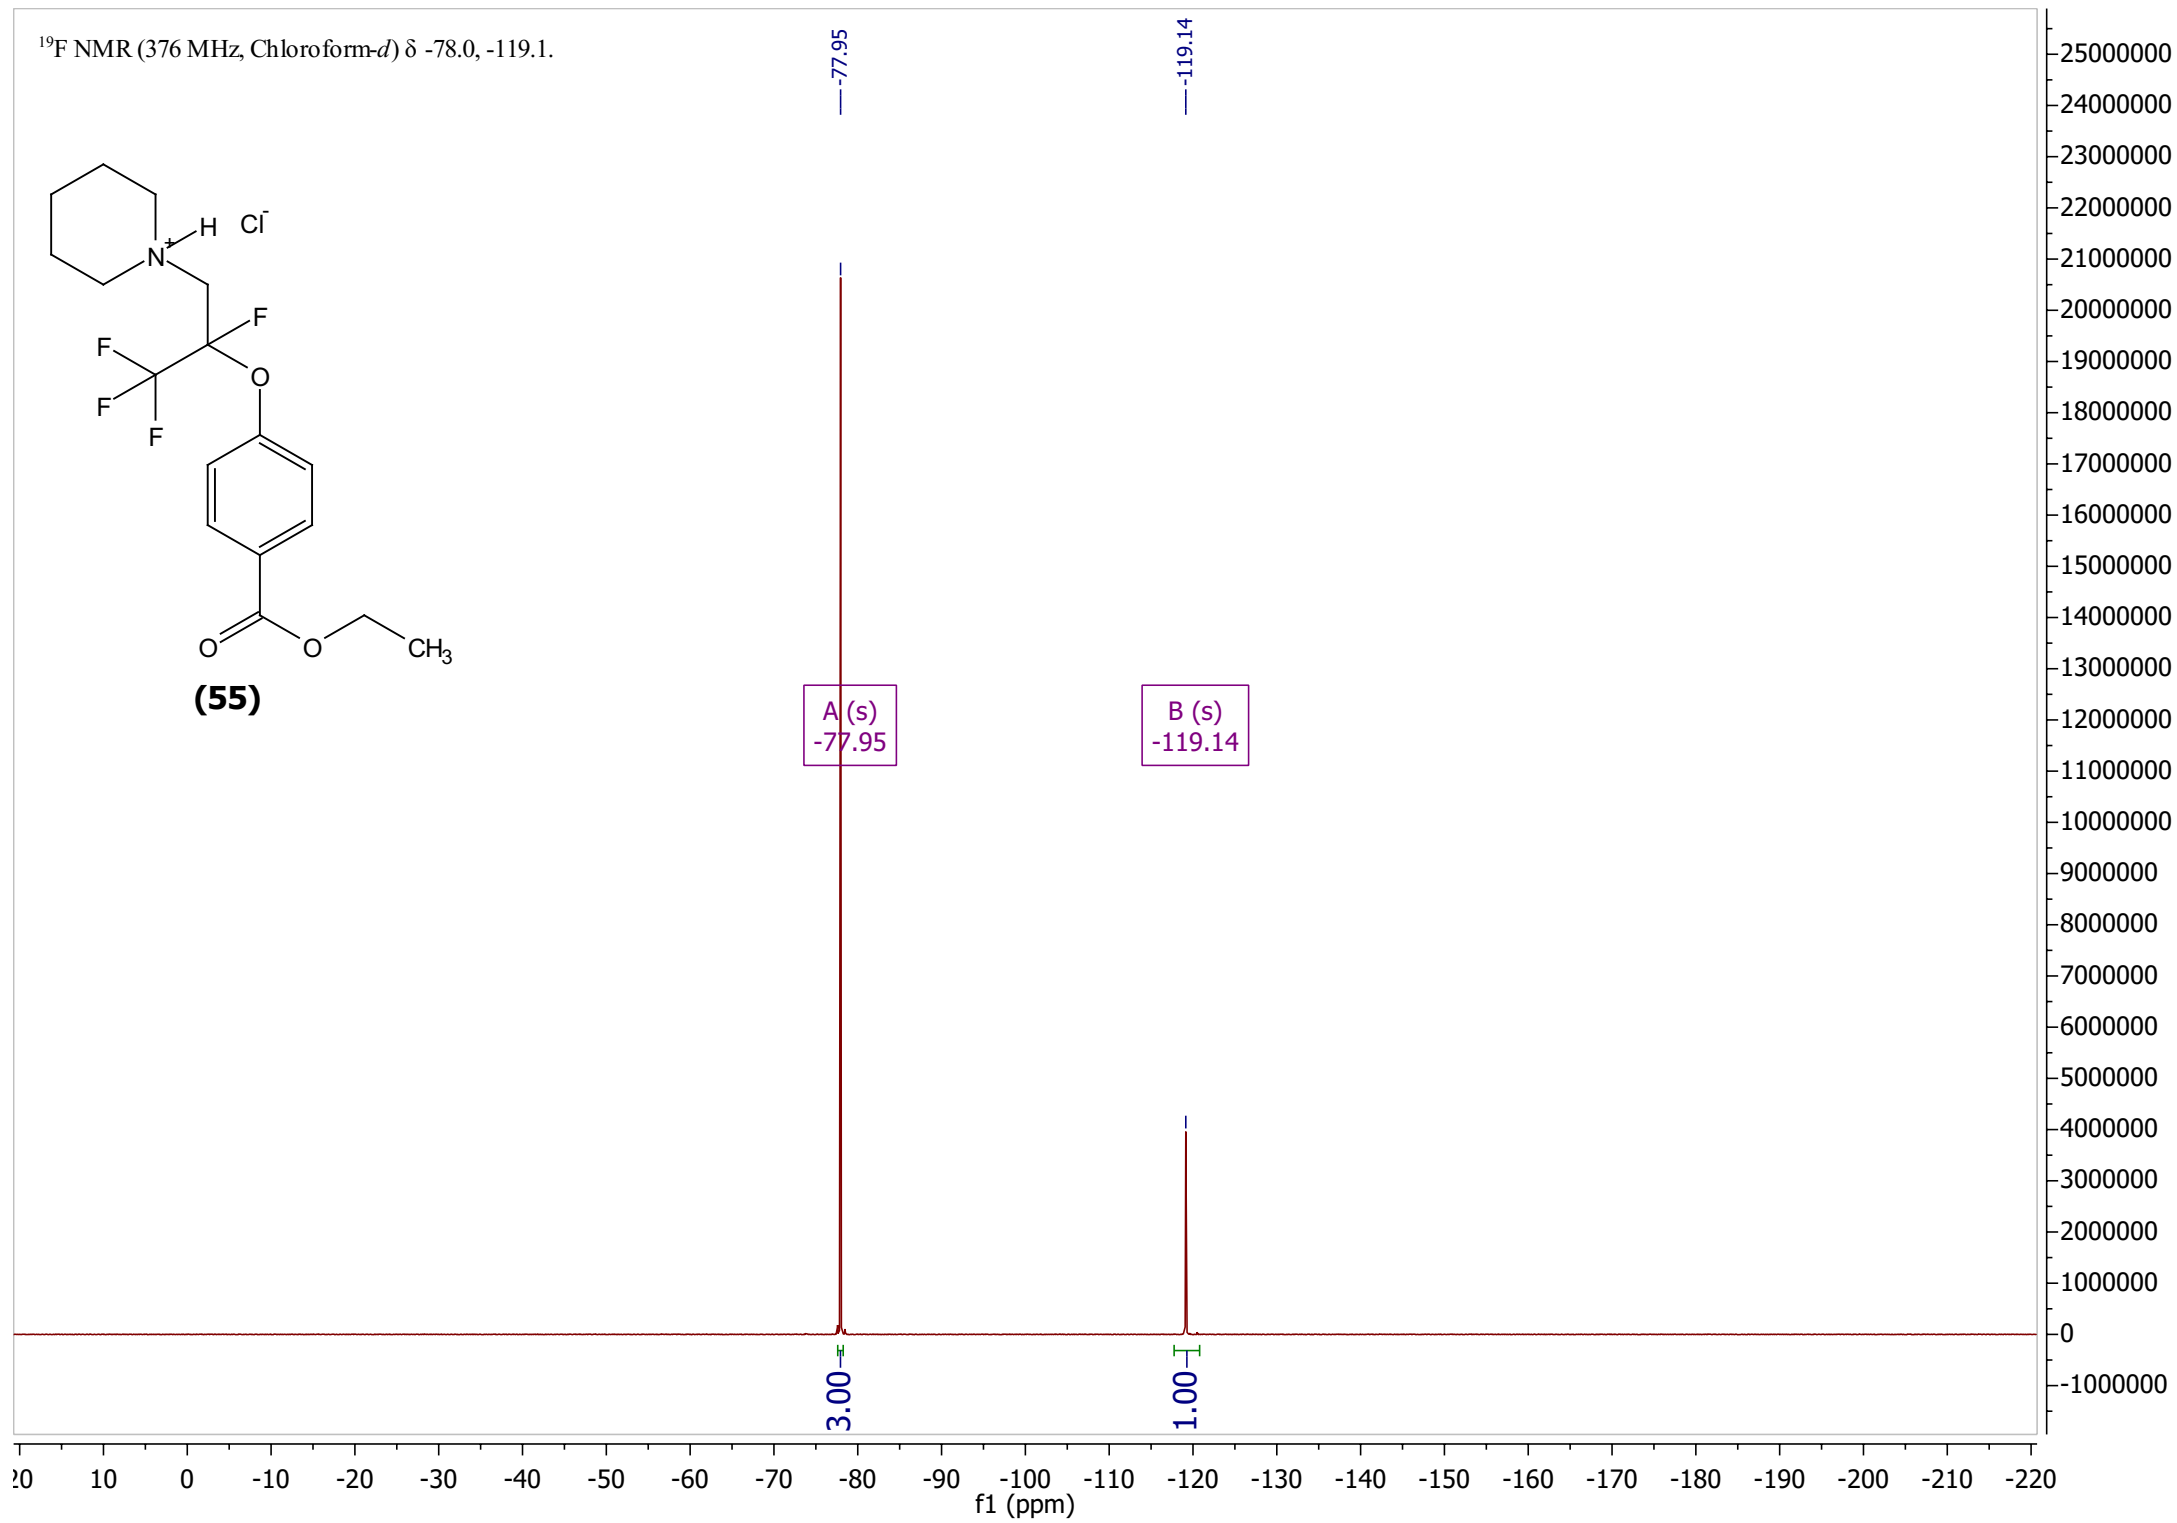

$^{13}\text{C}$  NMR (101 MHz, Chloroform-*d*)  $\delta$  165.4, 154.6, 131.4, 128.9, 121.7, 119.3 (dq,  $J = 291.7, 41.7$  Hz), 107.4 (qd,  $J = 243.9, 35.0$  Hz), 61.3, 56.0 (d,  $J = 21.8$  Hz), 54.8 (d,  $J = 14.7$  Hz), 22.7, 21.6, 14.3.

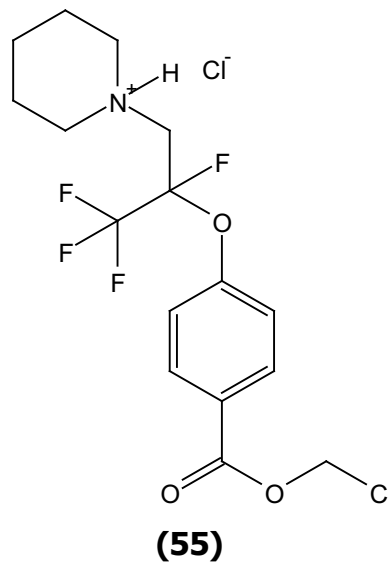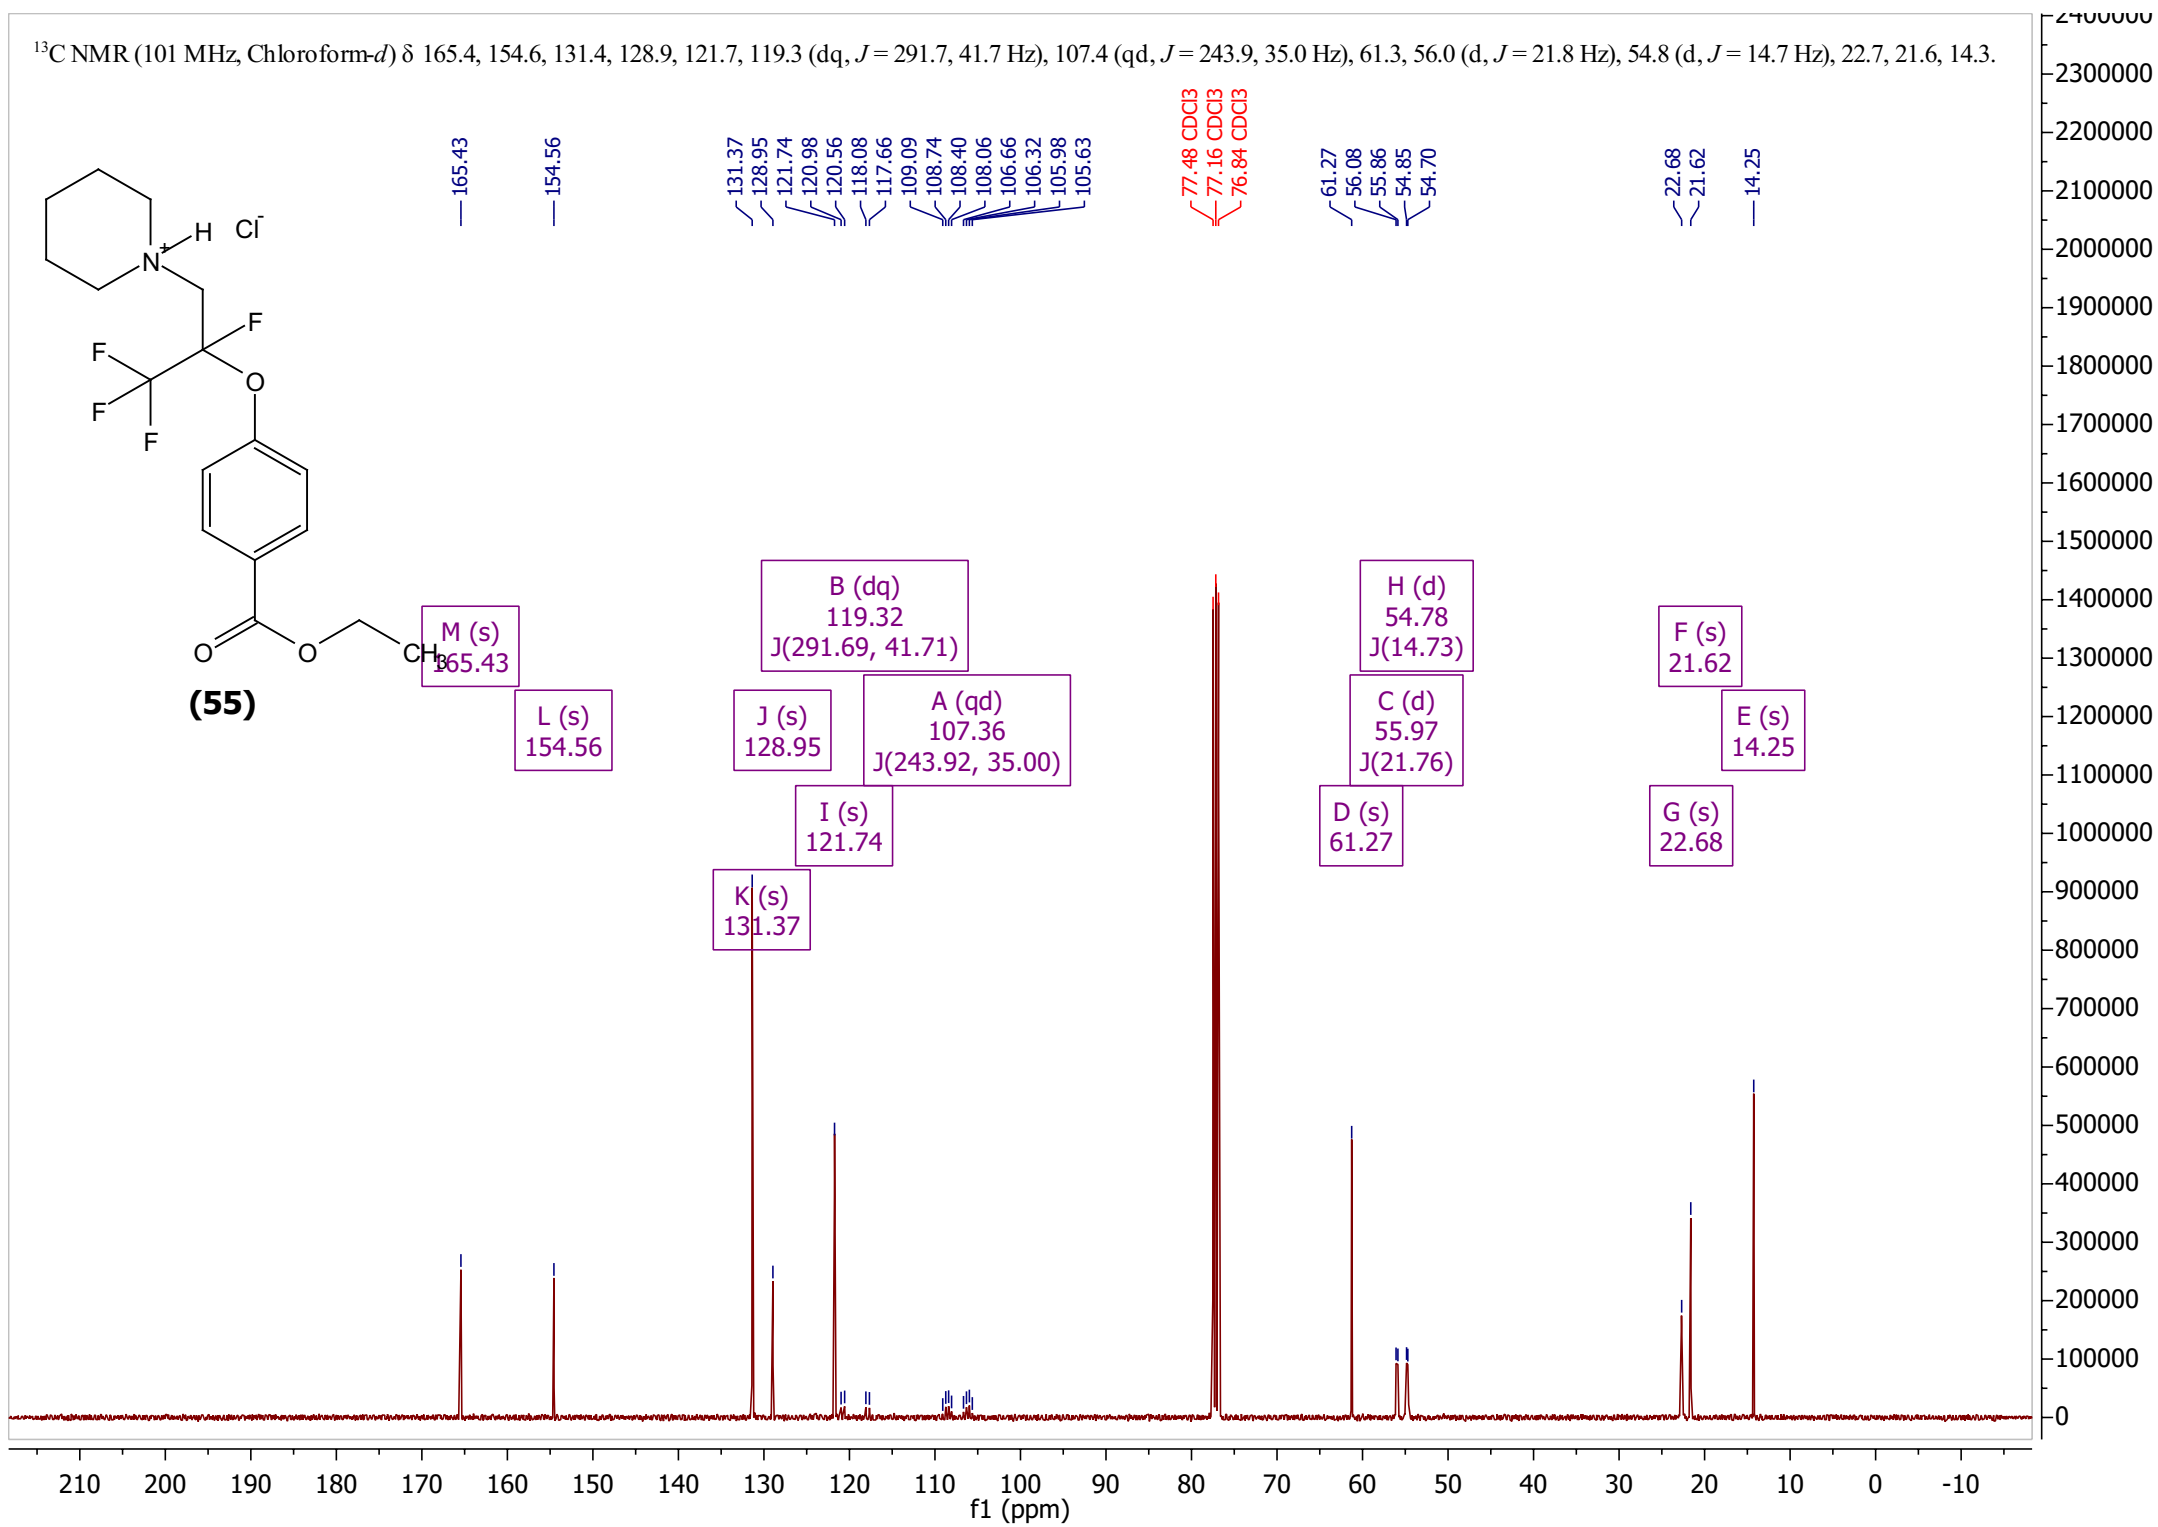

$^1\text{H}$  NMR (400 MHz, Chloroform-*d*)  $\delta$  8.08 (d,  $J = 4.8$  Hz, 1H), 7.96 (d,  $J = 8.3$  Hz, 2H), 7.79 (t,  $J = 8.0$  Hz, 1H), 7.15 (d,  $J = 8.3$  Hz, 2H), 6.93 (d,  $J = 9.0$  Hz, 1H), 6.79 (t,  $J = 6.5$  Hz, 1H), 5.24 (s, 3H), 4.29 (q,  $J = 7.1$  Hz, 2H), 3.73 – 3.70 (m, 4H), 2.99 (p,  $J = 14.7$  Hz, 2H), 2.69 (s, 4H), 1.32 (t,  $J = 7.1$  Hz, 3H).

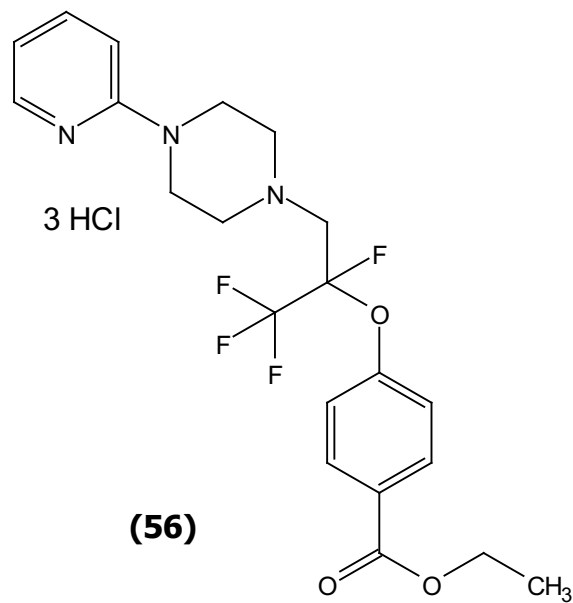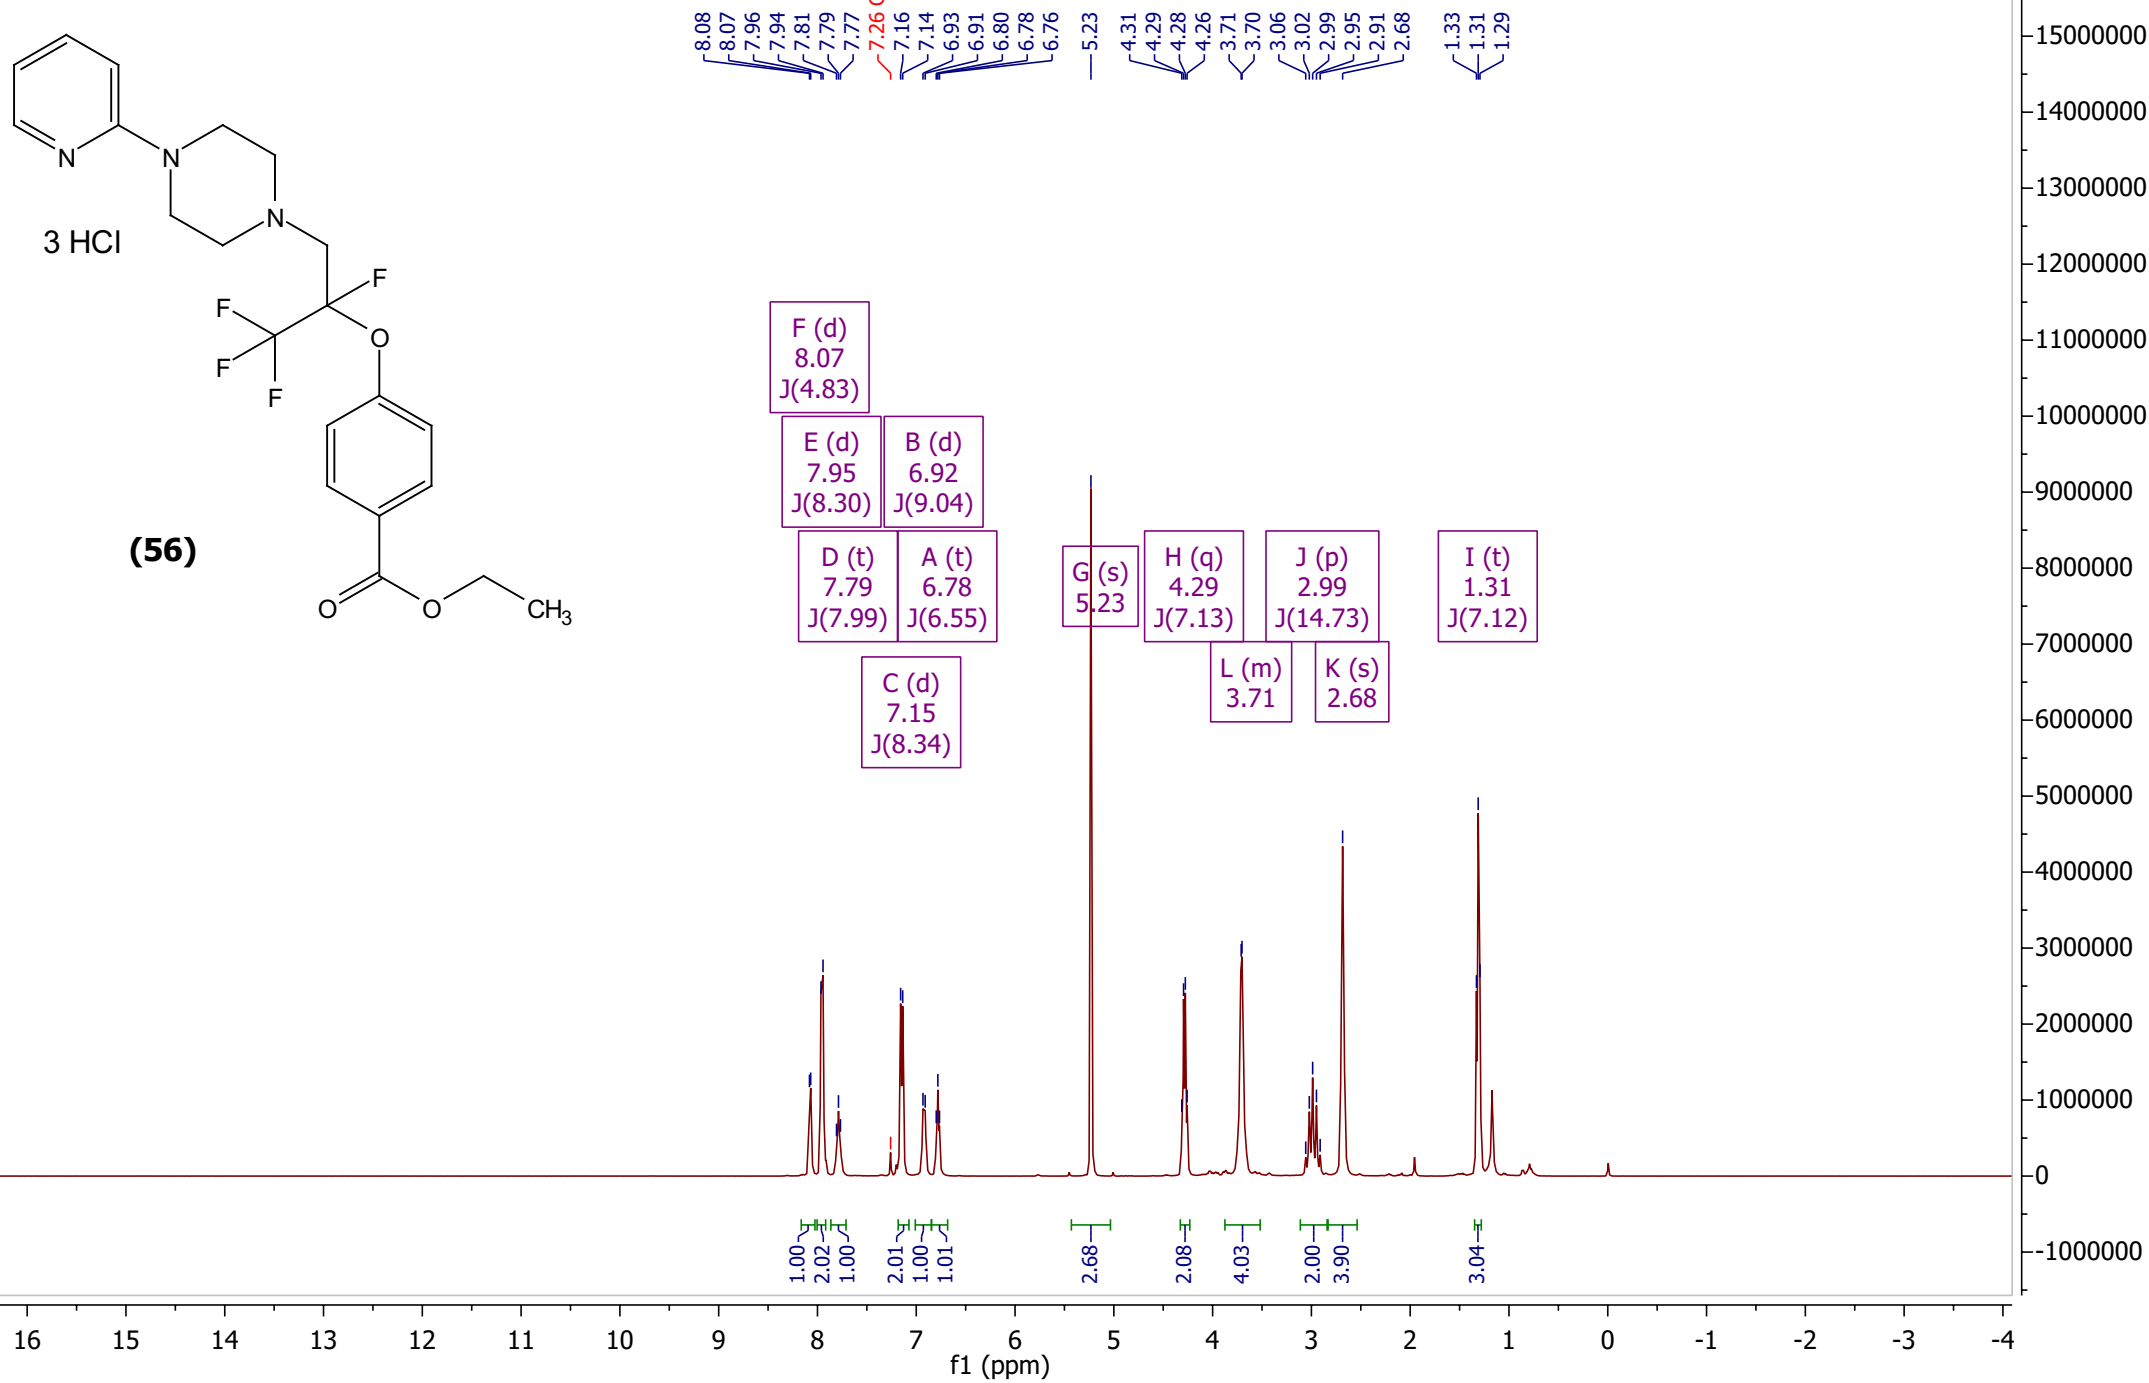

$^{19}\text{F}$  NMR (376 MHz, Chloroform-*d*)  $\delta$  -80.3, -122.5.

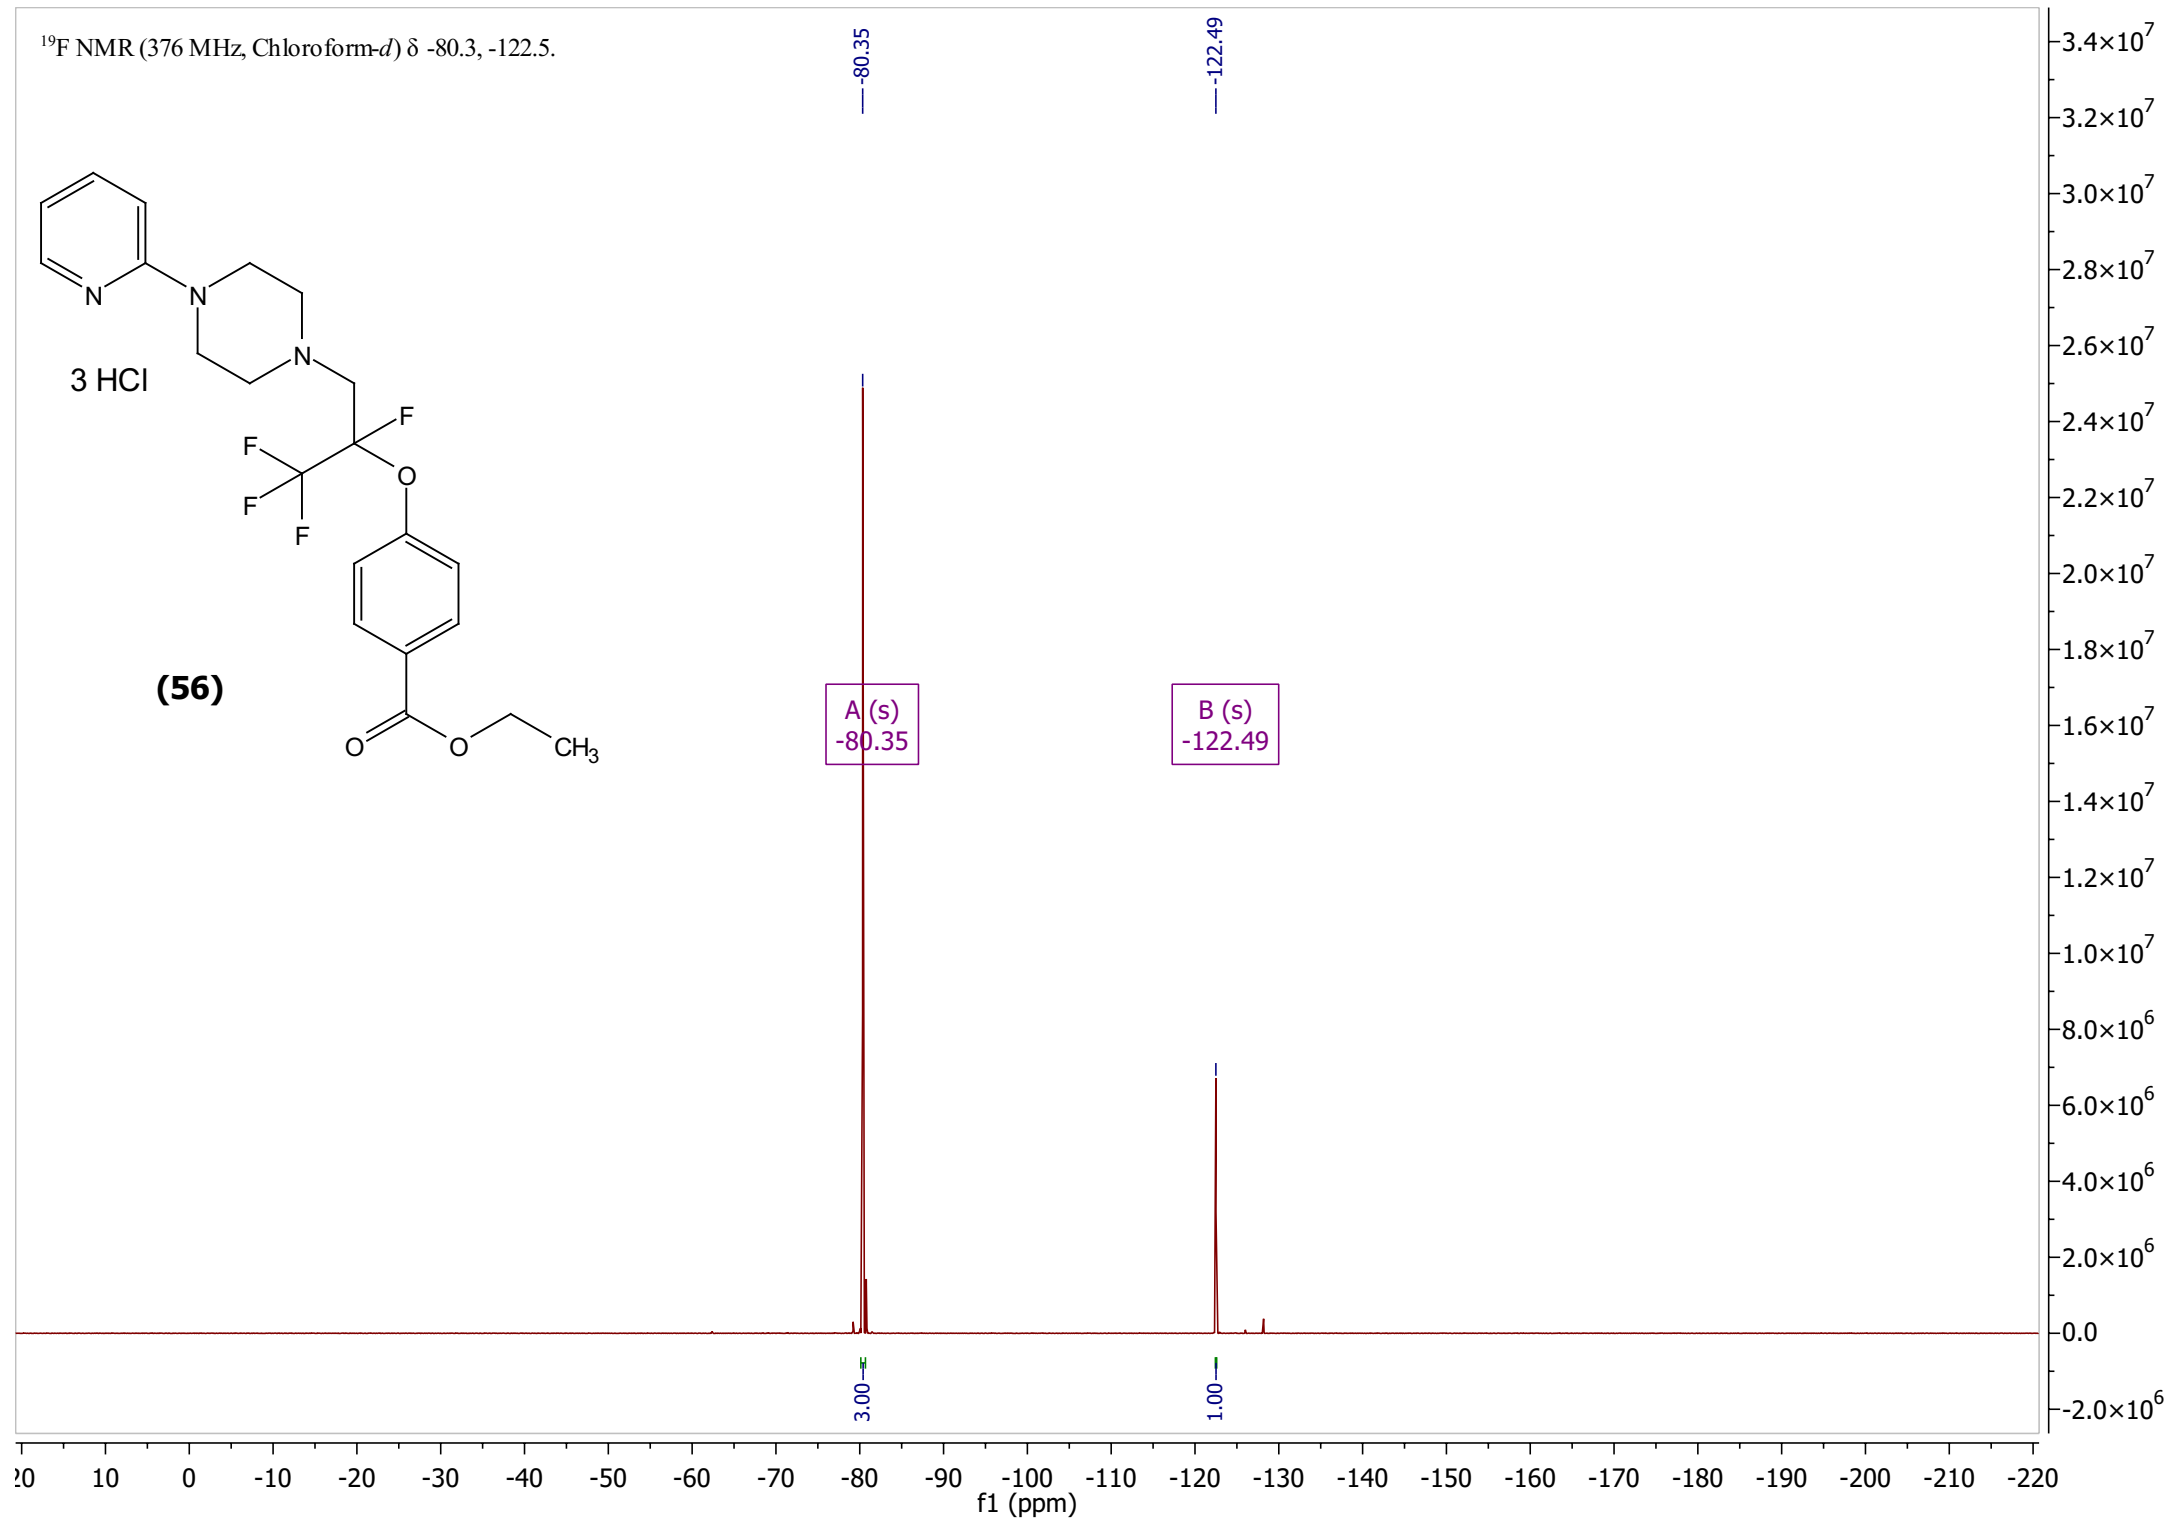



$^{13}\text{C}$  NMR (101 MHz, Chloroform- $d$ )  $\delta$  165.6, 155.7, 152.2, 143.6, 138.5, 131.2, 127.7, 121.4 (d,  $J = 2.6$  Hz), 120.2 (qd,  $J = 288.2, 36.9$  Hz), 112.6, 111.3, 109.2 (dq,  $J = 241.3, 33.0$  Hz), 61.1, 57.3 (d,  $J = 26.2$  Hz), 53.5, 53.0, 47.0, 14.2.

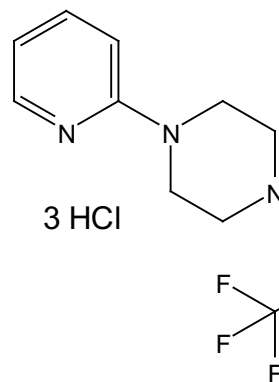

(56)

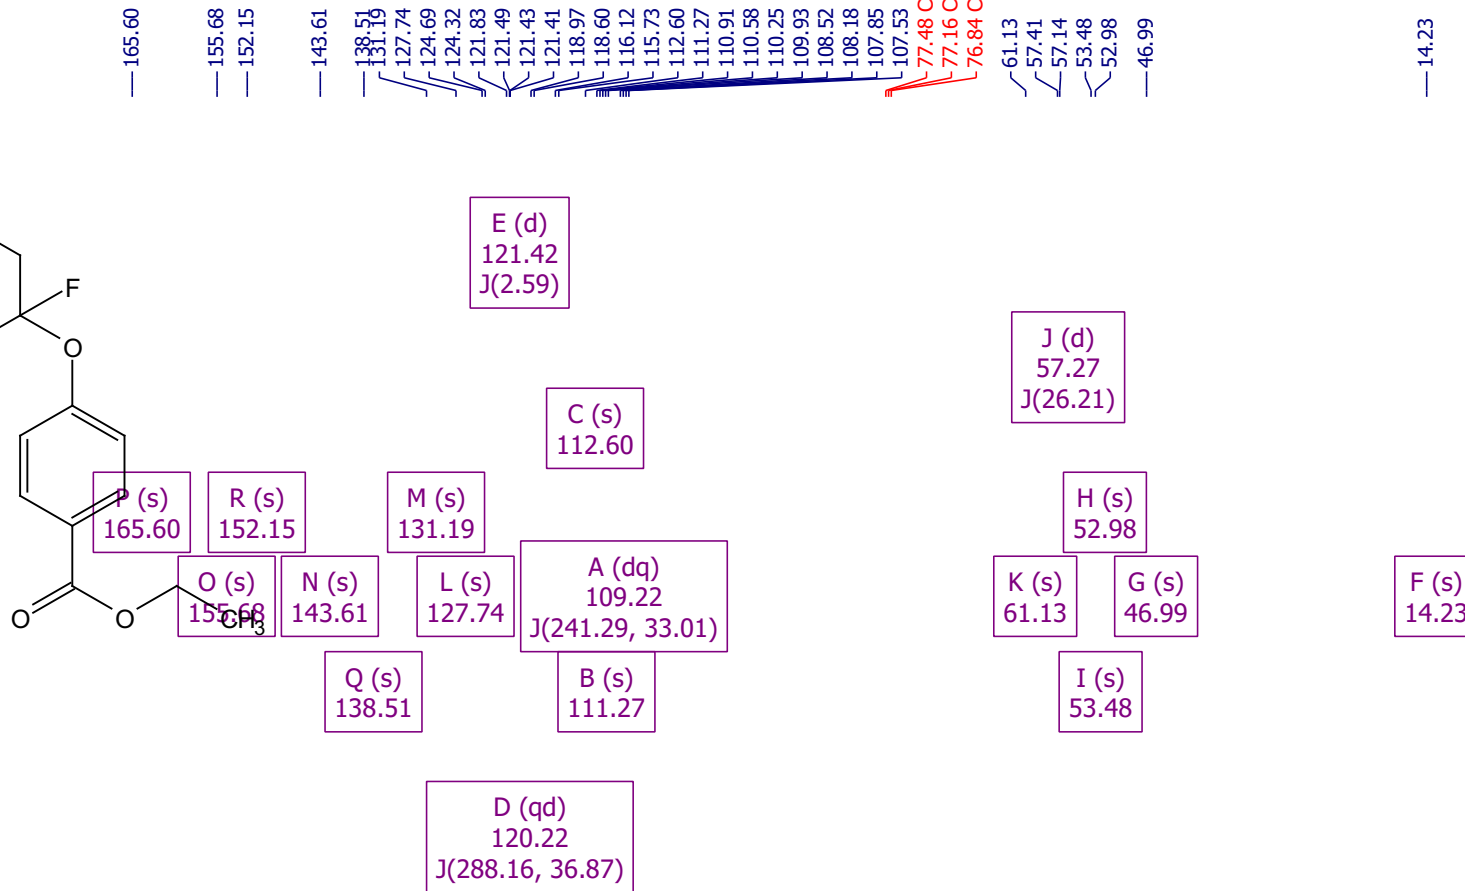

210 200 190 180 170 160 150 140 130 120 110 100 90 80 70 60 50 40 30 20 10 0 -10  
f1 (ppm)

$^1\text{H}$  NMR (400 MHz, Chloroform-*d*)  $\delta$  8.32 – 8.25 (m, 1H), 8.02 (d,  $J = 8.9$  Hz, 2H), 7.89 – 7.76 (m, 2H), 7.49 (dd,  $J = 6.6, 3.1$  Hz, 2H), 7.44 – 7.37 (m, 2H), 7.21 (d,  $J = 7.9$  Hz, 2H), 4.39 (q,  $J = 7.1$  Hz, 2H), 4.07 (s, 2H), 3.32 – 3.10 (m, 2H), 2.36 (s, 3H), 1.41 (t,  $J = 7.2$  Hz, 3H).

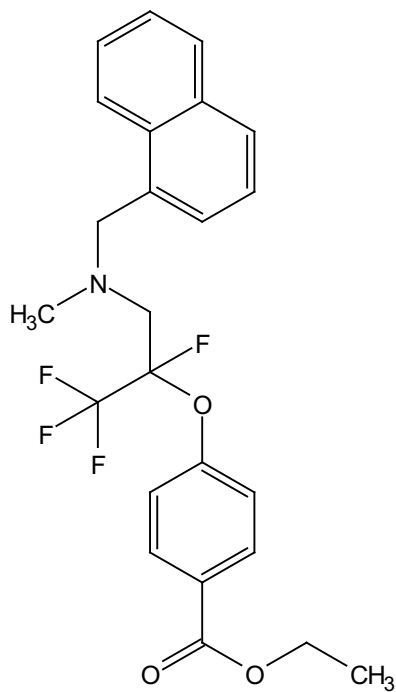

**(57)**

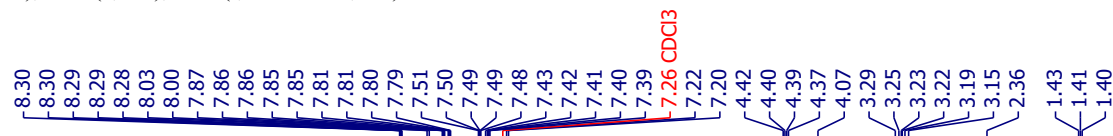

I (dd)  
7.49  
J(6.62, 3.12)

G (d)  
8.02  
J(8.85)

F (m)  
8.29

J (m)  
7.40

H (m)  
7.83

K (d)  
7.21  
J(7.88)

D (q)  
4.39  
J(7.13)

E (s)  
4.07

C (m)  
3.21

B (s)  
2.36

A (t)  
1.41  
J(7.16)

1.00  
2.06  
2.15  
2.07  
2.05  
2.02

2.12  
2.01

2.12

3.00

3.08

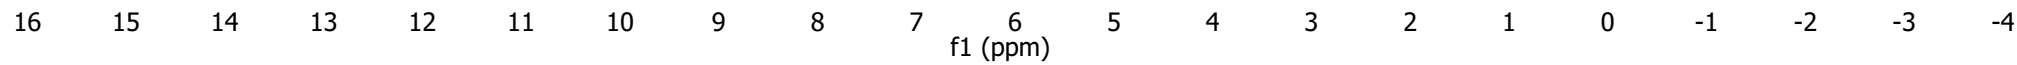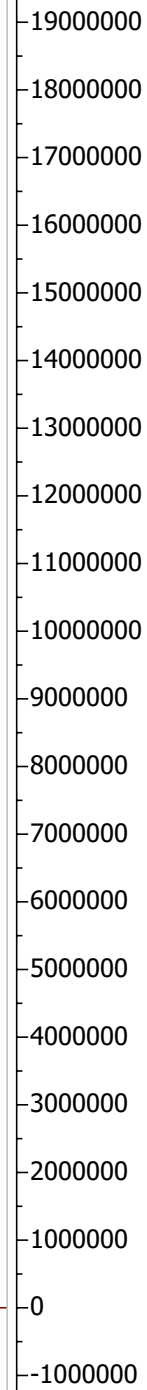

$^{19}\text{F}$  NMR (376 MHz, Chloroform-*d*)  $\delta$  -79.9 (d,  $J = 2.0$  Hz), -123.4 (q,  $J = 2.1$  Hz).

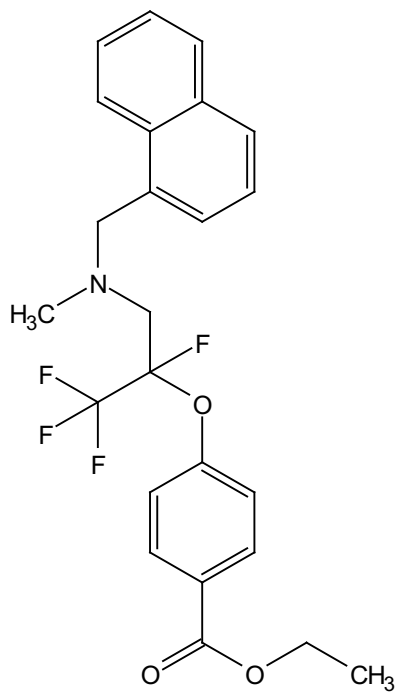

**(57)**

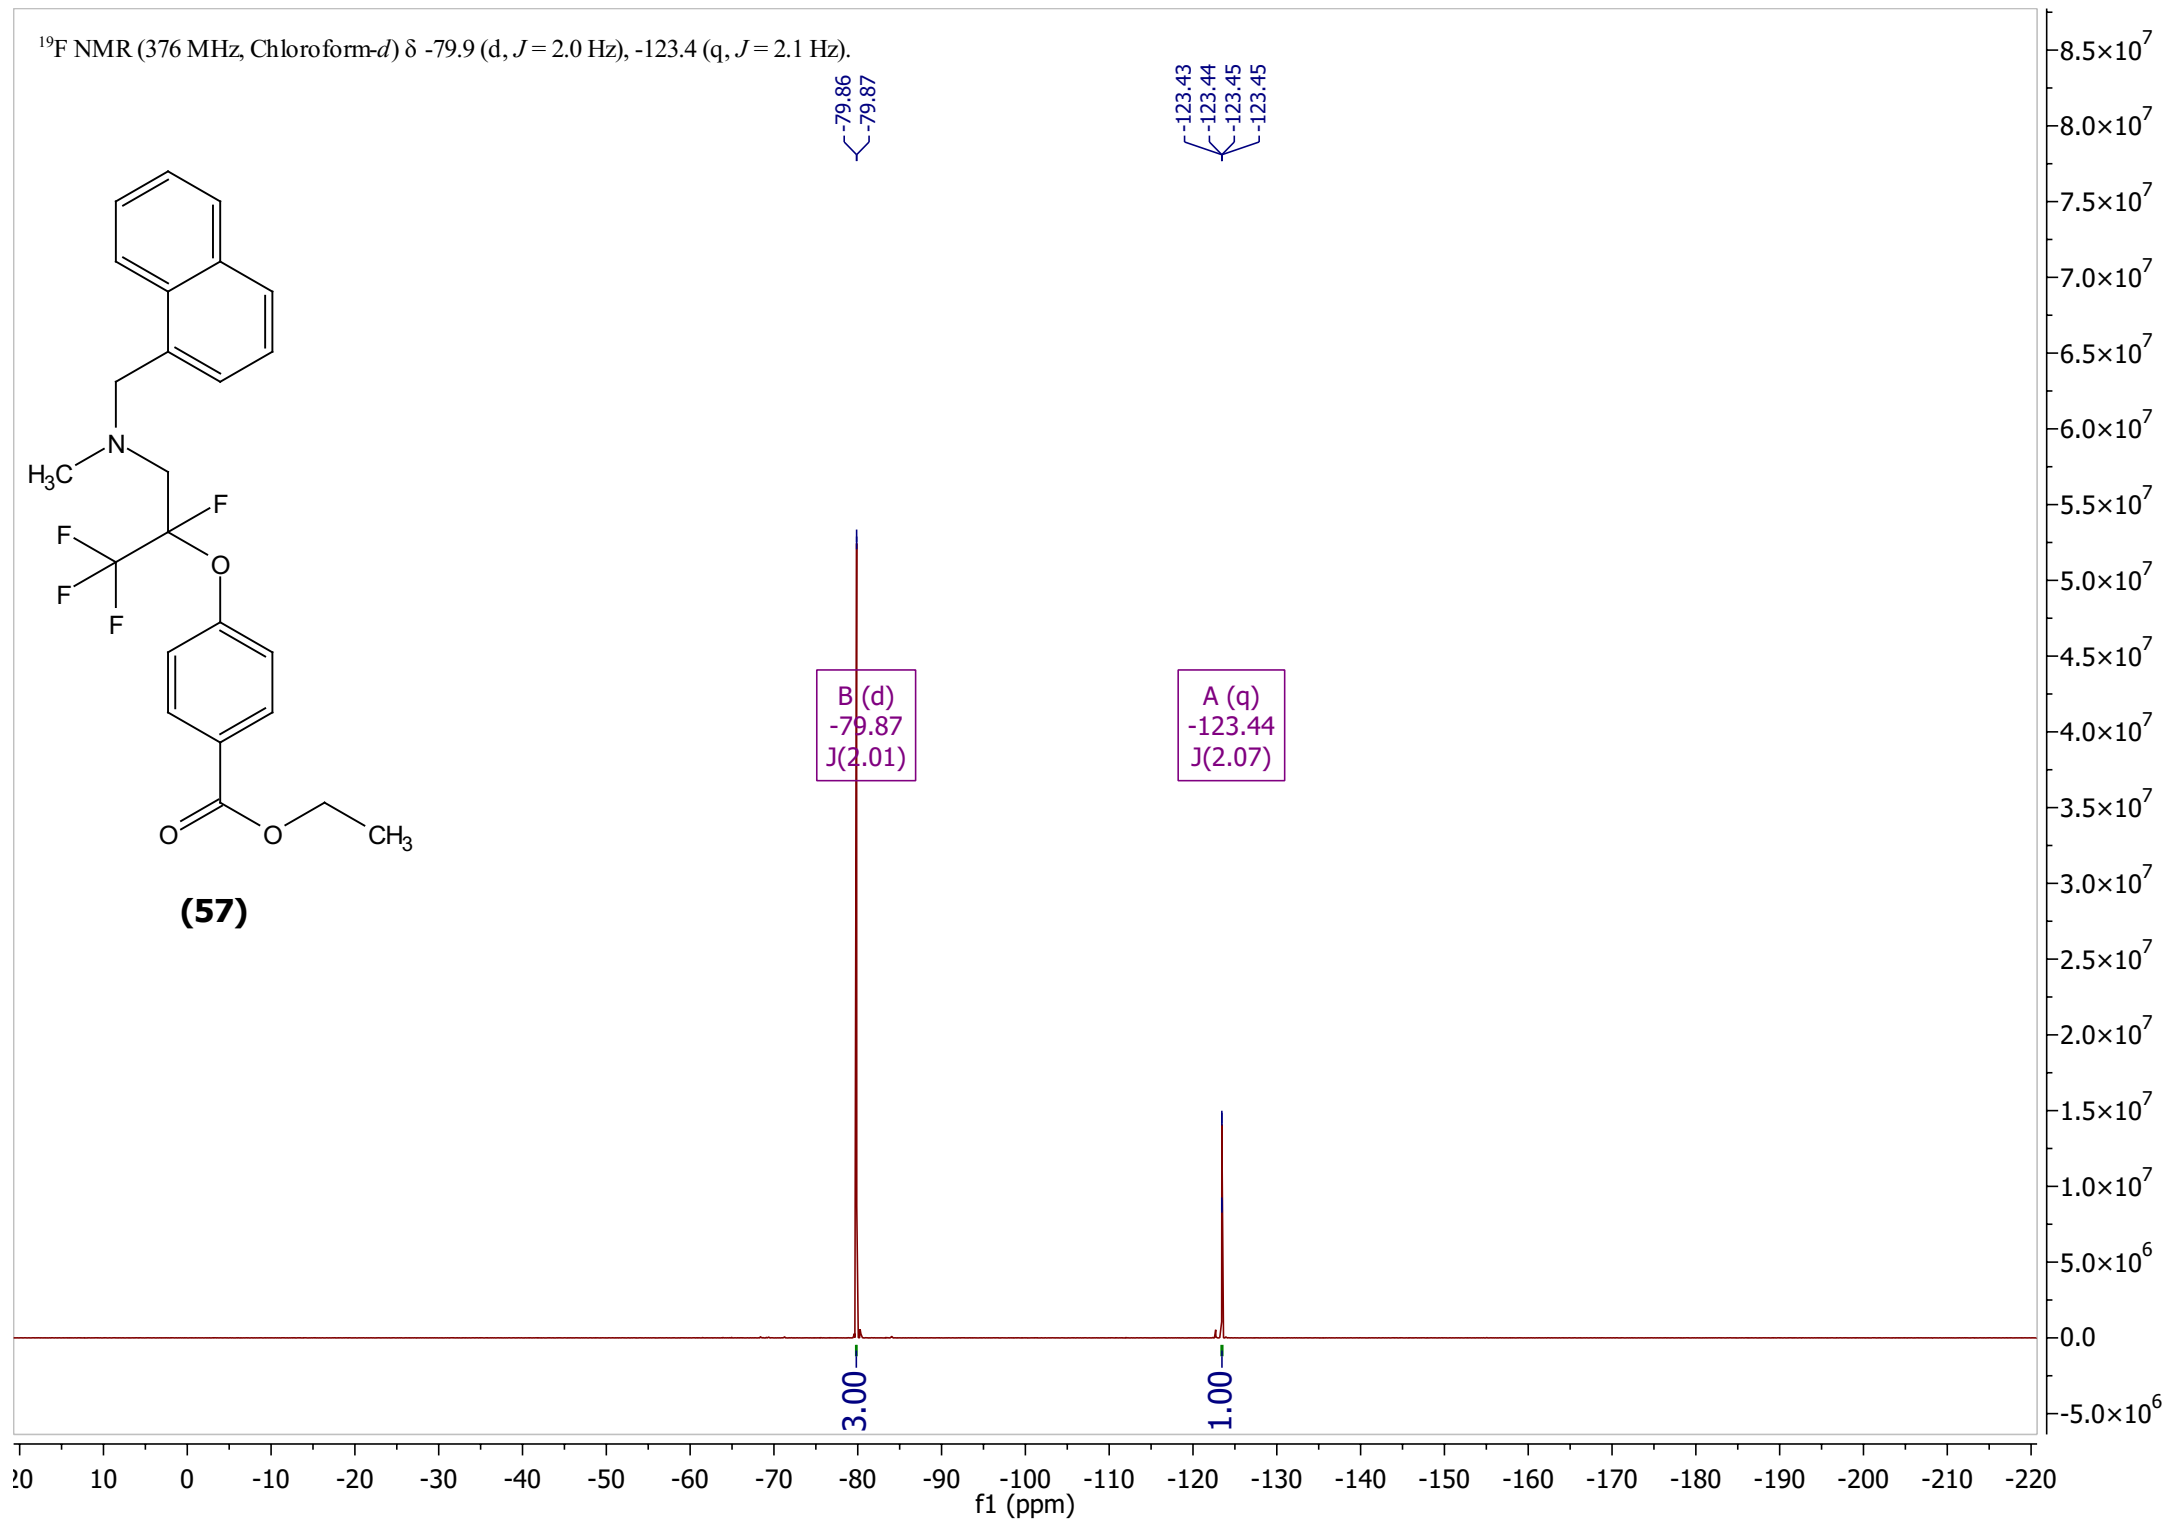

$^{13}\text{C}$  NMR (101 MHz, Chloroform-*d*)  $\delta$  165.9, 155.9, 134.0, 133.9, 132.4, 131.3, 128.5, 128.4, 127.6, 127.5, 125.9, 125.8, 125.2, 124.7, 121.6 (d,  $J = 2.7$  Hz), 120.6 (qd,  $J = 288.5, 38.1$  Hz), 110.0 (dq,  $J = 241.3, 32.3$  Hz), 61.8, 61.2, 57.6 (d,  $J = 25.1$  Hz), 43.6 (d,  $J = 1.9$  Hz), 14.4.

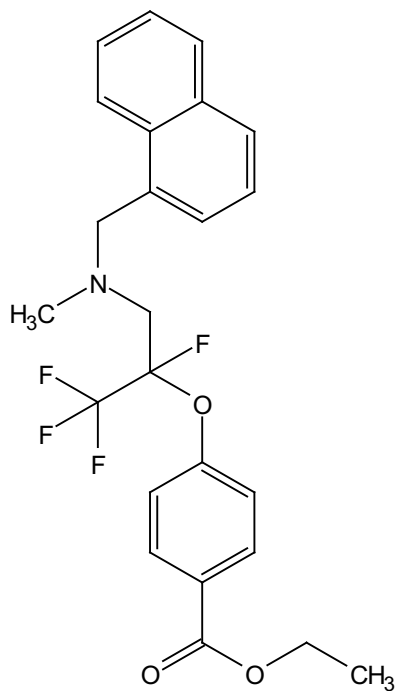

**(57)**

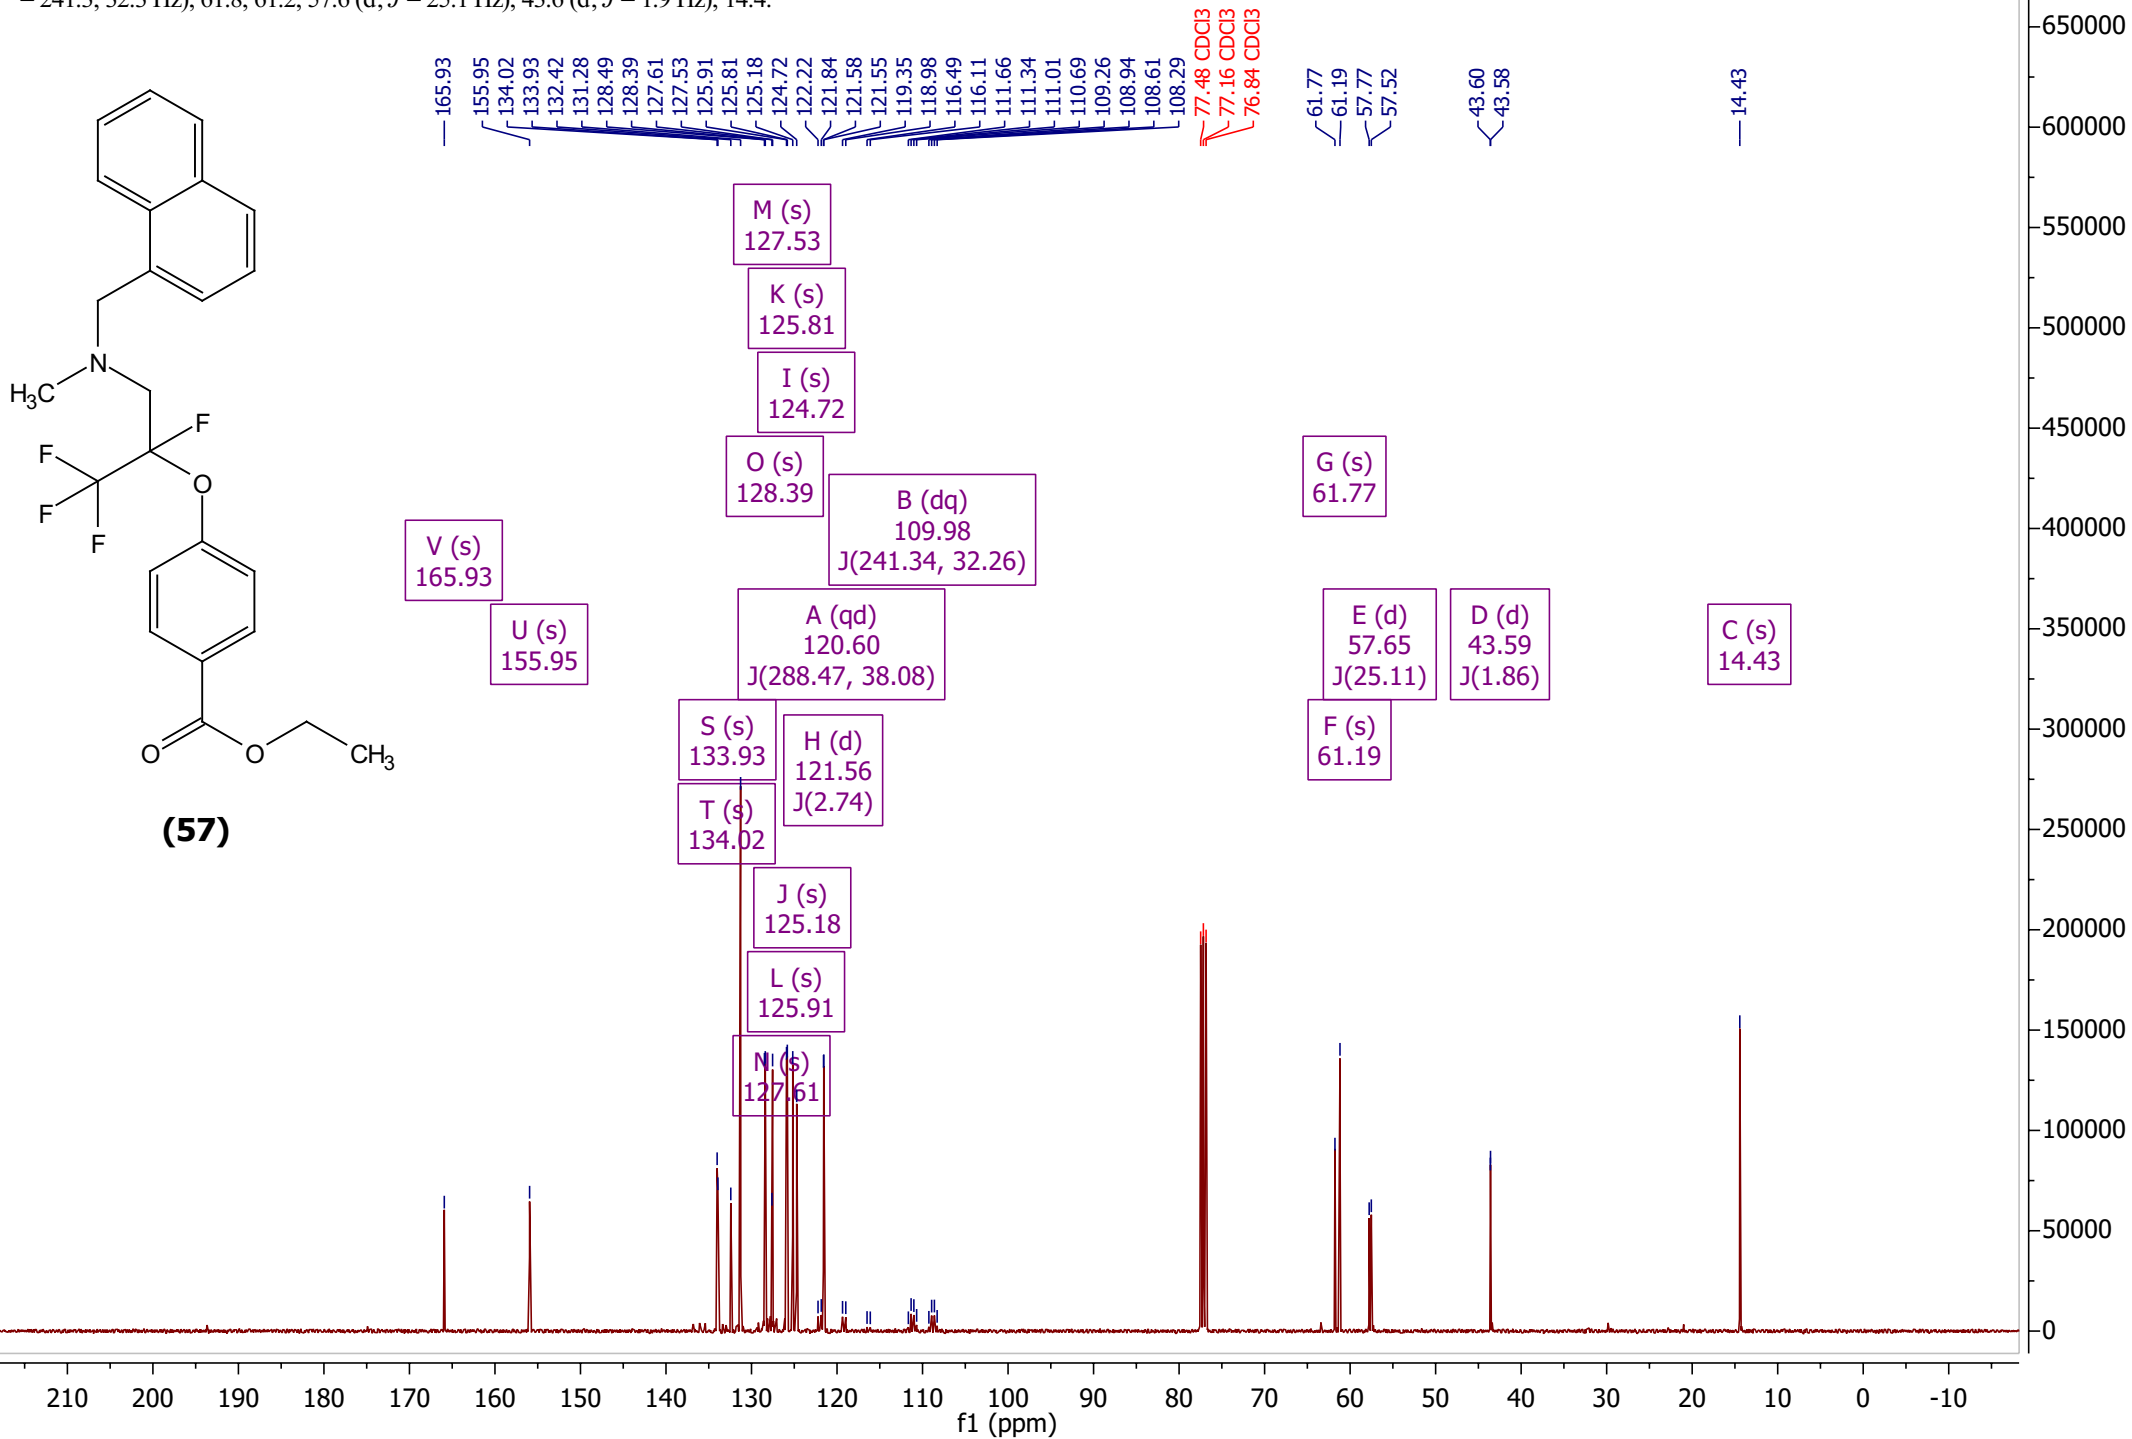

<sup>1</sup>H NMR (400 MHz, Chloroform-*d*) δ 7.95 (d, *J* = 8.7 Hz, 2H), 7.22 – 7.17 (m, 2H), 7.15 – 7.09 (m, 3H), 7.08 – 7.00 (m, 2H), 4.29 (q, *J* = 7.1 Hz, 2H), 3.88 (q, *J* = 7.9 Hz, 2H), 3.82 – 3.68 (m, 3H), 3.29 – 3.12 (m, 2H), 3.00 – 2.85 (m, 2H), 2.72 – 2.60 (m, 2H), 1.35 (s, 9H), 1.31 (t, *J* = 7.2 Hz, 3H).

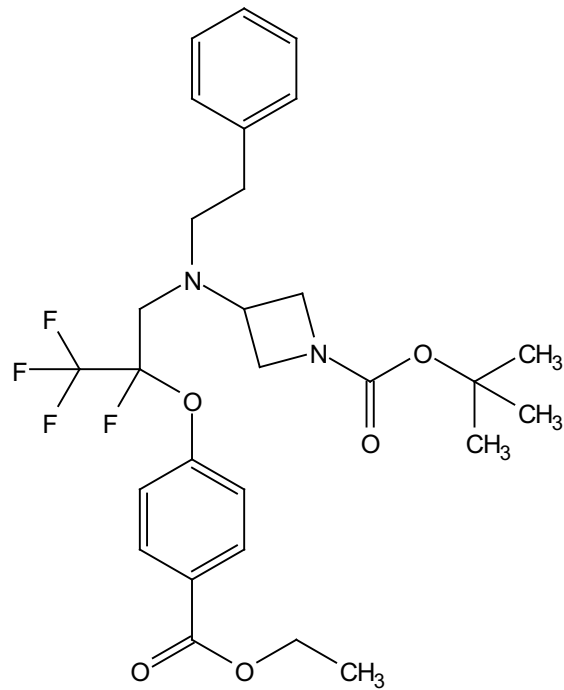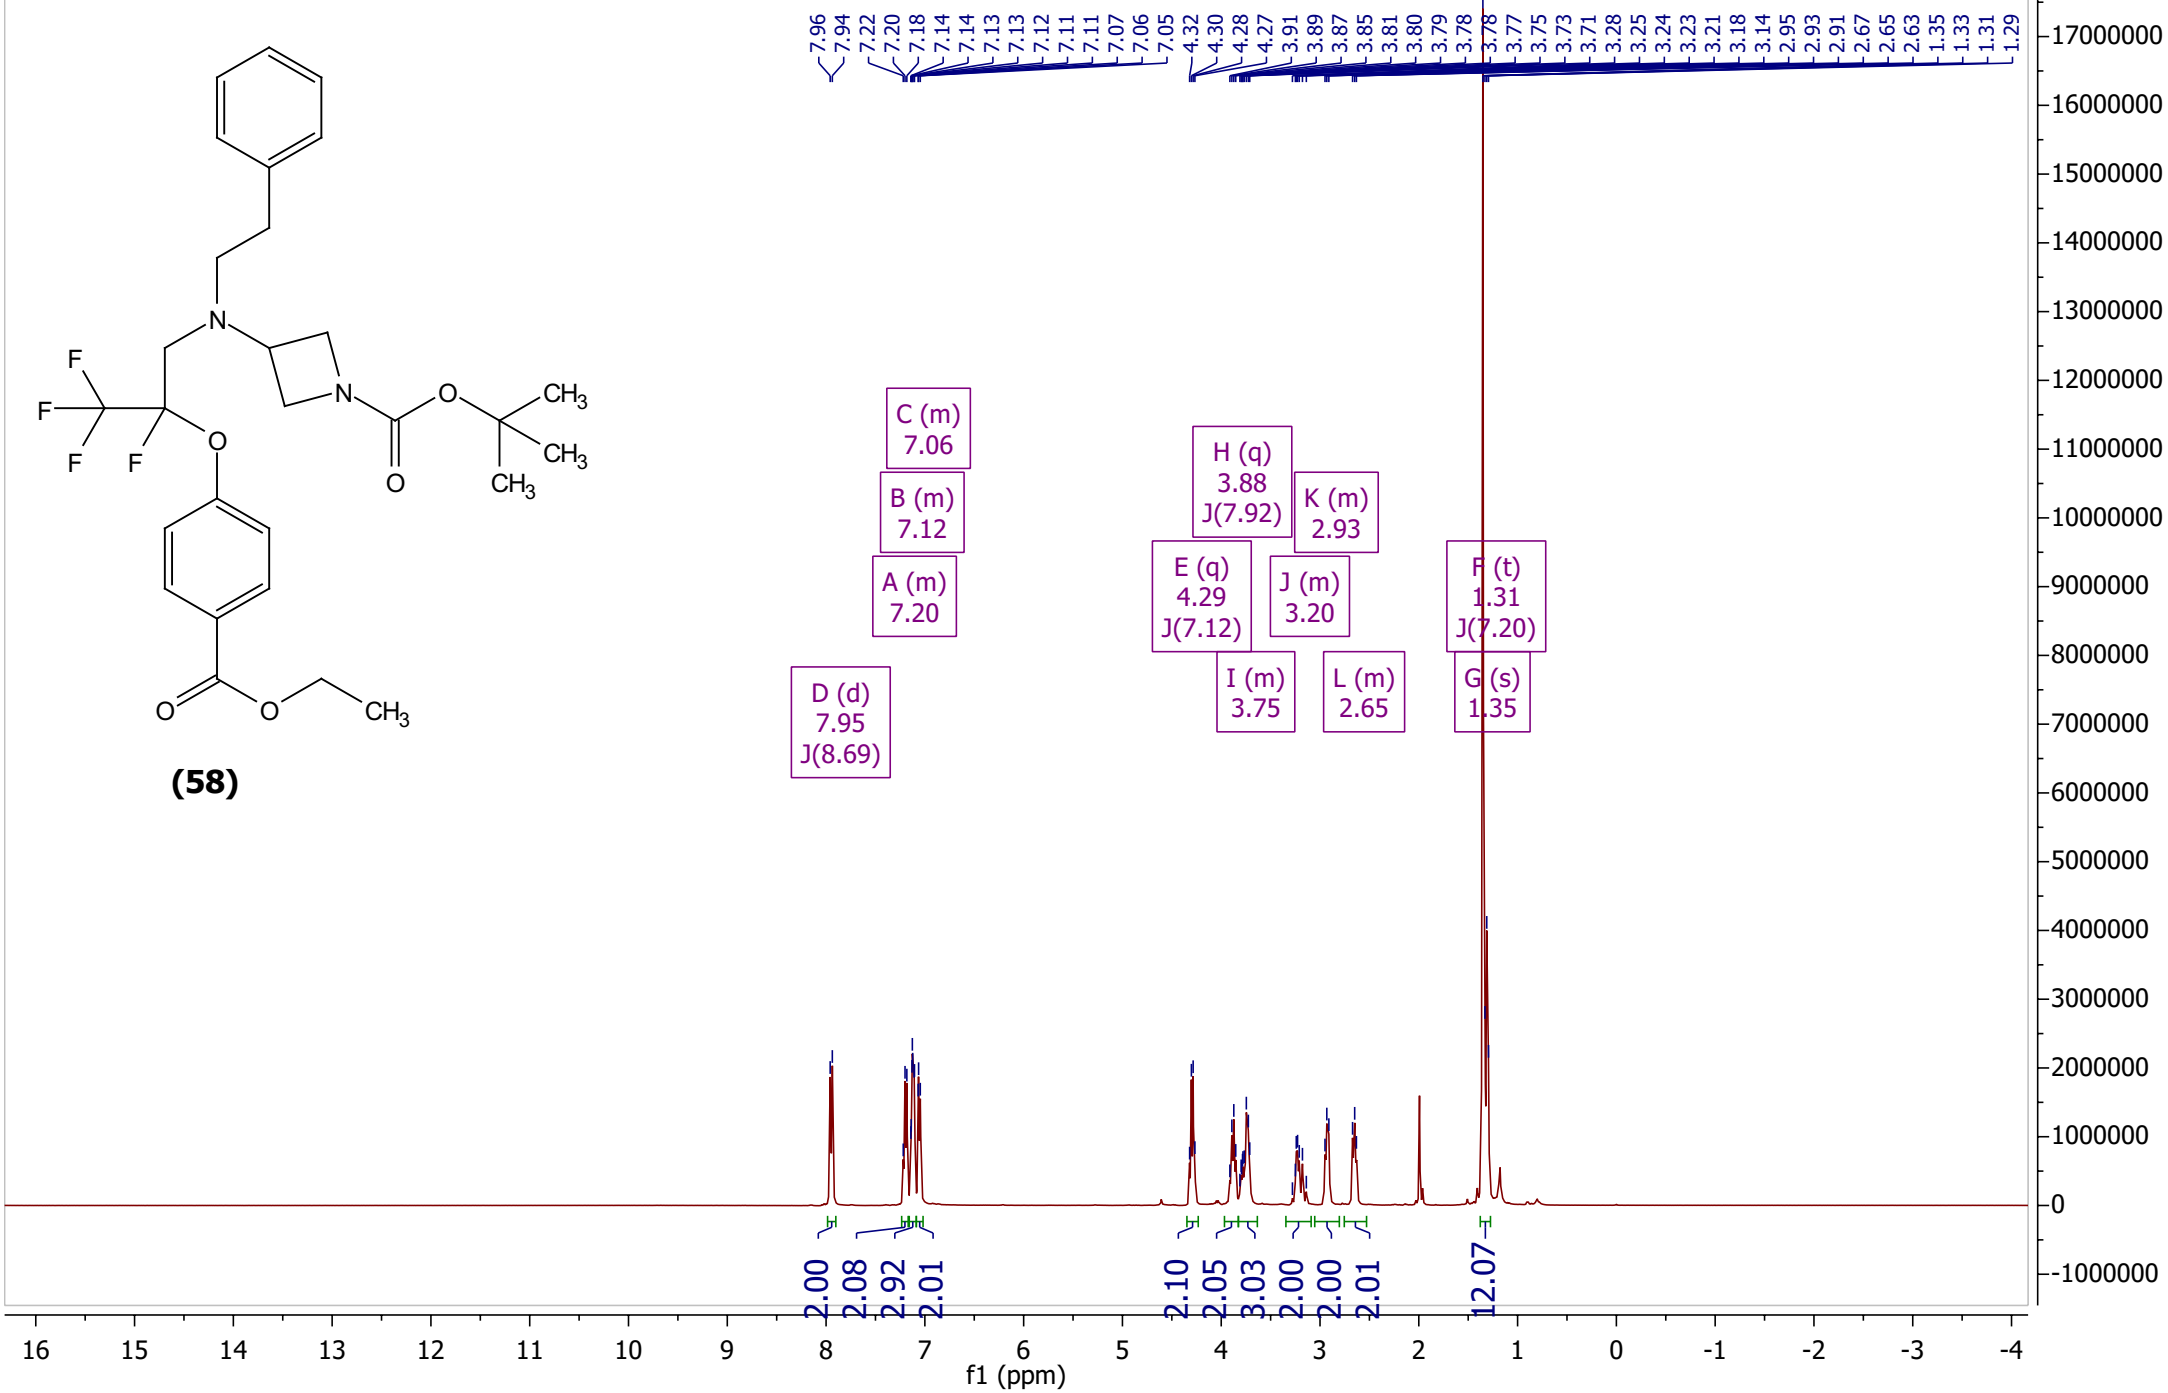

$^{19}\text{F}$  NMR (376 MHz, Chloroform-*d*)  $\delta$  -79.1, -126.2.

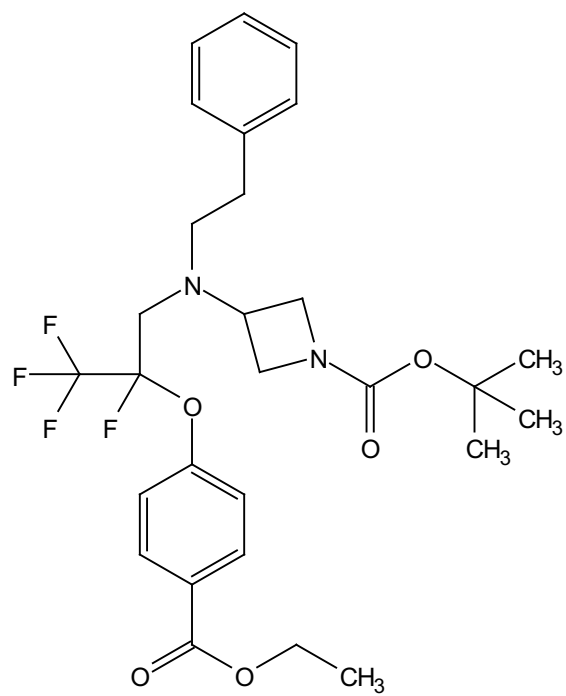

**(58)**

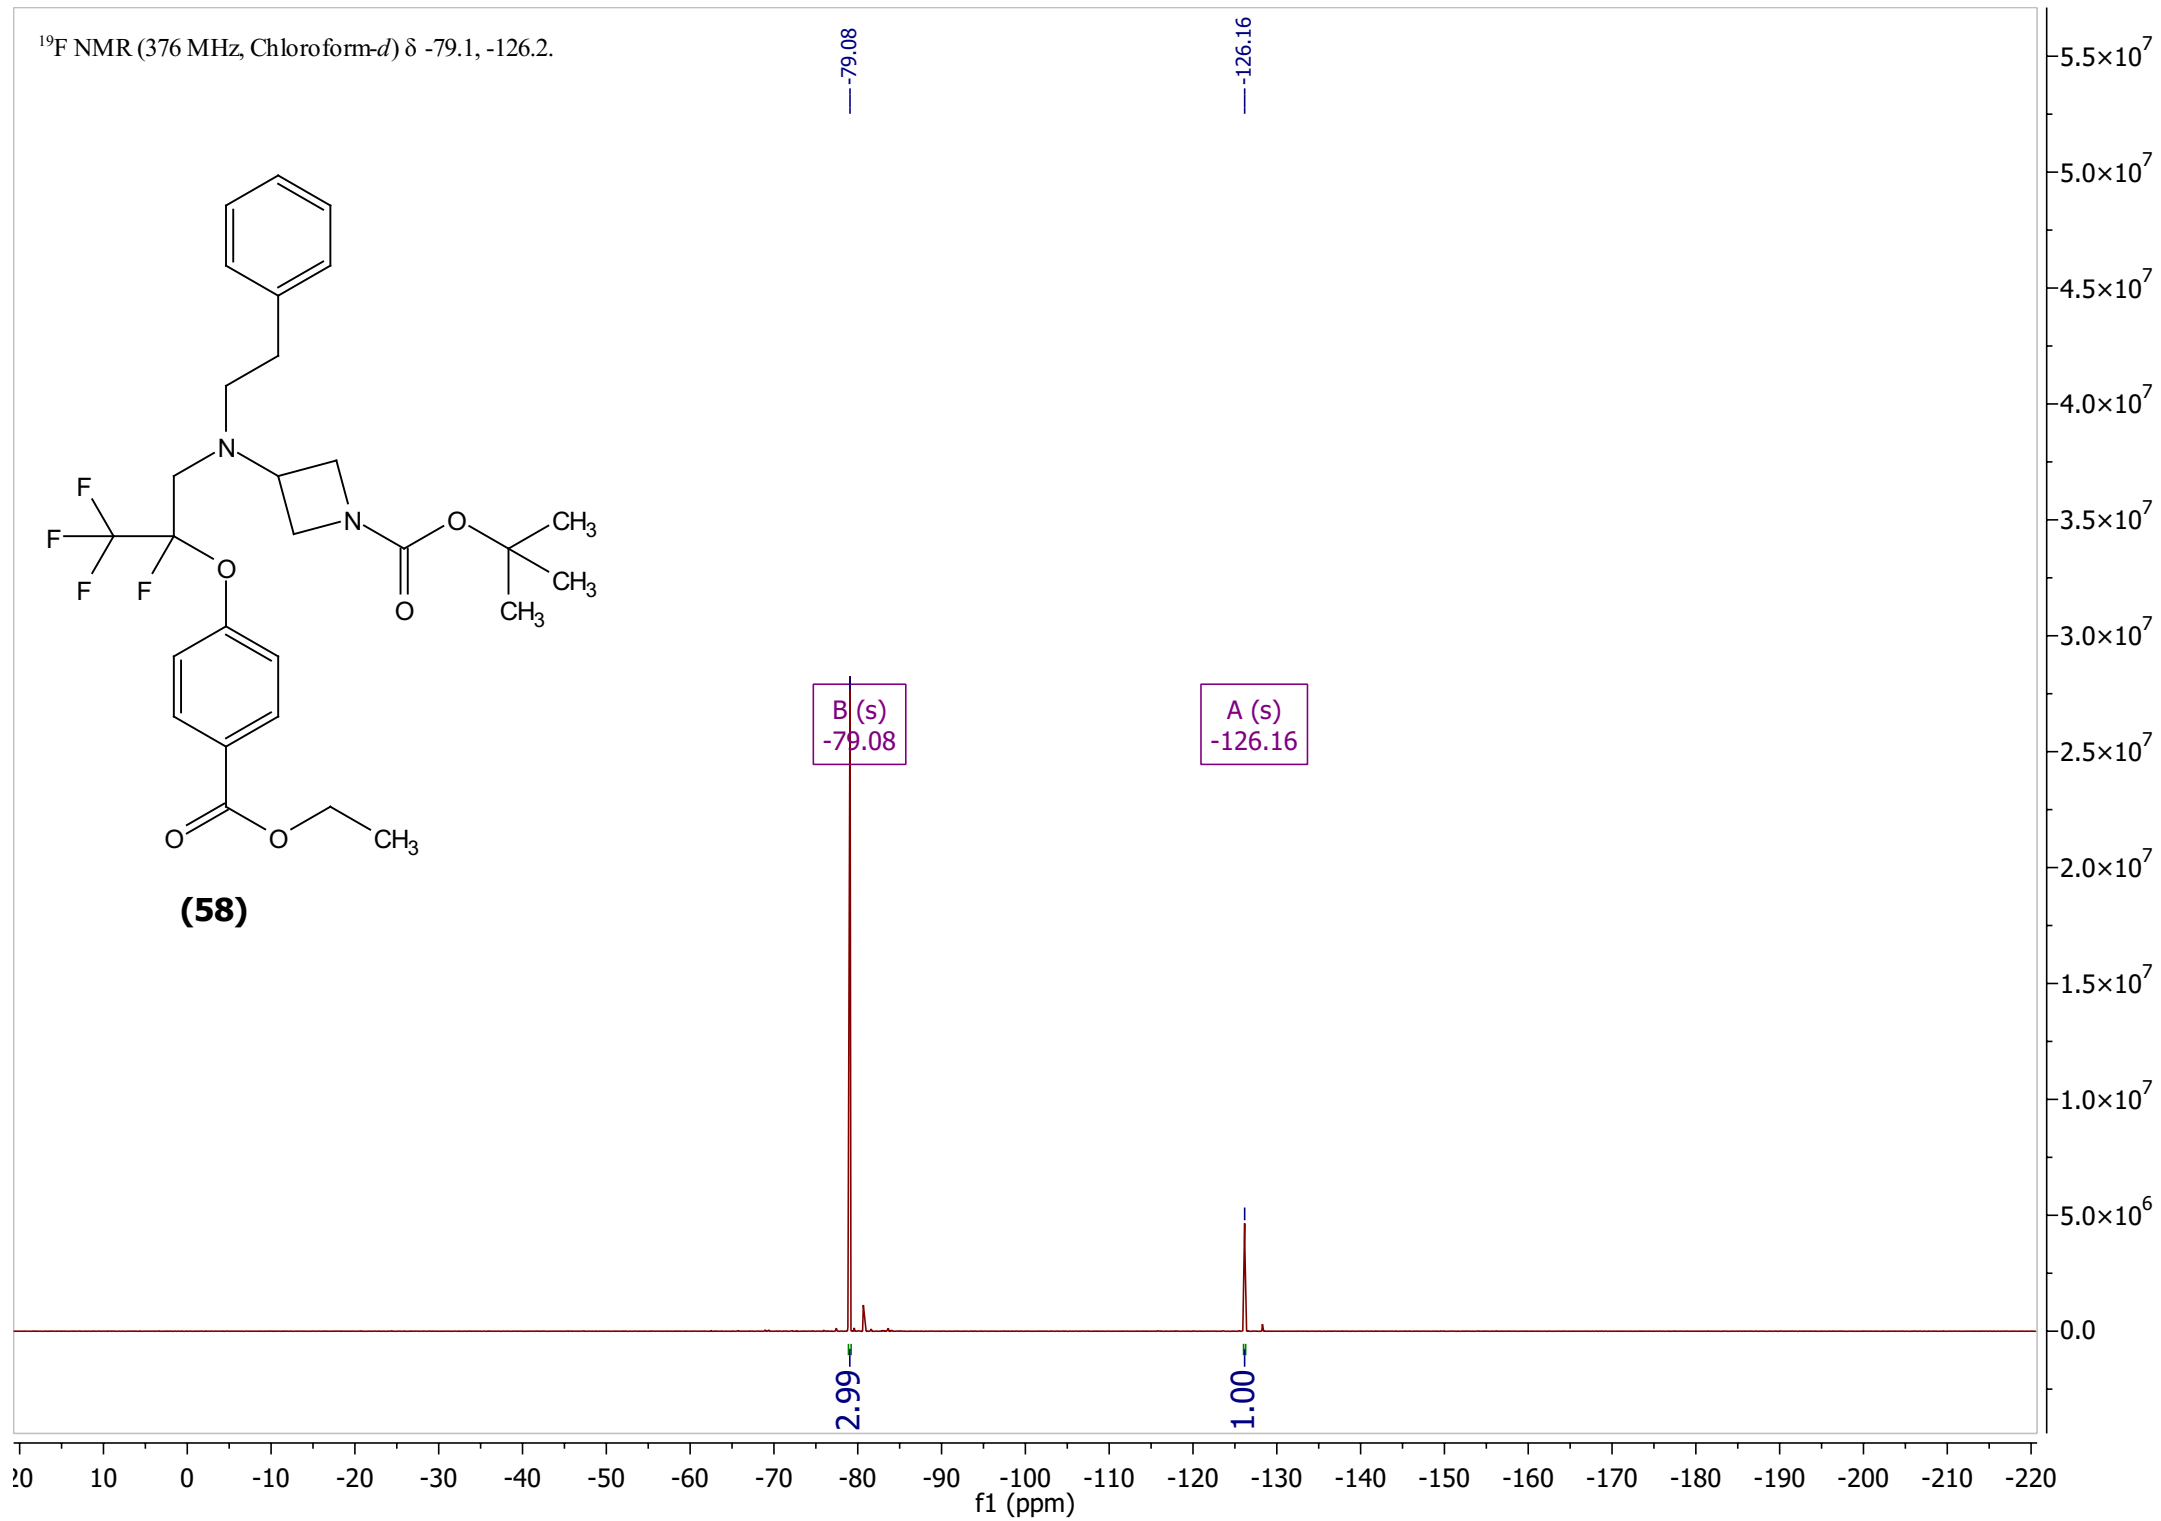

$^{13}\text{C}$  NMR (101 MHz, Chloroform-*d*)  $\delta$  165.8, 156.4, 155.9, 139.4, 131.3, 128.7, 128.6, 127.9, 126.4, 121.7 (d,  $J = 2.6$  Hz), 120.5 (qd,  $J = 289.4, 40.0$  Hz), 109.7 (dq,  $J = 242.5, 32.1$  Hz), 79.8, 61.2, 53.8, 52.5, 51.2 (d,  $J = 22.8$  Hz), 33.8, 28.4, 20.8, 14.4.

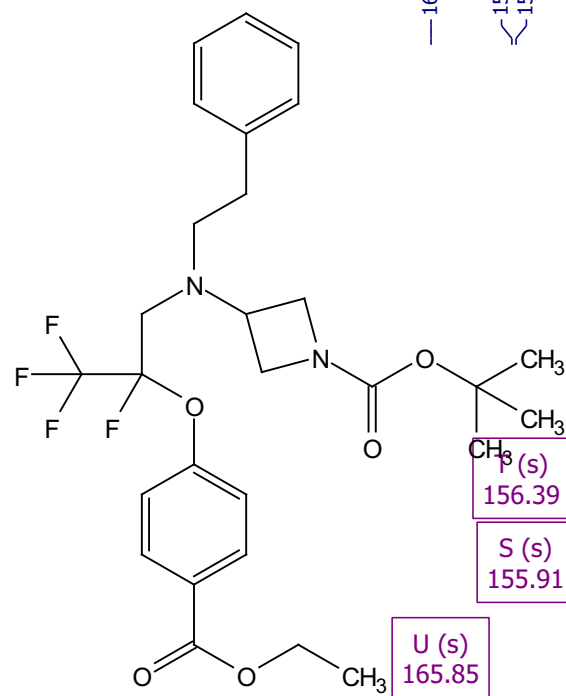

**(58)**

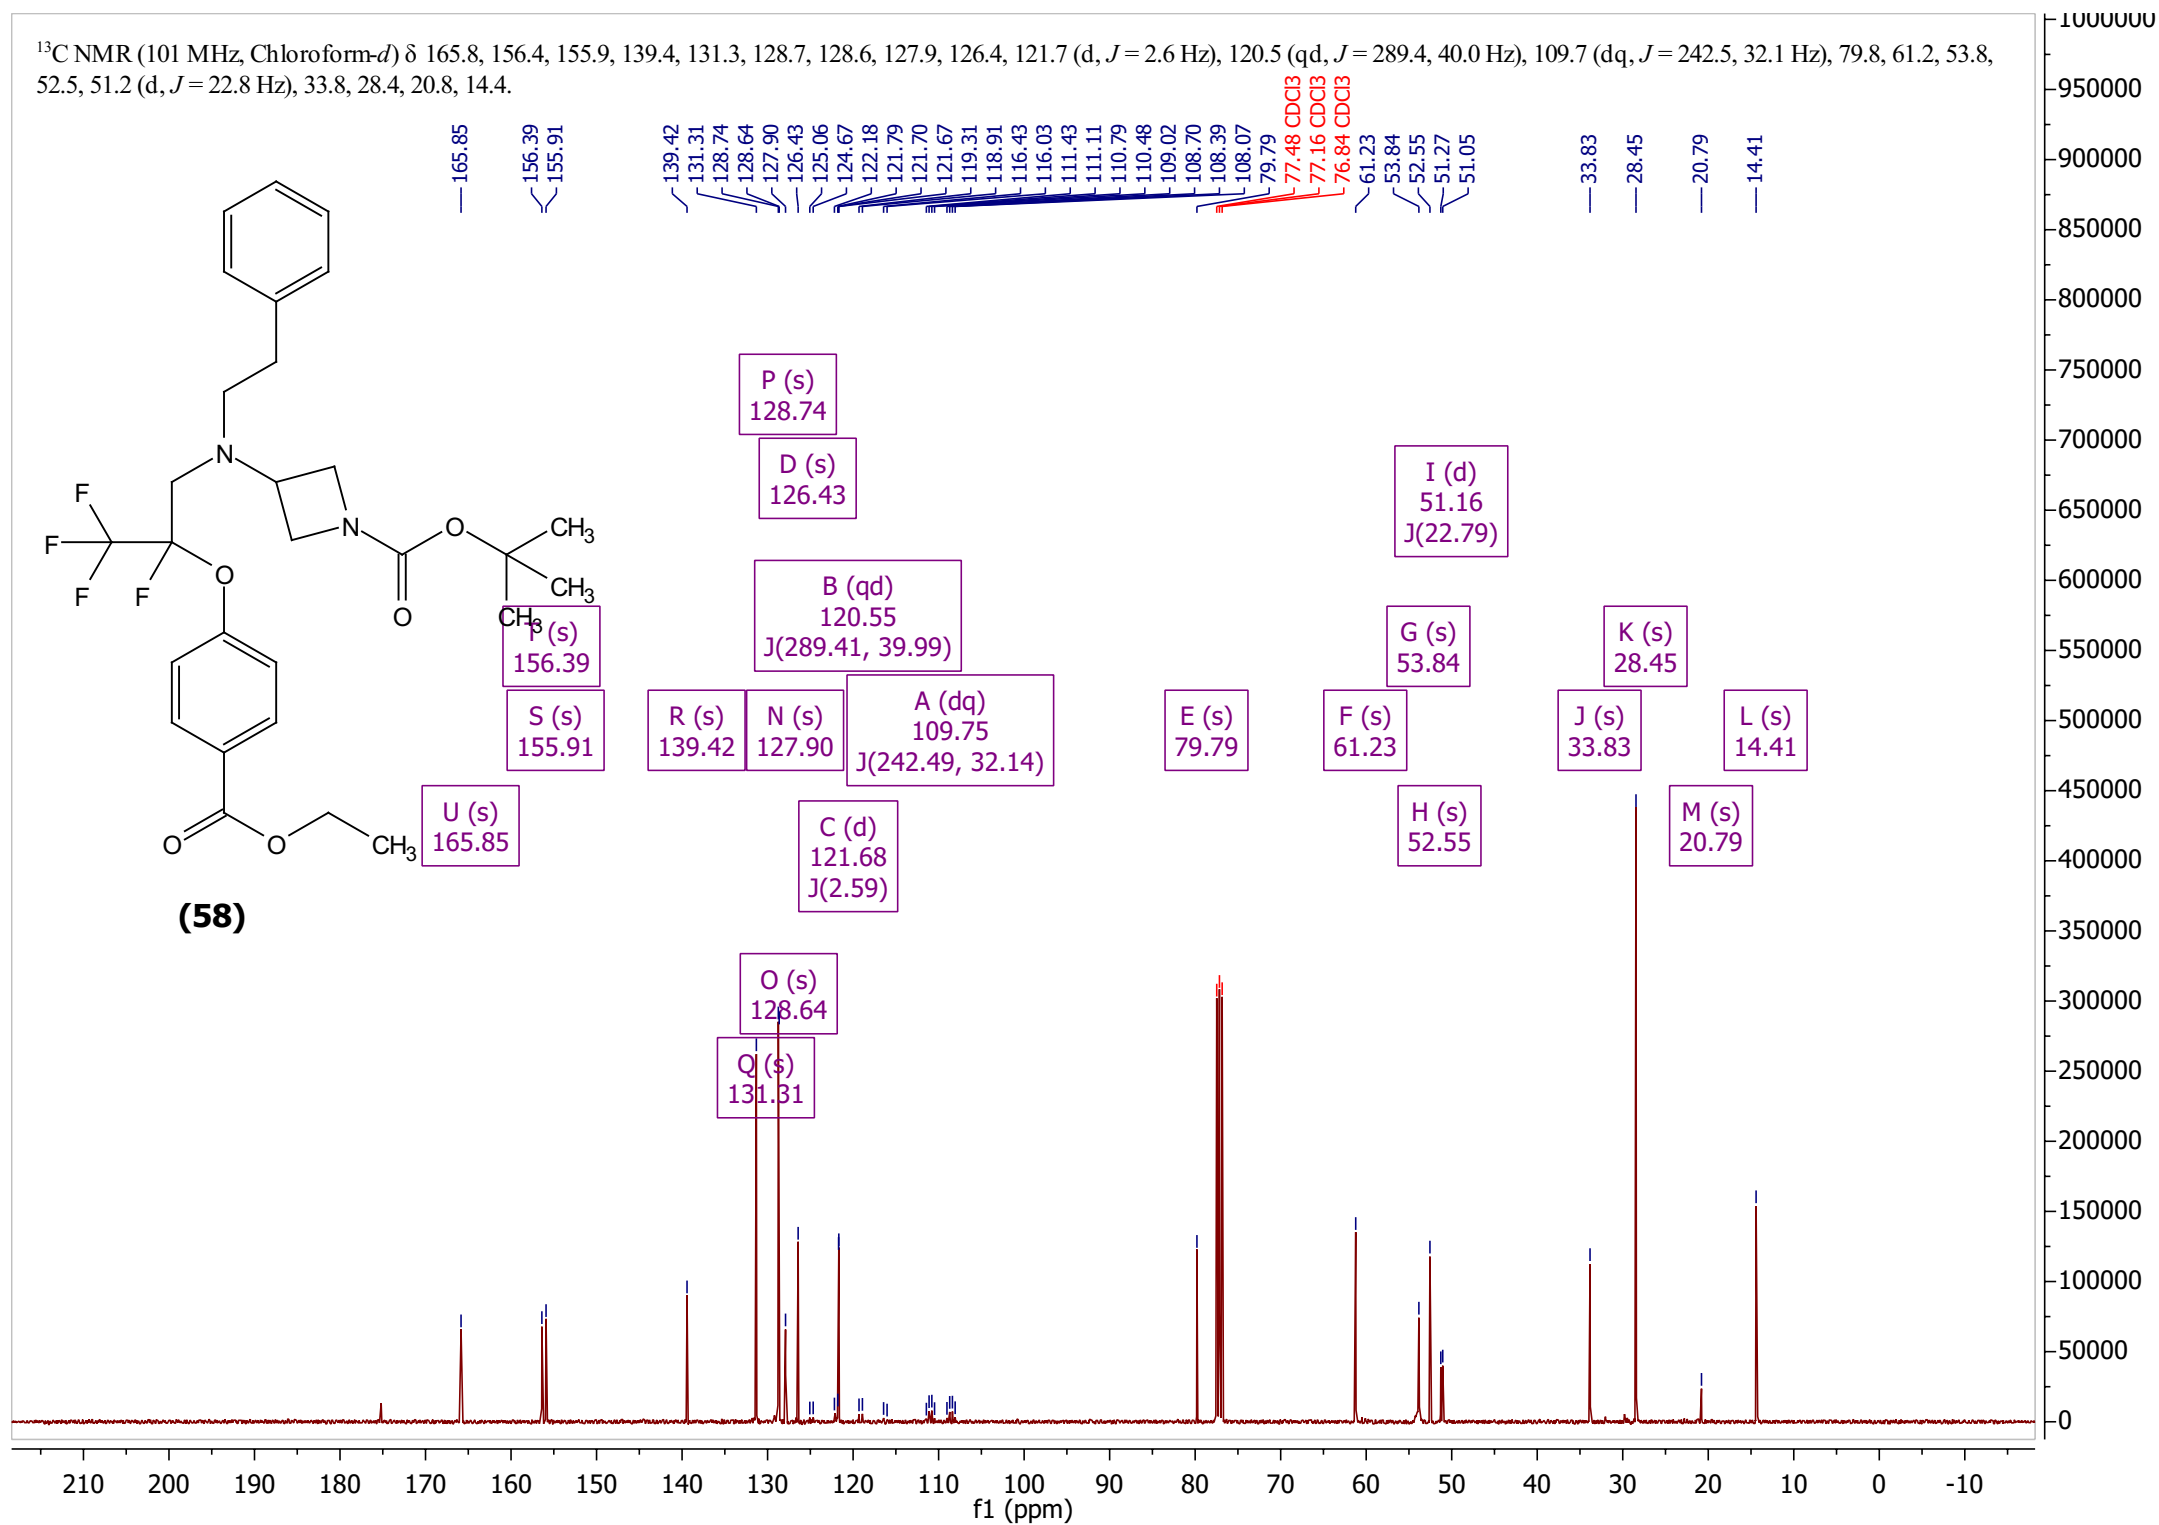

Supplement: d3cc04985j1.pdf [file d3cc04985j1.pdf]
